# Supplementary material for: The use of existing environmental networks for the post-market monitoring of GM crop cultivation in the EU
Source: Royal Society of Chemistry journal article supplement (doi:10.1039/c4em00093e), 2014-01-01
Supplement: c4em00093e1.pdf [file c4em00093e1.pdf]

## Supplementary information 1

# The use of existing environmental networks for the post-market monitoring of GM crop cultivation in the EU

(Links and contents verified on January 2014)

## Contents

|                                                                                                                                      |           |
|--------------------------------------------------------------------------------------------------------------------------------------|-----------|
| <b>Disclaimer</b> .....                                                                                                              | <b>5</b>  |
| <b>Table 1. Summary of identified EENs</b> .....                                                                                     | <b>6</b>  |
| <b>Table 2. Description of the detailed information collected for each EEN having been retained as possibly suitable in GS</b> ..... | <b>16</b> |
| <b>Belgium</b> .....                                                                                                                 | <b>19</b> |
| GSEN-09-0043.00.2 BE – Natuurpunt .....                                                                                              | 20        |
| GSEN-09-0044.00.2 BE – Natagora .....                                                                                                | 22        |
| GSEN-09-0045.00.2 BE – Arabel.....                                                                                                   | 24        |
| GSEN-09-0047.00.2 BE – Bodemkundige Dienst.....                                                                                      | 26        |
| GSEN-09-0157.00.1 BE – INBO .....                                                                                                    | 28        |
| GSEN-09-0194.00.1 BE – GIREA.....                                                                                                    | 30        |
| <b>Czech republic</b> .....                                                                                                          | <b>32</b> |
| GSEN-09-0006.00.2 CZ – State Phytosanitary Administration .....                                                                      | 33        |
| GSEN-09-0007.00.2 CZ – Central Institute for Supervising and testing in Agriculture .....                                            | 35        |
| GSEN-09-0008.00.2 CZ – Ministry of Agriculture .....                                                                                 | 37        |
| GSEN-09-0009.00.2 CZ – Nature conservation & landscape protection .....                                                              | 39        |
| GSEN-09-0010.00.2 CZ – Hydrometeorological Institute .....                                                                           | 41        |
| GSEN-09-0011.00.2 CZ – Apiculture Institute .....                                                                                    | 43        |
| GSEN-09-0012.00.3 CZ – Society for the Protection of butterflies .....                                                               | 45        |
| GSEN-09-0013.00.3 CZ – Czech Society for Ornithology .....                                                                           | 47        |
| GSEN-09-0014.00.1 CZ – National Institute of Public Health .....                                                                     | 49        |
| GSEN-09-0014.00.2 CZ – National Public Health Service.....                                                                           | 51        |
| <b>European Union</b> .....                                                                                                          | <b>53</b> |
| GSEN-09-0082.00.1 EU – RASFF .....                                                                                                   | 54        |
| GSEN-09-0137.00.1 EU – Coloss.....                                                                                                   | 56        |
| GSEN-09-0152.00.1 EU – BirdLife International.....                                                                                   | 58        |
| GSEN-09-0153.00.1 EU – Butterfly Conservation Europe.....                                                                            | 60        |
| GSEN-09-0154.00.1 EU – European Crop Protection Association.....                                                                     | 62        |
| GSEN-09-0156.00.1 EU – The European Birds Census Council.....                                                                        | 64        |
| GSEN-09-0158.00.1 EU – European Conservation Agriculture Federation.....                                                             | 66        |
| GSEN-09-0196.00.1 EU – EURING.....                                                                                                   | 68        |
| GSEN-09-0197.00.1 EU – ETC-W .....                                                                                                   | 70        |
| GSEN-09-0198.00.1 EU – ESDAC .....                                                                                                   | 72        |
| GSEN-09-0201.00.1 EU – European Red List.....                                                                                        | 74        |

|                                                                                       |            |
|---------------------------------------------------------------------------------------|------------|
| GSEN-09-0229.00.1 EU – European Soil Bureau Network .....                             | 76         |
| GSEN-09-0230.00.1 EU – ENVASSO .....                                                  | 78         |
| GSEN-09-0230.00.1bis EU – ENVASSO inventory .....                                     | 80         |
| <b>Denmark.....</b>                                                                   | <b>82</b>  |
| GSEN-09-0149.00.1 DK – Skov- og Naturstyrelsen .....                                  | 83         |
| <b>France .....</b>                                                                   | <b>85</b>  |
| GSEN-09-0119.00.1 F – Min of environment .....                                        | 86         |
| GSEN-09-0121.00.1 F – Min of agriculture (biodiversity).....                          | 88         |
| GSEN-09-0122.00.1 F – Min of agriculture (plant health).....                          | 90         |
| GSEN-09-0131.00.1 F – Vigie-Nature.....                                               | 92         |
| GSEN-09-0132.00.1 F – MNHN - national inventory .....                                 | 94         |
| GSEN-09-0133.00.1 F – MNHN - CRBPO.....                                               | 96         |
| GSEN-09-0134.00.1 F – Noé Conservation.....                                           | 98         |
| GSEN-09-0139.00.1 F – Société française d'Odonatologie .....                          | 100        |
| GSEN-09-0141.00.1 F – GIS Sol .....                                                   | 102        |
| GSEN-09-0142.00.2 F – IMAGE .....                                                     | 104        |
| GSEN-09-0143.00.1 F – Eaufrance .....                                                 | 106        |
| <b>Germany .....</b>                                                                  | <b>108</b> |
| GSEN-09-0051.00.3 DE – Tagfalter.....                                                 | 109        |
| GSEN-09-0052.00.2 DE – DDA .....                                                      | 111        |
| GSEN-09-0053.00.3 DE – AI Bienforschung .....                                         | 113        |
| GSEN-09-0055.00.2 DE – Deutsches Bienenmonitoring.....                                | 115        |
| GSEN-09-0056.00.2 DE – BDD .....                                                      | 117        |
| GSEN-09-0057.00.3 DE – DJV .....                                                      | 119        |
| GSEN-09-0058.00.2 DE – BVL GMO Register .....                                         | 121        |
| GSEN-09-0059.00.2 DE – UBA KIS.....                                                   | 123        |
| GSEN-09-0060.00.2 DE – ISIP .....                                                     | 125        |
| <b>Hungary .....</b>                                                                  | <b>127</b> |
| GSEN-09-0001.00.2 HU – Plant, Soil & Agri environment.....                            | 128        |
| GSEN-09-0002.00.2 HU – Environmental and Nature Conservation Inspection Service ..... | 130        |
| GSEN-09-0003.00.2 HU – National Public Health Service .....                           | 132        |
| GSEN-09-0004.00.2 HU – Animal Health and Welfare.....                                 | 134        |
| GSEN-09-0005.00.2 HU – Rural Ag master.....                                           | 136        |
| <b>Netherlands .....</b>                                                              | <b>138</b> |
| GSEN-09-0025.00.2 NL – EIS .....                                                      | 139        |
| GSEN-09-0026.00.2 NL – RIKILT .....                                                   | 141        |
| GSEN-09-0027.00.2 NL – PRI .....                                                      | 143        |
| GSEN-09-0028.00.2 NL – NEV.....                                                       | 145        |
| GSEN-09-0030.00.2 NL – PPO.....                                                       | 147        |
| GSEN-09-0031.00.2 NL – Naturalis.....                                                 | 149        |
| GSEN-09-0032.00.2 NL – Species Catalogue .....                                        | 151        |
| GSEN-09-0033.00.2 NL – VOFF.....                                                      | 153        |
| GSEN-09-0033.00.2 NL – VOFF.....                                                      | 155        |
| GSEN-09-0035.00.1 NL – BLWG.....                                                      | 157        |

|                                                                        |            |
|------------------------------------------------------------------------|------------|
| GSEN-09-0036.00.2 NL – FLORON .....                                    | 159        |
| GSEN-09-0037.00.1 NL – NMV .....                                       | 161        |
| GSEN-09-0038.00.2 NL – RAVON .....                                     | 163        |
| GSEN-09-0039.00.2 NL – SOVON .....                                     | 165        |
| GSEN-09-0040.00.2 NL – TINEA.....                                      | 167        |
| GSEN-09-0041.00.2 NL – Vlinderstichting.....                           | 169        |
| GSEN-09-0042.00.3 NL – Zoogdierenvereniging .....                      | 171        |
| <b>Poland.....</b>                                                     | <b>173</b> |
| GSEN-09-0101.00.2 PL – IOP .....                                       | 174        |
| GSEN-09-0103.00.2 PL – MODR .....                                      | 176        |
| GSEN-09-0104.00.2 PL – OTOP .....                                      | 178        |
| <b>Portugal .....</b>                                                  | <b>180</b> |
| GSEN-09-0205.00.1 PT – ASEA.....                                       | 181        |
| GSEN-09-0213.00.1 PT – Min Agric. GMO Register .....                   | 183        |
| GSEN-09-0216.00.1 PT – Water Institute .....                           | 185        |
| GSEN-09-0220.00.1 PT – EDIA.....                                       | 187        |
| GSEN-09-0221.00.1 PT – GPP.....                                        | 189        |
| GSEN-09-0222.00.1 ES-PT – Iberian Mirmecology Association .....        | 191        |
| GSEN-09-0223.00.1 PT – SPEA.....                                       | 193        |
| GSEN-09-0233.00.1 PT – Min Agric. soil, sust. agric. agron.pract. .... | 195        |
| <b>Romania.....</b>                                                    | <b>197</b> |
| GSEN-09-0061.00.2 RO – Min Environment .....                           | 198        |
| GSEN-09-0062.00.2 RO – NEPA.....                                       | 200        |
| GSEN-09-0063.00.2 RO – NCSD .....                                      | 202        |
| GSEN-09-0064.00.2 RO – ISP.....                                        | 204        |
| GSEN-09-0065.00.1 RO – Ministry of Agriculture .....                   | 206        |
| GSEN-09-0071.00.2 RO – ANSVSA.....                                     | 208        |
| GSEN-09-0072.00.2 RO – Natura 2000.....                                | 210        |
| GSEN-09-0073.00.2 RO – ASAS .....                                      | 212        |
| GSEN-09-0076.00.2 RO – ICDPP .....                                     | 214        |
| GSEN-09-0080.00.2 RO – ICPA .....                                      | 216        |
| GSEN-09-0224.00.1 RO – ICDA.....                                       | 218        |
| GSEN-09-0228.00.1 RO – SOR.....                                        | 220        |
| <b>Slovakia .....</b>                                                  | <b>222</b> |
| GSEN-09-0015.00.2 SK – State Nature Conservancy.....                   | 223        |
| GSEN-09-0016.00.2 SK – UKSUP.....                                      | 225        |
| GSEN-09-0017.00.2 SK – Min Agriculture .....                           | 227        |
| GSEN-09-0018.00.2 SK – Slovak Ornithology Society .....                | 229        |
| GSEN-09-0019.00.2 SK – Hydrometeorological Institute .....             | 231        |
| GSEN-09-0020.00.2 SK – Centre for Animal Research.....                 | 233        |
| GSEN-09-0021.00.2 SK – Lepidopteran Society .....                      | 235        |
| <b>Spain .....</b>                                                     | <b>237</b> |
| GSEN-09-0083.00.2 ES – ASEAN.....                                      | 238        |
| GSEN-09-0088.00.2 ES – RASVE.....                                      | 240        |

|                                                                       |            |
|-----------------------------------------------------------------------|------------|
| GSEN-09-0089.00.2 ES – Perfil Ambiental de España.....                | 242        |
| GSEN-09-0090.00.2 ES – SINAC .....                                    | 244        |
| GSEN-09-0092.00.2 ES – Phytoma.....                                   | 246        |
| GSEN-09-0093.00.2 ES – AEAC.SV .....                                  | 248        |
| GSEN-09-0094.00.2 ES – AEPLA .....                                    | 250        |
| GSEN-09-0096.00.2 ES – MARM Biodiversidad .....                       | 252        |
| GSEN-09-0097.00.2 ES – MARM GMO .....                                 | 254        |
| GSEN-09-0098.00.3 ES – Sociedad Española de Ornitología .....         | 256        |
| GSEN-09-0100.00.2 ES – SEEA .....                                     | 258        |
| <b>Sweden .....</b>                                                   | <b>260</b> |
| GSEN-09-0225.00.1 SE – BioSoM .....                                   | 261        |
| GSEN-09-0226.00.1 SE – SOF.....                                       | 263        |
| GSEN-09-0227.00.1 SE – EPA.....                                       | 265        |
| GSEN-09-0231.00.1 SE – Swedish bird survey.....                       | 267        |
| <b>United Kingdom .....</b>                                           | <b>269</b> |
| GSEN-09-0150.00.1 GB – National Bee Unit.....                         | 270        |
| GSEN-09-0164.00.2 GB – ACCS.....                                      | 272        |
| GSEN-09-0165.00.1 GB – LEAF.....                                      | 274        |
| GSEN-09-0166.00.2 GB – FERA.....                                      | 276        |
| GSEN-09-0167.00.1 GB – HSE .....                                      | 278        |
| GSEN-09-0170.00.1 GB – BCPC.....                                      | 280        |
| GSEN-09-0171.00.1 GB – SCIMAC.....                                    | 282        |
| GSEN-09-0172.00.2 GB – FMA-BSFP .....                                 | 284        |
| GSEN-09-0173.00.2 GB – DEFRA .....                                    | 286        |
| GSEN-09-0173.00.2 bis GB – DEFRA.....                                 | 288        |
| GSEN-09-0175.00.1 GB – SEED.....                                      | 290        |
| GSEN-09-0177.00.2 GB – Natural England.....                           | 292        |
| GSEN-09-0178.00.1 GB – Scottish Natural Heritage.....                 | 294        |
| GSEN-09-0179.00.1 GB – CEH .....                                      | 296        |
| GSEN-09-0180.00.1 GB – Butterfly Monitoring Scheme .....              | 298        |
| GSEN-09-0181.00.1 GB – Environment Agency .....                       | 300        |
| GSEN-09-0182.00.1 GB – National Biodiversity Network.....             | 302        |
| GSEN-09-0183.00.1 GB – NSRI, Silsoe .....                             | 304        |
| GSEN-09-0184.00.1 GB – Drinking Water Inspectorate .....              | 306        |
| GSEN-09-0185.00.1 GB – Metereological Office.....                     | 308        |
| GSEN-09-0187.00.1 GB – WIIS.....                                      | 310        |
| GSEN-09-0192.00.1 GB – PRC .....                                      | 312        |
| GSEN-09-0193.00.1 GB – Joint Nature Conservation Committee.....       | 314        |
| GSEN-09-0234.00.1 GB – British Trust for Ornithology.....             | 316        |
| GSEN-09-0235.00.1 GB – Royal Society for the Protection of Birds..... | 318        |

## **Disclaimer**

*Information on Existing Environmental Networks (EEN) is based on publicly available information and analysis of this information by the authors. We do not make any representation as to the accuracy and completeness of this information, and will not be liable for any damages resulting directly or indirectly related to the use of this information. The inclusion of this information in this analysis does not mean that the individual networks support or disapprove the use of GMOs. Neither does it engage the network in the general surveillance analysis and conclusions.*

**Table 1. Summary of identified EENs**

(Territory abbreviations - BE: Belgium; CZ: Czech Republic; DE: Germany; DK: Denmark; ES: Spain; EU: European Union; FR: France; HU: Hungary; NL: the Netherlands; PL: Poland; PT: Portugal; RO: Romania; SE: Sweden; SK: Slovakia; UK: United Kingdom; Type of organisation - n.c.: not further characterised)

| Country | Network Name translation (acronym)                                                                        | Type of organisation | Protection goals                                                                                     | Influencing factor                                 |
|---------|-----------------------------------------------------------------------------------------------------------|----------------------|------------------------------------------------------------------------------------------------------|----------------------------------------------------|
| BE      | <a href="#">Belgian Arachnology Association</a> (Arabel)                                                  | Nature conservation  | Biodiversity: other invertebrates                                                                    |                                                    |
| BE      | Belgian Information Centre for Apiculture                                                                 | n.c.                 |                                                                                                      |                                                    |
| BE      | Flemish Institute for Biotech (VIB)                                                                       | n.c.                 |                                                                                                      |                                                    |
| BE      | <a href="#">Flemish nature conservation society</a> (Natuurpunt)                                          | Nature conservation  | Biodiversity: mammals, birds, reptiles, amphibians, insects, butterflies, other invertebrates, fungi |                                                    |
| BE      | Gembloux Agro-Bio Tech (Agricultural University)                                                          | n.c.                 |                                                                                                      |                                                    |
| BE      | <a href="#">Interuniversity Group on Applied Ecological Research</a> (GIREA)                              | Academic             | Biodiversity: general                                                                                |                                                    |
| BE      | <a href="#">Research Institute for Nature and Forest</a> ; Scientific institute of the Flemish Government | Governmental         | Biodiversity: general, Soil function, Water quality                                                  | Other environmental conditions                     |
| BE      | <a href="#">Soil Service of Belgium</a>                                                                   | Academic             | Soil function, Sustainable agriculture                                                               |                                                    |
| BE      | University of Ghent; Terrestrial Ecology Unit (TEREC)                                                     | n.c.                 |                                                                                                      |                                                    |
| BE      | <a href="#">Walloon nature conservation society</a> (Natagora)                                            | Nature conservation  | Biodiversity: mammals, birds, reptiles, amphibians, insects, butterflies, fungi                      |                                                    |
| CZ      | <a href="#">Agency for Nature Conservation and Landscape Protection of the Czech Republic</a>             | Governmental         | Biodiversity: general                                                                                |                                                    |
| CZ      | <a href="#">Apiculture Institute</a>                                                                      | Professional         | Biodiversity: insects                                                                                |                                                    |
| CZ      | <a href="#">Central Institute for Supervising and Testing in Agriculture</a> (UKZUZ)                      | Governmental         | Animal Health, Plant health, Soil function                                                           | Agronomic practice                                 |
| CZ      | <a href="#">Czech Hydrometeorological Institute</a>                                                       | Governmental         | Water quality                                                                                        | Other environmental conditions                     |
| CZ      | <a href="#">Czech Society for Ornithology</a> (ČSO/BirdLife)                                              | Nature conservation  | Biodiversity: birds                                                                                  |                                                    |
| CZ      | <a href="#">Ministry of Agriculture: GMO location registers</a>                                           | Governmental         |                                                                                                      | GMO cultivation                                    |
| CZ      | <a href="#">Ministry of Health: chief health officer and hygienic stations</a>                            | Governmental         | Human health                                                                                         |                                                    |
| CZ      | <a href="#">National Institute of Public Health</a>                                                       | Governmental         | Human health                                                                                         |                                                    |
| CZ      | <a href="#">Society for the Protection of butterflies</a> (SOM)                                           | Nature conservation  | Biodiversity: butterflies                                                                            |                                                    |
| CZ      | <a href="#">State Phytosanitary Administration</a> (SRS)                                                  | Governmental         | Plant health                                                                                         | Agronomic practice, Other environmental conditions |

| Country | Network Name translation (acronym)                                                           | Type of organisation | Protection goals                                                                           | Influencing factor                                                   |
|---------|----------------------------------------------------------------------------------------------|----------------------|--------------------------------------------------------------------------------------------|----------------------------------------------------------------------|
| DE      | <a href="#">Federal Office of Consumer Protection and Food Safety (BVL): GMO register</a>    | Governmental         |                                                                                            | GMO cultivation                                                      |
| DE      | <a href="#">German bee monitoring</a> (DEBIMO)                                               | Professional         | Biodiversity: insects                                                                      |                                                                      |
| DE      | <a href="#">German butterfly monitoring</a> (TMD)                                            | Nature conservation  | Biodiversity: butterflies                                                                  |                                                                      |
| DE      | <a href="#">German Hunting Association</a> (DJV)                                             | Nature conservation  | Biodiversity: mammals, birds                                                               |                                                                      |
| DE      | <a href="#">German Ornithologists Society</a> (DDA)                                          | Nature conservation  | Biodiversity: birds                                                                        |                                                                      |
| DE      | <a href="#">Information System for Integrated Plant Protection</a> (ISIP)                    | Governmental         |                                                                                            | Agronomic practice, Plant protection, Other environmental conditions |
| DE      | <a href="#">Federal Environment Agency: core environmental indicators</a> (KIS)              | Governmental         | Sustainable agriculture                                                                    | Agronomic practice                                                   |
| DE      | <a href="#">Society of the German Bee Research Institutes</a>                                | Academic             | Biodiversity: insects                                                                      |                                                                      |
| DE      | <a href="#">Soil monitoring programs in the different states</a>                             | Governmental         | Soil function                                                                              |                                                                      |
| DK      | <a href="#">Danish Forest and Nature Agency</a>                                              | Governmental         | Biodiversity: general                                                                      | Other environmental conditions                                       |
| ES      | Centre for Sociological Research (CIS)                                                       | n.c.                 |                                                                                            |                                                                      |
| ES      | <a href="#">Iberian Myrmecology Association</a>                                              | Nature conservation  | Biodiversity: insects                                                                      |                                                                      |
| ES      | <a href="#">Ministry of Agriculture, Food and Environment: GMO register</a>                  | Governmental         |                                                                                            | GMO cultivation                                                      |
| ES      | <a href="#">Ministry of Agriculture, Food and Environment: maps on biodiversity</a>          | Governmental         | Biodiversity: general                                                                      |                                                                      |
| ES      | <a href="#">Ministry of Agriculture, Food and Environment: Spain's Environmental Profile</a> | Governmental         | Biodiversity: general, Plant health, Soil function, Water quality, Sustainable agriculture | Agronomic practice, Other environmental conditions                   |
| ES      | Ministry of Health, Social Services and Equality                                             | n.c.                 |                                                                                            |                                                                      |
| ES      | Ministry of Industry: Strategic Stockpile of Oil Products Corporation (CORES)                | n.c.                 |                                                                                            |                                                                      |
| ES      | <a href="#">National Information System on Drinking-water</a> (SINAC)                        | Governmental         | Water quality                                                                              | Other environmental conditions                                       |
| ES      | <a href="#">Plant Protection Products Manufacturers Association</a> (AEPLA)                  | Professional         |                                                                                            | Plant protection                                                     |
| ES      | River Hydrographic Confederations (Institutions responsible for water quality)               | n.c.                 |                                                                                            |                                                                      |
| ES      | <a href="#">Spanish Conservation Tillage Association</a>                                     | Professional         | Soil function, Sustainable agriculture                                                     | Agronomic practice                                                   |
| ES      | Spanish Feed Compounders Association (CESFAC)                                                | n.c.                 |                                                                                            |                                                                      |
| ES      | <a href="#">Spanish Food Safety Agency</a> (AESAN)                                           | Governmental         | Human health, Animal health                                                                |                                                                      |
| ES      | <a href="#">Spanish Ornithological Society</a> (SEO/BirdLife)                                | Nature conservation  | Biodiversity: birds                                                                        |                                                                      |
| ES      | <a href="#">Spanish Plant Protection Experts and magazines</a> (PHYTOMA)                     | Professional         | Plant health                                                                               | Agronomic practice, Plant protection                                 |

| Country | Network Name translation (acronym)                                                                                                      | Type of organisation | Protection goals                          | Influencing factor                                 |
|---------|-----------------------------------------------------------------------------------------------------------------------------------------|----------------------|-------------------------------------------|----------------------------------------------------|
| ES      | Spanish Society of Allergology and Clinical Immunology (SEAIC)                                                                          | n.c.                 |                                           |                                                    |
| ES      | <a href="#">Spanish Society of Applied Entomology</a> (SEEA)                                                                            | Nature conservation  | Biodiversity: insects                     |                                                    |
| ES      | <a href="#">Ministry of Agriculture, Food and Environment: Veterinary Sanitary Alerts Network</a> (RASVE)                               | Governmental         | Animal health                             |                                                    |
| EU      | <a href="#">BirdLife International, European division</a>                                                                               | Nature conservation  | Biodiversity: birds                       |                                                    |
| EU      | <a href="#">Butterfly Conservation Europe</a>                                                                                           | Nature conservation  | Biodiversity: butterflies                 |                                                    |
| EU      | <a href="#">EC Rapid Alert System for Food and Feed</a> (RASFF)                                                                         | Governmental         | Human health, Animal health               |                                                    |
| EU      | ECOLOGICAL NETWORK for the promotion of convergent conservation strategies in COASTAL HABITATS of COMMUNITY significance (ECONET-COAST) | n.c.                 |                                           |                                                    |
| EU      | Emerald network (EU + other countries) Bern Convention - Natura 2000                                                                    | n.c.                 |                                           |                                                    |
| EU      | <a href="#">ENVIRONMENTAL ASSESSMENT OF SOIL FOR MONITORING</a> (ENVASSO): final report                                                 | Academic             | Soil function, Sustainable agriculture    | Agronomic practice, Other environmental conditions |
| EU      | <a href="#">ENVIRONMENTAL ASSESSMENT OF SOIL FOR MONITORING</a> (ENVASSO): inventory (volumes IIa and IIb)                              | Academic             | Soil function, Sustainable agriculture    | Agronomic practice, Other environmental conditions |
| EU      | <a href="#">EURING ringing scheme</a>                                                                                                   | Nature conservation  | Biodiversity: birds                       |                                                    |
| EU      | <a href="#">European Conservation Agriculture Federation</a> (ECAAF)                                                                    | Professional         | Soil function, Sustainable agriculture    |                                                    |
| EU      | <a href="#">European Crop Protection association</a> (ECPA)                                                                             | Professional         | Human health, Animal health, Plant health |                                                    |
| EU      | European Phenology Network (EPN)                                                                                                        | n.c.                 |                                           |                                                    |
| EU      | European Professional Beekeepers Association (EPBA)                                                                                     | n.c.                 |                                           |                                                    |
| EU      | <a href="#">European Red List</a>                                                                                                       | Nature conservation  | Biodiversity: general                     |                                                    |
| EU      | <a href="#">European Soil Bureau Network</a> (ESBN)                                                                                     | Governmental         | Soil function, Sustainable agriculture    | Agronomic practice, Other environmental conditions |
| EU      | <a href="#">European Soil Data Centre</a> (ESDAC)                                                                                       | Governmental         | Soil function                             | Other environmental conditions                     |
| EU      | <a href="#">European Topic Centre on Water Eionet Water</a> (formerly EUROWATERNET)                                                     | Governmental         | Water quality                             | Other environmental conditions                     |
| EU      | Fish-based Assessment Method for the Ecological Status of European Rivers (FAME)                                                        | n.c.                 |                                           |                                                    |
| EU      | Green Cross International                                                                                                               | n.c.                 |                                           |                                                    |



| Country | Network Name translation (acronym)                                                                                          | Type of organisation | Protection goals                                                                                          | Influencing factor                                 |
|---------|-----------------------------------------------------------------------------------------------------------------------------|----------------------|-----------------------------------------------------------------------------------------------------------|----------------------------------------------------|
| EU      | <a href="#">Prevention of COlony LOSSes network</a> (COLOSS)                                                                | Professional         | Biodiversity: insects                                                                                     |                                                    |
| EU      | <a href="#">The European Birds Census Council</a> (EBCC)                                                                    | Nature conservation  | Biodiversity: birds                                                                                       |                                                    |
| FR      | Biodiversity Network for Bees                                                                                               | n.c.                 |                                                                                                           |                                                    |
| FR      | <a href="#">EAUFRANCE</a> , the water portal (semi-official network)                                                        | Governmental         | Water quality                                                                                             | Other environmental conditions                     |
| FR      | <a href="#">French Society of Odonatology</a> (SFO)                                                                         | Nature conservation  | Biodiversity: insects                                                                                     |                                                    |
| FR      | INRA: Environment and Agronomy dept.                                                                                        | n.c.                 |                                                                                                           |                                                    |
| FR      | INRA: Plant Health and Environment dept.                                                                                    | n.c.                 |                                                                                                           |                                                    |
| FR      | Ministry of Ecology, Sustainable Development and Energy: Sustainable development                                            | n.c.                 |                                                                                                           |                                                    |
| FR      | Ministry of Ecology, Sustainable Development and Energy: <a href="#">Observation and Statistics Service</a> (formerly IFEN) | Governmental         | Biodiversity: general, Animal health, Plant health, Soil function, Water quality, Sustainable agriculture | Agronomic practice, Other environmental conditions |
| FR      | Ministry of Food, Agriculture and Forests: Regional services for plant protection                                           | Governmental         | Plant health                                                                                              | Agronomic practice, GMO cultivation                |
| FR      | Ministry of Food, Agriculture and Forests: <a href="#">National strategy for biodiversity</a>                               | Governmental         | Biodiversity: general, Sustainable agriculture                                                            | Agronomic practice                                 |
| FR      | <a href="#">National Water and Aquatic Environments</a> (ONEMA), Hydrobiology network                                       | Governmental         | Biodiversity: fish, Water quality                                                                         | Other environmental conditions                     |
| FR      | Natural Reserves of France                                                                                                  | n.c.                 |                                                                                                           |                                                    |
| FR      | Natural Science Museum: <a href="#">National inventory of the natural heritage</a>                                          | Governmental         | Biodiversity: general                                                                                     |                                                    |
| FR      | Natural Science Museum: <a href="#">Vigie-nature</a>                                                                        | Governmental         | Biodiversity: mammals, birds, butterflies, other invertebrates, plants                                    |                                                    |
| FR      | <a href="#">Noah Conservation</a>                                                                                           | Nature conservation  | Biodiversity: insects, butterflies                                                                        |                                                    |
| FR      | <a href="#">Research Centre for Ringing Bird Populations</a> (CRBPO)                                                        | Governmental         | Biodiversity: birds                                                                                       |                                                    |
| FR      | <a href="#">Soil Research</a> (GIS Sol)                                                                                     | Governmental         | Soil function                                                                                             | Other environmental conditions                     |
| HU      | <a href="#">Environmental and Nature Conservation Inspection Service</a>                                                    | Governmental         | Biodiversity: general, Soil function, Water quality                                                       |                                                    |
| HU      | Ministry of Agriculture and Rural Development: Rural Ag Master Network                                                      | Governmental         | Sustainable agriculture                                                                                   | Agronomic practice, Other environmental conditions |
| HU      | Ministry of Agriculture: <a href="#">Animal Health and Welfare Directorate</a>                                              | Governmental         | Animal health                                                                                             |                                                    |
| HU      | Ministry of Agriculture: <a href="#">Office of Plant, Soil and Agri-</a>                                                    | Governmental         | Sustainable agriculture                                                                                   | Agronomic practice, Plant protection               |

| Country | Network Name translation (acronym)                                                                                   | Type of organisation | Protection goals                                           | Influencing factor |
|---------|----------------------------------------------------------------------------------------------------------------------|----------------------|------------------------------------------------------------|--------------------|
|         | <a href="#">environment</a>                                                                                          |                      |                                                            |                    |
| HU      | <a href="#">National Public Health Service</a>                                                                       | Governmental         | Human health                                               |                    |
| NL      | <a href="#">Bryology and Lichenology Working Group</a> (BLWG)                                                        | Nature conservation  | Biodiversity: plants, fungi                                |                    |
| NL      | Certification system for sustainable products and services (Milieukeur)                                              | n.c.                 |                                                            |                    |
| NL      | <a href="#">Dutch Butterfly Conservation Foundation</a>                                                              | Nature conservation  | Biodiversity: butterflies                                  |                    |
| NL      | <a href="#">Dutch Mammal Society</a>                                                                                 | Nature conservation  | Biodiversity: mammals                                      |                    |
| NL      | <a href="#">Dutch Mycological Society</a> (NMV)                                                                      | Nature conservation  | Biodiversity: fungi                                        |                    |
| NL      | <a href="#">Dutch Species Catalogue</a>                                                                              | Nature conservation  | Biodiversity: general                                      |                    |
| NL      | <a href="#">Flora and Fauna Fieldwork Foundation</a> (VOFF)                                                          | Nature conservation  | Biodiversity: general                                      |                    |
| NL      | <a href="#">Foundation ANEMOON</a> (acronym for Analysis, Education and Marine Ecology)                              | Nature conservation  | Biodiversity: general                                      |                    |
| NL      | <a href="#">Foundation European Invertebrate Survey Netherlands</a> (EIS)                                            | Nature conservation  | Biodiversity: insects, other invertebrates                 |                    |
| NL      | <a href="#">Foundation FLORON</a> (floristic research in the Netherlands)                                            | Nature conservation  | Biodiversity: plants                                       |                    |
| NL      | <a href="#">Foundation TINEA</a> (small butterflies)                                                                 | Nature conservation  | Biodiversity: butterflies                                  |                    |
| NL      | Foundation Utrecht Landscape                                                                                         | n.c.                 |                                                            |                    |
| NL      | <a href="#">National Museum of Natural History</a> (Naturalis)                                                       | Academic             | Biodiversity: general                                      |                    |
| NL      | <a href="#">Netherlands Entomological Society</a> (NEV)                                                              | Nature conservation  | Biodiversity: insects<br>Biodiversity: other invertebrates |                    |
| NL      | <a href="#">Reptile, Amphibian &amp; Fish Conservation the Netherlands</a> (RAVON)                                   | Nature conservation  | Biodiversity: reptiles, fish, amphibians                   |                    |
| NL      | <a href="#">RIKILT</a> , Institute for Food Safety                                                                   | Academic             | Biodiversity: general, Human health, Plant health          |                    |
| NL      | <a href="#">SOVON Bird Research Netherlands</a>                                                                      | Nature conservation  | Biodiversity: birds                                        |                    |
| NL      | University of Amsterdam: Dept. of Animal Ecology, Institute of Ecological Science, Faculty of Earth and Life Science | n.c.                 |                                                            |                    |
| NL      | Wageningen UR: Applied Plant Research                                                                                | Academic             | Sustainable Agriculture                                    | Agronomic practice |
| NL      | Wageningen UR: Plant Research International, <a href="#">Bijen@wur</a>                                               | Academic             | Biodiversity: insects, Sustainable agriculture             |                    |
| PL      | <a href="#">Institute of Nature Conservation</a> Polish Academy of Sciences in Krakow (IOP)                          | Academic             | Biodiversity: general                                      |                    |
| PL      | <a href="#">Mazowiecki Agricultural Advisory Centre in Warsaw</a> (MODR)                                             | Governmental         | Sustainable agriculture                                    | Agronomic practice |

| Country | Network Name translation (acronym)                                                                                                 | Type of organisation | Protection goals                       | Influencing factor |
|---------|------------------------------------------------------------------------------------------------------------------------------------|----------------------|----------------------------------------|--------------------|
| PL      | <a href="#">National Society for the Protection of Birds</a> (OTOP)                                                                | Nature conservation  | Biodiversity: birds                    |                    |
| PT      | <a href="#">Portuguese Environmental Agency. GMO register</a>                                                                      | Governmental         |                                        | GMO cultivation    |
| PT      | Biomedical Institute of Science                                                                                                    | n.c.                 |                                        |                    |
| PT      | Gulbenkian Institute of Science                                                                                                    | n.c.                 |                                        |                    |
| PT      | <a href="#">Iberian Myrmecology Association</a> (AIM)                                                                              | Nature conservation  | Biodiversity: insects                  |                    |
| PT      | Institute Dr Ricardo Jorge: research on Allergology and Immunology                                                                 | n.c.                 |                                        |                    |
| PT      | Institute of Biology Research and Technology (IBET)                                                                                | n.c.                 |                                        |                    |
| PT      | Ministry of Agriculture, Sea, Environment and Spatial Planning: <a href="#">Office of Planning and Policies</a> (GPP)              | Governmental         |                                        | Agronomic practice |
| PT      | National Institute of Biological Resources                                                                                         | n.c.                 |                                        |                    |
| PT      | <a href="#">National Water Institute</a>                                                                                           | Governmental         | Water quality                          |                    |
| PT      | Nutrition and Food University (FCNAUP)                                                                                             | n.c.                 |                                        |                    |
| PT      | <a href="#">Portuguese Agency for Food Quality</a> (ASAE)                                                                          | Governmental         | Human health, Animal health            |                    |
| PT      | Portuguese Conservation Tillage Association                                                                                        | n.c.                 |                                        |                    |
| PT      | Portuguese Food Industry Confederation (FIPA)                                                                                      | n.c.                 |                                        |                    |
| PT      | Portuguese Ministry of Environment                                                                                                 | n.c.                 |                                        |                    |
| PT      | Portuguese Ministry of Health                                                                                                      | n.c.                 |                                        |                    |
| PT      | <a href="#">Portuguese Ministry of Agriculture</a>                                                                                 | Governmental         | Soil function, Sustainable agriculture | Agronomic practice |
| PT      | <a href="#">Portuguese Society for the Study of Birds</a> (SPEA)                                                                   | Nature conservation  | Biodiversity: birds                    |                    |
| PT      | <a href="#">Public Enterprise for the Development of Alqueva</a> (EDIA)                                                            | Governmental         | Water quality                          |                    |
| PT      | Veterinary Sanitary Entity                                                                                                         | n.c.                 |                                        |                    |
| RO      | <a href="#">Academy for Agricultural and Forestry Sciences "Gheorghe-Ionescu Sisesti"</a> : Scientific Commission on Biotechnology | Academic             | Soil function, Sustainable agriculture | Agronomic practice |
| RO      | Association for Beekeepers in Romania                                                                                              | n.c.                 |                                        |                    |
| RO      | <a href="#">Institute for Beekeeping Research &amp; Development</a> (ICDA)                                                         | Professional         | Biodiversity: insects, Animal health   |                    |
| RO      | Ministry of Agriculture and Rural Development: Central Laboratory for Phyto-Sanitary Quarantine                                    | n.c.                 |                                        |                    |
| RO      | Ministry of Agriculture and Rural Development: Institute of Food Bio-Resources                                                     | n.c.                 |                                        |                    |
| RO      | Ministry of Agriculture and Rural Development: National                                                                            | n.c.                 |                                        |                    |

| Country | Network Name translation (acronym)                                                                                                                                        | Type of organisation | Protection goals                                     | Influencing factor                                                  |
|---------|---------------------------------------------------------------------------------------------------------------------------------------------------------------------------|----------------------|------------------------------------------------------|---------------------------------------------------------------------|
|         | Inspection for Seed Quality                                                                                                                                               |                      |                                                      |                                                                     |
| RO      | Ministry of Agriculture and Rural Development: Phyto-sanitary Directorate                                                                                                 | n.c.                 |                                                      |                                                                     |
| RO      | Ministry of Agriculture and Rural Development:<br><a href="#">GMO register</a><br><a href="#">State Inspection for Control of Genetically Modified Organisms (ISCOMG)</a> | Governmental         |                                                      | GMO cultivation                                                     |
| RO      | Ministry of Agriculture and Rural Development: State Institute for Variety Testing and Registration                                                                       | n.c.                 |                                                      |                                                                     |
| RO      | <a href="#">Ministry of Environment and Forestry: Environment Dept.</a>                                                                                                   | Governmental         | Water quality                                        | Other environmental conditions                                      |
| RO      | Ministry of Health: <a href="#">Public Health Institute</a> Bucharest                                                                                                     | Governmental         | Human health                                         |                                                                     |
| RO      | <a href="#">National Centre for Sustainable Development</a>                                                                                                               | Governmental         | Sustainable agriculture                              |                                                                     |
| RO      | <a href="#">National Environmental Protection Agency</a> - Directorate for Nature Conservation, Biodiversity, Ground, Underground                                         | Governmental         | Biodiversity: general                                | Agronomic practice, GMO cultivation, Other environmental conditions |
| RO      | National Federation of Agricultural Producers of Romania                                                                                                                  | n.c.                 |                                                      |                                                                     |
| RO      | National Cinegetical Association                                                                                                                                          | n.c.                 |                                                      |                                                                     |
| RO      | <a href="#">National Sanitary Veterinary and Food Safety Authority (ANSVSA)</a>                                                                                           | Governmental         | Animal health                                        | Agronomic practice, Plant protection                                |
| RO      | <a href="#">Natura 2000</a> NGO coalition Romania                                                                                                                         | Nature conservation  | Biodiversity: general                                |                                                                     |
| RO      | <a href="#">Research and Development Plant Protection Institute</a>                                                                                                       | Governmental         | Plant health                                         | Agronomic practice, Plant protection                                |
| RO      | <a href="#">Research Institute for Soil Science and Agrochemistry</a>                                                                                                     | Governmental         | Soil function, Sustainable agriculture               | Agronomic practice, Other environmental conditions                  |
| RO      | Romanian League of Agricultural Producer Associations                                                                                                                     | n.c.                 |                                                      |                                                                     |
| RO      | <a href="#">Romanian Ornithological Society (SOR)</a>                                                                                                                     | Nature conservation  | Biodiversity: birds                                  |                                                                     |
| RO      | University of Agricultural Sciences and Veterinary Medicine of Banat Timisoara                                                                                            | n.c.                 |                                                      |                                                                     |
| RO      | University of Agricultural Sciences and Veterinary Medicine, Bucharest                                                                                                    | n.c.                 |                                                      |                                                                     |
| SE      | <a href="#">BioSoM - Biological Soil Mapping</a>                                                                                                                          | Academic             | Plant health, Soil function, Sustainable agriculture | Plant protection                                                    |
| SE      | Lund University: <a href="#">The Swedish Bird Survey</a>                                                                                                                  | Academic             | Biodiversity: birds                                  |                                                                     |
| SE      | <a href="#">Swedish Environmental Protection Agency (EPA)</a>                                                                                                             | Governmental         | Biodiversity: general                                |                                                                     |

| Country | Network Name translation (acronym)                                                                                                                                 | Type of organisation | Protection goals                                                             | Influencing factor                   |
|---------|--------------------------------------------------------------------------------------------------------------------------------------------------------------------|----------------------|------------------------------------------------------------------------------|--------------------------------------|
| SE      | <a href="#">Swedish Ornithological Society</a> (SOF)                                                                                                               | Nature conservation  | Biodiversity: birds                                                          |                                      |
| SK      | <a href="#">Central Controlling and Testing Institute</a> : Agriculture Department of Feeds and Animal Nutrition                                                   | Governmental         | Animal health, Plant health, Sustainable agriculture                         | Agronomic practice                   |
| SK      | Centre of Animal Research: <a href="#">Apiculture Institute</a>                                                                                                    | Governmental         | Biodiversity: insects                                                        |                                      |
| SK      | <a href="#">Lepidopteran Society of Slovakia</a>                                                                                                                   | Nature conservation  | Biodiversity: butterflies                                                    |                                      |
| SK      | Ministry of Agriculture: <a href="#">GMO location registers</a>                                                                                                    | Governmental         |                                                                              | GMO cultivation                      |
| SK      | Slovak Academy of Sciences                                                                                                                                         | n.c.                 |                                                                              |                                      |
| SK      | <a href="#">Slovak Hydrometeorological Institute</a>                                                                                                               | Governmental         | Water quality                                                                | Other environmental conditions       |
| SK      | <a href="#">Slovak Ornithology Society</a>                                                                                                                         | Nature conservation  | Biodiversity: birds                                                          |                                      |
| SK      | <a href="#">State Nature Conservancy of Slovak Republic</a>                                                                                                        | Governmental         | Biodiversity: mammals, birds, insects                                        |                                      |
| UK      | <a href="#">British Crop Production Council</a> (BCPC): Pest / Weed Resistance Management                                                                          | Professional         |                                                                              | Agronomic practice, Plant protection |
| UK      | <a href="#">British Survey of Fertiliser Practice</a> (DEFRA)                                                                                                      | Governmental         |                                                                              | Agronomic practice                   |
| UK      | <a href="#">Butterfly Monitoring Scheme</a>                                                                                                                        | Nature conservation  | Biodiversity: butterflies                                                    |                                      |
| UK      | <a href="#">British trust for ornithology</a> (BTO)                                                                                                                | Nature conservation  | Biodiversity: birds                                                          |                                      |
| UK      | <a href="#">Centre for Ecology and Hydrology</a> (CEH)                                                                                                             | Academic             | Biodiversity: general                                                        | Other environmental conditions       |
| UK      | Chemicals Regulation Directorate (CRD) / Food Standards Agency (FSA): Pesticide Residue Surveillance                                                               | n.c.                 |                                                                              |                                      |
| UK      | Consent holder, merchant trade, processors / end-users: commercial evaluation                                                                                      | n.c.                 |                                                                              |                                      |
| UK      | Department for Environment, Food and Rural affairs (DEFRA)/Scottish Executive Environment and Rural Affairs Department (SEERAD) (NIAB / SAC); National List Trials | n.c.                 |                                                                              |                                      |
| UK      | Department for Environment, Food and Rural Affairs (DEFRA); <a href="#">farm practices survey</a>                                                                  | Governmental         |                                                                              | Agronomic practice                   |
| UK      | Department for Environment, Food and Rural Affairs (DEFRA); <a href="#">biodiversity indicators</a>                                                                | Governmental         | Biodiversity: general, Soil function, Water quality, Sustainable agriculture | Other environmental conditions       |
| UK      | Employers, Medical practitioners, HSE via Reporting of Injuries, Diseases & Dangerous Incidents Regulations 1995                                                   | n.c.                 |                                                                              |                                      |
| UK      | <a href="#">Environment Agency</a>                                                                                                                                 | Governmental         | Water quality                                                                | Other environmental conditions       |
| UK      | Environment Agency, Local Authority Environmental Health Departments: air quality                                                                                  | n.c.                 |                                                                              |                                      |

| Country | Network Name translation (acronym)                                                                                                                                  | Type of organisation | Protection goals        | Influencing factor                  |
|---------|---------------------------------------------------------------------------------------------------------------------------------------------------------------------|----------------------|-------------------------|-------------------------------------|
| UK      | Farmers / Agronomists associations                                                                                                                                  | n.c.                 |                         |                                     |
| UK      | GM-specific telephone hotline, Operated by consent-holder as per SCIMAC guidelines                                                                                  | n.c.                 |                         |                                     |
| UK      | Health and Safety Executive (HSE) / Chemicals Regulation Directorate (CRD): Pesticide Use / Health & Safety                                                         | n.c.                 |                         |                                     |
| UK      | Home Grown Cereals Authority (HGCA), Arable Research Centre (ARC), Morley, British Sugar, Maize Growers Association (MGA), British Society of Plant Breeders (BSPB) | n.c.                 |                         |                                     |
| UK      | National Institute for Agricultural Botany (NIAB): Variety Evaluation Trials                                                                                        | n.c.                 |                         |                                     |
| UK      | Scottish Agricultural Colleges (SAC)                                                                                                                                | n.c.                 |                         |                                     |
| UK      | <a href="#">Joint Nature Conservation Committee</a> (JNCC)                                                                                                          | Nature conservation  | Biodiversity: general   |                                     |
| UK      | <a href="#">Linking Environment and Farming</a> (LEAF): Farm Assurance Schemes                                                                                      | Professional         | Sustainable agriculture | Agronomic practice                  |
| UK      | Medical practitioners – collated by DoH & agencies <i>e.g.</i> PHLS, Public Health Observatories                                                                    | n.c.                 |                         |                                     |
| UK      | <a href="#">Meteorological Office</a>                                                                                                                               | Governmental         |                         | Other environmental conditions      |
| UK      | <a href="#">National Bee Unit</a> (NBU)                                                                                                                             | Governmental         | Biodiversity: insects   |                                     |
| UK      | <a href="#">National Biodiversity Network</a>                                                                                                                       | Nature conservation  | Biodiversity: general   |                                     |
| UK      | <a href="#">National Soil Resources Institute</a> (NSRI)                                                                                                            | Academic             | Soil function           |                                     |
| UK      | <a href="#">Natural England</a> (formerly English Nature)                                                                                                           | Nature conservation  | Biodiversity: general   | Other environmental conditions      |
| UK      | <a href="#">Pesticide Incidents Appraisal Panel</a> (PIAP) Chemical Regulation Directorate (CRD)                                                                    | Governmental         | Human health            |                                     |
| UK      | <a href="#">Defra Expert Committee on Pesticide Residues in Food</a> (PRiF) Pesticide Residues Committee (PRC) (DEFRA)                                              | Governmental         | Human health            |                                     |
| UK      | <a href="#">Red Tractor Farm Assurance Combinable Crops &amp; Sugar Beet Scheme</a> (formerly ACCS)                                                                 | Professional         | Sustainable agriculture | Agronomic practice                  |
| UK      | Research Institutes, Technology Providers, Distributors; herbicide research                                                                                         | n.c.                 |                         |                                     |
| UK      | <a href="#">Royal society for the protection of the birds</a> (RSPB)                                                                                                | Nature conservation  | Biodiversity: birds     |                                     |
| UK      | <a href="#">SCIMAC guidelines</a>                                                                                                                                   | Professional         |                         | Agronomic practice, GMO cultivation |
| UK      | Scottish Executive Environment and Rural Affairs Department                                                                                                         | n.c.                 |                         |                                     |

| Country | Network Name translation (acronym)                                                      | Type of organisation | Protection goals                                              | Influencing factor                  |
|---------|-----------------------------------------------------------------------------------------|----------------------|---------------------------------------------------------------|-------------------------------------|
|         | (SEERAD)                                                                                |                      |                                                               |                                     |
| UK      | <a href="#">Scottish Executive Environment Directorate</a> (SEED)                       | Governmental         | Biodiversity: general, Water quality, Sustainable agriculture | Agronomic practice, GMO cultivation |
| UK      | <a href="#">Scottish Natural Heritage</a> (SNH)                                         | Governmental         | Biodiversity: general                                         |                                     |
| UK      | The Food and Environment Research Agency (FERA): <a href="#">Pesticide Usage Survey</a> | Governmental         |                                                               | Plant protection                    |
| UK      | Water Service Companies, <a href="#">Drinking Water Inspectorate</a> (DWI)              | Governmental         | Water quality                                                 |                                     |
| UK      | <a href="#">Wildlife Incident Investigation Scheme</a> (WIIS)(HSE)                      | Governmental         | Animal health                                                 |                                     |

**Table 2. Description of the detailed information collected for each EEN having been retained as possibly suitable in GS**

| <b>Organisation</b>                             |                                                                                                                                                                                                                                                                                                                                                                                                                                                                                                                                                                                                                                                                                                                                                                                                                                                                                                                          |
|-------------------------------------------------|--------------------------------------------------------------------------------------------------------------------------------------------------------------------------------------------------------------------------------------------------------------------------------------------------------------------------------------------------------------------------------------------------------------------------------------------------------------------------------------------------------------------------------------------------------------------------------------------------------------------------------------------------------------------------------------------------------------------------------------------------------------------------------------------------------------------------------------------------------------------------------------------------------------------------|
| EuropaBio reference                             | An internal reference code for organisational purposes.                                                                                                                                                                                                                                                                                                                                                                                                                                                                                                                                                                                                                                                                                                                                                                                                                                                                  |
| Official name of the Network                    | The full legal name as registered, in some cases in a local language.                                                                                                                                                                                                                                                                                                                                                                                                                                                                                                                                                                                                                                                                                                                                                                                                                                                    |
| Other names                                     | Some EENs are known by other names, by abbreviations or as translation.                                                                                                                                                                                                                                                                                                                                                                                                                                                                                                                                                                                                                                                                                                                                                                                                                                                  |
| Type of organisation                            | Specification if the EEN is a governmental, academic, nature conservation or professional network.                                                                                                                                                                                                                                                                                                                                                                                                                                                                                                                                                                                                                                                                                                                                                                                                                       |
| Coordinates                                     | Contact details.                                                                                                                                                                                                                                                                                                                                                                                                                                                                                                                                                                                                                                                                                                                                                                                                                                                                                                         |
| Website                                         | Website address.                                                                                                                                                                                                                                                                                                                                                                                                                                                                                                                                                                                                                                                                                                                                                                                                                                                                                                         |
| Funding                                         | If known, sources of funding such as membership, grants, sponsoring.                                                                                                                                                                                                                                                                                                                                                                                                                                                                                                                                                                                                                                                                                                                                                                                                                                                     |
| Conflict of interest                            | Identifying if an EEN has a specific position on or organisational goal related to GMOs that could influence monitoring results.                                                                                                                                                                                                                                                                                                                                                                                                                                                                                                                                                                                                                                                                                                                                                                                         |
| Part of other network(s)                        | Indicating the relationship with other networks.                                                                                                                                                                                                                                                                                                                                                                                                                                                                                                                                                                                                                                                                                                                                                                                                                                                                         |
| Grouping of other network(s)                    | Indicating the relationship with other networks.                                                                                                                                                                                                                                                                                                                                                                                                                                                                                                                                                                                                                                                                                                                                                                                                                                                                         |
| <b>Monitoring Subject</b>                       |                                                                                                                                                                                                                                                                                                                                                                                                                                                                                                                                                                                                                                                                                                                                                                                                                                                                                                                          |
| Description                                     | Brief description of the objectives and activities of the EEN                                                                                                                                                                                                                                                                                                                                                                                                                                                                                                                                                                                                                                                                                                                                                                                                                                                            |
| Protection goal(s) and/or influencing factor(s) | <p>Indication of which protection goal(s) are addressed by the EEN. The following categories have been identified:</p> <ul style="list-style-type: none"> <li>- Biodiversity general or further specified as birds, mammals, fish, reptiles, amphibians, insects, butterflies, other invertebrates, plants and fungi)</li> <li>- Human health</li> <li>- Animal health</li> <li>- Plant health</li> <li>- Soil function</li> <li>- Water quality</li> <li>- Sustainable Agriculture</li> </ul> <p>In addition a number of EENs have been identified that could provide insights on influencing factors (those factors that may contribute to a change observed in one of the protection goal related endpoints). Influencing factors may be:</p> <ul style="list-style-type: none"> <li>- Agronomic practice</li> <li>- Plant protection</li> <li>- GMO cultivation</li> <li>- Other environmental conditions</li> </ul> |
| Duplication of Farmer questionnaire             | Indicating if the information is also captured by the farmer questionnaires.                                                                                                                                                                                                                                                                                                                                                                                                                                                                                                                                                                                                                                                                                                                                                                                                                                             |



| <b>Specificity</b>    |                                                                                                                                                                                                                                                                                                                                                                                                                                                                                                                                                                                                                                                                                                                                           |
|-----------------------|-------------------------------------------------------------------------------------------------------------------------------------------------------------------------------------------------------------------------------------------------------------------------------------------------------------------------------------------------------------------------------------------------------------------------------------------------------------------------------------------------------------------------------------------------------------------------------------------------------------------------------------------------------------------------------------------------------------------------------------------|
| Geography             | It is specified if the EEN reports information covering the EU, specific zone(s), specific MS(s), specific Region(s) or a local level. MS are listed according to the three geographical zones defined in Regulation (EC) No 1107/2009 on Plant Protection Products as areas where agricultural, plant health and environmental (including climatic) conditions are comparable:<br>- Zone A – North (Denmark, Estonia, Latvia, Lithuania, Finland and Sweden);<br>- Zone B – Centre (Belgium, Czech Republic, Germany, Ireland, Luxembourg, Hungary, the Netherlands, Austria, Poland, Romania, Slovenia, Slovakia and the United Kingdom); and<br>- Zone C – South (Bulgaria, Greece, Spain, France, Italy, Cyprus, Malta and Portugal). |
| Factors               | Identification of which parameters or subjects are monitored.                                                                                                                                                                                                                                                                                                                                                                                                                                                                                                                                                                                                                                                                             |
| Crop                  | Indication if the EEN is specific for a crop or for a group of crops ( <i>e.g.</i> cereals, leguminous crops).                                                                                                                                                                                                                                                                                                                                                                                                                                                                                                                                                                                                                            |
| Trait /treatment      | Indication if the EEN is specific for a specific trait ( <i>e.g.</i> herbicide resistance) or treatment ( <i>e.g.</i> pesticide application) as opposed to a general crop surveillance                                                                                                                                                                                                                                                                                                                                                                                                                                                                                                                                                    |
| GMO                   | Indicating if the EEN has established a specific bias towards GM crops. Most EEN activities pre-date the introduction of GM crops. <i>De facto</i> these are not having a focussed effort on GMO aspects.                                                                                                                                                                                                                                                                                                                                                                                                                                                                                                                                 |
| <b>Methodology</b>    |                                                                                                                                                                                                                                                                                                                                                                                                                                                                                                                                                                                                                                                                                                                                           |
| Observations          | Some EEN provide detailed scientific descriptions of the kind of observations they rely on and/or the methodology that they use. However, this is not always the case. Also, it is not always clear if the indicated methodology is scientifically justified for the purpose.                                                                                                                                                                                                                                                                                                                                                                                                                                                             |
| Frequency             | Observations can be made on an ad hoc basis or at regular intervals. These may range from several times in the year to once in a number of years.                                                                                                                                                                                                                                                                                                                                                                                                                                                                                                                                                                                         |
| Future                | Some initiatives ( <i>e.g.</i> projects) may have a limited time-frame. They can provide relevant information, but there is little prospect on being able to continue to use them in the future. Consequently, they may be less interesting when considering the analysis of trends over a longer period. The limited time expectation is only indicated when the network has a defined end date ( <i>e.g.</i> network supported by a grant). It can be of interest to consult back-issues of reports, next to the most recent report, in order to allow identification of long-term trends. In some cases, such historical analysis will not be possible.                                                                                |
| Quality of performers | Some networks rely on trained professionals for collecting information. Others rely on trained people, yet who engage on a non-professional basis. This is the case for many environmental observations relying on a large group of volunteers that may have a diversity of competencies but that receive instructions on observations from the EEN. In other cases, it is not clear or not specified who is involved.                                                                                                                                                                                                                                                                                                                    |
| Quality of data       | Some EENs use standardised ways for recording of raw data. In other cases, there are no instructions and raw data can be freely recorded, leading to diversity in observations. Finally in some cases, recording is done non-systematically and relies on anecdotic findings.                                                                                                                                                                                                                                                                                                                                                                                                                                                             |
| Analysis              | EENs analyse the data that they have obtained. It can range from reporting on occurrence of a species to advanced statistical analysis of evolution of abundance. In order to differentiate between relevant EENs, it is checked if the method used for the analysis is reported or not. In addition, it is checked if it the analysis can be verified or not.                                                                                                                                                                                                                                                                                                                                                                            |
| Quality of analysis   | An attempt is made to link the quality of the analysis to the possible conclusions.                                                                                                                                                                                                                                                                                                                                                                                                                                                                                                                                                                                                                                                       |
| <b>Reporting</b>      |                                                                                                                                                                                                                                                                                                                                                                                                                                                                                                                                                                                                                                                                                                                                           |
| Language              | Indication of the language that is used in communications of the EEN (website, reports, publications)                                                                                                                                                                                                                                                                                                                                                                                                                                                                                                                                                                                                                                     |
| Availability          | Indication of what type of reports and communications are available, including scientific publication, official report available on the internet or in other public forum, official report only available from network directly. In some cases, no reports are available.                                                                                                                                                                                                                                                                                                                                                                                                                                                                 |
| Frequency             | It is noted how many times (and also when) typically regular reports are issued.                                                                                                                                                                                                                                                                                                                                                                                                                                                                                                                                                                                                                                                          |

|                      |                                                                                                                                                                                                              |
|----------------------|--------------------------------------------------------------------------------------------------------------------------------------------------------------------------------------------------------------|
| Historical reference | It can be of interest to consult back-issues of reports, next to the most recent report, in order to allow identification of long-term trends. In some cases, such historical analysis will not be possible. |
| <b>Comment(s)</b>    |                                                                                                                                                                                                              |
| Comment(s)           | Non-structured notes on the network.                                                                                                                                                                         |

## Belgium

## GSEN-09-0043.00.2 BE – Natuurpunt

| EuropaBio's coordinated approach to General Surveillance: Existing Networks |                                                                                                                                                                                                                                                                                                                                                                                         |                                                                                                                                                                                                                                                                                                                                                                                                                                                                                                                              |                                                                                                                                                                                                                                                                                              |
|-----------------------------------------------------------------------------|-----------------------------------------------------------------------------------------------------------------------------------------------------------------------------------------------------------------------------------------------------------------------------------------------------------------------------------------------------------------------------------------|------------------------------------------------------------------------------------------------------------------------------------------------------------------------------------------------------------------------------------------------------------------------------------------------------------------------------------------------------------------------------------------------------------------------------------------------------------------------------------------------------------------------------|----------------------------------------------------------------------------------------------------------------------------------------------------------------------------------------------------------------------------------------------------------------------------------------------|
| <b>ORGANISATION</b>                                                         |                                                                                                                                                                                                                                                                                                                                                                                         |                                                                                                                                                                                                                                                                                                                                                                                                                                                                                                                              |                                                                                                                                                                                                                                                                                              |
| EuropaBio reference                                                         | GS-EN-09-0043                                                                                                                                                                                                                                                                                                                                                                           |                                                                                                                                                                                                                                                                                                                                                                                                                                                                                                                              |                                                                                                                                                                                                                                                                                              |
| Official name of the Network                                                | <b>Natuurpunt</b>                                                                                                                                                                                                                                                                                                                                                                       |                                                                                                                                                                                                                                                                                                                                                                                                                                                                                                                              |                                                                                                                                                                                                                                                                                              |
| Other names                                                                 |                                                                                                                                                                                                                                                                                                                                                                                         |                                                                                                                                                                                                                                                                                                                                                                                                                                                                                                                              |                                                                                                                                                                                                                                                                                              |
| Type of organisation                                                        | Nature conservation<br>Founded 1958                                                                                                                                                                                                                                                                                                                                                     |                                                                                                                                                                                                                                                                                                                                                                                                                                                                                                                              |                                                                                                                                                                                                                                                                                              |
| Coordinates                                                                 | Coxiestraat 11,<br>2800 Mechelen<br><br>fax: +32 15 42 49 21<br>Email: info[at]natuurpunt.be                                                                                                                                                                                                                                                                                            |                                                                                                                                                                                                                                                                                                                                                                                                                                                                                                                              |                                                                                                                                                                                                                                                                                              |
| Website                                                                     | <a href="http://www.natuurpunt.be">http://www.natuurpunt.be</a>                                                                                                                                                                                                                                                                                                                         |                                                                                                                                                                                                                                                                                                                                                                                                                                                                                                                              |                                                                                                                                                                                                                                                                                              |
| Funding                                                                     | Membership, donations, several Natura 2000 projects                                                                                                                                                                                                                                                                                                                                     |                                                                                                                                                                                                                                                                                                                                                                                                                                                                                                                              |                                                                                                                                                                                                                                                                                              |
| Conflict of interest                                                        | -                                                                                                                                                                                                                                                                                                                                                                                       |                                                                                                                                                                                                                                                                                                                                                                                                                                                                                                                              |                                                                                                                                                                                                                                                                                              |
| Part of other network(s)                                                    | BirdLife International                                                                                                                                                                                                                                                                                                                                                                  |                                                                                                                                                                                                                                                                                                                                                                                                                                                                                                                              |                                                                                                                                                                                                                                                                                              |
| Grouping other network(s)                                                   | Several specific workgroups                                                                                                                                                                                                                                                                                                                                                             |                                                                                                                                                                                                                                                                                                                                                                                                                                                                                                                              |                                                                                                                                                                                                                                                                                              |
| <b>MONITORING SUBJECT</b>                                                   |                                                                                                                                                                                                                                                                                                                                                                                         |                                                                                                                                                                                                                                                                                                                                                                                                                                                                                                                              |                                                                                                                                                                                                                                                                                              |
| Description                                                                 | Monitoring and collecting distribution data of diverse animals and plants                                                                                                                                                                                                                                                                                                               |                                                                                                                                                                                                                                                                                                                                                                                                                                                                                                                              |                                                                                                                                                                                                                                                                                              |
| Protection goal(s) and/or influencing factor(s)                             | <input checked="" type="checkbox"/> Protection goal                                                                                                                                                                                                                                                                                                                                     | <input type="checkbox"/> Influencing factor                                                                                                                                                                                                                                                                                                                                                                                                                                                                                  |                                                                                                                                                                                                                                                                                              |
|                                                                             | <input checked="" type="checkbox"/> Biodiversity: mammals, birds, amphibian, reptiles, invertebrates, fungi, plants<br><input type="checkbox"/> Human Health<br><input type="checkbox"/> Animal Health<br><input type="checkbox"/> Plant Health<br><input type="checkbox"/> Soil function<br><input type="checkbox"/> Water quality<br><input type="checkbox"/> Sustainable Agriculture | <input type="checkbox"/> Agronomic practice<br><input type="checkbox"/> Plant protection<br><input type="checkbox"/> GMO cultivation<br><input type="checkbox"/> Environmental conditions                                                                                                                                                                                                                                                                                                                                    |                                                                                                                                                                                                                                                                                              |
| Duplication of Farmer's questionnaire                                       | <input checked="" type="checkbox"/> No duplication<br><input type="checkbox"/> Partly duplication<br><input type="checkbox"/> Complete duplication                                                                                                                                                                                                                                      |                                                                                                                                                                                                                                                                                                                                                                                                                                                                                                                              |                                                                                                                                                                                                                                                                                              |
| <b>SPECIFICITY</b>                                                          |                                                                                                                                                                                                                                                                                                                                                                                         |                                                                                                                                                                                                                                                                                                                                                                                                                                                                                                                              |                                                                                                                                                                                                                                                                                              |
| Geography                                                                   | <input type="checkbox"/> EU -wide                                                                                                                                                                                                                                                                                                                                                       |                                                                                                                                                                                                                                                                                                                                                                                                                                                                                                                              |                                                                                                                                                                                                                                                                                              |
|                                                                             | <input type="checkbox"/> Zone A – North                                                                                                                                                                                                                                                                                                                                                 | <input checked="" type="checkbox"/> Zone B – Centre:                                                                                                                                                                                                                                                                                                                                                                                                                                                                         | <input type="checkbox"/> Zone C – South                                                                                                                                                                                                                                                      |
|                                                                             | <input type="checkbox"/> Denmark,<br><input type="checkbox"/> Estonia,<br><input type="checkbox"/> Latvia,<br><input type="checkbox"/> Lithuania,<br><input type="checkbox"/> Finland,<br><input type="checkbox"/> Sweden                                                                                                                                                               | <input checked="" type="checkbox"/> Belgium,<br><input type="checkbox"/> Czech Republic<br><input type="checkbox"/> Germany,<br><input type="checkbox"/> Ireland,<br><input type="checkbox"/> Luxembourg,<br><input type="checkbox"/> Hungary,<br><input type="checkbox"/> Netherlands,<br><input type="checkbox"/> Austria,<br><input type="checkbox"/> Poland,<br><input type="checkbox"/> Romania,<br><input type="checkbox"/> Slovenia,<br><input type="checkbox"/> Slovakia,<br><input type="checkbox"/> United Kingdom | <input type="checkbox"/> Bulgaria,<br><input type="checkbox"/> Greece,<br><input type="checkbox"/> Spain,<br><input type="checkbox"/> France,<br><input type="checkbox"/> Italy,<br><input type="checkbox"/> Cyprus,<br><input type="checkbox"/> Malta,<br><input type="checkbox"/> Portugal |
|                                                                             | <input checked="" type="checkbox"/> Regional (specify): Flanders<br><input type="checkbox"/> Local (specify)                                                                                                                                                                                                                                                                            |                                                                                                                                                                                                                                                                                                                                                                                                                                                                                                                              |                                                                                                                                                                                                                                                                                              |
| Factors                                                                     | <input checked="" type="checkbox"/> Multiple species/items (specify): mammals, birds, amphibian, reptiles, invertebrates, fungi, plants<br><input type="checkbox"/> Single species/item (specify)                                                                                                                                                                                       |                                                                                                                                                                                                                                                                                                                                                                                                                                                                                                                              |                                                                                                                                                                                                                                                                                              |
| Crop                                                                        | <input checked="" type="checkbox"/> No specific crop(s)<br><input type="checkbox"/> Several crops (e.g. all cereals)<br><input type="checkbox"/> Single crop                                                                                                                                                                                                                            |                                                                                                                                                                                                                                                                                                                                                                                                                                                                                                                              |                                                                                                                                                                                                                                                                                              |
| Trait /treatment                                                            | <input checked="" type="checkbox"/> No specific traits/treatments<br><input type="checkbox"/> Several traits/treatments<br><input type="checkbox"/> Single trait/treatment                                                                                                                                                                                                              |                                                                                                                                                                                                                                                                                                                                                                                                                                                                                                                              |                                                                                                                                                                                                                                                                                              |
| GMO                                                                         | <input checked="" type="checkbox"/> No GMO bias<br><input type="checkbox"/> GMO specific                                                                                                                                                                                                                                                                                                |                                                                                                                                                                                                                                                                                                                                                                                                                                                                                                                              |                                                                                                                                                                                                                                                                                              |
| <b>METHODOLOGY</b>                                                          |                                                                                                                                                                                                                                                                                                                                                                                         |                                                                                                                                                                                                                                                                                                                                                                                                                                                                                                                              |                                                                                                                                                                                                                                                                                              |

|                                                                                                                                                        |                                                                                                                                                                                                                                                                                   |
|--------------------------------------------------------------------------------------------------------------------------------------------------------|-----------------------------------------------------------------------------------------------------------------------------------------------------------------------------------------------------------------------------------------------------------------------------------|
| Observations                                                                                                                                           | <input checked="" type="checkbox"/> Reported, verifiable methodology<br><input type="checkbox"/> Reported, unverifiable methodology<br><input type="checkbox"/> Unknown, unverifiable methodology                                                                                 |
| Frequency                                                                                                                                              | <input checked="" type="checkbox"/> > 1 time/year<br><input type="checkbox"/> 1 time/year<br><input type="checkbox"/> < 1 time/year                                                                                                                                               |
| Future                                                                                                                                                 | <input checked="" type="checkbox"/> For $\geq$ 5 years<br><input type="checkbox"/> between 1 and 5 years<br><input type="checkbox"/> no prospect                                                                                                                                  |
| Quality of performers                                                                                                                                  | <input type="checkbox"/> Trained, professionals<br><input checked="" type="checkbox"/> Trained, non-professionals – training by documentation, volunteers<br><input type="checkbox"/> Uncertain or not -specified                                                                 |
| Quality of data                                                                                                                                        | <input checked="" type="checkbox"/> Standard recording of raw data<br><input type="checkbox"/> Free recording of raw data<br><input type="checkbox"/> Anecdotic                                                                                                                   |
| Analysis                                                                                                                                               | <input checked="" type="checkbox"/> Reported, verifiable methodology<br><input type="checkbox"/> Reported, unverifiable methodology<br><input type="checkbox"/> Unknown, unverifiable methodology                                                                                 |
| Quality of analysis                                                                                                                                    | <input checked="" type="checkbox"/> Scientifically based<br><input type="checkbox"/> Indicative only<br><input type="checkbox"/> Unknown                                                                                                                                          |
| <b>REPORTING</b>                                                                                                                                       |                                                                                                                                                                                                                                                                                   |
| Language                                                                                                                                               | Reporting language(s): Dutch                                                                                                                                                                                                                                                      |
| Availability                                                                                                                                           | <input type="checkbox"/> Scientific publication<br><input checked="" type="checkbox"/> Official report available on the internet or in other public forum<br><input checked="" type="checkbox"/> Official report available from network<br><input type="checkbox"/> Not available |
| Frequency                                                                                                                                              | <input checked="" type="checkbox"/> $\geq$ 1 time/year –Yearly reports<br><input type="checkbox"/> < 1 time/year – Reports per species or on local findings; distribution maps                                                                                                    |
| Historical reference                                                                                                                                   | <input checked="" type="checkbox"/> over $\geq$ 5 years<br><input type="checkbox"/> between 1 and 5 years<br><input type="checkbox"/> no historical analysis                                                                                                                      |
| <b>COMMENT(S)</b>                                                                                                                                      |                                                                                                                                                                                                                                                                                   |
| An established monitoring network using selected species as representative indicators and as protection goals. Not all species are covered every year. |                                                                                                                                                                                                                                                                                   |

## GSEN-09-0044.00.2 BE – Natagora

| EuropaBio's coordinated approach to General Surveillance: Existing Networks |                                                                                                                                                                                                                                                                                                                                                                                         |                                                                                                                                                                                                                                                                                                                                                                                                                                                                                                                              |                                                                                                                                                                                                                                                                                              |
|-----------------------------------------------------------------------------|-----------------------------------------------------------------------------------------------------------------------------------------------------------------------------------------------------------------------------------------------------------------------------------------------------------------------------------------------------------------------------------------|------------------------------------------------------------------------------------------------------------------------------------------------------------------------------------------------------------------------------------------------------------------------------------------------------------------------------------------------------------------------------------------------------------------------------------------------------------------------------------------------------------------------------|----------------------------------------------------------------------------------------------------------------------------------------------------------------------------------------------------------------------------------------------------------------------------------------------|
| <b>ORGANISATION</b>                                                         |                                                                                                                                                                                                                                                                                                                                                                                         |                                                                                                                                                                                                                                                                                                                                                                                                                                                                                                                              |                                                                                                                                                                                                                                                                                              |
| EuropaBio reference                                                         | GS-EN-09-0044                                                                                                                                                                                                                                                                                                                                                                           |                                                                                                                                                                                                                                                                                                                                                                                                                                                                                                                              |                                                                                                                                                                                                                                                                                              |
| Official name of the Network                                                | <b>Natagora</b>                                                                                                                                                                                                                                                                                                                                                                         |                                                                                                                                                                                                                                                                                                                                                                                                                                                                                                                              |                                                                                                                                                                                                                                                                                              |
| Other names                                                                 |                                                                                                                                                                                                                                                                                                                                                                                         |                                                                                                                                                                                                                                                                                                                                                                                                                                                                                                                              |                                                                                                                                                                                                                                                                                              |
| Type of organisation                                                        | Nature conservation<br>Founded 2004                                                                                                                                                                                                                                                                                                                                                     |                                                                                                                                                                                                                                                                                                                                                                                                                                                                                                                              |                                                                                                                                                                                                                                                                                              |
| Coordinates                                                                 | Rue du Wisconsin 3,<br>5000 Namur<br><br>Fax: +32 (0)81 830 571<br>Email: info[at]natagora.be                                                                                                                                                                                                                                                                                           |                                                                                                                                                                                                                                                                                                                                                                                                                                                                                                                              |                                                                                                                                                                                                                                                                                              |
| Website                                                                     | <a href="http://www.natagora.be">http://www.natagora.be</a>                                                                                                                                                                                                                                                                                                                             |                                                                                                                                                                                                                                                                                                                                                                                                                                                                                                                              |                                                                                                                                                                                                                                                                                              |
| Funding                                                                     | Subsidies Walloon region and Brussels Capital region, membership, donations                                                                                                                                                                                                                                                                                                             |                                                                                                                                                                                                                                                                                                                                                                                                                                                                                                                              |                                                                                                                                                                                                                                                                                              |
| Conflict of interest                                                        | -                                                                                                                                                                                                                                                                                                                                                                                       |                                                                                                                                                                                                                                                                                                                                                                                                                                                                                                                              |                                                                                                                                                                                                                                                                                              |
| Part of other network(s)                                                    | BirdLife International                                                                                                                                                                                                                                                                                                                                                                  |                                                                                                                                                                                                                                                                                                                                                                                                                                                                                                                              |                                                                                                                                                                                                                                                                                              |
| Grouping other network(s)                                                   | Several specific workgroups                                                                                                                                                                                                                                                                                                                                                             |                                                                                                                                                                                                                                                                                                                                                                                                                                                                                                                              |                                                                                                                                                                                                                                                                                              |
| <b>MONITORING SUBJECT</b>                                                   |                                                                                                                                                                                                                                                                                                                                                                                         |                                                                                                                                                                                                                                                                                                                                                                                                                                                                                                                              |                                                                                                                                                                                                                                                                                              |
| Description                                                                 | Monitoring and collecting distribution data of diverse animals and plants                                                                                                                                                                                                                                                                                                               |                                                                                                                                                                                                                                                                                                                                                                                                                                                                                                                              |                                                                                                                                                                                                                                                                                              |
| Protection goal(s) and/or influencing factor(s)                             | <input checked="" type="checkbox"/> Protection goal                                                                                                                                                                                                                                                                                                                                     | <input type="checkbox"/> Influencing factor                                                                                                                                                                                                                                                                                                                                                                                                                                                                                  |                                                                                                                                                                                                                                                                                              |
|                                                                             | <input checked="" type="checkbox"/> Biodiversity: mammals, birds, amphibian, reptiles, invertebrates, fungi, plants<br><input type="checkbox"/> Human Health<br><input type="checkbox"/> Animal Health<br><input type="checkbox"/> Plant Health<br><input type="checkbox"/> Soil function<br><input type="checkbox"/> Water quality<br><input type="checkbox"/> Sustainable Agriculture | <input type="checkbox"/> Agronomic practice<br><input type="checkbox"/> Plant protection<br><input type="checkbox"/> GMO cultivation<br><input type="checkbox"/> Environmental conditions                                                                                                                                                                                                                                                                                                                                    |                                                                                                                                                                                                                                                                                              |
| Duplication of Farmer's questionnaire                                       | <input checked="" type="checkbox"/> No duplication<br><input type="checkbox"/> Partly duplication<br><input type="checkbox"/> Complete duplication                                                                                                                                                                                                                                      |                                                                                                                                                                                                                                                                                                                                                                                                                                                                                                                              |                                                                                                                                                                                                                                                                                              |
| <b>SPECIFICITY</b>                                                          |                                                                                                                                                                                                                                                                                                                                                                                         |                                                                                                                                                                                                                                                                                                                                                                                                                                                                                                                              |                                                                                                                                                                                                                                                                                              |
| Geography                                                                   | <input type="checkbox"/> EU -wide                                                                                                                                                                                                                                                                                                                                                       |                                                                                                                                                                                                                                                                                                                                                                                                                                                                                                                              |                                                                                                                                                                                                                                                                                              |
|                                                                             | <input type="checkbox"/> Zone A – North                                                                                                                                                                                                                                                                                                                                                 | <input checked="" type="checkbox"/> Zone B – Centre:                                                                                                                                                                                                                                                                                                                                                                                                                                                                         | <input type="checkbox"/> Zone C – South                                                                                                                                                                                                                                                      |
|                                                                             | <input type="checkbox"/> Denmark,<br><input type="checkbox"/> Estonia,<br><input type="checkbox"/> Latvia,<br><input type="checkbox"/> Lithuania,<br><input type="checkbox"/> Finland,<br><input type="checkbox"/> Sweden                                                                                                                                                               | <input checked="" type="checkbox"/> Belgium,<br><input type="checkbox"/> Czech Republic<br><input type="checkbox"/> Germany,<br><input type="checkbox"/> Ireland,<br><input type="checkbox"/> Luxembourg,<br><input type="checkbox"/> Hungary,<br><input type="checkbox"/> Netherlands,<br><input type="checkbox"/> Austria,<br><input type="checkbox"/> Poland,<br><input type="checkbox"/> Romania,<br><input type="checkbox"/> Slovenia,<br><input type="checkbox"/> Slovakia,<br><input type="checkbox"/> United Kingdom | <input type="checkbox"/> Bulgaria,<br><input type="checkbox"/> Greece,<br><input type="checkbox"/> Spain,<br><input type="checkbox"/> France,<br><input type="checkbox"/> Italy,<br><input type="checkbox"/> Cyprus,<br><input type="checkbox"/> Malta,<br><input type="checkbox"/> Portugal |
|                                                                             | <input checked="" type="checkbox"/> Regional (specify): Wallonia & Brussels<br><input type="checkbox"/> Local (specify)                                                                                                                                                                                                                                                                 |                                                                                                                                                                                                                                                                                                                                                                                                                                                                                                                              |                                                                                                                                                                                                                                                                                              |
| Factors                                                                     | <input checked="" type="checkbox"/> Multiple species/items (specify): several species<br><input type="checkbox"/> Single species/item (specify)                                                                                                                                                                                                                                         |                                                                                                                                                                                                                                                                                                                                                                                                                                                                                                                              |                                                                                                                                                                                                                                                                                              |
| Crop                                                                        | <input checked="" type="checkbox"/> No specific crop(s)<br><input type="checkbox"/> Several crops (e.g. all cereals)<br><input type="checkbox"/> Single crop                                                                                                                                                                                                                            |                                                                                                                                                                                                                                                                                                                                                                                                                                                                                                                              |                                                                                                                                                                                                                                                                                              |
| Trait /treatment                                                            | <input checked="" type="checkbox"/> No specific traits/treatments<br><input type="checkbox"/> Several traits/treatments<br><input type="checkbox"/> Single trait/treatment                                                                                                                                                                                                              |                                                                                                                                                                                                                                                                                                                                                                                                                                                                                                                              |                                                                                                                                                                                                                                                                                              |
| GMO                                                                         | <input checked="" type="checkbox"/> No GMO bias<br><input type="checkbox"/> GMO specific                                                                                                                                                                                                                                                                                                |                                                                                                                                                                                                                                                                                                                                                                                                                                                                                                                              |                                                                                                                                                                                                                                                                                              |
| <b>METHODOLOGY</b>                                                          |                                                                                                                                                                                                                                                                                                                                                                                         |                                                                                                                                                                                                                                                                                                                                                                                                                                                                                                                              |                                                                                                                                                                                                                                                                                              |

|                                                                                                                                                                  |                                                                                                                                                                                                                                                                                   |
|------------------------------------------------------------------------------------------------------------------------------------------------------------------|-----------------------------------------------------------------------------------------------------------------------------------------------------------------------------------------------------------------------------------------------------------------------------------|
| Observations                                                                                                                                                     | <input checked="" type="checkbox"/> Reported, verifiable methodology<br><input type="checkbox"/> Reported, unverifiable methodology<br><input type="checkbox"/> Unknown, unverifiable methodology                                                                                 |
| Frequency                                                                                                                                                        | <input checked="" type="checkbox"/> > 1 time/year<br><input type="checkbox"/> 1 time/year<br><input type="checkbox"/> < 1 time/year                                                                                                                                               |
| Future                                                                                                                                                           | <input checked="" type="checkbox"/> For $\geq$ 5 years<br><input type="checkbox"/> between 1 and 5 years<br><input type="checkbox"/> no prospect                                                                                                                                  |
| Quality of performers                                                                                                                                            | <input type="checkbox"/> Trained, professionals<br><input checked="" type="checkbox"/> Trained, non-professionals – training by documentation, volunteers<br><input type="checkbox"/> Uncertain or not -specified                                                                 |
| Quality of data                                                                                                                                                  | <input checked="" type="checkbox"/> Standard recording of raw data<br><input type="checkbox"/> Free recording of raw data<br><input type="checkbox"/> Anecdotic                                                                                                                   |
| Analysis                                                                                                                                                         | <input checked="" type="checkbox"/> Reported, verifiable methodology<br><input type="checkbox"/> Reported, unverifiable methodology<br><input type="checkbox"/> Unknown, unverifiable methodology                                                                                 |
| Quality of analysis                                                                                                                                              | <input checked="" type="checkbox"/> Scientifically based<br><input type="checkbox"/> Indicative only<br><input type="checkbox"/> Unknown                                                                                                                                          |
| <b>REPORTING</b>                                                                                                                                                 |                                                                                                                                                                                                                                                                                   |
| Language                                                                                                                                                         | Reporting language(s): French                                                                                                                                                                                                                                                     |
| Availability                                                                                                                                                     | <input type="checkbox"/> Scientific publication<br><input checked="" type="checkbox"/> Official report available on the internet or in other public forum<br><input checked="" type="checkbox"/> Official report available from network<br><input type="checkbox"/> Not available |
| Frequency                                                                                                                                                        | <input checked="" type="checkbox"/> $\geq$ 1 time/year –Yearly reports<br><input type="checkbox"/> < 1 time/year – Reports per species or on local findings; distribution maps                                                                                                    |
| Historical reference                                                                                                                                             | <input type="checkbox"/> over $\geq$ 5 years<br><input checked="" type="checkbox"/> between 1 and 5 years<br><input type="checkbox"/> no historical analysis                                                                                                                      |
| <b>COMMENT(S)</b>                                                                                                                                                |                                                                                                                                                                                                                                                                                   |
| An established monitoring network using selected species as representative indicators and as protection goals. Information in many cases limited to subscribers. |                                                                                                                                                                                                                                                                                   |

## GSEN-09-0045.00.2 BE – Arabel

| EuropaBio's coordinated approach to General Surveillance: Existing Networks |                                                                                                                                                                                                                                                                                                                                                                                      |                                                                                                                                                                                                                                                                                                                                                                                                                                                                                                                              |                                                                                                                                                                                                                                                                                              |
|-----------------------------------------------------------------------------|--------------------------------------------------------------------------------------------------------------------------------------------------------------------------------------------------------------------------------------------------------------------------------------------------------------------------------------------------------------------------------------|------------------------------------------------------------------------------------------------------------------------------------------------------------------------------------------------------------------------------------------------------------------------------------------------------------------------------------------------------------------------------------------------------------------------------------------------------------------------------------------------------------------------------|----------------------------------------------------------------------------------------------------------------------------------------------------------------------------------------------------------------------------------------------------------------------------------------------|
| <b>ORGANISATION</b>                                                         |                                                                                                                                                                                                                                                                                                                                                                                      |                                                                                                                                                                                                                                                                                                                                                                                                                                                                                                                              |                                                                                                                                                                                                                                                                                              |
| EuropaBio reference                                                         | GS-EN-09-0045                                                                                                                                                                                                                                                                                                                                                                        |                                                                                                                                                                                                                                                                                                                                                                                                                                                                                                                              |                                                                                                                                                                                                                                                                                              |
| Official name of the Network                                                | <b>Arabel</b>                                                                                                                                                                                                                                                                                                                                                                        |                                                                                                                                                                                                                                                                                                                                                                                                                                                                                                                              |                                                                                                                                                                                                                                                                                              |
| Other names                                                                 | Belgische Arachnologische Vereniging<br>Société Arachnologique de Belgique                                                                                                                                                                                                                                                                                                           |                                                                                                                                                                                                                                                                                                                                                                                                                                                                                                                              |                                                                                                                                                                                                                                                                                              |
| Type of organisation                                                        | Nature conservation<br>Founded 1976                                                                                                                                                                                                                                                                                                                                                  |                                                                                                                                                                                                                                                                                                                                                                                                                                                                                                                              |                                                                                                                                                                                                                                                                                              |
| Coordinates                                                                 | Departement Entomologie, Koninklijk Belgisch Instituut voor Natuurwetenschappen<br>Vautierstraat 29<br>1000 Brussel                                                                                                                                                                                                                                                                  |                                                                                                                                                                                                                                                                                                                                                                                                                                                                                                                              |                                                                                                                                                                                                                                                                                              |
| Website                                                                     | <a href="http://www.arabel.be">http://www.arabel.be</a><br><a href="http://www.arabel.ugent.be/">http://www.arabel.ugent.be/</a>                                                                                                                                                                                                                                                     |                                                                                                                                                                                                                                                                                                                                                                                                                                                                                                                              |                                                                                                                                                                                                                                                                                              |
| Funding                                                                     | Membership                                                                                                                                                                                                                                                                                                                                                                           |                                                                                                                                                                                                                                                                                                                                                                                                                                                                                                                              |                                                                                                                                                                                                                                                                                              |
| Conflict of interest                                                        | -                                                                                                                                                                                                                                                                                                                                                                                    |                                                                                                                                                                                                                                                                                                                                                                                                                                                                                                                              |                                                                                                                                                                                                                                                                                              |
| Part of other network(s)                                                    |                                                                                                                                                                                                                                                                                                                                                                                      |                                                                                                                                                                                                                                                                                                                                                                                                                                                                                                                              |                                                                                                                                                                                                                                                                                              |
| Grouping other network(s)                                                   |                                                                                                                                                                                                                                                                                                                                                                                      |                                                                                                                                                                                                                                                                                                                                                                                                                                                                                                                              |                                                                                                                                                                                                                                                                                              |
| <b>MONITORING SUBJECT</b>                                                   |                                                                                                                                                                                                                                                                                                                                                                                      |                                                                                                                                                                                                                                                                                                                                                                                                                                                                                                                              |                                                                                                                                                                                                                                                                                              |
| Description                                                                 | Research information on spiders                                                                                                                                                                                                                                                                                                                                                      |                                                                                                                                                                                                                                                                                                                                                                                                                                                                                                                              |                                                                                                                                                                                                                                                                                              |
| Protection goal(s) and/or influencing factor(s)                             | <input checked="" type="checkbox"/> Protection goal<br><input checked="" type="checkbox"/> Biodiversity: spiders<br><input type="checkbox"/> Human Health<br><input type="checkbox"/> Animal Health<br><input type="checkbox"/> Plant Health<br><input type="checkbox"/> Soil function<br><input type="checkbox"/> Water quality<br><input type="checkbox"/> Sustainable Agriculture | <input type="checkbox"/> Influencing factor<br><input type="checkbox"/> Agronomic practice<br><input type="checkbox"/> Plant protection<br><input type="checkbox"/> GMO cultivation<br><input type="checkbox"/> Environmental conditions                                                                                                                                                                                                                                                                                     |                                                                                                                                                                                                                                                                                              |
| Duplication of Farmer's questionnaire                                       | <input checked="" type="checkbox"/> No duplication<br><input type="checkbox"/> Partly duplication<br><input type="checkbox"/> Complete duplication                                                                                                                                                                                                                                   |                                                                                                                                                                                                                                                                                                                                                                                                                                                                                                                              |                                                                                                                                                                                                                                                                                              |
| <b>SPECIFICITY</b>                                                          |                                                                                                                                                                                                                                                                                                                                                                                      |                                                                                                                                                                                                                                                                                                                                                                                                                                                                                                                              |                                                                                                                                                                                                                                                                                              |
| Geography                                                                   | <input type="checkbox"/> EU -wide<br><input type="checkbox"/> Zone A – North<br><input checked="" type="checkbox"/> Zone B – Centre:<br><input type="checkbox"/> Zone C – South                                                                                                                                                                                                      |                                                                                                                                                                                                                                                                                                                                                                                                                                                                                                                              |                                                                                                                                                                                                                                                                                              |
|                                                                             | <input type="checkbox"/> Denmark,<br><input type="checkbox"/> Estonia,<br><input type="checkbox"/> Latvia,<br><input type="checkbox"/> Lithuania,<br><input type="checkbox"/> Finland,<br><input type="checkbox"/> Sweden                                                                                                                                                            | <input checked="" type="checkbox"/> Belgium,<br><input type="checkbox"/> Czech Republic<br><input type="checkbox"/> Germany,<br><input type="checkbox"/> Ireland,<br><input type="checkbox"/> Luxembourg,<br><input type="checkbox"/> Hungary,<br><input type="checkbox"/> Netherlands,<br><input type="checkbox"/> Austria,<br><input type="checkbox"/> Poland,<br><input type="checkbox"/> Romania,<br><input type="checkbox"/> Slovenia,<br><input type="checkbox"/> Slovakia,<br><input type="checkbox"/> United Kingdom | <input type="checkbox"/> Bulgaria,<br><input type="checkbox"/> Greece,<br><input type="checkbox"/> Spain,<br><input type="checkbox"/> France,<br><input type="checkbox"/> Italy,<br><input type="checkbox"/> Cyprus,<br><input type="checkbox"/> Malta,<br><input type="checkbox"/> Portugal |
|                                                                             | <input type="checkbox"/> Regional (specify):<br><input type="checkbox"/> Local (specify)                                                                                                                                                                                                                                                                                             |                                                                                                                                                                                                                                                                                                                                                                                                                                                                                                                              |                                                                                                                                                                                                                                                                                              |
| Factors                                                                     | <input checked="" type="checkbox"/> Multiple species/items (specify): spiders<br><input type="checkbox"/> Single species/item (specify)                                                                                                                                                                                                                                              |                                                                                                                                                                                                                                                                                                                                                                                                                                                                                                                              |                                                                                                                                                                                                                                                                                              |
| Crop                                                                        | <input checked="" type="checkbox"/> No specific crop(s)<br><input type="checkbox"/> Several crops (e.g. all cereals)<br><input type="checkbox"/> Single crop                                                                                                                                                                                                                         |                                                                                                                                                                                                                                                                                                                                                                                                                                                                                                                              |                                                                                                                                                                                                                                                                                              |
| Trait /treatment                                                            | <input checked="" type="checkbox"/> No specific traits/treatments<br><input type="checkbox"/> Several traits/treatments<br><input type="checkbox"/> Single trait/treatment                                                                                                                                                                                                           |                                                                                                                                                                                                                                                                                                                                                                                                                                                                                                                              |                                                                                                                                                                                                                                                                                              |
| GMO                                                                         | <input checked="" type="checkbox"/> No GMO bias<br><input type="checkbox"/> GMO specific                                                                                                                                                                                                                                                                                             |                                                                                                                                                                                                                                                                                                                                                                                                                                                                                                                              |                                                                                                                                                                                                                                                                                              |
| <b>METHODOLOGY</b>                                                          |                                                                                                                                                                                                                                                                                                                                                                                      |                                                                                                                                                                                                                                                                                                                                                                                                                                                                                                                              |                                                                                                                                                                                                                                                                                              |
| Observations                                                                | <input type="checkbox"/> Reported, verifiable methodology                                                                                                                                                                                                                                                                                                                            |                                                                                                                                                                                                                                                                                                                                                                                                                                                                                                                              |                                                                                                                                                                                                                                                                                              |



|                                                                                                                                |                                                                                                                                                                                                                                                                        |
|--------------------------------------------------------------------------------------------------------------------------------|------------------------------------------------------------------------------------------------------------------------------------------------------------------------------------------------------------------------------------------------------------------------|
|                                                                                                                                | <input type="checkbox"/> Reported, unverifiable methodology<br><input type="checkbox"/> Unknown, unverifiable methodology                                                                                                                                              |
| Frequency                                                                                                                      | <input type="checkbox"/> > 1 time/year<br><input type="checkbox"/> 1 time/year<br><input type="checkbox"/> < 1 time/year                                                                                                                                               |
| Future                                                                                                                         | <input checked="" type="checkbox"/> For ≥ 5 years<br><input type="checkbox"/> between 1 and 5 years<br><input type="checkbox"/> no prospect                                                                                                                            |
| Quality of performers                                                                                                          | <input checked="" type="checkbox"/> Trained, professionals<br><input type="checkbox"/> Trained, non-professionals – training by documentation, volunteers<br><input type="checkbox"/> Uncertain or not -specified                                                      |
| Quality of data                                                                                                                | <input type="checkbox"/> Standard recording of raw data<br><input type="checkbox"/> Free recording of raw data<br><input type="checkbox"/> Anecdotic                                                                                                                   |
| Analysis                                                                                                                       | <input type="checkbox"/> Reported, verifiable methodology<br><input type="checkbox"/> Reported, unverifiable methodology<br><input type="checkbox"/> Unknown, unverifiable methodology                                                                                 |
| Quality of analysis                                                                                                            | <input type="checkbox"/> Scientifically based<br><input type="checkbox"/> Indicative only<br><input type="checkbox"/> Unknown                                                                                                                                          |
| <b>REPORTING</b>                                                                                                               |                                                                                                                                                                                                                                                                        |
| Language                                                                                                                       | Reporting language(s): Dutch/ French/English                                                                                                                                                                                                                           |
| Availability                                                                                                                   | <input checked="" type="checkbox"/> Scientific publication<br><input type="checkbox"/> Official report available on the internet or in other public forum<br><input type="checkbox"/> Official report available from network<br><input type="checkbox"/> Not available |
| Frequency                                                                                                                      | <input type="checkbox"/> ≥ 1 time/year<br><input type="checkbox"/> < 1 time/year                                                                                                                                                                                       |
| Historical reference                                                                                                           | <input checked="" type="checkbox"/> over ≥ 5 years<br><input type="checkbox"/> between 1 and 5 years<br><input type="checkbox"/> no historical analysis                                                                                                                |
| <b>COMMENT(S)</b>                                                                                                              |                                                                                                                                                                                                                                                                        |
| <b>Research on faunistic, ecological and taxonomic information. Spider distribution maps for Belgium and lists of species.</b> |                                                                                                                                                                                                                                                                        |

## GSEN-09-0047.00.2 BE – Bodemkundige Dienst

| EuropaBio's coordinated approach to General Surveillance: Existing Networks |                                                                                                                                                                                                                                                                                                                                          |                                                                                                                                                                                                                                                                                                                                                                                                                                                                                                                              |                                                                                                                                                                                                                                                                                              |
|-----------------------------------------------------------------------------|------------------------------------------------------------------------------------------------------------------------------------------------------------------------------------------------------------------------------------------------------------------------------------------------------------------------------------------|------------------------------------------------------------------------------------------------------------------------------------------------------------------------------------------------------------------------------------------------------------------------------------------------------------------------------------------------------------------------------------------------------------------------------------------------------------------------------------------------------------------------------|----------------------------------------------------------------------------------------------------------------------------------------------------------------------------------------------------------------------------------------------------------------------------------------------|
| <b>ORGANISATION</b>                                                         |                                                                                                                                                                                                                                                                                                                                          |                                                                                                                                                                                                                                                                                                                                                                                                                                                                                                                              |                                                                                                                                                                                                                                                                                              |
| EuropaBio reference                                                         | GS-EN-09-0047                                                                                                                                                                                                                                                                                                                            |                                                                                                                                                                                                                                                                                                                                                                                                                                                                                                                              |                                                                                                                                                                                                                                                                                              |
| Official name of the Network                                                | <b>Bodemkundige Dienst van België</b><br><b>Service Pédologique de Belgique</b>                                                                                                                                                                                                                                                          |                                                                                                                                                                                                                                                                                                                                                                                                                                                                                                                              |                                                                                                                                                                                                                                                                                              |
| Other names                                                                 | Soil Service of Belgium                                                                                                                                                                                                                                                                                                                  |                                                                                                                                                                                                                                                                                                                                                                                                                                                                                                                              |                                                                                                                                                                                                                                                                                              |
| Type of organisation                                                        | Academic<br>Founded 1946                                                                                                                                                                                                                                                                                                                 |                                                                                                                                                                                                                                                                                                                                                                                                                                                                                                                              |                                                                                                                                                                                                                                                                                              |
| Coordinates                                                                 | Willem de Croylaan 48<br>3001 LEUVEN-HEVERLEE<br><br>Fax: +32(0)16/22.42.06<br>Email: info[at]bdb.be                                                                                                                                                                                                                                     |                                                                                                                                                                                                                                                                                                                                                                                                                                                                                                                              |                                                                                                                                                                                                                                                                                              |
| Website                                                                     | <a href="http://www.bdb.be">http://www.bdb.be</a>                                                                                                                                                                                                                                                                                        |                                                                                                                                                                                                                                                                                                                                                                                                                                                                                                                              |                                                                                                                                                                                                                                                                                              |
| Funding                                                                     | Subsidies, services                                                                                                                                                                                                                                                                                                                      |                                                                                                                                                                                                                                                                                                                                                                                                                                                                                                                              |                                                                                                                                                                                                                                                                                              |
| Conflict of interest                                                        | -                                                                                                                                                                                                                                                                                                                                        |                                                                                                                                                                                                                                                                                                                                                                                                                                                                                                                              |                                                                                                                                                                                                                                                                                              |
| Part of other network(s)                                                    |                                                                                                                                                                                                                                                                                                                                          |                                                                                                                                                                                                                                                                                                                                                                                                                                                                                                                              |                                                                                                                                                                                                                                                                                              |
| Grouping other network(s)                                                   |                                                                                                                                                                                                                                                                                                                                          |                                                                                                                                                                                                                                                                                                                                                                                                                                                                                                                              |                                                                                                                                                                                                                                                                                              |
| <b>MONITORING SUBJECT</b>                                                   |                                                                                                                                                                                                                                                                                                                                          |                                                                                                                                                                                                                                                                                                                                                                                                                                                                                                                              |                                                                                                                                                                                                                                                                                              |
| Description                                                                 | Research information on spiders                                                                                                                                                                                                                                                                                                          |                                                                                                                                                                                                                                                                                                                                                                                                                                                                                                                              |                                                                                                                                                                                                                                                                                              |
| Protection goal(s) and/or influencing factor(s)                             | <input checked="" type="checkbox"/> Protection goal                                                                                                                                                                                                                                                                                      | <input checked="" type="checkbox"/> Influencing factor                                                                                                                                                                                                                                                                                                                                                                                                                                                                       |                                                                                                                                                                                                                                                                                              |
|                                                                             | <input type="checkbox"/> Biodiversity: spiders<br><input type="checkbox"/> Human Health<br><input type="checkbox"/> Animal Health<br><input type="checkbox"/> Plant Health<br><input checked="" type="checkbox"/> Soil function<br><input type="checkbox"/> Water quality<br><input checked="" type="checkbox"/> Sustainable Agriculture | <input type="checkbox"/> Agronomic practice<br><input type="checkbox"/> Plant protection<br><input type="checkbox"/> GMO cultivation<br><input checked="" type="checkbox"/> Environmental conditions                                                                                                                                                                                                                                                                                                                         |                                                                                                                                                                                                                                                                                              |
| Duplication of Farmer's questionnaire                                       | <input checked="" type="checkbox"/> No duplication<br><input type="checkbox"/> Partly duplication<br><input type="checkbox"/> Complete duplication                                                                                                                                                                                       |                                                                                                                                                                                                                                                                                                                                                                                                                                                                                                                              |                                                                                                                                                                                                                                                                                              |
| <b>SPECIFICITY</b>                                                          |                                                                                                                                                                                                                                                                                                                                          |                                                                                                                                                                                                                                                                                                                                                                                                                                                                                                                              |                                                                                                                                                                                                                                                                                              |
| Geography                                                                   | <input type="checkbox"/> EU -wide                                                                                                                                                                                                                                                                                                        |                                                                                                                                                                                                                                                                                                                                                                                                                                                                                                                              |                                                                                                                                                                                                                                                                                              |
|                                                                             | <input type="checkbox"/> Zone A – North                                                                                                                                                                                                                                                                                                  | <input checked="" type="checkbox"/> Zone B – Centre:                                                                                                                                                                                                                                                                                                                                                                                                                                                                         | <input type="checkbox"/> Zone C – South                                                                                                                                                                                                                                                      |
|                                                                             | <input type="checkbox"/> Denmark,<br><input type="checkbox"/> Estonia,<br><input type="checkbox"/> Latvia,<br><input type="checkbox"/> Lithuania,<br><input type="checkbox"/> Finland,<br><input type="checkbox"/> Sweden                                                                                                                | <input checked="" type="checkbox"/> Belgium,<br><input type="checkbox"/> Czech Republic<br><input type="checkbox"/> Germany,<br><input type="checkbox"/> Ireland,<br><input type="checkbox"/> Luxembourg,<br><input type="checkbox"/> Hungary,<br><input type="checkbox"/> Netherlands,<br><input type="checkbox"/> Austria,<br><input type="checkbox"/> Poland,<br><input type="checkbox"/> Romania,<br><input type="checkbox"/> Slovenia,<br><input type="checkbox"/> Slovakia,<br><input type="checkbox"/> United Kingdom | <input type="checkbox"/> Bulgaria,<br><input type="checkbox"/> Greece,<br><input type="checkbox"/> Spain,<br><input type="checkbox"/> France,<br><input type="checkbox"/> Italy,<br><input type="checkbox"/> Cyprus,<br><input type="checkbox"/> Malta,<br><input type="checkbox"/> Portugal |
|                                                                             | <input type="checkbox"/> Regional (specify):<br><input type="checkbox"/> Local (specify)                                                                                                                                                                                                                                                 |                                                                                                                                                                                                                                                                                                                                                                                                                                                                                                                              |                                                                                                                                                                                                                                                                                              |
| Factors                                                                     | <input checked="" type="checkbox"/> Multiple species/items (specify): soil parameters<br><input type="checkbox"/> Single species/item (specify)                                                                                                                                                                                          |                                                                                                                                                                                                                                                                                                                                                                                                                                                                                                                              |                                                                                                                                                                                                                                                                                              |
| Crop                                                                        | <input checked="" type="checkbox"/> No specific crop(s)<br><input type="checkbox"/> Several crops (e.g. all cereals)<br><input type="checkbox"/> Single crop                                                                                                                                                                             |                                                                                                                                                                                                                                                                                                                                                                                                                                                                                                                              |                                                                                                                                                                                                                                                                                              |
| Trait /treatment                                                            | <input checked="" type="checkbox"/> No specific traits/treatments<br><input type="checkbox"/> Several traits/treatments<br><input type="checkbox"/> Single trait/treatment                                                                                                                                                               |                                                                                                                                                                                                                                                                                                                                                                                                                                                                                                                              |                                                                                                                                                                                                                                                                                              |
| GMO                                                                         | <input checked="" type="checkbox"/> No GMO bias<br><input type="checkbox"/> GMO specific                                                                                                                                                                                                                                                 |                                                                                                                                                                                                                                                                                                                                                                                                                                                                                                                              |                                                                                                                                                                                                                                                                                              |
| <b>METHODOLOGY</b>                                                          |                                                                                                                                                                                                                                                                                                                                          |                                                                                                                                                                                                                                                                                                                                                                                                                                                                                                                              |                                                                                                                                                                                                                                                                                              |

|                                                                                        |                                                                                                                                                                                                                                                                        |
|----------------------------------------------------------------------------------------|------------------------------------------------------------------------------------------------------------------------------------------------------------------------------------------------------------------------------------------------------------------------|
| Observations                                                                           | <input type="checkbox"/> Reported, verifiable methodology<br><input type="checkbox"/> Reported, unverifiable methodology<br><input type="checkbox"/> Unknown, unverifiable methodology                                                                                 |
| Frequency                                                                              | <input type="checkbox"/> > 1 time/year<br><input type="checkbox"/> 1 time/year<br><input checked="" type="checkbox"/> < 1 time/year                                                                                                                                    |
| Future                                                                                 | <input checked="" type="checkbox"/> For $\geq 5$ years<br><input type="checkbox"/> between 1 and 5 years<br><input type="checkbox"/> no prospect                                                                                                                       |
| Quality of performers                                                                  | <input checked="" type="checkbox"/> Trained, professionals<br><input type="checkbox"/> Trained, non-professionals – training by documentation, volunteers<br><input type="checkbox"/> Uncertain or not -specified                                                      |
| Quality of data                                                                        | <input type="checkbox"/> Standard recording of raw data<br><input type="checkbox"/> Free recording of raw data<br><input type="checkbox"/> Anecdotic                                                                                                                   |
| Analysis                                                                               | <input type="checkbox"/> Reported, verifiable methodology<br><input type="checkbox"/> Reported, unverifiable methodology<br><input type="checkbox"/> Unknown, unverifiable methodology                                                                                 |
| Quality of analysis                                                                    | <input type="checkbox"/> Scientifically based<br><input type="checkbox"/> Indicative only<br><input type="checkbox"/> Unknown                                                                                                                                          |
| <b>REPORTING</b>                                                                       |                                                                                                                                                                                                                                                                        |
| Language                                                                               | Reporting language(s): Dutch/ French/English                                                                                                                                                                                                                           |
| Availability                                                                           | <input checked="" type="checkbox"/> Scientific publication<br><input type="checkbox"/> Official report available on the internet or in other public forum<br><input type="checkbox"/> Official report available from network<br><input type="checkbox"/> Not available |
| Frequency                                                                              | <input type="checkbox"/> $\geq 1$ time/year<br><input type="checkbox"/> < 1 time/year                                                                                                                                                                                  |
| Historical reference                                                                   | <input checked="" type="checkbox"/> over $\geq 5$ years<br><input type="checkbox"/> between 1 and 5 years<br><input type="checkbox"/> no historical analysis                                                                                                           |
| <b>COMMENT(S)</b>                                                                      |                                                                                                                                                                                                                                                                        |
| Monitoring soil condition. Soil fertilization research every 4 years (book published). |                                                                                                                                                                                                                                                                        |

**GSEN-09-0157.00.1 BE – INBO**

| <b>EuropaBio's coordinated approach to General Surveillance: Existing Networks</b> |                                                                                                                                                                                                                                                                                                                                                                                                                |                                                                                                                                                                                                                                                                                                                                                                                                                                                                                                                              |                                                                                                                                                                                                                                                                                              |
|------------------------------------------------------------------------------------|----------------------------------------------------------------------------------------------------------------------------------------------------------------------------------------------------------------------------------------------------------------------------------------------------------------------------------------------------------------------------------------------------------------|------------------------------------------------------------------------------------------------------------------------------------------------------------------------------------------------------------------------------------------------------------------------------------------------------------------------------------------------------------------------------------------------------------------------------------------------------------------------------------------------------------------------------|----------------------------------------------------------------------------------------------------------------------------------------------------------------------------------------------------------------------------------------------------------------------------------------------|
| <b>ORGANISATION</b>                                                                |                                                                                                                                                                                                                                                                                                                                                                                                                |                                                                                                                                                                                                                                                                                                                                                                                                                                                                                                                              |                                                                                                                                                                                                                                                                                              |
| EuropaBio reference                                                                | GS-EN-09-0157                                                                                                                                                                                                                                                                                                                                                                                                  |                                                                                                                                                                                                                                                                                                                                                                                                                                                                                                                              |                                                                                                                                                                                                                                                                                              |
| Official name of the Network                                                       | <b>Instituut voor Natuur- en Bosonderzoek (INBO)</b><br>Wetenschappelijke instelling van de Vlaamse Overheid                                                                                                                                                                                                                                                                                                   |                                                                                                                                                                                                                                                                                                                                                                                                                                                                                                                              |                                                                                                                                                                                                                                                                                              |
| Other names                                                                        | Research Institute for Nature and Forest; Scientific Institute of the Flemish Government                                                                                                                                                                                                                                                                                                                       |                                                                                                                                                                                                                                                                                                                                                                                                                                                                                                                              |                                                                                                                                                                                                                                                                                              |
| Type of organisation                                                               | Governmental<br>Founded (unknown)                                                                                                                                                                                                                                                                                                                                                                              |                                                                                                                                                                                                                                                                                                                                                                                                                                                                                                                              |                                                                                                                                                                                                                                                                                              |
| Coordinates                                                                        | Kliniekstraat 25<br>1070 Brussel<br><br>fax: 02 558 18 05<br>Email: info[at]inbo.be                                                                                                                                                                                                                                                                                                                            |                                                                                                                                                                                                                                                                                                                                                                                                                                                                                                                              |                                                                                                                                                                                                                                                                                              |
| Website                                                                            | <a href="http://www.inbo.be">http://www.inbo.be</a>                                                                                                                                                                                                                                                                                                                                                            |                                                                                                                                                                                                                                                                                                                                                                                                                                                                                                                              |                                                                                                                                                                                                                                                                                              |
| Funding                                                                            |                                                                                                                                                                                                                                                                                                                                                                                                                |                                                                                                                                                                                                                                                                                                                                                                                                                                                                                                                              |                                                                                                                                                                                                                                                                                              |
| Conflict of interest                                                               |                                                                                                                                                                                                                                                                                                                                                                                                                |                                                                                                                                                                                                                                                                                                                                                                                                                                                                                                                              |                                                                                                                                                                                                                                                                                              |
| Part of other network(s)                                                           |                                                                                                                                                                                                                                                                                                                                                                                                                |                                                                                                                                                                                                                                                                                                                                                                                                                                                                                                                              |                                                                                                                                                                                                                                                                                              |
| Grouping other network(s)                                                          |                                                                                                                                                                                                                                                                                                                                                                                                                |                                                                                                                                                                                                                                                                                                                                                                                                                                                                                                                              |                                                                                                                                                                                                                                                                                              |
| <b>MONITORING SUBJECT</b>                                                          |                                                                                                                                                                                                                                                                                                                                                                                                                |                                                                                                                                                                                                                                                                                                                                                                                                                                                                                                                              |                                                                                                                                                                                                                                                                                              |
| Description                                                                        | Research, advising and reporting on the status of nature and evaluation of nature management                                                                                                                                                                                                                                                                                                                   |                                                                                                                                                                                                                                                                                                                                                                                                                                                                                                                              |                                                                                                                                                                                                                                                                                              |
| Protection goal(s) and/or influencing factor(s)                                    | <input checked="" type="checkbox"/> Protection goal<br><br><input checked="" type="checkbox"/> Biodiversity: general<br><input type="checkbox"/> Human Health<br><input type="checkbox"/> Animal Health<br><input type="checkbox"/> Plant Health<br><input checked="" type="checkbox"/> Soil function<br><input checked="" type="checkbox"/> Water quality<br><input type="checkbox"/> Sustainable Agriculture | <input type="checkbox"/> Influencing factor<br><br><input type="checkbox"/> Agronomic practice<br><input type="checkbox"/> Plant protection<br><input type="checkbox"/> GMO cultivation<br><input type="checkbox"/> Environmental conditions                                                                                                                                                                                                                                                                                 |                                                                                                                                                                                                                                                                                              |
| Duplication of Farmer's questionnaire                                              | <input checked="" type="checkbox"/> No duplication<br><input type="checkbox"/> Partly duplication<br><input type="checkbox"/> Complete duplication                                                                                                                                                                                                                                                             |                                                                                                                                                                                                                                                                                                                                                                                                                                                                                                                              |                                                                                                                                                                                                                                                                                              |
| <b>SPECIFICITY</b>                                                                 |                                                                                                                                                                                                                                                                                                                                                                                                                |                                                                                                                                                                                                                                                                                                                                                                                                                                                                                                                              |                                                                                                                                                                                                                                                                                              |
| Geography                                                                          | <input type="checkbox"/> EU -wide                                                                                                                                                                                                                                                                                                                                                                              |                                                                                                                                                                                                                                                                                                                                                                                                                                                                                                                              |                                                                                                                                                                                                                                                                                              |
|                                                                                    | <input type="checkbox"/> Zone A – North                                                                                                                                                                                                                                                                                                                                                                        | <input checked="" type="checkbox"/> Zone B – Centre:                                                                                                                                                                                                                                                                                                                                                                                                                                                                         | <input type="checkbox"/> Zone C – South                                                                                                                                                                                                                                                      |
|                                                                                    | <input type="checkbox"/> Denmark,<br><input type="checkbox"/> Estonia,<br><input type="checkbox"/> Latvia,<br><input type="checkbox"/> Lithuania,<br><input type="checkbox"/> Finland,<br><input type="checkbox"/> Sweden                                                                                                                                                                                      | <input checked="" type="checkbox"/> Belgium,<br><input type="checkbox"/> Czech Republic<br><input type="checkbox"/> Germany,<br><input type="checkbox"/> Ireland,<br><input type="checkbox"/> Luxembourg,<br><input type="checkbox"/> Hungary,<br><input type="checkbox"/> Netherlands,<br><input type="checkbox"/> Austria,<br><input type="checkbox"/> Poland,<br><input type="checkbox"/> Romania,<br><input type="checkbox"/> Slovenia,<br><input type="checkbox"/> Slovakia,<br><input type="checkbox"/> United Kingdom | <input type="checkbox"/> Bulgaria,<br><input type="checkbox"/> Greece,<br><input type="checkbox"/> Spain,<br><input type="checkbox"/> France,<br><input type="checkbox"/> Italy,<br><input type="checkbox"/> Cyprus,<br><input type="checkbox"/> Malta,<br><input type="checkbox"/> Portugal |
|                                                                                    | <input checked="" type="checkbox"/> Regional (specify): Flanders<br><input type="checkbox"/> Local (specify)                                                                                                                                                                                                                                                                                                   |                                                                                                                                                                                                                                                                                                                                                                                                                                                                                                                              |                                                                                                                                                                                                                                                                                              |
| Factors                                                                            | <input checked="" type="checkbox"/> Multiple species/items (specify) plants and animals<br><input type="checkbox"/> Single species/item (specify)                                                                                                                                                                                                                                                              |                                                                                                                                                                                                                                                                                                                                                                                                                                                                                                                              |                                                                                                                                                                                                                                                                                              |
| Crop                                                                               | <input checked="" type="checkbox"/> No specific crop(s)<br><input type="checkbox"/> Several crops (e.g. all cereals)<br><input type="checkbox"/> Single crop                                                                                                                                                                                                                                                   |                                                                                                                                                                                                                                                                                                                                                                                                                                                                                                                              |                                                                                                                                                                                                                                                                                              |
| Trait /treatment                                                                   | <input checked="" type="checkbox"/> No specific traits/treatments<br><input type="checkbox"/> Several traits/treatments<br><input type="checkbox"/> Single trait/treatment                                                                                                                                                                                                                                     |                                                                                                                                                                                                                                                                                                                                                                                                                                                                                                                              |                                                                                                                                                                                                                                                                                              |
| GMO                                                                                | <input checked="" type="checkbox"/> No GMO bias<br><input type="checkbox"/> GMO specific                                                                                                                                                                                                                                                                                                                       |                                                                                                                                                                                                                                                                                                                                                                                                                                                                                                                              |                                                                                                                                                                                                                                                                                              |
| <b>METHODOLOGY</b>                                                                 |                                                                                                                                                                                                                                                                                                                                                                                                                |                                                                                                                                                                                                                                                                                                                                                                                                                                                                                                                              |                                                                                                                                                                                                                                                                                              |

|                                                                                                             |                                                                                                                                                                                                                                                                                   |
|-------------------------------------------------------------------------------------------------------------|-----------------------------------------------------------------------------------------------------------------------------------------------------------------------------------------------------------------------------------------------------------------------------------|
| Observations                                                                                                | <input checked="" type="checkbox"/> Reported, verifiable methodology<br><input type="checkbox"/> Reported, unverifiable methodology<br><input type="checkbox"/> Unknown, unverifiable methodology                                                                                 |
| Frequency                                                                                                   | <input checked="" type="checkbox"/> > 1 time/year<br><input type="checkbox"/> 1 time/year<br><input type="checkbox"/> < 1 time/year                                                                                                                                               |
| Future                                                                                                      | <input checked="" type="checkbox"/> For ≥ 5 years<br><input type="checkbox"/> between 1 and 5 years<br><input type="checkbox"/> no prospect                                                                                                                                       |
| Quality of performers                                                                                       | <input checked="" type="checkbox"/> Trained, professionals<br><input checked="" type="checkbox"/> Trained, non-professionals – training by documentation, volunteers<br><input type="checkbox"/> Uncertain or not -specified                                                      |
| Quality of data                                                                                             | <input checked="" type="checkbox"/> Standard recording of raw data<br><input type="checkbox"/> Free recording of raw data<br><input type="checkbox"/> Anecdotic                                                                                                                   |
| Analysis                                                                                                    | <input checked="" type="checkbox"/> Reported, verifiable methodology<br><input type="checkbox"/> Reported, unverifiable methodology<br><input type="checkbox"/> Unknown, unverifiable methodology                                                                                 |
| Quality of analysis                                                                                         | <input checked="" type="checkbox"/> Scientifically based<br><input type="checkbox"/> Indicative only<br><input type="checkbox"/> Unknown                                                                                                                                          |
| <b>REPORTING</b>                                                                                            |                                                                                                                                                                                                                                                                                   |
| Language                                                                                                    | Reporting language(s): Dutch / English                                                                                                                                                                                                                                            |
| Availability                                                                                                | <input checked="" type="checkbox"/> Scientific publication<br><input checked="" type="checkbox"/> Official report available on the internet or in other public forum<br><input type="checkbox"/> Official report available from network<br><input type="checkbox"/> Not available |
| Frequency                                                                                                   | <input checked="" type="checkbox"/> ≥ 1 time/year – scientific publications, PhD studies<br><input type="checkbox"/> < 1 time/year – biannual 'nature report'                                                                                                                     |
| Historical reference                                                                                        | <input checked="" type="checkbox"/> over ≥ 5 years<br><input type="checkbox"/> between 1 and 5 years<br><input type="checkbox"/> no historical analysis                                                                                                                           |
| <b>COMMENT(S)</b>                                                                                           |                                                                                                                                                                                                                                                                                   |
| Monitoring activities focusing on woodland and grassland and management of these using specific indicators. |                                                                                                                                                                                                                                                                                   |

**GSEN-09-0194.00.1 BE – GIREA**

| <b>EuropaBio's coordinated approach to General Surveillance: Existing Networks</b> |                                                                                                                                                                                                                                                                                                                                                                                                                                                                                                                                                                                      |                                                                                                                                                                                                                                                                                                                                         |  |
|------------------------------------------------------------------------------------|--------------------------------------------------------------------------------------------------------------------------------------------------------------------------------------------------------------------------------------------------------------------------------------------------------------------------------------------------------------------------------------------------------------------------------------------------------------------------------------------------------------------------------------------------------------------------------------|-----------------------------------------------------------------------------------------------------------------------------------------------------------------------------------------------------------------------------------------------------------------------------------------------------------------------------------------|--|
| <b>ORGANISATION</b>                                                                |                                                                                                                                                                                                                                                                                                                                                                                                                                                                                                                                                                                      |                                                                                                                                                                                                                                                                                                                                         |  |
| EuropaBio reference                                                                | GS-EN-09-0194                                                                                                                                                                                                                                                                                                                                                                                                                                                                                                                                                                        |                                                                                                                                                                                                                                                                                                                                         |  |
| Official name of the Network                                                       | <b>Groupe Interuniversitaire de Recherches en Écologie Appliquée</b>                                                                                                                                                                                                                                                                                                                                                                                                                                                                                                                 |                                                                                                                                                                                                                                                                                                                                         |  |
| Other names                                                                        | Interuniversity Group on Applied Ecological Research, GIREA                                                                                                                                                                                                                                                                                                                                                                                                                                                                                                                          |                                                                                                                                                                                                                                                                                                                                         |  |
| Type of organisation                                                               | Academic<br>Founded 1976                                                                                                                                                                                                                                                                                                                                                                                                                                                                                                                                                             |                                                                                                                                                                                                                                                                                                                                         |  |
| Coordinates                                                                        | GIREA Namur<br>61, rue de Bruxelles<br>5000 Namur<br><br>Email : <a href="mailto:girea[at]fundp.ac.be">girea[at]fundp.ac.be</a>                                                                                                                                                                                                                                                                                                                                                                                                                                                      |                                                                                                                                                                                                                                                                                                                                         |  |
| Website                                                                            | <a href="http://www.bionat.ulg.ac.be/index.php?mn=3&amp;pg=39">http://www.bionat.ulg.ac.be/index.php?mn=3&amp;pg=39</a><br><a href="http://www.bionat.ulg.ac.be/">http://www.bionat.ulg.ac.be/</a>                                                                                                                                                                                                                                                                                                                                                                                   |                                                                                                                                                                                                                                                                                                                                         |  |
| Funding                                                                            |                                                                                                                                                                                                                                                                                                                                                                                                                                                                                                                                                                                      |                                                                                                                                                                                                                                                                                                                                         |  |
| Conflict of interest                                                               | -                                                                                                                                                                                                                                                                                                                                                                                                                                                                                                                                                                                    |                                                                                                                                                                                                                                                                                                                                         |  |
| Part of other network(s)                                                           |                                                                                                                                                                                                                                                                                                                                                                                                                                                                                                                                                                                      |                                                                                                                                                                                                                                                                                                                                         |  |
| Grouping other network(s)                                                          | Several research groups in different universities and scientific institutes in Brussels and Wallonia                                                                                                                                                                                                                                                                                                                                                                                                                                                                                 |                                                                                                                                                                                                                                                                                                                                         |  |
| <b>MONITORING SUBJECT</b>                                                          |                                                                                                                                                                                                                                                                                                                                                                                                                                                                                                                                                                                      |                                                                                                                                                                                                                                                                                                                                         |  |
| Description                                                                        | Developing methodologies for assessment and environmental management.<br>Research on ecology of flora and fauna, conservation and management; sustainable agriculture: "programme agri-environnemental wallon"                                                                                                                                                                                                                                                                                                                                                                       |                                                                                                                                                                                                                                                                                                                                         |  |
| Protection goal(s) and/or influencing factor(s)                                    | <input checked="" type="checkbox"/> Protection goal<br><br><input checked="" type="checkbox"/> Biodiversity: general<br><input type="checkbox"/> Human Health<br><input type="checkbox"/> Animal Health<br><input type="checkbox"/> Plant Health<br><input type="checkbox"/> Soil function<br><input type="checkbox"/> Water quality<br><input checked="" type="checkbox"/> Sustainable Agriculture                                                                                                                                                                                  | <input type="checkbox"/> Influencing factor<br><br><input type="checkbox"/> Agronomic practice<br><input type="checkbox"/> Plant protection<br><input type="checkbox"/> GMO cultivation<br><input type="checkbox"/> Environmental conditions                                                                                            |  |
| Duplication of Farmer's questionnaire                                              | <input checked="" type="checkbox"/> No duplication<br><input type="checkbox"/> Partly duplication<br><input type="checkbox"/> Complete duplication                                                                                                                                                                                                                                                                                                                                                                                                                                   |                                                                                                                                                                                                                                                                                                                                         |  |
| <b>SPECIFICITY</b>                                                                 |                                                                                                                                                                                                                                                                                                                                                                                                                                                                                                                                                                                      |                                                                                                                                                                                                                                                                                                                                         |  |
| Geography                                                                          | <input type="checkbox"/> EU -wide<br><br><input type="checkbox"/> Zone A – North<br><input type="checkbox"/> Denmark,<br><input type="checkbox"/> Estonia,<br><input type="checkbox"/> Latvia,<br><input type="checkbox"/> Lithuania,<br><input type="checkbox"/> Finland,<br><input type="checkbox"/> Sweden                                                                                                                                                                                                                                                                        |                                                                                                                                                                                                                                                                                                                                         |  |
|                                                                                    | <input checked="" type="checkbox"/> Zone B – Centre:<br><input checked="" type="checkbox"/> Belgium,<br><input type="checkbox"/> Czech Republic<br><input type="checkbox"/> Germany,<br><input type="checkbox"/> Ireland,<br><input type="checkbox"/> Luxembourg,<br><input type="checkbox"/> Hungary,<br><input type="checkbox"/> Netherlands,<br><input type="checkbox"/> Austria,<br><input type="checkbox"/> Poland,<br><input type="checkbox"/> Romania,<br><input type="checkbox"/> Slovenia,<br><input type="checkbox"/> Slovakia,<br><input type="checkbox"/> United Kingdom | <input type="checkbox"/> Zone C – South<br><input type="checkbox"/> Bulgaria,<br><input type="checkbox"/> Greece,<br><input type="checkbox"/> Spain,<br><input type="checkbox"/> France,<br><input type="checkbox"/> Italy,<br><input type="checkbox"/> Cyprus,<br><input type="checkbox"/> Malta,<br><input type="checkbox"/> Portugal |  |
|                                                                                    | <input checked="" type="checkbox"/> Regional (specify): Wallonia and Brussels<br><input type="checkbox"/> Local (specify)                                                                                                                                                                                                                                                                                                                                                                                                                                                            |                                                                                                                                                                                                                                                                                                                                         |  |
| Factors                                                                            | <input checked="" type="checkbox"/> Multiple species/items (specify): several species, agriculture<br><input type="checkbox"/> Single species/item (specify)                                                                                                                                                                                                                                                                                                                                                                                                                         |                                                                                                                                                                                                                                                                                                                                         |  |
| Crop                                                                               | <input checked="" type="checkbox"/> No specific crop(s)<br><input type="checkbox"/> Several crops (e.g. all cereals)<br><input type="checkbox"/> Single crop                                                                                                                                                                                                                                                                                                                                                                                                                         |                                                                                                                                                                                                                                                                                                                                         |  |
| Trait /treatment                                                                   | <input checked="" type="checkbox"/> No specific traits/treatments<br><input type="checkbox"/> Several traits/treatments<br><input type="checkbox"/> Single trait/treatment                                                                                                                                                                                                                                                                                                                                                                                                           |                                                                                                                                                                                                                                                                                                                                         |  |
| GMO                                                                                | <input checked="" type="checkbox"/> No GMO bias<br><input type="checkbox"/> GMO specific                                                                                                                                                                                                                                                                                                                                                                                                                                                                                             |                                                                                                                                                                                                                                                                                                                                         |  |

| <b>METHODOLOGY</b>                            |                                                                                                                                                                                                                                                             |
|-----------------------------------------------|-------------------------------------------------------------------------------------------------------------------------------------------------------------------------------------------------------------------------------------------------------------|
| Observations                                  | <input type="checkbox"/> Reported, verifiable methodology<br><input type="checkbox"/> Reported, unverifiable methodology<br><input checked="" type="checkbox"/> Unknown, unverifiable methodology                                                           |
| Frequency                                     | <input type="checkbox"/> > 1 time/year<br><input type="checkbox"/> 1 time/year<br><input type="checkbox"/> < 1 time/year                                                                                                                                    |
| Future                                        | <input type="checkbox"/> For ≥ 5 years<br><input type="checkbox"/> between 1 and 5 years<br><input type="checkbox"/> no prospect                                                                                                                            |
| Quality of performers                         | <input checked="" type="checkbox"/> Trained, professionals<br><input type="checkbox"/> Trained, non-professionals – training by documentation, volunteers<br><input type="checkbox"/> Uncertain or not -specified                                           |
| Quality of data                               | <input checked="" type="checkbox"/> Standard recording of raw data<br><input type="checkbox"/> Free recording of raw data<br><input type="checkbox"/> Anecdotic                                                                                             |
| Analysis                                      | <input type="checkbox"/> Reported, verifiable methodology<br><input type="checkbox"/> Reported, unverifiable methodology<br><input type="checkbox"/> Unknown, unverifiable methodology                                                                      |
| Quality of analysis                           | <input checked="" type="checkbox"/> Scientifically based<br><input type="checkbox"/> Indicative only<br><input type="checkbox"/> Unknown                                                                                                                    |
| <b>REPORTING</b>                              |                                                                                                                                                                                                                                                             |
| Language                                      | Reporting language(s): French                                                                                                                                                                                                                               |
| Availability                                  | <input type="checkbox"/> Scientific publication<br><input type="checkbox"/> Official report available on the internet or in other public forum<br><input type="checkbox"/> Official report available from network<br><input type="checkbox"/> Not available |
| Frequency                                     | <input type="checkbox"/> ≥ 1 time/year –Yearly reports<br><input type="checkbox"/> < 1 time/year – Reports per species or on local findings; distribution maps                                                                                              |
| Historical reference                          | <input type="checkbox"/> over ≥ 5 years<br><input type="checkbox"/> between 1 and 5 years<br><input type="checkbox"/> no historical analysis                                                                                                                |
| <b>COMMENT(S)</b>                             |                                                                                                                                                                                                                                                             |
| Study results not available from the website. |                                                                                                                                                                                                                                                             |

## **Czech republic**



## GSEN-09-0006.00.2 CZ – State Phytosanitary Administration

| EuropaBio's coordinated approach to General Surveillance: Existing Networks |                                                                                                                                                                                                                                                                                                                                                                                                                                                                   |                                                                                                                                                                                                                                                                                                                                                                                                                                                                                                                              |                                                                                                                                                                                                                                                                                              |
|-----------------------------------------------------------------------------|-------------------------------------------------------------------------------------------------------------------------------------------------------------------------------------------------------------------------------------------------------------------------------------------------------------------------------------------------------------------------------------------------------------------------------------------------------------------|------------------------------------------------------------------------------------------------------------------------------------------------------------------------------------------------------------------------------------------------------------------------------------------------------------------------------------------------------------------------------------------------------------------------------------------------------------------------------------------------------------------------------|----------------------------------------------------------------------------------------------------------------------------------------------------------------------------------------------------------------------------------------------------------------------------------------------|
| <b>ORGANISATION</b>                                                         |                                                                                                                                                                                                                                                                                                                                                                                                                                                                   |                                                                                                                                                                                                                                                                                                                                                                                                                                                                                                                              |                                                                                                                                                                                                                                                                                              |
| EuropaBio reference                                                         | GS-EN-09-0006                                                                                                                                                                                                                                                                                                                                                                                                                                                     |                                                                                                                                                                                                                                                                                                                                                                                                                                                                                                                              |                                                                                                                                                                                                                                                                                              |
| Official name of the Network                                                | Státní Rostlinolékařská Správa                                                                                                                                                                                                                                                                                                                                                                                                                                    |                                                                                                                                                                                                                                                                                                                                                                                                                                                                                                                              |                                                                                                                                                                                                                                                                                              |
| Other names                                                                 | SRS<br>State Phytosanitary Administration                                                                                                                                                                                                                                                                                                                                                                                                                         |                                                                                                                                                                                                                                                                                                                                                                                                                                                                                                                              |                                                                                                                                                                                                                                                                                              |
| Type of organisation                                                        | Governmental                                                                                                                                                                                                                                                                                                                                                                                                                                                      |                                                                                                                                                                                                                                                                                                                                                                                                                                                                                                                              |                                                                                                                                                                                                                                                                                              |
| Coordinates                                                                 | Ztracená 1099/10,<br>161 00 Praha 6<br>Czech Republic<br><br>Fax: +420 235 010 363<br>Email: sekretariat[at]srs.cz                                                                                                                                                                                                                                                                                                                                                |                                                                                                                                                                                                                                                                                                                                                                                                                                                                                                                              |                                                                                                                                                                                                                                                                                              |
| Website                                                                     | <a href="http://eagri.cz/public/web/en/srs/portal/">http://eagri.cz/public/web/en/srs/portal/</a>                                                                                                                                                                                                                                                                                                                                                                 |                                                                                                                                                                                                                                                                                                                                                                                                                                                                                                                              |                                                                                                                                                                                                                                                                                              |
| Funding                                                                     | Public                                                                                                                                                                                                                                                                                                                                                                                                                                                            |                                                                                                                                                                                                                                                                                                                                                                                                                                                                                                                              |                                                                                                                                                                                                                                                                                              |
| Conflict of interest                                                        | -                                                                                                                                                                                                                                                                                                                                                                                                                                                                 |                                                                                                                                                                                                                                                                                                                                                                                                                                                                                                                              |                                                                                                                                                                                                                                                                                              |
| Part of other network(s)                                                    | -                                                                                                                                                                                                                                                                                                                                                                                                                                                                 |                                                                                                                                                                                                                                                                                                                                                                                                                                                                                                                              |                                                                                                                                                                                                                                                                                              |
| Grouping other network(s)                                                   | Headquarters, Regional Divisions, District Departments (72), Phytosanitary Border Inspection                                                                                                                                                                                                                                                                                                                                                                      |                                                                                                                                                                                                                                                                                                                                                                                                                                                                                                                              |                                                                                                                                                                                                                                                                                              |
| <b>MONITORING SUBJECT</b>                                                   |                                                                                                                                                                                                                                                                                                                                                                                                                                                                   |                                                                                                                                                                                                                                                                                                                                                                                                                                                                                                                              |                                                                                                                                                                                                                                                                                              |
| Description                                                                 | <ul style="list-style-type: none"> <li>- Systematic surveys of the occurrence of quarantine organisms.</li> <li>- Systematic observation, evaluation and documentation of the occurrence of important harmful organisms and disorders.</li> <li>- Working out forecasts, warnings and reports on their incidence, monitoring their resistance to pesticides, and surveying extent of chemical treatments of crop plants and consumption of pesticides.</li> </ul> |                                                                                                                                                                                                                                                                                                                                                                                                                                                                                                                              |                                                                                                                                                                                                                                                                                              |
| Protection goal(s) and/or Influencing factor (s)                            | <input type="checkbox"/> Protection goal<br><br><input type="checkbox"/> Biodiversity:<br><input type="checkbox"/> Human Health<br><input type="checkbox"/> Animal Health<br><input checked="" type="checkbox"/> Plant Health<br><input type="checkbox"/> Soil function<br><input type="checkbox"/> Water quality<br><input type="checkbox"/> Sustainable Agriculture                                                                                             | <input type="checkbox"/> Influencing factor<br><br><input type="checkbox"/> Agronomic practice<br><input type="checkbox"/> Plant protection<br><input type="checkbox"/> GMO cultivation<br><input type="checkbox"/> Environmental conditions                                                                                                                                                                                                                                                                                 |                                                                                                                                                                                                                                                                                              |
| Duplication of Farmer's questionnaire                                       | <input checked="" type="checkbox"/> No duplication<br><input checked="" type="checkbox"/> Partly duplication<br><input type="checkbox"/> Complete duplication                                                                                                                                                                                                                                                                                                     |                                                                                                                                                                                                                                                                                                                                                                                                                                                                                                                              |                                                                                                                                                                                                                                                                                              |
| <b>SPECIFICITY</b>                                                          |                                                                                                                                                                                                                                                                                                                                                                                                                                                                   |                                                                                                                                                                                                                                                                                                                                                                                                                                                                                                                              |                                                                                                                                                                                                                                                                                              |
| Geography                                                                   | <input type="checkbox"/> EU -wide<br><br><input type="checkbox"/> Zone A – North<br><input type="checkbox"/> Zone B – Centre<br><input type="checkbox"/> Zone C – South                                                                                                                                                                                                                                                                                           |                                                                                                                                                                                                                                                                                                                                                                                                                                                                                                                              |                                                                                                                                                                                                                                                                                              |
|                                                                             | <input type="checkbox"/> Denmark,<br><input type="checkbox"/> Estonia,<br><input type="checkbox"/> Latvia,<br><input type="checkbox"/> Lithuania,<br><input type="checkbox"/> Finland,<br><input type="checkbox"/> Sweden                                                                                                                                                                                                                                         | <input type="checkbox"/> Belgium,<br><input checked="" type="checkbox"/> Czech Republic<br><input type="checkbox"/> Germany,<br><input type="checkbox"/> Ireland,<br><input type="checkbox"/> Luxembourg,<br><input type="checkbox"/> Hungary,<br><input type="checkbox"/> Netherlands,<br><input type="checkbox"/> Austria,<br><input type="checkbox"/> Poland,<br><input type="checkbox"/> Romania,<br><input type="checkbox"/> Slovenia,<br><input type="checkbox"/> Slovakia,<br><input type="checkbox"/> United Kingdom | <input type="checkbox"/> Bulgaria,<br><input type="checkbox"/> Greece,<br><input type="checkbox"/> Spain,<br><input type="checkbox"/> France,<br><input type="checkbox"/> Italy,<br><input type="checkbox"/> Cyprus,<br><input type="checkbox"/> Malta,<br><input type="checkbox"/> Portugal |
|                                                                             | <input type="checkbox"/> Regional (specify)<br><input type="checkbox"/> Local (specify)                                                                                                                                                                                                                                                                                                                                                                           |                                                                                                                                                                                                                                                                                                                                                                                                                                                                                                                              |                                                                                                                                                                                                                                                                                              |
| Factors                                                                     | <input checked="" type="checkbox"/> Multiple species/items (specify): plant pathogens and pests<br><input type="checkbox"/> Single species/item (specify)                                                                                                                                                                                                                                                                                                         |                                                                                                                                                                                                                                                                                                                                                                                                                                                                                                                              |                                                                                                                                                                                                                                                                                              |
| Crop                                                                        | <input checked="" type="checkbox"/> No specific crop(s)<br><input type="checkbox"/> Several crops (e.g. all cereals)<br><input type="checkbox"/> Single crop                                                                                                                                                                                                                                                                                                      |                                                                                                                                                                                                                                                                                                                                                                                                                                                                                                                              |                                                                                                                                                                                                                                                                                              |
| Trait /treatment                                                            | <input checked="" type="checkbox"/> No specific traits/treatments<br><input type="checkbox"/> Several traits/treatments<br><input type="checkbox"/> Single trait/treatment                                                                                                                                                                                                                                                                                        |                                                                                                                                                                                                                                                                                                                                                                                                                                                                                                                              |                                                                                                                                                                                                                                                                                              |

|                                    |                                                                                                                                                                                                                                                                        |
|------------------------------------|------------------------------------------------------------------------------------------------------------------------------------------------------------------------------------------------------------------------------------------------------------------------|
| GMO                                | <input checked="" type="checkbox"/> No GMO bias<br><input type="checkbox"/> GMO specific                                                                                                                                                                               |
| <b>METHODOLOGY</b>                 |                                                                                                                                                                                                                                                                        |
| Observations                       | <input type="checkbox"/> Reported, verifiable methodology<br><input type="checkbox"/> Reported, unverifiable methodology<br><input checked="" type="checkbox"/> Unknown, unverifiable methodology                                                                      |
| Frequency                          | <input type="checkbox"/> > 1 time/year<br><input type="checkbox"/> 1 time/year<br><input type="checkbox"/> < 1 time/year                                                                                                                                               |
| Future                             | <input type="checkbox"/> For ≥ 5 years<br><input type="checkbox"/> between 1 and 5 years<br><input type="checkbox"/> no prospect                                                                                                                                       |
| Quality of performers              | <input checked="" type="checkbox"/> Trained, professionals<br><input type="checkbox"/> Trained, non-professionals – training by documentation, volunteers<br><input type="checkbox"/> Uncertain or not -specified                                                      |
| Quality of data                    | <input type="checkbox"/> Standard recording of raw data<br><input type="checkbox"/> Free recording of raw data<br><input type="checkbox"/> Anecdotic                                                                                                                   |
| Analysis                           | <input type="checkbox"/> Reported, verifiable methodology<br><input type="checkbox"/> Reported, unverifiable methodology<br><input type="checkbox"/> Unknown, unverifiable methodology                                                                                 |
| Quality of analysis                | <input checked="" type="checkbox"/> Scientifically based<br><input type="checkbox"/> Indicative only<br><input type="checkbox"/> Unknown                                                                                                                               |
| <b>REPORTING</b>                   |                                                                                                                                                                                                                                                                        |
| Language                           | Reporting language(s): Czech                                                                                                                                                                                                                                           |
| Availability                       | <input type="checkbox"/> Scientific publication<br><input checked="" type="checkbox"/> Official report available on the internet or in other public forum<br><input type="checkbox"/> Official report available from network<br><input type="checkbox"/> Not available |
| Frequency                          | <input type="checkbox"/> ≥ 1 time/year – Yearly reports only available for 2004, 2005 and 2006<br><input type="checkbox"/> < 1 time/year – Detailed reports per species according to multi-year plan                                                                   |
| Historical reference               | <input type="checkbox"/> over ≥ 5 years<br><input type="checkbox"/> between 1 and 5 years<br><input type="checkbox"/> no historical analysis                                                                                                                           |
| <b>COMMENT(S)</b>                  |                                                                                                                                                                                                                                                                        |
| A broad general monitoring network |                                                                                                                                                                                                                                                                        |

## GSEN-09-0007.00.2 CZ – Central Institute for Supervising and testing in Agriculture

| EuropaBio's coordinated approach to General Surveillance: Existing Networks |                                                                                                                                                                                                                                                                                                                                                                                                                                                                                                                                          |                                                                                                                                                                                                                                                                                                                                                                                                                                                                                                                              |                                                                                                                                                                                                                                                                                              |
|-----------------------------------------------------------------------------|------------------------------------------------------------------------------------------------------------------------------------------------------------------------------------------------------------------------------------------------------------------------------------------------------------------------------------------------------------------------------------------------------------------------------------------------------------------------------------------------------------------------------------------|------------------------------------------------------------------------------------------------------------------------------------------------------------------------------------------------------------------------------------------------------------------------------------------------------------------------------------------------------------------------------------------------------------------------------------------------------------------------------------------------------------------------------|----------------------------------------------------------------------------------------------------------------------------------------------------------------------------------------------------------------------------------------------------------------------------------------------|
| <b>ORGANISATION</b>                                                         |                                                                                                                                                                                                                                                                                                                                                                                                                                                                                                                                          |                                                                                                                                                                                                                                                                                                                                                                                                                                                                                                                              |                                                                                                                                                                                                                                                                                              |
| EuropaBio reference                                                         | GS-EN-09-0007                                                                                                                                                                                                                                                                                                                                                                                                                                                                                                                            |                                                                                                                                                                                                                                                                                                                                                                                                                                                                                                                              |                                                                                                                                                                                                                                                                                              |
| Official name of the Network                                                | Ústřední kontrolní a zkušební ústav zemědělský                                                                                                                                                                                                                                                                                                                                                                                                                                                                                           |                                                                                                                                                                                                                                                                                                                                                                                                                                                                                                                              |                                                                                                                                                                                                                                                                                              |
| Other names                                                                 | ÚKZÚZ<br>Central Institute for Supervising and Testing in Agriculture                                                                                                                                                                                                                                                                                                                                                                                                                                                                    |                                                                                                                                                                                                                                                                                                                                                                                                                                                                                                                              |                                                                                                                                                                                                                                                                                              |
| Type of organisation                                                        | Governmental                                                                                                                                                                                                                                                                                                                                                                                                                                                                                                                             |                                                                                                                                                                                                                                                                                                                                                                                                                                                                                                                              |                                                                                                                                                                                                                                                                                              |
| Coordinates                                                                 | ÚKZÚZ,<br>Hroznová 2,<br>656 06 Brno                                                                                                                                                                                                                                                                                                                                                                                                                                                                                                     |                                                                                                                                                                                                                                                                                                                                                                                                                                                                                                                              |                                                                                                                                                                                                                                                                                              |
| Website                                                                     | <a href="http://www.ukzuz.cz/">http://www.ukzuz.cz/</a>                                                                                                                                                                                                                                                                                                                                                                                                                                                                                  |                                                                                                                                                                                                                                                                                                                                                                                                                                                                                                                              |                                                                                                                                                                                                                                                                                              |
| Funding                                                                     | Public                                                                                                                                                                                                                                                                                                                                                                                                                                                                                                                                   |                                                                                                                                                                                                                                                                                                                                                                                                                                                                                                                              |                                                                                                                                                                                                                                                                                              |
| Conflict of interest                                                        | -                                                                                                                                                                                                                                                                                                                                                                                                                                                                                                                                        |                                                                                                                                                                                                                                                                                                                                                                                                                                                                                                                              |                                                                                                                                                                                                                                                                                              |
| Part of other network(s)                                                    | -                                                                                                                                                                                                                                                                                                                                                                                                                                                                                                                                        |                                                                                                                                                                                                                                                                                                                                                                                                                                                                                                                              |                                                                                                                                                                                                                                                                                              |
| Grouping other network(s)                                                   |                                                                                                                                                                                                                                                                                                                                                                                                                                                                                                                                          |                                                                                                                                                                                                                                                                                                                                                                                                                                                                                                                              |                                                                                                                                                                                                                                                                                              |
| <b>MONITORING SUBJECT</b>                                                   |                                                                                                                                                                                                                                                                                                                                                                                                                                                                                                                                          |                                                                                                                                                                                                                                                                                                                                                                                                                                                                                                                              |                                                                                                                                                                                                                                                                                              |
| Description                                                                 | The Institute performs the administration and carries out some other administrative activities, and expert testing tasks and control and monitoring activities in accordance with special acts in the areas of viticulture, feeding stuffs (feed safety department), varieties, seeds and seedlings of the grown plants, protection of hops, fertilizers, soil improvers, growth regulators and substrates and agrochemical examination of agricultural soil, plant variety rights protection and in the area of the animal production . |                                                                                                                                                                                                                                                                                                                                                                                                                                                                                                                              |                                                                                                                                                                                                                                                                                              |
| Protection goal(s) and/or Influencing factor (s)                            | <input type="checkbox"/> Protection goal<br><br><input type="checkbox"/> Biodiversity:<br><input type="checkbox"/> Human Health<br><input checked="" type="checkbox"/> Animal Health<br><input checked="" type="checkbox"/> Plant Health<br><input checked="" type="checkbox"/> Soil function<br><input type="checkbox"/> Water quality<br><input type="checkbox"/> Sustainable Agriculture                                                                                                                                              | <input type="checkbox"/> Influencing factor<br><br><input type="checkbox"/> Agronomic practice<br><input type="checkbox"/> Plant protection<br><input type="checkbox"/> GMO cultivation<br><input type="checkbox"/> Environmental conditions                                                                                                                                                                                                                                                                                 |                                                                                                                                                                                                                                                                                              |
| Duplication of Farmer's questionnaire                                       | <input checked="" type="checkbox"/> No duplication<br><input checked="" type="checkbox"/> Partly duplication<br><input type="checkbox"/> Complete duplication                                                                                                                                                                                                                                                                                                                                                                            |                                                                                                                                                                                                                                                                                                                                                                                                                                                                                                                              |                                                                                                                                                                                                                                                                                              |
| <b>SPECIFICITY</b>                                                          |                                                                                                                                                                                                                                                                                                                                                                                                                                                                                                                                          |                                                                                                                                                                                                                                                                                                                                                                                                                                                                                                                              |                                                                                                                                                                                                                                                                                              |
| Geography                                                                   | <input type="checkbox"/> EU -wide<br><br><input type="checkbox"/> Zone A – North<br><input type="checkbox"/> Zone B – Centre<br><input type="checkbox"/> Zone C – South                                                                                                                                                                                                                                                                                                                                                                  |                                                                                                                                                                                                                                                                                                                                                                                                                                                                                                                              |                                                                                                                                                                                                                                                                                              |
|                                                                             | <input type="checkbox"/> Denmark,<br><input type="checkbox"/> Estonia,<br><input type="checkbox"/> Latvia,<br><input type="checkbox"/> Lithuania,<br><input type="checkbox"/> Finland,<br><input type="checkbox"/> Sweden                                                                                                                                                                                                                                                                                                                | <input type="checkbox"/> Belgium,<br><input checked="" type="checkbox"/> Czech Republic<br><input type="checkbox"/> Germany,<br><input type="checkbox"/> Ireland,<br><input type="checkbox"/> Luxembourg,<br><input type="checkbox"/> Hungary,<br><input type="checkbox"/> Netherlands,<br><input type="checkbox"/> Austria,<br><input type="checkbox"/> Poland,<br><input type="checkbox"/> Romania,<br><input type="checkbox"/> Slovenia,<br><input type="checkbox"/> Slovakia,<br><input type="checkbox"/> United Kingdom | <input type="checkbox"/> Bulgaria,<br><input type="checkbox"/> Greece,<br><input type="checkbox"/> Spain,<br><input type="checkbox"/> France,<br><input type="checkbox"/> Italy,<br><input type="checkbox"/> Cyprus,<br><input type="checkbox"/> Malta,<br><input type="checkbox"/> Portugal |
|                                                                             | <input type="checkbox"/> Regional (specify)<br><input type="checkbox"/> Local (specify)                                                                                                                                                                                                                                                                                                                                                                                                                                                  |                                                                                                                                                                                                                                                                                                                                                                                                                                                                                                                              |                                                                                                                                                                                                                                                                                              |
| Factors                                                                     | <input checked="" type="checkbox"/> Multiple species/items (specify): animal health, soil function (fertilizers, soil improvers)<br><input type="checkbox"/> Single species/item (specify)                                                                                                                                                                                                                                                                                                                                               |                                                                                                                                                                                                                                                                                                                                                                                                                                                                                                                              |                                                                                                                                                                                                                                                                                              |
| Crop                                                                        | <input checked="" type="checkbox"/> No specific crop(s)<br><input type="checkbox"/> Several crops (e.g. all cereals)<br><input type="checkbox"/> Single crop                                                                                                                                                                                                                                                                                                                                                                             |                                                                                                                                                                                                                                                                                                                                                                                                                                                                                                                              |                                                                                                                                                                                                                                                                                              |
| Trait /treatment                                                            | <input checked="" type="checkbox"/> No specific traits/treatments<br><input type="checkbox"/> Several traits/treatments<br><input type="checkbox"/> Single trait/treatment                                                                                                                                                                                                                                                                                                                                                               |                                                                                                                                                                                                                                                                                                                                                                                                                                                                                                                              |                                                                                                                                                                                                                                                                                              |
| GMO                                                                         | <input checked="" type="checkbox"/> No GMO bias                                                                                                                                                                                                                                                                                                                                                                                                                                                                                          |                                                                                                                                                                                                                                                                                                                                                                                                                                                                                                                              |                                                                                                                                                                                                                                                                                              |

|                                    |                                                                                                                                                                                                                                                                        |
|------------------------------------|------------------------------------------------------------------------------------------------------------------------------------------------------------------------------------------------------------------------------------------------------------------------|
|                                    | <input type="checkbox"/> GMO specific                                                                                                                                                                                                                                  |
| <b>METHODOLOGY</b>                 |                                                                                                                                                                                                                                                                        |
| Observations                       | <input checked="" type="checkbox"/> Reported, verifiable methodology<br><input type="checkbox"/> Reported, unverifiable methodology<br><input type="checkbox"/> Unknown, unverifiable methodology                                                                      |
| Frequency                          | <input type="checkbox"/> > 1 time/year<br><input checked="" type="checkbox"/> 1 time/year<br><input type="checkbox"/> < 1 time/year                                                                                                                                    |
| Future                             | <input checked="" type="checkbox"/> For ≥ 5 years<br><input type="checkbox"/> between 1 and 5 years<br><input type="checkbox"/> no prospect                                                                                                                            |
| Quality of performers              | <input checked="" type="checkbox"/> Trained, professionals<br><input type="checkbox"/> Trained, non-professionals – training by documentation, volunteers<br><input type="checkbox"/> Uncertain or not -specified                                                      |
| Quality of data                    | <input checked="" type="checkbox"/> Standard recording of raw data<br><input type="checkbox"/> Free recording of raw data<br><input type="checkbox"/> Anecdotic                                                                                                        |
| Analysis                           | <input type="checkbox"/> Reported, verifiable methodology<br><input type="checkbox"/> Reported, unverifiable methodology<br><input type="checkbox"/> Unknown, unverifiable methodology                                                                                 |
| Quality of analysis                | <input checked="" type="checkbox"/> Scientifically based<br><input type="checkbox"/> Indicative only<br><input type="checkbox"/> Unknown                                                                                                                               |
| <b>REPORTING</b>                   |                                                                                                                                                                                                                                                                        |
| Language                           | Reporting language(s): Czech                                                                                                                                                                                                                                           |
| Availability                       | <input type="checkbox"/> Scientific publication<br><input checked="" type="checkbox"/> Official report available on the internet or in other public forum<br><input type="checkbox"/> Official report available from network<br><input type="checkbox"/> Not available |
| Frequency                          | <input type="checkbox"/> ≥ 1 time/year – bulletins on several topics<br><input type="checkbox"/> < 1 time/year – review reports over several years                                                                                                                     |
| Historical reference               | <input checked="" type="checkbox"/> over ≥ 5 years<br><input type="checkbox"/> between 1 and 5 years<br><input type="checkbox"/> no historical analysis                                                                                                                |
| <b>COMMENT(S)</b>                  |                                                                                                                                                                                                                                                                        |
| A broad general monitoring network |                                                                                                                                                                                                                                                                        |

## GSEN-09-0008.00.2 CZ – Ministry of Agriculture

| EuropaBio's coordinated approach to General Surveillance: Existing Networks |                                                                                                                                                                                                                                                                                                                                                                                                                                                                                                                                                                          |                                                                                                                                                                                                                                                                                                                                         |  |
|-----------------------------------------------------------------------------|--------------------------------------------------------------------------------------------------------------------------------------------------------------------------------------------------------------------------------------------------------------------------------------------------------------------------------------------------------------------------------------------------------------------------------------------------------------------------------------------------------------------------------------------------------------------------|-----------------------------------------------------------------------------------------------------------------------------------------------------------------------------------------------------------------------------------------------------------------------------------------------------------------------------------------|--|
| <b>ORGANISATION</b>                                                         |                                                                                                                                                                                                                                                                                                                                                                                                                                                                                                                                                                          |                                                                                                                                                                                                                                                                                                                                         |  |
| EuropaBio reference                                                         | GS-EN-09-0008                                                                                                                                                                                                                                                                                                                                                                                                                                                                                                                                                            |                                                                                                                                                                                                                                                                                                                                         |  |
| Official name of the Network                                                | Ministerstvo zemědělství                                                                                                                                                                                                                                                                                                                                                                                                                                                                                                                                                 |                                                                                                                                                                                                                                                                                                                                         |  |
| Other names                                                                 | MZe<br>Ministry of Agriculture: GMO location registers                                                                                                                                                                                                                                                                                                                                                                                                                                                                                                                   |                                                                                                                                                                                                                                                                                                                                         |  |
| Type of organisation                                                        | Governmental                                                                                                                                                                                                                                                                                                                                                                                                                                                                                                                                                             |                                                                                                                                                                                                                                                                                                                                         |  |
| Coordinates                                                                 | Těšnov 17<br>Prague 1 - 117 05<br><br>Fax: +420 224 810 478<br>Email: info[at]mze.cz                                                                                                                                                                                                                                                                                                                                                                                                                                                                                     |                                                                                                                                                                                                                                                                                                                                         |  |
| Website                                                                     | <a href="http://eagri.cz/public/web/mze/zemedelstvi/gmo-geneticky-modifikovane-organismy/">http://eagri.cz/public/web/mze/zemedelstvi/gmo-geneticky-modifikovane-organismy/</a>                                                                                                                                                                                                                                                                                                                                                                                          |                                                                                                                                                                                                                                                                                                                                         |  |
| Funding                                                                     | Public                                                                                                                                                                                                                                                                                                                                                                                                                                                                                                                                                                   |                                                                                                                                                                                                                                                                                                                                         |  |
| Conflict of interest                                                        | -                                                                                                                                                                                                                                                                                                                                                                                                                                                                                                                                                                        |                                                                                                                                                                                                                                                                                                                                         |  |
| Part of other network(s)                                                    | -                                                                                                                                                                                                                                                                                                                                                                                                                                                                                                                                                                        |                                                                                                                                                                                                                                                                                                                                         |  |
| Grouping other network(s)                                                   |                                                                                                                                                                                                                                                                                                                                                                                                                                                                                                                                                                          |                                                                                                                                                                                                                                                                                                                                         |  |
| <b>MONITORING SUBJECT</b>                                                   |                                                                                                                                                                                                                                                                                                                                                                                                                                                                                                                                                                          |                                                                                                                                                                                                                                                                                                                                         |  |
| Description                                                                 | The Ministry provides information on GMOs and maintains the GMO register                                                                                                                                                                                                                                                                                                                                                                                                                                                                                                 |                                                                                                                                                                                                                                                                                                                                         |  |
| Protection goal(s) and/or Influencing factor (s)                            | <input type="checkbox"/> Protection goal<br><br><input type="checkbox"/> Biodiversity<br><input type="checkbox"/> Human Health<br><input type="checkbox"/> Animal Health<br><input type="checkbox"/> Plant Health<br><input type="checkbox"/> Soil function<br><input type="checkbox"/> Water quality<br><input type="checkbox"/> Sustainable Agriculture                                                                                                                                                                                                                | <input type="checkbox"/> Influencing factor<br><br><input type="checkbox"/> Agronomic practice<br><input type="checkbox"/> Plant protection<br><input checked="" type="checkbox"/> GMO cultivation<br><input type="checkbox"/> Environmental conditions                                                                                 |  |
| Duplication of Farmer's questionnaire                                       | <input checked="" type="checkbox"/> No duplication<br><input checked="" type="checkbox"/> Partly duplication<br><input type="checkbox"/> Complete duplication                                                                                                                                                                                                                                                                                                                                                                                                            |                                                                                                                                                                                                                                                                                                                                         |  |
| <b>SPECIFICITY</b>                                                          |                                                                                                                                                                                                                                                                                                                                                                                                                                                                                                                                                                          |                                                                                                                                                                                                                                                                                                                                         |  |
| Geography                                                                   | <input type="checkbox"/> EU -wide<br><br><input type="checkbox"/> Zone A – North<br><input type="checkbox"/> Denmark,<br><input type="checkbox"/> Estonia,<br><input type="checkbox"/> Latvia,<br><input type="checkbox"/> Lithuania,<br><input type="checkbox"/> Finland,<br><input type="checkbox"/> Sweden                                                                                                                                                                                                                                                            |                                                                                                                                                                                                                                                                                                                                         |  |
|                                                                             | <input type="checkbox"/> Zone B – Centre<br><input type="checkbox"/> Belgium,<br><input checked="" type="checkbox"/> Czech Republic<br><input type="checkbox"/> Germany,<br><input type="checkbox"/> Ireland,<br><input type="checkbox"/> Luxembourg,<br><input type="checkbox"/> Hungary,<br><input type="checkbox"/> Netherlands,<br><input type="checkbox"/> Austria,<br><input type="checkbox"/> Poland,<br><input type="checkbox"/> Romania,<br><input type="checkbox"/> Slovenia,<br><input type="checkbox"/> Slovakia,<br><input type="checkbox"/> United Kingdom | <input type="checkbox"/> Zone C – South<br><input type="checkbox"/> Bulgaria,<br><input type="checkbox"/> Greece,<br><input type="checkbox"/> Spain,<br><input type="checkbox"/> France,<br><input type="checkbox"/> Italy,<br><input type="checkbox"/> Cyprus,<br><input type="checkbox"/> Malta,<br><input type="checkbox"/> Portugal |  |
|                                                                             | <input type="checkbox"/> Regional (specify)<br><input type="checkbox"/> Local (specify)                                                                                                                                                                                                                                                                                                                                                                                                                                                                                  |                                                                                                                                                                                                                                                                                                                                         |  |
| Factors                                                                     | <input checked="" type="checkbox"/> Multiple species/items (specify): all GMOs<br><input type="checkbox"/> Single species/item (specify)                                                                                                                                                                                                                                                                                                                                                                                                                                 |                                                                                                                                                                                                                                                                                                                                         |  |
| Crop                                                                        | <input checked="" type="checkbox"/> No specific crop(s)<br><input type="checkbox"/> Several crops (e.g. all cereals)<br><input type="checkbox"/> Single crop                                                                                                                                                                                                                                                                                                                                                                                                             |                                                                                                                                                                                                                                                                                                                                         |  |
| Trait /treatment                                                            | <input checked="" type="checkbox"/> No specific traits/treatments<br><input type="checkbox"/> Several traits/treatments<br><input type="checkbox"/> Single trait/treatment                                                                                                                                                                                                                                                                                                                                                                                               |                                                                                                                                                                                                                                                                                                                                         |  |
| GMO                                                                         | <input type="checkbox"/> No GMO bias<br><input checked="" type="checkbox"/> GMO specific                                                                                                                                                                                                                                                                                                                                                                                                                                                                                 |                                                                                                                                                                                                                                                                                                                                         |  |
| <b>METHODOLOGY</b>                                                          |                                                                                                                                                                                                                                                                                                                                                                                                                                                                                                                                                                          |                                                                                                                                                                                                                                                                                                                                         |  |
| Observations                                                                | <input checked="" type="checkbox"/> Reported, verifiable methodology                                                                                                                                                                                                                                                                                                                                                                                                                                                                                                     |                                                                                                                                                                                                                                                                                                                                         |  |

|                              |                                                                                                                                                                                                                                                             |
|------------------------------|-------------------------------------------------------------------------------------------------------------------------------------------------------------------------------------------------------------------------------------------------------------|
|                              | <input type="checkbox"/> Reported, unverifiable methodology<br><input type="checkbox"/> Unknown, unverifiable methodology                                                                                                                                   |
| Frequency                    | <input type="checkbox"/> > 1 time/year<br><input checked="" type="checkbox"/> 1 time/year<br><input type="checkbox"/> < 1 time/year                                                                                                                         |
| Future                       | <input checked="" type="checkbox"/> For ≥ 5 years<br><input type="checkbox"/> between 1 and 5 years<br><input type="checkbox"/> no prospect                                                                                                                 |
| Quality of performers        | <input checked="" type="checkbox"/> Trained, professionals<br><input type="checkbox"/> Trained, non-professionals – training by documentation, volunteers<br><input type="checkbox"/> Uncertain or not -specified                                           |
| Quality of data              | <input checked="" type="checkbox"/> Standard recording of raw data<br><input type="checkbox"/> Free recording of raw data<br><input type="checkbox"/> Anecdotic                                                                                             |
| Analysis                     | <input type="checkbox"/> Reported, verifiable methodology<br><input type="checkbox"/> Reported, unverifiable methodology<br><input type="checkbox"/> Unknown, unverifiable methodology                                                                      |
| Quality of analysis          | <input checked="" type="checkbox"/> Scientifically based<br><input type="checkbox"/> Indicative only<br><input type="checkbox"/> Unknown                                                                                                                    |
| <b>REPORTING</b>             |                                                                                                                                                                                                                                                             |
| Language                     | Reporting language(s): Czech                                                                                                                                                                                                                                |
| Availability                 | <input type="checkbox"/> Scientific publication<br><input type="checkbox"/> Official report available on the internet or in other public forum<br><input type="checkbox"/> Official report available from network<br><input type="checkbox"/> Not available |
| Frequency                    | <input type="checkbox"/> ≥ 1 time/year – bulletins on several topics<br><input type="checkbox"/> < 1 time/year – review reports over several years                                                                                                          |
| Historical reference         | <input checked="" type="checkbox"/> over ≥ 5 years<br><input type="checkbox"/> between 1 and 5 years<br><input type="checkbox"/> no historical analysis                                                                                                     |
| <b>COMMENT(S)</b>            |                                                                                                                                                                                                                                                             |
| Specific for GMO cultivation |                                                                                                                                                                                                                                                             |

## GSEN-09-0009.00.2 CZ – Nature conservation & landscape protection

| EuropaBio's coordinated approach to General Surveillance: Existing Networks |                                                                                                                                                                                                                                                                                                                                                                                                                                                                                                                                                                          |                                                                                                                                                                                                                                                                                                                                         |  |
|-----------------------------------------------------------------------------|--------------------------------------------------------------------------------------------------------------------------------------------------------------------------------------------------------------------------------------------------------------------------------------------------------------------------------------------------------------------------------------------------------------------------------------------------------------------------------------------------------------------------------------------------------------------------|-----------------------------------------------------------------------------------------------------------------------------------------------------------------------------------------------------------------------------------------------------------------------------------------------------------------------------------------|--|
| <b>ORGANISATION</b>                                                         |                                                                                                                                                                                                                                                                                                                                                                                                                                                                                                                                                                          |                                                                                                                                                                                                                                                                                                                                         |  |
| EuropaBio reference                                                         | GS-EN-09-0009                                                                                                                                                                                                                                                                                                                                                                                                                                                                                                                                                            |                                                                                                                                                                                                                                                                                                                                         |  |
| Official name of the Network                                                | Agentura ochrany přírody a krajiny ČR                                                                                                                                                                                                                                                                                                                                                                                                                                                                                                                                    |                                                                                                                                                                                                                                                                                                                                         |  |
| Other names                                                                 | ANCLP CR<br>Agency for Nature Conservation and Landscape Protection of the Czech Republic                                                                                                                                                                                                                                                                                                                                                                                                                                                                                |                                                                                                                                                                                                                                                                                                                                         |  |
| Type of organisation                                                        | Governmental                                                                                                                                                                                                                                                                                                                                                                                                                                                                                                                                                             |                                                                                                                                                                                                                                                                                                                                         |  |
| Coordinates                                                                 | Nuselska 39/236<br>140 00 Praha 4<br><br>Fax: +420 241 082 999<br>Email: aopkcr[at]nature.cz                                                                                                                                                                                                                                                                                                                                                                                                                                                                             |                                                                                                                                                                                                                                                                                                                                         |  |
| Website                                                                     | <a href="http://www.ochranaprirody.cz/">http://www.ochranaprirody.cz/</a>                                                                                                                                                                                                                                                                                                                                                                                                                                                                                                |                                                                                                                                                                                                                                                                                                                                         |  |
| Funding                                                                     | Public                                                                                                                                                                                                                                                                                                                                                                                                                                                                                                                                                                   |                                                                                                                                                                                                                                                                                                                                         |  |
| Conflict of interest                                                        | -                                                                                                                                                                                                                                                                                                                                                                                                                                                                                                                                                                        |                                                                                                                                                                                                                                                                                                                                         |  |
| Part of other network(s)                                                    | -                                                                                                                                                                                                                                                                                                                                                                                                                                                                                                                                                                        |                                                                                                                                                                                                                                                                                                                                         |  |
| Grouping other network(s)                                                   |                                                                                                                                                                                                                                                                                                                                                                                                                                                                                                                                                                          |                                                                                                                                                                                                                                                                                                                                         |  |
| <b>MONITORING SUBJECT</b>                                                   |                                                                                                                                                                                                                                                                                                                                                                                                                                                                                                                                                                          |                                                                                                                                                                                                                                                                                                                                         |  |
| Description                                                                 | ANCLP is predominantly active in conservation of landscape, special sites and species. Includes Nature 2000.                                                                                                                                                                                                                                                                                                                                                                                                                                                             |                                                                                                                                                                                                                                                                                                                                         |  |
| Protection goal(s) and/or Influencing factor (s)                            | <input type="checkbox"/> Protection goal<br><br><input type="checkbox"/> Biodiversity: general<br><input type="checkbox"/> Human Health<br><input type="checkbox"/> Animal Health<br><input type="checkbox"/> Plant Health<br><input type="checkbox"/> Soil function<br><input type="checkbox"/> Water quality<br><input type="checkbox"/> Sustainable Agriculture                                                                                                                                                                                                       | <input type="checkbox"/> Influencing factor<br><br><input type="checkbox"/> Agronomic practice<br><input type="checkbox"/> Plant protection<br><input type="checkbox"/> GMO cultivation<br><input type="checkbox"/> Environmental conditions                                                                                            |  |
| Duplication of Farmer's questionnaire                                       | <input checked="" type="checkbox"/> No duplication<br><input checked="" type="checkbox"/> Partly duplication<br><input type="checkbox"/> Complete duplication                                                                                                                                                                                                                                                                                                                                                                                                            |                                                                                                                                                                                                                                                                                                                                         |  |
| <b>SPECIFICITY</b>                                                          |                                                                                                                                                                                                                                                                                                                                                                                                                                                                                                                                                                          |                                                                                                                                                                                                                                                                                                                                         |  |
| Geography                                                                   | <input type="checkbox"/> EU -wide<br><br><input type="checkbox"/> Zone A – North<br><input type="checkbox"/> Denmark,<br><input type="checkbox"/> Estonia,<br><input type="checkbox"/> Latvia,<br><input type="checkbox"/> Lithuania,<br><input type="checkbox"/> Finland,<br><input type="checkbox"/> Sweden                                                                                                                                                                                                                                                            |                                                                                                                                                                                                                                                                                                                                         |  |
|                                                                             | <input type="checkbox"/> Zone B – Centre<br><input type="checkbox"/> Belgium,<br><input checked="" type="checkbox"/> Czech Republic<br><input type="checkbox"/> Germany,<br><input type="checkbox"/> Ireland,<br><input type="checkbox"/> Luxembourg,<br><input type="checkbox"/> Hungary,<br><input type="checkbox"/> Netherlands,<br><input type="checkbox"/> Austria,<br><input type="checkbox"/> Poland,<br><input type="checkbox"/> Romania,<br><input type="checkbox"/> Slovenia,<br><input type="checkbox"/> Slovakia,<br><input type="checkbox"/> United Kingdom | <input type="checkbox"/> Zone C – South<br><input type="checkbox"/> Bulgaria,<br><input type="checkbox"/> Greece,<br><input type="checkbox"/> Spain,<br><input type="checkbox"/> France,<br><input type="checkbox"/> Italy,<br><input type="checkbox"/> Cyprus,<br><input type="checkbox"/> Malta,<br><input type="checkbox"/> Portugal |  |
|                                                                             | <input type="checkbox"/> Regional (specify)<br><input type="checkbox"/> Local (specify)                                                                                                                                                                                                                                                                                                                                                                                                                                                                                  |                                                                                                                                                                                                                                                                                                                                         |  |
| Factors                                                                     | <input checked="" type="checkbox"/> Multiple species/items (specify): mammals, birds, amphibian, reptiles, fish, invertebrates, habitats, plants<br><input type="checkbox"/> Single species/item (specify)                                                                                                                                                                                                                                                                                                                                                               |                                                                                                                                                                                                                                                                                                                                         |  |
| Crop                                                                        | <input checked="" type="checkbox"/> No specific crop(s)<br><input type="checkbox"/> Several crops (e.g. all cereals)<br><input type="checkbox"/> Single crop                                                                                                                                                                                                                                                                                                                                                                                                             |                                                                                                                                                                                                                                                                                                                                         |  |
| Trait /treatment                                                            | <input checked="" type="checkbox"/> No specific traits/treatments<br><input type="checkbox"/> Several traits/treatments<br><input type="checkbox"/> Single trait/treatment                                                                                                                                                                                                                                                                                                                                                                                               |                                                                                                                                                                                                                                                                                                                                         |  |
| GMO                                                                         | <input type="checkbox"/> No GMO bias<br><input checked="" type="checkbox"/> GMO specific                                                                                                                                                                                                                                                                                                                                                                                                                                                                                 |                                                                                                                                                                                                                                                                                                                                         |  |
| <b>METHODOLOGY</b>                                                          |                                                                                                                                                                                                                                                                                                                                                                                                                                                                                                                                                                          |                                                                                                                                                                                                                                                                                                                                         |  |

|                                                                                                                                                                                                                                        |                                                                                                                                                                                                                                                                        |
|----------------------------------------------------------------------------------------------------------------------------------------------------------------------------------------------------------------------------------------|------------------------------------------------------------------------------------------------------------------------------------------------------------------------------------------------------------------------------------------------------------------------|
| Observations                                                                                                                                                                                                                           | <input type="checkbox"/> Reported, verifiable methodology<br><input type="checkbox"/> Reported, unverifiable methodology<br><input checked="" type="checkbox"/> Unknown, unverifiable methodology                                                                      |
| Frequency                                                                                                                                                                                                                              | <input type="checkbox"/> > 1 time/year<br><input checked="" type="checkbox"/> 1 time/year<br><input type="checkbox"/> < 1 time/year                                                                                                                                    |
| Future                                                                                                                                                                                                                                 | <input checked="" type="checkbox"/> For ≥ 5 years<br><input type="checkbox"/> between 1 and 5 years<br><input type="checkbox"/> no prospect                                                                                                                            |
| Quality of performers                                                                                                                                                                                                                  | <input type="checkbox"/> Trained, professionals<br><input checked="" type="checkbox"/> Trained, non-professionals – training by documentation, about 400 volunteers<br><input type="checkbox"/> Uncertain or not -specified                                            |
| Quality of data                                                                                                                                                                                                                        | <input checked="" type="checkbox"/> Standard recording of raw data<br><input type="checkbox"/> Free recording of raw data<br><input type="checkbox"/> Anecdotic                                                                                                        |
| Analysis                                                                                                                                                                                                                               | <input checked="" type="checkbox"/> Reported, verifiable methodology<br><input type="checkbox"/> Reported, unverifiable methodology<br><input type="checkbox"/> Unknown, unverifiable methodology                                                                      |
| Quality of analysis                                                                                                                                                                                                                    | <input checked="" type="checkbox"/> Scientifically based<br><input type="checkbox"/> Indicative only<br><input type="checkbox"/> Unknown                                                                                                                               |
| <b>REPORTING</b>                                                                                                                                                                                                                       |                                                                                                                                                                                                                                                                        |
| Language                                                                                                                                                                                                                               | Reporting language(s): Czech                                                                                                                                                                                                                                           |
| Availability                                                                                                                                                                                                                           | <input type="checkbox"/> Scientific publication<br><input checked="" type="checkbox"/> Official report available on the internet or in other public forum<br><input type="checkbox"/> Official report available from network<br><input type="checkbox"/> Not available |
| Frequency                                                                                                                                                                                                                              | <input type="checkbox"/> ≥ 1 time/year –<br><input type="checkbox"/> < 1 time/year –                                                                                                                                                                                   |
| Historical reference                                                                                                                                                                                                                   | <input checked="" type="checkbox"/> over ≥ 5 years<br><input type="checkbox"/> between 1 and 5 years<br><input type="checkbox"/> no historical analysis                                                                                                                |
| <b>COMMENT(S)</b>                                                                                                                                                                                                                      |                                                                                                                                                                                                                                                                        |
| Large program to monitor biodiversity indicator groups (mammals, amphibians and reptiles, beetles, butterflies, fungi, fish, birds, plants). Status reports on <a href="http://www.biomonitoring.cz/">http://www.biomonitoring.cz/</a> |                                                                                                                                                                                                                                                                        |



## GSEN-09-0010.00.2 CZ – Hydrometeorological Institute

| EuropaBio's coordinated approach to General Surveillance: Existing Networks |                                                                                                                                                                                                                                                                                                                                                                                                                                                                                                                                                                          |                                                                                                                                                                                                                                                                                                                                         |  |
|-----------------------------------------------------------------------------|--------------------------------------------------------------------------------------------------------------------------------------------------------------------------------------------------------------------------------------------------------------------------------------------------------------------------------------------------------------------------------------------------------------------------------------------------------------------------------------------------------------------------------------------------------------------------|-----------------------------------------------------------------------------------------------------------------------------------------------------------------------------------------------------------------------------------------------------------------------------------------------------------------------------------------|--|
| <b>ORGANISATION</b>                                                         |                                                                                                                                                                                                                                                                                                                                                                                                                                                                                                                                                                          |                                                                                                                                                                                                                                                                                                                                         |  |
| EuropaBio reference                                                         | GS-EN-09-0010                                                                                                                                                                                                                                                                                                                                                                                                                                                                                                                                                            |                                                                                                                                                                                                                                                                                                                                         |  |
| Official name of the Network                                                | Český hydrometeorologický ústav                                                                                                                                                                                                                                                                                                                                                                                                                                                                                                                                          |                                                                                                                                                                                                                                                                                                                                         |  |
| Other names                                                                 | Czech Hydrometeorological Institute                                                                                                                                                                                                                                                                                                                                                                                                                                                                                                                                      |                                                                                                                                                                                                                                                                                                                                         |  |
| Type of organisation                                                        | Governmental                                                                                                                                                                                                                                                                                                                                                                                                                                                                                                                                                             |                                                                                                                                                                                                                                                                                                                                         |  |
| Coordinates                                                                 | Na Šabatce 2050/17,<br>143 06 Praha<br><br>Fax: +420 241 760 689                                                                                                                                                                                                                                                                                                                                                                                                                                                                                                         |                                                                                                                                                                                                                                                                                                                                         |  |
| Website                                                                     | <a href="http://www.chmu.cz/">http://www.chmu.cz/</a>                                                                                                                                                                                                                                                                                                                                                                                                                                                                                                                    |                                                                                                                                                                                                                                                                                                                                         |  |
| Funding                                                                     | Public                                                                                                                                                                                                                                                                                                                                                                                                                                                                                                                                                                   |                                                                                                                                                                                                                                                                                                                                         |  |
| Conflict of interest                                                        | -                                                                                                                                                                                                                                                                                                                                                                                                                                                                                                                                                                        |                                                                                                                                                                                                                                                                                                                                         |  |
| Part of other network(s)                                                    | -                                                                                                                                                                                                                                                                                                                                                                                                                                                                                                                                                                        |                                                                                                                                                                                                                                                                                                                                         |  |
| Grouping other network(s)                                                   |                                                                                                                                                                                                                                                                                                                                                                                                                                                                                                                                                                          |                                                                                                                                                                                                                                                                                                                                         |  |
| <b>MONITORING SUBJECT</b>                                                   |                                                                                                                                                                                                                                                                                                                                                                                                                                                                                                                                                                          |                                                                                                                                                                                                                                                                                                                                         |  |
| Description                                                                 | Routine verification of weather conditions (and forecast) as well as water quality                                                                                                                                                                                                                                                                                                                                                                                                                                                                                       |                                                                                                                                                                                                                                                                                                                                         |  |
| Protection goal(s) and/or Influencing factor (s)                            | <input type="checkbox"/> Protection goal<br><br><input type="checkbox"/> Biodiversity:<br><input type="checkbox"/> Human Health<br><input type="checkbox"/> Animal Health<br><input type="checkbox"/> Plant Health<br><input type="checkbox"/> Soil function<br><input type="checkbox"/> Water quality<br><input type="checkbox"/> Sustainable Agriculture                                                                                                                                                                                                               | <input type="checkbox"/> Influencing factor<br><br><input type="checkbox"/> Agronomic practice<br><input type="checkbox"/> Plant protection<br><input type="checkbox"/> GMO cultivation<br><input type="checkbox"/> Environmental conditions                                                                                            |  |
| Duplication of Farmer's questionnaire                                       | <input checked="" type="checkbox"/> No duplication<br><input checked="" type="checkbox"/> Partly duplication<br><input type="checkbox"/> Complete duplication                                                                                                                                                                                                                                                                                                                                                                                                            |                                                                                                                                                                                                                                                                                                                                         |  |
| <b>SPECIFICITY</b>                                                          |                                                                                                                                                                                                                                                                                                                                                                                                                                                                                                                                                                          |                                                                                                                                                                                                                                                                                                                                         |  |
| Geography                                                                   | <input type="checkbox"/> EU -wide<br><br><input type="checkbox"/> Zone A – North<br><input type="checkbox"/> Denmark,<br><input type="checkbox"/> Estonia,<br><input type="checkbox"/> Latvia,<br><input type="checkbox"/> Lithuania,<br><input type="checkbox"/> Finland,<br><input type="checkbox"/> Sweden                                                                                                                                                                                                                                                            |                                                                                                                                                                                                                                                                                                                                         |  |
|                                                                             | <input type="checkbox"/> Zone B – Centre<br><input type="checkbox"/> Belgium,<br><input checked="" type="checkbox"/> Czech Republic<br><input type="checkbox"/> Germany,<br><input type="checkbox"/> Ireland,<br><input type="checkbox"/> Luxembourg,<br><input type="checkbox"/> Hungary,<br><input type="checkbox"/> Netherlands,<br><input type="checkbox"/> Austria,<br><input type="checkbox"/> Poland,<br><input type="checkbox"/> Romania,<br><input type="checkbox"/> Slovenia,<br><input type="checkbox"/> Slovakia,<br><input type="checkbox"/> United Kingdom | <input type="checkbox"/> Zone C – South<br><input type="checkbox"/> Bulgaria,<br><input type="checkbox"/> Greece,<br><input type="checkbox"/> Spain,<br><input type="checkbox"/> France,<br><input type="checkbox"/> Italy,<br><input type="checkbox"/> Cyprus,<br><input type="checkbox"/> Malta,<br><input type="checkbox"/> Portugal |  |
|                                                                             | <input type="checkbox"/> Regional (specify)<br><input type="checkbox"/> Local (specify)                                                                                                                                                                                                                                                                                                                                                                                                                                                                                  |                                                                                                                                                                                                                                                                                                                                         |  |
| Factors                                                                     | <input checked="" type="checkbox"/> Multiple species/items (specify): temperature, rain, water quality<br><input type="checkbox"/> Single species/item (specify)                                                                                                                                                                                                                                                                                                                                                                                                         |                                                                                                                                                                                                                                                                                                                                         |  |
| Crop                                                                        | <input checked="" type="checkbox"/> No specific crop(s)<br><input type="checkbox"/> Several crops (e.g. all cereals)<br><input type="checkbox"/> Single crop                                                                                                                                                                                                                                                                                                                                                                                                             |                                                                                                                                                                                                                                                                                                                                         |  |
| Trait /treatment                                                            | <input checked="" type="checkbox"/> No specific traits/treatments<br><input type="checkbox"/> Several traits/treatments<br><input type="checkbox"/> Single trait/treatment                                                                                                                                                                                                                                                                                                                                                                                               |                                                                                                                                                                                                                                                                                                                                         |  |
| GMO                                                                         | <input checked="" type="checkbox"/> No GMO bias<br><input type="checkbox"/> GMO specific                                                                                                                                                                                                                                                                                                                                                                                                                                                                                 |                                                                                                                                                                                                                                                                                                                                         |  |
| <b>METHODOLOGY</b>                                                          |                                                                                                                                                                                                                                                                                                                                                                                                                                                                                                                                                                          |                                                                                                                                                                                                                                                                                                                                         |  |
| Observations                                                                | <input type="checkbox"/> Reported, verifiable methodology<br><input type="checkbox"/> Reported, unverifiable methodology<br><input checked="" type="checkbox"/> Unknown, unverifiable methodology                                                                                                                                                                                                                                                                                                                                                                        |                                                                                                                                                                                                                                                                                                                                         |  |

|                                                                |                                                                                                                                                                                                                                                             |
|----------------------------------------------------------------|-------------------------------------------------------------------------------------------------------------------------------------------------------------------------------------------------------------------------------------------------------------|
| Frequency                                                      | <input type="checkbox"/> > 1 time/year<br><input type="checkbox"/> 1 time/year<br><input type="checkbox"/> < 1 time/year                                                                                                                                    |
| Future                                                         | <input type="checkbox"/> For ≥ 5 years<br><input type="checkbox"/> between 1 and 5 years<br><input type="checkbox"/> no prospect                                                                                                                            |
| Quality of performers                                          | <input type="checkbox"/> Trained, professionals<br><input type="checkbox"/> Trained, non-professionals – training by documentation, volunteers<br><input type="checkbox"/> Uncertain or not -specified                                                      |
| Quality of data                                                | <input type="checkbox"/> Standard recording of raw data<br><input type="checkbox"/> Free recording of raw data<br><input type="checkbox"/> Anecdotic                                                                                                        |
| Analysis                                                       | <input type="checkbox"/> Reported, verifiable methodology<br><input type="checkbox"/> Reported, unverifiable methodology<br><input type="checkbox"/> Unknown, unverifiable methodology                                                                      |
| Quality of analysis                                            | <input type="checkbox"/> Scientifically based<br><input type="checkbox"/> Indicative only<br><input type="checkbox"/> Unknown                                                                                                                               |
| <b>REPORTING</b>                                               |                                                                                                                                                                                                                                                             |
| Language                                                       | Reporting language(s): Czech                                                                                                                                                                                                                                |
| Availability                                                   | <input type="checkbox"/> Scientific publication<br><input type="checkbox"/> Official report available on the internet or in other public forum<br><input type="checkbox"/> Official report available from network<br><input type="checkbox"/> Not available |
| Frequency                                                      | <input type="checkbox"/> ≥ 1 time/year – bulletins on several topics<br><input type="checkbox"/> < 1 time/year – review reports over several years                                                                                                          |
| Historical reference                                           | <input checked="" type="checkbox"/> over ≥ 5 years<br><input type="checkbox"/> between 1 and 5 years<br><input type="checkbox"/> no historical analysis                                                                                                     |
| <b>COMMENT(S)</b>                                              |                                                                                                                                                                                                                                                             |
| Information available on request, weather info as paid service |                                                                                                                                                                                                                                                             |

## GSEN-09-0011.00.2 CZ – Apiculture Institute

| EuropaBio's coordinated approach to General Surveillance: Existing Networks |                                                                                                                                                                                                                                                                                                                                                                                              |                                                                                                                                                                                                                                                                                                                                                                                                                                                                                                                              |                                                                                                                                                                                                                                                                                              |
|-----------------------------------------------------------------------------|----------------------------------------------------------------------------------------------------------------------------------------------------------------------------------------------------------------------------------------------------------------------------------------------------------------------------------------------------------------------------------------------|------------------------------------------------------------------------------------------------------------------------------------------------------------------------------------------------------------------------------------------------------------------------------------------------------------------------------------------------------------------------------------------------------------------------------------------------------------------------------------------------------------------------------|----------------------------------------------------------------------------------------------------------------------------------------------------------------------------------------------------------------------------------------------------------------------------------------------|
| <b>ORGANISATION</b>                                                         |                                                                                                                                                                                                                                                                                                                                                                                              |                                                                                                                                                                                                                                                                                                                                                                                                                                                                                                                              |                                                                                                                                                                                                                                                                                              |
| EuropaBio reference                                                         | GS-EN-09-0011                                                                                                                                                                                                                                                                                                                                                                                |                                                                                                                                                                                                                                                                                                                                                                                                                                                                                                                              |                                                                                                                                                                                                                                                                                              |
| Official name of the Network                                                | Výzkumný ústav včelařský                                                                                                                                                                                                                                                                                                                                                                     |                                                                                                                                                                                                                                                                                                                                                                                                                                                                                                                              |                                                                                                                                                                                                                                                                                              |
| Other names                                                                 | Apiculture Institute                                                                                                                                                                                                                                                                                                                                                                         |                                                                                                                                                                                                                                                                                                                                                                                                                                                                                                                              |                                                                                                                                                                                                                                                                                              |
| Type of organisation                                                        | Professional                                                                                                                                                                                                                                                                                                                                                                                 |                                                                                                                                                                                                                                                                                                                                                                                                                                                                                                                              |                                                                                                                                                                                                                                                                                              |
| Coordinates                                                                 | Research Institute of apiculture, s.r.o.<br>Dol 94<br>252 66 Libčice nad Vltavou                                                                                                                                                                                                                                                                                                             |                                                                                                                                                                                                                                                                                                                                                                                                                                                                                                                              |                                                                                                                                                                                                                                                                                              |
| Website                                                                     | <a href="http://www.beedol.cz">http://www.beedol.cz</a>                                                                                                                                                                                                                                                                                                                                      |                                                                                                                                                                                                                                                                                                                                                                                                                                                                                                                              |                                                                                                                                                                                                                                                                                              |
| Funding                                                                     | Research projects, services, products for beekeepers                                                                                                                                                                                                                                                                                                                                         |                                                                                                                                                                                                                                                                                                                                                                                                                                                                                                                              |                                                                                                                                                                                                                                                                                              |
| Conflict of interest                                                        | -                                                                                                                                                                                                                                                                                                                                                                                            |                                                                                                                                                                                                                                                                                                                                                                                                                                                                                                                              |                                                                                                                                                                                                                                                                                              |
| Part of other network(s)                                                    | -                                                                                                                                                                                                                                                                                                                                                                                            |                                                                                                                                                                                                                                                                                                                                                                                                                                                                                                                              |                                                                                                                                                                                                                                                                                              |
| Grouping other network(s)                                                   |                                                                                                                                                                                                                                                                                                                                                                                              |                                                                                                                                                                                                                                                                                                                                                                                                                                                                                                                              |                                                                                                                                                                                                                                                                                              |
| <b>MONITORING SUBJECT</b>                                                   |                                                                                                                                                                                                                                                                                                                                                                                              |                                                                                                                                                                                                                                                                                                                                                                                                                                                                                                                              |                                                                                                                                                                                                                                                                                              |
| Description                                                                 | No systematic monitoring. The Institute has participated in a project "insect pollination of transgenic plants".<br>Monitoring bee diseases.                                                                                                                                                                                                                                                 |                                                                                                                                                                                                                                                                                                                                                                                                                                                                                                                              |                                                                                                                                                                                                                                                                                              |
| Protection goal(s) and/or Influencing factor (s)                            | <input checked="" type="checkbox"/> Protection goal<br><input checked="" type="checkbox"/> Biodiversity: Bees<br><input type="checkbox"/> Human Health<br><input checked="" type="checkbox"/> Animal Health<br><input type="checkbox"/> Plant Health<br><input type="checkbox"/> Soil function<br><input type="checkbox"/> Water quality<br><input type="checkbox"/> Sustainable Agriculture | <input type="checkbox"/> Influencing factor<br><input type="checkbox"/> Agronomic practice<br><input type="checkbox"/> Plant protection<br><input type="checkbox"/> GMO cultivation<br><input type="checkbox"/> Environmental conditions                                                                                                                                                                                                                                                                                     |                                                                                                                                                                                                                                                                                              |
| Duplication of Farmer's questionnaire                                       | <input checked="" type="checkbox"/> No duplication<br><input type="checkbox"/> Partly duplication<br><input type="checkbox"/> Complete duplication                                                                                                                                                                                                                                           |                                                                                                                                                                                                                                                                                                                                                                                                                                                                                                                              |                                                                                                                                                                                                                                                                                              |
| <b>SPECIFICITY</b>                                                          |                                                                                                                                                                                                                                                                                                                                                                                              |                                                                                                                                                                                                                                                                                                                                                                                                                                                                                                                              |                                                                                                                                                                                                                                                                                              |
| Geography                                                                   | <input type="checkbox"/> EU -wide<br><input type="checkbox"/> Zone A – North<br><input type="checkbox"/> Zone B – Centre<br><input type="checkbox"/> Zone C – South                                                                                                                                                                                                                          |                                                                                                                                                                                                                                                                                                                                                                                                                                                                                                                              |                                                                                                                                                                                                                                                                                              |
|                                                                             | <input type="checkbox"/> Denmark,<br><input type="checkbox"/> Estonia,<br><input type="checkbox"/> Latvia,<br><input type="checkbox"/> Lithuania,<br><input type="checkbox"/> Finland,<br><input type="checkbox"/> Sweden                                                                                                                                                                    | <input type="checkbox"/> Belgium,<br><input checked="" type="checkbox"/> Czech Republic<br><input type="checkbox"/> Germany,<br><input type="checkbox"/> Ireland,<br><input type="checkbox"/> Luxembourg,<br><input type="checkbox"/> Hungary,<br><input type="checkbox"/> Netherlands,<br><input type="checkbox"/> Austria,<br><input type="checkbox"/> Poland,<br><input type="checkbox"/> Romania,<br><input type="checkbox"/> Slovenia,<br><input type="checkbox"/> Slovakia,<br><input type="checkbox"/> United Kingdom | <input type="checkbox"/> Bulgaria,<br><input type="checkbox"/> Greece,<br><input type="checkbox"/> Spain,<br><input type="checkbox"/> France,<br><input type="checkbox"/> Italy,<br><input type="checkbox"/> Cyprus,<br><input type="checkbox"/> Malta,<br><input type="checkbox"/> Portugal |
|                                                                             | <input type="checkbox"/> Regional (specify)<br><input type="checkbox"/> Local (specify)                                                                                                                                                                                                                                                                                                      |                                                                                                                                                                                                                                                                                                                                                                                                                                                                                                                              |                                                                                                                                                                                                                                                                                              |
| Factors                                                                     | <input type="checkbox"/> Multiple species/items (specify):<br><input type="checkbox"/> Single species/item (specify)                                                                                                                                                                                                                                                                         |                                                                                                                                                                                                                                                                                                                                                                                                                                                                                                                              |                                                                                                                                                                                                                                                                                              |
| Crop                                                                        | <input checked="" type="checkbox"/> No specific crop(s)<br><input type="checkbox"/> Several crops (e.g. all cereals)<br><input type="checkbox"/> Single crop                                                                                                                                                                                                                                 |                                                                                                                                                                                                                                                                                                                                                                                                                                                                                                                              |                                                                                                                                                                                                                                                                                              |
| Trait /treatment                                                            | <input checked="" type="checkbox"/> No specific traits/treatments<br><input type="checkbox"/> Several traits/treatments<br><input type="checkbox"/> Single trait/treatment                                                                                                                                                                                                                   |                                                                                                                                                                                                                                                                                                                                                                                                                                                                                                                              |                                                                                                                                                                                                                                                                                              |
| GMO                                                                         | <input checked="" type="checkbox"/> No GMO bias<br><input type="checkbox"/> GMO specific                                                                                                                                                                                                                                                                                                     |                                                                                                                                                                                                                                                                                                                                                                                                                                                                                                                              |                                                                                                                                                                                                                                                                                              |
| <b>METHODOLOGY</b>                                                          |                                                                                                                                                                                                                                                                                                                                                                                              |                                                                                                                                                                                                                                                                                                                                                                                                                                                                                                                              |                                                                                                                                                                                                                                                                                              |
| Observations                                                                | <input type="checkbox"/> Reported, verifiable methodology<br><input type="checkbox"/> Reported, unverifiable methodology                                                                                                                                                                                                                                                                     |                                                                                                                                                                                                                                                                                                                                                                                                                                                                                                                              |                                                                                                                                                                                                                                                                                              |

|                       |                                                                                                                                                                                                                                                             |
|-----------------------|-------------------------------------------------------------------------------------------------------------------------------------------------------------------------------------------------------------------------------------------------------------|
|                       | <input checked="" type="checkbox"/> Unknown, unverifiable methodology                                                                                                                                                                                       |
| Frequency             | <input type="checkbox"/> > 1 time/year<br><input type="checkbox"/> 1 time/year<br><input type="checkbox"/> < 1 time/year                                                                                                                                    |
| Future                | <input type="checkbox"/> For ≥ 5 years<br><input type="checkbox"/> between 1 and 5 years<br><input type="checkbox"/> no prospect                                                                                                                            |
| Quality of performers | <input type="checkbox"/> Trained, professionals<br><input type="checkbox"/> Trained, non-professionals – training by documentation, volunteers<br><input type="checkbox"/> Uncertain or not -specified                                                      |
| Quality of data       | <input type="checkbox"/> Standard recording of raw data<br><input type="checkbox"/> Free recording of raw data<br><input type="checkbox"/> Anecdotic                                                                                                        |
| Analysis              | <input type="checkbox"/> Reported, verifiable methodology<br><input type="checkbox"/> Reported, unverifiable methodology<br><input type="checkbox"/> Unknown, unverifiable methodology                                                                      |
| Quality of analysis   | <input type="checkbox"/> Scientifically based<br><input type="checkbox"/> Indicative only<br><input type="checkbox"/> Unknown                                                                                                                               |
| <b>REPORTING</b>      |                                                                                                                                                                                                                                                             |
| Language              | Reporting language(s): Czech                                                                                                                                                                                                                                |
| Availability          | <input type="checkbox"/> Scientific publication<br><input type="checkbox"/> Official report available on the internet or in other public forum<br><input type="checkbox"/> Official report available from network<br><input type="checkbox"/> Not available |
| Frequency             | <input type="checkbox"/> ≥ 1 time/year – bulletins on several topics<br><input type="checkbox"/> < 1 time/year – review reports over several years                                                                                                          |
| Historical reference  | <input checked="" type="checkbox"/> over ≥ 5 years<br><input type="checkbox"/> between 1 and 5 years<br><input type="checkbox"/> no historical analysis                                                                                                     |
| <b>COMMENT(S)</b>     |                                                                                                                                                                                                                                                             |
| None                  |                                                                                                                                                                                                                                                             |

## GSEN-09-0012.00.3 CZ – Society for the Protection of butterflies

| EuropaBio's coordinated approach to General Surveillance: Existing Networks |                                                                                                                                                                                                                                                                                                                                                                                              |                                                                                                                                                                                                                                                                                                                                                                                                                                                                                                                                          |                                                                                                                                                                                                                                                                                              |
|-----------------------------------------------------------------------------|----------------------------------------------------------------------------------------------------------------------------------------------------------------------------------------------------------------------------------------------------------------------------------------------------------------------------------------------------------------------------------------------|------------------------------------------------------------------------------------------------------------------------------------------------------------------------------------------------------------------------------------------------------------------------------------------------------------------------------------------------------------------------------------------------------------------------------------------------------------------------------------------------------------------------------------------|----------------------------------------------------------------------------------------------------------------------------------------------------------------------------------------------------------------------------------------------------------------------------------------------|
| ORGANISATION                                                                |                                                                                                                                                                                                                                                                                                                                                                                              |                                                                                                                                                                                                                                                                                                                                                                                                                                                                                                                                          |                                                                                                                                                                                                                                                                                              |
| EuropaBio reference                                                         | GS-EN-09-0012                                                                                                                                                                                                                                                                                                                                                                                |                                                                                                                                                                                                                                                                                                                                                                                                                                                                                                                                          |                                                                                                                                                                                                                                                                                              |
| Official name of the Network                                                | Společnost pro ochranu motýlů                                                                                                                                                                                                                                                                                                                                                                |                                                                                                                                                                                                                                                                                                                                                                                                                                                                                                                                          |                                                                                                                                                                                                                                                                                              |
| Other names                                                                 | SOM<br>Society for the Protection of butterflies                                                                                                                                                                                                                                                                                                                                             |                                                                                                                                                                                                                                                                                                                                                                                                                                                                                                                                          |                                                                                                                                                                                                                                                                                              |
| Type of organisation                                                        | Nature conservation<br>Founded (unknown)                                                                                                                                                                                                                                                                                                                                                     |                                                                                                                                                                                                                                                                                                                                                                                                                                                                                                                                          |                                                                                                                                                                                                                                                                                              |
| Coordinates                                                                 | Mapping butterflies CR<br>BC Institute of Entomology ASCR<br>Braníšovská 31<br>Budějovice 370 05<br>email: <a href="mailto:info[at]lepidoptera.cz">info[at]lepidoptera.cz</a><br><br>Society for the Protection of butterflies (SOM)<br>Krakovany 27,<br>Krakovany 281 27                                                                                                                    |                                                                                                                                                                                                                                                                                                                                                                                                                                                                                                                                          |                                                                                                                                                                                                                                                                                              |
| Website                                                                     | <a href="http://www.lepidoptera.cz/">http://www.lepidoptera.cz/</a>                                                                                                                                                                                                                                                                                                                          |                                                                                                                                                                                                                                                                                                                                                                                                                                                                                                                                          |                                                                                                                                                                                                                                                                                              |
| Funding                                                                     | Not known                                                                                                                                                                                                                                                                                                                                                                                    |                                                                                                                                                                                                                                                                                                                                                                                                                                                                                                                                          |                                                                                                                                                                                                                                                                                              |
| Conflict of interest                                                        | -                                                                                                                                                                                                                                                                                                                                                                                            |                                                                                                                                                                                                                                                                                                                                                                                                                                                                                                                                          |                                                                                                                                                                                                                                                                                              |
| Part of other network(s)                                                    | Collaborates with or works for government bodies, non-governmental conservation organizations, businesses and other institutions                                                                                                                                                                                                                                                             |                                                                                                                                                                                                                                                                                                                                                                                                                                                                                                                                          |                                                                                                                                                                                                                                                                                              |
| Grouping other network(s)                                                   | -                                                                                                                                                                                                                                                                                                                                                                                            |                                                                                                                                                                                                                                                                                                                                                                                                                                                                                                                                          |                                                                                                                                                                                                                                                                                              |
| MONITORING SUBJECT                                                          |                                                                                                                                                                                                                                                                                                                                                                                              |                                                                                                                                                                                                                                                                                                                                                                                                                                                                                                                                          |                                                                                                                                                                                                                                                                                              |
| Description                                                                 | Monitoring and collecting distribution data of butterflies                                                                                                                                                                                                                                                                                                                                   |                                                                                                                                                                                                                                                                                                                                                                                                                                                                                                                                          |                                                                                                                                                                                                                                                                                              |
| Protection goal(s) and/or influencing factor(s)                             | <input checked="" type="checkbox"/> Protection goal<br><br><input checked="" type="checkbox"/> Biodiversity: Butterflies<br><input type="checkbox"/> Human Health<br><input type="checkbox"/> Animal Health<br><input type="checkbox"/> Plant Health<br><input type="checkbox"/> Soil function<br><input type="checkbox"/> Water quality<br><input type="checkbox"/> Sustainable Agriculture | <input type="checkbox"/> Influencing factor<br><br><input type="checkbox"/> Agronomic practice<br><input type="checkbox"/> Plant protection<br><input type="checkbox"/> GMO cultivation<br><input type="checkbox"/> Environmental conditions                                                                                                                                                                                                                                                                                             |                                                                                                                                                                                                                                                                                              |
| Duplication of Farmer's questionnaire                                       | <input checked="" type="checkbox"/> No duplication<br><input type="checkbox"/> Partly duplication<br><input type="checkbox"/> Complete duplication                                                                                                                                                                                                                                           |                                                                                                                                                                                                                                                                                                                                                                                                                                                                                                                                          |                                                                                                                                                                                                                                                                                              |
| SPECIFICITY                                                                 |                                                                                                                                                                                                                                                                                                                                                                                              |                                                                                                                                                                                                                                                                                                                                                                                                                                                                                                                                          |                                                                                                                                                                                                                                                                                              |
| Geography                                                                   | <input type="checkbox"/> EU -wide                                                                                                                                                                                                                                                                                                                                                            |                                                                                                                                                                                                                                                                                                                                                                                                                                                                                                                                          |                                                                                                                                                                                                                                                                                              |
|                                                                             | <input type="checkbox"/> Zone A – North                                                                                                                                                                                                                                                                                                                                                      | <input checked="" type="checkbox"/> Zone B – Centre:                                                                                                                                                                                                                                                                                                                                                                                                                                                                                     | <input type="checkbox"/> Zone C – South                                                                                                                                                                                                                                                      |
|                                                                             | <input type="checkbox"/> Denmark,<br><input type="checkbox"/> Estonia,<br><input type="checkbox"/> Latvia,<br><input type="checkbox"/> Lithuania,<br><input type="checkbox"/> Finland,<br><input type="checkbox"/> Sweden                                                                                                                                                                    | <input type="checkbox"/> Belgium,<br><input checked="" type="checkbox"/> Czech Republic,<br><input type="checkbox"/> Germany,<br><input type="checkbox"/> Ireland,<br><input type="checkbox"/> Luxembourg,<br><input type="checkbox"/> Hungary,<br><input checked="" type="checkbox"/> Netherlands,<br><input type="checkbox"/> Austria,<br><input type="checkbox"/> Poland,<br><input type="checkbox"/> Romania,<br><input type="checkbox"/> Slovenia,<br><input type="checkbox"/> Slovakia,<br><input type="checkbox"/> United Kingdom | <input type="checkbox"/> Bulgaria,<br><input type="checkbox"/> Greece,<br><input type="checkbox"/> Spain,<br><input type="checkbox"/> France,<br><input type="checkbox"/> Italy,<br><input type="checkbox"/> Cyprus,<br><input type="checkbox"/> Malta,<br><input type="checkbox"/> Portugal |
|                                                                             | <input type="checkbox"/> Regional (specify)<br><input type="checkbox"/> Local (specify)                                                                                                                                                                                                                                                                                                      |                                                                                                                                                                                                                                                                                                                                                                                                                                                                                                                                          |                                                                                                                                                                                                                                                                                              |
| Factors                                                                     | <input checked="" type="checkbox"/> Multiple species/items (specify): butterflies and moths<br><input type="checkbox"/> Single species/item (specify)                                                                                                                                                                                                                                        |                                                                                                                                                                                                                                                                                                                                                                                                                                                                                                                                          |                                                                                                                                                                                                                                                                                              |
| Crop                                                                        | <input checked="" type="checkbox"/> No specific crop(s)<br><input type="checkbox"/> Several crops (e.g. all cereals)<br><input type="checkbox"/> Single crop                                                                                                                                                                                                                                 |                                                                                                                                                                                                                                                                                                                                                                                                                                                                                                                                          |                                                                                                                                                                                                                                                                                              |
| Trait /treatment                                                            | <input checked="" type="checkbox"/> No specific traits/treatments<br><input type="checkbox"/> Several traits/treatments<br><input type="checkbox"/> Single trait/treatment                                                                                                                                                                                                                   |                                                                                                                                                                                                                                                                                                                                                                                                                                                                                                                                          |                                                                                                                                                                                                                                                                                              |

|                                                                                                                   |                                                                                                                                                                                                                                                                                                                                   |
|-------------------------------------------------------------------------------------------------------------------|-----------------------------------------------------------------------------------------------------------------------------------------------------------------------------------------------------------------------------------------------------------------------------------------------------------------------------------|
| GMO                                                                                                               | <input checked="" type="checkbox"/> No GMO bias<br><input type="checkbox"/> GMO specific                                                                                                                                                                                                                                          |
| <b>METHODOLOGY</b>                                                                                                |                                                                                                                                                                                                                                                                                                                                   |
| Observations                                                                                                      | <input checked="" type="checkbox"/> Reported, verifiable methodology<br><input type="checkbox"/> Reported, unverifiable methodology<br><input type="checkbox"/> Unknown, unverifiable methodology                                                                                                                                 |
| Frequency                                                                                                         | <input checked="" type="checkbox"/> > 1 time/year<br><input type="checkbox"/> 1 time/year<br><input type="checkbox"/> < 1 time/year                                                                                                                                                                                               |
| Future                                                                                                            | <input type="checkbox"/> For ≥ 5 years<br><input type="checkbox"/> between 1 and 5 years<br><input type="checkbox"/> no prospect                                                                                                                                                                                                  |
| Quality of performers                                                                                             | <input type="checkbox"/> Trained, professionals<br><input checked="" type="checkbox"/> Trained, non-professionals – more than 400 highly skilled volunteers; written guidelines<br><input type="checkbox"/> Uncertain or not -specified                                                                                           |
| Quality of data                                                                                                   | <input checked="" type="checkbox"/> Standard recording of raw data<br><input type="checkbox"/> Free recording of raw data<br><input type="checkbox"/> Anecdotic                                                                                                                                                                   |
| Analysis                                                                                                          | <input type="checkbox"/> Reported, verifiable methodology<br><input type="checkbox"/> Reported, unverifiable methodology<br><input type="checkbox"/> Unknown, unverifiable methodology                                                                                                                                            |
| Quality of analysis                                                                                               | <input type="checkbox"/> Scientifically based<br><input type="checkbox"/> Indicative only<br><input type="checkbox"/> Unknown                                                                                                                                                                                                     |
| <b>REPORTING</b>                                                                                                  |                                                                                                                                                                                                                                                                                                                                   |
| Language                                                                                                          | Reporting language(s): Czech, English                                                                                                                                                                                                                                                                                             |
| Availability                                                                                                      | <input checked="" type="checkbox"/> Scientific publication<br><input checked="" type="checkbox"/> Official report available on the internet or in other public forum: lists<br><input checked="" type="checkbox"/> Official report available from network: butterfly atlas, other books<br><input type="checkbox"/> Not available |
| Frequency                                                                                                         | <input checked="" type="checkbox"/> ≥ 1 time/year – continuously updated list of presence<br><input checked="" type="checkbox"/> < 1 time/year – books                                                                                                                                                                            |
| Historical reference                                                                                              | <input checked="" type="checkbox"/> over ≥ 5 years<br><input type="checkbox"/> between 1 and 5 years<br><input type="checkbox"/> no historical analysis                                                                                                                                                                           |
| <b>COMMENT(S)</b>                                                                                                 |                                                                                                                                                                                                                                                                                                                                   |
| A broad monitoring network using selected butterfly species as representative indicators and as protection goals. |                                                                                                                                                                                                                                                                                                                                   |

## GSEN-09-0013.00.3 CZ – Czech Society for Ornithology

| EuropaBio's coordinated approach to General Surveillance: Existing Networks |                                                                                                                                                                                                                                                                                                                                                                                                              |                                                                                                                                                                                                                                              |  |                                                                                                                                                                                                                                                                                                                                                                                                                                                                                                                                                                                                 |                                                                                                                                                                                                                                                                                                                                         |
|-----------------------------------------------------------------------------|--------------------------------------------------------------------------------------------------------------------------------------------------------------------------------------------------------------------------------------------------------------------------------------------------------------------------------------------------------------------------------------------------------------|----------------------------------------------------------------------------------------------------------------------------------------------------------------------------------------------------------------------------------------------|--|-------------------------------------------------------------------------------------------------------------------------------------------------------------------------------------------------------------------------------------------------------------------------------------------------------------------------------------------------------------------------------------------------------------------------------------------------------------------------------------------------------------------------------------------------------------------------------------------------|-----------------------------------------------------------------------------------------------------------------------------------------------------------------------------------------------------------------------------------------------------------------------------------------------------------------------------------------|
| ORGANISATION                                                                |                                                                                                                                                                                                                                                                                                                                                                                                              |                                                                                                                                                                                                                                              |  |                                                                                                                                                                                                                                                                                                                                                                                                                                                                                                                                                                                                 |                                                                                                                                                                                                                                                                                                                                         |
| EuropaBio reference                                                         | GS-EN-09-0013                                                                                                                                                                                                                                                                                                                                                                                                |                                                                                                                                                                                                                                              |  |                                                                                                                                                                                                                                                                                                                                                                                                                                                                                                                                                                                                 |                                                                                                                                                                                                                                                                                                                                         |
| Official name of the Network                                                | Česká společnost ornitologická                                                                                                                                                                                                                                                                                                                                                                               |                                                                                                                                                                                                                                              |  |                                                                                                                                                                                                                                                                                                                                                                                                                                                                                                                                                                                                 |                                                                                                                                                                                                                                                                                                                                         |
| Other names                                                                 | CSO<br>Czech Society for Ornithology                                                                                                                                                                                                                                                                                                                                                                         |                                                                                                                                                                                                                                              |  |                                                                                                                                                                                                                                                                                                                                                                                                                                                                                                                                                                                                 |                                                                                                                                                                                                                                                                                                                                         |
| Type of organisation                                                        | Nature conservation<br>Founded 1926<br>Representing BirdLife International in the Czech Republic                                                                                                                                                                                                                                                                                                             |                                                                                                                                                                                                                                              |  |                                                                                                                                                                                                                                                                                                                                                                                                                                                                                                                                                                                                 |                                                                                                                                                                                                                                                                                                                                         |
| Coordinates                                                                 | Na Bělidle 252/34<br>150 00 Praha 5<br>Fax: +420 274 866 700<br>Email: cso[at]birdlife.cz                                                                                                                                                                                                                                                                                                                    |                                                                                                                                                                                                                                              |  |                                                                                                                                                                                                                                                                                                                                                                                                                                                                                                                                                                                                 |                                                                                                                                                                                                                                                                                                                                         |
| Website                                                                     | <a href="http://www.birdlife.cz/index.php">http://www.birdlife.cz/index.php</a>                                                                                                                                                                                                                                                                                                                              |                                                                                                                                                                                                                                              |  |                                                                                                                                                                                                                                                                                                                                                                                                                                                                                                                                                                                                 |                                                                                                                                                                                                                                                                                                                                         |
| Funding                                                                     | 2000 members, donations                                                                                                                                                                                                                                                                                                                                                                                      |                                                                                                                                                                                                                                              |  |                                                                                                                                                                                                                                                                                                                                                                                                                                                                                                                                                                                                 |                                                                                                                                                                                                                                                                                                                                         |
| Conflict of interest                                                        | -                                                                                                                                                                                                                                                                                                                                                                                                            |                                                                                                                                                                                                                                              |  |                                                                                                                                                                                                                                                                                                                                                                                                                                                                                                                                                                                                 |                                                                                                                                                                                                                                                                                                                                         |
| Part of other network(s)                                                    | BirdLife International (GS-EN-09-0152)                                                                                                                                                                                                                                                                                                                                                                       |                                                                                                                                                                                                                                              |  |                                                                                                                                                                                                                                                                                                                                                                                                                                                                                                                                                                                                 |                                                                                                                                                                                                                                                                                                                                         |
| Grouping other network(s)                                                   | 6 regional branches, 3 field stations                                                                                                                                                                                                                                                                                                                                                                        |                                                                                                                                                                                                                                              |  |                                                                                                                                                                                                                                                                                                                                                                                                                                                                                                                                                                                                 |                                                                                                                                                                                                                                                                                                                                         |
| MONITORING SUBJECT                                                          |                                                                                                                                                                                                                                                                                                                                                                                                              |                                                                                                                                                                                                                                              |  |                                                                                                                                                                                                                                                                                                                                                                                                                                                                                                                                                                                                 |                                                                                                                                                                                                                                                                                                                                         |
| Description                                                                 | Runs projects aimed at conservation of birds and their habitats, focusing on education, popularisation and promotion of bird protection.<br>Monitoring and collecting distribution data of birds (arranged per topic).<br>Monitoring project is part of the Pan-European Common Bird Monitoring Project.                                                                                                     |                                                                                                                                                                                                                                              |  |                                                                                                                                                                                                                                                                                                                                                                                                                                                                                                                                                                                                 |                                                                                                                                                                                                                                                                                                                                         |
| Protection goal(s) and/or influencing factor(s)                             | <input checked="" type="checkbox"/> Protection goal<br><br><input checked="" type="checkbox"/> Biodiversity: Birds<br><input type="checkbox"/> Human Health<br><input type="checkbox"/> Animal Health<br><input type="checkbox"/> Plant Health<br><input type="checkbox"/> Soil function<br><input type="checkbox"/> Water quality<br><input type="checkbox"/> Sustainable Agriculture                       | <input type="checkbox"/> Influencing factor<br><br><input type="checkbox"/> Agronomic practice<br><input type="checkbox"/> Plant protection<br><input type="checkbox"/> GMO cultivation<br><input type="checkbox"/> Environmental conditions |  |                                                                                                                                                                                                                                                                                                                                                                                                                                                                                                                                                                                                 |                                                                                                                                                                                                                                                                                                                                         |
| Duplication of Farmer's questionnaire                                       | <input checked="" type="checkbox"/> No duplication<br><input type="checkbox"/> Partly duplication<br><input type="checkbox"/> Complete duplication                                                                                                                                                                                                                                                           |                                                                                                                                                                                                                                              |  |                                                                                                                                                                                                                                                                                                                                                                                                                                                                                                                                                                                                 |                                                                                                                                                                                                                                                                                                                                         |
| SPECIFICITY                                                                 |                                                                                                                                                                                                                                                                                                                                                                                                              |                                                                                                                                                                                                                                              |  |                                                                                                                                                                                                                                                                                                                                                                                                                                                                                                                                                                                                 |                                                                                                                                                                                                                                                                                                                                         |
| Geography                                                                   | <input type="checkbox"/> EU -wide<br><br><input type="checkbox"/> Zone A – North<br><input type="checkbox"/> Denmark,<br><input type="checkbox"/> Estonia,<br><input type="checkbox"/> Latvia,<br><input type="checkbox"/> Lithuania,<br><input type="checkbox"/> Finland,<br><input type="checkbox"/> Sweden<br><br><input type="checkbox"/> Regional (specify)<br><input type="checkbox"/> Local (specify) |                                                                                                                                                                                                                                              |  | <input checked="" type="checkbox"/> Zone B – Centre:<br><input type="checkbox"/> Belgium,<br><input checked="" type="checkbox"/> Czech Republic<br><input type="checkbox"/> Germany,<br><input type="checkbox"/> Ireland,<br><input type="checkbox"/> Luxembourg,<br><input type="checkbox"/> Hungary,<br><input checked="" type="checkbox"/> Netherlands,<br><input type="checkbox"/> Austria,<br><input type="checkbox"/> Poland,<br><input type="checkbox"/> Romania,<br><input type="checkbox"/> Slovenia,<br><input type="checkbox"/> Slovakia,<br><input type="checkbox"/> United Kingdom | <input type="checkbox"/> Zone C – South<br><input type="checkbox"/> Bulgaria,<br><input type="checkbox"/> Greece,<br><input type="checkbox"/> Spain,<br><input type="checkbox"/> France,<br><input type="checkbox"/> Italy,<br><input type="checkbox"/> Cyprus,<br><input type="checkbox"/> Malta,<br><input type="checkbox"/> Portugal |
| Factors                                                                     | <input checked="" type="checkbox"/> Multiple species/items (specify): birds<br><input type="checkbox"/> Single species/item (specify)                                                                                                                                                                                                                                                                        |                                                                                                                                                                                                                                              |  |                                                                                                                                                                                                                                                                                                                                                                                                                                                                                                                                                                                                 |                                                                                                                                                                                                                                                                                                                                         |
| Crop                                                                        | <input checked="" type="checkbox"/> No specific crop(s)<br><input type="checkbox"/> Several crops (e.g. all cereals)<br><input type="checkbox"/> Single crop                                                                                                                                                                                                                                                 |                                                                                                                                                                                                                                              |  |                                                                                                                                                                                                                                                                                                                                                                                                                                                                                                                                                                                                 |                                                                                                                                                                                                                                                                                                                                         |
| Trait /treatment                                                            | <input checked="" type="checkbox"/> No specific traits/treatments<br><input type="checkbox"/> Several traits/treatments<br><input type="checkbox"/> Single trait/treatment                                                                                                                                                                                                                                   |                                                                                                                                                                                                                                              |  |                                                                                                                                                                                                                                                                                                                                                                                                                                                                                                                                                                                                 |                                                                                                                                                                                                                                                                                                                                         |
| GMO                                                                         | <input checked="" type="checkbox"/> No GMO bias                                                                                                                                                                                                                                                                                                                                                              |                                                                                                                                                                                                                                              |  |                                                                                                                                                                                                                                                                                                                                                                                                                                                                                                                                                                                                 |                                                                                                                                                                                                                                                                                                                                         |

|                                                                                                                  |                                                                                                                                                                                                                                                                                                                                                                                     |
|------------------------------------------------------------------------------------------------------------------|-------------------------------------------------------------------------------------------------------------------------------------------------------------------------------------------------------------------------------------------------------------------------------------------------------------------------------------------------------------------------------------|
|                                                                                                                  | <input type="checkbox"/> GMO specific                                                                                                                                                                                                                                                                                                                                               |
| <b>METHODOLOGY</b>                                                                                               |                                                                                                                                                                                                                                                                                                                                                                                     |
| Observations                                                                                                     | <input checked="" type="checkbox"/> Reported, verifiable methodology<br><input type="checkbox"/> Reported, unverifiable methodology<br><input type="checkbox"/> Unknown, unverifiable methodology                                                                                                                                                                                   |
| Frequency                                                                                                        | <input checked="" type="checkbox"/> > 1 time/year: observations of presence<br><input checked="" type="checkbox"/> 1 time/year: program on bird size<br><input type="checkbox"/> < 1 time/year                                                                                                                                                                                      |
| Future                                                                                                           | <input checked="" type="checkbox"/> For $\geq$ 5 years<br><input type="checkbox"/> between 1 and 5 years<br><input type="checkbox"/> no prospect                                                                                                                                                                                                                                    |
| Quality of performers                                                                                            | <input type="checkbox"/> Trained, professionals<br><input checked="" type="checkbox"/> Trained, non-professionals – volunteers; written guidelines<br><input type="checkbox"/> Uncertain or not -specified                                                                                                                                                                          |
| Quality of data                                                                                                  | <input checked="" type="checkbox"/> Standard recording of raw data<br><input type="checkbox"/> Free recording of raw data<br><input type="checkbox"/> Anecdotic                                                                                                                                                                                                                     |
| Analysis                                                                                                         | <input type="checkbox"/> Reported, verifiable methodology<br><input type="checkbox"/> Reported, unverifiable methodology<br><input checked="" type="checkbox"/> Unknown, unverifiable methodology                                                                                                                                                                                   |
| Quality of analysis                                                                                              | <input checked="" type="checkbox"/> Scientifically based<br><input type="checkbox"/> Indicative only<br><input type="checkbox"/> Unknown                                                                                                                                                                                                                                            |
| <b>REPORTING</b>                                                                                                 |                                                                                                                                                                                                                                                                                                                                                                                     |
| Language                                                                                                         | Reporting language(s): Czech, English                                                                                                                                                                                                                                                                                                                                               |
| Availability                                                                                                     | <input checked="" type="checkbox"/> Scientific publication<br><input checked="" type="checkbox"/> Official report available on the internet or in other public forum: lists of observations (daily updated), graphs of trends,<br><input checked="" type="checkbox"/> Official report available from network: reports, periodicals, books<br><input type="checkbox"/> Not available |
| Frequency                                                                                                        | <input checked="" type="checkbox"/> $\geq$ 1 time/year – periodicals: World of the birds, CSO news, Sylvia, Buteo<br><input checked="" type="checkbox"/> < 1 time/year – books                                                                                                                                                                                                      |
| Historical reference                                                                                             | <input checked="" type="checkbox"/> over $\geq$ 5 years<br><input type="checkbox"/> between 1 and 5 years<br><input type="checkbox"/> no historical analysis                                                                                                                                                                                                                        |
| <b>COMMENT(S)</b>                                                                                                |                                                                                                                                                                                                                                                                                                                                                                                     |
| A broad general monitoring network; monitors arrivals of migrating birds, nesting sites, sizes of nesting birds. |                                                                                                                                                                                                                                                                                                                                                                                     |



## GSEN-09-0014.00.1 CZ – National Institute of Public Health

| EuropaBio's coordinated approach to General Surveillance: Existing Networks |                                                                                                                                                                                                                                                                                                                                                                                      |                                                                                                                                                                                                                                                                                                                                                                                                                                                                                                                              |                                                                                                                                                                                                                                                                                              |
|-----------------------------------------------------------------------------|--------------------------------------------------------------------------------------------------------------------------------------------------------------------------------------------------------------------------------------------------------------------------------------------------------------------------------------------------------------------------------------|------------------------------------------------------------------------------------------------------------------------------------------------------------------------------------------------------------------------------------------------------------------------------------------------------------------------------------------------------------------------------------------------------------------------------------------------------------------------------------------------------------------------------|----------------------------------------------------------------------------------------------------------------------------------------------------------------------------------------------------------------------------------------------------------------------------------------------|
| <b>ORGANISATION</b>                                                         |                                                                                                                                                                                                                                                                                                                                                                                      |                                                                                                                                                                                                                                                                                                                                                                                                                                                                                                                              |                                                                                                                                                                                                                                                                                              |
| EuropaBio reference                                                         | GS-EN-09-0014 bis                                                                                                                                                                                                                                                                                                                                                                    |                                                                                                                                                                                                                                                                                                                                                                                                                                                                                                                              |                                                                                                                                                                                                                                                                                              |
| Official name of the Network                                                | Státní zdravotní ústav                                                                                                                                                                                                                                                                                                                                                               |                                                                                                                                                                                                                                                                                                                                                                                                                                                                                                                              |                                                                                                                                                                                                                                                                                              |
| Other names                                                                 | National Institute of Public Health<br>Ministry of Health                                                                                                                                                                                                                                                                                                                            |                                                                                                                                                                                                                                                                                                                                                                                                                                                                                                                              |                                                                                                                                                                                                                                                                                              |
| Type of organisation                                                        | Governmental<br>Founded (unknown); Monitoring since 1991                                                                                                                                                                                                                                                                                                                             |                                                                                                                                                                                                                                                                                                                                                                                                                                                                                                                              |                                                                                                                                                                                                                                                                                              |
| Coordinates                                                                 | National Institute of Health<br>Šrobárova 48<br>Prague 10, 100 42                                                                                                                                                                                                                                                                                                                    |                                                                                                                                                                                                                                                                                                                                                                                                                                                                                                                              |                                                                                                                                                                                                                                                                                              |
| Website                                                                     | <a href="http://www.szu.cz/">http://www.szu.cz/</a>                                                                                                                                                                                                                                                                                                                                  |                                                                                                                                                                                                                                                                                                                                                                                                                                                                                                                              |                                                                                                                                                                                                                                                                                              |
| Funding                                                                     | public                                                                                                                                                                                                                                                                                                                                                                               |                                                                                                                                                                                                                                                                                                                                                                                                                                                                                                                              |                                                                                                                                                                                                                                                                                              |
| Conflict of interest                                                        | -                                                                                                                                                                                                                                                                                                                                                                                    |                                                                                                                                                                                                                                                                                                                                                                                                                                                                                                                              |                                                                                                                                                                                                                                                                                              |
| Part of other network(s)                                                    | -                                                                                                                                                                                                                                                                                                                                                                                    |                                                                                                                                                                                                                                                                                                                                                                                                                                                                                                                              |                                                                                                                                                                                                                                                                                              |
| Grouping other network(s)                                                   |                                                                                                                                                                                                                                                                                                                                                                                      |                                                                                                                                                                                                                                                                                                                                                                                                                                                                                                                              |                                                                                                                                                                                                                                                                                              |
| <b>MONITORING SUBJECT</b>                                                   |                                                                                                                                                                                                                                                                                                                                                                                      |                                                                                                                                                                                                                                                                                                                                                                                                                                                                                                                              |                                                                                                                                                                                                                                                                                              |
| Description                                                                 | Monitoring public health.                                                                                                                                                                                                                                                                                                                                                            |                                                                                                                                                                                                                                                                                                                                                                                                                                                                                                                              |                                                                                                                                                                                                                                                                                              |
| Protection goal(s) and/or influencing factor(s)                             | <input checked="" type="checkbox"/> Protection goal<br><input type="checkbox"/> Biodiversity: general<br><input checked="" type="checkbox"/> Human Health<br><input type="checkbox"/> Animal Health<br><input type="checkbox"/> Plant Health<br><input type="checkbox"/> Soil function<br><input type="checkbox"/> Water quality<br><input type="checkbox"/> Sustainable Agriculture | <input type="checkbox"/> Influencing factor<br><input type="checkbox"/> Agronomic practice<br><input type="checkbox"/> Plant protection<br><input type="checkbox"/> GMO cultivation<br><input type="checkbox"/> Environmental conditions                                                                                                                                                                                                                                                                                     |                                                                                                                                                                                                                                                                                              |
| Duplication of Farmer's questionnaire                                       | <input checked="" type="checkbox"/> No duplication<br><input type="checkbox"/> Partly duplication<br><input type="checkbox"/> Complete duplication                                                                                                                                                                                                                                   |                                                                                                                                                                                                                                                                                                                                                                                                                                                                                                                              |                                                                                                                                                                                                                                                                                              |
| <b>SPECIFICITY</b>                                                          |                                                                                                                                                                                                                                                                                                                                                                                      |                                                                                                                                                                                                                                                                                                                                                                                                                                                                                                                              |                                                                                                                                                                                                                                                                                              |
| Geography                                                                   | <input type="checkbox"/> EU –wide<br><input type="checkbox"/> Zone A – North<br><input checked="" type="checkbox"/> Zone B – Centre:<br><input type="checkbox"/> Zone C – South                                                                                                                                                                                                      |                                                                                                                                                                                                                                                                                                                                                                                                                                                                                                                              |                                                                                                                                                                                                                                                                                              |
|                                                                             | <input type="checkbox"/> Denmark,<br><input type="checkbox"/> Estonia,<br><input type="checkbox"/> Latvia,<br><input type="checkbox"/> Lithuania,<br><input type="checkbox"/> Finland,<br><input type="checkbox"/> Sweden                                                                                                                                                            | <input type="checkbox"/> Belgium,<br><input checked="" type="checkbox"/> Czech Republic<br><input type="checkbox"/> Germany,<br><input type="checkbox"/> Ireland,<br><input type="checkbox"/> Luxembourg,<br><input type="checkbox"/> Hungary,<br><input type="checkbox"/> Netherlands,<br><input type="checkbox"/> Austria,<br><input type="checkbox"/> Poland,<br><input type="checkbox"/> Romania,<br><input type="checkbox"/> Slovenia,<br><input type="checkbox"/> Slovakia,<br><input type="checkbox"/> United Kingdom | <input type="checkbox"/> Bulgaria,<br><input type="checkbox"/> Greece,<br><input type="checkbox"/> Spain,<br><input type="checkbox"/> France,<br><input type="checkbox"/> Italy,<br><input type="checkbox"/> Cyprus,<br><input type="checkbox"/> Malta,<br><input type="checkbox"/> Portugal |
|                                                                             | <input type="checkbox"/> Regional (specify)<br><input type="checkbox"/> Local (specify)                                                                                                                                                                                                                                                                                              |                                                                                                                                                                                                                                                                                                                                                                                                                                                                                                                              |                                                                                                                                                                                                                                                                                              |
| Factors                                                                     | <input checked="" type="checkbox"/> Multiple species/items (specify): water, air, noise, food, ...<br><input type="checkbox"/> Single species/item (specify)                                                                                                                                                                                                                         |                                                                                                                                                                                                                                                                                                                                                                                                                                                                                                                              |                                                                                                                                                                                                                                                                                              |
| Crop                                                                        | <input checked="" type="checkbox"/> No specific crop(s)<br><input type="checkbox"/> Several crops (e.g. all cereals)<br><input type="checkbox"/> Single crop                                                                                                                                                                                                                         |                                                                                                                                                                                                                                                                                                                                                                                                                                                                                                                              |                                                                                                                                                                                                                                                                                              |
| Trait /treatment                                                            | <input checked="" type="checkbox"/> No specific traits/treatments<br><input type="checkbox"/> Several traits/treatments<br><input type="checkbox"/> Single trait/treatment                                                                                                                                                                                                           |                                                                                                                                                                                                                                                                                                                                                                                                                                                                                                                              |                                                                                                                                                                                                                                                                                              |
| GMO                                                                         | <input checked="" type="checkbox"/> No GMO bias<br><input type="checkbox"/> GMO specific                                                                                                                                                                                                                                                                                             |                                                                                                                                                                                                                                                                                                                                                                                                                                                                                                                              |                                                                                                                                                                                                                                                                                              |
| <b>METHODOLOGY</b>                                                          |                                                                                                                                                                                                                                                                                                                                                                                      |                                                                                                                                                                                                                                                                                                                                                                                                                                                                                                                              |                                                                                                                                                                                                                                                                                              |
| Observations                                                                | <input checked="" type="checkbox"/> Reported, verifiable methodology                                                                                                                                                                                                                                                                                                                 |                                                                                                                                                                                                                                                                                                                                                                                                                                                                                                                              |                                                                                                                                                                                                                                                                                              |

|                                                                                                                                                                                                                                                                              |                                                                                                                                                                                                                                                                                                     |
|------------------------------------------------------------------------------------------------------------------------------------------------------------------------------------------------------------------------------------------------------------------------------|-----------------------------------------------------------------------------------------------------------------------------------------------------------------------------------------------------------------------------------------------------------------------------------------------------|
|                                                                                                                                                                                                                                                                              | <input type="checkbox"/> Reported, unverifiable methodology<br><input type="checkbox"/> Unknown, unverifiable methodology                                                                                                                                                                           |
| Frequency                                                                                                                                                                                                                                                                    | <input type="checkbox"/> > 1 time/year:<br><input checked="" type="checkbox"/> 1 time/year:<br><input type="checkbox"/> < 1 time/year                                                                                                                                                               |
| Future                                                                                                                                                                                                                                                                       | <input checked="" type="checkbox"/> For ≥ 5 years<br><input type="checkbox"/> between 1 and 5 years<br><input type="checkbox"/> no prospect                                                                                                                                                         |
| Quality of performers                                                                                                                                                                                                                                                        | <input checked="" type="checkbox"/> Trained, professionals<br><input type="checkbox"/> Trained, non-professionals – volunteers<br><input type="checkbox"/> Uncertain or not –specified                                                                                                              |
| Quality of data                                                                                                                                                                                                                                                              | <input checked="" type="checkbox"/> Standard recording of raw data<br><input type="checkbox"/> Free recording of raw data<br><input type="checkbox"/> Anecdotic                                                                                                                                     |
| Analysis                                                                                                                                                                                                                                                                     | <input checked="" type="checkbox"/> Reported, verifiable methodology<br><input type="checkbox"/> Reported, unverifiable methodology<br><input type="checkbox"/> Unknown, unverifiable methodology                                                                                                   |
| Quality of analysis                                                                                                                                                                                                                                                          | <input checked="" type="checkbox"/> Scientifically based<br><input type="checkbox"/> Indicative only<br><input type="checkbox"/> Unknown                                                                                                                                                            |
| <b>REPORTING</b>                                                                                                                                                                                                                                                             |                                                                                                                                                                                                                                                                                                     |
| Language                                                                                                                                                                                                                                                                     | <input type="checkbox"/> Specify reporting language(s): Czech / English                                                                                                                                                                                                                             |
| Availability                                                                                                                                                                                                                                                                 | <input type="checkbox"/> Scientific publication<br><input checked="" type="checkbox"/> Official report (not yet) available on the internet or in other public forum: graphs on website<br><input type="checkbox"/> Official report available from network<br><input type="checkbox"/> Not available |
| Frequency                                                                                                                                                                                                                                                                    | <input checked="" type="checkbox"/> ≥ 1 time/year –<br><input type="checkbox"/> < 1 time/year –                                                                                                                                                                                                     |
| Historical reference                                                                                                                                                                                                                                                         | <input checked="" type="checkbox"/> over ≥ 5 years<br><input type="checkbox"/> between 1 and 5 years<br><input type="checkbox"/> no historical analysis                                                                                                                                             |
| <b>COMMENT(S)</b>                                                                                                                                                                                                                                                            |                                                                                                                                                                                                                                                                                                     |
| The 2012 report (Czech/English) is available at: <a href="http://www.szu.cz/topics/environmental-health/environmental-health-monitoring">http://www.szu.cz/topics/environmental-health/environmental-health-monitoring</a> ; with a subchapter on GM foods (presence of GM). |                                                                                                                                                                                                                                                                                                     |

## GSEN-09-0014.00.2 CZ – National Public Health Service

| EuropaBio's coordinated approach to General Surveillance: Existing Networks |                                                                                                                                                                                                                                                                                                                                                                                      |                                                                                                                                                                                                                                                                                                                                                                                                                                                                                                                              |                                                                                                                                                                                                                                                                                              |
|-----------------------------------------------------------------------------|--------------------------------------------------------------------------------------------------------------------------------------------------------------------------------------------------------------------------------------------------------------------------------------------------------------------------------------------------------------------------------------|------------------------------------------------------------------------------------------------------------------------------------------------------------------------------------------------------------------------------------------------------------------------------------------------------------------------------------------------------------------------------------------------------------------------------------------------------------------------------------------------------------------------------|----------------------------------------------------------------------------------------------------------------------------------------------------------------------------------------------------------------------------------------------------------------------------------------------|
| <b>ORGANISATION</b>                                                         |                                                                                                                                                                                                                                                                                                                                                                                      |                                                                                                                                                                                                                                                                                                                                                                                                                                                                                                                              |                                                                                                                                                                                                                                                                                              |
| EuropaBio reference                                                         | GS-EN-09-0014                                                                                                                                                                                                                                                                                                                                                                        |                                                                                                                                                                                                                                                                                                                                                                                                                                                                                                                              |                                                                                                                                                                                                                                                                                              |
| Official name of the Network                                                | Ministerstvo zdravotnictví                                                                                                                                                                                                                                                                                                                                                           |                                                                                                                                                                                                                                                                                                                                                                                                                                                                                                                              |                                                                                                                                                                                                                                                                                              |
| Other names                                                                 | Ministry of Health: chief health officer and hygienic stations                                                                                                                                                                                                                                                                                                                       |                                                                                                                                                                                                                                                                                                                                                                                                                                                                                                                              |                                                                                                                                                                                                                                                                                              |
| Type of organisation                                                        | Governmental                                                                                                                                                                                                                                                                                                                                                                         |                                                                                                                                                                                                                                                                                                                                                                                                                                                                                                                              |                                                                                                                                                                                                                                                                                              |
| Coordinates                                                                 | Palackého nám. 4<br>128 01 Praha 2                                                                                                                                                                                                                                                                                                                                                   |                                                                                                                                                                                                                                                                                                                                                                                                                                                                                                                              |                                                                                                                                                                                                                                                                                              |
| Website                                                                     | <a href="http://www.mzcr.cz">http://www.mzcr.cz</a>                                                                                                                                                                                                                                                                                                                                  |                                                                                                                                                                                                                                                                                                                                                                                                                                                                                                                              |                                                                                                                                                                                                                                                                                              |
| Funding                                                                     | public                                                                                                                                                                                                                                                                                                                                                                               |                                                                                                                                                                                                                                                                                                                                                                                                                                                                                                                              |                                                                                                                                                                                                                                                                                              |
| Conflict of interest                                                        | -                                                                                                                                                                                                                                                                                                                                                                                    |                                                                                                                                                                                                                                                                                                                                                                                                                                                                                                                              |                                                                                                                                                                                                                                                                                              |
| Part of other network(s)                                                    | --                                                                                                                                                                                                                                                                                                                                                                                   |                                                                                                                                                                                                                                                                                                                                                                                                                                                                                                                              |                                                                                                                                                                                                                                                                                              |
| Grouping other network(s)                                                   | through<br>-Chief Health Officer and hygienic stations<br>-National Institute of Public Health                                                                                                                                                                                                                                                                                       |                                                                                                                                                                                                                                                                                                                                                                                                                                                                                                                              |                                                                                                                                                                                                                                                                                              |
| <b>MONITORING SUBJECT</b>                                                   |                                                                                                                                                                                                                                                                                                                                                                                      |                                                                                                                                                                                                                                                                                                                                                                                                                                                                                                                              |                                                                                                                                                                                                                                                                                              |
| Description                                                                 | Monitoring public health.                                                                                                                                                                                                                                                                                                                                                            |                                                                                                                                                                                                                                                                                                                                                                                                                                                                                                                              |                                                                                                                                                                                                                                                                                              |
| Protection goal(s) and/or influencing factor(s)                             | <input checked="" type="checkbox"/> Protection goal<br><input type="checkbox"/> Biodiversity: general<br><input checked="" type="checkbox"/> Human Health<br><input type="checkbox"/> Animal Health<br><input type="checkbox"/> Plant Health<br><input type="checkbox"/> Soil function<br><input type="checkbox"/> Water quality<br><input type="checkbox"/> Sustainable Agriculture | <input type="checkbox"/> Influencing factor<br><input type="checkbox"/> Agronomic practice<br><input type="checkbox"/> Plant protection<br><input type="checkbox"/> GMO cultivation<br><input type="checkbox"/> Environmental conditions                                                                                                                                                                                                                                                                                     |                                                                                                                                                                                                                                                                                              |
| Duplication of Farmer's questionnaire                                       | <input checked="" type="checkbox"/> No duplication<br><input type="checkbox"/> Partly duplication<br><input type="checkbox"/> Complete duplication                                                                                                                                                                                                                                   |                                                                                                                                                                                                                                                                                                                                                                                                                                                                                                                              |                                                                                                                                                                                                                                                                                              |
| <b>SPECIFICITY</b>                                                          |                                                                                                                                                                                                                                                                                                                                                                                      |                                                                                                                                                                                                                                                                                                                                                                                                                                                                                                                              |                                                                                                                                                                                                                                                                                              |
| Geography                                                                   | <input type="checkbox"/> EU –wide<br><input type="checkbox"/> Zone A – North<br><input checked="" type="checkbox"/> Zone B – Centre:<br><input type="checkbox"/> Zone C – South                                                                                                                                                                                                      |                                                                                                                                                                                                                                                                                                                                                                                                                                                                                                                              |                                                                                                                                                                                                                                                                                              |
|                                                                             | <input type="checkbox"/> Denmark,<br><input type="checkbox"/> Estonia,<br><input type="checkbox"/> Latvia,<br><input type="checkbox"/> Lithuania,<br><input type="checkbox"/> Finland,<br><input type="checkbox"/> Sweden                                                                                                                                                            | <input type="checkbox"/> Belgium,<br><input checked="" type="checkbox"/> Czech Republic<br><input type="checkbox"/> Germany,<br><input type="checkbox"/> Ireland,<br><input type="checkbox"/> Luxembourg,<br><input type="checkbox"/> Hungary,<br><input type="checkbox"/> Netherlands,<br><input type="checkbox"/> Austria,<br><input type="checkbox"/> Poland,<br><input type="checkbox"/> Romania,<br><input type="checkbox"/> Slovenia,<br><input type="checkbox"/> Slovakia,<br><input type="checkbox"/> United Kingdom | <input type="checkbox"/> Bulgaria,<br><input type="checkbox"/> Greece,<br><input type="checkbox"/> Spain,<br><input type="checkbox"/> France,<br><input type="checkbox"/> Italy,<br><input type="checkbox"/> Cyprus,<br><input type="checkbox"/> Malta,<br><input type="checkbox"/> Portugal |
|                                                                             | <input type="checkbox"/> Regional (specify)<br><input type="checkbox"/> Local (specify)                                                                                                                                                                                                                                                                                              |                                                                                                                                                                                                                                                                                                                                                                                                                                                                                                                              |                                                                                                                                                                                                                                                                                              |
| Factors                                                                     | <input type="checkbox"/> Multiple species/items (specify):<br><input type="checkbox"/> Single species/item (specify)                                                                                                                                                                                                                                                                 |                                                                                                                                                                                                                                                                                                                                                                                                                                                                                                                              |                                                                                                                                                                                                                                                                                              |
| Crop                                                                        | <input type="checkbox"/> No specific crop(s)<br><input type="checkbox"/> Several crops (e.g. all cereals)<br><input type="checkbox"/> Single crop                                                                                                                                                                                                                                    |                                                                                                                                                                                                                                                                                                                                                                                                                                                                                                                              |                                                                                                                                                                                                                                                                                              |
| Trait /treatment                                                            | <input type="checkbox"/> No specific traits/treatments<br><input type="checkbox"/> Several traits/treatments<br><input type="checkbox"/> Single trait/treatment                                                                                                                                                                                                                      |                                                                                                                                                                                                                                                                                                                                                                                                                                                                                                                              |                                                                                                                                                                                                                                                                                              |
| GMO                                                                         | <input type="checkbox"/> No GMO bias<br><input type="checkbox"/> GMO specific                                                                                                                                                                                                                                                                                                        |                                                                                                                                                                                                                                                                                                                                                                                                                                                                                                                              |                                                                                                                                                                                                                                                                                              |
| <b>METHODOLOGY</b>                                                          |                                                                                                                                                                                                                                                                                                                                                                                      |                                                                                                                                                                                                                                                                                                                                                                                                                                                                                                                              |                                                                                                                                                                                                                                                                                              |
| Observations                                                                | <input type="checkbox"/> Reported, verifiable methodology                                                                                                                                                                                                                                                                                                                            |                                                                                                                                                                                                                                                                                                                                                                                                                                                                                                                              |                                                                                                                                                                                                                                                                                              |

|                       |                                                                                                                                                                                                                                                                                                     |
|-----------------------|-----------------------------------------------------------------------------------------------------------------------------------------------------------------------------------------------------------------------------------------------------------------------------------------------------|
|                       | <input type="checkbox"/> Reported, unverifiable methodology<br><input type="checkbox"/> Unknown, unverifiable methodology                                                                                                                                                                           |
| Frequency             | <input type="checkbox"/> > 1 time/year:<br><input type="checkbox"/> 1 time/year:<br><input type="checkbox"/> < 1 time/year                                                                                                                                                                          |
| Future                | <input type="checkbox"/> For ≥ 5 years<br><input type="checkbox"/> between 1 and 5 years<br><input type="checkbox"/> no prospect                                                                                                                                                                    |
| Quality of performers | <input type="checkbox"/> Trained, professionals<br><input type="checkbox"/> Trained, non-professionals – volunteers<br><input type="checkbox"/> Uncertain or not –specified                                                                                                                         |
| Quality of data       | <input type="checkbox"/> Standard recording of raw data<br><input type="checkbox"/> Free recording of raw data<br><input type="checkbox"/> Anecdotic                                                                                                                                                |
| Analysis              | <input type="checkbox"/> Reported, verifiable methodology<br><input type="checkbox"/> Reported, unverifiable methodology<br><input type="checkbox"/> Unknown, unverifiable methodology                                                                                                              |
| Quality of analysis   | <input type="checkbox"/> Scientifically based<br><input type="checkbox"/> Indicative only<br><input type="checkbox"/> Unknown                                                                                                                                                                       |
| <b>REPORTING</b>      |                                                                                                                                                                                                                                                                                                     |
| Language              | <input type="checkbox"/> Specify reporting language(s):                                                                                                                                                                                                                                             |
| Availability          | <input type="checkbox"/> Scientific publication<br><input checked="" type="checkbox"/> Official report (not yet) available on the internet or in other public forum: graphs on website<br><input type="checkbox"/> Official report available from network<br><input type="checkbox"/> Not available |
| Frequency             | <input type="checkbox"/> ≥ 1 time/year –<br><input type="checkbox"/> < 1 time/year –                                                                                                                                                                                                                |
| Historical reference  | <input type="checkbox"/> over ≥ 5 years<br><input type="checkbox"/> between 1 and 5 years<br><input type="checkbox"/> no historical analysis                                                                                                                                                        |
| <b>COMMENT(S)</b>     |                                                                                                                                                                                                                                                                                                     |
| None                  |                                                                                                                                                                                                                                                                                                     |

## European Union

## GSEN-09-0082.00.1 EU – RASFF

| EuropaBio's coordinated approach to General Surveillance: Existing Networks |                                                                                                                                                                                                                                                                                                                                                                                        |                                                                                                                                                                                                                                                                                                                                                                                                                                                                                                                   |                                                                                                                                                                                                                                                                                              |
|-----------------------------------------------------------------------------|----------------------------------------------------------------------------------------------------------------------------------------------------------------------------------------------------------------------------------------------------------------------------------------------------------------------------------------------------------------------------------------|-------------------------------------------------------------------------------------------------------------------------------------------------------------------------------------------------------------------------------------------------------------------------------------------------------------------------------------------------------------------------------------------------------------------------------------------------------------------------------------------------------------------|----------------------------------------------------------------------------------------------------------------------------------------------------------------------------------------------------------------------------------------------------------------------------------------------|
| <b>ORGANISATION</b>                                                         |                                                                                                                                                                                                                                                                                                                                                                                        |                                                                                                                                                                                                                                                                                                                                                                                                                                                                                                                   |                                                                                                                                                                                                                                                                                              |
| EuropaBio reference                                                         | GS-EN-09-0082                                                                                                                                                                                                                                                                                                                                                                          |                                                                                                                                                                                                                                                                                                                                                                                                                                                                                                                   |                                                                                                                                                                                                                                                                                              |
| Official name of the Network                                                | <b>Rapid Alert System for Food and Feed</b>                                                                                                                                                                                                                                                                                                                                            |                                                                                                                                                                                                                                                                                                                                                                                                                                                                                                                   |                                                                                                                                                                                                                                                                                              |
| Other names                                                                 | RASFF, EC Rapid Alert System for Food and Feed                                                                                                                                                                                                                                                                                                                                         |                                                                                                                                                                                                                                                                                                                                                                                                                                                                                                                   |                                                                                                                                                                                                                                                                                              |
| Type of organisation                                                        | Governmental<br>Founded 1979                                                                                                                                                                                                                                                                                                                                                           |                                                                                                                                                                                                                                                                                                                                                                                                                                                                                                                   |                                                                                                                                                                                                                                                                                              |
| Coordinates                                                                 |                                                                                                                                                                                                                                                                                                                                                                                        |                                                                                                                                                                                                                                                                                                                                                                                                                                                                                                                   |                                                                                                                                                                                                                                                                                              |
| Website                                                                     | <a href="http://ec.europa.eu/food/food/rapidalert/index_en.htm">http://ec.europa.eu/food/food/rapidalert/index_en.htm</a>                                                                                                                                                                                                                                                              |                                                                                                                                                                                                                                                                                                                                                                                                                                                                                                                   |                                                                                                                                                                                                                                                                                              |
| Funding                                                                     | European Commission                                                                                                                                                                                                                                                                                                                                                                    |                                                                                                                                                                                                                                                                                                                                                                                                                                                                                                                   |                                                                                                                                                                                                                                                                                              |
| Conflict of interest                                                        | -                                                                                                                                                                                                                                                                                                                                                                                      |                                                                                                                                                                                                                                                                                                                                                                                                                                                                                                                   |                                                                                                                                                                                                                                                                                              |
| Part of other network(s)                                                    | -                                                                                                                                                                                                                                                                                                                                                                                      |                                                                                                                                                                                                                                                                                                                                                                                                                                                                                                                   |                                                                                                                                                                                                                                                                                              |
| Grouping other network(s)                                                   | Country network with official contact points                                                                                                                                                                                                                                                                                                                                           |                                                                                                                                                                                                                                                                                                                                                                                                                                                                                                                   |                                                                                                                                                                                                                                                                                              |
| <b>MONITORING SUBJECT</b>                                                   |                                                                                                                                                                                                                                                                                                                                                                                        |                                                                                                                                                                                                                                                                                                                                                                                                                                                                                                                   |                                                                                                                                                                                                                                                                                              |
| Description                                                                 | Provide food and feed control authorities with an effective tool to exchange information about measures taken responding to serious risks detected in relation to food or feed.                                                                                                                                                                                                        |                                                                                                                                                                                                                                                                                                                                                                                                                                                                                                                   |                                                                                                                                                                                                                                                                                              |
| Protection goal(s) and/or influencing factor(s)                             | <input checked="" type="checkbox"/> Protection goal<br><input type="checkbox"/> Biodiversity<br><input checked="" type="checkbox"/> Human Health<br><input checked="" type="checkbox"/> Animal Health<br><input type="checkbox"/> Plant Health<br><input type="checkbox"/> Soil function<br><input type="checkbox"/> Water quality<br><input type="checkbox"/> Sustainable Agriculture | <input type="checkbox"/> Influencing factor<br><input type="checkbox"/> Agronomic practice<br><input type="checkbox"/> Plant protection<br><input type="checkbox"/> GMO cultivation<br><input type="checkbox"/> Environmental conditions                                                                                                                                                                                                                                                                          |                                                                                                                                                                                                                                                                                              |
| Duplication of Farmer's questionnaire                                       | <input checked="" type="checkbox"/> No duplication<br><input type="checkbox"/> Partly duplication<br><input type="checkbox"/> Complete duplication                                                                                                                                                                                                                                     |                                                                                                                                                                                                                                                                                                                                                                                                                                                                                                                   |                                                                                                                                                                                                                                                                                              |
| <b>SPECIFICITY</b>                                                          |                                                                                                                                                                                                                                                                                                                                                                                        |                                                                                                                                                                                                                                                                                                                                                                                                                                                                                                                   |                                                                                                                                                                                                                                                                                              |
| Geography                                                                   | <input checked="" type="checkbox"/> EU -wide<br><input type="checkbox"/> Zone A – North<br><input type="checkbox"/> Zone B – Centre:<br><input type="checkbox"/> Zone C – South                                                                                                                                                                                                        |                                                                                                                                                                                                                                                                                                                                                                                                                                                                                                                   |                                                                                                                                                                                                                                                                                              |
|                                                                             | <input type="checkbox"/> Denmark,<br><input type="checkbox"/> Estonia,<br><input type="checkbox"/> Latvia,<br><input type="checkbox"/> Lithuania,<br><input type="checkbox"/> Finland,<br><input type="checkbox"/> Sweden                                                                                                                                                              | <input type="checkbox"/> Belgium,<br><input type="checkbox"/> Czech Republic<br><input type="checkbox"/> Germany,<br><input type="checkbox"/> Ireland,<br><input type="checkbox"/> Luxembourg,<br><input type="checkbox"/> Hungary,<br><input type="checkbox"/> Netherlands,<br><input type="checkbox"/> Austria,<br><input type="checkbox"/> Poland,<br><input type="checkbox"/> Romania,<br><input type="checkbox"/> Slovenia,<br><input type="checkbox"/> Slovakia,<br><input type="checkbox"/> United Kingdom | <input type="checkbox"/> Bulgaria,<br><input type="checkbox"/> Greece,<br><input type="checkbox"/> Spain,<br><input type="checkbox"/> France,<br><input type="checkbox"/> Italy,<br><input type="checkbox"/> Cyprus,<br><input type="checkbox"/> Malta,<br><input type="checkbox"/> Portugal |
|                                                                             | <input type="checkbox"/> Regional (specify)<br><input type="checkbox"/> Local (specify)                                                                                                                                                                                                                                                                                                |                                                                                                                                                                                                                                                                                                                                                                                                                                                                                                                   |                                                                                                                                                                                                                                                                                              |
| Factors                                                                     | <input checked="" type="checkbox"/> Multiple species/items (specify) any health effect<br><input type="checkbox"/> Single species/item (specify)                                                                                                                                                                                                                                       |                                                                                                                                                                                                                                                                                                                                                                                                                                                                                                                   |                                                                                                                                                                                                                                                                                              |
| Crop                                                                        | <input checked="" type="checkbox"/> No specific crop(s)<br><input type="checkbox"/> Several crops (e.g. all cereals)<br><input type="checkbox"/> Single crop                                                                                                                                                                                                                           |                                                                                                                                                                                                                                                                                                                                                                                                                                                                                                                   |                                                                                                                                                                                                                                                                                              |
| Trait /treatment                                                            | <input checked="" type="checkbox"/> No specific traits/treatments<br><input type="checkbox"/> Several traits/treatments<br><input type="checkbox"/> Single trait/treatment                                                                                                                                                                                                             |                                                                                                                                                                                                                                                                                                                                                                                                                                                                                                                   |                                                                                                                                                                                                                                                                                              |
| GMO                                                                         | <input checked="" type="checkbox"/> No GMO bias<br><input type="checkbox"/> GMO specific                                                                                                                                                                                                                                                                                               |                                                                                                                                                                                                                                                                                                                                                                                                                                                                                                                   |                                                                                                                                                                                                                                                                                              |
| <b>METHODOLOGY</b>                                                          |                                                                                                                                                                                                                                                                                                                                                                                        |                                                                                                                                                                                                                                                                                                                                                                                                                                                                                                                   |                                                                                                                                                                                                                                                                                              |
| Observations                                                                | <input type="checkbox"/> Reported, verifiable methodology<br><input type="checkbox"/> Reported, unverifiable methodology<br><input type="checkbox"/> Unknown, unverifiable methodology                                                                                                                                                                                                 |                                                                                                                                                                                                                                                                                                                                                                                                                                                                                                                   |                                                                                                                                                                                                                                                                                              |
| Frequency                                                                   | <input checked="" type="checkbox"/> > 1 time/year                                                                                                                                                                                                                                                                                                                                      |                                                                                                                                                                                                                                                                                                                                                                                                                                                                                                                   |                                                                                                                                                                                                                                                                                              |

|                                                                                                                       |                                                                                                                                                                                                                                                                        |
|-----------------------------------------------------------------------------------------------------------------------|------------------------------------------------------------------------------------------------------------------------------------------------------------------------------------------------------------------------------------------------------------------------|
|                                                                                                                       | <input type="checkbox"/> 1 time/year<br><input type="checkbox"/> < 1 time/year                                                                                                                                                                                         |
| Future                                                                                                                | <input checked="" type="checkbox"/> For ≥ 5 years<br><input type="checkbox"/> between 1 and 5 years<br><input type="checkbox"/> no prospect                                                                                                                            |
| Quality of performers                                                                                                 | <input checked="" type="checkbox"/> Trained, professionals<br><input type="checkbox"/> Trained, non-professionals – training by documentation, volunteers<br><input type="checkbox"/> Uncertain or not -specified                                                      |
| Quality of data                                                                                                       | <input checked="" type="checkbox"/> Standard recording of raw data<br><input type="checkbox"/> Free recording of raw data<br><input type="checkbox"/> Anecdotic                                                                                                        |
| Analysis                                                                                                              | <input type="checkbox"/> Reported, verifiable methodology<br><input type="checkbox"/> Reported, unverifiable methodology<br><input type="checkbox"/> Unknown, unverifiable methodology                                                                                 |
| Quality of analysis                                                                                                   | <input checked="" type="checkbox"/> Scientifically based<br><input type="checkbox"/> Indicative only<br><input type="checkbox"/> Unknown                                                                                                                               |
| <b>REPORTING</b>                                                                                                      |                                                                                                                                                                                                                                                                        |
| Language                                                                                                              | <input type="checkbox"/> Specify reporting language(s): English (multiple languages)                                                                                                                                                                                   |
| Availability                                                                                                          | <input type="checkbox"/> Scientific publication<br><input checked="" type="checkbox"/> Official report available on the internet or in other public forum<br><input type="checkbox"/> Official report available from network<br><input type="checkbox"/> Not available |
| Frequency                                                                                                             | <input type="checkbox"/> ≥ 1 time/year – Yearly reports, market notifications and border rejections<br><input type="checkbox"/> < 1 time/year – Books                                                                                                                  |
| Historical reference                                                                                                  | <input checked="" type="checkbox"/> over ≥ 5 years<br><input type="checkbox"/> between 1 and 5 years<br><input type="checkbox"/> no historical analysis                                                                                                                |
| <b>COMMENT(S)</b>                                                                                                     |                                                                                                                                                                                                                                                                        |
| An alert system based on national indications to take fast action, includes information on unauthorized GMO presence. |                                                                                                                                                                                                                                                                        |

## GSEN-09-0137.00.1 EU – Coloss

| EuropaBio's coordinated approach to General Surveillance: Existing Networks |                                                                                                                                                                                                                                                                                                                                                                                    |                                                                                                                                                                                                                                                                                                                                                                                                                                                                                                                   |                                                                                                                                                                                                                                                                                              |
|-----------------------------------------------------------------------------|------------------------------------------------------------------------------------------------------------------------------------------------------------------------------------------------------------------------------------------------------------------------------------------------------------------------------------------------------------------------------------|-------------------------------------------------------------------------------------------------------------------------------------------------------------------------------------------------------------------------------------------------------------------------------------------------------------------------------------------------------------------------------------------------------------------------------------------------------------------------------------------------------------------|----------------------------------------------------------------------------------------------------------------------------------------------------------------------------------------------------------------------------------------------------------------------------------------------|
| <b>ORGANISATION</b>                                                         |                                                                                                                                                                                                                                                                                                                                                                                    |                                                                                                                                                                                                                                                                                                                                                                                                                                                                                                                   |                                                                                                                                                                                                                                                                                              |
| EuropaBio reference                                                         | GS-EN-09-0137                                                                                                                                                                                                                                                                                                                                                                      |                                                                                                                                                                                                                                                                                                                                                                                                                                                                                                                   |                                                                                                                                                                                                                                                                                              |
| Official name of the Network                                                | <b>COLOSS (Prevention of honeybee Colony Losses)</b><br>Cost Action FA 0803                                                                                                                                                                                                                                                                                                        |                                                                                                                                                                                                                                                                                                                                                                                                                                                                                                                   |                                                                                                                                                                                                                                                                                              |
| Other names                                                                 | Prevention of COLony LOSSes network                                                                                                                                                                                                                                                                                                                                                |                                                                                                                                                                                                                                                                                                                                                                                                                                                                                                                   |                                                                                                                                                                                                                                                                                              |
| Type of organisation                                                        | Professional<br>Start: 21/11/2008 – End: 20/11/2012                                                                                                                                                                                                                                                                                                                                |                                                                                                                                                                                                                                                                                                                                                                                                                                                                                                                   |                                                                                                                                                                                                                                                                                              |
| Contact person                                                              |                                                                                                                                                                                                                                                                                                                                                                                    |                                                                                                                                                                                                                                                                                                                                                                                                                                                                                                                   |                                                                                                                                                                                                                                                                                              |
| Coordinates                                                                 | <a href="mailto:coloss.network[at]gmail.com">coloss.network[at]gmail.com</a>                                                                                                                                                                                                                                                                                                       |                                                                                                                                                                                                                                                                                                                                                                                                                                                                                                                   |                                                                                                                                                                                                                                                                                              |
| Website                                                                     | <a href="http://coloss.org/">http://coloss.org/</a>                                                                                                                                                                                                                                                                                                                                |                                                                                                                                                                                                                                                                                                                                                                                                                                                                                                                   |                                                                                                                                                                                                                                                                                              |
| Funding                                                                     | COST Grant System<br>EU RTD framework programme                                                                                                                                                                                                                                                                                                                                    |                                                                                                                                                                                                                                                                                                                                                                                                                                                                                                                   |                                                                                                                                                                                                                                                                                              |
| Conflict of interest                                                        |                                                                                                                                                                                                                                                                                                                                                                                    |                                                                                                                                                                                                                                                                                                                                                                                                                                                                                                                   |                                                                                                                                                                                                                                                                                              |
| Part of other network(s)                                                    |                                                                                                                                                                                                                                                                                                                                                                                    |                                                                                                                                                                                                                                                                                                                                                                                                                                                                                                                   |                                                                                                                                                                                                                                                                                              |
| Grouping other network(s)                                                   | 152 members in 37 countries (Europe, Turkey, Israel, Jordan, Egypt, China, South Korea, Canada and USA)                                                                                                                                                                                                                                                                            |                                                                                                                                                                                                                                                                                                                                                                                                                                                                                                                   |                                                                                                                                                                                                                                                                                              |
| <b>MONITORING SUBJECT</b>                                                   |                                                                                                                                                                                                                                                                                                                                                                                    |                                                                                                                                                                                                                                                                                                                                                                                                                                                                                                                   |                                                                                                                                                                                                                                                                                              |
| Description                                                                 | Monitoring an diagnosing bee colonies to identify the factors at the individual honeybee and colony levels causing severe colony losses and investigate synergistic effects between them.                                                                                                                                                                                          |                                                                                                                                                                                                                                                                                                                                                                                                                                                                                                                   |                                                                                                                                                                                                                                                                                              |
| Protection goal(s) and/or influencing factor(s)                             | <input checked="" type="checkbox"/> Protection goal<br><input type="checkbox"/> Biodiversity:<br><input type="checkbox"/> Human Health<br><input checked="" type="checkbox"/> Animal Health: bees<br><input type="checkbox"/> Plant Health<br><input type="checkbox"/> Soil function<br><input type="checkbox"/> Water quality<br><input type="checkbox"/> Sustainable Agriculture | <input type="checkbox"/> Influencing factor<br><input type="checkbox"/> Agronomic practice<br><input type="checkbox"/> Plant protection<br><input type="checkbox"/> GMO cultivation<br><input type="checkbox"/> Environmental conditions                                                                                                                                                                                                                                                                          |                                                                                                                                                                                                                                                                                              |
| Duplication of Farmer's questionnaire                                       | <input checked="" type="checkbox"/> No duplication<br><input type="checkbox"/> Partly duplication<br><input type="checkbox"/> Complete duplication                                                                                                                                                                                                                                 |                                                                                                                                                                                                                                                                                                                                                                                                                                                                                                                   |                                                                                                                                                                                                                                                                                              |
| <b>SPECIFICITY</b>                                                          |                                                                                                                                                                                                                                                                                                                                                                                    |                                                                                                                                                                                                                                                                                                                                                                                                                                                                                                                   |                                                                                                                                                                                                                                                                                              |
| Geography                                                                   | <input checked="" type="checkbox"/> EU –wide<br><input type="checkbox"/> Zone A – North<br><input type="checkbox"/> Zone B – Centre:<br><input type="checkbox"/> Zone C – South                                                                                                                                                                                                    |                                                                                                                                                                                                                                                                                                                                                                                                                                                                                                                   |                                                                                                                                                                                                                                                                                              |
|                                                                             | <input type="checkbox"/> Denmark,<br><input type="checkbox"/> Estonia,<br><input type="checkbox"/> Latvia,<br><input type="checkbox"/> Lithuania,<br><input type="checkbox"/> Finland,<br><input type="checkbox"/> Sweden                                                                                                                                                          | <input type="checkbox"/> Belgium,<br><input type="checkbox"/> Czech Republic<br><input type="checkbox"/> Germany,<br><input type="checkbox"/> Ireland,<br><input type="checkbox"/> Luxembourg,<br><input type="checkbox"/> Hungary,<br><input type="checkbox"/> Netherlands,<br><input type="checkbox"/> Austria,<br><input type="checkbox"/> Poland,<br><input type="checkbox"/> Romania,<br><input type="checkbox"/> Slovenia,<br><input type="checkbox"/> Slovakia,<br><input type="checkbox"/> United Kingdom | <input type="checkbox"/> Bulgaria,<br><input type="checkbox"/> Greece,<br><input type="checkbox"/> Spain,<br><input type="checkbox"/> France,<br><input type="checkbox"/> Italy,<br><input type="checkbox"/> Cyprus,<br><input type="checkbox"/> Malta,<br><input type="checkbox"/> Portugal |
|                                                                             | <input type="checkbox"/> Regional (specify)<br><input type="checkbox"/> Local (specify)                                                                                                                                                                                                                                                                                            |                                                                                                                                                                                                                                                                                                                                                                                                                                                                                                                   |                                                                                                                                                                                                                                                                                              |
| Factors                                                                     | <input type="checkbox"/> Multiple species/items (specify):<br><input checked="" type="checkbox"/> Single species/item (specify): honeybee                                                                                                                                                                                                                                          |                                                                                                                                                                                                                                                                                                                                                                                                                                                                                                                   |                                                                                                                                                                                                                                                                                              |
| Crop                                                                        | <input type="checkbox"/> No specific crop(s)<br><input type="checkbox"/> Several crops (e.g. all cereals)<br><input type="checkbox"/> Single crop                                                                                                                                                                                                                                  |                                                                                                                                                                                                                                                                                                                                                                                                                                                                                                                   |                                                                                                                                                                                                                                                                                              |
| Trait /treatment                                                            | <input type="checkbox"/> No specific traits/treatments<br><input type="checkbox"/> Several traits/treatments<br><input type="checkbox"/> Single trait/treatment                                                                                                                                                                                                                    |                                                                                                                                                                                                                                                                                                                                                                                                                                                                                                                   |                                                                                                                                                                                                                                                                                              |
| GMO                                                                         | <input checked="" type="checkbox"/> No GMO bias<br><input type="checkbox"/> GMO specific                                                                                                                                                                                                                                                                                           |                                                                                                                                                                                                                                                                                                                                                                                                                                                                                                                   |                                                                                                                                                                                                                                                                                              |
| <b>METHODOLOGY</b>                                                          |                                                                                                                                                                                                                                                                                                                                                                                    |                                                                                                                                                                                                                                                                                                                                                                                                                                                                                                                   |                                                                                                                                                                                                                                                                                              |



|                                                                                                                                           |                                                                                                                                                                                                                                                                        |
|-------------------------------------------------------------------------------------------------------------------------------------------|------------------------------------------------------------------------------------------------------------------------------------------------------------------------------------------------------------------------------------------------------------------------|
| Observations                                                                                                                              | <input checked="" type="checkbox"/> Reported, verifiable methodology<br><input type="checkbox"/> Reported, unverifiable methodology<br><input type="checkbox"/> Unknown, unverifiable methodology                                                                      |
| Frequency                                                                                                                                 | <input type="checkbox"/> > 1 time/year:<br><input checked="" type="checkbox"/> 1 time/year:<br><input type="checkbox"/> < 1 time/year                                                                                                                                  |
| Future                                                                                                                                    | <input type="checkbox"/> For $\geq 5$ years<br><input checked="" type="checkbox"/> between 1 and 5 years<br><input type="checkbox"/> no prospect                                                                                                                       |
| Quality of performers                                                                                                                     | <input checked="" type="checkbox"/> Trained, professionals<br><input checked="" type="checkbox"/> Trained, non-professionals – volunteers, beekeepers<br><input type="checkbox"/> Uncertain or not –specified                                                          |
| Quality of data                                                                                                                           | <input checked="" type="checkbox"/> Standard recording of raw data<br><input type="checkbox"/> Free recording of raw data<br><input type="checkbox"/> Anecdotic                                                                                                        |
| Analysis                                                                                                                                  | <input type="checkbox"/> Reported, verifiable methodology<br><input type="checkbox"/> Reported, unverifiable methodology<br><input checked="" type="checkbox"/> Unknown, unverifiable methodology                                                                      |
| Quality of analysis                                                                                                                       | <input checked="" type="checkbox"/> Scientifically based<br><input type="checkbox"/> Indicative only<br><input type="checkbox"/> Unknown                                                                                                                               |
| <b>REPORTING</b>                                                                                                                          |                                                                                                                                                                                                                                                                        |
| Language                                                                                                                                  | <input checked="" type="checkbox"/> Specify reporting language(s): English                                                                                                                                                                                             |
| Availability                                                                                                                              | <input checked="" type="checkbox"/> Scientific publication<br><input type="checkbox"/> Official report available on the internet or in other public forum<br><input type="checkbox"/> Official report available from network<br><input type="checkbox"/> Not available |
| Frequency                                                                                                                                 | <input checked="" type="checkbox"/> $\geq 1$ time/year –<br><input type="checkbox"/> < 1 time/year –                                                                                                                                                                   |
| Historical reference                                                                                                                      | <input type="checkbox"/> over $\geq 5$ years:<br><input type="checkbox"/> between 1 and 5 years:<br><input checked="" type="checkbox"/> no historical analysis:                                                                                                        |
| <b>COMMENT(S)</b>                                                                                                                         |                                                                                                                                                                                                                                                                        |
| Monitoring to identify cause(s) of Colony Collapse Disorder (CCD) via standard questionnaire to both professional and amateur beekeepers. |                                                                                                                                                                                                                                                                        |

## GSEN-09-0152.00.1 EU – BirdLife International

| EuropaBio's coordinated approach to General Surveillance: Existing Networks |                                                                                                                                                                                                                                                                                                                             |                                                                                                                                                                                                                                                                                                                                                                                                                                                                                                                   |                                                                                                                                                                                                                                                                                              |
|-----------------------------------------------------------------------------|-----------------------------------------------------------------------------------------------------------------------------------------------------------------------------------------------------------------------------------------------------------------------------------------------------------------------------|-------------------------------------------------------------------------------------------------------------------------------------------------------------------------------------------------------------------------------------------------------------------------------------------------------------------------------------------------------------------------------------------------------------------------------------------------------------------------------------------------------------------|----------------------------------------------------------------------------------------------------------------------------------------------------------------------------------------------------------------------------------------------------------------------------------------------|
| <b>ORGANISATION</b>                                                         |                                                                                                                                                                                                                                                                                                                             |                                                                                                                                                                                                                                                                                                                                                                                                                                                                                                                   |                                                                                                                                                                                                                                                                                              |
| EuropaBio reference                                                         | GS-EN-09-0152                                                                                                                                                                                                                                                                                                               |                                                                                                                                                                                                                                                                                                                                                                                                                                                                                                                   |                                                                                                                                                                                                                                                                                              |
| Official name of the Network                                                | BirdLife International, European division                                                                                                                                                                                                                                                                                   |                                                                                                                                                                                                                                                                                                                                                                                                                                                                                                                   |                                                                                                                                                                                                                                                                                              |
| Other names                                                                 |                                                                                                                                                                                                                                                                                                                             |                                                                                                                                                                                                                                                                                                                                                                                                                                                                                                                   |                                                                                                                                                                                                                                                                                              |
| Type of organisation                                                        | Nature conservation<br>Founded (unknown)                                                                                                                                                                                                                                                                                    |                                                                                                                                                                                                                                                                                                                                                                                                                                                                                                                   |                                                                                                                                                                                                                                                                                              |
| Coordinates                                                                 | Avenue de la Toison d'Or 67<br>(2 <sup>nd</sup> floor)<br>B-1060 Brussels<br><br>Fax: +32 2230 38 02<br>Email: <a href="mailto:europa[at]birdlife.org">europa[at]birdlife.org</a>                                                                                                                                           |                                                                                                                                                                                                                                                                                                                                                                                                                                                                                                                   |                                                                                                                                                                                                                                                                                              |
| Website                                                                     | <a href="http://www.birdlife.org/regional/europe/index.html">http://www.birdlife.org/regional/europe/index.html</a>                                                                                                                                                                                                         |                                                                                                                                                                                                                                                                                                                                                                                                                                                                                                                   |                                                                                                                                                                                                                                                                                              |
| Funding                                                                     | Partners, members (1,9 million), donations, legacies, funding (partly by the EU)                                                                                                                                                                                                                                            |                                                                                                                                                                                                                                                                                                                                                                                                                                                                                                                   |                                                                                                                                                                                                                                                                                              |
| Conflict of interest                                                        | -                                                                                                                                                                                                                                                                                                                           |                                                                                                                                                                                                                                                                                                                                                                                                                                                                                                                   |                                                                                                                                                                                                                                                                                              |
| Part of other network(s)                                                    | BirdLife International                                                                                                                                                                                                                                                                                                      |                                                                                                                                                                                                                                                                                                                                                                                                                                                                                                                   |                                                                                                                                                                                                                                                                                              |
| Grouping other network(s)                                                   | BirdLife partners (national associations) and affiliates (total 42)                                                                                                                                                                                                                                                         |                                                                                                                                                                                                                                                                                                                                                                                                                                                                                                                   |                                                                                                                                                                                                                                                                                              |
| <b>MONITORING SUBJECT</b>                                                   |                                                                                                                                                                                                                                                                                                                             |                                                                                                                                                                                                                                                                                                                                                                                                                                                                                                                   |                                                                                                                                                                                                                                                                                              |
| Description                                                                 | Aims to conserve birds, their habitats and global biodiversity.                                                                                                                                                                                                                                                             |                                                                                                                                                                                                                                                                                                                                                                                                                                                                                                                   |                                                                                                                                                                                                                                                                                              |
| Protection goal(s) and/or influencing factor(s)                             | <input checked="" type="checkbox"/> Protection goal                                                                                                                                                                                                                                                                         | <input type="checkbox"/> Influencing factor                                                                                                                                                                                                                                                                                                                                                                                                                                                                       |                                                                                                                                                                                                                                                                                              |
|                                                                             | <input checked="" type="checkbox"/> Biodiversity: birds<br><input type="checkbox"/> Human Health<br><input type="checkbox"/> Animal Health<br><input type="checkbox"/> Plant Health<br><input type="checkbox"/> Soil function<br><input type="checkbox"/> Water quality<br><input type="checkbox"/> Sustainable Agriculture | <input type="checkbox"/> Agronomic practice<br><input type="checkbox"/> Plant protection<br><input type="checkbox"/> GMO cultivation<br><input type="checkbox"/> Environmental conditions                                                                                                                                                                                                                                                                                                                         |                                                                                                                                                                                                                                                                                              |
| Duplication of Farmer's questionnaire                                       | <input checked="" type="checkbox"/> No duplication<br><input type="checkbox"/> Partly duplication<br><input type="checkbox"/> Complete duplication                                                                                                                                                                          |                                                                                                                                                                                                                                                                                                                                                                                                                                                                                                                   |                                                                                                                                                                                                                                                                                              |
| <b>SPECIFICITY</b>                                                          |                                                                                                                                                                                                                                                                                                                             |                                                                                                                                                                                                                                                                                                                                                                                                                                                                                                                   |                                                                                                                                                                                                                                                                                              |
| Geography                                                                   | <input checked="" type="checkbox"/> EU -wide                                                                                                                                                                                                                                                                                |                                                                                                                                                                                                                                                                                                                                                                                                                                                                                                                   |                                                                                                                                                                                                                                                                                              |
|                                                                             | <input type="checkbox"/> Zone A – North                                                                                                                                                                                                                                                                                     | <input type="checkbox"/> Zone B – Centre:                                                                                                                                                                                                                                                                                                                                                                                                                                                                         | <input type="checkbox"/> Zone C – South                                                                                                                                                                                                                                                      |
|                                                                             | <input type="checkbox"/> Denmark,<br><input type="checkbox"/> Estonia,<br><input type="checkbox"/> Latvia,<br><input type="checkbox"/> Lithuania,<br><input type="checkbox"/> Finland,<br><input type="checkbox"/> Sweden                                                                                                   | <input type="checkbox"/> Belgium,<br><input type="checkbox"/> Czech Republic<br><input type="checkbox"/> Germany,<br><input type="checkbox"/> Ireland,<br><input type="checkbox"/> Luxembourg,<br><input type="checkbox"/> Hungary,<br><input type="checkbox"/> Netherlands,<br><input type="checkbox"/> Austria,<br><input type="checkbox"/> Poland,<br><input type="checkbox"/> Romania,<br><input type="checkbox"/> Slovenia,<br><input type="checkbox"/> Slovakia,<br><input type="checkbox"/> United Kingdom | <input type="checkbox"/> Bulgaria,<br><input type="checkbox"/> Greece,<br><input type="checkbox"/> Spain,<br><input type="checkbox"/> France,<br><input type="checkbox"/> Italy,<br><input type="checkbox"/> Cyprus,<br><input type="checkbox"/> Malta,<br><input type="checkbox"/> Portugal |
|                                                                             | <input type="checkbox"/> Regional (specify)<br><input type="checkbox"/> Local (specify)                                                                                                                                                                                                                                     |                                                                                                                                                                                                                                                                                                                                                                                                                                                                                                                   |                                                                                                                                                                                                                                                                                              |
| Factors                                                                     | <input checked="" type="checkbox"/> Multiple species/items (specify): birds<br><input type="checkbox"/> Single species/item (specify)                                                                                                                                                                                       |                                                                                                                                                                                                                                                                                                                                                                                                                                                                                                                   |                                                                                                                                                                                                                                                                                              |
| Crop                                                                        | <input checked="" type="checkbox"/> No specific crop(s)<br><input type="checkbox"/> Several crops (e.g. all cereals)<br><input type="checkbox"/> Single crop                                                                                                                                                                |                                                                                                                                                                                                                                                                                                                                                                                                                                                                                                                   |                                                                                                                                                                                                                                                                                              |
| Trait /treatment                                                            | <input checked="" type="checkbox"/> No specific traits/treatments<br><input type="checkbox"/> Several traits/treatments<br><input type="checkbox"/> Single trait/treatment                                                                                                                                                  |                                                                                                                                                                                                                                                                                                                                                                                                                                                                                                                   |                                                                                                                                                                                                                                                                                              |
| GMO                                                                         | <input checked="" type="checkbox"/> No GMO bias<br><input type="checkbox"/> GMO specific                                                                                                                                                                                                                                    |                                                                                                                                                                                                                                                                                                                                                                                                                                                                                                                   |                                                                                                                                                                                                                                                                                              |
| <b>METHODOLOGY</b>                                                          |                                                                                                                                                                                                                                                                                                                             |                                                                                                                                                                                                                                                                                                                                                                                                                                                                                                                   |                                                                                                                                                                                                                                                                                              |

|                                                                                                                                                                                                                                                                                   |                                                                                                                                                                                                                                                                        |
|-----------------------------------------------------------------------------------------------------------------------------------------------------------------------------------------------------------------------------------------------------------------------------------|------------------------------------------------------------------------------------------------------------------------------------------------------------------------------------------------------------------------------------------------------------------------|
| Observations                                                                                                                                                                                                                                                                      | <input type="checkbox"/> Reported, verifiable methodology<br><input type="checkbox"/> Reported, unverifiable methodology<br><input type="checkbox"/> Unknown, unverifiable methodology                                                                                 |
| Frequency                                                                                                                                                                                                                                                                         | <input type="checkbox"/> > 1 time/year<br><input type="checkbox"/> 1 time/year<br><input type="checkbox"/> < 1 time/year                                                                                                                                               |
| Future                                                                                                                                                                                                                                                                            | <input type="checkbox"/> For ≥ 5 years<br><input type="checkbox"/> between 1 and 5 years<br><input type="checkbox"/> no prospect                                                                                                                                       |
| Quality of performers                                                                                                                                                                                                                                                             | <input type="checkbox"/> Trained, professionals<br><input type="checkbox"/> Trained, non-professionals – training by documentation, volunteers<br><input type="checkbox"/> Uncertain or not -specified                                                                 |
| Quality of data                                                                                                                                                                                                                                                                   | <input type="checkbox"/> Standard recording of raw data<br><input type="checkbox"/> Free recording of raw data<br><input type="checkbox"/> Anecdotic                                                                                                                   |
| Analysis                                                                                                                                                                                                                                                                          | <input type="checkbox"/> Reported, verifiable methodology<br><input type="checkbox"/> Reported, unverifiable methodology<br><input type="checkbox"/> Unknown, unverifiable methodology                                                                                 |
| Quality of analysis                                                                                                                                                                                                                                                               | <input type="checkbox"/> Scientifically based<br><input type="checkbox"/> Indicative only<br><input type="checkbox"/> Unknown                                                                                                                                          |
| <b>REPORTING</b>                                                                                                                                                                                                                                                                  |                                                                                                                                                                                                                                                                        |
| Language                                                                                                                                                                                                                                                                          | Reporting language(s): English                                                                                                                                                                                                                                         |
| Availability                                                                                                                                                                                                                                                                      | <input type="checkbox"/> Scientific publication<br><input checked="" type="checkbox"/> Official report available on the internet or in other public forum<br><input type="checkbox"/> Official report available from network<br><input type="checkbox"/> Not available |
| Frequency                                                                                                                                                                                                                                                                         | <input checked="" type="checkbox"/> ≥ 1 time/year – population trends: annually<br><input checked="" type="checkbox"/> < 1 time/year – status assessment: every 10 years                                                                                               |
| Historical reference                                                                                                                                                                                                                                                              | <input checked="" type="checkbox"/> over ≥ 5 years<br><input type="checkbox"/> between 1 and 5 years<br><input type="checkbox"/> no historical analysis                                                                                                                |
| <b>COMMENT(S)</b>                                                                                                                                                                                                                                                                 |                                                                                                                                                                                                                                                                        |
| Pan-European bird network with information on trends in population sizes. Combining established monitoring networks throughout Europe using common bird species, 'Important Bird Areas' (IBA) and the most threatened birds as representative indicators and as protection goals. |                                                                                                                                                                                                                                                                        |

## GSEN-09-0153.00.1 EU – Butterfly Conservation Europe

| EuropaBio's coordinated approach to General Surveillance: Existing Networks |                                                                                                                                                                                                                                                                                                                                                                                                        |                                                                                                                                                                                                                                                                                                                                                                                                                                                                                                                   |                                                                                                                                                                                                                                                                                              |
|-----------------------------------------------------------------------------|--------------------------------------------------------------------------------------------------------------------------------------------------------------------------------------------------------------------------------------------------------------------------------------------------------------------------------------------------------------------------------------------------------|-------------------------------------------------------------------------------------------------------------------------------------------------------------------------------------------------------------------------------------------------------------------------------------------------------------------------------------------------------------------------------------------------------------------------------------------------------------------------------------------------------------------|----------------------------------------------------------------------------------------------------------------------------------------------------------------------------------------------------------------------------------------------------------------------------------------------|
| <b>ORGANISATION</b>                                                         |                                                                                                                                                                                                                                                                                                                                                                                                        |                                                                                                                                                                                                                                                                                                                                                                                                                                                                                                                   |                                                                                                                                                                                                                                                                                              |
| EuropaBio reference                                                         | GS-EN-09-0153                                                                                                                                                                                                                                                                                                                                                                                          |                                                                                                                                                                                                                                                                                                                                                                                                                                                                                                                   |                                                                                                                                                                                                                                                                                              |
| Official name of the Network                                                | <b>Butterfly Conservation Europe</b>                                                                                                                                                                                                                                                                                                                                                                   |                                                                                                                                                                                                                                                                                                                                                                                                                                                                                                                   |                                                                                                                                                                                                                                                                                              |
| Other names                                                                 | BC Europe                                                                                                                                                                                                                                                                                                                                                                                              |                                                                                                                                                                                                                                                                                                                                                                                                                                                                                                                   |                                                                                                                                                                                                                                                                                              |
| Type of organisation                                                        | Nature conservation<br>Founded 2004                                                                                                                                                                                                                                                                                                                                                                    |                                                                                                                                                                                                                                                                                                                                                                                                                                                                                                                   |                                                                                                                                                                                                                                                                                              |
| Coordinates                                                                 | Wageningen<br>The Netherlands<br><br>Email: <a href="mailto:info[at]bc-europe.eu">info[at]bc-europe.eu</a>                                                                                                                                                                                                                                                                                             |                                                                                                                                                                                                                                                                                                                                                                                                                                                                                                                   |                                                                                                                                                                                                                                                                                              |
| Website                                                                     | <a href="http://www.bc-europe.org/">http://www.bc-europe.org/</a>                                                                                                                                                                                                                                                                                                                                      |                                                                                                                                                                                                                                                                                                                                                                                                                                                                                                                   |                                                                                                                                                                                                                                                                                              |
| Funding                                                                     | Partners, members, donations, legacies, funding (partly by the EU)                                                                                                                                                                                                                                                                                                                                     |                                                                                                                                                                                                                                                                                                                                                                                                                                                                                                                   |                                                                                                                                                                                                                                                                                              |
| Conflict of interest                                                        | -                                                                                                                                                                                                                                                                                                                                                                                                      |                                                                                                                                                                                                                                                                                                                                                                                                                                                                                                                   |                                                                                                                                                                                                                                                                                              |
| Part of other network(s)                                                    |                                                                                                                                                                                                                                                                                                                                                                                                        |                                                                                                                                                                                                                                                                                                                                                                                                                                                                                                                   |                                                                                                                                                                                                                                                                                              |
| Grouping other network(s)                                                   | BC partners (national associations) and affiliates (total 36)                                                                                                                                                                                                                                                                                                                                          |                                                                                                                                                                                                                                                                                                                                                                                                                                                                                                                   |                                                                                                                                                                                                                                                                                              |
| <b>MONITORING SUBJECT</b>                                                   |                                                                                                                                                                                                                                                                                                                                                                                                        |                                                                                                                                                                                                                                                                                                                                                                                                                                                                                                                   |                                                                                                                                                                                                                                                                                              |
| Description                                                                 | Act as an umbrella organisation coordinating and stimulating recording and monitoring programmes<br>Aims to conserve butterflies, moths and their habitats across Europe.                                                                                                                                                                                                                              |                                                                                                                                                                                                                                                                                                                                                                                                                                                                                                                   |                                                                                                                                                                                                                                                                                              |
| Protection goal(s) and/or influencing factor(s)                             | <input checked="" type="checkbox"/> Protection goal<br><br><input checked="" type="checkbox"/> Biodiversity: butterflies and moths<br><input type="checkbox"/> Human Health<br><input type="checkbox"/> Animal Health<br><input type="checkbox"/> Plant Health<br><input type="checkbox"/> Soil function<br><input type="checkbox"/> Water quality<br><input type="checkbox"/> Sustainable Agriculture | <input type="checkbox"/> Influencing factor<br><br><input type="checkbox"/> Agronomic practice<br><input type="checkbox"/> Plant protection<br><input type="checkbox"/> GMO cultivation<br><input type="checkbox"/> Environmental conditions                                                                                                                                                                                                                                                                      |                                                                                                                                                                                                                                                                                              |
| Duplication of Farmer's questionnaire                                       | <input checked="" type="checkbox"/> No duplication<br><input type="checkbox"/> Partly duplication<br><input type="checkbox"/> Complete duplication                                                                                                                                                                                                                                                     |                                                                                                                                                                                                                                                                                                                                                                                                                                                                                                                   |                                                                                                                                                                                                                                                                                              |
| <b>SPECIFICITY</b>                                                          |                                                                                                                                                                                                                                                                                                                                                                                                        |                                                                                                                                                                                                                                                                                                                                                                                                                                                                                                                   |                                                                                                                                                                                                                                                                                              |
| Geography                                                                   | <input checked="" type="checkbox"/> EU -wide<br><br><input type="checkbox"/> Zone A – North<br><input type="checkbox"/> Zone B – Centre:<br><input type="checkbox"/> Zone C – South                                                                                                                                                                                                                    |                                                                                                                                                                                                                                                                                                                                                                                                                                                                                                                   |                                                                                                                                                                                                                                                                                              |
|                                                                             | <input type="checkbox"/> Denmark,<br><input type="checkbox"/> Estonia,<br><input type="checkbox"/> Latvia,<br><input type="checkbox"/> Lithuania,<br><input type="checkbox"/> Finland,<br><input type="checkbox"/> Sweden                                                                                                                                                                              | <input type="checkbox"/> Belgium,<br><input type="checkbox"/> Czech Republic<br><input type="checkbox"/> Germany,<br><input type="checkbox"/> Ireland,<br><input type="checkbox"/> Luxembourg,<br><input type="checkbox"/> Hungary,<br><input type="checkbox"/> Netherlands,<br><input type="checkbox"/> Austria,<br><input type="checkbox"/> Poland,<br><input type="checkbox"/> Romania,<br><input type="checkbox"/> Slovenia,<br><input type="checkbox"/> Slovakia,<br><input type="checkbox"/> United Kingdom | <input type="checkbox"/> Bulgaria,<br><input type="checkbox"/> Greece,<br><input type="checkbox"/> Spain,<br><input type="checkbox"/> France,<br><input type="checkbox"/> Italy,<br><input type="checkbox"/> Cyprus,<br><input type="checkbox"/> Malta,<br><input type="checkbox"/> Portugal |
|                                                                             | <input type="checkbox"/> Regional (specify)<br><input type="checkbox"/> Local (specify)                                                                                                                                                                                                                                                                                                                |                                                                                                                                                                                                                                                                                                                                                                                                                                                                                                                   |                                                                                                                                                                                                                                                                                              |
| Factors                                                                     | <input checked="" type="checkbox"/> Multiple species/items (specify): butterflies and moths<br><input type="checkbox"/> Single species/item (specify)                                                                                                                                                                                                                                                  |                                                                                                                                                                                                                                                                                                                                                                                                                                                                                                                   |                                                                                                                                                                                                                                                                                              |
| Crop                                                                        | <input checked="" type="checkbox"/> No specific crop(s)<br><input type="checkbox"/> Several crops (e.g. all cereals)<br><input type="checkbox"/> Single crop                                                                                                                                                                                                                                           |                                                                                                                                                                                                                                                                                                                                                                                                                                                                                                                   |                                                                                                                                                                                                                                                                                              |
| Trait /treatment                                                            | <input checked="" type="checkbox"/> No specific traits/treatments<br><input type="checkbox"/> Several traits/treatments<br><input type="checkbox"/> Single trait/treatment                                                                                                                                                                                                                             |                                                                                                                                                                                                                                                                                                                                                                                                                                                                                                                   |                                                                                                                                                                                                                                                                                              |
| GMO                                                                         | <input checked="" type="checkbox"/> No GMO bias<br><input type="checkbox"/> GMO specific                                                                                                                                                                                                                                                                                                               |                                                                                                                                                                                                                                                                                                                                                                                                                                                                                                                   |                                                                                                                                                                                                                                                                                              |
| <b>METHODOLOGY</b>                                                          |                                                                                                                                                                                                                                                                                                                                                                                                        |                                                                                                                                                                                                                                                                                                                                                                                                                                                                                                                   |                                                                                                                                                                                                                                                                                              |

|                                                                                                                                                   |                                                                                                                                                                                                                                                                        |
|---------------------------------------------------------------------------------------------------------------------------------------------------|------------------------------------------------------------------------------------------------------------------------------------------------------------------------------------------------------------------------------------------------------------------------|
| Observations                                                                                                                                      | <input type="checkbox"/> Reported, verifiable methodology<br><input type="checkbox"/> Reported, unverifiable methodology<br><input type="checkbox"/> Unknown, unverifiable methodology                                                                                 |
| Frequency                                                                                                                                         | <input type="checkbox"/> > 1 time/year<br><input type="checkbox"/> 1 time/year<br><input type="checkbox"/> < 1 time/year                                                                                                                                               |
| Future                                                                                                                                            | <input type="checkbox"/> For $\geq 5$ years<br><input type="checkbox"/> between 1 and 5 years<br><input type="checkbox"/> no prospect                                                                                                                                  |
| Quality of performers                                                                                                                             | <input type="checkbox"/> Trained, professionals<br><input type="checkbox"/> Trained, non-professionals – training by documentation, volunteers<br><input type="checkbox"/> Uncertain or not -specified                                                                 |
| Quality of data                                                                                                                                   | <input type="checkbox"/> Standard recording of raw data<br><input type="checkbox"/> Free recording of raw data<br><input type="checkbox"/> Anecdotic                                                                                                                   |
| Analysis                                                                                                                                          | <input type="checkbox"/> Reported, verifiable methodology<br><input type="checkbox"/> Reported, unverifiable methodology<br><input type="checkbox"/> Unknown, unverifiable methodology                                                                                 |
| Quality of analysis                                                                                                                               | <input type="checkbox"/> Scientifically based<br><input type="checkbox"/> Indicative only<br><input type="checkbox"/> Unknown                                                                                                                                          |
| <b>REPORTING</b>                                                                                                                                  |                                                                                                                                                                                                                                                                        |
| Language                                                                                                                                          | Reporting language(s): English                                                                                                                                                                                                                                         |
| Availability                                                                                                                                      | <input type="checkbox"/> Scientific publication<br><input checked="" type="checkbox"/> Official report available on the internet or in other public forum<br><input type="checkbox"/> Official report available from network<br><input type="checkbox"/> Not available |
| Frequency                                                                                                                                         | <input type="checkbox"/> $\geq 1$ time/year –<br><input checked="" type="checkbox"/> < 1 time/year –                                                                                                                                                                   |
| Historical reference                                                                                                                              | <input checked="" type="checkbox"/> over $\geq 5$ years<br><input type="checkbox"/> between 1 and 5 years<br><input type="checkbox"/> no historical analysis                                                                                                           |
| <b>COMMENT(S)</b>                                                                                                                                 |                                                                                                                                                                                                                                                                        |
| Combining established monitoring networks throughout Europe using all butterfly species as indicators for habitat status and as protection goals. |                                                                                                                                                                                                                                                                        |

## GSEN-09-0154.00.1 EU – European Crop Protection Association

| EuropaBio's coordinated approach to General Surveillance: Existing Networks |                                                                                                                                                                                                                                                                                                                                                                                                   |                                                                                                                                                                                                                                                                                                                                                                                                                                                                                                                   |                                                                                                                                                                                                                                                                                              |
|-----------------------------------------------------------------------------|---------------------------------------------------------------------------------------------------------------------------------------------------------------------------------------------------------------------------------------------------------------------------------------------------------------------------------------------------------------------------------------------------|-------------------------------------------------------------------------------------------------------------------------------------------------------------------------------------------------------------------------------------------------------------------------------------------------------------------------------------------------------------------------------------------------------------------------------------------------------------------------------------------------------------------|----------------------------------------------------------------------------------------------------------------------------------------------------------------------------------------------------------------------------------------------------------------------------------------------|
| <b>ORGANISATION</b>                                                         |                                                                                                                                                                                                                                                                                                                                                                                                   |                                                                                                                                                                                                                                                                                                                                                                                                                                                                                                                   |                                                                                                                                                                                                                                                                                              |
| EuropaBio reference                                                         | GS-EN-09-0154                                                                                                                                                                                                                                                                                                                                                                                     |                                                                                                                                                                                                                                                                                                                                                                                                                                                                                                                   |                                                                                                                                                                                                                                                                                              |
| Official name of the Network                                                | <b>European Crop Protection Association</b>                                                                                                                                                                                                                                                                                                                                                       |                                                                                                                                                                                                                                                                                                                                                                                                                                                                                                                   |                                                                                                                                                                                                                                                                                              |
| Other names                                                                 | ECPA                                                                                                                                                                                                                                                                                                                                                                                              |                                                                                                                                                                                                                                                                                                                                                                                                                                                                                                                   |                                                                                                                                                                                                                                                                                              |
| Type of organisation                                                        | Professional<br>Founded (unknown)                                                                                                                                                                                                                                                                                                                                                                 |                                                                                                                                                                                                                                                                                                                                                                                                                                                                                                                   |                                                                                                                                                                                                                                                                                              |
| Coordinates                                                                 | 6, Avenue E. Van Nieuwenhuysse<br>B-1160 Brussels<br><br>Fax: +32 2 663 15 60                                                                                                                                                                                                                                                                                                                     |                                                                                                                                                                                                                                                                                                                                                                                                                                                                                                                   |                                                                                                                                                                                                                                                                                              |
| Website                                                                     | <a href="http://www.ecpa.eu/">http://www.ecpa.eu/</a>                                                                                                                                                                                                                                                                                                                                             |                                                                                                                                                                                                                                                                                                                                                                                                                                                                                                                   |                                                                                                                                                                                                                                                                                              |
| Funding                                                                     | members                                                                                                                                                                                                                                                                                                                                                                                           |                                                                                                                                                                                                                                                                                                                                                                                                                                                                                                                   |                                                                                                                                                                                                                                                                                              |
| Conflict of interest                                                        | -                                                                                                                                                                                                                                                                                                                                                                                                 |                                                                                                                                                                                                                                                                                                                                                                                                                                                                                                                   |                                                                                                                                                                                                                                                                                              |
| Part of other network(s)                                                    |                                                                                                                                                                                                                                                                                                                                                                                                   |                                                                                                                                                                                                                                                                                                                                                                                                                                                                                                                   |                                                                                                                                                                                                                                                                                              |
| Grouping other network(s)                                                   | Members include all major companies and national associations across Europe                                                                                                                                                                                                                                                                                                                       |                                                                                                                                                                                                                                                                                                                                                                                                                                                                                                                   |                                                                                                                                                                                                                                                                                              |
| <b>MONITORING SUBJECT</b>                                                   |                                                                                                                                                                                                                                                                                                                                                                                                   |                                                                                                                                                                                                                                                                                                                                                                                                                                                                                                                   |                                                                                                                                                                                                                                                                                              |
| Description                                                                 | Represents the interests of the crop protection industry at European level.<br>No monitoring                                                                                                                                                                                                                                                                                                      |                                                                                                                                                                                                                                                                                                                                                                                                                                                                                                                   |                                                                                                                                                                                                                                                                                              |
| Protection goal(s) and/or influencing factor(s)                             | <input checked="" type="checkbox"/> Protection goal<br><input type="checkbox"/> Biodiversity<br><input checked="" type="checkbox"/> Human Health<br><input checked="" type="checkbox"/> Animal Health<br><input checked="" type="checkbox"/> Plant Health<br><input type="checkbox"/> Soil function<br><input type="checkbox"/> Water quality<br><input type="checkbox"/> Sustainable Agriculture | <input type="checkbox"/> Influencing factor<br><input type="checkbox"/> Agronomic practice<br><input type="checkbox"/> Plant protection<br><input type="checkbox"/> GMO cultivation<br><input type="checkbox"/> Environmental conditions                                                                                                                                                                                                                                                                          |                                                                                                                                                                                                                                                                                              |
| Duplication of Farmer's questionnaire                                       | <input checked="" type="checkbox"/> No duplication<br><input type="checkbox"/> Partly duplication<br><input type="checkbox"/> Complete duplication                                                                                                                                                                                                                                                |                                                                                                                                                                                                                                                                                                                                                                                                                                                                                                                   |                                                                                                                                                                                                                                                                                              |
| <b>SPECIFICITY</b>                                                          |                                                                                                                                                                                                                                                                                                                                                                                                   |                                                                                                                                                                                                                                                                                                                                                                                                                                                                                                                   |                                                                                                                                                                                                                                                                                              |
| Geography                                                                   | <input checked="" type="checkbox"/> EU -wide<br><input type="checkbox"/> Zone A – North<br><input type="checkbox"/> Zone B – Centre:<br><input type="checkbox"/> Zone C – South                                                                                                                                                                                                                   |                                                                                                                                                                                                                                                                                                                                                                                                                                                                                                                   |                                                                                                                                                                                                                                                                                              |
|                                                                             | <input type="checkbox"/> Denmark,<br><input type="checkbox"/> Estonia,<br><input type="checkbox"/> Latvia,<br><input type="checkbox"/> Lithuania,<br><input type="checkbox"/> Finland,<br><input type="checkbox"/> Sweden                                                                                                                                                                         | <input type="checkbox"/> Belgium,<br><input type="checkbox"/> Czech Republic<br><input type="checkbox"/> Germany,<br><input type="checkbox"/> Ireland,<br><input type="checkbox"/> Luxembourg,<br><input type="checkbox"/> Hungary,<br><input type="checkbox"/> Netherlands,<br><input type="checkbox"/> Austria,<br><input type="checkbox"/> Poland,<br><input type="checkbox"/> Romania,<br><input type="checkbox"/> Slovenia,<br><input type="checkbox"/> Slovakia,<br><input type="checkbox"/> United Kingdom | <input type="checkbox"/> Bulgaria,<br><input type="checkbox"/> Greece,<br><input type="checkbox"/> Spain,<br><input type="checkbox"/> France,<br><input type="checkbox"/> Italy,<br><input type="checkbox"/> Cyprus,<br><input type="checkbox"/> Malta,<br><input type="checkbox"/> Portugal |
|                                                                             | <input type="checkbox"/> Regional (specify)<br><input type="checkbox"/> Local (specify)                                                                                                                                                                                                                                                                                                           |                                                                                                                                                                                                                                                                                                                                                                                                                                                                                                                   |                                                                                                                                                                                                                                                                                              |
| Factors                                                                     | <input type="checkbox"/> Multiple species/items (specify)<br><input type="checkbox"/> Single species/item (specify)                                                                                                                                                                                                                                                                               |                                                                                                                                                                                                                                                                                                                                                                                                                                                                                                                   |                                                                                                                                                                                                                                                                                              |
| Crop                                                                        | <input checked="" type="checkbox"/> No specific crop(s)<br><input type="checkbox"/> Several crops (e.g. all cereals)<br><input type="checkbox"/> Single crop                                                                                                                                                                                                                                      |                                                                                                                                                                                                                                                                                                                                                                                                                                                                                                                   |                                                                                                                                                                                                                                                                                              |
| Trait /treatment                                                            | <input type="checkbox"/> No specific traits/treatments<br><input checked="" type="checkbox"/> Several traits/treatments<br><input type="checkbox"/> Single trait/treatment                                                                                                                                                                                                                        |                                                                                                                                                                                                                                                                                                                                                                                                                                                                                                                   |                                                                                                                                                                                                                                                                                              |
| GMO                                                                         | <input checked="" type="checkbox"/> No GMO bias<br><input type="checkbox"/> GMO specific                                                                                                                                                                                                                                                                                                          |                                                                                                                                                                                                                                                                                                                                                                                                                                                                                                                   |                                                                                                                                                                                                                                                                                              |
| <b>METHODOLOGY</b>                                                          |                                                                                                                                                                                                                                                                                                                                                                                                   |                                                                                                                                                                                                                                                                                                                                                                                                                                                                                                                   |                                                                                                                                                                                                                                                                                              |
| Observations                                                                | <input type="checkbox"/> Reported, verifiable methodology                                                                                                                                                                                                                                                                                                                                         |                                                                                                                                                                                                                                                                                                                                                                                                                                                                                                                   |                                                                                                                                                                                                                                                                                              |

|                                                  |                                                                                                                                                                                                                                                             |
|--------------------------------------------------|-------------------------------------------------------------------------------------------------------------------------------------------------------------------------------------------------------------------------------------------------------------|
|                                                  | <input type="checkbox"/> Reported, unverifiable methodology<br><input type="checkbox"/> Unknown, unverifiable methodology                                                                                                                                   |
| Frequency                                        | <input type="checkbox"/> > 1 time/year<br><input type="checkbox"/> 1 time/year<br><input type="checkbox"/> < 1 time/year                                                                                                                                    |
| Future                                           | <input type="checkbox"/> For $\geq 5$ years<br><input type="checkbox"/> between 1 and 5 years<br><input type="checkbox"/> no prospect                                                                                                                       |
| Quality of performers                            | <input type="checkbox"/> Trained, professionals<br><input type="checkbox"/> Trained, non-professionals<br><input type="checkbox"/> Uncertain or not -specified                                                                                              |
| Quality of data                                  | <input type="checkbox"/> Standard recording of raw data<br><input type="checkbox"/> Free recording of raw data<br><input type="checkbox"/> Anecdotic                                                                                                        |
| Analysis                                         | <input type="checkbox"/> Reported, verifiable methodology<br><input type="checkbox"/> Reported, unverifiable methodology<br><input type="checkbox"/> Unknown, unverifiable methodology                                                                      |
| Quality of analysis                              | <input type="checkbox"/> Scientifically based<br><input type="checkbox"/> Indicative only<br><input type="checkbox"/> Unknown                                                                                                                               |
| <b>REPORTING</b>                                 |                                                                                                                                                                                                                                                             |
| Language                                         | Reporting language(s): English                                                                                                                                                                                                                              |
| Availability                                     | <input type="checkbox"/> Scientific publication<br><input type="checkbox"/> Official report available on the internet or in other public forum<br><input type="checkbox"/> Official report available from network<br><input type="checkbox"/> Not available |
| Frequency                                        | <input checked="" type="checkbox"/> $\geq 1$ time/year –<br><input type="checkbox"/> < 1 time/year –                                                                                                                                                        |
| Historical reference                             | <input checked="" type="checkbox"/> over $\geq 5$ years<br><input type="checkbox"/> between 1 and 5 years<br><input type="checkbox"/> no historical analysis                                                                                                |
| <b>COMMENT(S)</b>                                |                                                                                                                                                                                                                                                             |
| General background information on pesticide use. |                                                                                                                                                                                                                                                             |

## GSEN-09-0156.00.1 EU – The European Birds Census Council

| EuropaBio's coordinated approach to General Surveillance: Existing Networks             |                                                                                                                                                                                                                                                                                                                                       |                                                                                                                                                                                                                                                                                                                                                                                                                                                                                                                   |                                                                                                                                                                                                                                                                                              |
|-----------------------------------------------------------------------------------------|---------------------------------------------------------------------------------------------------------------------------------------------------------------------------------------------------------------------------------------------------------------------------------------------------------------------------------------|-------------------------------------------------------------------------------------------------------------------------------------------------------------------------------------------------------------------------------------------------------------------------------------------------------------------------------------------------------------------------------------------------------------------------------------------------------------------------------------------------------------------|----------------------------------------------------------------------------------------------------------------------------------------------------------------------------------------------------------------------------------------------------------------------------------------------|
| ORGANISATION                                                                            |                                                                                                                                                                                                                                                                                                                                       |                                                                                                                                                                                                                                                                                                                                                                                                                                                                                                                   |                                                                                                                                                                                                                                                                                              |
| EuropaBio reference                                                                     | GS-EN-09-0156                                                                                                                                                                                                                                                                                                                         |                                                                                                                                                                                                                                                                                                                                                                                                                                                                                                                   |                                                                                                                                                                                                                                                                                              |
| Official name of the Network                                                            | The European Birds Census Council                                                                                                                                                                                                                                                                                                     |                                                                                                                                                                                                                                                                                                                                                                                                                                                                                                                   |                                                                                                                                                                                                                                                                                              |
| Other names                                                                             | EBCC                                                                                                                                                                                                                                                                                                                                  |                                                                                                                                                                                                                                                                                                                                                                                                                                                                                                                   |                                                                                                                                                                                                                                                                                              |
| Type of organisation                                                                    | Nature conservation<br>Founded 1969(?)                                                                                                                                                                                                                                                                                                |                                                                                                                                                                                                                                                                                                                                                                                                                                                                                                                   |                                                                                                                                                                                                                                                                                              |
| Coordinates                                                                             | Contact: <a href="mailto:info@ebcc.info">info@ebcc.info</a><br>List of country delegates : <a href="http://www.ebcc.info/index.php?ID=2">http://www.ebcc.info/index.php?ID=2</a>                                                                                                                                                      |                                                                                                                                                                                                                                                                                                                                                                                                                                                                                                                   |                                                                                                                                                                                                                                                                                              |
| Website                                                                                 | <a href="http://www.ebcc.info">http://www.ebcc.info</a>                                                                                                                                                                                                                                                                               |                                                                                                                                                                                                                                                                                                                                                                                                                                                                                                                   |                                                                                                                                                                                                                                                                                              |
| Funding                                                                                 | Members (national delegates), donations, subsidies, beneficiary under a will, royalties from publications                                                                                                                                                                                                                             |                                                                                                                                                                                                                                                                                                                                                                                                                                                                                                                   |                                                                                                                                                                                                                                                                                              |
| Conflict of interest                                                                    | -                                                                                                                                                                                                                                                                                                                                     |                                                                                                                                                                                                                                                                                                                                                                                                                                                                                                                   |                                                                                                                                                                                                                                                                                              |
| Part of other network(s)                                                                | -                                                                                                                                                                                                                                                                                                                                     |                                                                                                                                                                                                                                                                                                                                                                                                                                                                                                                   |                                                                                                                                                                                                                                                                                              |
| Grouping other network(s)                                                               | National ornithology societies                                                                                                                                                                                                                                                                                                        |                                                                                                                                                                                                                                                                                                                                                                                                                                                                                                                   |                                                                                                                                                                                                                                                                                              |
| MONITORING SUBJECT                                                                      |                                                                                                                                                                                                                                                                                                                                       |                                                                                                                                                                                                                                                                                                                                                                                                                                                                                                                   |                                                                                                                                                                                                                                                                                              |
| Description                                                                             | Association of like-minded expert ornithologists co-operating in a range of ways to improve bird monitoring and atlas work and thereby inform and improve the management and conservation of birds populations in Europe.<br>Organises together with BirdLife International the "Pan-European Common Bird Monitoring" (started 2002). |                                                                                                                                                                                                                                                                                                                                                                                                                                                                                                                   |                                                                                                                                                                                                                                                                                              |
| Protection goal(s) and/or influencing factor(s)                                         | <input checked="" type="checkbox"/> Protection goal                                                                                                                                                                                                                                                                                   | <input type="checkbox"/> Influencing factor                                                                                                                                                                                                                                                                                                                                                                                                                                                                       |                                                                                                                                                                                                                                                                                              |
|                                                                                         | <input checked="" type="checkbox"/> Biodiversity: Birds<br><input type="checkbox"/> Human Health<br><input type="checkbox"/> Animal Health<br><input type="checkbox"/> Plant Health<br><input type="checkbox"/> Soil function<br><input type="checkbox"/> Water quality<br><input type="checkbox"/> Sustainable Agriculture           | <input type="checkbox"/> Agronomic practice<br><input type="checkbox"/> Plant protection<br><input type="checkbox"/> GMO cultivation<br><input type="checkbox"/> Environmental conditions                                                                                                                                                                                                                                                                                                                         |                                                                                                                                                                                                                                                                                              |
| Duplication of Farmer's questionnaire                                                   | <input checked="" type="checkbox"/> No duplication<br><input type="checkbox"/> Partly duplication<br><input type="checkbox"/> Complete duplication                                                                                                                                                                                    |                                                                                                                                                                                                                                                                                                                                                                                                                                                                                                                   |                                                                                                                                                                                                                                                                                              |
| SPECIFICITY                                                                             |                                                                                                                                                                                                                                                                                                                                       |                                                                                                                                                                                                                                                                                                                                                                                                                                                                                                                   |                                                                                                                                                                                                                                                                                              |
| Geography                                                                               | <input checked="" type="checkbox"/> EU -wide                                                                                                                                                                                                                                                                                          |                                                                                                                                                                                                                                                                                                                                                                                                                                                                                                                   |                                                                                                                                                                                                                                                                                              |
|                                                                                         | <input type="checkbox"/> Zone A – North                                                                                                                                                                                                                                                                                               | <input type="checkbox"/> Zone B – Centre:                                                                                                                                                                                                                                                                                                                                                                                                                                                                         | <input type="checkbox"/> Zone C – South                                                                                                                                                                                                                                                      |
|                                                                                         | <input type="checkbox"/> Denmark,<br><input type="checkbox"/> Estonia,<br><input type="checkbox"/> Latvia,<br><input type="checkbox"/> Lithuania,<br><input type="checkbox"/> Finland,<br><input type="checkbox"/> Sweden                                                                                                             | <input type="checkbox"/> Belgium,<br><input type="checkbox"/> Czech Republic<br><input type="checkbox"/> Germany,<br><input type="checkbox"/> Ireland,<br><input type="checkbox"/> Luxembourg,<br><input type="checkbox"/> Hungary,<br><input type="checkbox"/> Netherlands,<br><input type="checkbox"/> Austria,<br><input type="checkbox"/> Poland,<br><input type="checkbox"/> Romania,<br><input type="checkbox"/> Slovenia,<br><input type="checkbox"/> Slovakia,<br><input type="checkbox"/> United Kingdom | <input type="checkbox"/> Bulgaria,<br><input type="checkbox"/> Greece,<br><input type="checkbox"/> Spain,<br><input type="checkbox"/> France,<br><input type="checkbox"/> Italy,<br><input type="checkbox"/> Cyprus,<br><input type="checkbox"/> Malta,<br><input type="checkbox"/> Portugal |
| <input type="checkbox"/> Regional (specify)<br><input type="checkbox"/> Local (specify) |                                                                                                                                                                                                                                                                                                                                       |                                                                                                                                                                                                                                                                                                                                                                                                                                                                                                                   |                                                                                                                                                                                                                                                                                              |
| Factors                                                                                 | <input checked="" type="checkbox"/> Multiple species/items (specify): birds<br><input type="checkbox"/> Single species/item (specify)                                                                                                                                                                                                 |                                                                                                                                                                                                                                                                                                                                                                                                                                                                                                                   |                                                                                                                                                                                                                                                                                              |
| Crop                                                                                    | <input checked="" type="checkbox"/> No specific crop(s)<br><input type="checkbox"/> Several crops (e.g. all cereals)<br><input type="checkbox"/> Single crop                                                                                                                                                                          |                                                                                                                                                                                                                                                                                                                                                                                                                                                                                                                   |                                                                                                                                                                                                                                                                                              |
| Trait /treatment                                                                        | <input checked="" type="checkbox"/> No specific traits/treatments<br><input type="checkbox"/> Several traits/treatments<br><input type="checkbox"/> Single trait/treatment                                                                                                                                                            |                                                                                                                                                                                                                                                                                                                                                                                                                                                                                                                   |                                                                                                                                                                                                                                                                                              |
| GMO                                                                                     | <input checked="" type="checkbox"/> No GMO bias<br><input type="checkbox"/> GMO specific                                                                                                                                                                                                                                              |                                                                                                                                                                                                                                                                                                                                                                                                                                                                                                                   |                                                                                                                                                                                                                                                                                              |
| METHODOLOGY                                                                             |                                                                                                                                                                                                                                                                                                                                       |                                                                                                                                                                                                                                                                                                                                                                                                                                                                                                                   |                                                                                                                                                                                                                                                                                              |



|                                                                                                                       |                                                                                                                                                                                                                                                                                              |
|-----------------------------------------------------------------------------------------------------------------------|----------------------------------------------------------------------------------------------------------------------------------------------------------------------------------------------------------------------------------------------------------------------------------------------|
| Observations                                                                                                          | <input type="checkbox"/> Reported, verifiable methodology<br><input type="checkbox"/> Reported, unverifiable methodology<br><input type="checkbox"/> Unknown, unverifiable methodology                                                                                                       |
| Frequency                                                                                                             | <input type="checkbox"/> > 1 time/year<br><input type="checkbox"/> 1 time/year<br><input type="checkbox"/> < 1 time/year                                                                                                                                                                     |
| Future                                                                                                                | <input type="checkbox"/> For ≥ 5 years<br><input type="checkbox"/> between 1 and 5 years<br><input type="checkbox"/> no prospect                                                                                                                                                             |
| Quality of performers                                                                                                 | <input type="checkbox"/> Trained, professionals<br><input type="checkbox"/> Trained, non-professionals – training by documentation, volunteers<br><input type="checkbox"/> Uncertain or not -specified                                                                                       |
| Quality of data                                                                                                       | <input type="checkbox"/> Standard recording of raw data<br><input type="checkbox"/> Free recording of raw data<br><input type="checkbox"/> Anecdotic                                                                                                                                         |
| Analysis                                                                                                              | <input type="checkbox"/> Reported, verifiable methodology<br><input type="checkbox"/> Reported, unverifiable methodology<br><input type="checkbox"/> Unknown, unverifiable methodology                                                                                                       |
| Quality of analysis                                                                                                   | <input type="checkbox"/> Scientifically based<br><input type="checkbox"/> Indicative only<br><input type="checkbox"/> Unknown                                                                                                                                                                |
| <b>REPORTING</b>                                                                                                      |                                                                                                                                                                                                                                                                                              |
| Language                                                                                                              | Specify reporting language(s): English                                                                                                                                                                                                                                                       |
| Availability                                                                                                          | <input checked="" type="checkbox"/> Scientific publication<br><input checked="" type="checkbox"/> Official report available on the internet or in other public forum<br><input checked="" type="checkbox"/> Official report available from network<br><input type="checkbox"/> Not available |
| Frequency                                                                                                             | <input checked="" type="checkbox"/> ≥ 1 time/year – Yearly country reports, scientific publications<br><input type="checkbox"/> < 1 time/year – Books                                                                                                                                        |
| Historical reference                                                                                                  | <input checked="" type="checkbox"/> over ≥ 5 years<br><input type="checkbox"/> between 1 and 5 years<br><input type="checkbox"/> no historical analysis                                                                                                                                      |
| <b>COMMENT(S)</b>                                                                                                     |                                                                                                                                                                                                                                                                                              |
| A broad general monitoring network using important bird species as representative indicators and as protection goals. |                                                                                                                                                                                                                                                                                              |

## GSEN-09-0158.00.1 EU – European Conservation Agriculture Federation

| EuropaBio's coordinated approach to General Surveillance: Existing Networks |                                                                                                                                                                                                                                                                                                                                                                                 |                                                                                                                                                                                                                                                                                                                                                                                                                                                                                                                   |                                                                                                                                                                                                                                                                                              |
|-----------------------------------------------------------------------------|---------------------------------------------------------------------------------------------------------------------------------------------------------------------------------------------------------------------------------------------------------------------------------------------------------------------------------------------------------------------------------|-------------------------------------------------------------------------------------------------------------------------------------------------------------------------------------------------------------------------------------------------------------------------------------------------------------------------------------------------------------------------------------------------------------------------------------------------------------------------------------------------------------------|----------------------------------------------------------------------------------------------------------------------------------------------------------------------------------------------------------------------------------------------------------------------------------------------|
| ORGANISATION                                                                |                                                                                                                                                                                                                                                                                                                                                                                 |                                                                                                                                                                                                                                                                                                                                                                                                                                                                                                                   |                                                                                                                                                                                                                                                                                              |
| EuropaBio reference                                                         | GS-EN-09-0158                                                                                                                                                                                                                                                                                                                                                                   |                                                                                                                                                                                                                                                                                                                                                                                                                                                                                                                   |                                                                                                                                                                                                                                                                                              |
| Official name of the Network                                                | European Conservation Agriculture Federation                                                                                                                                                                                                                                                                                                                                    |                                                                                                                                                                                                                                                                                                                                                                                                                                                                                                                   |                                                                                                                                                                                                                                                                                              |
| Other names                                                                 | ECAAF                                                                                                                                                                                                                                                                                                                                                                           |                                                                                                                                                                                                                                                                                                                                                                                                                                                                                                                   |                                                                                                                                                                                                                                                                                              |
| Type of organisation                                                        | Professional<br>Founded 1999                                                                                                                                                                                                                                                                                                                                                    |                                                                                                                                                                                                                                                                                                                                                                                                                                                                                                                   |                                                                                                                                                                                                                                                                                              |
| Coordinates                                                                 | Rond Point Schuman, 6, box 5<br>B-1040 Brussels<br>Belgium<br><br>Fax: +32 2 234 79 11                                                                                                                                                                                                                                                                                          |                                                                                                                                                                                                                                                                                                                                                                                                                                                                                                                   |                                                                                                                                                                                                                                                                                              |
| Website                                                                     | <a href="http://www.ecaf.org/">http://www.ecaf.org/</a>                                                                                                                                                                                                                                                                                                                         |                                                                                                                                                                                                                                                                                                                                                                                                                                                                                                                   |                                                                                                                                                                                                                                                                                              |
| Funding                                                                     | members                                                                                                                                                                                                                                                                                                                                                                         |                                                                                                                                                                                                                                                                                                                                                                                                                                                                                                                   |                                                                                                                                                                                                                                                                                              |
| Conflict of interest                                                        | -                                                                                                                                                                                                                                                                                                                                                                               |                                                                                                                                                                                                                                                                                                                                                                                                                                                                                                                   |                                                                                                                                                                                                                                                                                              |
| Part of other network(s)                                                    |                                                                                                                                                                                                                                                                                                                                                                                 |                                                                                                                                                                                                                                                                                                                                                                                                                                                                                                                   |                                                                                                                                                                                                                                                                                              |
| Grouping other network(s)                                                   | fifteen national associations                                                                                                                                                                                                                                                                                                                                                   |                                                                                                                                                                                                                                                                                                                                                                                                                                                                                                                   |                                                                                                                                                                                                                                                                                              |
| MONITORING SUBJECT                                                          |                                                                                                                                                                                                                                                                                                                                                                                 |                                                                                                                                                                                                                                                                                                                                                                                                                                                                                                                   |                                                                                                                                                                                                                                                                                              |
| Description                                                                 | Promotes among Europe's farmers the soil management "best practice" aspects of conservation agriculture.<br>No monitoring                                                                                                                                                                                                                                                       |                                                                                                                                                                                                                                                                                                                                                                                                                                                                                                                   |                                                                                                                                                                                                                                                                                              |
| Protection goal(s) and/or influencing factor(s)                             | <input checked="" type="checkbox"/> Protection goal<br><br><input type="checkbox"/> Biodiversity<br><input type="checkbox"/> Human Health<br><input type="checkbox"/> Animal Health<br><input type="checkbox"/> Plant Health<br><input type="checkbox"/> Soil function<br><input type="checkbox"/> Water quality<br><input checked="" type="checkbox"/> Sustainable Agriculture | <input type="checkbox"/> Influencing factor<br><br><input type="checkbox"/> Agronomic practice<br><input type="checkbox"/> Plant protection<br><input type="checkbox"/> GMO cultivation<br><input type="checkbox"/> Environmental conditions                                                                                                                                                                                                                                                                      |                                                                                                                                                                                                                                                                                              |
| Duplication of Farmer's questionnaire                                       | <input type="checkbox"/> No duplication<br><input checked="" type="checkbox"/> Partly duplication<br><input type="checkbox"/> Complete duplication                                                                                                                                                                                                                              |                                                                                                                                                                                                                                                                                                                                                                                                                                                                                                                   |                                                                                                                                                                                                                                                                                              |
| SPECIFICITY                                                                 |                                                                                                                                                                                                                                                                                                                                                                                 |                                                                                                                                                                                                                                                                                                                                                                                                                                                                                                                   |                                                                                                                                                                                                                                                                                              |
| Geography                                                                   | <input checked="" type="checkbox"/> EU -wide<br><br><input type="checkbox"/> Zone A – North<br><input type="checkbox"/> Zone B – Centre:<br><input type="checkbox"/> Zone C – South                                                                                                                                                                                             |                                                                                                                                                                                                                                                                                                                                                                                                                                                                                                                   |                                                                                                                                                                                                                                                                                              |
|                                                                             | <input type="checkbox"/> Denmark,<br><input type="checkbox"/> Estonia,<br><input type="checkbox"/> Latvia,<br><input type="checkbox"/> Lithuania,<br><input type="checkbox"/> Finland,<br><input type="checkbox"/> Sweden                                                                                                                                                       | <input type="checkbox"/> Belgium,<br><input type="checkbox"/> Czech Republic<br><input type="checkbox"/> Germany,<br><input type="checkbox"/> Ireland,<br><input type="checkbox"/> Luxembourg,<br><input type="checkbox"/> Hungary,<br><input type="checkbox"/> Netherlands,<br><input type="checkbox"/> Austria,<br><input type="checkbox"/> Poland,<br><input type="checkbox"/> Romania,<br><input type="checkbox"/> Slovenia,<br><input type="checkbox"/> Slovakia,<br><input type="checkbox"/> United Kingdom | <input type="checkbox"/> Bulgaria,<br><input type="checkbox"/> Greece,<br><input type="checkbox"/> Spain,<br><input type="checkbox"/> France,<br><input type="checkbox"/> Italy,<br><input type="checkbox"/> Cyprus,<br><input type="checkbox"/> Malta,<br><input type="checkbox"/> Portugal |
|                                                                             | <input type="checkbox"/> Regional (specify)<br><input type="checkbox"/> Local (specify)                                                                                                                                                                                                                                                                                         |                                                                                                                                                                                                                                                                                                                                                                                                                                                                                                                   |                                                                                                                                                                                                                                                                                              |
| Factors                                                                     | <input type="checkbox"/> Multiple species/items (specify): soil quality<br><input type="checkbox"/> Single species/item (specify)                                                                                                                                                                                                                                               |                                                                                                                                                                                                                                                                                                                                                                                                                                                                                                                   |                                                                                                                                                                                                                                                                                              |
| Crop                                                                        | <input checked="" type="checkbox"/> No specific crop(s)<br><input type="checkbox"/> Several crops (e.g. all cereals)<br><input type="checkbox"/> Single crop                                                                                                                                                                                                                    |                                                                                                                                                                                                                                                                                                                                                                                                                                                                                                                   |                                                                                                                                                                                                                                                                                              |
| Trait /treatment                                                            | <input type="checkbox"/> No specific traits/treatments<br><input checked="" type="checkbox"/> Several traits/treatments<br><input type="checkbox"/> Single trait/treatment                                                                                                                                                                                                      |                                                                                                                                                                                                                                                                                                                                                                                                                                                                                                                   |                                                                                                                                                                                                                                                                                              |
| GMO                                                                         | <input checked="" type="checkbox"/> No GMO bias                                                                                                                                                                                                                                                                                                                                 |                                                                                                                                                                                                                                                                                                                                                                                                                                                                                                                   |                                                                                                                                                                                                                                                                                              |

|                                            |                                                                                                                                                                                                                                                             |
|--------------------------------------------|-------------------------------------------------------------------------------------------------------------------------------------------------------------------------------------------------------------------------------------------------------------|
|                                            | <input type="checkbox"/> GMO specific                                                                                                                                                                                                                       |
| <b>METHODOLOGY</b>                         |                                                                                                                                                                                                                                                             |
| Observations                               | <input type="checkbox"/> Reported, verifiable methodology<br><input type="checkbox"/> Reported, unverifiable methodology<br><input type="checkbox"/> Unknown, unverifiable methodology                                                                      |
| Frequency                                  | <input type="checkbox"/> > 1 time/year<br><input type="checkbox"/> 1 time/year<br><input type="checkbox"/> < 1 time/year                                                                                                                                    |
| Future                                     | <input type="checkbox"/> For ≥ 5 years<br><input type="checkbox"/> between 1 and 5 years<br><input type="checkbox"/> no prospect                                                                                                                            |
| Quality of performers                      | <input type="checkbox"/> Trained, professionals<br><input type="checkbox"/> Trained, non-professionals<br><input type="checkbox"/> Uncertain or not -specified                                                                                              |
| Quality of data                            | <input type="checkbox"/> Standard recording of raw data<br><input type="checkbox"/> Free recording of raw data<br><input type="checkbox"/> Anecdotic                                                                                                        |
| Analysis                                   | <input type="checkbox"/> Reported, verifiable methodology<br><input type="checkbox"/> Reported, unverifiable methodology<br><input type="checkbox"/> Unknown, unverifiable methodology                                                                      |
| Quality of analysis                        | <input type="checkbox"/> Scientifically based<br><input type="checkbox"/> Indicative only<br><input type="checkbox"/> Unknown                                                                                                                               |
| <b>REPORTING</b>                           |                                                                                                                                                                                                                                                             |
| Language                                   | Reporting language(s): English                                                                                                                                                                                                                              |
| Availability                               | <input type="checkbox"/> Scientific publication<br><input type="checkbox"/> Official report available on the internet or in other public forum<br><input type="checkbox"/> Official report available from network<br><input type="checkbox"/> Not available |
| Frequency                                  | <input type="checkbox"/> ≥ 1 time/year –<br><input type="checkbox"/> < 1 time/year –                                                                                                                                                                        |
| Historical reference                       | <input checked="" type="checkbox"/> over ≥ 5 years<br><input type="checkbox"/> between 1 and 5 years<br><input type="checkbox"/> no historical analysis                                                                                                     |
| <b>COMMENT(S)</b>                          |                                                                                                                                                                                                                                                             |
| Information on sustainable soil management |                                                                                                                                                                                                                                                             |

## GSEN-09-0196.00.1 EU – EURING

| EuropaBio's coordinated approach to General Surveillance: Existing Networks |                                                                                                                                                                                                                                                                                                                                                                                    |                                                                                                                                                                                                                                                                                                                                                                                                                                                                                                                   |                                                                                                                                                                                                                                                                                              |
|-----------------------------------------------------------------------------|------------------------------------------------------------------------------------------------------------------------------------------------------------------------------------------------------------------------------------------------------------------------------------------------------------------------------------------------------------------------------------|-------------------------------------------------------------------------------------------------------------------------------------------------------------------------------------------------------------------------------------------------------------------------------------------------------------------------------------------------------------------------------------------------------------------------------------------------------------------------------------------------------------------|----------------------------------------------------------------------------------------------------------------------------------------------------------------------------------------------------------------------------------------------------------------------------------------------|
| <b>ORGANISATION</b>                                                         |                                                                                                                                                                                                                                                                                                                                                                                    |                                                                                                                                                                                                                                                                                                                                                                                                                                                                                                                   |                                                                                                                                                                                                                                                                                              |
| EuropaBio reference                                                         | GS-EN-09-0196                                                                                                                                                                                                                                                                                                                                                                      |                                                                                                                                                                                                                                                                                                                                                                                                                                                                                                                   |                                                                                                                                                                                                                                                                                              |
| Official name of the Network                                                | <b>EURING</b><br><b>Co-ordinated bird ringing throughout Europe</b>                                                                                                                                                                                                                                                                                                                |                                                                                                                                                                                                                                                                                                                                                                                                                                                                                                                   |                                                                                                                                                                                                                                                                                              |
| Other names                                                                 | European Union for Bird Ringing                                                                                                                                                                                                                                                                                                                                                    |                                                                                                                                                                                                                                                                                                                                                                                                                                                                                                                   |                                                                                                                                                                                                                                                                                              |
| Type of organisation                                                        | Nature conservation<br>Founded (unknown)                                                                                                                                                                                                                                                                                                                                           |                                                                                                                                                                                                                                                                                                                                                                                                                                                                                                                   |                                                                                                                                                                                                                                                                                              |
| Coordinates                                                                 | Multiple: <a href="http://www.euring.org/about_euring/board.htm">http://www.euring.org/about_euring/board.htm</a>                                                                                                                                                                                                                                                                  |                                                                                                                                                                                                                                                                                                                                                                                                                                                                                                                   |                                                                                                                                                                                                                                                                                              |
| Website                                                                     | <a href="http://www.euring.org/">http://www.euring.org/</a>                                                                                                                                                                                                                                                                                                                        |                                                                                                                                                                                                                                                                                                                                                                                                                                                                                                                   |                                                                                                                                                                                                                                                                                              |
| Funding                                                                     |                                                                                                                                                                                                                                                                                                                                                                                    |                                                                                                                                                                                                                                                                                                                                                                                                                                                                                                                   |                                                                                                                                                                                                                                                                                              |
| Conflict of interest                                                        | -                                                                                                                                                                                                                                                                                                                                                                                  |                                                                                                                                                                                                                                                                                                                                                                                                                                                                                                                   |                                                                                                                                                                                                                                                                                              |
| Part of other network(s)                                                    |                                                                                                                                                                                                                                                                                                                                                                                    |                                                                                                                                                                                                                                                                                                                                                                                                                                                                                                                   |                                                                                                                                                                                                                                                                                              |
| Grouping other network(s)                                                   | 42 National ringing schemes                                                                                                                                                                                                                                                                                                                                                        |                                                                                                                                                                                                                                                                                                                                                                                                                                                                                                                   |                                                                                                                                                                                                                                                                                              |
| <b>MONITORING SUBJECT</b>                                                   |                                                                                                                                                                                                                                                                                                                                                                                    |                                                                                                                                                                                                                                                                                                                                                                                                                                                                                                                   |                                                                                                                                                                                                                                                                                              |
| Description                                                                 | Scientific and administrative co-operation between national ringing schemes; research; conservation.                                                                                                                                                                                                                                                                               |                                                                                                                                                                                                                                                                                                                                                                                                                                                                                                                   |                                                                                                                                                                                                                                                                                              |
| Protection goal(s) and/or influencing factor(s)                             | <input checked="" type="checkbox"/> Protection goal<br><input checked="" type="checkbox"/> Biodiversity: birds<br><input type="checkbox"/> Human Health<br><input type="checkbox"/> Animal Health<br><input type="checkbox"/> Plant Health<br><input type="checkbox"/> Soil function<br><input type="checkbox"/> Water quality<br><input type="checkbox"/> Sustainable Agriculture | <input type="checkbox"/> Influencing factor<br><input type="checkbox"/> Agronomic practice<br><input type="checkbox"/> Plant protection<br><input type="checkbox"/> GMO cultivation<br><input type="checkbox"/> Environmental conditions                                                                                                                                                                                                                                                                          |                                                                                                                                                                                                                                                                                              |
| Duplication of Farmer's questionnaire                                       | <input checked="" type="checkbox"/> No duplication<br><input type="checkbox"/> Partly duplication<br><input type="checkbox"/> Complete duplication                                                                                                                                                                                                                                 |                                                                                                                                                                                                                                                                                                                                                                                                                                                                                                                   |                                                                                                                                                                                                                                                                                              |
| <b>SPECIFICITY</b>                                                          |                                                                                                                                                                                                                                                                                                                                                                                    |                                                                                                                                                                                                                                                                                                                                                                                                                                                                                                                   |                                                                                                                                                                                                                                                                                              |
| Geography                                                                   | <input checked="" type="checkbox"/> EU -wide<br><input type="checkbox"/> Zone A – North<br><input type="checkbox"/> Zone B – Centre:<br><input type="checkbox"/> Zone C – South                                                                                                                                                                                                    |                                                                                                                                                                                                                                                                                                                                                                                                                                                                                                                   |                                                                                                                                                                                                                                                                                              |
|                                                                             | <input type="checkbox"/> Denmark,<br><input type="checkbox"/> Estonia,<br><input type="checkbox"/> Latvia,<br><input type="checkbox"/> Lithuania,<br><input type="checkbox"/> Finland,<br><input type="checkbox"/> Sweden                                                                                                                                                          | <input type="checkbox"/> Belgium,<br><input type="checkbox"/> Czech Republic<br><input type="checkbox"/> Germany,<br><input type="checkbox"/> Ireland,<br><input type="checkbox"/> Luxembourg,<br><input type="checkbox"/> Hungary,<br><input type="checkbox"/> Netherlands,<br><input type="checkbox"/> Austria,<br><input type="checkbox"/> Poland,<br><input type="checkbox"/> Romania,<br><input type="checkbox"/> Slovenia,<br><input type="checkbox"/> Slovakia,<br><input type="checkbox"/> United Kingdom | <input type="checkbox"/> Bulgaria,<br><input type="checkbox"/> Greece,<br><input type="checkbox"/> Spain,<br><input type="checkbox"/> France,<br><input type="checkbox"/> Italy,<br><input type="checkbox"/> Cyprus,<br><input type="checkbox"/> Malta,<br><input type="checkbox"/> Portugal |
|                                                                             | <input type="checkbox"/> Regional (specify)<br><input type="checkbox"/> Local (specify)                                                                                                                                                                                                                                                                                            |                                                                                                                                                                                                                                                                                                                                                                                                                                                                                                                   |                                                                                                                                                                                                                                                                                              |
| Factors                                                                     | <input checked="" type="checkbox"/> Multiple species/items (specify): birds<br><input type="checkbox"/> Single species/item (specify)                                                                                                                                                                                                                                              |                                                                                                                                                                                                                                                                                                                                                                                                                                                                                                                   |                                                                                                                                                                                                                                                                                              |
| Crop                                                                        | <input checked="" type="checkbox"/> No specific crop(s)<br><input type="checkbox"/> Several crops (e.g. all cereals)<br><input type="checkbox"/> Single crop                                                                                                                                                                                                                       |                                                                                                                                                                                                                                                                                                                                                                                                                                                                                                                   |                                                                                                                                                                                                                                                                                              |
| Trait /treatment                                                            | <input checked="" type="checkbox"/> No specific traits/treatments<br><input type="checkbox"/> Several traits/treatments<br><input type="checkbox"/> Single trait/treatment                                                                                                                                                                                                         |                                                                                                                                                                                                                                                                                                                                                                                                                                                                                                                   |                                                                                                                                                                                                                                                                                              |
| GMO                                                                         | <input checked="" type="checkbox"/> No GMO bias<br><input type="checkbox"/> GMO specific                                                                                                                                                                                                                                                                                           |                                                                                                                                                                                                                                                                                                                                                                                                                                                                                                                   |                                                                                                                                                                                                                                                                                              |
| <b>METHODOLOGY</b>                                                          |                                                                                                                                                                                                                                                                                                                                                                                    |                                                                                                                                                                                                                                                                                                                                                                                                                                                                                                                   |                                                                                                                                                                                                                                                                                              |
| Observations                                                                | <input type="checkbox"/> Reported, verifiable methodology<br><input type="checkbox"/> Reported, unverifiable methodology<br><input type="checkbox"/> Unknown, unverifiable methodology                                                                                                                                                                                             |                                                                                                                                                                                                                                                                                                                                                                                                                                                                                                                   |                                                                                                                                                                                                                                                                                              |

|                                                                                                                                            |                                                                                                                                                                                                                                                                        |
|--------------------------------------------------------------------------------------------------------------------------------------------|------------------------------------------------------------------------------------------------------------------------------------------------------------------------------------------------------------------------------------------------------------------------|
| Frequency                                                                                                                                  | <input type="checkbox"/> > 1 time/year<br><input type="checkbox"/> 1 time/year<br><input type="checkbox"/> < 1 time/year                                                                                                                                               |
| Future                                                                                                                                     | <input type="checkbox"/> For ≥ 5 years<br><input type="checkbox"/> between 1 and 5 years<br><input type="checkbox"/> no prospect                                                                                                                                       |
| Quality of performers                                                                                                                      | <input type="checkbox"/> Trained, professionals<br><input type="checkbox"/> Trained, non-professionals – training by documentation, volunteers<br><input type="checkbox"/> Uncertain or not -specified                                                                 |
| Quality of data                                                                                                                            | <input type="checkbox"/> Standard recording of raw data<br><input type="checkbox"/> Free recording of raw data<br><input type="checkbox"/> Anecdotic                                                                                                                   |
| Analysis                                                                                                                                   | <input type="checkbox"/> Reported, verifiable methodology<br><input type="checkbox"/> Reported, unverifiable methodology<br><input type="checkbox"/> Unknown, unverifiable methodology                                                                                 |
| Quality of analysis                                                                                                                        | <input type="checkbox"/> Scientifically based<br><input type="checkbox"/> Indicative only<br><input type="checkbox"/> Unknown                                                                                                                                          |
| <b>REPORTING</b>                                                                                                                           |                                                                                                                                                                                                                                                                        |
| Language                                                                                                                                   | Reporting language(s): English                                                                                                                                                                                                                                         |
| Availability                                                                                                                               | <input type="checkbox"/> Scientific publication<br><input checked="" type="checkbox"/> Official report available on the internet or in other public forum<br><input type="checkbox"/> Official report available from network<br><input type="checkbox"/> Not available |
| Frequency                                                                                                                                  | <input type="checkbox"/> ≥ 1 time/year –<br><input type="checkbox"/> < 1 time/year –                                                                                                                                                                                   |
| Historical reference                                                                                                                       | <input checked="" type="checkbox"/> over ≥ 5 years<br><input type="checkbox"/> between 1 and 5 years<br><input type="checkbox"/> no historical analysis                                                                                                                |
| <b>COMMENT(S)</b>                                                                                                                          |                                                                                                                                                                                                                                                                        |
| Migration atlases; migration maps; national reports; the EURING databank (EDB, paid service): summaries per species and distribution maps. |                                                                                                                                                                                                                                                                        |

## GSEN-09-0197.00.1 EU – ETC-W

| EuropaBio's coordinated approach to General Surveillance: Existing Networks |                                                                                                                                                                                                                                                                                                                                                            |                                                                                                                                                                                                                                                                                                                                                                                                                                                                                                                   |                                                                                                                                                                                                                                                                                              |
|-----------------------------------------------------------------------------|------------------------------------------------------------------------------------------------------------------------------------------------------------------------------------------------------------------------------------------------------------------------------------------------------------------------------------------------------------|-------------------------------------------------------------------------------------------------------------------------------------------------------------------------------------------------------------------------------------------------------------------------------------------------------------------------------------------------------------------------------------------------------------------------------------------------------------------------------------------------------------------|----------------------------------------------------------------------------------------------------------------------------------------------------------------------------------------------------------------------------------------------------------------------------------------------|
| <b>ORGANISATION</b>                                                         |                                                                                                                                                                                                                                                                                                                                                            |                                                                                                                                                                                                                                                                                                                                                                                                                                                                                                                   |                                                                                                                                                                                                                                                                                              |
| EuropaBio reference                                                         | GS-EN-09-0197                                                                                                                                                                                                                                                                                                                                              |                                                                                                                                                                                                                                                                                                                                                                                                                                                                                                                   |                                                                                                                                                                                                                                                                                              |
| Official name of the Network                                                | <b>European Topic Centre on Water Eionet Water</b>                                                                                                                                                                                                                                                                                                         |                                                                                                                                                                                                                                                                                                                                                                                                                                                                                                                   |                                                                                                                                                                                                                                                                                              |
| Other names                                                                 | ETC/W (formerly EUROWATERNET)                                                                                                                                                                                                                                                                                                                              |                                                                                                                                                                                                                                                                                                                                                                                                                                                                                                                   |                                                                                                                                                                                                                                                                                              |
| Type of organisation                                                        | Governmental                                                                                                                                                                                                                                                                                                                                               |                                                                                                                                                                                                                                                                                                                                                                                                                                                                                                                   |                                                                                                                                                                                                                                                                                              |
| Coordinates                                                                 | Managed by<br>Cenia, Czech Environmental Information Agency<br>Litevská 8<br>10005 Prague 10<br><br><a href="http://www.cenia.cz">http://www.cenia.cz</a>                                                                                                                                                                                                  |                                                                                                                                                                                                                                                                                                                                                                                                                                                                                                                   |                                                                                                                                                                                                                                                                                              |
| Website                                                                     | <a href="http://water.eionet.europa.eu/">http://water.eionet.europa.eu/</a>                                                                                                                                                                                                                                                                                |                                                                                                                                                                                                                                                                                                                                                                                                                                                                                                                   |                                                                                                                                                                                                                                                                                              |
| Funding                                                                     |                                                                                                                                                                                                                                                                                                                                                            |                                                                                                                                                                                                                                                                                                                                                                                                                                                                                                                   |                                                                                                                                                                                                                                                                                              |
| Conflict of interest                                                        | -                                                                                                                                                                                                                                                                                                                                                          |                                                                                                                                                                                                                                                                                                                                                                                                                                                                                                                   |                                                                                                                                                                                                                                                                                              |
| Part of other network(s)                                                    | -                                                                                                                                                                                                                                                                                                                                                          |                                                                                                                                                                                                                                                                                                                                                                                                                                                                                                                   |                                                                                                                                                                                                                                                                                              |
| Grouping other network(s)                                                   | Consortium of 12 European organisations to support the European Environment Agency (EEA)                                                                                                                                                                                                                                                                   |                                                                                                                                                                                                                                                                                                                                                                                                                                                                                                                   |                                                                                                                                                                                                                                                                                              |
| <b>MONITORING SUBJECT</b>                                                   |                                                                                                                                                                                                                                                                                                                                                            |                                                                                                                                                                                                                                                                                                                                                                                                                                                                                                                   |                                                                                                                                                                                                                                                                                              |
| Description                                                                 | To deliver timely, targeted, relevant and reliable information to policy-makers and the public on water: groundwater, freshwater and marine water                                                                                                                                                                                                          |                                                                                                                                                                                                                                                                                                                                                                                                                                                                                                                   |                                                                                                                                                                                                                                                                                              |
| Protection goal(s) and/or Influencing factor (s)                            | <input type="checkbox"/> Protection goal<br><br><input type="checkbox"/> Biodiversity:<br><input type="checkbox"/> Human Health<br><input type="checkbox"/> Animal Health<br><input type="checkbox"/> Plant Health<br><input type="checkbox"/> Soil function<br><input type="checkbox"/> Water quality<br><input type="checkbox"/> Sustainable Agriculture | <input type="checkbox"/> Influencing factor<br><br><input type="checkbox"/> Agronomic practice<br><input type="checkbox"/> Plant protection<br><input type="checkbox"/> GMO cultivation<br><input type="checkbox"/> Environmental conditions                                                                                                                                                                                                                                                                      |                                                                                                                                                                                                                                                                                              |
| Duplication of Farmer's questionnaire                                       | <input checked="" type="checkbox"/> No duplication<br><input checked="" type="checkbox"/> Partly duplication<br><input type="checkbox"/> Complete duplication                                                                                                                                                                                              |                                                                                                                                                                                                                                                                                                                                                                                                                                                                                                                   |                                                                                                                                                                                                                                                                                              |
| <b>SPECIFICITY</b>                                                          |                                                                                                                                                                                                                                                                                                                                                            |                                                                                                                                                                                                                                                                                                                                                                                                                                                                                                                   |                                                                                                                                                                                                                                                                                              |
| Geography                                                                   | <input checked="" type="checkbox"/> EU -wide<br><br><input type="checkbox"/> Zone A – North<br><input type="checkbox"/> Zone B – Centre<br><input type="checkbox"/> Zone C – South                                                                                                                                                                         |                                                                                                                                                                                                                                                                                                                                                                                                                                                                                                                   |                                                                                                                                                                                                                                                                                              |
|                                                                             | <input type="checkbox"/> Denmark,<br><input type="checkbox"/> Estonia,<br><input type="checkbox"/> Latvia,<br><input type="checkbox"/> Lithuania,<br><input type="checkbox"/> Finland,<br><input type="checkbox"/> Sweden                                                                                                                                  | <input type="checkbox"/> Belgium,<br><input type="checkbox"/> Czech Republic<br><input type="checkbox"/> Germany,<br><input type="checkbox"/> Ireland,<br><input type="checkbox"/> Luxembourg,<br><input type="checkbox"/> Hungary,<br><input type="checkbox"/> Netherlands,<br><input type="checkbox"/> Austria,<br><input type="checkbox"/> Poland,<br><input type="checkbox"/> Romania,<br><input type="checkbox"/> Slovenia,<br><input type="checkbox"/> Slovakia,<br><input type="checkbox"/> United Kingdom | <input type="checkbox"/> Bulgaria,<br><input type="checkbox"/> Greece,<br><input type="checkbox"/> Spain,<br><input type="checkbox"/> France,<br><input type="checkbox"/> Italy,<br><input type="checkbox"/> Cyprus,<br><input type="checkbox"/> Malta,<br><input type="checkbox"/> Portugal |
|                                                                             | <input type="checkbox"/> Regional (specify)<br><input type="checkbox"/> Local (specify)                                                                                                                                                                                                                                                                    |                                                                                                                                                                                                                                                                                                                                                                                                                                                                                                                   |                                                                                                                                                                                                                                                                                              |
| Factors                                                                     | <input checked="" type="checkbox"/> Multiple species/items (specify): water quality: rivers, lakes, groundwater, coastal and marine<br><input type="checkbox"/> Single species/item (specify)                                                                                                                                                              |                                                                                                                                                                                                                                                                                                                                                                                                                                                                                                                   |                                                                                                                                                                                                                                                                                              |
| Crop                                                                        | <input checked="" type="checkbox"/> No specific crop(s)<br><input type="checkbox"/> Several crops (e.g. all cereals)<br><input type="checkbox"/> Single crop                                                                                                                                                                                               |                                                                                                                                                                                                                                                                                                                                                                                                                                                                                                                   |                                                                                                                                                                                                                                                                                              |
| Trait /treatment                                                            | <input checked="" type="checkbox"/> No specific traits/treatments<br><input type="checkbox"/> Several traits/treatments<br><input type="checkbox"/> Single trait/treatment                                                                                                                                                                                 |                                                                                                                                                                                                                                                                                                                                                                                                                                                                                                                   |                                                                                                                                                                                                                                                                                              |
| GMO                                                                         | <input checked="" type="checkbox"/> No GMO bias<br><input type="checkbox"/> GMO specific                                                                                                                                                                                                                                                                   |                                                                                                                                                                                                                                                                                                                                                                                                                                                                                                                   |                                                                                                                                                                                                                                                                                              |
| <b>METHODOLOGY</b>                                                          |                                                                                                                                                                                                                                                                                                                                                            |                                                                                                                                                                                                                                                                                                                                                                                                                                                                                                                   |                                                                                                                                                                                                                                                                                              |

|                                         |                                                                                                                                                                                                                                                                        |
|-----------------------------------------|------------------------------------------------------------------------------------------------------------------------------------------------------------------------------------------------------------------------------------------------------------------------|
| Observations                            | <input type="checkbox"/> Reported, verifiable methodology<br><input checked="" type="checkbox"/> Reported, unverifiable methodology<br><input type="checkbox"/> Unknown, unverifiable methodology                                                                      |
| Frequency                               | <input checked="" type="checkbox"/> > 1 time/year<br><input type="checkbox"/> 1 time/year<br><input type="checkbox"/> < 1 time/year                                                                                                                                    |
| Future                                  | <input checked="" type="checkbox"/> For ≥ 5 years<br><input type="checkbox"/> between 1 and 5 years<br><input type="checkbox"/> no prospect                                                                                                                            |
| Quality of performers                   | <input checked="" type="checkbox"/> Trained, professionals<br><input type="checkbox"/> Trained, non-professionals – training by documentation, volunteers<br><input type="checkbox"/> Uncertain or not -specified                                                      |
| Quality of data                         | <input checked="" type="checkbox"/> Standard recording of raw data<br><input type="checkbox"/> Free recording of raw data<br><input type="checkbox"/> Anecdotic                                                                                                        |
| Analysis                                | <input type="checkbox"/> Reported, verifiable methodology<br><input checked="" type="checkbox"/> Reported, unverifiable methodology<br><input type="checkbox"/> Unknown, unverifiable methodology                                                                      |
| Quality of analysis                     | <input type="checkbox"/> Scientifically based<br><input type="checkbox"/> Indicative only<br><input type="checkbox"/> Unknown                                                                                                                                          |
| <b>REPORTING</b>                        |                                                                                                                                                                                                                                                                        |
| Language                                | Reporting language(s): English                                                                                                                                                                                                                                         |
| Availability                            | <input type="checkbox"/> Scientific publication<br><input checked="" type="checkbox"/> Official report available on the internet or in other public forum<br><input type="checkbox"/> Official report available from network<br><input type="checkbox"/> Not available |
| Frequency                               | <input checked="" type="checkbox"/> ≥ 1 time/year – bulletins on several topics, country reports<br><input type="checkbox"/> < 1 time/year –                                                                                                                           |
| Historical reference                    | <input checked="" type="checkbox"/> over ≥ 5 years<br><input type="checkbox"/> between 1 and 5 years<br><input type="checkbox"/> no historical analysis                                                                                                                |
| <b>COMMENT(S)</b>                       |                                                                                                                                                                                                                                                                        |
| Information on water quality for policy |                                                                                                                                                                                                                                                                        |

## GSEN-09-0198.00.1 EU – ESDAC

| EuropaBio's coordinated approach to General Surveillance: Existing Networks |                                                                                                                                                                                                                                                                                                                                                                       |                                                                                                                                                                                                                                                                                                                                                                                                                                                                                                                   |                                                                                                                                                                                                                                                                                              |
|-----------------------------------------------------------------------------|-----------------------------------------------------------------------------------------------------------------------------------------------------------------------------------------------------------------------------------------------------------------------------------------------------------------------------------------------------------------------|-------------------------------------------------------------------------------------------------------------------------------------------------------------------------------------------------------------------------------------------------------------------------------------------------------------------------------------------------------------------------------------------------------------------------------------------------------------------------------------------------------------------|----------------------------------------------------------------------------------------------------------------------------------------------------------------------------------------------------------------------------------------------------------------------------------------------|
| <b>ORGANISATION</b>                                                         |                                                                                                                                                                                                                                                                                                                                                                       |                                                                                                                                                                                                                                                                                                                                                                                                                                                                                                                   |                                                                                                                                                                                                                                                                                              |
| EuropaBio reference                                                         | GS-EN-09-0198                                                                                                                                                                                                                                                                                                                                                         |                                                                                                                                                                                                                                                                                                                                                                                                                                                                                                                   |                                                                                                                                                                                                                                                                                              |
| Official name of the Network                                                | <b>European Soil Data Centre</b>                                                                                                                                                                                                                                                                                                                                      |                                                                                                                                                                                                                                                                                                                                                                                                                                                                                                                   |                                                                                                                                                                                                                                                                                              |
| Other names                                                                 | ESDAC                                                                                                                                                                                                                                                                                                                                                                 |                                                                                                                                                                                                                                                                                                                                                                                                                                                                                                                   |                                                                                                                                                                                                                                                                                              |
| Type of organisation                                                        | Governmental<br>Founded 2005                                                                                                                                                                                                                                                                                                                                          |                                                                                                                                                                                                                                                                                                                                                                                                                                                                                                                   |                                                                                                                                                                                                                                                                                              |
| Coordinates                                                                 | European Commission - Joint Research Centre<br>Institute for Environment and Sustainability                                                                                                                                                                                                                                                                           |                                                                                                                                                                                                                                                                                                                                                                                                                                                                                                                   |                                                                                                                                                                                                                                                                                              |
| Website                                                                     | <a href="http://eusoils.jrc.ec.europa.eu/library/esdac/esdac.html">http://eusoils.jrc.ec.europa.eu/library/esdac/esdac.html</a>                                                                                                                                                                                                                                       |                                                                                                                                                                                                                                                                                                                                                                                                                                                                                                                   |                                                                                                                                                                                                                                                                                              |
| Funding                                                                     |                                                                                                                                                                                                                                                                                                                                                                       |                                                                                                                                                                                                                                                                                                                                                                                                                                                                                                                   |                                                                                                                                                                                                                                                                                              |
| Conflict of interest                                                        | -                                                                                                                                                                                                                                                                                                                                                                     |                                                                                                                                                                                                                                                                                                                                                                                                                                                                                                                   |                                                                                                                                                                                                                                                                                              |
| Part of other network(s)                                                    | -                                                                                                                                                                                                                                                                                                                                                                     |                                                                                                                                                                                                                                                                                                                                                                                                                                                                                                                   |                                                                                                                                                                                                                                                                                              |
| Grouping other network(s)                                                   | Collects data from ESNB (European Soil Bureau Network), JRC, Member States, EU funded soil related projects and others                                                                                                                                                                                                                                                |                                                                                                                                                                                                                                                                                                                                                                                                                                                                                                                   |                                                                                                                                                                                                                                                                                              |
| <b>MONITORING SUBJECT</b>                                                   |                                                                                                                                                                                                                                                                                                                                                                       |                                                                                                                                                                                                                                                                                                                                                                                                                                                                                                                   |                                                                                                                                                                                                                                                                                              |
| Description                                                                 | Data collection on soil related aspects.<br>Information on soil profiles, organic carbon content, hydraulic properties, erosion, heavy metals, pollution, acidification, PH, chemical, physical and biological soil properties.                                                                                                                                       |                                                                                                                                                                                                                                                                                                                                                                                                                                                                                                                   |                                                                                                                                                                                                                                                                                              |
| Protection goal(s) and/or Influencing factor (s)                            | <input type="checkbox"/> Protection goal<br><br><input type="checkbox"/> Biodiversity:<br><input type="checkbox"/> Human Health<br><input type="checkbox"/> Animal Health<br><input type="checkbox"/> Plant Health<br><input checked="" type="checkbox"/> Soil function<br><input type="checkbox"/> Water quality<br><input type="checkbox"/> Sustainable Agriculture | <input type="checkbox"/> Influencing factor<br><br><input type="checkbox"/> Agronomic practice<br><input type="checkbox"/> Plant protection<br><input type="checkbox"/> GMO cultivation<br><input type="checkbox"/> Environmental conditions                                                                                                                                                                                                                                                                      |                                                                                                                                                                                                                                                                                              |
| Duplication of Farmer's questionnaire                                       | <input checked="" type="checkbox"/> No duplication<br><input checked="" type="checkbox"/> Partly duplication<br><input type="checkbox"/> Complete duplication                                                                                                                                                                                                         |                                                                                                                                                                                                                                                                                                                                                                                                                                                                                                                   |                                                                                                                                                                                                                                                                                              |
| <b>SPECIFICITY</b>                                                          |                                                                                                                                                                                                                                                                                                                                                                       |                                                                                                                                                                                                                                                                                                                                                                                                                                                                                                                   |                                                                                                                                                                                                                                                                                              |
| Geography                                                                   | <input checked="" type="checkbox"/> EU -wide<br><br><input type="checkbox"/> Zone A – North<br><input type="checkbox"/> Zone B – Centre<br><input type="checkbox"/> Zone C – South                                                                                                                                                                                    |                                                                                                                                                                                                                                                                                                                                                                                                                                                                                                                   |                                                                                                                                                                                                                                                                                              |
|                                                                             | <input type="checkbox"/> Denmark,<br><input type="checkbox"/> Estonia,<br><input type="checkbox"/> Latvia,<br><input type="checkbox"/> Lithuania,<br><input type="checkbox"/> Finland,<br><input type="checkbox"/> Sweden                                                                                                                                             | <input type="checkbox"/> Belgium,<br><input type="checkbox"/> Czech Republic<br><input type="checkbox"/> Germany,<br><input type="checkbox"/> Ireland,<br><input type="checkbox"/> Luxembourg,<br><input type="checkbox"/> Hungary,<br><input type="checkbox"/> Netherlands,<br><input type="checkbox"/> Austria,<br><input type="checkbox"/> Poland,<br><input type="checkbox"/> Romania,<br><input type="checkbox"/> Slovenia,<br><input type="checkbox"/> Slovakia,<br><input type="checkbox"/> United Kingdom | <input type="checkbox"/> Bulgaria,<br><input type="checkbox"/> Greece,<br><input type="checkbox"/> Spain,<br><input type="checkbox"/> France,<br><input type="checkbox"/> Italy,<br><input type="checkbox"/> Cyprus,<br><input type="checkbox"/> Malta,<br><input type="checkbox"/> Portugal |
|                                                                             | <input type="checkbox"/> Regional (specify)<br><input type="checkbox"/> Local (specify)                                                                                                                                                                                                                                                                               |                                                                                                                                                                                                                                                                                                                                                                                                                                                                                                                   |                                                                                                                                                                                                                                                                                              |
| Factors                                                                     | <input checked="" type="checkbox"/> Multiple species/items (specify): water quality: rivers, lakes, groundwater, coastal and marine<br><input type="checkbox"/> Single species/item (specify)                                                                                                                                                                         |                                                                                                                                                                                                                                                                                                                                                                                                                                                                                                                   |                                                                                                                                                                                                                                                                                              |
| Crop                                                                        | <input checked="" type="checkbox"/> No specific crop(s)<br><input type="checkbox"/> Several crops (e.g. all cereals)<br><input type="checkbox"/> Single crop                                                                                                                                                                                                          |                                                                                                                                                                                                                                                                                                                                                                                                                                                                                                                   |                                                                                                                                                                                                                                                                                              |
| Trait /treatment                                                            | <input checked="" type="checkbox"/> No specific traits/treatments<br><input type="checkbox"/> Several traits/treatments<br><input type="checkbox"/> Single trait/treatment                                                                                                                                                                                            |                                                                                                                                                                                                                                                                                                                                                                                                                                                                                                                   |                                                                                                                                                                                                                                                                                              |
| GMO                                                                         | <input checked="" type="checkbox"/> No GMO bias<br><input type="checkbox"/> GMO specific                                                                                                                                                                                                                                                                              |                                                                                                                                                                                                                                                                                                                                                                                                                                                                                                                   |                                                                                                                                                                                                                                                                                              |
| <b>METHODOLOGY</b>                                                          |                                                                                                                                                                                                                                                                                                                                                                       |                                                                                                                                                                                                                                                                                                                                                                                                                                                                                                                   |                                                                                                                                                                                                                                                                                              |



|                                                                                                                                                                                                                                                                           |                                                                                                                                                                                                                                                                        |
|---------------------------------------------------------------------------------------------------------------------------------------------------------------------------------------------------------------------------------------------------------------------------|------------------------------------------------------------------------------------------------------------------------------------------------------------------------------------------------------------------------------------------------------------------------|
| Observations                                                                                                                                                                                                                                                              | <input type="checkbox"/> Reported, verifiable methodology<br><input type="checkbox"/> Reported, unverifiable methodology<br><input type="checkbox"/> Unknown, unverifiable methodology                                                                                 |
| Frequency                                                                                                                                                                                                                                                                 | <input type="checkbox"/> > 1 time/year<br><input type="checkbox"/> 1 time/year<br><input type="checkbox"/> < 1 time/year                                                                                                                                               |
| Future                                                                                                                                                                                                                                                                    | <input checked="" type="checkbox"/> For ≥ 5 years<br><input type="checkbox"/> between 1 and 5 years<br><input type="checkbox"/> no prospect                                                                                                                            |
| Quality of performers                                                                                                                                                                                                                                                     | <input type="checkbox"/> Trained, professionals<br><input type="checkbox"/> Trained, non-professionals – training by documentation, volunteers<br><input type="checkbox"/> Uncertain or not -specified                                                                 |
| Quality of data                                                                                                                                                                                                                                                           | <input type="checkbox"/> Standard recording of raw data<br><input type="checkbox"/> Free recording of raw data<br><input type="checkbox"/> Anecdotic                                                                                                                   |
| Analysis                                                                                                                                                                                                                                                                  | <input type="checkbox"/> Reported, verifiable methodology<br><input type="checkbox"/> Reported, unverifiable methodology<br><input type="checkbox"/> Unknown, unverifiable methodology                                                                                 |
| Quality of analysis                                                                                                                                                                                                                                                       | <input type="checkbox"/> Scientifically based<br><input type="checkbox"/> Indicative only<br><input type="checkbox"/> Unknown                                                                                                                                          |
| <b>REPORTING</b>                                                                                                                                                                                                                                                          |                                                                                                                                                                                                                                                                        |
| Language                                                                                                                                                                                                                                                                  | Reporting language(s): English                                                                                                                                                                                                                                         |
| Availability                                                                                                                                                                                                                                                              | <input type="checkbox"/> Scientific publication<br><input checked="" type="checkbox"/> Official report available on the internet or in other public forum<br><input type="checkbox"/> Official report available from network<br><input type="checkbox"/> Not available |
| Frequency                                                                                                                                                                                                                                                                 | <input type="checkbox"/> ≥ 1 time/year – bulletins on several topics, country reports<br><input type="checkbox"/> < 1 time/year –                                                                                                                                      |
| Historical reference                                                                                                                                                                                                                                                      | <input checked="" type="checkbox"/> over ≥ 5 years<br><input type="checkbox"/> between 1 and 5 years<br><input type="checkbox"/> no historical analysis                                                                                                                |
| <b>COMMENT(S)</b>                                                                                                                                                                                                                                                         |                                                                                                                                                                                                                                                                        |
| The ESDAC IT facility hosts soil related products: datasets, documents, services and other types of information such as maps and graphs and provides web-based tools for the access to and the update of its contents. Some of the inventories are free other restricted. |                                                                                                                                                                                                                                                                        |

## GSEN-09-0201.00.1 EU – European Red List

| EuropaBio's coordinated approach to General Surveillance: Existing Networks |                                                                                                                                                                                                                                                                                                                                                                                                 |                                                                                                                                                                                                                                                                                                                                                                                                                                                                                                                   |                                                                                                                                                                                                                                                                                              |
|-----------------------------------------------------------------------------|-------------------------------------------------------------------------------------------------------------------------------------------------------------------------------------------------------------------------------------------------------------------------------------------------------------------------------------------------------------------------------------------------|-------------------------------------------------------------------------------------------------------------------------------------------------------------------------------------------------------------------------------------------------------------------------------------------------------------------------------------------------------------------------------------------------------------------------------------------------------------------------------------------------------------------|----------------------------------------------------------------------------------------------------------------------------------------------------------------------------------------------------------------------------------------------------------------------------------------------|
| ORGANISATION                                                                |                                                                                                                                                                                                                                                                                                                                                                                                 |                                                                                                                                                                                                                                                                                                                                                                                                                                                                                                                   |                                                                                                                                                                                                                                                                                              |
| EuropaBio reference                                                         | GS-EN-09-0201                                                                                                                                                                                                                                                                                                                                                                                   |                                                                                                                                                                                                                                                                                                                                                                                                                                                                                                                   |                                                                                                                                                                                                                                                                                              |
| Official name of the Network                                                | <b>European Red List</b><br>compiled by the World Conservation Union's (IUCN's) Species Programme, Species Survival Commission and Regional Office for Europe.                                                                                                                                                                                                                                  |                                                                                                                                                                                                                                                                                                                                                                                                                                                                                                                   |                                                                                                                                                                                                                                                                                              |
| Other names                                                                 |                                                                                                                                                                                                                                                                                                                                                                                                 |                                                                                                                                                                                                                                                                                                                                                                                                                                                                                                                   |                                                                                                                                                                                                                                                                                              |
| Type of organisation                                                        | Nature conservation                                                                                                                                                                                                                                                                                                                                                                             |                                                                                                                                                                                                                                                                                                                                                                                                                                                                                                                   |                                                                                                                                                                                                                                                                                              |
| Coordinates                                                                 | IUCN Red List Unit<br>IUCN UK Office,<br>219c Huntingdon Road<br>Cambridge CB3 0DL,<br><br>Fax: +44 (0)1223 277845<br>Email: <a href="mailto:redlist@iucn.org">redlist@iucn.org</a>                                                                                                                                                                                                             |                                                                                                                                                                                                                                                                                                                                                                                                                                                                                                                   |                                                                                                                                                                                                                                                                                              |
| Website                                                                     | <a href="http://ec.europa.eu/environment/nature/conservation/species/redlist/index_en.htm">http://ec.europa.eu/environment/nature/conservation/species/redlist/index_en.htm</a>                                                                                                                                                                                                                 |                                                                                                                                                                                                                                                                                                                                                                                                                                                                                                                   |                                                                                                                                                                                                                                                                                              |
| Funding                                                                     | donations by The Rufford Maurice Laing Foundation, Moore Family Foundation; the Gordon and Betty Moore Foundation; the Critical Ecosystem Partnership Fund; the European Commission; the Esmée Fairburn Foundation; the French Ministry for Foreign Affairs; and the MAVA Foundation for Nature Conservation, and others.                                                                       |                                                                                                                                                                                                                                                                                                                                                                                                                                                                                                                   |                                                                                                                                                                                                                                                                                              |
| Conflict of interest                                                        | -                                                                                                                                                                                                                                                                                                                                                                                               |                                                                                                                                                                                                                                                                                                                                                                                                                                                                                                                   |                                                                                                                                                                                                                                                                                              |
| Part of other network(s)                                                    |                                                                                                                                                                                                                                                                                                                                                                                                 |                                                                                                                                                                                                                                                                                                                                                                                                                                                                                                                   |                                                                                                                                                                                                                                                                                              |
| Grouping other network(s)                                                   |                                                                                                                                                                                                                                                                                                                                                                                                 |                                                                                                                                                                                                                                                                                                                                                                                                                                                                                                                   |                                                                                                                                                                                                                                                                                              |
| MONITORING SUBJECT                                                          |                                                                                                                                                                                                                                                                                                                                                                                                 |                                                                                                                                                                                                                                                                                                                                                                                                                                                                                                                   |                                                                                                                                                                                                                                                                                              |
| Description                                                                 | identifies those species that are threatened with extinction at the European level – so that appropriate conservation action can be taken to improve their status.<br>Review of the conservation status of ca. 6,000 European species.                                                                                                                                                          |                                                                                                                                                                                                                                                                                                                                                                                                                                                                                                                   |                                                                                                                                                                                                                                                                                              |
| Protection goal(s) and/or influencing factor(s)                             | <input checked="" type="checkbox"/> Protection goal<br><input checked="" type="checkbox"/> Biodiversity: endangered species<br><input type="checkbox"/> Human Health<br><input type="checkbox"/> Animal Health<br><input type="checkbox"/> Plant Health<br><input type="checkbox"/> Soil function<br><input type="checkbox"/> Water quality<br><input type="checkbox"/> Sustainable Agriculture | <input type="checkbox"/> Influencing factor<br><input type="checkbox"/> Agronomic practice<br><input type="checkbox"/> Plant protection<br><input type="checkbox"/> GMO cultivation<br><input type="checkbox"/> Environmental conditions                                                                                                                                                                                                                                                                          |                                                                                                                                                                                                                                                                                              |
| Duplication of Farmer's questionnaire                                       | <input checked="" type="checkbox"/> No duplication<br><input type="checkbox"/> Partly duplication<br><input type="checkbox"/> Complete duplication                                                                                                                                                                                                                                              |                                                                                                                                                                                                                                                                                                                                                                                                                                                                                                                   |                                                                                                                                                                                                                                                                                              |
| SPECIFICITY                                                                 |                                                                                                                                                                                                                                                                                                                                                                                                 |                                                                                                                                                                                                                                                                                                                                                                                                                                                                                                                   |                                                                                                                                                                                                                                                                                              |
| Geography                                                                   | <input checked="" type="checkbox"/> EU -wide<br><input type="checkbox"/> Zone A – North<br><input type="checkbox"/> Zone B – Centre:<br><input type="checkbox"/> Zone C – South                                                                                                                                                                                                                 |                                                                                                                                                                                                                                                                                                                                                                                                                                                                                                                   |                                                                                                                                                                                                                                                                                              |
|                                                                             | <input type="checkbox"/> Denmark,<br><input type="checkbox"/> Estonia,<br><input type="checkbox"/> Latvia,<br><input type="checkbox"/> Lithuania,<br><input type="checkbox"/> Finland,<br><input type="checkbox"/> Sweden                                                                                                                                                                       | <input type="checkbox"/> Belgium,<br><input type="checkbox"/> Czech Republic<br><input type="checkbox"/> Germany,<br><input type="checkbox"/> Ireland,<br><input type="checkbox"/> Luxembourg,<br><input type="checkbox"/> Hungary,<br><input type="checkbox"/> Netherlands,<br><input type="checkbox"/> Austria,<br><input type="checkbox"/> Poland,<br><input type="checkbox"/> Romania,<br><input type="checkbox"/> Slovenia,<br><input type="checkbox"/> Slovakia,<br><input type="checkbox"/> United Kingdom | <input type="checkbox"/> Bulgaria,<br><input type="checkbox"/> Greece,<br><input type="checkbox"/> Spain,<br><input type="checkbox"/> France,<br><input type="checkbox"/> Italy,<br><input type="checkbox"/> Cyprus,<br><input type="checkbox"/> Malta,<br><input type="checkbox"/> Portugal |
|                                                                             | <input type="checkbox"/> Regional (specify)<br><input type="checkbox"/> Local (specify)                                                                                                                                                                                                                                                                                                         |                                                                                                                                                                                                                                                                                                                                                                                                                                                                                                                   |                                                                                                                                                                                                                                                                                              |
| Factors                                                                     | <input checked="" type="checkbox"/> Multiple species/items (specify): mammals, reptiles, amphibians, freshwater fishes, butterflies, dragonflies, and selected groups of beetles, molluscs, and vascular plants<br><input type="checkbox"/> Single species/item (specify)                                                                                                                       |                                                                                                                                                                                                                                                                                                                                                                                                                                                                                                                   |                                                                                                                                                                                                                                                                                              |
| Crop                                                                        | <input checked="" type="checkbox"/> No specific crop(s)<br><input type="checkbox"/> Several crops (e.g. all cereals)<br><input type="checkbox"/> Single crop                                                                                                                                                                                                                                    |                                                                                                                                                                                                                                                                                                                                                                                                                                                                                                                   |                                                                                                                                                                                                                                                                                              |

|                                                                                                                                                              |                                                                                                                                                                                                                                                                        |
|--------------------------------------------------------------------------------------------------------------------------------------------------------------|------------------------------------------------------------------------------------------------------------------------------------------------------------------------------------------------------------------------------------------------------------------------|
| Trait /treatment                                                                                                                                             | <input checked="" type="checkbox"/> No specific traits/treatments<br><input type="checkbox"/> Several traits/treatments<br><input type="checkbox"/> Single trait/treatment                                                                                             |
| GMO                                                                                                                                                          | <input checked="" type="checkbox"/> No GMO bias<br><input type="checkbox"/> GMO specific                                                                                                                                                                               |
| <b>METHODOLOGY</b>                                                                                                                                           |                                                                                                                                                                                                                                                                        |
| Observations                                                                                                                                                 | <input checked="" type="checkbox"/> Reported, verifiable methodology<br><input type="checkbox"/> Reported, unverifiable methodology<br><input type="checkbox"/> Unknown, unverifiable methodology                                                                      |
| Frequency                                                                                                                                                    | <input type="checkbox"/> > 1 time/year<br><input checked="" type="checkbox"/> 1 time/year<br><input type="checkbox"/> < 1 time/year                                                                                                                                    |
| Future                                                                                                                                                       | <input checked="" type="checkbox"/> For $\geq 5$ years<br><input type="checkbox"/> between 1 and 5 years<br><input type="checkbox"/> no prospect                                                                                                                       |
| Quality of performers                                                                                                                                        | <input checked="" type="checkbox"/> Trained, professionals<br><input type="checkbox"/> Trained, non-professionals – training by documentation, volunteers<br><input type="checkbox"/> Uncertain or not -specified                                                      |
| Quality of data                                                                                                                                              | <input checked="" type="checkbox"/> Standard recording of raw data<br><input type="checkbox"/> Free recording of raw data<br><input type="checkbox"/> Anecdotic                                                                                                        |
| Analysis                                                                                                                                                     | <input checked="" type="checkbox"/> Reported, verifiable methodology<br><input type="checkbox"/> Reported, unverifiable methodology<br><input type="checkbox"/> Unknown, unverifiable methodology                                                                      |
| Quality of analysis                                                                                                                                          | <input checked="" type="checkbox"/> Scientifically based<br><input type="checkbox"/> Indicative only<br><input type="checkbox"/> Unknown                                                                                                                               |
| <b>REPORTING</b>                                                                                                                                             |                                                                                                                                                                                                                                                                        |
| Language                                                                                                                                                     | Reporting language(s): English                                                                                                                                                                                                                                         |
| Availability                                                                                                                                                 | <input type="checkbox"/> Scientific publication<br><input checked="" type="checkbox"/> Official report available on the internet or in other public forum<br><input type="checkbox"/> Official report available from network<br><input type="checkbox"/> Not available |
| Frequency                                                                                                                                                    | <input checked="" type="checkbox"/> $\geq 1$ time/year –<br><input checked="" type="checkbox"/> < 1 time/year –                                                                                                                                                        |
| Historical reference                                                                                                                                         | <input checked="" type="checkbox"/> over $\geq 5$ years<br><input type="checkbox"/> between 1 and 5 years<br><input type="checkbox"/> no historical analysis                                                                                                           |
| <b>COMMENT(S)</b>                                                                                                                                            |                                                                                                                                                                                                                                                                        |
| Pan-European database with information on status and trends in population sizes, and threats for threatened and endangered species. Strong scientific basis. |                                                                                                                                                                                                                                                                        |

## GSEN-09-0229.00.1 EU – European Soil Bureau Network

| EuropaBio's coordinated approach to General Surveillance: Existing Networks |                                                                                                                                                                                                                                                                                                                                                                                                                                                                                                                                                                                                                                                                                                     |                                                                                                                                                                                                                                                                                                                                                                                                                                                                                                                                                                                                                      |                                                                                                                                                                                                                                                                                                                                                     |
|-----------------------------------------------------------------------------|-----------------------------------------------------------------------------------------------------------------------------------------------------------------------------------------------------------------------------------------------------------------------------------------------------------------------------------------------------------------------------------------------------------------------------------------------------------------------------------------------------------------------------------------------------------------------------------------------------------------------------------------------------------------------------------------------------|----------------------------------------------------------------------------------------------------------------------------------------------------------------------------------------------------------------------------------------------------------------------------------------------------------------------------------------------------------------------------------------------------------------------------------------------------------------------------------------------------------------------------------------------------------------------------------------------------------------------|-----------------------------------------------------------------------------------------------------------------------------------------------------------------------------------------------------------------------------------------------------------------------------------------------------------------------------------------------------|
| ORGANISATION                                                                |                                                                                                                                                                                                                                                                                                                                                                                                                                                                                                                                                                                                                                                                                                     |                                                                                                                                                                                                                                                                                                                                                                                                                                                                                                                                                                                                                      |                                                                                                                                                                                                                                                                                                                                                     |
| EuropaBio reference                                                         | GS-EN-09-0229                                                                                                                                                                                                                                                                                                                                                                                                                                                                                                                                                                                                                                                                                       |                                                                                                                                                                                                                                                                                                                                                                                                                                                                                                                                                                                                                      |                                                                                                                                                                                                                                                                                                                                                     |
| Official name of the Network                                                | <b>European Soil Bureau Network</b>                                                                                                                                                                                                                                                                                                                                                                                                                                                                                                                                                                                                                                                                 |                                                                                                                                                                                                                                                                                                                                                                                                                                                                                                                                                                                                                      |                                                                                                                                                                                                                                                                                                                                                     |
| Other names                                                                 | ESBN                                                                                                                                                                                                                                                                                                                                                                                                                                                                                                                                                                                                                                                                                                |                                                                                                                                                                                                                                                                                                                                                                                                                                                                                                                                                                                                                      |                                                                                                                                                                                                                                                                                                                                                     |
| Type of organisation                                                        | Governmental<br>Founded 1996                                                                                                                                                                                                                                                                                                                                                                                                                                                                                                                                                                                                                                                                        |                                                                                                                                                                                                                                                                                                                                                                                                                                                                                                                                                                                                                      |                                                                                                                                                                                                                                                                                                                                                     |
| Coordinates                                                                 | European Commission - Joint Research Centre<br>Institute for Environment and Sustainability                                                                                                                                                                                                                                                                                                                                                                                                                                                                                                                                                                                                         |                                                                                                                                                                                                                                                                                                                                                                                                                                                                                                                                                                                                                      |                                                                                                                                                                                                                                                                                                                                                     |
| Website                                                                     | <a href="http://eusoiils.jrc.ec.europa.eu/esbn/Esb_n_overview.html">http://eusoiils.jrc.ec.europa.eu/esbn/Esb_n_overview.html</a>                                                                                                                                                                                                                                                                                                                                                                                                                                                                                                                                                                   |                                                                                                                                                                                                                                                                                                                                                                                                                                                                                                                                                                                                                      |                                                                                                                                                                                                                                                                                                                                                     |
| Funding                                                                     | EU<br>SPADE 2 also sponsored by the European Crop Protection Association (ECPA)                                                                                                                                                                                                                                                                                                                                                                                                                                                                                                                                                                                                                     |                                                                                                                                                                                                                                                                                                                                                                                                                                                                                                                                                                                                                      |                                                                                                                                                                                                                                                                                                                                                     |
| Conflict of interest                                                        | -                                                                                                                                                                                                                                                                                                                                                                                                                                                                                                                                                                                                                                                                                                   |                                                                                                                                                                                                                                                                                                                                                                                                                                                                                                                                                                                                                      |                                                                                                                                                                                                                                                                                                                                                     |
| Part of other network(s)                                                    |                                                                                                                                                                                                                                                                                                                                                                                                                                                                                                                                                                                                                                                                                                     |                                                                                                                                                                                                                                                                                                                                                                                                                                                                                                                                                                                                                      |                                                                                                                                                                                                                                                                                                                                                     |
| Grouping other network(s)                                                   | Grouping country's Centres of Excellence                                                                                                                                                                                                                                                                                                                                                                                                                                                                                                                                                                                                                                                            |                                                                                                                                                                                                                                                                                                                                                                                                                                                                                                                                                                                                                      |                                                                                                                                                                                                                                                                                                                                                     |
| MONITORING SUBJECT                                                          |                                                                                                                                                                                                                                                                                                                                                                                                                                                                                                                                                                                                                                                                                                     |                                                                                                                                                                                                                                                                                                                                                                                                                                                                                                                                                                                                                      |                                                                                                                                                                                                                                                                                                                                                     |
| Description                                                                 | <p>The role the ESBN Project at the JRC is twofold - to perform a co-ordination activity by hosting the Secretariat of the ESBN and to provide a central source for information relevant to the work of the European Commission.</p> <p>Soil Profile Analytical Database was compiled in 1993-94. Database SPADE 1 contains soil profile characterisations with physical and chemical analyses. SPADE 2, a revised version, contains estimated profile data for the dominant and sub-dominant land uses for the country soil mapping units (SMUs). The overall objective was to provide sufficient soil property data to support higher tier modelling of pesticide fate at the European level.</p> |                                                                                                                                                                                                                                                                                                                                                                                                                                                                                                                                                                                                                      |                                                                                                                                                                                                                                                                                                                                                     |
| Protection goal(s) and/or influencing factor(s)                             | <input checked="" type="checkbox"/> Protection goal<br><br><input type="checkbox"/> Biodiversity<br><input type="checkbox"/> Human Health<br><input type="checkbox"/> Animal Health<br><input type="checkbox"/> Plant Health<br><input checked="" type="checkbox"/> Soil function<br><input type="checkbox"/> Water quality<br><input checked="" type="checkbox"/> Sustainable Agriculture                                                                                                                                                                                                                                                                                                          | <input checked="" type="checkbox"/> Influencing factor<br><br><input checked="" type="checkbox"/> Agronomic practice<br><input type="checkbox"/> Plant protection<br><input type="checkbox"/> GMO cultivation<br><input checked="" type="checkbox"/> Environmental conditions                                                                                                                                                                                                                                                                                                                                        |                                                                                                                                                                                                                                                                                                                                                     |
| Duplication of Farmer's questionnaire                                       | <input checked="" type="checkbox"/> No duplication<br><input type="checkbox"/> Partly duplication<br><input type="checkbox"/> Complete duplication                                                                                                                                                                                                                                                                                                                                                                                                                                                                                                                                                  |                                                                                                                                                                                                                                                                                                                                                                                                                                                                                                                                                                                                                      |                                                                                                                                                                                                                                                                                                                                                     |
| SPECIFICITY                                                                 |                                                                                                                                                                                                                                                                                                                                                                                                                                                                                                                                                                                                                                                                                                     |                                                                                                                                                                                                                                                                                                                                                                                                                                                                                                                                                                                                                      |                                                                                                                                                                                                                                                                                                                                                     |
| Geography                                                                   | <input checked="" type="checkbox"/> EU -wide<br><br><input type="checkbox"/> Zone A – North<br><input type="checkbox"/> Zone B – Centre:<br><input type="checkbox"/> Zone C – South                                                                                                                                                                                                                                                                                                                                                                                                                                                                                                                 |                                                                                                                                                                                                                                                                                                                                                                                                                                                                                                                                                                                                                      |                                                                                                                                                                                                                                                                                                                                                     |
|                                                                             | <input checked="" type="checkbox"/> Denmark,<br><input checked="" type="checkbox"/> Estonia,<br><input type="checkbox"/> Latvia,<br><input type="checkbox"/> Lithuania,<br><input checked="" type="checkbox"/> Finland,<br><input type="checkbox"/> Sweden                                                                                                                                                                                                                                                                                                                                                                                                                                          | <input checked="" type="checkbox"/> Belgium,<br><input type="checkbox"/> Czech Republic<br><input checked="" type="checkbox"/> Germany,<br><input checked="" type="checkbox"/> Ireland,<br><input checked="" type="checkbox"/> Luxembourg,<br><input checked="" type="checkbox"/> Hungary,<br><input checked="" type="checkbox"/> Netherlands,<br><input type="checkbox"/> Austria,<br><input type="checkbox"/> Poland,<br><input checked="" type="checkbox"/> Romania,<br><input type="checkbox"/> Slovenia,<br><input checked="" type="checkbox"/> Slovakia,<br><input checked="" type="checkbox"/> United Kingdom | <input checked="" type="checkbox"/> Bulgaria,<br><input type="checkbox"/> Greece,<br><input checked="" type="checkbox"/> Spain,<br><input checked="" type="checkbox"/> France,<br><input checked="" type="checkbox"/> Italy,<br><input type="checkbox"/> Cyprus,<br><input type="checkbox"/> Malta,<br><input checked="" type="checkbox"/> Portugal |
|                                                                             | <input type="checkbox"/> Regional (specify)<br><input type="checkbox"/> Local (specify)                                                                                                                                                                                                                                                                                                                                                                                                                                                                                                                                                                                                             |                                                                                                                                                                                                                                                                                                                                                                                                                                                                                                                                                                                                                      |                                                                                                                                                                                                                                                                                                                                                     |
| Factors                                                                     | <input type="checkbox"/> Multiple species/items (specify):<br><input checked="" type="checkbox"/> Single species/item (specify): soil                                                                                                                                                                                                                                                                                                                                                                                                                                                                                                                                                               |                                                                                                                                                                                                                                                                                                                                                                                                                                                                                                                                                                                                                      |                                                                                                                                                                                                                                                                                                                                                     |
| Crop                                                                        | <input checked="" type="checkbox"/> No specific crop(s)<br><input type="checkbox"/> Several crops (e.g. all cereals)<br><input type="checkbox"/> Single crop                                                                                                                                                                                                                                                                                                                                                                                                                                                                                                                                        |                                                                                                                                                                                                                                                                                                                                                                                                                                                                                                                                                                                                                      |                                                                                                                                                                                                                                                                                                                                                     |
| Trait /treatment                                                            | <input checked="" type="checkbox"/> No specific traits/treatments<br><input type="checkbox"/> Several traits/treatments<br><input type="checkbox"/> Single trait/treatment                                                                                                                                                                                                                                                                                                                                                                                                                                                                                                                          |                                                                                                                                                                                                                                                                                                                                                                                                                                                                                                                                                                                                                      |                                                                                                                                                                                                                                                                                                                                                     |

|                                                                                   |                                                                                                                                                                                                                                                                        |
|-----------------------------------------------------------------------------------|------------------------------------------------------------------------------------------------------------------------------------------------------------------------------------------------------------------------------------------------------------------------|
| GMO                                                                               | <input checked="" type="checkbox"/> No GMO bias<br><input type="checkbox"/> GMO specific                                                                                                                                                                               |
| <b>METHODOLOGY</b>                                                                |                                                                                                                                                                                                                                                                        |
| Observations                                                                      | <input checked="" type="checkbox"/> Reported, verifiable methodology<br><input type="checkbox"/> Reported, unverifiable methodology<br><input type="checkbox"/> Unknown, unverifiable methodology                                                                      |
| Frequency                                                                         | <input type="checkbox"/> > 1 time/year<br><input type="checkbox"/> 1 time/year<br><input checked="" type="checkbox"/> < 1 time/year                                                                                                                                    |
| Future                                                                            | <input checked="" type="checkbox"/> For ≥ 5 years<br><input type="checkbox"/> between 1 and 5 years<br><input type="checkbox"/> no prospect                                                                                                                            |
| Quality of performers                                                             | <input checked="" type="checkbox"/> Trained, professionals<br><input type="checkbox"/> Trained, non-professionals – training by documentation, volunteers<br><input type="checkbox"/> Uncertain or not -specified                                                      |
| Quality of data                                                                   | <input type="checkbox"/> Standard recording of raw data<br><input type="checkbox"/> Free recording of raw data<br><input type="checkbox"/> Anecdotic                                                                                                                   |
| Analysis                                                                          | <input checked="" type="checkbox"/> Reported, verifiable methodology<br><input type="checkbox"/> Reported, unverifiable methodology<br><input type="checkbox"/> Unknown, unverifiable methodology                                                                      |
| Quality of analysis                                                               | <input checked="" type="checkbox"/> Scientifically based<br><input type="checkbox"/> Indicative only<br><input type="checkbox"/> Unknown                                                                                                                               |
| <b>REPORTING</b>                                                                  |                                                                                                                                                                                                                                                                        |
| Language                                                                          | Reporting language(s): English                                                                                                                                                                                                                                         |
| Availability                                                                      | <input checked="" type="checkbox"/> Scientific publication<br><input type="checkbox"/> Official report available on the internet or in other public forum<br><input type="checkbox"/> Official report available from network<br><input type="checkbox"/> Not available |
| Frequency                                                                         | <input type="checkbox"/> ≥ 1 time/year<br><input checked="" type="checkbox"/> < 1 time/year                                                                                                                                                                            |
| Historical reference                                                              | <input checked="" type="checkbox"/> over ≥ 5 years<br><input type="checkbox"/> between 1 and 5 years<br><input type="checkbox"/> no historical analysis                                                                                                                |
| <b>COMMENT(S)</b>                                                                 |                                                                                                                                                                                                                                                                        |
| Historical data (last 2 decades) from almost all EU Member States are harmonised. |                                                                                                                                                                                                                                                                        |

## GSEN-09-0230.00.1 EU – ENVASSO

| EuropaBio's coordinated approach to General Surveillance: Existing Networks |                                                                                                                                                                                                                                                                                                                                                                                        |                                                                                                                                                                                                                                                                                                                                                                                                                                                                                                                                                                                                                                                       |                                                                                                                                                                                                                                                                                                                                                                           |
|-----------------------------------------------------------------------------|----------------------------------------------------------------------------------------------------------------------------------------------------------------------------------------------------------------------------------------------------------------------------------------------------------------------------------------------------------------------------------------|-------------------------------------------------------------------------------------------------------------------------------------------------------------------------------------------------------------------------------------------------------------------------------------------------------------------------------------------------------------------------------------------------------------------------------------------------------------------------------------------------------------------------------------------------------------------------------------------------------------------------------------------------------|---------------------------------------------------------------------------------------------------------------------------------------------------------------------------------------------------------------------------------------------------------------------------------------------------------------------------------------------------------------------------|
| <b>ORGANISATION</b>                                                         |                                                                                                                                                                                                                                                                                                                                                                                        |                                                                                                                                                                                                                                                                                                                                                                                                                                                                                                                                                                                                                                                       |                                                                                                                                                                                                                                                                                                                                                                           |
| EuropaBio reference                                                         | GS-EN-09-0230                                                                                                                                                                                                                                                                                                                                                                          |                                                                                                                                                                                                                                                                                                                                                                                                                                                                                                                                                                                                                                                       |                                                                                                                                                                                                                                                                                                                                                                           |
| Official name of the Network                                                | <b>ENVIRONMENTAL ASSESSMENT OF SOIL FOR MONITORING</b>                                                                                                                                                                                                                                                                                                                                 |                                                                                                                                                                                                                                                                                                                                                                                                                                                                                                                                                                                                                                                       |                                                                                                                                                                                                                                                                                                                                                                           |
| Other names                                                                 | <b>ENVASSO final report</b>                                                                                                                                                                                                                                                                                                                                                            |                                                                                                                                                                                                                                                                                                                                                                                                                                                                                                                                                                                                                                                       |                                                                                                                                                                                                                                                                                                                                                                           |
| Type of organisation                                                        | Academic                                                                                                                                                                                                                                                                                                                                                                               |                                                                                                                                                                                                                                                                                                                                                                                                                                                                                                                                                                                                                                                       |                                                                                                                                                                                                                                                                                                                                                                           |
| Coordinates                                                                 | CRANFIELD UNIVERSITY<br>NATIONAL SOIL RESOURCES INSTITUTE<br>Cranfield<br><br>Fax: +44-01234-752970<br>Email: <a href="#">Contact</a>                                                                                                                                                                                                                                                  |                                                                                                                                                                                                                                                                                                                                                                                                                                                                                                                                                                                                                                                       |                                                                                                                                                                                                                                                                                                                                                                           |
| Website                                                                     | <a href="http://eussoils.jrc.ec.europa.eu/projects/envasso/">http://eussoils.jrc.ec.europa.eu/projects/envasso/</a> (final report)                                                                                                                                                                                                                                                     |                                                                                                                                                                                                                                                                                                                                                                                                                                                                                                                                                                                                                                                       |                                                                                                                                                                                                                                                                                                                                                                           |
| Funding                                                                     | EU, Project under European Commission 6 <sup>th</sup> Framework Programme (Contract 022713, 2006-8).                                                                                                                                                                                                                                                                                   |                                                                                                                                                                                                                                                                                                                                                                                                                                                                                                                                                                                                                                                       |                                                                                                                                                                                                                                                                                                                                                                           |
| Conflict of interest                                                        | -                                                                                                                                                                                                                                                                                                                                                                                      |                                                                                                                                                                                                                                                                                                                                                                                                                                                                                                                                                                                                                                                       |                                                                                                                                                                                                                                                                                                                                                                           |
| Part of other network(s)                                                    |                                                                                                                                                                                                                                                                                                                                                                                        |                                                                                                                                                                                                                                                                                                                                                                                                                                                                                                                                                                                                                                                       |                                                                                                                                                                                                                                                                                                                                                                           |
| Grouping other network(s)                                                   | comprises 37 partners drawn from 25 EU Member States                                                                                                                                                                                                                                                                                                                                   |                                                                                                                                                                                                                                                                                                                                                                                                                                                                                                                                                                                                                                                       |                                                                                                                                                                                                                                                                                                                                                                           |
| <b>MONITORING SUBJECT</b>                                                   |                                                                                                                                                                                                                                                                                                                                                                                        |                                                                                                                                                                                                                                                                                                                                                                                                                                                                                                                                                                                                                                                       |                                                                                                                                                                                                                                                                                                                                                                           |
| Description                                                                 | The project's main objective was to define and document a soil monitoring system for implementation in support of a Soil Framework Directive, aimed at protecting soil in the EU. Harmonisation of current and future soil monitoring activities in EU Member States.                                                                                                                  |                                                                                                                                                                                                                                                                                                                                                                                                                                                                                                                                                                                                                                                       |                                                                                                                                                                                                                                                                                                                                                                           |
| Protection goal(s) and/or influencing factor(s)                             | <input checked="" type="checkbox"/> Protection goal<br><input type="checkbox"/> Biodiversity<br><input type="checkbox"/> Human Health<br><input type="checkbox"/> Animal Health<br><input type="checkbox"/> Plant Health<br><input checked="" type="checkbox"/> Soil function<br><input type="checkbox"/> Water quality<br><input checked="" type="checkbox"/> Sustainable Agriculture | <input checked="" type="checkbox"/> Influencing factor<br><input checked="" type="checkbox"/> Agronomic practice<br><input type="checkbox"/> Plant protection<br><input type="checkbox"/> GMO cultivation<br><input checked="" type="checkbox"/> Environmental conditions                                                                                                                                                                                                                                                                                                                                                                             |                                                                                                                                                                                                                                                                                                                                                                           |
| Duplication of Farmer's questionnaire                                       | <input checked="" type="checkbox"/> No duplication<br><input type="checkbox"/> Partly duplication<br><input type="checkbox"/> Complete duplication                                                                                                                                                                                                                                     |                                                                                                                                                                                                                                                                                                                                                                                                                                                                                                                                                                                                                                                       |                                                                                                                                                                                                                                                                                                                                                                           |
| <b>SPECIFICITY</b>                                                          |                                                                                                                                                                                                                                                                                                                                                                                        |                                                                                                                                                                                                                                                                                                                                                                                                                                                                                                                                                                                                                                                       |                                                                                                                                                                                                                                                                                                                                                                           |
| Geography                                                                   | <input checked="" type="checkbox"/> EU -wide<br><input type="checkbox"/> Zone A – North<br><input type="checkbox"/> Zone B – Centre:<br><input type="checkbox"/> Zone C – South                                                                                                                                                                                                        |                                                                                                                                                                                                                                                                                                                                                                                                                                                                                                                                                                                                                                                       |                                                                                                                                                                                                                                                                                                                                                                           |
|                                                                             | <input checked="" type="checkbox"/> Denmark,<br><input checked="" type="checkbox"/> Estonia,<br><input checked="" type="checkbox"/> Latvia,<br><input checked="" type="checkbox"/> Lithuania,<br><input checked="" type="checkbox"/> Finland,<br><input checked="" type="checkbox"/> Sweden                                                                                            | <input checked="" type="checkbox"/> Belgium,<br><input checked="" type="checkbox"/> Czech Republic<br><input checked="" type="checkbox"/> Germany,<br><input checked="" type="checkbox"/> Ireland,<br><input type="checkbox"/> Luxembourg,<br><input checked="" type="checkbox"/> Hungary,<br><input checked="" type="checkbox"/> Netherlands,<br><input checked="" type="checkbox"/> Austria,<br><input checked="" type="checkbox"/> Poland,<br><input checked="" type="checkbox"/> Romania,<br><input checked="" type="checkbox"/> Slovenia,<br><input checked="" type="checkbox"/> Slovakia,<br><input checked="" type="checkbox"/> United Kingdom | <input checked="" type="checkbox"/> Bulgaria,<br><input checked="" type="checkbox"/> Greece,<br><input checked="" type="checkbox"/> Spain,<br><input checked="" type="checkbox"/> France,<br><input checked="" type="checkbox"/> Italy,<br><input type="checkbox"/> Cyprus,<br><input checked="" type="checkbox"/> Malta,<br><input checked="" type="checkbox"/> Portugal |
|                                                                             | <input type="checkbox"/> Regional (specify)<br><input type="checkbox"/> Local (specify)                                                                                                                                                                                                                                                                                                |                                                                                                                                                                                                                                                                                                                                                                                                                                                                                                                                                                                                                                                       |                                                                                                                                                                                                                                                                                                                                                                           |
| Factors                                                                     | <input type="checkbox"/> Multiple species/items (specify):<br><input checked="" type="checkbox"/> Single species/item (specify): soil                                                                                                                                                                                                                                                  |                                                                                                                                                                                                                                                                                                                                                                                                                                                                                                                                                                                                                                                       |                                                                                                                                                                                                                                                                                                                                                                           |
| Crop                                                                        | <input checked="" type="checkbox"/> No specific crop(s)<br><input type="checkbox"/> Several crops (e.g. all cereals)<br><input type="checkbox"/> Single crop                                                                                                                                                                                                                           |                                                                                                                                                                                                                                                                                                                                                                                                                                                                                                                                                                                                                                                       |                                                                                                                                                                                                                                                                                                                                                                           |
| Trait /treatment                                                            | <input checked="" type="checkbox"/> No specific traits/treatments<br><input type="checkbox"/> Several traits/treatments<br><input type="checkbox"/> Single trait/treatment                                                                                                                                                                                                             |                                                                                                                                                                                                                                                                                                                                                                                                                                                                                                                                                                                                                                                       |                                                                                                                                                                                                                                                                                                                                                                           |
| GMO                                                                         | <input checked="" type="checkbox"/> No GMO bias<br><input type="checkbox"/> GMO specific                                                                                                                                                                                                                                                                                               |                                                                                                                                                                                                                                                                                                                                                                                                                                                                                                                                                                                                                                                       |                                                                                                                                                                                                                                                                                                                                                                           |
| <b>METHODOLOGY</b>                                                          |                                                                                                                                                                                                                                                                                                                                                                                        |                                                                                                                                                                                                                                                                                                                                                                                                                                                                                                                                                                                                                                                       |                                                                                                                                                                                                                                                                                                                                                                           |

|                                                                                              |                                                                                                                                                                                                                                                                        |
|----------------------------------------------------------------------------------------------|------------------------------------------------------------------------------------------------------------------------------------------------------------------------------------------------------------------------------------------------------------------------|
| Observations                                                                                 | <input checked="" type="checkbox"/> Reported, verifiable methodology<br><input type="checkbox"/> Reported, unverifiable methodology<br><input type="checkbox"/> Unknown, unverifiable methodology                                                                      |
| Frequency                                                                                    | <input type="checkbox"/> > 1 time/year<br><input type="checkbox"/> 1 time/year<br><input checked="" type="checkbox"/> < 1 time/year                                                                                                                                    |
| Future                                                                                       | <input checked="" type="checkbox"/> For $\geq 5$ years<br><input type="checkbox"/> between 1 and 5 years<br><input type="checkbox"/> no prospect                                                                                                                       |
| Quality of performers                                                                        | <input checked="" type="checkbox"/> Trained, professionals<br><input type="checkbox"/> Trained, non-professionals – training by documentation, volunteers<br><input type="checkbox"/> Uncertain or not -specified                                                      |
| Quality of data                                                                              | <input type="checkbox"/> Standard recording of raw data<br><input type="checkbox"/> Free recording of raw data<br><input type="checkbox"/> Anecdotic                                                                                                                   |
| Analysis                                                                                     | <input checked="" type="checkbox"/> Reported, verifiable methodology<br><input type="checkbox"/> Reported, unverifiable methodology<br><input type="checkbox"/> Unknown, unverifiable methodology                                                                      |
| Quality of analysis                                                                          | <input checked="" type="checkbox"/> Scientifically based<br><input type="checkbox"/> Indicative only<br><input type="checkbox"/> Unknown                                                                                                                               |
| <b>REPORTING</b>                                                                             |                                                                                                                                                                                                                                                                        |
| Language                                                                                     | Reporting language(s): English                                                                                                                                                                                                                                         |
| Availability                                                                                 | <input checked="" type="checkbox"/> Scientific publication<br><input type="checkbox"/> Official report available on the internet or in other public forum<br><input type="checkbox"/> Official report available from network<br><input type="checkbox"/> Not available |
| Frequency                                                                                    | <input type="checkbox"/> $\geq 1$ time/year<br><input checked="" type="checkbox"/> < 1 time/year                                                                                                                                                                       |
| Historical reference                                                                         | <input type="checkbox"/> over $\geq 5$ years<br><input checked="" type="checkbox"/> between 1 and 5 years<br><input type="checkbox"/> no historical analysis                                                                                                           |
| <b>COMMENT(S)</b>                                                                            |                                                                                                                                                                                                                                                                        |
| This project is to recommend on the development of a future European Soil Monitoring System. |                                                                                                                                                                                                                                                                        |

## GSEN-09-0230.00.1bis EU – ENVASSO inventory

| EuropaBio's coordinated approach to General Surveillance: Existing Networks |                                                                                                                                                                                                                                                                                                                                                                                                                                                |                                                                                                                                                                                                                                                                                                                                                                                                                                                                                                                                                                                                                                                       |                                                                                                                                                                                                                                                                                                                                                                           |
|-----------------------------------------------------------------------------|------------------------------------------------------------------------------------------------------------------------------------------------------------------------------------------------------------------------------------------------------------------------------------------------------------------------------------------------------------------------------------------------------------------------------------------------|-------------------------------------------------------------------------------------------------------------------------------------------------------------------------------------------------------------------------------------------------------------------------------------------------------------------------------------------------------------------------------------------------------------------------------------------------------------------------------------------------------------------------------------------------------------------------------------------------------------------------------------------------------|---------------------------------------------------------------------------------------------------------------------------------------------------------------------------------------------------------------------------------------------------------------------------------------------------------------------------------------------------------------------------|
| ORGANISATION                                                                |                                                                                                                                                                                                                                                                                                                                                                                                                                                |                                                                                                                                                                                                                                                                                                                                                                                                                                                                                                                                                                                                                                                       |                                                                                                                                                                                                                                                                                                                                                                           |
| EuropaBio reference                                                         | GS-EN-09-0230                                                                                                                                                                                                                                                                                                                                                                                                                                  |                                                                                                                                                                                                                                                                                                                                                                                                                                                                                                                                                                                                                                                       |                                                                                                                                                                                                                                                                                                                                                                           |
| Official name of the Network                                                | ENVIRONMENTAL ASSESSMENT OF SOIL FOR MONITORING                                                                                                                                                                                                                                                                                                                                                                                                |                                                                                                                                                                                                                                                                                                                                                                                                                                                                                                                                                                                                                                                       |                                                                                                                                                                                                                                                                                                                                                                           |
| Other names                                                                 | ENVASSO inventory                                                                                                                                                                                                                                                                                                                                                                                                                              |                                                                                                                                                                                                                                                                                                                                                                                                                                                                                                                                                                                                                                                       |                                                                                                                                                                                                                                                                                                                                                                           |
| Type of organisation                                                        | Academic                                                                                                                                                                                                                                                                                                                                                                                                                                       |                                                                                                                                                                                                                                                                                                                                                                                                                                                                                                                                                                                                                                                       |                                                                                                                                                                                                                                                                                                                                                                           |
| Coordinates                                                                 | CRANFIELD UNIVERSITY<br>NATIONAL SOIL RESOURCES INSTITUTE<br>Cranfield<br><br>Fax: +44-01234-752970<br>Email: <a href="#">Contact</a>                                                                                                                                                                                                                                                                                                          |                                                                                                                                                                                                                                                                                                                                                                                                                                                                                                                                                                                                                                                       |                                                                                                                                                                                                                                                                                                                                                                           |
| Website                                                                     | <a href="http://eussoils.jrc.ec.europa.eu/projects/envasso/documents/ENV_Vol-IIa_Final2_web.pdf">http://eussoils.jrc.ec.europa.eu/projects/envasso/documents/ENV_Vol-IIa_Final2_web.pdf</a><br>(inventory volume IIa)<br><a href="http://eussoils.jrc.ec.europa.eu/projects/envasso/documents/ENV_Vol-IIb_Final2_web.pdf">http://eussoils.jrc.ec.europa.eu/projects/envasso/documents/ENV_Vol-IIb_Final2_web.pdf</a><br>(inventory volume IIb) |                                                                                                                                                                                                                                                                                                                                                                                                                                                                                                                                                                                                                                                       |                                                                                                                                                                                                                                                                                                                                                                           |
| Funding                                                                     | EU, Project under European Commission 6 <sup>th</sup> Framework Programme (Contract 022713, 2006-8).                                                                                                                                                                                                                                                                                                                                           |                                                                                                                                                                                                                                                                                                                                                                                                                                                                                                                                                                                                                                                       |                                                                                                                                                                                                                                                                                                                                                                           |
| Conflict of interest                                                        | -                                                                                                                                                                                                                                                                                                                                                                                                                                              |                                                                                                                                                                                                                                                                                                                                                                                                                                                                                                                                                                                                                                                       |                                                                                                                                                                                                                                                                                                                                                                           |
| Part of other network(s)                                                    |                                                                                                                                                                                                                                                                                                                                                                                                                                                |                                                                                                                                                                                                                                                                                                                                                                                                                                                                                                                                                                                                                                                       |                                                                                                                                                                                                                                                                                                                                                                           |
| Grouping other network(s)                                                   | comprises 37 partners drawn from 25 EU Member States                                                                                                                                                                                                                                                                                                                                                                                           |                                                                                                                                                                                                                                                                                                                                                                                                                                                                                                                                                                                                                                                       |                                                                                                                                                                                                                                                                                                                                                                           |
| MONITORING SUBJECT                                                          |                                                                                                                                                                                                                                                                                                                                                                                                                                                |                                                                                                                                                                                                                                                                                                                                                                                                                                                                                                                                                                                                                                                       |                                                                                                                                                                                                                                                                                                                                                                           |
| Description                                                                 | The project's main objective was to define and document a soil monitoring system for implementation in support of a Soil Framework Directive, aimed at protecting soil in the EU. Harmonisation of current and future soil monitoring activities in EU Member States.                                                                                                                                                                          |                                                                                                                                                                                                                                                                                                                                                                                                                                                                                                                                                                                                                                                       |                                                                                                                                                                                                                                                                                                                                                                           |
| Protection goal(s) and/or influencing factor(s)                             | <input checked="" type="checkbox"/> Protection goal<br><input type="checkbox"/> Biodiversity<br><input type="checkbox"/> Human Health<br><input type="checkbox"/> Animal Health<br><input type="checkbox"/> Plant Health<br><input checked="" type="checkbox"/> Soil function<br><input type="checkbox"/> Water quality<br><input checked="" type="checkbox"/> Sustainable Agriculture                                                         | <input checked="" type="checkbox"/> Influencing factor<br><input checked="" type="checkbox"/> Agronomic practice<br><input type="checkbox"/> Plant protection<br><input type="checkbox"/> GMO cultivation<br><input checked="" type="checkbox"/> Environmental conditions                                                                                                                                                                                                                                                                                                                                                                             |                                                                                                                                                                                                                                                                                                                                                                           |
| Duplication of Farmer's questionnaire                                       | <input checked="" type="checkbox"/> No duplication<br><input type="checkbox"/> Partly duplication<br><input type="checkbox"/> Complete duplication                                                                                                                                                                                                                                                                                             |                                                                                                                                                                                                                                                                                                                                                                                                                                                                                                                                                                                                                                                       |                                                                                                                                                                                                                                                                                                                                                                           |
| SPECIFICITY                                                                 |                                                                                                                                                                                                                                                                                                                                                                                                                                                |                                                                                                                                                                                                                                                                                                                                                                                                                                                                                                                                                                                                                                                       |                                                                                                                                                                                                                                                                                                                                                                           |
| Geography                                                                   | <input checked="" type="checkbox"/> EU -wide<br><input type="checkbox"/> Zone A – North<br><input type="checkbox"/> Zone B – Centre:<br><input type="checkbox"/> Zone C – South                                                                                                                                                                                                                                                                |                                                                                                                                                                                                                                                                                                                                                                                                                                                                                                                                                                                                                                                       |                                                                                                                                                                                                                                                                                                                                                                           |
|                                                                             | <input checked="" type="checkbox"/> Denmark,<br><input checked="" type="checkbox"/> Estonia,<br><input checked="" type="checkbox"/> Latvia,<br><input checked="" type="checkbox"/> Lithuania,<br><input checked="" type="checkbox"/> Finland,<br><input checked="" type="checkbox"/> Sweden                                                                                                                                                    | <input checked="" type="checkbox"/> Belgium,<br><input checked="" type="checkbox"/> Czech Republic<br><input checked="" type="checkbox"/> Germany,<br><input checked="" type="checkbox"/> Ireland,<br><input type="checkbox"/> Luxembourg,<br><input checked="" type="checkbox"/> Hungary,<br><input checked="" type="checkbox"/> Netherlands,<br><input checked="" type="checkbox"/> Austria,<br><input checked="" type="checkbox"/> Poland,<br><input checked="" type="checkbox"/> Romania,<br><input checked="" type="checkbox"/> Slovenia,<br><input checked="" type="checkbox"/> Slovakia,<br><input checked="" type="checkbox"/> United Kingdom | <input checked="" type="checkbox"/> Bulgaria,<br><input checked="" type="checkbox"/> Greece,<br><input checked="" type="checkbox"/> Spain,<br><input checked="" type="checkbox"/> France,<br><input checked="" type="checkbox"/> Italy,<br><input type="checkbox"/> Cyprus,<br><input checked="" type="checkbox"/> Malta,<br><input checked="" type="checkbox"/> Portugal |
|                                                                             | <input type="checkbox"/> Regional (specify)<br><input type="checkbox"/> Local (specify)                                                                                                                                                                                                                                                                                                                                                        |                                                                                                                                                                                                                                                                                                                                                                                                                                                                                                                                                                                                                                                       |                                                                                                                                                                                                                                                                                                                                                                           |
| Factors                                                                     | <input type="checkbox"/> Multiple species/items (specify):<br><input checked="" type="checkbox"/> Single species/item (specify): soil                                                                                                                                                                                                                                                                                                          |                                                                                                                                                                                                                                                                                                                                                                                                                                                                                                                                                                                                                                                       |                                                                                                                                                                                                                                                                                                                                                                           |
| Crop                                                                        | <input checked="" type="checkbox"/> No specific crop(s)<br><input type="checkbox"/> Several crops (e.g. all cereals)<br><input type="checkbox"/> Single crop                                                                                                                                                                                                                                                                                   |                                                                                                                                                                                                                                                                                                                                                                                                                                                                                                                                                                                                                                                       |                                                                                                                                                                                                                                                                                                                                                                           |
| Trait /treatment                                                            | <input checked="" type="checkbox"/> No specific traits/treatments<br><input type="checkbox"/> Several traits/treatments<br><input type="checkbox"/> Single trait/treatment                                                                                                                                                                                                                                                                     |                                                                                                                                                                                                                                                                                                                                                                                                                                                                                                                                                                                                                                                       |                                                                                                                                                                                                                                                                                                                                                                           |



|                                                                                              |                                                                                                                                                                                                                                                                        |
|----------------------------------------------------------------------------------------------|------------------------------------------------------------------------------------------------------------------------------------------------------------------------------------------------------------------------------------------------------------------------|
| GMO                                                                                          | <input checked="" type="checkbox"/> No GMO bias<br><input type="checkbox"/> GMO specific                                                                                                                                                                               |
| <b>METHODOLOGY</b>                                                                           |                                                                                                                                                                                                                                                                        |
| Observations                                                                                 | <input checked="" type="checkbox"/> Reported, verifiable methodology<br><input type="checkbox"/> Reported, unverifiable methodology<br><input type="checkbox"/> Unknown, unverifiable methodology                                                                      |
| Frequency                                                                                    | <input type="checkbox"/> > 1 time/year<br><input type="checkbox"/> 1 time/year<br><input checked="" type="checkbox"/> < 1 time/year                                                                                                                                    |
| Future                                                                                       | <input checked="" type="checkbox"/> For $\geq 5$ years<br><input type="checkbox"/> between 1 and 5 years<br><input type="checkbox"/> no prospect                                                                                                                       |
| Quality of performers                                                                        | <input checked="" type="checkbox"/> Trained, professionals<br><input type="checkbox"/> Trained, non-professionals – training by documentation, volunteers<br><input type="checkbox"/> Uncertain or not -specified                                                      |
| Quality of data                                                                              | <input type="checkbox"/> Standard recording of raw data<br><input type="checkbox"/> Free recording of raw data<br><input type="checkbox"/> Anecdotic                                                                                                                   |
| Analysis                                                                                     | <input checked="" type="checkbox"/> Reported, verifiable methodology<br><input type="checkbox"/> Reported, unverifiable methodology<br><input type="checkbox"/> Unknown, unverifiable methodology                                                                      |
| Quality of analysis                                                                          | <input checked="" type="checkbox"/> Scientifically based<br><input type="checkbox"/> Indicative only<br><input type="checkbox"/> Unknown                                                                                                                               |
| <b>REPORTING</b>                                                                             |                                                                                                                                                                                                                                                                        |
| Language                                                                                     | Reporting language(s): English                                                                                                                                                                                                                                         |
| Availability                                                                                 | <input checked="" type="checkbox"/> Scientific publication<br><input type="checkbox"/> Official report available on the internet or in other public forum<br><input type="checkbox"/> Official report available from network<br><input type="checkbox"/> Not available |
| Frequency                                                                                    | <input type="checkbox"/> $\geq 1$ time/year<br><input checked="" type="checkbox"/> < 1 time/year                                                                                                                                                                       |
| Historical reference                                                                         | <input type="checkbox"/> over $\geq 5$ years<br><input checked="" type="checkbox"/> between 1 and 5 years<br><input type="checkbox"/> no historical analysis                                                                                                           |
| <b>COMMENT(S)</b>                                                                            |                                                                                                                                                                                                                                                                        |
| This project is to recommend on the development of a future European Soil Monitoring System. |                                                                                                                                                                                                                                                                        |

## Denmark

## GSEN-09-0149.00.1 DK – Skov- og Naturstyrelsen

| EuropaBio's coordinated approach to General Surveillance: Existing Networks |                                                                                                                                                                                                                                                                                                                                                                                          |                                                                                                                                                                                                                                                                                                                                                                                                                                                                                                                   |                                                                                                                                                                                                                                                                                              |
|-----------------------------------------------------------------------------|------------------------------------------------------------------------------------------------------------------------------------------------------------------------------------------------------------------------------------------------------------------------------------------------------------------------------------------------------------------------------------------|-------------------------------------------------------------------------------------------------------------------------------------------------------------------------------------------------------------------------------------------------------------------------------------------------------------------------------------------------------------------------------------------------------------------------------------------------------------------------------------------------------------------|----------------------------------------------------------------------------------------------------------------------------------------------------------------------------------------------------------------------------------------------------------------------------------------------|
| <b>ORGANISATION</b>                                                         |                                                                                                                                                                                                                                                                                                                                                                                          |                                                                                                                                                                                                                                                                                                                                                                                                                                                                                                                   |                                                                                                                                                                                                                                                                                              |
| EuropaBio reference                                                         | GS-EN-09-0149                                                                                                                                                                                                                                                                                                                                                                            |                                                                                                                                                                                                                                                                                                                                                                                                                                                                                                                   |                                                                                                                                                                                                                                                                                              |
| Official name of the Network                                                | <b>Skov- og Naturstyrelsen</b>                                                                                                                                                                                                                                                                                                                                                           |                                                                                                                                                                                                                                                                                                                                                                                                                                                                                                                   |                                                                                                                                                                                                                                                                                              |
| Other names                                                                 | Danish Forest and Nature Agency<br>Ministry of the Environment                                                                                                                                                                                                                                                                                                                           |                                                                                                                                                                                                                                                                                                                                                                                                                                                                                                                   |                                                                                                                                                                                                                                                                                              |
| Type of organisation                                                        | Governmental                                                                                                                                                                                                                                                                                                                                                                             |                                                                                                                                                                                                                                                                                                                                                                                                                                                                                                                   |                                                                                                                                                                                                                                                                                              |
| Coordinates                                                                 | Haraldsgade 53,<br>2100 København Ø<br><br>Fax 39 27 98 99<br>Email: <a href="mailto:sns[at]sns.dk">sns[at]sns.dk</a>                                                                                                                                                                                                                                                                    |                                                                                                                                                                                                                                                                                                                                                                                                                                                                                                                   |                                                                                                                                                                                                                                                                                              |
| Website                                                                     | <a href="http://www.naturstyrelsen.dk/">http://www.naturstyrelsen.dk/</a>                                                                                                                                                                                                                                                                                                                |                                                                                                                                                                                                                                                                                                                                                                                                                                                                                                                   |                                                                                                                                                                                                                                                                                              |
| Funding                                                                     | Government                                                                                                                                                                                                                                                                                                                                                                               |                                                                                                                                                                                                                                                                                                                                                                                                                                                                                                                   |                                                                                                                                                                                                                                                                                              |
| Conflict of interest                                                        | -                                                                                                                                                                                                                                                                                                                                                                                        |                                                                                                                                                                                                                                                                                                                                                                                                                                                                                                                   |                                                                                                                                                                                                                                                                                              |
| Part of other network(s)                                                    |                                                                                                                                                                                                                                                                                                                                                                                          |                                                                                                                                                                                                                                                                                                                                                                                                                                                                                                                   |                                                                                                                                                                                                                                                                                              |
| Grouping other network(s)                                                   | 19 local units                                                                                                                                                                                                                                                                                                                                                                           |                                                                                                                                                                                                                                                                                                                                                                                                                                                                                                                   |                                                                                                                                                                                                                                                                                              |
| <b>MONITORING SUBJECT</b>                                                   |                                                                                                                                                                                                                                                                                                                                                                                          |                                                                                                                                                                                                                                                                                                                                                                                                                                                                                                                   |                                                                                                                                                                                                                                                                                              |
| Description                                                                 | Information on protected species, genetic resources, monitoring of invasive species and monitoring within the 'Action Plan for Biodiversity and Nature Conservation 2004-2009'                                                                                                                                                                                                           |                                                                                                                                                                                                                                                                                                                                                                                                                                                                                                                   |                                                                                                                                                                                                                                                                                              |
| Protection goal(s) and/or influencing factor(s)                             | <input checked="" type="checkbox"/> Protection goal<br><br><input checked="" type="checkbox"/> Biodiversity: general<br><input type="checkbox"/> Human Health<br><input type="checkbox"/> Animal Health<br><input type="checkbox"/> Plant Health<br><input type="checkbox"/> Soil function<br><input type="checkbox"/> Water quality<br><input type="checkbox"/> Sustainable Agriculture | <input checked="" type="checkbox"/> Influencing factor<br><br><input type="checkbox"/> Agronomic practice<br><input type="checkbox"/> Plant protection<br><input type="checkbox"/> GMO cultivation<br><input checked="" type="checkbox"/> Environmental conditions                                                                                                                                                                                                                                                |                                                                                                                                                                                                                                                                                              |
| Duplication of Farmer's questionnaire                                       | <input checked="" type="checkbox"/> No duplication<br><input type="checkbox"/> Partly duplication<br><input type="checkbox"/> Complete duplication                                                                                                                                                                                                                                       |                                                                                                                                                                                                                                                                                                                                                                                                                                                                                                                   |                                                                                                                                                                                                                                                                                              |
| <b>SPECIFICITY</b>                                                          |                                                                                                                                                                                                                                                                                                                                                                                          |                                                                                                                                                                                                                                                                                                                                                                                                                                                                                                                   |                                                                                                                                                                                                                                                                                              |
| Geography                                                                   | <input type="checkbox"/> EU -wide<br><br><input checked="" type="checkbox"/> Zone A – North<br><input type="checkbox"/> Zone B – Centre:<br><input type="checkbox"/> Zone C – South                                                                                                                                                                                                      |                                                                                                                                                                                                                                                                                                                                                                                                                                                                                                                   |                                                                                                                                                                                                                                                                                              |
|                                                                             | <input checked="" type="checkbox"/> Denmark,<br><input type="checkbox"/> Estonia,<br><input type="checkbox"/> Latvia,<br><input type="checkbox"/> Lithuania,<br><input type="checkbox"/> Finland,<br><input type="checkbox"/> Sweden                                                                                                                                                     | <input type="checkbox"/> Belgium,<br><input type="checkbox"/> Czech Republic<br><input type="checkbox"/> Germany,<br><input type="checkbox"/> Ireland,<br><input type="checkbox"/> Luxembourg,<br><input type="checkbox"/> Hungary,<br><input type="checkbox"/> Netherlands,<br><input type="checkbox"/> Austria,<br><input type="checkbox"/> Poland,<br><input type="checkbox"/> Romania,<br><input type="checkbox"/> Slovenia,<br><input type="checkbox"/> Slovakia,<br><input type="checkbox"/> United Kingdom | <input type="checkbox"/> Bulgaria,<br><input type="checkbox"/> Greece,<br><input type="checkbox"/> Spain,<br><input type="checkbox"/> France,<br><input type="checkbox"/> Italy,<br><input type="checkbox"/> Cyprus,<br><input type="checkbox"/> Malta,<br><input type="checkbox"/> Portugal |
|                                                                             | <input type="checkbox"/> Regional (specify)<br><input type="checkbox"/> Local (specify)                                                                                                                                                                                                                                                                                                  |                                                                                                                                                                                                                                                                                                                                                                                                                                                                                                                   |                                                                                                                                                                                                                                                                                              |
| Factors                                                                     | <input checked="" type="checkbox"/> Multiple species/items (specify): plants and animals<br><input type="checkbox"/> Single species/item (specify)                                                                                                                                                                                                                                       |                                                                                                                                                                                                                                                                                                                                                                                                                                                                                                                   |                                                                                                                                                                                                                                                                                              |
| Crop                                                                        | <input checked="" type="checkbox"/> No specific crop(s)<br><input type="checkbox"/> Several crops (e.g. all cereals)<br><input type="checkbox"/> Single crop                                                                                                                                                                                                                             |                                                                                                                                                                                                                                                                                                                                                                                                                                                                                                                   |                                                                                                                                                                                                                                                                                              |
| Trait /treatment                                                            | <input checked="" type="checkbox"/> No specific traits/treatments<br><input type="checkbox"/> Several traits/treatments<br><input type="checkbox"/> Single trait/treatment                                                                                                                                                                                                               |                                                                                                                                                                                                                                                                                                                                                                                                                                                                                                                   |                                                                                                                                                                                                                                                                                              |
| GMO                                                                         | <input checked="" type="checkbox"/> No GMO bias<br><input type="checkbox"/> GMO specific                                                                                                                                                                                                                                                                                                 |                                                                                                                                                                                                                                                                                                                                                                                                                                                                                                                   |                                                                                                                                                                                                                                                                                              |
| <b>METHODOLOGY</b>                                                          |                                                                                                                                                                                                                                                                                                                                                                                          |                                                                                                                                                                                                                                                                                                                                                                                                                                                                                                                   |                                                                                                                                                                                                                                                                                              |

|                                                                                                                |                                                                                                                                                                                                                                                                        |
|----------------------------------------------------------------------------------------------------------------|------------------------------------------------------------------------------------------------------------------------------------------------------------------------------------------------------------------------------------------------------------------------|
| Observations                                                                                                   | <input type="checkbox"/> Reported, verifiable methodology<br><input type="checkbox"/> Reported, unverifiable methodology<br><input type="checkbox"/> Unknown, unverifiable methodology                                                                                 |
| Frequency                                                                                                      | <input checked="" type="checkbox"/> > 1 time/year<br><input checked="" type="checkbox"/> 1 time/year<br><input type="checkbox"/> < 1 time/year                                                                                                                         |
| Future                                                                                                         | <input checked="" type="checkbox"/> For ≥ 5 years<br><input type="checkbox"/> between 1 and 5 years<br><input type="checkbox"/> no prospect                                                                                                                            |
| Quality of performers                                                                                          | <input type="checkbox"/> Trained, professionals<br><input checked="" type="checkbox"/> Trained, non-professionals – training by documentation, volunteers<br><input type="checkbox"/> Uncertain or not -specified                                                      |
| Quality of data                                                                                                | <input checked="" type="checkbox"/> Standard recording of raw data<br><input type="checkbox"/> Free recording of raw data<br><input type="checkbox"/> Anecdotic                                                                                                        |
| Analysis                                                                                                       | <input type="checkbox"/> Reported, verifiable methodology<br><input type="checkbox"/> Reported, unverifiable methodology<br><input type="checkbox"/> Unknown, unverifiable methodology                                                                                 |
| Quality of analysis                                                                                            | <input type="checkbox"/> Scientifically based<br><input type="checkbox"/> Indicative only<br><input type="checkbox"/> Unknown                                                                                                                                          |
| <b>REPORTING</b>                                                                                               |                                                                                                                                                                                                                                                                        |
| Language                                                                                                       | Reporting language(s): Danish                                                                                                                                                                                                                                          |
| Availability                                                                                                   | <input type="checkbox"/> Scientific publication<br><input checked="" type="checkbox"/> Official report available on the internet or in other public forum<br><input type="checkbox"/> Official report available from network<br><input type="checkbox"/> Not available |
| Frequency                                                                                                      | <input checked="" type="checkbox"/> ≥ 1 time/year<br><input type="checkbox"/> < 1 time/year                                                                                                                                                                            |
| Historical reference                                                                                           | <input type="checkbox"/> over ≥ 5 years<br><input checked="" type="checkbox"/> between 1 and 5 years<br><input type="checkbox"/> no historical analysis                                                                                                                |
| <b>COMMENT(S)</b>                                                                                              |                                                                                                                                                                                                                                                                        |
| Official communication channel. Annual reports (Action Plan for Biodiversity and Nature Conservation) via BCH. |                                                                                                                                                                                                                                                                        |

## France

## GSEN-09-0119.00.1 F – Min of environment

| EuropaBio's coordinated approach to General Surveillance: Existing Networks |                                                                                                                                                                                                                                                                                                                                                                                                                                             |                                                                                                                                                                                                                                                                                                                                                                                                                                                                                                                   |                                                                                                                                                                                                                                                                                                         |
|-----------------------------------------------------------------------------|---------------------------------------------------------------------------------------------------------------------------------------------------------------------------------------------------------------------------------------------------------------------------------------------------------------------------------------------------------------------------------------------------------------------------------------------|-------------------------------------------------------------------------------------------------------------------------------------------------------------------------------------------------------------------------------------------------------------------------------------------------------------------------------------------------------------------------------------------------------------------------------------------------------------------------------------------------------------------|---------------------------------------------------------------------------------------------------------------------------------------------------------------------------------------------------------------------------------------------------------------------------------------------------------|
| ORGANISATION                                                                |                                                                                                                                                                                                                                                                                                                                                                                                                                             |                                                                                                                                                                                                                                                                                                                                                                                                                                                                                                                   |                                                                                                                                                                                                                                                                                                         |
| EuropaBio reference                                                         | GS-EN-09-0119                                                                                                                                                                                                                                                                                                                                                                                                                               |                                                                                                                                                                                                                                                                                                                                                                                                                                                                                                                   |                                                                                                                                                                                                                                                                                                         |
| Official name of the Network                                                | <b>Ministère de l'Écologie, de l'Énergie, du Développement durable et de la Mer</b><br>Observation et Statistiques de l'Environnement<br>Institut Français de l'Environnement                                                                                                                                                                                                                                                               |                                                                                                                                                                                                                                                                                                                                                                                                                                                                                                                   |                                                                                                                                                                                                                                                                                                         |
| Other names                                                                 | Ministry of ecology, sustainable development and Energy: Observation and statistics Service (formerly IFEN)                                                                                                                                                                                                                                                                                                                                 |                                                                                                                                                                                                                                                                                                                                                                                                                                                                                                                   |                                                                                                                                                                                                                                                                                                         |
| Type of organisation                                                        | Governmental                                                                                                                                                                                                                                                                                                                                                                                                                                |                                                                                                                                                                                                                                                                                                                                                                                                                                                                                                                   |                                                                                                                                                                                                                                                                                                         |
| Coordinates                                                                 | Commissariat général au développement durable<br>Service de l'observation et des statistiques - Site d'Orléans<br>5, route d'Olivet<br>BP 16105<br>45061 ORLEANS CEDEX 2<br><br>Fax: 02 38 79 78 70<br>Email: <a href="mailto:cgdd-soes-orleans[at]developpement-durable.gouv.fr">cgdd-soes-orleans[at]developpement-durable.gouv.fr</a>                                                                                                    |                                                                                                                                                                                                                                                                                                                                                                                                                                                                                                                   |                                                                                                                                                                                                                                                                                                         |
| Website                                                                     | <a href="http://www.developpement-durable.gouv.fr/">http://www.developpement-durable.gouv.fr/</a><br><a href="http://www.statistiques.developpement-durable.gouv.fr/">http://www.statistiques.developpement-durable.gouv.fr/</a>                                                                                                                                                                                                            |                                                                                                                                                                                                                                                                                                                                                                                                                                                                                                                   |                                                                                                                                                                                                                                                                                                         |
| Funding                                                                     | public                                                                                                                                                                                                                                                                                                                                                                                                                                      |                                                                                                                                                                                                                                                                                                                                                                                                                                                                                                                   |                                                                                                                                                                                                                                                                                                         |
| Conflict of interest                                                        | -                                                                                                                                                                                                                                                                                                                                                                                                                                           |                                                                                                                                                                                                                                                                                                                                                                                                                                                                                                                   |                                                                                                                                                                                                                                                                                                         |
| Part of other network(s)                                                    | -                                                                                                                                                                                                                                                                                                                                                                                                                                           |                                                                                                                                                                                                                                                                                                                                                                                                                                                                                                                   |                                                                                                                                                                                                                                                                                                         |
| Grouping other network(s)                                                   | -                                                                                                                                                                                                                                                                                                                                                                                                                                           |                                                                                                                                                                                                                                                                                                                                                                                                                                                                                                                   |                                                                                                                                                                                                                                                                                                         |
| MONITORING SUBJECT                                                          |                                                                                                                                                                                                                                                                                                                                                                                                                                             |                                                                                                                                                                                                                                                                                                                                                                                                                                                                                                                   |                                                                                                                                                                                                                                                                                                         |
| Description                                                                 | Reports and Statistics on biodiversity, air, soil, water quality, waste, fertiliser and pesticide use, sustainability.<br>Describes the status and evolution of the environment in France in general.                                                                                                                                                                                                                                       |                                                                                                                                                                                                                                                                                                                                                                                                                                                                                                                   |                                                                                                                                                                                                                                                                                                         |
| Protection goal(s) and/or influencing factor(s)                             | <input checked="" type="checkbox"/> Protection goal<br><input checked="" type="checkbox"/> Biodiversity: general<br><input type="checkbox"/> Human Health<br><input checked="" type="checkbox"/> Animal Health<br><input checked="" type="checkbox"/> Plant Health<br><input checked="" type="checkbox"/> Soil function<br><input checked="" type="checkbox"/> Water quality<br><input checked="" type="checkbox"/> Sustainable Agriculture | <input checked="" type="checkbox"/> Influencing factor<br><input checked="" type="checkbox"/> Agronomic practice<br><input type="checkbox"/> Plant protection<br><input type="checkbox"/> GMO cultivation<br><input checked="" type="checkbox"/> Environmental conditions                                                                                                                                                                                                                                         |                                                                                                                                                                                                                                                                                                         |
| Duplication of Farmer's questionnaire                                       | <input type="checkbox"/> No duplication<br><input checked="" type="checkbox"/> Partly duplication<br><input type="checkbox"/> Complete duplication                                                                                                                                                                                                                                                                                          |                                                                                                                                                                                                                                                                                                                                                                                                                                                                                                                   |                                                                                                                                                                                                                                                                                                         |
| SPECIFICITY                                                                 |                                                                                                                                                                                                                                                                                                                                                                                                                                             |                                                                                                                                                                                                                                                                                                                                                                                                                                                                                                                   |                                                                                                                                                                                                                                                                                                         |
| Geography                                                                   | <input type="checkbox"/> EU -wide<br><input type="checkbox"/> Zone A – North<br><input type="checkbox"/> Zone B – Centre:<br><input type="checkbox"/> Zone C – South                                                                                                                                                                                                                                                                        |                                                                                                                                                                                                                                                                                                                                                                                                                                                                                                                   |                                                                                                                                                                                                                                                                                                         |
|                                                                             | <input type="checkbox"/> Denmark,<br><input type="checkbox"/> Estonia,<br><input type="checkbox"/> Latvia,<br><input type="checkbox"/> Lithuania,<br><input type="checkbox"/> Finland,<br><input type="checkbox"/> Sweden                                                                                                                                                                                                                   | <input type="checkbox"/> Belgium,<br><input type="checkbox"/> Czech Republic<br><input type="checkbox"/> Germany,<br><input type="checkbox"/> Ireland,<br><input type="checkbox"/> Luxembourg,<br><input type="checkbox"/> Hungary,<br><input type="checkbox"/> Netherlands,<br><input type="checkbox"/> Austria,<br><input type="checkbox"/> Poland,<br><input type="checkbox"/> Romania,<br><input type="checkbox"/> Slovenia,<br><input type="checkbox"/> Slovakia,<br><input type="checkbox"/> United Kingdom | <input type="checkbox"/> Bulgaria,<br><input type="checkbox"/> Greece,<br><input type="checkbox"/> Spain,<br><input checked="" type="checkbox"/> France,<br><input type="checkbox"/> Italy,<br><input type="checkbox"/> Cyprus,<br><input type="checkbox"/> Malta,<br><input type="checkbox"/> Portugal |
|                                                                             | <input type="checkbox"/> Regional (specify)<br><input type="checkbox"/> Local (specify)                                                                                                                                                                                                                                                                                                                                                     |                                                                                                                                                                                                                                                                                                                                                                                                                                                                                                                   |                                                                                                                                                                                                                                                                                                         |
| Factors                                                                     | <input checked="" type="checkbox"/> Multiple species/items (specify): biodiversity, environment in general<br><input type="checkbox"/> Single species/item (specify)                                                                                                                                                                                                                                                                        |                                                                                                                                                                                                                                                                                                                                                                                                                                                                                                                   |                                                                                                                                                                                                                                                                                                         |
| Crop                                                                        | <input type="checkbox"/> No specific crop(s)<br><input type="checkbox"/> Several crops (e.g. all cereals)<br><input type="checkbox"/> Single crop                                                                                                                                                                                                                                                                                           |                                                                                                                                                                                                                                                                                                                                                                                                                                                                                                                   |                                                                                                                                                                                                                                                                                                         |
| Trait /treatment                                                            | <input type="checkbox"/> No specific traits/treatments                                                                                                                                                                                                                                                                                                                                                                                      |                                                                                                                                                                                                                                                                                                                                                                                                                                                                                                                   |                                                                                                                                                                                                                                                                                                         |

|                                                                                                                          |                                                                                                                                                                                                                                                                        |
|--------------------------------------------------------------------------------------------------------------------------|------------------------------------------------------------------------------------------------------------------------------------------------------------------------------------------------------------------------------------------------------------------------|
|                                                                                                                          | <input type="checkbox"/> Several traits/treatments<br><input type="checkbox"/> Single trait/treatment                                                                                                                                                                  |
| GMO                                                                                                                      | <input checked="" type="checkbox"/> No GMO bias<br><input type="checkbox"/> GMO specific                                                                                                                                                                               |
| <b>METHODOLOGY</b>                                                                                                       |                                                                                                                                                                                                                                                                        |
| Observations                                                                                                             | <input type="checkbox"/> Reported, verifiable methodology<br><input checked="" type="checkbox"/> Reported, unverifiable methodology<br><input type="checkbox"/> Unknown, unverifiable methodology                                                                      |
| Frequency                                                                                                                | <input type="checkbox"/> > 1 time/year<br><input checked="" type="checkbox"/> 1 time/year:<br><input checked="" type="checkbox"/> < 1 time/year                                                                                                                        |
| Future                                                                                                                   | <input type="checkbox"/> For $\geq 5$ years<br><input type="checkbox"/> between 1 and 5 years<br><input type="checkbox"/> no prospect                                                                                                                                  |
| Quality of performers                                                                                                    | <input checked="" type="checkbox"/> Trained, professionals<br><input type="checkbox"/> Trained, non-professionals – training by documentation, volunteers<br><input type="checkbox"/> Uncertain or not -specified                                                      |
| Quality of data                                                                                                          | <input checked="" type="checkbox"/> Standard recording of raw data<br><input type="checkbox"/> Free recording of raw data<br><input type="checkbox"/> Anecdotic                                                                                                        |
| Analysis                                                                                                                 | <input checked="" type="checkbox"/> Reported, verifiable methodology<br><input type="checkbox"/> Reported, unverifiable methodology<br><input type="checkbox"/> Unknown, unverifiable methodology                                                                      |
| Quality of analysis                                                                                                      | <input checked="" type="checkbox"/> Scientifically based<br><input type="checkbox"/> Indicative only<br><input type="checkbox"/> Unknown                                                                                                                               |
| <b>REPORTING</b>                                                                                                         |                                                                                                                                                                                                                                                                        |
| Language                                                                                                                 | <input checked="" type="checkbox"/> Specify reporting language(s): French                                                                                                                                                                                              |
| Availability                                                                                                             | <input type="checkbox"/> Scientific publication<br><input checked="" type="checkbox"/> Official report available on the internet or in other public forum<br><input type="checkbox"/> Official report available from network<br><input type="checkbox"/> Not available |
| Frequency                                                                                                                | <input checked="" type="checkbox"/> $\geq 1$ time/year – yearly figures and trends<br><input checked="" type="checkbox"/> < 1 time/year – Report "L'environnement en France" last issue 2006                                                                           |
| Historical reference                                                                                                     | <input checked="" type="checkbox"/> over $\geq 5$ years: same subjects analyzed in the past in different formats.<br><input type="checkbox"/> between 1 and 5 years<br><input type="checkbox"/> no historical analysis                                                 |
| <b>COMMENT(S)</b>                                                                                                        |                                                                                                                                                                                                                                                                        |
| Broad general monitoring network; uses environmental indicators to describe the status and evolution of the environment. |                                                                                                                                                                                                                                                                        |

## GSEN-09-0121.00.1 F – Min of agriculture (biodiversity)

| EuropaBio's coordinated approach to General Surveillance: Existing Networks |                                                                                                                                                                                                                                                                                                                                                                                                 |                                                                                                                                                                                                                                                                                                                                                                                                                                                                                                                   |                                                                                                                                                                                                                                                                                                         |
|-----------------------------------------------------------------------------|-------------------------------------------------------------------------------------------------------------------------------------------------------------------------------------------------------------------------------------------------------------------------------------------------------------------------------------------------------------------------------------------------|-------------------------------------------------------------------------------------------------------------------------------------------------------------------------------------------------------------------------------------------------------------------------------------------------------------------------------------------------------------------------------------------------------------------------------------------------------------------------------------------------------------------|---------------------------------------------------------------------------------------------------------------------------------------------------------------------------------------------------------------------------------------------------------------------------------------------------------|
| <b>ORGANISATION</b>                                                         |                                                                                                                                                                                                                                                                                                                                                                                                 |                                                                                                                                                                                                                                                                                                                                                                                                                                                                                                                   |                                                                                                                                                                                                                                                                                                         |
| EuropaBio reference                                                         | GS-EN-09-0121                                                                                                                                                                                                                                                                                                                                                                                   |                                                                                                                                                                                                                                                                                                                                                                                                                                                                                                                   |                                                                                                                                                                                                                                                                                                         |
| Official name of the Network                                                | <b>Ministère de l'Alimentation, de l'Agriculture et de la Pêche</b><br>+ Several partners                                                                                                                                                                                                                                                                                                       |                                                                                                                                                                                                                                                                                                                                                                                                                                                                                                                   |                                                                                                                                                                                                                                                                                                         |
| Other names                                                                 | Ministry of Food, Agriculture and Fisheries: National strategy for biodiversity                                                                                                                                                                                                                                                                                                                 |                                                                                                                                                                                                                                                                                                                                                                                                                                                                                                                   |                                                                                                                                                                                                                                                                                                         |
| Type of organisation                                                        | Governmental                                                                                                                                                                                                                                                                                                                                                                                    |                                                                                                                                                                                                                                                                                                                                                                                                                                                                                                                   |                                                                                                                                                                                                                                                                                                         |
| Coordinates                                                                 | Ministère de l'agriculture et de la pêche<br>78, rue de Varenne<br>75349 Paris 07 SP                                                                                                                                                                                                                                                                                                            |                                                                                                                                                                                                                                                                                                                                                                                                                                                                                                                   |                                                                                                                                                                                                                                                                                                         |
| Website                                                                     | <a href="http://agriculture.gouv.fr/Biodiversite">http://agriculture.gouv.fr/Biodiversite</a><br><a href="http://agriculture.gouv.fr/sections/thematiques/environnement">http://agriculture.gouv.fr/sections/thematiques/environnement</a><br><a href="http://agriculture.gouv.fr/environnement">http://agriculture.gouv.fr/environnement</a>                                                   |                                                                                                                                                                                                                                                                                                                                                                                                                                                                                                                   |                                                                                                                                                                                                                                                                                                         |
| Funding                                                                     | public                                                                                                                                                                                                                                                                                                                                                                                          |                                                                                                                                                                                                                                                                                                                                                                                                                                                                                                                   |                                                                                                                                                                                                                                                                                                         |
| Conflict of interest                                                        | -                                                                                                                                                                                                                                                                                                                                                                                               |                                                                                                                                                                                                                                                                                                                                                                                                                                                                                                                   |                                                                                                                                                                                                                                                                                                         |
| Part of other network(s)                                                    | -                                                                                                                                                                                                                                                                                                                                                                                               |                                                                                                                                                                                                                                                                                                                                                                                                                                                                                                                   |                                                                                                                                                                                                                                                                                                         |
| Grouping other network(s)                                                   | -                                                                                                                                                                                                                                                                                                                                                                                               |                                                                                                                                                                                                                                                                                                                                                                                                                                                                                                                   |                                                                                                                                                                                                                                                                                                         |
| <b>MONITORING SUBJECT</b>                                                   |                                                                                                                                                                                                                                                                                                                                                                                                 |                                                                                                                                                                                                                                                                                                                                                                                                                                                                                                                   |                                                                                                                                                                                                                                                                                                         |
| Description                                                                 | Action plan (2009-2010) on "agriculture and biodiversity" aims to establish a system to observe de evolution of biodiversity in relation to agricultural practises. Up to 2013, 10 action plan have been adopted.                                                                                                                                                                               |                                                                                                                                                                                                                                                                                                                                                                                                                                                                                                                   |                                                                                                                                                                                                                                                                                                         |
| Protection goal(s) and/or influencing factor(s)                             | <input checked="" type="checkbox"/> Protection goal<br><input checked="" type="checkbox"/> Biodiversity: general<br><input type="checkbox"/> Human Health<br><input type="checkbox"/> Animal Health<br><input type="checkbox"/> Plant Health<br><input type="checkbox"/> Soil function<br><input type="checkbox"/> Water quality<br><input checked="" type="checkbox"/> Sustainable Agriculture | <input checked="" type="checkbox"/> Influencing factor<br><input checked="" type="checkbox"/> Agronomic practice<br><input type="checkbox"/> Plant protection<br><input type="checkbox"/> GMO cultivation<br><input type="checkbox"/> Environmental conditions                                                                                                                                                                                                                                                    |                                                                                                                                                                                                                                                                                                         |
| Duplication of Farmer's questionnaire                                       | <input type="checkbox"/> No duplication<br><input checked="" type="checkbox"/> Partly duplication<br><input type="checkbox"/> Complete duplication                                                                                                                                                                                                                                              |                                                                                                                                                                                                                                                                                                                                                                                                                                                                                                                   |                                                                                                                                                                                                                                                                                                         |
| <b>SPECIFICITY</b>                                                          |                                                                                                                                                                                                                                                                                                                                                                                                 |                                                                                                                                                                                                                                                                                                                                                                                                                                                                                                                   |                                                                                                                                                                                                                                                                                                         |
| Geography                                                                   | <input type="checkbox"/> EU -wide                                                                                                                                                                                                                                                                                                                                                               |                                                                                                                                                                                                                                                                                                                                                                                                                                                                                                                   |                                                                                                                                                                                                                                                                                                         |
|                                                                             | <input type="checkbox"/> Zone A – North                                                                                                                                                                                                                                                                                                                                                         | <input type="checkbox"/> Zone B – Centre:                                                                                                                                                                                                                                                                                                                                                                                                                                                                         | <input type="checkbox"/> Zone C – South                                                                                                                                                                                                                                                                 |
|                                                                             | <input type="checkbox"/> Denmark,<br><input type="checkbox"/> Estonia,<br><input type="checkbox"/> Latvia,<br><input type="checkbox"/> Lithuania,<br><input type="checkbox"/> Finland,<br><input type="checkbox"/> Sweden                                                                                                                                                                       | <input type="checkbox"/> Belgium,<br><input type="checkbox"/> Czech Republic<br><input type="checkbox"/> Germany,<br><input type="checkbox"/> Ireland,<br><input type="checkbox"/> Luxembourg,<br><input type="checkbox"/> Hungary,<br><input type="checkbox"/> Netherlands,<br><input type="checkbox"/> Austria,<br><input type="checkbox"/> Poland,<br><input type="checkbox"/> Romania,<br><input type="checkbox"/> Slovenia,<br><input type="checkbox"/> Slovakia,<br><input type="checkbox"/> United Kingdom | <input type="checkbox"/> Bulgaria,<br><input type="checkbox"/> Greece,<br><input type="checkbox"/> Spain,<br><input checked="" type="checkbox"/> France,<br><input type="checkbox"/> Italy,<br><input type="checkbox"/> Cyprus,<br><input type="checkbox"/> Malta,<br><input type="checkbox"/> Portugal |
|                                                                             | <input type="checkbox"/> Regional (specify)<br><input type="checkbox"/> Local (specify)                                                                                                                                                                                                                                                                                                         |                                                                                                                                                                                                                                                                                                                                                                                                                                                                                                                   |                                                                                                                                                                                                                                                                                                         |
| Factors                                                                     | <input checked="" type="checkbox"/> Multiple species/items (specify): biodiversity, environment in general<br><input type="checkbox"/> Single species/item (specify)                                                                                                                                                                                                                            |                                                                                                                                                                                                                                                                                                                                                                                                                                                                                                                   |                                                                                                                                                                                                                                                                                                         |
| Crop                                                                        | <input type="checkbox"/> No specific crop(s)<br><input type="checkbox"/> Several crops (e.g. all cereals)<br><input type="checkbox"/> Single crop                                                                                                                                                                                                                                               |                                                                                                                                                                                                                                                                                                                                                                                                                                                                                                                   |                                                                                                                                                                                                                                                                                                         |
| Trait /treatment                                                            | <input type="checkbox"/> No specific traits/treatments<br><input type="checkbox"/> Several traits/treatments<br><input type="checkbox"/> Single trait/treatment                                                                                                                                                                                                                                 |                                                                                                                                                                                                                                                                                                                                                                                                                                                                                                                   |                                                                                                                                                                                                                                                                                                         |
| GMO                                                                         | <input checked="" type="checkbox"/> No GMO bias<br><input type="checkbox"/> GMO specific                                                                                                                                                                                                                                                                                                        |                                                                                                                                                                                                                                                                                                                                                                                                                                                                                                                   |                                                                                                                                                                                                                                                                                                         |
| <b>METHODOLOGY</b>                                                          |                                                                                                                                                                                                                                                                                                                                                                                                 |                                                                                                                                                                                                                                                                                                                                                                                                                                                                                                                   |                                                                                                                                                                                                                                                                                                         |



|                                                                                                                                                     |                                                                                                                                                                                                                                                             |
|-----------------------------------------------------------------------------------------------------------------------------------------------------|-------------------------------------------------------------------------------------------------------------------------------------------------------------------------------------------------------------------------------------------------------------|
| Observations                                                                                                                                        | <input type="checkbox"/> Reported, verifiable methodology<br><input type="checkbox"/> Reported, unverifiable methodology<br><input type="checkbox"/> Unknown, unverifiable methodology                                                                      |
| Frequency                                                                                                                                           | <input type="checkbox"/> > 1 time/year<br><input type="checkbox"/> 1 time/year:<br><input type="checkbox"/> < 1 time/year                                                                                                                                   |
| Future                                                                                                                                              | <input type="checkbox"/> For $\geq$ 5 years<br><input type="checkbox"/> between 1 and 5 years<br><input type="checkbox"/> no prospect                                                                                                                       |
| Quality of performers                                                                                                                               | <input checked="" type="checkbox"/> Trained, professionals<br><input checked="" type="checkbox"/> Trained, non-professionals – farmers<br><input type="checkbox"/> Uncertain or not -specified                                                              |
| Quality of data                                                                                                                                     | <input type="checkbox"/> Standard recording of raw data<br><input type="checkbox"/> Free recording of raw data<br><input type="checkbox"/> Anecdotic                                                                                                        |
| Analysis                                                                                                                                            | <input type="checkbox"/> Reported, verifiable methodology<br><input type="checkbox"/> Reported, unverifiable methodology<br><input type="checkbox"/> Unknown, unverifiable methodology                                                                      |
| Quality of analysis                                                                                                                                 | <input type="checkbox"/> Scientifically based<br><input type="checkbox"/> Indicative only<br><input type="checkbox"/> Unknown                                                                                                                               |
| <b>REPORTING</b>                                                                                                                                    |                                                                                                                                                                                                                                                             |
| Language                                                                                                                                            | <input type="checkbox"/> Specify reporting language(s): French probably                                                                                                                                                                                     |
| Availability                                                                                                                                        | <input type="checkbox"/> Scientific publication<br><input type="checkbox"/> Official report available on the internet or in other public forum<br><input type="checkbox"/> Official report available from network<br><input type="checkbox"/> Not available |
| Frequency                                                                                                                                           | <input type="checkbox"/> $\geq$ 1 time/year –<br><input type="checkbox"/> < 1 time/year –                                                                                                                                                                   |
| Historical reference                                                                                                                                | <input type="checkbox"/> over $\geq$ 5 years<br><input type="checkbox"/> between 1 and 5 years<br><input type="checkbox"/> no historical analysis                                                                                                           |
| <b>COMMENT(S)</b>                                                                                                                                   |                                                                                                                                                                                                                                                             |
| Biodiversity on farmland will be monitored as well as the influence of agricultural practises on biodiversity. Emphasis on sustainable agriculture. |                                                                                                                                                                                                                                                             |

## GSEN-09-0122.00.1 F – Min of agriculture (plant health)

| EuropaBio's coordinated approach to General Surveillance: Existing Networks |                                                                                                                                                                                                                                                                                                                                                                                                                                  |                                                                                                                                                                                                                                                                                                                                                                                                                                                                                                                   |                                                                                                                                                                                                                                                                                                         |
|-----------------------------------------------------------------------------|----------------------------------------------------------------------------------------------------------------------------------------------------------------------------------------------------------------------------------------------------------------------------------------------------------------------------------------------------------------------------------------------------------------------------------|-------------------------------------------------------------------------------------------------------------------------------------------------------------------------------------------------------------------------------------------------------------------------------------------------------------------------------------------------------------------------------------------------------------------------------------------------------------------------------------------------------------------|---------------------------------------------------------------------------------------------------------------------------------------------------------------------------------------------------------------------------------------------------------------------------------------------------------|
| ORGANISATION                                                                |                                                                                                                                                                                                                                                                                                                                                                                                                                  |                                                                                                                                                                                                                                                                                                                                                                                                                                                                                                                   |                                                                                                                                                                                                                                                                                                         |
| EuropaBio reference                                                         | GS-EN-09-0122                                                                                                                                                                                                                                                                                                                                                                                                                    |                                                                                                                                                                                                                                                                                                                                                                                                                                                                                                                   |                                                                                                                                                                                                                                                                                                         |
| Official name of the Network                                                | <b>Ministère de l'Alimentation, de l'Agriculture et de la Pêche</b><br>Direction générale de l'alimentation (DGAL) + les Services régionaux de la protection des végétaux (SRPV)                                                                                                                                                                                                                                                 |                                                                                                                                                                                                                                                                                                                                                                                                                                                                                                                   |                                                                                                                                                                                                                                                                                                         |
| Other names                                                                 | Ministry of Food, Agriculture and Forests: Regional services for plant protection                                                                                                                                                                                                                                                                                                                                                |                                                                                                                                                                                                                                                                                                                                                                                                                                                                                                                   |                                                                                                                                                                                                                                                                                                         |
| Type of organisation                                                        | Governmental                                                                                                                                                                                                                                                                                                                                                                                                                     |                                                                                                                                                                                                                                                                                                                                                                                                                                                                                                                   |                                                                                                                                                                                                                                                                                                         |
| Coordinates                                                                 | Ministère de l'agriculture et de la pêche<br>78, rue de Varenne<br>75349 Paris 07 SP                                                                                                                                                                                                                                                                                                                                             |                                                                                                                                                                                                                                                                                                                                                                                                                                                                                                                   |                                                                                                                                                                                                                                                                                                         |
| Website                                                                     | <a href="http://agriculture.gouv.fr/sections/thematiques/environnement">http://agriculture.gouv.fr/sections/thematiques/environnement</a><br><a href="http://pv.agriculture.gouv.fr/listesrpv.htm">http://pv.agriculture.gouv.fr/listesrpv.htm</a> email addresses<br><a href="http://www.srpv-centre.com/">http://www.srpv-centre.com/</a><br><a href="http://www.srpv-picardie.com/">http://www.srpv-picardie.com/</a><br>etc. |                                                                                                                                                                                                                                                                                                                                                                                                                                                                                                                   |                                                                                                                                                                                                                                                                                                         |
| Funding                                                                     | public                                                                                                                                                                                                                                                                                                                                                                                                                           |                                                                                                                                                                                                                                                                                                                                                                                                                                                                                                                   |                                                                                                                                                                                                                                                                                                         |
| Conflict of interest                                                        | -                                                                                                                                                                                                                                                                                                                                                                                                                                |                                                                                                                                                                                                                                                                                                                                                                                                                                                                                                                   |                                                                                                                                                                                                                                                                                                         |
| Part of other network(s)                                                    | -                                                                                                                                                                                                                                                                                                                                                                                                                                |                                                                                                                                                                                                                                                                                                                                                                                                                                                                                                                   |                                                                                                                                                                                                                                                                                                         |
| Grouping other network(s)                                                   | -                                                                                                                                                                                                                                                                                                                                                                                                                                |                                                                                                                                                                                                                                                                                                                                                                                                                                                                                                                   |                                                                                                                                                                                                                                                                                                         |
| MONITORING SUBJECT                                                          |                                                                                                                                                                                                                                                                                                                                                                                                                                  |                                                                                                                                                                                                                                                                                                                                                                                                                                                                                                                   |                                                                                                                                                                                                                                                                                                         |
| Description                                                                 | Monitoring plans and control plans to detect early on the presence of organisms harmful to plants and to trigger management measures to eradicate these organisms, or to keep the populations below an acceptable level."                                                                                                                                                                                                        |                                                                                                                                                                                                                                                                                                                                                                                                                                                                                                                   |                                                                                                                                                                                                                                                                                                         |
| Protection goal(s) and/or influencing factor(s)                             | <input checked="" type="checkbox"/> Protection goal<br><input type="checkbox"/> Biodiversity: general<br><input type="checkbox"/> Human Health<br><input type="checkbox"/> Animal Health<br><input checked="" type="checkbox"/> Plant Health<br><input type="checkbox"/> Soil function<br><input type="checkbox"/> Water quality<br><input type="checkbox"/> Sustainable Agriculture                                             | <input checked="" type="checkbox"/> Influencing factor<br><input checked="" type="checkbox"/> Agronomic practice<br><input type="checkbox"/> Plant protection<br><input checked="" type="checkbox"/> GMO cultivation<br><input type="checkbox"/> Environmental conditions                                                                                                                                                                                                                                         |                                                                                                                                                                                                                                                                                                         |
| Duplication of Farmer's questionnaire                                       | <input type="checkbox"/> No duplication<br><input checked="" type="checkbox"/> Partly duplication<br><input type="checkbox"/> Complete duplication                                                                                                                                                                                                                                                                               |                                                                                                                                                                                                                                                                                                                                                                                                                                                                                                                   |                                                                                                                                                                                                                                                                                                         |
| SPECIFICITY                                                                 |                                                                                                                                                                                                                                                                                                                                                                                                                                  |                                                                                                                                                                                                                                                                                                                                                                                                                                                                                                                   |                                                                                                                                                                                                                                                                                                         |
| Geography                                                                   | <input type="checkbox"/> EU -wide<br><input type="checkbox"/> Zone A – North<br><input type="checkbox"/> Zone B – Centre:<br><input type="checkbox"/> Zone C – South                                                                                                                                                                                                                                                             |                                                                                                                                                                                                                                                                                                                                                                                                                                                                                                                   |                                                                                                                                                                                                                                                                                                         |
|                                                                             | <input type="checkbox"/> Denmark,<br><input type="checkbox"/> Estonia,<br><input type="checkbox"/> Latvia,<br><input type="checkbox"/> Lithuania,<br><input type="checkbox"/> Finland,<br><input type="checkbox"/> Sweden                                                                                                                                                                                                        | <input type="checkbox"/> Belgium,<br><input type="checkbox"/> Czech Republic<br><input type="checkbox"/> Germany,<br><input type="checkbox"/> Ireland,<br><input type="checkbox"/> Luxembourg,<br><input type="checkbox"/> Hungary,<br><input type="checkbox"/> Netherlands,<br><input type="checkbox"/> Austria,<br><input type="checkbox"/> Poland,<br><input type="checkbox"/> Romania,<br><input type="checkbox"/> Slovenia,<br><input type="checkbox"/> Slovakia,<br><input type="checkbox"/> United Kingdom | <input type="checkbox"/> Bulgaria,<br><input type="checkbox"/> Greece,<br><input type="checkbox"/> Spain,<br><input checked="" type="checkbox"/> France,<br><input type="checkbox"/> Italy,<br><input type="checkbox"/> Cyprus,<br><input type="checkbox"/> Malta,<br><input type="checkbox"/> Portugal |
|                                                                             | <input type="checkbox"/> Regional (specify)<br><input type="checkbox"/> Local (specify)                                                                                                                                                                                                                                                                                                                                          |                                                                                                                                                                                                                                                                                                                                                                                                                                                                                                                   |                                                                                                                                                                                                                                                                                                         |
| Factors                                                                     | <input checked="" type="checkbox"/> Multiple species/items (specify): several plant pests and diseases<br><input type="checkbox"/> Single species/item (specify)                                                                                                                                                                                                                                                                 |                                                                                                                                                                                                                                                                                                                                                                                                                                                                                                                   |                                                                                                                                                                                                                                                                                                         |
| Crop                                                                        | <input type="checkbox"/> No specific crop(s)<br><input type="checkbox"/> Several crops (e.g. all cereals)<br><input type="checkbox"/> Single crop                                                                                                                                                                                                                                                                                |                                                                                                                                                                                                                                                                                                                                                                                                                                                                                                                   |                                                                                                                                                                                                                                                                                                         |
| Trait /treatment                                                            | <input type="checkbox"/> No specific traits/treatments<br><input type="checkbox"/> Several traits/treatments<br><input type="checkbox"/> Single trait/treatment                                                                                                                                                                                                                                                                  |                                                                                                                                                                                                                                                                                                                                                                                                                                                                                                                   |                                                                                                                                                                                                                                                                                                         |

|                                               |                                                                                                                                                                                                                                                                        |
|-----------------------------------------------|------------------------------------------------------------------------------------------------------------------------------------------------------------------------------------------------------------------------------------------------------------------------|
| GMO                                           | <input checked="" type="checkbox"/> No GMO bias<br><input type="checkbox"/> GMO specific                                                                                                                                                                               |
| <b>METHODOLOGY</b>                            |                                                                                                                                                                                                                                                                        |
| Observations                                  | <input type="checkbox"/> Reported, verifiable methodology<br><input type="checkbox"/> Reported, unverifiable methodology<br><input type="checkbox"/> Unknown, unverifiable methodology                                                                                 |
| Frequency                                     | <input type="checkbox"/> > 1 time/year<br><input checked="" type="checkbox"/> 1 time/year:<br><input checked="" type="checkbox"/> < 1 time/year                                                                                                                        |
| Future                                        | <input type="checkbox"/> For ≥ 5 years<br><input type="checkbox"/> between 1 and 5 years<br><input type="checkbox"/> no prospect                                                                                                                                       |
| Quality of performers                         | <input checked="" type="checkbox"/> Trained, professionals<br><input type="checkbox"/> Trained, non-professionals – farmers<br><input type="checkbox"/> Uncertain or not -specified                                                                                    |
| Quality of data                               | <input type="checkbox"/> Standard recording of raw data<br><input type="checkbox"/> Free recording of raw data<br><input type="checkbox"/> Anecdotic                                                                                                                   |
| Analysis                                      | <input type="checkbox"/> Reported, verifiable methodology<br><input type="checkbox"/> Reported, unverifiable methodology<br><input type="checkbox"/> Unknown, unverifiable methodology                                                                                 |
| Quality of analysis                           | <input type="checkbox"/> Scientifically based<br><input type="checkbox"/> Indicative only<br><input type="checkbox"/> Unknown                                                                                                                                          |
| <b>REPORTING</b>                              |                                                                                                                                                                                                                                                                        |
| Language                                      | <input type="checkbox"/> Specify reporting language(s): French                                                                                                                                                                                                         |
| Availability                                  | <input type="checkbox"/> Scientific publication<br><input checked="" type="checkbox"/> Official report available on the internet or in other public forum<br><input type="checkbox"/> Official report available from network<br><input type="checkbox"/> Not available |
| Frequency                                     | <input checked="" type="checkbox"/> ≥ 1 time/year – GMO surveillance<br><input checked="" type="checkbox"/> < 1 time/year – on pests and diseases                                                                                                                      |
| Historical reference                          | <input checked="" type="checkbox"/> over ≥ 5 years<br><input checked="" type="checkbox"/> between 1 and 5 years<br><input type="checkbox"/> no historical analysis                                                                                                     |
| <b>COMMENT(S)</b>                             |                                                                                                                                                                                                                                                                        |
| Pests and diseases on farmland are monitored. |                                                                                                                                                                                                                                                                        |

## GSEN-09-0131.00.1 F – Vigie-Nature

| EuropaBio's coordinated approach to General Surveillance: Existing Networks |                                                                                                                                                                                                                                                                                                                               |                                                                                                                                                                                                                                                                                                                                                                                                                                                                                                                   |                                                                                                                                                                                                                                                                                                         |
|-----------------------------------------------------------------------------|-------------------------------------------------------------------------------------------------------------------------------------------------------------------------------------------------------------------------------------------------------------------------------------------------------------------------------|-------------------------------------------------------------------------------------------------------------------------------------------------------------------------------------------------------------------------------------------------------------------------------------------------------------------------------------------------------------------------------------------------------------------------------------------------------------------------------------------------------------------|---------------------------------------------------------------------------------------------------------------------------------------------------------------------------------------------------------------------------------------------------------------------------------------------------------|
| ORGANISATION                                                                |                                                                                                                                                                                                                                                                                                                               |                                                                                                                                                                                                                                                                                                                                                                                                                                                                                                                   |                                                                                                                                                                                                                                                                                                         |
| EuropaBio reference                                                         | GS-EN-09-0131                                                                                                                                                                                                                                                                                                                 |                                                                                                                                                                                                                                                                                                                                                                                                                                                                                                                   |                                                                                                                                                                                                                                                                                                         |
| Official name of the Network                                                | <b>Muséum national d'Histoire naturelle<br/>Vigie-Nature (Département: Ecologie et Gestion de la Biodiversité)</b>                                                                                                                                                                                                            |                                                                                                                                                                                                                                                                                                                                                                                                                                                                                                                   |                                                                                                                                                                                                                                                                                                         |
| Other names                                                                 | Natural Science Museum: Vigie-nature                                                                                                                                                                                                                                                                                          |                                                                                                                                                                                                                                                                                                                                                                                                                                                                                                                   |                                                                                                                                                                                                                                                                                                         |
| Type of organisation                                                        | Governmental                                                                                                                                                                                                                                                                                                                  |                                                                                                                                                                                                                                                                                                                                                                                                                                                                                                                   |                                                                                                                                                                                                                                                                                                         |
| Coordinates                                                                 | Muséum national d'Histoire naturelle<br>57 rue Cuvier<br>75005 Paris<br><br>Unité Conservation des Espèces, Restauration et Suivi des Populations<br>55 rue Buffon<br>75005 Paris<br>fax : 01.40.79.38.35                                                                                                                     |                                                                                                                                                                                                                                                                                                                                                                                                                                                                                                                   |                                                                                                                                                                                                                                                                                                         |
| Website                                                                     | <a href="http://www.mnhn.fr/">http://www.mnhn.fr/</a><br><a href="http://www2.mnhn.fr/vigie-nature/spip.php?rubrique1">http://www2.mnhn.fr/vigie-nature/spip.php?rubrique1</a><br><a href="http://www.vigie-flore.fr/">http://www.vigie-flore.fr/</a>                                                                         |                                                                                                                                                                                                                                                                                                                                                                                                                                                                                                                   |                                                                                                                                                                                                                                                                                                         |
| Funding                                                                     | public                                                                                                                                                                                                                                                                                                                        |                                                                                                                                                                                                                                                                                                                                                                                                                                                                                                                   |                                                                                                                                                                                                                                                                                                         |
| Conflict of interest                                                        | -                                                                                                                                                                                                                                                                                                                             |                                                                                                                                                                                                                                                                                                                                                                                                                                                                                                                   |                                                                                                                                                                                                                                                                                                         |
| Part of other network(s)                                                    | -                                                                                                                                                                                                                                                                                                                             |                                                                                                                                                                                                                                                                                                                                                                                                                                                                                                                   |                                                                                                                                                                                                                                                                                                         |
| Grouping other network(s)                                                   | Cooperation with local nature associations                                                                                                                                                                                                                                                                                    |                                                                                                                                                                                                                                                                                                                                                                                                                                                                                                                   |                                                                                                                                                                                                                                                                                                         |
| MONITORING SUBJECT                                                          |                                                                                                                                                                                                                                                                                                                               |                                                                                                                                                                                                                                                                                                                                                                                                                                                                                                                   |                                                                                                                                                                                                                                                                                                         |
| Description                                                                 | Monitoring biodiversity using indicator species.                                                                                                                                                                                                                                                                              |                                                                                                                                                                                                                                                                                                                                                                                                                                                                                                                   |                                                                                                                                                                                                                                                                                                         |
| Protection goal(s) and/or influencing factor(s)                             | <input checked="" type="checkbox"/> Protection goal                                                                                                                                                                                                                                                                           | <input type="checkbox"/> Influencing factor                                                                                                                                                                                                                                                                                                                                                                                                                                                                       |                                                                                                                                                                                                                                                                                                         |
|                                                                             | <input checked="" type="checkbox"/> Biodiversity: general<br><input type="checkbox"/> Human Health<br><input type="checkbox"/> Animal Health<br><input type="checkbox"/> Plant Health<br><input type="checkbox"/> Soil function<br><input type="checkbox"/> Water quality<br><input type="checkbox"/> Sustainable Agriculture | <input type="checkbox"/> Agronomic practice<br><input type="checkbox"/> Plant protection<br><input type="checkbox"/> GMO cultivation<br><input type="checkbox"/> Environmental conditions                                                                                                                                                                                                                                                                                                                         |                                                                                                                                                                                                                                                                                                         |
| Duplication of Farmer's questionnaire                                       | <input checked="" type="checkbox"/> No duplication<br><input type="checkbox"/> Partly duplication<br><input type="checkbox"/> Complete duplication                                                                                                                                                                            |                                                                                                                                                                                                                                                                                                                                                                                                                                                                                                                   |                                                                                                                                                                                                                                                                                                         |
| SPECIFICITY                                                                 |                                                                                                                                                                                                                                                                                                                               |                                                                                                                                                                                                                                                                                                                                                                                                                                                                                                                   |                                                                                                                                                                                                                                                                                                         |
| Geography                                                                   | <input type="checkbox"/> EU –wide                                                                                                                                                                                                                                                                                             |                                                                                                                                                                                                                                                                                                                                                                                                                                                                                                                   |                                                                                                                                                                                                                                                                                                         |
|                                                                             | <input type="checkbox"/> Zone A – North                                                                                                                                                                                                                                                                                       | <input type="checkbox"/> Zone B – Centre:                                                                                                                                                                                                                                                                                                                                                                                                                                                                         | <input type="checkbox"/> Zone C – South                                                                                                                                                                                                                                                                 |
|                                                                             | <input type="checkbox"/> Denmark,<br><input type="checkbox"/> Estonia,<br><input type="checkbox"/> Latvia,<br><input type="checkbox"/> Lithuania,<br><input type="checkbox"/> Finland,<br><input type="checkbox"/> Sweden                                                                                                     | <input type="checkbox"/> Belgium,<br><input type="checkbox"/> Czech Republic<br><input type="checkbox"/> Germany,<br><input type="checkbox"/> Ireland,<br><input type="checkbox"/> Luxembourg,<br><input type="checkbox"/> Hungary,<br><input type="checkbox"/> Netherlands,<br><input type="checkbox"/> Austria,<br><input type="checkbox"/> Poland,<br><input type="checkbox"/> Romania,<br><input type="checkbox"/> Slovenia,<br><input type="checkbox"/> Slovakia,<br><input type="checkbox"/> United Kingdom | <input type="checkbox"/> Bulgaria,<br><input type="checkbox"/> Greece,<br><input type="checkbox"/> Spain,<br><input checked="" type="checkbox"/> France,<br><input type="checkbox"/> Italy,<br><input type="checkbox"/> Cyprus,<br><input type="checkbox"/> Malta,<br><input type="checkbox"/> Portugal |
|                                                                             | <input type="checkbox"/> Regional (specify)<br><input type="checkbox"/> Local (specify)                                                                                                                                                                                                                                       |                                                                                                                                                                                                                                                                                                                                                                                                                                                                                                                   |                                                                                                                                                                                                                                                                                                         |
| Factors                                                                     | <input checked="" type="checkbox"/> Multiple species/items (specify): birds, bats, butterflies, snails, plants<br><input type="checkbox"/> Single species/item (specify)                                                                                                                                                      |                                                                                                                                                                                                                                                                                                                                                                                                                                                                                                                   |                                                                                                                                                                                                                                                                                                         |
| Crop                                                                        | <input type="checkbox"/> No specific crop(s)<br><input type="checkbox"/> Several crops (e.g. all cereals)<br><input type="checkbox"/> Single crop                                                                                                                                                                             |                                                                                                                                                                                                                                                                                                                                                                                                                                                                                                                   |                                                                                                                                                                                                                                                                                                         |
| Trait /treatment                                                            | <input type="checkbox"/> No specific traits/treatments<br><input type="checkbox"/> Several traits/treatments<br><input type="checkbox"/> Single trait/treatment                                                                                                                                                               |                                                                                                                                                                                                                                                                                                                                                                                                                                                                                                                   |                                                                                                                                                                                                                                                                                                         |

|                                                                                                                                          |                                                                                                                                                                                                                                                                                                      |
|------------------------------------------------------------------------------------------------------------------------------------------|------------------------------------------------------------------------------------------------------------------------------------------------------------------------------------------------------------------------------------------------------------------------------------------------------|
| GMO                                                                                                                                      | <input checked="" type="checkbox"/> No GMO bias<br><input type="checkbox"/> GMO specific                                                                                                                                                                                                             |
| <b>METHODOLOGY</b>                                                                                                                       |                                                                                                                                                                                                                                                                                                      |
| Observations                                                                                                                             | <input checked="" type="checkbox"/> Reported, verifiable methodology<br><input type="checkbox"/> Reported, unverifiable methodology<br><input type="checkbox"/> Unknown, unverifiable methodology                                                                                                    |
| Frequency                                                                                                                                | <input checked="" type="checkbox"/> > 1 time/year: birds<br><input checked="" type="checkbox"/> 1 time/year:<br><input type="checkbox"/> < 1 time/year                                                                                                                                               |
| Future                                                                                                                                   | <input checked="" type="checkbox"/> For $\geq$ 5 years<br><input type="checkbox"/> between 1 and 5 years<br><input type="checkbox"/> no prospect                                                                                                                                                     |
| Quality of performers                                                                                                                    | <input type="checkbox"/> Trained, professionals<br><input checked="" type="checkbox"/> Trained, non-professionals – training by documentation, volunteers<br><input type="checkbox"/> Uncertain or not –specified                                                                                    |
| Quality of data                                                                                                                          | <input checked="" type="checkbox"/> Standard recording of raw data<br><input type="checkbox"/> Free recording of raw data<br><input type="checkbox"/> Anecdotic                                                                                                                                      |
| Analysis                                                                                                                                 | <input checked="" type="checkbox"/> Reported, verifiable methodology<br><input type="checkbox"/> Reported, unverifiable methodology<br><input type="checkbox"/> Unknown, unverifiable methodology                                                                                                    |
| Quality of analysis                                                                                                                      | <input checked="" type="checkbox"/> Scientifically based<br><input type="checkbox"/> Indicative only<br><input type="checkbox"/> Unknown                                                                                                                                                             |
| <b>REPORTING</b>                                                                                                                         |                                                                                                                                                                                                                                                                                                      |
| Language                                                                                                                                 | <input checked="" type="checkbox"/> Specify reporting language(s): French or English                                                                                                                                                                                                                 |
| Availability                                                                                                                             | <input checked="" type="checkbox"/> Scientific publication<br><input checked="" type="checkbox"/> Official report available on the internet or in other public forum: graphs on website<br><input type="checkbox"/> Official report available from network<br><input type="checkbox"/> Not available |
| Frequency                                                                                                                                | <input checked="" type="checkbox"/> $\geq$ 1 time/year –<br><input type="checkbox"/> < 1 time/year –                                                                                                                                                                                                 |
| Historical reference                                                                                                                     | <input checked="" type="checkbox"/> over $\geq$ 5 years: for birds.<br><input checked="" type="checkbox"/> between 1 and 5 years: for bats and butterflies.<br><input checked="" type="checkbox"/> no historical analysis: for snails and plants.                                                    |
| <b>COMMENT(S)</b>                                                                                                                        |                                                                                                                                                                                                                                                                                                      |
| Program to monitor the health of ordinary nature through biodiversity indicator groups (birds, butterflies, bats, plants and amphibians) |                                                                                                                                                                                                                                                                                                      |

## GSEN-09-0132.00.1 F – MNHN - national inventory

| EuropaBio's coordinated approach to General Surveillance: Existing Networks |                                                                                                                                                                                                                                                                                                                                                                                          |                                                                                                                                                                                                                                                                                                                                                                                                                                                                                                                   |                                                                                                                                                                                                                                                                                                         |
|-----------------------------------------------------------------------------|------------------------------------------------------------------------------------------------------------------------------------------------------------------------------------------------------------------------------------------------------------------------------------------------------------------------------------------------------------------------------------------|-------------------------------------------------------------------------------------------------------------------------------------------------------------------------------------------------------------------------------------------------------------------------------------------------------------------------------------------------------------------------------------------------------------------------------------------------------------------------------------------------------------------|---------------------------------------------------------------------------------------------------------------------------------------------------------------------------------------------------------------------------------------------------------------------------------------------------------|
| ORGANISATION                                                                |                                                                                                                                                                                                                                                                                                                                                                                          |                                                                                                                                                                                                                                                                                                                                                                                                                                                                                                                   |                                                                                                                                                                                                                                                                                                         |
| EuropaBio reference                                                         | GS-EN-09-0132                                                                                                                                                                                                                                                                                                                                                                            |                                                                                                                                                                                                                                                                                                                                                                                                                                                                                                                   |                                                                                                                                                                                                                                                                                                         |
| Official name of the Network                                                | Muséum national d'Histoire naturelle<br>Inventaire National du Patrimoine naturel<br>Conservatoires Botaniques Nationaux (CBN)                                                                                                                                                                                                                                                           |                                                                                                                                                                                                                                                                                                                                                                                                                                                                                                                   |                                                                                                                                                                                                                                                                                                         |
| Other names                                                                 | Natural Science Museum: National inventory of the natural heritage                                                                                                                                                                                                                                                                                                                       |                                                                                                                                                                                                                                                                                                                                                                                                                                                                                                                   |                                                                                                                                                                                                                                                                                                         |
| Type of organisation                                                        | Governmental                                                                                                                                                                                                                                                                                                                                                                             |                                                                                                                                                                                                                                                                                                                                                                                                                                                                                                                   |                                                                                                                                                                                                                                                                                                         |
| Coordinates                                                                 | Muséum national d'Histoire naturelle<br>57 rue Cuvier<br>75005 Paris<br><br>Siège administratif<br>CBN Midi-Pyrénées<br>Vallon de Salut<br>BP 315<br>65203 Bagnères de Bigorre Cedex<br><a href="mailto:federation.cbn@laposte.net">federation.cbn[at]laposte.net</a>                                                                                                                    |                                                                                                                                                                                                                                                                                                                                                                                                                                                                                                                   |                                                                                                                                                                                                                                                                                                         |
| Website                                                                     | <a href="http://inpn.mnhn.fr/inpn/fr/partenaires/CBN.htm">http://inpn.mnhn.fr/inpn/fr/partenaires/CBN.htm</a>                                                                                                                                                                                                                                                                            |                                                                                                                                                                                                                                                                                                                                                                                                                                                                                                                   |                                                                                                                                                                                                                                                                                                         |
| Funding                                                                     | public                                                                                                                                                                                                                                                                                                                                                                                   |                                                                                                                                                                                                                                                                                                                                                                                                                                                                                                                   |                                                                                                                                                                                                                                                                                                         |
| Conflict of interest                                                        | -                                                                                                                                                                                                                                                                                                                                                                                        |                                                                                                                                                                                                                                                                                                                                                                                                                                                                                                                   |                                                                                                                                                                                                                                                                                                         |
| Part of other network(s)                                                    | -                                                                                                                                                                                                                                                                                                                                                                                        |                                                                                                                                                                                                                                                                                                                                                                                                                                                                                                                   |                                                                                                                                                                                                                                                                                                         |
| Grouping other network(s)                                                   | All National Botanical Conservatories and others                                                                                                                                                                                                                                                                                                                                         |                                                                                                                                                                                                                                                                                                                                                                                                                                                                                                                   |                                                                                                                                                                                                                                                                                                         |
| MONITORING SUBJECT                                                          |                                                                                                                                                                                                                                                                                                                                                                                          |                                                                                                                                                                                                                                                                                                                                                                                                                                                                                                                   |                                                                                                                                                                                                                                                                                                         |
| Description                                                                 | Monitoring endangered species and programs to protect <i>in situ</i> and <i>ex situ</i> .                                                                                                                                                                                                                                                                                                |                                                                                                                                                                                                                                                                                                                                                                                                                                                                                                                   |                                                                                                                                                                                                                                                                                                         |
| Protection goal(s) and/or influencing factor(s)                             | <input checked="" type="checkbox"/> Protection goal<br><br><input checked="" type="checkbox"/> Biodiversity: general<br><input type="checkbox"/> Human Health<br><input type="checkbox"/> Animal Health<br><input type="checkbox"/> Plant Health<br><input type="checkbox"/> Soil function<br><input type="checkbox"/> Water quality<br><input type="checkbox"/> Sustainable Agriculture | <input type="checkbox"/> Influencing factor<br><br><input type="checkbox"/> Agronomic practice<br><input type="checkbox"/> Plant protection<br><input type="checkbox"/> GMO cultivation<br><input type="checkbox"/> Environmental conditions                                                                                                                                                                                                                                                                      |                                                                                                                                                                                                                                                                                                         |
| Duplication of Farmer's questionnaire                                       | <input checked="" type="checkbox"/> No duplication<br><input type="checkbox"/> Partly duplication<br><input type="checkbox"/> Complete duplication                                                                                                                                                                                                                                       |                                                                                                                                                                                                                                                                                                                                                                                                                                                                                                                   |                                                                                                                                                                                                                                                                                                         |
| SPECIFICITY                                                                 |                                                                                                                                                                                                                                                                                                                                                                                          |                                                                                                                                                                                                                                                                                                                                                                                                                                                                                                                   |                                                                                                                                                                                                                                                                                                         |
| Geography                                                                   | <input type="checkbox"/> EU –wide<br><br><input type="checkbox"/> Zone A – North<br><input type="checkbox"/> Zone B – Centre:<br><input type="checkbox"/> Zone C – South                                                                                                                                                                                                                 |                                                                                                                                                                                                                                                                                                                                                                                                                                                                                                                   |                                                                                                                                                                                                                                                                                                         |
|                                                                             | <input type="checkbox"/> Denmark,<br><input type="checkbox"/> Estonia,<br><input type="checkbox"/> Latvia,<br><input type="checkbox"/> Lithuania,<br><input type="checkbox"/> Finland,<br><input type="checkbox"/> Sweden                                                                                                                                                                | <input type="checkbox"/> Belgium,<br><input type="checkbox"/> Czech Republic<br><input type="checkbox"/> Germany,<br><input type="checkbox"/> Ireland,<br><input type="checkbox"/> Luxembourg,<br><input type="checkbox"/> Hungary,<br><input type="checkbox"/> Netherlands,<br><input type="checkbox"/> Austria,<br><input type="checkbox"/> Poland,<br><input type="checkbox"/> Romania,<br><input type="checkbox"/> Slovenia,<br><input type="checkbox"/> Slovakia,<br><input type="checkbox"/> United Kingdom | <input type="checkbox"/> Bulgaria,<br><input type="checkbox"/> Greece,<br><input type="checkbox"/> Spain,<br><input checked="" type="checkbox"/> France,<br><input type="checkbox"/> Italy,<br><input type="checkbox"/> Cyprus,<br><input type="checkbox"/> Malta,<br><input type="checkbox"/> Portugal |
|                                                                             | <input type="checkbox"/> Regional (specify)<br><input type="checkbox"/> Local (specify)                                                                                                                                                                                                                                                                                                  |                                                                                                                                                                                                                                                                                                                                                                                                                                                                                                                   |                                                                                                                                                                                                                                                                                                         |
| Factors                                                                     | <input checked="" type="checkbox"/> Multiple species/items (specify): endangered plant species<br><input type="checkbox"/> Single species/item (specify)                                                                                                                                                                                                                                 |                                                                                                                                                                                                                                                                                                                                                                                                                                                                                                                   |                                                                                                                                                                                                                                                                                                         |
| Crop                                                                        | <input type="checkbox"/> No specific crop(s)<br><input type="checkbox"/> Several crops (e.g. all cereals)<br><input type="checkbox"/> Single crop                                                                                                                                                                                                                                        |                                                                                                                                                                                                                                                                                                                                                                                                                                                                                                                   |                                                                                                                                                                                                                                                                                                         |
| Trait /treatment                                                            | <input type="checkbox"/> No specific traits/treatments<br><input type="checkbox"/> Several traits/treatments<br><input type="checkbox"/> Single trait/treatment                                                                                                                                                                                                                          |                                                                                                                                                                                                                                                                                                                                                                                                                                                                                                                   |                                                                                                                                                                                                                                                                                                         |

|                                        |                                                                                                                                                                                                                                                                                |
|----------------------------------------|--------------------------------------------------------------------------------------------------------------------------------------------------------------------------------------------------------------------------------------------------------------------------------|
| GMO                                    | <input checked="" type="checkbox"/> No GMO bias<br><input type="checkbox"/> GMO specific                                                                                                                                                                                       |
| <b>METHODOLOGY</b>                     |                                                                                                                                                                                                                                                                                |
| Observations                           | <input type="checkbox"/> Reported, verifiable methodology<br><input type="checkbox"/> Reported, unverifiable methodology<br><input checked="" type="checkbox"/> Unknown, unverifiable methodology                                                                              |
| Frequency                              | <input type="checkbox"/> > 1 time/year:<br><input type="checkbox"/> 1 time/year:<br><input type="checkbox"/> < 1 time/year                                                                                                                                                     |
| Future                                 | <input checked="" type="checkbox"/> For ≥ 5 years<br><input type="checkbox"/> between 1 and 5 years<br><input type="checkbox"/> no prospect                                                                                                                                    |
| Quality of performers                  | <input checked="" type="checkbox"/> Trained, professionals<br><input type="checkbox"/> Trained, non-professionals<br><input type="checkbox"/> Uncertain or not –specified                                                                                                      |
| Quality of data                        | <input type="checkbox"/> Standard recording of raw data<br><input type="checkbox"/> Free recording of raw data<br><input type="checkbox"/> Anecdotic                                                                                                                           |
| Analysis                               | <input type="checkbox"/> Reported, verifiable methodology<br><input type="checkbox"/> Reported, unverifiable methodology<br><input type="checkbox"/> Unknown, unverifiable methodology                                                                                         |
| Quality of analysis                    | <input type="checkbox"/> Scientifically based<br><input type="checkbox"/> Indicative only<br><input type="checkbox"/> Unknown                                                                                                                                                  |
| <b>REPORTING</b>                       |                                                                                                                                                                                                                                                                                |
| Language                               | <input checked="" type="checkbox"/> Specify reporting language(s): French                                                                                                                                                                                                      |
| Availability                           | <input type="checkbox"/> Scientific publication<br><input type="checkbox"/> Official report available on the internet or in other public forum: graphs on website<br><input type="checkbox"/> Official report available from network<br><input type="checkbox"/> Not available |
| Frequency                              | <input type="checkbox"/> ≥ 1 time/year –<br><input type="checkbox"/> < 1 time/year –                                                                                                                                                                                           |
| Historical reference                   | <input type="checkbox"/> over ≥ 5 years:<br><input type="checkbox"/> between 1 and 5 years:<br><input type="checkbox"/> no historical analysis:                                                                                                                                |
| <b>COMMENT(S)</b>                      |                                                                                                                                                                                                                                                                                |
| Limited publicly available information |                                                                                                                                                                                                                                                                                |

## GSEN-09-0133.00.1 F – MNHN - CRBPO

| EuropaBio's coordinated approach to General Surveillance: Existing Networks |                                                                                                                                                                                                                                                                                                                             |                                                                                                                                                                                                                                                                                                                                                                                                                                                                                                                   |                                                                                                                                                                                                                                                                                                         |
|-----------------------------------------------------------------------------|-----------------------------------------------------------------------------------------------------------------------------------------------------------------------------------------------------------------------------------------------------------------------------------------------------------------------------|-------------------------------------------------------------------------------------------------------------------------------------------------------------------------------------------------------------------------------------------------------------------------------------------------------------------------------------------------------------------------------------------------------------------------------------------------------------------------------------------------------------------|---------------------------------------------------------------------------------------------------------------------------------------------------------------------------------------------------------------------------------------------------------------------------------------------------------|
| ORGANISATION                                                                |                                                                                                                                                                                                                                                                                                                             |                                                                                                                                                                                                                                                                                                                                                                                                                                                                                                                   |                                                                                                                                                                                                                                                                                                         |
| EuropaBio reference                                                         | GS-EN-09-0133                                                                                                                                                                                                                                                                                                               |                                                                                                                                                                                                                                                                                                                                                                                                                                                                                                                   |                                                                                                                                                                                                                                                                                                         |
| Official name of the Network                                                | <b>Muséum national d'Histoire naturelle<br/>Centre de Recherches par le Bagueage des Populations d'Oiseaux<br/>(CRBPO)</b>                                                                                                                                                                                                  |                                                                                                                                                                                                                                                                                                                                                                                                                                                                                                                   |                                                                                                                                                                                                                                                                                                         |
| Other names                                                                 | Research Centre for Ringing Bird Populations                                                                                                                                                                                                                                                                                |                                                                                                                                                                                                                                                                                                                                                                                                                                                                                                                   |                                                                                                                                                                                                                                                                                                         |
| Type of organisation                                                        | Governmental<br>Founded 1923                                                                                                                                                                                                                                                                                                |                                                                                                                                                                                                                                                                                                                                                                                                                                                                                                                   |                                                                                                                                                                                                                                                                                                         |
| Coordinates                                                                 | Muséum national d'Histoire naturelle<br>C.R.B.P.O<br>55 rue Buffon<br>75005 Paris<br><br>Fax: 01.40.79.38.35<br>Email: crbpo[at]mnhn.fr                                                                                                                                                                                     |                                                                                                                                                                                                                                                                                                                                                                                                                                                                                                                   |                                                                                                                                                                                                                                                                                                         |
| Website                                                                     | <a href="http://www2.mnhn.fr/crbpo/">http://www2.mnhn.fr/crbpo/</a>                                                                                                                                                                                                                                                         |                                                                                                                                                                                                                                                                                                                                                                                                                                                                                                                   |                                                                                                                                                                                                                                                                                                         |
| Funding                                                                     | public                                                                                                                                                                                                                                                                                                                      |                                                                                                                                                                                                                                                                                                                                                                                                                                                                                                                   |                                                                                                                                                                                                                                                                                                         |
| Conflict of interest                                                        | -                                                                                                                                                                                                                                                                                                                           |                                                                                                                                                                                                                                                                                                                                                                                                                                                                                                                   |                                                                                                                                                                                                                                                                                                         |
| Part of other network(s)                                                    | - Member of EURING<br>- in collaboration with the Muséum national d'Histoire naturelle, the Service du Patrimoine Naturel, CNRS, universities                                                                                                                                                                               |                                                                                                                                                                                                                                                                                                                                                                                                                                                                                                                   |                                                                                                                                                                                                                                                                                                         |
| Grouping other network(s)                                                   | Local organisations                                                                                                                                                                                                                                                                                                         |                                                                                                                                                                                                                                                                                                                                                                                                                                                                                                                   |                                                                                                                                                                                                                                                                                                         |
| MONITORING SUBJECT                                                          |                                                                                                                                                                                                                                                                                                                             |                                                                                                                                                                                                                                                                                                                                                                                                                                                                                                                   |                                                                                                                                                                                                                                                                                                         |
| Description                                                                 | Monitoring endangered and migratory bird species by ringing.                                                                                                                                                                                                                                                                |                                                                                                                                                                                                                                                                                                                                                                                                                                                                                                                   |                                                                                                                                                                                                                                                                                                         |
| Protection goal(s) and/or influencing factor(s)                             | <input checked="" type="checkbox"/> Protection goal                                                                                                                                                                                                                                                                         | <input type="checkbox"/> Influencing factor                                                                                                                                                                                                                                                                                                                                                                                                                                                                       |                                                                                                                                                                                                                                                                                                         |
|                                                                             | <input checked="" type="checkbox"/> Biodiversity: birds<br><input type="checkbox"/> Human Health<br><input type="checkbox"/> Animal Health<br><input type="checkbox"/> Plant Health<br><input type="checkbox"/> Soil function<br><input type="checkbox"/> Water quality<br><input type="checkbox"/> Sustainable Agriculture | <input type="checkbox"/> Agronomic practice<br><input type="checkbox"/> Plant protection<br><input type="checkbox"/> GMO cultivation<br><input type="checkbox"/> Environmental conditions                                                                                                                                                                                                                                                                                                                         |                                                                                                                                                                                                                                                                                                         |
| Duplication of Farmer's questionnaire                                       | <input checked="" type="checkbox"/> No duplication<br><input type="checkbox"/> Partly duplication<br><input type="checkbox"/> Complete duplication                                                                                                                                                                          |                                                                                                                                                                                                                                                                                                                                                                                                                                                                                                                   |                                                                                                                                                                                                                                                                                                         |
| SPECIFICITY                                                                 |                                                                                                                                                                                                                                                                                                                             |                                                                                                                                                                                                                                                                                                                                                                                                                                                                                                                   |                                                                                                                                                                                                                                                                                                         |
| Geography                                                                   | <input type="checkbox"/> EU –wide                                                                                                                                                                                                                                                                                           |                                                                                                                                                                                                                                                                                                                                                                                                                                                                                                                   |                                                                                                                                                                                                                                                                                                         |
|                                                                             | <input type="checkbox"/> Zone A – North                                                                                                                                                                                                                                                                                     | <input type="checkbox"/> Zone B – Centre:                                                                                                                                                                                                                                                                                                                                                                                                                                                                         | <input type="checkbox"/> Zone C – South                                                                                                                                                                                                                                                                 |
|                                                                             | <input type="checkbox"/> Denmark,<br><input type="checkbox"/> Estonia,<br><input type="checkbox"/> Latvia,<br><input type="checkbox"/> Lithuania,<br><input type="checkbox"/> Finland,<br><input type="checkbox"/> Sweden                                                                                                   | <input type="checkbox"/> Belgium,<br><input type="checkbox"/> Czech Republic<br><input type="checkbox"/> Germany,<br><input type="checkbox"/> Ireland,<br><input type="checkbox"/> Luxembourg,<br><input type="checkbox"/> Hungary,<br><input type="checkbox"/> Netherlands,<br><input type="checkbox"/> Austria,<br><input type="checkbox"/> Poland,<br><input type="checkbox"/> Romania,<br><input type="checkbox"/> Slovenia,<br><input type="checkbox"/> Slovakia,<br><input type="checkbox"/> United Kingdom | <input type="checkbox"/> Bulgaria,<br><input type="checkbox"/> Greece,<br><input type="checkbox"/> Spain,<br><input checked="" type="checkbox"/> France,<br><input type="checkbox"/> Italy,<br><input type="checkbox"/> Cyprus,<br><input type="checkbox"/> Malta,<br><input type="checkbox"/> Portugal |
|                                                                             | <input type="checkbox"/> Regional (specify)<br><input type="checkbox"/> Local (specify)                                                                                                                                                                                                                                     |                                                                                                                                                                                                                                                                                                                                                                                                                                                                                                                   |                                                                                                                                                                                                                                                                                                         |
| Factors                                                                     | <input checked="" type="checkbox"/> Multiple species/items (specify): endangered / migratory birds<br><input type="checkbox"/> Single species/item (specify)                                                                                                                                                                |                                                                                                                                                                                                                                                                                                                                                                                                                                                                                                                   |                                                                                                                                                                                                                                                                                                         |
| Crop                                                                        | <input type="checkbox"/> No specific crop(s)<br><input type="checkbox"/> Several crops (e.g. all cereals)<br><input type="checkbox"/> Single crop                                                                                                                                                                           |                                                                                                                                                                                                                                                                                                                                                                                                                                                                                                                   |                                                                                                                                                                                                                                                                                                         |
| Trait /treatment                                                            | <input type="checkbox"/> No specific traits/treatments<br><input type="checkbox"/> Several traits/treatments<br><input type="checkbox"/> Single trait/treatment                                                                                                                                                             |                                                                                                                                                                                                                                                                                                                                                                                                                                                                                                                   |                                                                                                                                                                                                                                                                                                         |



|                                                                                                   |                                                                                                                                                                                                                                                                                |
|---------------------------------------------------------------------------------------------------|--------------------------------------------------------------------------------------------------------------------------------------------------------------------------------------------------------------------------------------------------------------------------------|
| GMO                                                                                               | <input checked="" type="checkbox"/> No GMO bias<br><input type="checkbox"/> GMO specific                                                                                                                                                                                       |
| <b>METHODOLOGY</b>                                                                                |                                                                                                                                                                                                                                                                                |
| Observations                                                                                      | <input checked="" type="checkbox"/> Reported, verifiable methodology<br><input type="checkbox"/> Reported, unverifiable methodology<br><input type="checkbox"/> Unknown, unverifiable methodology                                                                              |
| Frequency                                                                                         | <input checked="" type="checkbox"/> > 1 time/year:<br><input type="checkbox"/> 1 time/year:<br><input type="checkbox"/> < 1 time/year                                                                                                                                          |
| Future                                                                                            | <input checked="" type="checkbox"/> For ≥ 5 years<br><input type="checkbox"/> between 1 and 5 years<br><input type="checkbox"/> no prospect                                                                                                                                    |
| Quality of performers                                                                             | <input type="checkbox"/> Trained, professionals<br><input checked="" type="checkbox"/> Trained, non-professionals: regular training for bird ringers, determination booklets/guides<br><input type="checkbox"/> Uncertain or not –specified                                    |
| Quality of data                                                                                   | <input checked="" type="checkbox"/> Standard recording of raw data<br><input type="checkbox"/> Free recording of raw data<br><input type="checkbox"/> Anecdotic                                                                                                                |
| Analysis                                                                                          | <input type="checkbox"/> Reported, verifiable methodology<br><input type="checkbox"/> Reported, unverifiable methodology<br><input type="checkbox"/> Unknown, unverifiable methodology                                                                                         |
| Quality of analysis                                                                               | <input checked="" type="checkbox"/> Scientifically based<br><input type="checkbox"/> Indicative only<br><input type="checkbox"/> Unknown                                                                                                                                       |
| <b>REPORTING</b>                                                                                  |                                                                                                                                                                                                                                                                                |
| Language                                                                                          | <input type="checkbox"/> Specify reporting language(s):                                                                                                                                                                                                                        |
| Availability                                                                                      | <input type="checkbox"/> Scientific publication<br><input type="checkbox"/> Official report available on the internet or in other public forum: graphs on website<br><input type="checkbox"/> Official report available from network<br><input type="checkbox"/> Not available |
| Frequency                                                                                         | <input type="checkbox"/> ≥ 1 time/year –<br><input type="checkbox"/> < 1 time/year –                                                                                                                                                                                           |
| Historical reference                                                                              | <input checked="" type="checkbox"/> over ≥ 5 years:<br><input type="checkbox"/> between 1 and 5 years:<br><input type="checkbox"/> no historical analysis:                                                                                                                     |
| <b>COMMENT(S)</b>                                                                                 |                                                                                                                                                                                                                                                                                |
| A monitoring network following migratory bird species and endangered species as protection goals. |                                                                                                                                                                                                                                                                                |

## GSEN-09-0134.00.1 F – Noé Conservation

| EuropaBio's coordinated approach to General Surveillance: Existing Networks |                                                                                                                                                                                                                                                                                                                                                                                                       |                                                                                                                                                                                                                                                                                                                                                                                                                                                                                                                   |                                                                                                                                                                                                                                                                                                         |
|-----------------------------------------------------------------------------|-------------------------------------------------------------------------------------------------------------------------------------------------------------------------------------------------------------------------------------------------------------------------------------------------------------------------------------------------------------------------------------------------------|-------------------------------------------------------------------------------------------------------------------------------------------------------------------------------------------------------------------------------------------------------------------------------------------------------------------------------------------------------------------------------------------------------------------------------------------------------------------------------------------------------------------|---------------------------------------------------------------------------------------------------------------------------------------------------------------------------------------------------------------------------------------------------------------------------------------------------------|
| <b>ORGANISATION</b>                                                         |                                                                                                                                                                                                                                                                                                                                                                                                       |                                                                                                                                                                                                                                                                                                                                                                                                                                                                                                                   |                                                                                                                                                                                                                                                                                                         |
| EuropaBio reference                                                         | GS-EN-09-0134                                                                                                                                                                                                                                                                                                                                                                                         |                                                                                                                                                                                                                                                                                                                                                                                                                                                                                                                   |                                                                                                                                                                                                                                                                                                         |
| Official name of the Network                                                | <b>Noé Conservation</b><br>L'Observatoire des Papillons des Jardins<br>L'Opération Escargots                                                                                                                                                                                                                                                                                                          |                                                                                                                                                                                                                                                                                                                                                                                                                                                                                                                   |                                                                                                                                                                                                                                                                                                         |
| Other names                                                                 | Noah conservation                                                                                                                                                                                                                                                                                                                                                                                     |                                                                                                                                                                                                                                                                                                                                                                                                                                                                                                                   |                                                                                                                                                                                                                                                                                                         |
| Type of organisation                                                        | Nature conservation<br>Founded 2001                                                                                                                                                                                                                                                                                                                                                                   |                                                                                                                                                                                                                                                                                                                                                                                                                                                                                                                   |                                                                                                                                                                                                                                                                                                         |
| Coordinates                                                                 | Noé Conservation<br>c/o La Ménagerie du Jardin des Plantes<br>CP 31<br>57, rue Cuvier<br>75231 Paris cedex 05                                                                                                                                                                                                                                                                                         |                                                                                                                                                                                                                                                                                                                                                                                                                                                                                                                   |                                                                                                                                                                                                                                                                                                         |
| Website                                                                     | <a href="http://www.noeconservation.org/index2.php?rub=12&amp;srub=31&amp;ssrub=98&amp;sssrub=100&amp;goto=contenu">http://www.noeconservation.org/index2.php?rub=12&amp;srub=31&amp;ssrub=98&amp;sssrub=100&amp;goto=contenu</a><br><a href="http://www.noeconservation.org/">http://www.noeconservation.org/</a>                                                                                    |                                                                                                                                                                                                                                                                                                                                                                                                                                                                                                                   |                                                                                                                                                                                                                                                                                                         |
| Funding                                                                     | enterprises, public institutions, scientists, various personalities                                                                                                                                                                                                                                                                                                                                   |                                                                                                                                                                                                                                                                                                                                                                                                                                                                                                                   |                                                                                                                                                                                                                                                                                                         |
| Conflict of interest                                                        | -                                                                                                                                                                                                                                                                                                                                                                                                     |                                                                                                                                                                                                                                                                                                                                                                                                                                                                                                                   |                                                                                                                                                                                                                                                                                                         |
| Part of other network(s)                                                    | - numerous partnerships; the butterfly program runs in collaboration with the Muséum national d'Histoire naturelle, Vigie Nature<br>- part of Butterfly Conservation Europe                                                                                                                                                                                                                           |                                                                                                                                                                                                                                                                                                                                                                                                                                                                                                                   |                                                                                                                                                                                                                                                                                                         |
| Grouping other network(s)                                                   | Regional associations                                                                                                                                                                                                                                                                                                                                                                                 |                                                                                                                                                                                                                                                                                                                                                                                                                                                                                                                   |                                                                                                                                                                                                                                                                                                         |
| <b>MONITORING SUBJECT</b>                                                   |                                                                                                                                                                                                                                                                                                                                                                                                       |                                                                                                                                                                                                                                                                                                                                                                                                                                                                                                                   |                                                                                                                                                                                                                                                                                                         |
| Description                                                                 | Monitoring program: "garden butterflies and observation of garden biodiversity" focussing on butterflies (also eggs and caterpillars), bumblebees, and snails and slugs                                                                                                                                                                                                                               |                                                                                                                                                                                                                                                                                                                                                                                                                                                                                                                   |                                                                                                                                                                                                                                                                                                         |
| Protection goal(s) and/or influencing factor(s)                             | <input checked="" type="checkbox"/> Protection goal<br><br><input checked="" type="checkbox"/> Biodiversity: butterflies, insects<br><input type="checkbox"/> Human Health<br><input type="checkbox"/> Animal Health<br><input type="checkbox"/> Plant Health<br><input type="checkbox"/> Soil function<br><input type="checkbox"/> Water quality<br><input type="checkbox"/> Sustainable Agriculture | <input type="checkbox"/> Influencing factor<br><br><input type="checkbox"/> Agronomic practice<br><input type="checkbox"/> Plant protection<br><input type="checkbox"/> GMO cultivation<br><input type="checkbox"/> Environmental conditions                                                                                                                                                                                                                                                                      |                                                                                                                                                                                                                                                                                                         |
| Duplication of Farmer's questionnaire                                       | <input checked="" type="checkbox"/> No duplication<br><input type="checkbox"/> Partly duplication<br><input type="checkbox"/> Complete duplication                                                                                                                                                                                                                                                    |                                                                                                                                                                                                                                                                                                                                                                                                                                                                                                                   |                                                                                                                                                                                                                                                                                                         |
| <b>SPECIFICITY</b>                                                          |                                                                                                                                                                                                                                                                                                                                                                                                       |                                                                                                                                                                                                                                                                                                                                                                                                                                                                                                                   |                                                                                                                                                                                                                                                                                                         |
| Geography                                                                   | <input type="checkbox"/> EU –wide<br><br><input type="checkbox"/> Zone A – North<br><input type="checkbox"/> Zone B – Centre:<br><input type="checkbox"/> Zone C – South                                                                                                                                                                                                                              |                                                                                                                                                                                                                                                                                                                                                                                                                                                                                                                   |                                                                                                                                                                                                                                                                                                         |
|                                                                             | <input type="checkbox"/> Denmark,<br><input type="checkbox"/> Estonia,<br><input type="checkbox"/> Latvia,<br><input type="checkbox"/> Lithuania,<br><input type="checkbox"/> Finland,<br><input type="checkbox"/> Sweden                                                                                                                                                                             | <input type="checkbox"/> Belgium,<br><input type="checkbox"/> Czech Republic<br><input type="checkbox"/> Germany,<br><input type="checkbox"/> Ireland,<br><input type="checkbox"/> Luxembourg,<br><input type="checkbox"/> Hungary,<br><input type="checkbox"/> Netherlands,<br><input type="checkbox"/> Austria,<br><input type="checkbox"/> Poland,<br><input type="checkbox"/> Romania,<br><input type="checkbox"/> Slovenia,<br><input type="checkbox"/> Slovakia,<br><input type="checkbox"/> United Kingdom | <input type="checkbox"/> Bulgaria,<br><input type="checkbox"/> Greece,<br><input type="checkbox"/> Spain,<br><input checked="" type="checkbox"/> France,<br><input type="checkbox"/> Italy,<br><input type="checkbox"/> Cyprus,<br><input type="checkbox"/> Malta,<br><input type="checkbox"/> Portugal |
|                                                                             | <input type="checkbox"/> Regional (specify)<br><input type="checkbox"/> Local (specify)                                                                                                                                                                                                                                                                                                               |                                                                                                                                                                                                                                                                                                                                                                                                                                                                                                                   |                                                                                                                                                                                                                                                                                                         |
| Factors                                                                     | <input checked="" type="checkbox"/> Multiple species/items (specify): butterfly species, bumblebees, and snails and slugs<br><input type="checkbox"/> Single species/item (specify)                                                                                                                                                                                                                   |                                                                                                                                                                                                                                                                                                                                                                                                                                                                                                                   |                                                                                                                                                                                                                                                                                                         |
| Crop                                                                        | <input type="checkbox"/> No specific crop(s)<br><input type="checkbox"/> Several crops (e.g. all cereals)<br><input type="checkbox"/> Single crop                                                                                                                                                                                                                                                     |                                                                                                                                                                                                                                                                                                                                                                                                                                                                                                                   |                                                                                                                                                                                                                                                                                                         |
| Trait /treatment                                                            | <input type="checkbox"/> No specific traits/treatments<br><input type="checkbox"/> Several traits/treatments                                                                                                                                                                                                                                                                                          |                                                                                                                                                                                                                                                                                                                                                                                                                                                                                                                   |                                                                                                                                                                                                                                                                                                         |

|                                                                                        |                                                                                                                                                                                                                                                                                           |
|----------------------------------------------------------------------------------------|-------------------------------------------------------------------------------------------------------------------------------------------------------------------------------------------------------------------------------------------------------------------------------------------|
|                                                                                        | <input type="checkbox"/> Single trait/treatment                                                                                                                                                                                                                                           |
| GMO                                                                                    | <input checked="" type="checkbox"/> No GMO bias<br><input type="checkbox"/> GMO specific                                                                                                                                                                                                  |
| <b>METHODOLOGY</b>                                                                     |                                                                                                                                                                                                                                                                                           |
| Observations                                                                           | <input type="checkbox"/> Reported, verifiable methodology<br><input checked="" type="checkbox"/> Reported, unverifiable methodology<br><input type="checkbox"/> Unknown, unverifiable methodology                                                                                         |
| Frequency                                                                              | <input checked="" type="checkbox"/> > 1 time/year:<br><input type="checkbox"/> 1 time/year:<br><input type="checkbox"/> < 1 time/year                                                                                                                                                     |
| Future                                                                                 | <input checked="" type="checkbox"/> For ≥ 5 years<br><input type="checkbox"/> between 1 and 5 years<br><input type="checkbox"/> no prospect                                                                                                                                               |
| Quality of performers                                                                  | <input type="checkbox"/> Trained, professionals<br><input checked="" type="checkbox"/> Trained, non-professionals - training by documentation, volunteers<br><input type="checkbox"/> Uncertain or not –specified                                                                         |
| Quality of data                                                                        | <input checked="" type="checkbox"/> Standard recording of raw data<br><input type="checkbox"/> Free recording of raw data<br><input type="checkbox"/> Anecdotic                                                                                                                           |
| Analysis                                                                               | <input type="checkbox"/> Reported, verifiable methodology<br><input type="checkbox"/> Reported, unverifiable methodology<br><input checked="" type="checkbox"/> Unknown, unverifiable methodology                                                                                         |
| Quality of analysis                                                                    | <input checked="" type="checkbox"/> Scientifically based<br><input type="checkbox"/> Indicative only<br><input type="checkbox"/> Unknown                                                                                                                                                  |
| <b>REPORTING</b>                                                                       |                                                                                                                                                                                                                                                                                           |
| Language                                                                               | <input checked="" type="checkbox"/> Specify reporting language(s): French                                                                                                                                                                                                                 |
| Availability                                                                           | <input type="checkbox"/> Scientific publication<br><input checked="" type="checkbox"/> Official report available on the internet or in other public forum: graphs on website<br><input type="checkbox"/> Official report available from network<br><input type="checkbox"/> Not available |
| Frequency                                                                              | <input checked="" type="checkbox"/> ≥ 1 time/year –<br><input type="checkbox"/> < 1 time/year –                                                                                                                                                                                           |
| Historical reference                                                                   | <input checked="" type="checkbox"/> over ≥ 5 years:<br><input type="checkbox"/> between 1 and 5 years:<br><input checked="" type="checkbox"/> no historical analysis: bumblebees, snails and slugs                                                                                        |
| <b>COMMENT(S)</b>                                                                      |                                                                                                                                                                                                                                                                                           |
| Focus on conservation targets for butterflies, bumblebees, snails and slugs in gardens |                                                                                                                                                                                                                                                                                           |

## GSEN-09-0139.00.1 F – Société française d'Odonatologie

| EuropaBio's coordinated approach to General Surveillance: Existing Networks |                                                                                                                                                                                                                                                                                                                               |                                                                                                                                                                                                                                                                                                                                                                                                                                                                                                                   |                                                                                                                                                                                                                                                                                                         |
|-----------------------------------------------------------------------------|-------------------------------------------------------------------------------------------------------------------------------------------------------------------------------------------------------------------------------------------------------------------------------------------------------------------------------|-------------------------------------------------------------------------------------------------------------------------------------------------------------------------------------------------------------------------------------------------------------------------------------------------------------------------------------------------------------------------------------------------------------------------------------------------------------------------------------------------------------------|---------------------------------------------------------------------------------------------------------------------------------------------------------------------------------------------------------------------------------------------------------------------------------------------------------|
| ORGANISATION                                                                |                                                                                                                                                                                                                                                                                                                               |                                                                                                                                                                                                                                                                                                                                                                                                                                                                                                                   |                                                                                                                                                                                                                                                                                                         |
| EuropaBio reference                                                         | GS-EN-09-0139                                                                                                                                                                                                                                                                                                                 |                                                                                                                                                                                                                                                                                                                                                                                                                                                                                                                   |                                                                                                                                                                                                                                                                                                         |
| Official name of the Network                                                | <b>Société française d'Odonatologie</b>                                                                                                                                                                                                                                                                                       |                                                                                                                                                                                                                                                                                                                                                                                                                                                                                                                   |                                                                                                                                                                                                                                                                                                         |
| Other names                                                                 | SFO                                                                                                                                                                                                                                                                                                                           |                                                                                                                                                                                                                                                                                                                                                                                                                                                                                                                   |                                                                                                                                                                                                                                                                                                         |
| Type of organisation                                                        | Nature conservation<br>Founded 1991                                                                                                                                                                                                                                                                                           |                                                                                                                                                                                                                                                                                                                                                                                                                                                                                                                   |                                                                                                                                                                                                                                                                                                         |
| Coordinates                                                                 | SFO<br>7, rue Lamartine<br>F-78390 Bois d'Arcy<br>France<br><br>Email: info[at]libellules.org                                                                                                                                                                                                                                 |                                                                                                                                                                                                                                                                                                                                                                                                                                                                                                                   |                                                                                                                                                                                                                                                                                                         |
| Website                                                                     | <a href="http://www.libellules.org">http://www.libellules.org</a>                                                                                                                                                                                                                                                             |                                                                                                                                                                                                                                                                                                                                                                                                                                                                                                                   |                                                                                                                                                                                                                                                                                                         |
| Funding                                                                     | By member fees                                                                                                                                                                                                                                                                                                                |                                                                                                                                                                                                                                                                                                                                                                                                                                                                                                                   |                                                                                                                                                                                                                                                                                                         |
| Conflict of interest                                                        | -                                                                                                                                                                                                                                                                                                                             |                                                                                                                                                                                                                                                                                                                                                                                                                                                                                                                   |                                                                                                                                                                                                                                                                                                         |
| Part of other network(s)                                                    | Working with the Muséum National d'Histoire Naturelle, National Forestry Board and the Office For Insects and their Environment                                                                                                                                                                                               |                                                                                                                                                                                                                                                                                                                                                                                                                                                                                                                   |                                                                                                                                                                                                                                                                                                         |
| Grouping other network(s)                                                   |                                                                                                                                                                                                                                                                                                                               |                                                                                                                                                                                                                                                                                                                                                                                                                                                                                                                   |                                                                                                                                                                                                                                                                                                         |
| MONITORING SUBJECT                                                          |                                                                                                                                                                                                                                                                                                                               |                                                                                                                                                                                                                                                                                                                                                                                                                                                                                                                   |                                                                                                                                                                                                                                                                                                         |
| Description                                                                 | Monitoring <i>Odonata</i> (dragonflies ( <i>Anisoptera</i> ) and damselflies ( <i>Zygoptera</i> )) species.                                                                                                                                                                                                                   |                                                                                                                                                                                                                                                                                                                                                                                                                                                                                                                   |                                                                                                                                                                                                                                                                                                         |
| Protection goal(s) and/or influencing factor(s)                             | <input checked="" type="checkbox"/> Protection goal                                                                                                                                                                                                                                                                           | <input type="checkbox"/> Influencing factor                                                                                                                                                                                                                                                                                                                                                                                                                                                                       |                                                                                                                                                                                                                                                                                                         |
|                                                                             | <input checked="" type="checkbox"/> Biodiversity: insects<br><input type="checkbox"/> Human Health<br><input type="checkbox"/> Animal Health<br><input type="checkbox"/> Plant Health<br><input type="checkbox"/> Soil function<br><input type="checkbox"/> Water quality<br><input type="checkbox"/> Sustainable Agriculture | <input type="checkbox"/> Agronomic practice<br><input type="checkbox"/> Plant protection<br><input type="checkbox"/> GMO cultivation<br><input type="checkbox"/> Environmental conditions                                                                                                                                                                                                                                                                                                                         |                                                                                                                                                                                                                                                                                                         |
| Duplication of Farmer's questionnaire                                       | <input checked="" type="checkbox"/> No duplication<br><input type="checkbox"/> Partly duplication<br><input type="checkbox"/> Complete duplication                                                                                                                                                                            |                                                                                                                                                                                                                                                                                                                                                                                                                                                                                                                   |                                                                                                                                                                                                                                                                                                         |
| SPECIFICITY                                                                 |                                                                                                                                                                                                                                                                                                                               |                                                                                                                                                                                                                                                                                                                                                                                                                                                                                                                   |                                                                                                                                                                                                                                                                                                         |
| Geography                                                                   | <input type="checkbox"/> EU –wide                                                                                                                                                                                                                                                                                             |                                                                                                                                                                                                                                                                                                                                                                                                                                                                                                                   |                                                                                                                                                                                                                                                                                                         |
|                                                                             | <input type="checkbox"/> Zone A – North                                                                                                                                                                                                                                                                                       | <input type="checkbox"/> Zone B – Centre:                                                                                                                                                                                                                                                                                                                                                                                                                                                                         | <input type="checkbox"/> Zone C – South                                                                                                                                                                                                                                                                 |
|                                                                             | <input type="checkbox"/> Denmark,<br><input type="checkbox"/> Estonia,<br><input type="checkbox"/> Latvia,<br><input type="checkbox"/> Lithuania,<br><input type="checkbox"/> Finland,<br><input type="checkbox"/> Sweden                                                                                                     | <input type="checkbox"/> Belgium,<br><input type="checkbox"/> Czech Republic<br><input type="checkbox"/> Germany,<br><input type="checkbox"/> Ireland,<br><input type="checkbox"/> Luxembourg,<br><input type="checkbox"/> Hungary,<br><input type="checkbox"/> Netherlands,<br><input type="checkbox"/> Austria,<br><input type="checkbox"/> Poland,<br><input type="checkbox"/> Romania,<br><input type="checkbox"/> Slovenia,<br><input type="checkbox"/> Slovakia,<br><input type="checkbox"/> United Kingdom | <input type="checkbox"/> Bulgaria,<br><input type="checkbox"/> Greece,<br><input type="checkbox"/> Spain,<br><input checked="" type="checkbox"/> France,<br><input type="checkbox"/> Italy,<br><input type="checkbox"/> Cyprus,<br><input type="checkbox"/> Malta,<br><input type="checkbox"/> Portugal |
|                                                                             | <input type="checkbox"/> Regional (specify)<br><input type="checkbox"/> Local (specify)                                                                                                                                                                                                                                       |                                                                                                                                                                                                                                                                                                                                                                                                                                                                                                                   |                                                                                                                                                                                                                                                                                                         |
| Factors                                                                     | <input checked="" type="checkbox"/> Multiple species/items (specify): odonata<br><input type="checkbox"/> Single species/item (specify)                                                                                                                                                                                       |                                                                                                                                                                                                                                                                                                                                                                                                                                                                                                                   |                                                                                                                                                                                                                                                                                                         |
| Crop                                                                        | <input type="checkbox"/> No specific crop(s)<br><input type="checkbox"/> Several crops (e.g. all cereals)<br><input type="checkbox"/> Single crop                                                                                                                                                                             |                                                                                                                                                                                                                                                                                                                                                                                                                                                                                                                   |                                                                                                                                                                                                                                                                                                         |
| Trait /treatment                                                            | <input type="checkbox"/> No specific traits/treatments<br><input type="checkbox"/> Several traits/treatments<br><input type="checkbox"/> Single trait/treatment                                                                                                                                                               |                                                                                                                                                                                                                                                                                                                                                                                                                                                                                                                   |                                                                                                                                                                                                                                                                                                         |
| GMO                                                                         | <input checked="" type="checkbox"/> No GMO bias<br><input type="checkbox"/> GMO specific                                                                                                                                                                                                                                      |                                                                                                                                                                                                                                                                                                                                                                                                                                                                                                                   |                                                                                                                                                                                                                                                                                                         |

| <b>METHODOLOGY</b>                                                                                                                                                                                                                |                                                                                                                                                                                                                                                                                                                 |
|-----------------------------------------------------------------------------------------------------------------------------------------------------------------------------------------------------------------------------------|-----------------------------------------------------------------------------------------------------------------------------------------------------------------------------------------------------------------------------------------------------------------------------------------------------------------|
| Observations                                                                                                                                                                                                                      | <input checked="" type="checkbox"/> Reported, verifiable methodology<br><input type="checkbox"/> Reported, unverifiable methodology<br><input type="checkbox"/> Unknown, unverifiable methodology                                                                                                               |
| Frequency                                                                                                                                                                                                                         | <input checked="" type="checkbox"/> > 1 time/year:<br><input type="checkbox"/> 1 time/year:<br><input type="checkbox"/> < 1 time/year                                                                                                                                                                           |
| Future                                                                                                                                                                                                                            | <input checked="" type="checkbox"/> For $\geq$ 5 years<br><input type="checkbox"/> between 1 and 5 years<br><input type="checkbox"/> no prospect                                                                                                                                                                |
| Quality of performers                                                                                                                                                                                                             | <input type="checkbox"/> Trained, professionals<br><input checked="" type="checkbox"/> Trained, non-professionals – training by documentation, volunteers<br><input type="checkbox"/> Uncertain or not –specified                                                                                               |
| Quality of data                                                                                                                                                                                                                   | <input checked="" type="checkbox"/> Standard recording of raw data<br><input type="checkbox"/> Free recording of raw data<br><input type="checkbox"/> Anecdotal                                                                                                                                                 |
| Analysis                                                                                                                                                                                                                          | <input type="checkbox"/> Reported, verifiable methodology<br><input type="checkbox"/> Reported, unverifiable methodology<br><input checked="" type="checkbox"/> Unknown, unverifiable methodology                                                                                                               |
| Quality of analysis                                                                                                                                                                                                               | <input checked="" type="checkbox"/> Scientifically based<br><input type="checkbox"/> Indicative only<br><input type="checkbox"/> Unknown                                                                                                                                                                        |
| <b>REPORTING</b>                                                                                                                                                                                                                  |                                                                                                                                                                                                                                                                                                                 |
| Language                                                                                                                                                                                                                          | <input checked="" type="checkbox"/> Specify reporting language(s): French                                                                                                                                                                                                                                       |
| Availability                                                                                                                                                                                                                      | <input checked="" type="checkbox"/> Scientific publication<br><input checked="" type="checkbox"/> Official report available on the internet or in other public forum: graphs on website<br><input checked="" type="checkbox"/> Official report available from network<br><input type="checkbox"/> Not available |
| Frequency                                                                                                                                                                                                                         | <input checked="" type="checkbox"/> $\geq$ 1 time/year – Journal “Martinia” covers also subjects outside EU<br><input checked="" type="checkbox"/> < 1 time/year – Atlas/inventory                                                                                                                              |
| Historical reference                                                                                                                                                                                                              | <input checked="" type="checkbox"/> over $\geq$ 5 years:<br><input type="checkbox"/> between 1 and 5 years<br><input type="checkbox"/> no historical analysis                                                                                                                                                   |
| <b>COMMENT(S)</b>                                                                                                                                                                                                                 |                                                                                                                                                                                                                                                                                                                 |
| <p>An inventory has been concluded for the period 1982-2004: a preliminary atlas has been published in 1994 covering the period 1982-1992, another one to come; a new inventory has started in 2007 and will last until 2015.</p> |                                                                                                                                                                                                                                                                                                                 |

## GSEN-09-0141.00.1 F – GIS Sol

| EuropaBio's coordinated approach to General Surveillance: Existing Networks |                                                                                                                                                                                                                                                                                                                                                                                 |                                                                                                                                                                                                                                                                                                                                                                                                                                                                                                                   |                                                                                                                                                                                                                                                                                                         |
|-----------------------------------------------------------------------------|---------------------------------------------------------------------------------------------------------------------------------------------------------------------------------------------------------------------------------------------------------------------------------------------------------------------------------------------------------------------------------|-------------------------------------------------------------------------------------------------------------------------------------------------------------------------------------------------------------------------------------------------------------------------------------------------------------------------------------------------------------------------------------------------------------------------------------------------------------------------------------------------------------------|---------------------------------------------------------------------------------------------------------------------------------------------------------------------------------------------------------------------------------------------------------------------------------------------------------|
| ORGANISATION                                                                |                                                                                                                                                                                                                                                                                                                                                                                 |                                                                                                                                                                                                                                                                                                                                                                                                                                                                                                                   |                                                                                                                                                                                                                                                                                                         |
| EuropaBio reference                                                         | GS-EN-09-0141                                                                                                                                                                                                                                                                                                                                                                   |                                                                                                                                                                                                                                                                                                                                                                                                                                                                                                                   |                                                                                                                                                                                                                                                                                                         |
| Official name of the Network                                                | <b>Groupe ment d'Intérêt Scientifique Sol</b>                                                                                                                                                                                                                                                                                                                                   |                                                                                                                                                                                                                                                                                                                                                                                                                                                                                                                   |                                                                                                                                                                                                                                                                                                         |
| Other names                                                                 | Soil research (GIS Sol)                                                                                                                                                                                                                                                                                                                                                         |                                                                                                                                                                                                                                                                                                                                                                                                                                                                                                                   |                                                                                                                                                                                                                                                                                                         |
| Type of organisation                                                        | Governmental<br>Founded 2001                                                                                                                                                                                                                                                                                                                                                    |                                                                                                                                                                                                                                                                                                                                                                                                                                                                                                                   |                                                                                                                                                                                                                                                                                                         |
| Coordinates                                                                 | 2163 Av. de la Pomme de Pin<br>CS 40001-Ardon<br>45075 ORLEANS CEDEX 2<br><br>Fax : 02.38.41.78.69<br>email : infosol[at]orleans.inra.fr                                                                                                                                                                                                                                        |                                                                                                                                                                                                                                                                                                                                                                                                                                                                                                                   |                                                                                                                                                                                                                                                                                                         |
| Website                                                                     | <a href="http://www.gissol.fr">http://www.gissol.fr</a>                                                                                                                                                                                                                                                                                                                         |                                                                                                                                                                                                                                                                                                                                                                                                                                                                                                                   |                                                                                                                                                                                                                                                                                                         |
| Funding                                                                     | public                                                                                                                                                                                                                                                                                                                                                                          |                                                                                                                                                                                                                                                                                                                                                                                                                                                                                                                   |                                                                                                                                                                                                                                                                                                         |
| Conflict of interest                                                        | -                                                                                                                                                                                                                                                                                                                                                                               |                                                                                                                                                                                                                                                                                                                                                                                                                                                                                                                   |                                                                                                                                                                                                                                                                                                         |
| Part of other network(s)                                                    | - includes the Ministry of Agriculture and Fisheries, the Ministry of Environment and Sustainable Development, National Institute of Agronomic Research (INRA), the French Institute of Environment (Ifen), the Agency for Environment and Energy Management (ADEME) and the Institute of Development Research (IRD)                                                            |                                                                                                                                                                                                                                                                                                                                                                                                                                                                                                                   |                                                                                                                                                                                                                                                                                                         |
| Grouping other network(s)                                                   | Regional partners                                                                                                                                                                                                                                                                                                                                                               |                                                                                                                                                                                                                                                                                                                                                                                                                                                                                                                   |                                                                                                                                                                                                                                                                                                         |
| MONITORING SUBJECT                                                          |                                                                                                                                                                                                                                                                                                                                                                                 |                                                                                                                                                                                                                                                                                                                                                                                                                                                                                                                   |                                                                                                                                                                                                                                                                                                         |
| Description                                                                 | geographic inventory of land, operational monitoring of their qualities, creation and management of an information system to meet the demands of government and society..                                                                                                                                                                                                       |                                                                                                                                                                                                                                                                                                                                                                                                                                                                                                                   |                                                                                                                                                                                                                                                                                                         |
| Protection goal(s) and/or influencing factor(s)                             | <input checked="" type="checkbox"/> Protection goal<br><br><input type="checkbox"/> Biodiversity<br><input type="checkbox"/> Human Health<br><input type="checkbox"/> Animal Health<br><input type="checkbox"/> Plant Health<br><input checked="" type="checkbox"/> Soil function<br><input type="checkbox"/> Water quality<br><input type="checkbox"/> Sustainable Agriculture | <input type="checkbox"/> Influencing factor<br><br><input type="checkbox"/> Agronomic practice<br><input type="checkbox"/> Plant protection<br><input type="checkbox"/> GMO cultivation<br><input type="checkbox"/> Environmental conditions                                                                                                                                                                                                                                                                      |                                                                                                                                                                                                                                                                                                         |
| Duplication of Farmer's questionnaire                                       | <input type="checkbox"/> No duplication<br><input checked="" type="checkbox"/> Partly duplication<br><input type="checkbox"/> Complete duplication                                                                                                                                                                                                                              |                                                                                                                                                                                                                                                                                                                                                                                                                                                                                                                   |                                                                                                                                                                                                                                                                                                         |
| SPECIFICITY                                                                 |                                                                                                                                                                                                                                                                                                                                                                                 |                                                                                                                                                                                                                                                                                                                                                                                                                                                                                                                   |                                                                                                                                                                                                                                                                                                         |
| Geography                                                                   | <input type="checkbox"/> EU -wide<br><br><input type="checkbox"/> Zone A – North<br><input type="checkbox"/> Zone B – Centre:<br><input type="checkbox"/> Zone C – South                                                                                                                                                                                                        |                                                                                                                                                                                                                                                                                                                                                                                                                                                                                                                   |                                                                                                                                                                                                                                                                                                         |
|                                                                             | <input type="checkbox"/> Denmark,<br><input type="checkbox"/> Estonia,<br><input type="checkbox"/> Latvia,<br><input type="checkbox"/> Lithuania,<br><input type="checkbox"/> Finland,<br><input type="checkbox"/> Sweden                                                                                                                                                       | <input type="checkbox"/> Belgium,<br><input type="checkbox"/> Czech Republic<br><input type="checkbox"/> Germany,<br><input type="checkbox"/> Ireland,<br><input type="checkbox"/> Luxembourg,<br><input type="checkbox"/> Hungary,<br><input type="checkbox"/> Netherlands,<br><input type="checkbox"/> Austria,<br><input type="checkbox"/> Poland,<br><input type="checkbox"/> Romania,<br><input type="checkbox"/> Slovenia,<br><input type="checkbox"/> Slovakia,<br><input type="checkbox"/> United Kingdom | <input type="checkbox"/> Bulgaria,<br><input type="checkbox"/> Greece,<br><input type="checkbox"/> Spain,<br><input checked="" type="checkbox"/> France,<br><input type="checkbox"/> Italy,<br><input type="checkbox"/> Cyprus,<br><input type="checkbox"/> Malta,<br><input type="checkbox"/> Portugal |
|                                                                             | <input type="checkbox"/> Regional (specify)<br><input type="checkbox"/> Local (Specify)                                                                                                                                                                                                                                                                                         |                                                                                                                                                                                                                                                                                                                                                                                                                                                                                                                   |                                                                                                                                                                                                                                                                                                         |
| Factors                                                                     | <input type="checkbox"/> Multiple species/items (specify) .....<br><input checked="" type="checkbox"/> Single species/item (specify): soil                                                                                                                                                                                                                                      |                                                                                                                                                                                                                                                                                                                                                                                                                                                                                                                   |                                                                                                                                                                                                                                                                                                         |
| Crop                                                                        | <input checked="" type="checkbox"/> No specific crop(s)<br><input type="checkbox"/> Several crops (e.g. all cereals)<br><input type="checkbox"/> Single crop                                                                                                                                                                                                                    |                                                                                                                                                                                                                                                                                                                                                                                                                                                                                                                   |                                                                                                                                                                                                                                                                                                         |
| Trait /treatment                                                            | <input checked="" type="checkbox"/> No specific traits/treatments<br><input type="checkbox"/> Several traits/treatments<br><input type="checkbox"/> Single trait/treatment                                                                                                                                                                                                      |                                                                                                                                                                                                                                                                                                                                                                                                                                                                                                                   |                                                                                                                                                                                                                                                                                                         |

|                                                                                                                      |                                                                                                                                                                                                                                                                                                     |
|----------------------------------------------------------------------------------------------------------------------|-----------------------------------------------------------------------------------------------------------------------------------------------------------------------------------------------------------------------------------------------------------------------------------------------------|
| GMO                                                                                                                  | <input checked="" type="checkbox"/> No GMO bias<br><input type="checkbox"/> GMO specific                                                                                                                                                                                                            |
| <b>METHODOLOGY</b>                                                                                                   |                                                                                                                                                                                                                                                                                                     |
| Observations                                                                                                         | <input checked="" type="checkbox"/> Reported, verifiable methodology<br><input type="checkbox"/> Reported, unverifiable methodology<br><input type="checkbox"/> Unknown, unverifiable methodology                                                                                                   |
| Frequency                                                                                                            | <input type="checkbox"/> > 1 time/year<br><input type="checkbox"/> 1 time/year<br><input checked="" type="checkbox"/> < 1 time/year: inventory once; quality every 10 years starting in 2008                                                                                                        |
| Future                                                                                                               | <input checked="" type="checkbox"/> For ≥ 5 years<br><input type="checkbox"/> between 1 and 5 years<br><input type="checkbox"/> no prospect                                                                                                                                                         |
| Quality of performers                                                                                                | <input checked="" type="checkbox"/> Trained, professionals<br><input type="checkbox"/> Trained, non-professionals<br><input type="checkbox"/> Uncertain or not -specified                                                                                                                           |
| Quality of data                                                                                                      | <input checked="" type="checkbox"/> Standard recording of raw data<br><input type="checkbox"/> Free recording of raw data<br><input type="checkbox"/> Anecdotal                                                                                                                                     |
| Analysis                                                                                                             | <input checked="" type="checkbox"/> Reported, verifiable methodology<br><input type="checkbox"/> Reported, unverifiable methodology<br><input type="checkbox"/> Unknown, unverifiable methodology                                                                                                   |
| Quality of analysis                                                                                                  | <input checked="" type="checkbox"/> Scientifically based<br><input type="checkbox"/> Indicative only<br><input type="checkbox"/> Unknown                                                                                                                                                            |
| <b>REPORTING</b>                                                                                                     |                                                                                                                                                                                                                                                                                                     |
| Language                                                                                                             | <input type="checkbox"/> Specify reporting language(s): French                                                                                                                                                                                                                                      |
| Availability                                                                                                         | <input type="checkbox"/> Scientific publication<br><input checked="" type="checkbox"/> Official report available on the internet or in other public forum<br><input checked="" type="checkbox"/> Official report available from network: pedological maps<br><input type="checkbox"/> Not available |
| Frequency                                                                                                            | <input type="checkbox"/> ≥ 1 time/year –<br><input type="checkbox"/> < 1 time/year – pedological maps, quality analysis                                                                                                                                                                             |
| Historical reference                                                                                                 | <input checked="" type="checkbox"/> over ≥ 5 years<br><input checked="" type="checkbox"/> between 1 and 5 years: quality analysis<br><input type="checkbox"/> no historical analysis                                                                                                                |
| <b>COMMENT(S)</b>                                                                                                    |                                                                                                                                                                                                                                                                                                     |
| Nation-wide data on soil types and quality. Specialized databases give carbon content, heavy metals, human pressure. |                                                                                                                                                                                                                                                                                                     |

## GSEN-09-0142.00.2 F – IMAGE

| EuropaBio's coordinated approach to General Surveillance: Existing Networks |                                                                                                                                                                                                                                                                                                                                                                                                  |                                                                                                                                                                                                                                                                                                                                                                                                                                                                                                                   |                                                                                                                                                                                                                                                                                                         |
|-----------------------------------------------------------------------------|--------------------------------------------------------------------------------------------------------------------------------------------------------------------------------------------------------------------------------------------------------------------------------------------------------------------------------------------------------------------------------------------------|-------------------------------------------------------------------------------------------------------------------------------------------------------------------------------------------------------------------------------------------------------------------------------------------------------------------------------------------------------------------------------------------------------------------------------------------------------------------------------------------------------------------|---------------------------------------------------------------------------------------------------------------------------------------------------------------------------------------------------------------------------------------------------------------------------------------------------------|
| ORGANISATION                                                                |                                                                                                                                                                                                                                                                                                                                                                                                  |                                                                                                                                                                                                                                                                                                                                                                                                                                                                                                                   |                                                                                                                                                                                                                                                                                                         |
| EuropaBio reference                                                         | GS-EN-09-0142                                                                                                                                                                                                                                                                                                                                                                                    |                                                                                                                                                                                                                                                                                                                                                                                                                                                                                                                   |                                                                                                                                                                                                                                                                                                         |
| Official name of the Network                                                | <b>Informations sur les Milieux Aquatiques pour la Gestion Environnementale</b><br><b>Office national de l'eau et des milieux aquatiques</b><br><b>Réseau Hydrobiologiques et Piscicoles</b>                                                                                                                                                                                                     |                                                                                                                                                                                                                                                                                                                                                                                                                                                                                                                   |                                                                                                                                                                                                                                                                                                         |
| Other names                                                                 | TNational Water and Aquatic Environments, IMAGE, ONEMA, hydrobiology network                                                                                                                                                                                                                                                                                                                     |                                                                                                                                                                                                                                                                                                                                                                                                                                                                                                                   |                                                                                                                                                                                                                                                                                                         |
| Type of organisation                                                        | Governmental<br>Founded 2007                                                                                                                                                                                                                                                                                                                                                                     |                                                                                                                                                                                                                                                                                                                                                                                                                                                                                                                   |                                                                                                                                                                                                                                                                                                         |
| Coordinates                                                                 | ONEMA<br>Immeuble le Nadar - Hall C<br>5, Square Félix Nadar<br>94300 – VINCENNES<br><br>email : <a href="mailto:image@onema.fr">image@onema.fr</a><br><a href="mailto:dg-mcp@onema.fr">dg-mcp@onema.fr</a>                                                                                                                                                                                      |                                                                                                                                                                                                                                                                                                                                                                                                                                                                                                                   |                                                                                                                                                                                                                                                                                                         |
| Website                                                                     | <a href="http://www.image.eaufrance.fr/">http://www.image.eaufrance.fr/</a>                                                                                                                                                                                                                                                                                                                      |                                                                                                                                                                                                                                                                                                                                                                                                                                                                                                                   |                                                                                                                                                                                                                                                                                                         |
| Funding                                                                     | public                                                                                                                                                                                                                                                                                                                                                                                           |                                                                                                                                                                                                                                                                                                                                                                                                                                                                                                                   |                                                                                                                                                                                                                                                                                                         |
| Conflict of interest                                                        | -                                                                                                                                                                                                                                                                                                                                                                                                |                                                                                                                                                                                                                                                                                                                                                                                                                                                                                                                   |                                                                                                                                                                                                                                                                                                         |
| Part of other network(s)                                                    | -                                                                                                                                                                                                                                                                                                                                                                                                |                                                                                                                                                                                                                                                                                                                                                                                                                                                                                                                   |                                                                                                                                                                                                                                                                                                         |
| Grouping other network(s)                                                   | For Onema: Regional and departmental parties                                                                                                                                                                                                                                                                                                                                                     |                                                                                                                                                                                                                                                                                                                                                                                                                                                                                                                   |                                                                                                                                                                                                                                                                                                         |
| MONITORING SUBJECT                                                          |                                                                                                                                                                                                                                                                                                                                                                                                  |                                                                                                                                                                                                                                                                                                                                                                                                                                                                                                                   |                                                                                                                                                                                                                                                                                                         |
| Description                                                                 | Monitoring fish populations and their evolution as a result of natural phenomena and human activity.                                                                                                                                                                                                                                                                                             |                                                                                                                                                                                                                                                                                                                                                                                                                                                                                                                   |                                                                                                                                                                                                                                                                                                         |
| Protection goal(s) and/or influencing factor(s)                             | <input checked="" type="checkbox"/> Protection goal<br><br><input checked="" type="checkbox"/> Biodiversity: fish<br><input type="checkbox"/> Human Health<br><input type="checkbox"/> Animal Health<br><input type="checkbox"/> Plant Health<br><input type="checkbox"/> Soil function<br><input checked="" type="checkbox"/> Water quality<br><input type="checkbox"/> Sustainable Agriculture | <input type="checkbox"/> Influencing factor<br><br><input type="checkbox"/> Agronomic practice<br><input type="checkbox"/> Plant protection<br><input type="checkbox"/> GMO cultivation<br><input type="checkbox"/> Environmental conditions                                                                                                                                                                                                                                                                      |                                                                                                                                                                                                                                                                                                         |
| Duplication of Farmer's questionnaire                                       | <input checked="" type="checkbox"/> No duplication<br><input type="checkbox"/> Partly duplication<br><input type="checkbox"/> Complete duplication                                                                                                                                                                                                                                               |                                                                                                                                                                                                                                                                                                                                                                                                                                                                                                                   |                                                                                                                                                                                                                                                                                                         |
| SPECIFICITY                                                                 |                                                                                                                                                                                                                                                                                                                                                                                                  |                                                                                                                                                                                                                                                                                                                                                                                                                                                                                                                   |                                                                                                                                                                                                                                                                                                         |
| Geography                                                                   | <input type="checkbox"/> EU -wide<br><br><input type="checkbox"/> Zone A – North<br><input type="checkbox"/> Zone B – Centre:<br><input type="checkbox"/> Zone C – South                                                                                                                                                                                                                         |                                                                                                                                                                                                                                                                                                                                                                                                                                                                                                                   |                                                                                                                                                                                                                                                                                                         |
|                                                                             | <input type="checkbox"/> Denmark,<br><input type="checkbox"/> Estonia,<br><input type="checkbox"/> Latvia,<br><input type="checkbox"/> Lithuania,<br><input type="checkbox"/> Finland,<br><input type="checkbox"/> Sweden                                                                                                                                                                        | <input type="checkbox"/> Belgium,<br><input type="checkbox"/> Czech Republic<br><input type="checkbox"/> Germany,<br><input type="checkbox"/> Ireland,<br><input type="checkbox"/> Luxembourg,<br><input type="checkbox"/> Hungary,<br><input type="checkbox"/> Netherlands,<br><input type="checkbox"/> Austria,<br><input type="checkbox"/> Poland,<br><input type="checkbox"/> Romania,<br><input type="checkbox"/> Slovenia,<br><input type="checkbox"/> Slovakia,<br><input type="checkbox"/> United Kingdom | <input type="checkbox"/> Bulgaria,<br><input type="checkbox"/> Greece,<br><input type="checkbox"/> Spain,<br><input checked="" type="checkbox"/> France,<br><input type="checkbox"/> Italy,<br><input type="checkbox"/> Cyprus,<br><input type="checkbox"/> Malta,<br><input type="checkbox"/> Portugal |
|                                                                             | <input type="checkbox"/> Regional (specify)<br><input type="checkbox"/> Local (Specify)                                                                                                                                                                                                                                                                                                          |                                                                                                                                                                                                                                                                                                                                                                                                                                                                                                                   |                                                                                                                                                                                                                                                                                                         |
| Factors                                                                     | <input checked="" type="checkbox"/> Multiple species/items (specify): fish species<br><input type="checkbox"/> Single species/item (specify)                                                                                                                                                                                                                                                     |                                                                                                                                                                                                                                                                                                                                                                                                                                                                                                                   |                                                                                                                                                                                                                                                                                                         |
| Crop                                                                        | <input checked="" type="checkbox"/> No specific crop(s)<br><input type="checkbox"/> Several crops (e.g. all cereals)<br><input type="checkbox"/> Single crop                                                                                                                                                                                                                                     |                                                                                                                                                                                                                                                                                                                                                                                                                                                                                                                   |                                                                                                                                                                                                                                                                                                         |
| Trait /treatment                                                            | <input checked="" type="checkbox"/> No specific traits/treatments<br><input type="checkbox"/> Several traits/treatments<br><input type="checkbox"/> Single trait/treatment                                                                                                                                                                                                                       |                                                                                                                                                                                                                                                                                                                                                                                                                                                                                                                   |                                                                                                                                                                                                                                                                                                         |



|                                                                                                                                           |                                                                                                                                                                                                                                                                        |
|-------------------------------------------------------------------------------------------------------------------------------------------|------------------------------------------------------------------------------------------------------------------------------------------------------------------------------------------------------------------------------------------------------------------------|
| GMO                                                                                                                                       | <input checked="" type="checkbox"/> No GMO bias<br><input type="checkbox"/> GMO specific                                                                                                                                                                               |
| <b>METHODOLOGY</b>                                                                                                                        |                                                                                                                                                                                                                                                                        |
| Observations                                                                                                                              | <input checked="" type="checkbox"/> Reported, verifiable methodology<br><input type="checkbox"/> Reported, unverifiable methodology<br><input type="checkbox"/> Unknown, unverifiable methodology                                                                      |
| Frequency                                                                                                                                 | <input checked="" type="checkbox"/> > 1 time/year<br><input type="checkbox"/> 1 time/year<br><input type="checkbox"/> < 1 time/year                                                                                                                                    |
| Future                                                                                                                                    | <input checked="" type="checkbox"/> For ≥ 5 years<br><input type="checkbox"/> between 1 and 5 years<br><input type="checkbox"/> no prospect                                                                                                                            |
| Quality of performers                                                                                                                     | <input checked="" type="checkbox"/> Trained, professionals<br><input type="checkbox"/> Trained, non-professionals –<br><input type="checkbox"/> Uncertain or not -specified                                                                                            |
| Quality of data                                                                                                                           | <input checked="" type="checkbox"/> Standard recording of raw data<br><input type="checkbox"/> Free recording of raw data<br><input type="checkbox"/> Anecdotal                                                                                                        |
| Analysis                                                                                                                                  | <input type="checkbox"/> Reported, verifiable methodology<br><input type="checkbox"/> Reported, unverifiable methodology<br><input checked="" type="checkbox"/> Unknown, unverifiable methodology                                                                      |
| Quality of analysis                                                                                                                       | <input type="checkbox"/> Scientifically based<br><input type="checkbox"/> Indicative only<br><input checked="" type="checkbox"/> Unknown                                                                                                                               |
| <b>REPORTING</b>                                                                                                                          |                                                                                                                                                                                                                                                                        |
| Language                                                                                                                                  | <input type="checkbox"/> Specify reporting language(s): French                                                                                                                                                                                                         |
| Availability                                                                                                                              | <input type="checkbox"/> Scientific publication<br><input checked="" type="checkbox"/> Official report available on the internet or in other public forum<br><input type="checkbox"/> Official report available from network<br><input type="checkbox"/> Not available |
| Frequency                                                                                                                                 | <input type="checkbox"/> ≥ 1 time/year –<br><input type="checkbox"/> < 1 time/year –                                                                                                                                                                                   |
| Historical reference                                                                                                                      | <input checked="" type="checkbox"/> over ≥ 5 years<br><input type="checkbox"/> between 1 and 5 years<br><input type="checkbox"/> no historical analysis                                                                                                                |
| <b>COMMENT(S)</b>                                                                                                                         |                                                                                                                                                                                                                                                                        |
| Nation-wide annual data on populations of fish. The evolution of populations is used as an indicator for the condition of the environment |                                                                                                                                                                                                                                                                        |

## GSEN-09-0143.00.1 F – Eaufrance

| EuropaBio's coordinated approach to General Surveillance: Existing Networks |                                                                                                                                                                                                                                                                                                                                                                                       |                                                                                                                                                                                                                                                                                                                                                                                                                                                                                                                   |                                                                                                                                                                                                                                                                                                         |
|-----------------------------------------------------------------------------|---------------------------------------------------------------------------------------------------------------------------------------------------------------------------------------------------------------------------------------------------------------------------------------------------------------------------------------------------------------------------------------|-------------------------------------------------------------------------------------------------------------------------------------------------------------------------------------------------------------------------------------------------------------------------------------------------------------------------------------------------------------------------------------------------------------------------------------------------------------------------------------------------------------------|---------------------------------------------------------------------------------------------------------------------------------------------------------------------------------------------------------------------------------------------------------------------------------------------------------|
| <b>ORGANISATION</b>                                                         |                                                                                                                                                                                                                                                                                                                                                                                       |                                                                                                                                                                                                                                                                                                                                                                                                                                                                                                                   |                                                                                                                                                                                                                                                                                                         |
| EuropaBio reference                                                         | GS-EN-09-0143                                                                                                                                                                                                                                                                                                                                                                         |                                                                                                                                                                                                                                                                                                                                                                                                                                                                                                                   |                                                                                                                                                                                                                                                                                                         |
| Official name of the Network                                                | <b>Eaufrance</b><br><b>Le portail de l'eau</b>                                                                                                                                                                                                                                                                                                                                        |                                                                                                                                                                                                                                                                                                                                                                                                                                                                                                                   |                                                                                                                                                                                                                                                                                                         |
| Other names                                                                 | The water portail, Réseau national des données sur l'eau (RNDE)                                                                                                                                                                                                                                                                                                                       |                                                                                                                                                                                                                                                                                                                                                                                                                                                                                                                   |                                                                                                                                                                                                                                                                                                         |
| Type of organisation                                                        | Governmental<br>Founded 1992                                                                                                                                                                                                                                                                                                                                                          |                                                                                                                                                                                                                                                                                                                                                                                                                                                                                                                   |                                                                                                                                                                                                                                                                                                         |
| Coordinates                                                                 | Office national de l'eau et des milieux aquatiques<br>16 avenue Louison Bobet<br>94132 Fontenay-sous-Bois cedex                                                                                                                                                                                                                                                                       |                                                                                                                                                                                                                                                                                                                                                                                                                                                                                                                   |                                                                                                                                                                                                                                                                                                         |
| Website                                                                     | <a href="http://www.eaufrance.fr/observer-et-evaluer/etat-des-milieux/reseaux-d-observation/">http://www.eaufrance.fr/observer-et-evaluer/etat-des-milieux/reseaux-d-observation/</a>                                                                                                                                                                                                 |                                                                                                                                                                                                                                                                                                                                                                                                                                                                                                                   |                                                                                                                                                                                                                                                                                                         |
| Funding                                                                     | public                                                                                                                                                                                                                                                                                                                                                                                |                                                                                                                                                                                                                                                                                                                                                                                                                                                                                                                   |                                                                                                                                                                                                                                                                                                         |
| Conflict of interest                                                        | -                                                                                                                                                                                                                                                                                                                                                                                     |                                                                                                                                                                                                                                                                                                                                                                                                                                                                                                                   |                                                                                                                                                                                                                                                                                                         |
| Part of other network(s)                                                    | Coordinated by the 'Office national de l'eau et des milieux aquatiques' (ONEMA), since 2006                                                                                                                                                                                                                                                                                           |                                                                                                                                                                                                                                                                                                                                                                                                                                                                                                                   |                                                                                                                                                                                                                                                                                                         |
| Grouping other network(s)                                                   | Portal to several networks<br>Regional and departmental parties                                                                                                                                                                                                                                                                                                                       |                                                                                                                                                                                                                                                                                                                                                                                                                                                                                                                   |                                                                                                                                                                                                                                                                                                         |
| <b>MONITORING SUBJECT</b>                                                   |                                                                                                                                                                                                                                                                                                                                                                                       |                                                                                                                                                                                                                                                                                                                                                                                                                                                                                                                   |                                                                                                                                                                                                                                                                                                         |
| Description                                                                 | Portal site to facilitate access to public information in the field of water in France: a.o. links to websites disseminating data observation and evaluation                                                                                                                                                                                                                          |                                                                                                                                                                                                                                                                                                                                                                                                                                                                                                                   |                                                                                                                                                                                                                                                                                                         |
| Protection goal(s) and/or influencing factor(s)                             | <input checked="" type="checkbox"/> Protection goal<br><br><input type="checkbox"/> Biodiversity: fish<br><input type="checkbox"/> Human Health<br><input type="checkbox"/> Animal Health<br><input type="checkbox"/> Plant Health<br><input type="checkbox"/> Soil function<br><input checked="" type="checkbox"/> Water quality<br><input type="checkbox"/> Sustainable Agriculture | <input type="checkbox"/> Influencing factor<br><br><input type="checkbox"/> Agronomic practice<br><input type="checkbox"/> Plant protection<br><input type="checkbox"/> GMO cultivation<br><input type="checkbox"/> Environmental conditions                                                                                                                                                                                                                                                                      |                                                                                                                                                                                                                                                                                                         |
| Duplication of Farmer's questionnaire                                       | <input checked="" type="checkbox"/> No duplication<br><input type="checkbox"/> Partly duplication<br><input type="checkbox"/> Complete duplication                                                                                                                                                                                                                                    |                                                                                                                                                                                                                                                                                                                                                                                                                                                                                                                   |                                                                                                                                                                                                                                                                                                         |
| <b>SPECIFICITY</b>                                                          |                                                                                                                                                                                                                                                                                                                                                                                       |                                                                                                                                                                                                                                                                                                                                                                                                                                                                                                                   |                                                                                                                                                                                                                                                                                                         |
| Geography                                                                   | <input type="checkbox"/> EU -wide<br><br><input type="checkbox"/> Zone A – North<br><input type="checkbox"/> Zone B – Centre:<br><input type="checkbox"/> Zone C – South                                                                                                                                                                                                              |                                                                                                                                                                                                                                                                                                                                                                                                                                                                                                                   |                                                                                                                                                                                                                                                                                                         |
|                                                                             | <input type="checkbox"/> Denmark,<br><input type="checkbox"/> Estonia,<br><input type="checkbox"/> Latvia,<br><input type="checkbox"/> Lithuania,<br><input type="checkbox"/> Finland,<br><input type="checkbox"/> Sweden                                                                                                                                                             | <input type="checkbox"/> Belgium,<br><input type="checkbox"/> Czech Republic<br><input type="checkbox"/> Germany,<br><input type="checkbox"/> Ireland,<br><input type="checkbox"/> Luxembourg,<br><input type="checkbox"/> Hungary,<br><input type="checkbox"/> Netherlands,<br><input type="checkbox"/> Austria,<br><input type="checkbox"/> Poland,<br><input type="checkbox"/> Romania,<br><input type="checkbox"/> Slovenia,<br><input type="checkbox"/> Slovakia,<br><input type="checkbox"/> United Kingdom | <input type="checkbox"/> Bulgaria,<br><input type="checkbox"/> Greece,<br><input type="checkbox"/> Spain,<br><input checked="" type="checkbox"/> France,<br><input type="checkbox"/> Italy,<br><input type="checkbox"/> Cyprus,<br><input type="checkbox"/> Malta,<br><input type="checkbox"/> Portugal |
|                                                                             | <input type="checkbox"/> Regional (specify)<br><input type="checkbox"/> Local (Specify)                                                                                                                                                                                                                                                                                               |                                                                                                                                                                                                                                                                                                                                                                                                                                                                                                                   |                                                                                                                                                                                                                                                                                                         |
| Factors                                                                     | <input type="checkbox"/> Multiple species/items (specify)<br><input type="checkbox"/> Single species/item (specify)                                                                                                                                                                                                                                                                   |                                                                                                                                                                                                                                                                                                                                                                                                                                                                                                                   |                                                                                                                                                                                                                                                                                                         |
| Crop                                                                        | <input checked="" type="checkbox"/> No specific crop(s)<br><input type="checkbox"/> Several crops (e.g. all cereals)<br><input type="checkbox"/> Single crop                                                                                                                                                                                                                          |                                                                                                                                                                                                                                                                                                                                                                                                                                                                                                                   |                                                                                                                                                                                                                                                                                                         |
| Trait /treatment                                                            | <input checked="" type="checkbox"/> No specific traits/treatments<br><input type="checkbox"/> Several traits/treatments<br><input type="checkbox"/> Single trait/treatment                                                                                                                                                                                                            |                                                                                                                                                                                                                                                                                                                                                                                                                                                                                                                   |                                                                                                                                                                                                                                                                                                         |
| GMO                                                                         | <input checked="" type="checkbox"/> No GMO bias<br><input type="checkbox"/> GMO specific                                                                                                                                                                                                                                                                                              |                                                                                                                                                                                                                                                                                                                                                                                                                                                                                                                   |                                                                                                                                                                                                                                                                                                         |
| <b>METHODOLOGY</b>                                                          |                                                                                                                                                                                                                                                                                                                                                                                       |                                                                                                                                                                                                                                                                                                                                                                                                                                                                                                                   |                                                                                                                                                                                                                                                                                                         |

|                                                                                                                                                                                                                           |                                                                                                                                                                                                                                                                        |
|---------------------------------------------------------------------------------------------------------------------------------------------------------------------------------------------------------------------------|------------------------------------------------------------------------------------------------------------------------------------------------------------------------------------------------------------------------------------------------------------------------|
| Observations                                                                                                                                                                                                              | <input checked="" type="checkbox"/> Reported, verifiable methodology<br><input type="checkbox"/> Reported, unverifiable methodology<br><input type="checkbox"/> Unknown, unverifiable methodology                                                                      |
| Frequency                                                                                                                                                                                                                 | <input checked="" type="checkbox"/> > 1 time/year<br><input type="checkbox"/> 1 time/year<br><input type="checkbox"/> < 1 time/year                                                                                                                                    |
| Future                                                                                                                                                                                                                    | <input checked="" type="checkbox"/> For $\geq 5$ years<br><input type="checkbox"/> between 1 and 5 years<br><input type="checkbox"/> no prospect                                                                                                                       |
| Quality of performers                                                                                                                                                                                                     | <input checked="" type="checkbox"/> Trained, professionals<br><input type="checkbox"/> Trained, non-professionals –<br><input type="checkbox"/> Uncertain or not -specified                                                                                            |
| Quality of data                                                                                                                                                                                                           | <input checked="" type="checkbox"/> Standard recording of raw data<br><input type="checkbox"/> Free recording of raw data<br><input type="checkbox"/> Anecdotic                                                                                                        |
| Analysis                                                                                                                                                                                                                  | <input type="checkbox"/> Reported, verifiable methodology<br><input type="checkbox"/> Reported, unverifiable methodology<br><input checked="" type="checkbox"/> Unknown, unverifiable methodology                                                                      |
| Quality of analysis                                                                                                                                                                                                       | <input type="checkbox"/> Scientifically based<br><input type="checkbox"/> Indicative only<br><input checked="" type="checkbox"/> Unknown                                                                                                                               |
| <b>REPORTING</b>                                                                                                                                                                                                          |                                                                                                                                                                                                                                                                        |
| Language                                                                                                                                                                                                                  | <input type="checkbox"/> Specify reporting language(s): French, sometimes also in English                                                                                                                                                                              |
| Availability                                                                                                                                                                                                              | <input type="checkbox"/> Scientific publication<br><input checked="" type="checkbox"/> Official report available on the internet or in other public forum<br><input type="checkbox"/> Official report available from network<br><input type="checkbox"/> Not available |
| Frequency                                                                                                                                                                                                                 | <input checked="" type="checkbox"/> $\geq 1$ time/year –<br><input type="checkbox"/> < 1 time/year –                                                                                                                                                                   |
| Historical reference                                                                                                                                                                                                      | <input checked="" type="checkbox"/> over $\geq 5$ years<br><input type="checkbox"/> between 1 and 5 years<br><input type="checkbox"/> no historical analysis                                                                                                           |
| <b>COMMENT(S)</b>                                                                                                                                                                                                         |                                                                                                                                                                                                                                                                        |
| Collection of documents and reports on water quality in a broad sense including the analysis of the human impact. The ecological status is performed by counting fish, diatoms, aquatic plants, macro-invertebrates, etc. |                                                                                                                                                                                                                                                                        |

## Germany

## GSEN-09-0051.00.3 DE – Tagfalter

| EuropaBio's coordinated approach to General Surveillance: Existing Networks |                                                                                                                                                                                                                                                                                                                                                                                                                                                                                                                                                                                      |                                                                                                                                                                                                                                              |  |
|-----------------------------------------------------------------------------|--------------------------------------------------------------------------------------------------------------------------------------------------------------------------------------------------------------------------------------------------------------------------------------------------------------------------------------------------------------------------------------------------------------------------------------------------------------------------------------------------------------------------------------------------------------------------------------|----------------------------------------------------------------------------------------------------------------------------------------------------------------------------------------------------------------------------------------------|--|
| ORGANISATION                                                                |                                                                                                                                                                                                                                                                                                                                                                                                                                                                                                                                                                                      |                                                                                                                                                                                                                                              |  |
| EuropaBio reference                                                         | GS-EN-09-0051                                                                                                                                                                                                                                                                                                                                                                                                                                                                                                                                                                        |                                                                                                                                                                                                                                              |  |
| Official name of the Network                                                | Tagfalter-Monitoring Deutschland                                                                                                                                                                                                                                                                                                                                                                                                                                                                                                                                                     |                                                                                                                                                                                                                                              |  |
| Other names                                                                 | German butterfly monitoring (TMD)                                                                                                                                                                                                                                                                                                                                                                                                                                                                                                                                                    |                                                                                                                                                                                                                                              |  |
| Type of organisation                                                        | Nature conservation<br>Founded 2005                                                                                                                                                                                                                                                                                                                                                                                                                                                                                                                                                  |                                                                                                                                                                                                                                              |  |
| Coordinates                                                                 | Helmholtz-Zentrum für Umweltforschung – UFZ<br>Permoserstr. 15<br>04318 Leipzig<br><br>Fax: (0341) 235-2649<br><a href="mailto:Info[at]ufz.de">Info[at]ufz.de</a>                                                                                                                                                                                                                                                                                                                                                                                                                    |                                                                                                                                                                                                                                              |  |
| Website                                                                     | <a href="http://www.tagfalter-monitoring.de/">http://www.tagfalter-monitoring.de/</a>                                                                                                                                                                                                                                                                                                                                                                                                                                                                                                |                                                                                                                                                                                                                                              |  |
| Funding                                                                     | Helmholtz-Zentrum für Umweltforschung                                                                                                                                                                                                                                                                                                                                                                                                                                                                                                                                                |                                                                                                                                                                                                                                              |  |
| Conflict of interest                                                        | -                                                                                                                                                                                                                                                                                                                                                                                                                                                                                                                                                                                    |                                                                                                                                                                                                                                              |  |
| Part of other network(s)                                                    | Butterfly Conservation Europe<br>Collaboration with<br>NABU and<br>BUND                                                                                                                                                                                                                                                                                                                                                                                                                                                                                                              |                                                                                                                                                                                                                                              |  |
| Grouping other network(s)                                                   | Local workgroups                                                                                                                                                                                                                                                                                                                                                                                                                                                                                                                                                                     |                                                                                                                                                                                                                                              |  |
| MONITORING SUBJECT                                                          |                                                                                                                                                                                                                                                                                                                                                                                                                                                                                                                                                                                      |                                                                                                                                                                                                                                              |  |
| Description                                                                 | Monitoring and collecting distribution data of butterflies                                                                                                                                                                                                                                                                                                                                                                                                                                                                                                                           |                                                                                                                                                                                                                                              |  |
| Protection goal(s) and/or influencing factor(s)                             | <input checked="" type="checkbox"/> Protection goal<br><br><input checked="" type="checkbox"/> Biodiversity: butterflies<br><input type="checkbox"/> Human Health<br><input type="checkbox"/> Animal Health<br><input type="checkbox"/> Plant Health<br><input type="checkbox"/> Soil function<br><input type="checkbox"/> Water quality<br><input type="checkbox"/> Sustainable Agriculture                                                                                                                                                                                         | <input type="checkbox"/> Influencing factor<br><br><input type="checkbox"/> Agronomic practice<br><input type="checkbox"/> Plant protection<br><input type="checkbox"/> GMO cultivation<br><input type="checkbox"/> Environmental conditions |  |
| Duplication of Farmer's questionnaire                                       | <input checked="" type="checkbox"/> No duplication<br><input type="checkbox"/> Partly duplication<br><input type="checkbox"/> Complete duplication                                                                                                                                                                                                                                                                                                                                                                                                                                   |                                                                                                                                                                                                                                              |  |
| SPECIFICITY                                                                 |                                                                                                                                                                                                                                                                                                                                                                                                                                                                                                                                                                                      |                                                                                                                                                                                                                                              |  |
| Geography                                                                   | <input type="checkbox"/> EU -wide<br><br><input type="checkbox"/> Zone A – North<br><input type="checkbox"/> Denmark,<br><input type="checkbox"/> Estonia,<br><input type="checkbox"/> Latvia,<br><input type="checkbox"/> Lithuania,<br><input type="checkbox"/> Finland,<br><input type="checkbox"/> Sweden                                                                                                                                                                                                                                                                        |                                                                                                                                                                                                                                              |  |
|                                                                             | <input checked="" type="checkbox"/> Zone B – Centre:<br><input type="checkbox"/> Belgium,<br><input type="checkbox"/> Czech Republic<br><input checked="" type="checkbox"/> Germany,<br><input type="checkbox"/> Ireland,<br><input type="checkbox"/> Luxembourg,<br><input type="checkbox"/> Hungary,<br><input type="checkbox"/> Netherlands,<br><input type="checkbox"/> Austria,<br><input type="checkbox"/> Poland,<br><input type="checkbox"/> Romania,<br><input type="checkbox"/> Slovenia,<br><input type="checkbox"/> Slovakia,<br><input type="checkbox"/> United Kingdom |                                                                                                                                                                                                                                              |  |
|                                                                             | <input type="checkbox"/> Zone C – South<br><input type="checkbox"/> Bulgaria,<br><input type="checkbox"/> Greece,<br><input type="checkbox"/> Spain,<br><input type="checkbox"/> France,<br><input type="checkbox"/> Italy,<br><input type="checkbox"/> Cyprus,<br><input type="checkbox"/> Malta,<br><input type="checkbox"/> Portugal                                                                                                                                                                                                                                              |                                                                                                                                                                                                                                              |  |
|                                                                             | <input type="checkbox"/> Regional (specify)<br><input type="checkbox"/> Local (specify)                                                                                                                                                                                                                                                                                                                                                                                                                                                                                              |                                                                                                                                                                                                                                              |  |
| Factors                                                                     | <input checked="" type="checkbox"/> Multiple species/items (specify) butterflies<br><input type="checkbox"/> Single species/item (specify)                                                                                                                                                                                                                                                                                                                                                                                                                                           |                                                                                                                                                                                                                                              |  |
| Crop                                                                        | <input checked="" type="checkbox"/> No specific crop(s)<br><input type="checkbox"/> Several crops (e.g. all cereals)<br><input type="checkbox"/> Single crop                                                                                                                                                                                                                                                                                                                                                                                                                         |                                                                                                                                                                                                                                              |  |
| Trait /treatment                                                            | <input checked="" type="checkbox"/> No specific traits/treatments<br><input type="checkbox"/> Several traits/treatments<br><input type="checkbox"/> Single trait/treatment                                                                                                                                                                                                                                                                                                                                                                                                           |                                                                                                                                                                                                                                              |  |
| GMO                                                                         | <input checked="" type="checkbox"/> No GMO bias                                                                                                                                                                                                                                                                                                                                                                                                                                                                                                                                      |                                                                                                                                                                                                                                              |  |

|                                                                                                                |                                                                                                                                                                                                                                                                        |
|----------------------------------------------------------------------------------------------------------------|------------------------------------------------------------------------------------------------------------------------------------------------------------------------------------------------------------------------------------------------------------------------|
|                                                                                                                | <input type="checkbox"/> GMO specific                                                                                                                                                                                                                                  |
| <b>METHODOLOGY</b>                                                                                             |                                                                                                                                                                                                                                                                        |
| Observations                                                                                                   | <input checked="" type="checkbox"/> Reported, verifiable methodology<br><input type="checkbox"/> Reported, unverifiable methodology<br><input type="checkbox"/> Unknown, unverifiable methodology                                                                      |
| Frequency                                                                                                      | <input checked="" type="checkbox"/> > 1 time/year<br><input type="checkbox"/> 1 time/year<br><input type="checkbox"/> < 1 time/year                                                                                                                                    |
| Future                                                                                                         | <input checked="" type="checkbox"/> For ≥ 5 years<br><input type="checkbox"/> between 1 and 5 years<br><input type="checkbox"/> no prospect                                                                                                                            |
| Quality of performers                                                                                          | <input type="checkbox"/> Trained, professionals<br><input checked="" type="checkbox"/> Trained, non-professionals – training by documentation, volunteers<br><input type="checkbox"/> Uncertain or not -specified                                                      |
| Quality of data                                                                                                | <input checked="" type="checkbox"/> Standard recording of raw data<br><input type="checkbox"/> Free recording of raw data<br><input type="checkbox"/> Anecdotic                                                                                                        |
| Analysis                                                                                                       | <input checked="" type="checkbox"/> Reported, verifiable methodology<br><input type="checkbox"/> Reported, unverifiable methodology<br><input type="checkbox"/> Unknown, unverifiable methodology                                                                      |
| Quality of analysis                                                                                            | <input checked="" type="checkbox"/> Scientifically based<br><input type="checkbox"/> Indicative only<br><input type="checkbox"/> Unknown                                                                                                                               |
| <b>REPORTING</b>                                                                                               |                                                                                                                                                                                                                                                                        |
| Language                                                                                                       | Reporting language(s): German                                                                                                                                                                                                                                          |
| Availability                                                                                                   | <input type="checkbox"/> Scientific publication<br><input checked="" type="checkbox"/> Official report available on the internet or in other public forum<br><input type="checkbox"/> Official report available from network<br><input type="checkbox"/> Not available |
| Frequency                                                                                                      | <input checked="" type="checkbox"/> ≥ 1 time/year – Last yearly report dates 2007<br><input type="checkbox"/> < 1 time/year – Database transect per species or on local findings; distribution maps                                                                    |
| Historical reference                                                                                           | <input type="checkbox"/> over ≥ 5 years<br><input checked="" type="checkbox"/> between 1 and 5 years<br><input type="checkbox"/> no historical analysis                                                                                                                |
| <b>COMMENT(S)</b>                                                                                              |                                                                                                                                                                                                                                                                        |
| An established monitoring network using selected species as representative indicators and as protection goals. |                                                                                                                                                                                                                                                                        |

## GSEN-09-0052.00.2 DE – DDA

| EuropaBio's coordinated approach to General Surveillance: Existing Networks |                                                                                                                                                                                                                                                                                                                             |                                                                                                                                                                                                                                                                                                                                                                                                                                                                                                                              |                                                                                                                                                                                                                                                                                              |
|-----------------------------------------------------------------------------|-----------------------------------------------------------------------------------------------------------------------------------------------------------------------------------------------------------------------------------------------------------------------------------------------------------------------------|------------------------------------------------------------------------------------------------------------------------------------------------------------------------------------------------------------------------------------------------------------------------------------------------------------------------------------------------------------------------------------------------------------------------------------------------------------------------------------------------------------------------------|----------------------------------------------------------------------------------------------------------------------------------------------------------------------------------------------------------------------------------------------------------------------------------------------|
| ORGANISATION                                                                |                                                                                                                                                                                                                                                                                                                             |                                                                                                                                                                                                                                                                                                                                                                                                                                                                                                                              |                                                                                                                                                                                                                                                                                              |
| EuropaBio reference                                                         | GS-EN-09-0052                                                                                                                                                                                                                                                                                                               |                                                                                                                                                                                                                                                                                                                                                                                                                                                                                                                              |                                                                                                                                                                                                                                                                                              |
| Official name of the Network                                                | <b>Dachverband Deutscher Avifaunisten (DDA) e.V.</b>                                                                                                                                                                                                                                                                        |                                                                                                                                                                                                                                                                                                                                                                                                                                                                                                                              |                                                                                                                                                                                                                                                                                              |
| Other names                                                                 | German Ornithologists Society, Umbrella organisation German avifaunists                                                                                                                                                                                                                                                     |                                                                                                                                                                                                                                                                                                                                                                                                                                                                                                                              |                                                                                                                                                                                                                                                                                              |
| Type of organisation                                                        | Nature conservation<br>Founded 2005                                                                                                                                                                                                                                                                                         |                                                                                                                                                                                                                                                                                                                                                                                                                                                                                                                              |                                                                                                                                                                                                                                                                                              |
| Coordinates                                                                 | Zerbster Str. 7,<br>39264 Steckby                                                                                                                                                                                                                                                                                           |                                                                                                                                                                                                                                                                                                                                                                                                                                                                                                                              |                                                                                                                                                                                                                                                                                              |
| Website                                                                     | <a href="http://www.dda-web.de/">http://www.dda-web.de/</a>                                                                                                                                                                                                                                                                 |                                                                                                                                                                                                                                                                                                                                                                                                                                                                                                                              |                                                                                                                                                                                                                                                                                              |
| Funding                                                                     | Ministry of Environment                                                                                                                                                                                                                                                                                                     |                                                                                                                                                                                                                                                                                                                                                                                                                                                                                                                              |                                                                                                                                                                                                                                                                                              |
| Conflict of interest                                                        | -                                                                                                                                                                                                                                                                                                                           |                                                                                                                                                                                                                                                                                                                                                                                                                                                                                                                              |                                                                                                                                                                                                                                                                                              |
| Part of other network(s)                                                    |                                                                                                                                                                                                                                                                                                                             |                                                                                                                                                                                                                                                                                                                                                                                                                                                                                                                              |                                                                                                                                                                                                                                                                                              |
| Grouping other network(s)                                                   | Local workgroups                                                                                                                                                                                                                                                                                                            |                                                                                                                                                                                                                                                                                                                                                                                                                                                                                                                              |                                                                                                                                                                                                                                                                                              |
| MONITORING SUBJECT                                                          |                                                                                                                                                                                                                                                                                                                             |                                                                                                                                                                                                                                                                                                                                                                                                                                                                                                                              |                                                                                                                                                                                                                                                                                              |
| Description                                                                 | Monitoring and collecting distribution data of butterflies                                                                                                                                                                                                                                                                  |                                                                                                                                                                                                                                                                                                                                                                                                                                                                                                                              |                                                                                                                                                                                                                                                                                              |
| Protection goal(s) and/or influencing factor(s)                             | <input checked="" type="checkbox"/> Protection goal                                                                                                                                                                                                                                                                         | <input type="checkbox"/> Influencing factor                                                                                                                                                                                                                                                                                                                                                                                                                                                                                  |                                                                                                                                                                                                                                                                                              |
|                                                                             | <input checked="" type="checkbox"/> Biodiversity: Birds<br><input type="checkbox"/> Human Health<br><input type="checkbox"/> Animal Health<br><input type="checkbox"/> Plant Health<br><input type="checkbox"/> Soil function<br><input type="checkbox"/> Water quality<br><input type="checkbox"/> Sustainable Agriculture | <input type="checkbox"/> Agronomic practice<br><input type="checkbox"/> Plant protection<br><input type="checkbox"/> GMO cultivation<br><input type="checkbox"/> Environmental conditions                                                                                                                                                                                                                                                                                                                                    |                                                                                                                                                                                                                                                                                              |
| Duplication of Farmer's questionnaire                                       | <input checked="" type="checkbox"/> No duplication<br><input type="checkbox"/> Partly duplication<br><input type="checkbox"/> Complete duplication                                                                                                                                                                          |                                                                                                                                                                                                                                                                                                                                                                                                                                                                                                                              |                                                                                                                                                                                                                                                                                              |
| SPECIFICITY                                                                 |                                                                                                                                                                                                                                                                                                                             |                                                                                                                                                                                                                                                                                                                                                                                                                                                                                                                              |                                                                                                                                                                                                                                                                                              |
| Geography                                                                   | <input type="checkbox"/> EU -wide                                                                                                                                                                                                                                                                                           |                                                                                                                                                                                                                                                                                                                                                                                                                                                                                                                              |                                                                                                                                                                                                                                                                                              |
|                                                                             | <input type="checkbox"/> Zone A – North                                                                                                                                                                                                                                                                                     | <input checked="" type="checkbox"/> Zone B – Centre:                                                                                                                                                                                                                                                                                                                                                                                                                                                                         | <input type="checkbox"/> Zone C – South                                                                                                                                                                                                                                                      |
|                                                                             | <input type="checkbox"/> Denmark,<br><input type="checkbox"/> Estonia,<br><input type="checkbox"/> Latvia,<br><input type="checkbox"/> Lithuania,<br><input type="checkbox"/> Finland,<br><input type="checkbox"/> Sweden                                                                                                   | <input type="checkbox"/> Belgium,<br><input type="checkbox"/> Czech Republic<br><input checked="" type="checkbox"/> Germany,<br><input type="checkbox"/> Ireland,<br><input type="checkbox"/> Luxembourg,<br><input type="checkbox"/> Hungary,<br><input type="checkbox"/> Netherlands,<br><input type="checkbox"/> Austria,<br><input type="checkbox"/> Poland,<br><input type="checkbox"/> Romania,<br><input type="checkbox"/> Slovenia,<br><input type="checkbox"/> Slovakia,<br><input type="checkbox"/> United Kingdom | <input type="checkbox"/> Bulgaria,<br><input type="checkbox"/> Greece,<br><input type="checkbox"/> Spain,<br><input type="checkbox"/> France,<br><input type="checkbox"/> Italy,<br><input type="checkbox"/> Cyprus,<br><input type="checkbox"/> Malta,<br><input type="checkbox"/> Portugal |
|                                                                             | <input type="checkbox"/> Regional (specify)<br><input type="checkbox"/> Local (specify)                                                                                                                                                                                                                                     |                                                                                                                                                                                                                                                                                                                                                                                                                                                                                                                              |                                                                                                                                                                                                                                                                                              |
| Factors                                                                     | <input checked="" type="checkbox"/> Multiple species/items (specify) birds<br><input type="checkbox"/> Single species/item (specify)                                                                                                                                                                                        |                                                                                                                                                                                                                                                                                                                                                                                                                                                                                                                              |                                                                                                                                                                                                                                                                                              |
| Crop                                                                        | <input checked="" type="checkbox"/> No specific crop(s)<br><input type="checkbox"/> Several crops (e.g. all cereals)<br><input type="checkbox"/> Single crop                                                                                                                                                                |                                                                                                                                                                                                                                                                                                                                                                                                                                                                                                                              |                                                                                                                                                                                                                                                                                              |
| Trait /treatment                                                            | <input checked="" type="checkbox"/> No specific traits/treatments<br><input type="checkbox"/> Several traits/treatments<br><input type="checkbox"/> Single trait/treatment                                                                                                                                                  |                                                                                                                                                                                                                                                                                                                                                                                                                                                                                                                              |                                                                                                                                                                                                                                                                                              |
| GMO                                                                         | <input checked="" type="checkbox"/> No GMO bias<br><input type="checkbox"/> GMO specific                                                                                                                                                                                                                                    |                                                                                                                                                                                                                                                                                                                                                                                                                                                                                                                              |                                                                                                                                                                                                                                                                                              |
| METHODOLOGY                                                                 |                                                                                                                                                                                                                                                                                                                             |                                                                                                                                                                                                                                                                                                                                                                                                                                                                                                                              |                                                                                                                                                                                                                                                                                              |
| Observations                                                                | <input checked="" type="checkbox"/> Reported, verifiable methodology<br><input type="checkbox"/> Reported, unverifiable methodology<br><input type="checkbox"/> Unknown, unverifiable methodology                                                                                                                           |                                                                                                                                                                                                                                                                                                                                                                                                                                                                                                                              |                                                                                                                                                                                                                                                                                              |
| Frequency                                                                   | <input checked="" type="checkbox"/> > 1 time/year                                                                                                                                                                                                                                                                           |                                                                                                                                                                                                                                                                                                                                                                                                                                                                                                                              |                                                                                                                                                                                                                                                                                              |

|                                                                                                                                                                  |                                                                                                                                                                                                                                                                                                         |
|------------------------------------------------------------------------------------------------------------------------------------------------------------------|---------------------------------------------------------------------------------------------------------------------------------------------------------------------------------------------------------------------------------------------------------------------------------------------------------|
|                                                                                                                                                                  | <input type="checkbox"/> 1 time/year<br><input type="checkbox"/> < 1 time/year                                                                                                                                                                                                                          |
| Future                                                                                                                                                           | <input checked="" type="checkbox"/> For $\geq$ 5 years<br><input type="checkbox"/> between 1 and 5 years<br><input type="checkbox"/> no prospect                                                                                                                                                        |
| Quality of performers                                                                                                                                            | <input type="checkbox"/> Trained, professionals<br><input checked="" type="checkbox"/> Trained, non-professionals – training by documentation, volunteers<br><input type="checkbox"/> Uncertain or not -specified                                                                                       |
| Quality of data                                                                                                                                                  | <input checked="" type="checkbox"/> Standard recording of raw data<br><input type="checkbox"/> Free recording of raw data<br><input type="checkbox"/> Anecdotic                                                                                                                                         |
| Analysis                                                                                                                                                         | <input checked="" type="checkbox"/> Reported, verifiable methodology<br><input type="checkbox"/> Reported, unverifiable methodology<br><input type="checkbox"/> Unknown, unverifiable methodology                                                                                                       |
| Quality of analysis                                                                                                                                              | <input checked="" type="checkbox"/> Scientifically based<br><input type="checkbox"/> Indicative only<br><input type="checkbox"/> Unknown                                                                                                                                                                |
| <b>REPORTING</b>                                                                                                                                                 |                                                                                                                                                                                                                                                                                                         |
| Language                                                                                                                                                         | Reporting language(s): German                                                                                                                                                                                                                                                                           |
| Availability                                                                                                                                                     | <input checked="" type="checkbox"/> Scientific publication<br><input checked="" type="checkbox"/> Official report available on the internet or in other public forum<br><input checked="" type="checkbox"/> Official report available from network<br><input checked="" type="checkbox"/> Not available |
| Frequency                                                                                                                                                        | <input checked="" type="checkbox"/> $\geq$ 1 time/year – Last yearly report dates 2007<br><input type="checkbox"/> < 1 time/year – Database transect per species or on local findings; distribution maps                                                                                                |
| Historical reference                                                                                                                                             | <input type="checkbox"/> over $\geq$ 5 years<br><input checked="" type="checkbox"/> between 1 and 5 years<br><input type="checkbox"/> no historical analysis                                                                                                                                            |
| <b>COMMENT(S)</b>                                                                                                                                                |                                                                                                                                                                                                                                                                                                         |
| Specific scientific publication only accessible by subscription. Monitoring network using selected species as representative indicators and as protection goals. |                                                                                                                                                                                                                                                                                                         |



## GSEN-09-0053.00.3 DE – AI Bienforschung

| EuropaBio's coordinated approach to General Surveillance: Existing Networks |                                                                                                                                                                                                                                                                                                                                                                                                                                                                                                                                                                                      |                                                                                                                                                                                                                                                                                                                                         |  |
|-----------------------------------------------------------------------------|--------------------------------------------------------------------------------------------------------------------------------------------------------------------------------------------------------------------------------------------------------------------------------------------------------------------------------------------------------------------------------------------------------------------------------------------------------------------------------------------------------------------------------------------------------------------------------------|-----------------------------------------------------------------------------------------------------------------------------------------------------------------------------------------------------------------------------------------------------------------------------------------------------------------------------------------|--|
| <b>ORGANISATION</b>                                                         |                                                                                                                                                                                                                                                                                                                                                                                                                                                                                                                                                                                      |                                                                                                                                                                                                                                                                                                                                         |  |
| EuropaBio reference                                                         | GS-EN-09-0053                                                                                                                                                                                                                                                                                                                                                                                                                                                                                                                                                                        |                                                                                                                                                                                                                                                                                                                                         |  |
| Official name of the Network                                                | <b>Arbeitsgemeinschaft der Institute für Bienforschung e.V.</b>                                                                                                                                                                                                                                                                                                                                                                                                                                                                                                                      |                                                                                                                                                                                                                                                                                                                                         |  |
| Other names                                                                 | Society of the German Bee Research Institutes                                                                                                                                                                                                                                                                                                                                                                                                                                                                                                                                        |                                                                                                                                                                                                                                                                                                                                         |  |
| Type of organisation                                                        | Academic<br>Founded 1949                                                                                                                                                                                                                                                                                                                                                                                                                                                                                                                                                             |                                                                                                                                                                                                                                                                                                                                         |  |
| Coordinates                                                                 | Nds. Landesamt für Verbraucherschutz und Lebensmittelsicherheit<br>Institut für Bienkunde<br>Herzogin-Eleonore-Allee 5<br>29221 Celle<br><br>Fax : 0 51 41/ 9 05 03-44<br>Email : poststelle.ib-ce[at]laves.niedersachsen.de                                                                                                                                                                                                                                                                                                                                                         |                                                                                                                                                                                                                                                                                                                                         |  |
| Website                                                                     | <a href="http://www.ag-bienforschung.de/">www.ag-bienforschung.de/</a>                                                                                                                                                                                                                                                                                                                                                                                                                                                                                                               |                                                                                                                                                                                                                                                                                                                                         |  |
| Funding                                                                     | Fee by member institutes                                                                                                                                                                                                                                                                                                                                                                                                                                                                                                                                                             |                                                                                                                                                                                                                                                                                                                                         |  |
| Conflict of interest                                                        | -                                                                                                                                                                                                                                                                                                                                                                                                                                                                                                                                                                                    |                                                                                                                                                                                                                                                                                                                                         |  |
| Part of other network(s)                                                    |                                                                                                                                                                                                                                                                                                                                                                                                                                                                                                                                                                                      |                                                                                                                                                                                                                                                                                                                                         |  |
| Grouping other network(s)                                                   | 22 Institutes                                                                                                                                                                                                                                                                                                                                                                                                                                                                                                                                                                        |                                                                                                                                                                                                                                                                                                                                         |  |
| <b>MONITORING SUBJECT</b>                                                   |                                                                                                                                                                                                                                                                                                                                                                                                                                                                                                                                                                                      |                                                                                                                                                                                                                                                                                                                                         |  |
| Description                                                                 | Research on bees, pathology, products and protection of bees                                                                                                                                                                                                                                                                                                                                                                                                                                                                                                                         |                                                                                                                                                                                                                                                                                                                                         |  |
| Protection goal(s) and/or influencing factor(s)                             | <input checked="" type="checkbox"/> Protection goal<br><br><input checked="" type="checkbox"/> Biodiversity: Insects<br><input type="checkbox"/> Human Health<br><input type="checkbox"/> Animal Health<br><input type="checkbox"/> Plant Health<br><input type="checkbox"/> Soil function<br><input type="checkbox"/> Water quality<br><input type="checkbox"/> Sustainable Agriculture                                                                                                                                                                                             | <input type="checkbox"/> Influencing factor<br><br><input type="checkbox"/> Agronomic practice<br><input type="checkbox"/> Plant protection<br><input type="checkbox"/> GMO cultivation<br><input type="checkbox"/> Environmental conditions                                                                                            |  |
| Duplication of Farmer's questionnaire                                       | <input checked="" type="checkbox"/> No duplication<br><input type="checkbox"/> Partly duplication<br><input type="checkbox"/> Complete duplication                                                                                                                                                                                                                                                                                                                                                                                                                                   |                                                                                                                                                                                                                                                                                                                                         |  |
| <b>SPECIFICITY</b>                                                          |                                                                                                                                                                                                                                                                                                                                                                                                                                                                                                                                                                                      |                                                                                                                                                                                                                                                                                                                                         |  |
| Geography                                                                   | <input type="checkbox"/> EU –wide<br><br><input type="checkbox"/> Zone A – North<br><input type="checkbox"/> Denmark,<br><input type="checkbox"/> Estonia,<br><input type="checkbox"/> Latvia,<br><input type="checkbox"/> Lithuania,<br><input type="checkbox"/> Finland,<br><input type="checkbox"/> Sweden                                                                                                                                                                                                                                                                        |                                                                                                                                                                                                                                                                                                                                         |  |
|                                                                             | <input checked="" type="checkbox"/> Zone B – Centre:<br><input type="checkbox"/> Belgium,<br><input type="checkbox"/> Czech Republic<br><input checked="" type="checkbox"/> Germany,<br><input type="checkbox"/> Ireland,<br><input type="checkbox"/> Luxembourg,<br><input type="checkbox"/> Hungary,<br><input type="checkbox"/> Netherlands,<br><input type="checkbox"/> Austria,<br><input type="checkbox"/> Poland,<br><input type="checkbox"/> Romania,<br><input type="checkbox"/> Slovenia,<br><input type="checkbox"/> Slovakia,<br><input type="checkbox"/> United Kingdom | <input type="checkbox"/> Zone C – South<br><input type="checkbox"/> Bulgaria,<br><input type="checkbox"/> Greece,<br><input type="checkbox"/> Spain,<br><input type="checkbox"/> France,<br><input type="checkbox"/> Italy,<br><input type="checkbox"/> Cyprus,<br><input type="checkbox"/> Malta,<br><input type="checkbox"/> Portugal |  |
|                                                                             | <input type="checkbox"/> Regional (specify)<br><input type="checkbox"/> Local (specify)                                                                                                                                                                                                                                                                                                                                                                                                                                                                                              |                                                                                                                                                                                                                                                                                                                                         |  |
| Factors                                                                     | <input type="checkbox"/> Multiple species/items (specify)<br><input checked="" type="checkbox"/> Single species/item (specify) Bees                                                                                                                                                                                                                                                                                                                                                                                                                                                  |                                                                                                                                                                                                                                                                                                                                         |  |
| Crop                                                                        | <input checked="" type="checkbox"/> No specific crop(s)<br><input type="checkbox"/> Several crops (e.g. all cereals)<br><input type="checkbox"/> Single crop                                                                                                                                                                                                                                                                                                                                                                                                                         |                                                                                                                                                                                                                                                                                                                                         |  |
| Trait /treatment                                                            | <input checked="" type="checkbox"/> No specific traits/treatments<br><input type="checkbox"/> Several traits/treatments<br><input type="checkbox"/> Single trait/treatment                                                                                                                                                                                                                                                                                                                                                                                                           |                                                                                                                                                                                                                                                                                                                                         |  |
| GMO                                                                         | <input checked="" type="checkbox"/> No GMO bias<br><input type="checkbox"/> GMO specific                                                                                                                                                                                                                                                                                                                                                                                                                                                                                             |                                                                                                                                                                                                                                                                                                                                         |  |
| <b>METHODOLOGY</b>                                                          |                                                                                                                                                                                                                                                                                                                                                                                                                                                                                                                                                                                      |                                                                                                                                                                                                                                                                                                                                         |  |

|                                                                |                                                                                                                                                                                                                                                                                               |
|----------------------------------------------------------------|-----------------------------------------------------------------------------------------------------------------------------------------------------------------------------------------------------------------------------------------------------------------------------------------------|
| Observations                                                   | <input type="checkbox"/> Reported, verifiable methodology<br><input type="checkbox"/> Reported, unverifiable methodology<br><input type="checkbox"/> Unknown, unverifiable methodology                                                                                                        |
| Frequency                                                      | <input type="checkbox"/> > 1 time/year<br><input checked="" type="checkbox"/> 1 time/year<br><input type="checkbox"/> < 1 time/year                                                                                                                                                           |
| Future                                                         | <input type="checkbox"/> For $\geq 5$ years<br><input checked="" type="checkbox"/> between 1 and 5 years<br><input type="checkbox"/> no prospect                                                                                                                                              |
| Quality of performers                                          | <input checked="" type="checkbox"/> Trained, professionals<br><input type="checkbox"/> Trained, non-professionals – training by documentation, volunteers<br><input type="checkbox"/> Uncertain or not –specified                                                                             |
| Quality of data                                                | <input checked="" type="checkbox"/> Standard recording of raw data<br><input type="checkbox"/> Free recording of raw data<br><input type="checkbox"/> Anecdotic                                                                                                                               |
| Analysis                                                       | <input checked="" type="checkbox"/> Reported, verifiable methodology<br><input type="checkbox"/> Reported, unverifiable methodology<br><input type="checkbox"/> Unknown, unverifiable methodology                                                                                             |
| Quality of analysis                                            | <input checked="" type="checkbox"/> Scientifically based<br><input type="checkbox"/> Indicative only<br><input type="checkbox"/> Unknown                                                                                                                                                      |
| <b>REPORTING</b>                                               |                                                                                                                                                                                                                                                                                               |
| Language                                                       | Reporting language(s): German                                                                                                                                                                                                                                                                 |
| Availability                                                   | <input type="checkbox"/> Scientific publication<br><input checked="" type="checkbox"/> Official report available on the internet or in other public forum (university's website)<br><input type="checkbox"/> Official report available from network<br><input type="checkbox"/> Not available |
| Frequency                                                      | <input checked="" type="checkbox"/> $\geq 1$ time/year<br><input type="checkbox"/> < 1 time/year                                                                                                                                                                                              |
| Historical reference                                           | <input type="checkbox"/> over $\geq 5$ years<br><input checked="" type="checkbox"/> between 1 and 5 years<br><input type="checkbox"/> no historical analysis                                                                                                                                  |
| <b>COMMENT(S)</b>                                              |                                                                                                                                                                                                                                                                                               |
| A research network addressing practical themes for beekeepers. |                                                                                                                                                                                                                                                                                               |

## GSEN-09-0055.00.2 DE – Deutsches Bienenmonitoring

| EuropaBio's coordinated approach to General Surveillance: Existing Networks |                                                                                                                                                                                                                                                                                                                                                                                      |                                                                                                                                                                                                                                                                                                                                                                                                                                                                                                                              |                                                                                                                                                                                                                                                                                              |
|-----------------------------------------------------------------------------|--------------------------------------------------------------------------------------------------------------------------------------------------------------------------------------------------------------------------------------------------------------------------------------------------------------------------------------------------------------------------------------|------------------------------------------------------------------------------------------------------------------------------------------------------------------------------------------------------------------------------------------------------------------------------------------------------------------------------------------------------------------------------------------------------------------------------------------------------------------------------------------------------------------------------|----------------------------------------------------------------------------------------------------------------------------------------------------------------------------------------------------------------------------------------------------------------------------------------------|
| ORGANISATION                                                                |                                                                                                                                                                                                                                                                                                                                                                                      |                                                                                                                                                                                                                                                                                                                                                                                                                                                                                                                              |                                                                                                                                                                                                                                                                                              |
| EuropaBio reference                                                         | GS-EN-09-0055                                                                                                                                                                                                                                                                                                                                                                        |                                                                                                                                                                                                                                                                                                                                                                                                                                                                                                                              |                                                                                                                                                                                                                                                                                              |
| Official name of the Network                                                | <b>Deutsches Bienenmonitoring</b>                                                                                                                                                                                                                                                                                                                                                    |                                                                                                                                                                                                                                                                                                                                                                                                                                                                                                                              |                                                                                                                                                                                                                                                                                              |
| Other names                                                                 | German bee monitoring (DEBIMO)                                                                                                                                                                                                                                                                                                                                                       |                                                                                                                                                                                                                                                                                                                                                                                                                                                                                                                              |                                                                                                                                                                                                                                                                                              |
| Type of organisation                                                        | Professional<br>Founded 2004                                                                                                                                                                                                                                                                                                                                                         |                                                                                                                                                                                                                                                                                                                                                                                                                                                                                                                              |                                                                                                                                                                                                                                                                                              |
| Coordinates                                                                 | Bayer Vital GmbH<br>Gebäude K 56<br>51368 Leverkusen                                                                                                                                                                                                                                                                                                                                 |                                                                                                                                                                                                                                                                                                                                                                                                                                                                                                                              |                                                                                                                                                                                                                                                                                              |
| Website                                                                     | <a href="http://gesundebienen.bayer.de/scripts/pages/de/home.php">http://gesundebienen.bayer.de/scripts/pages/de/home.php</a>                                                                                                                                                                                                                                                        |                                                                                                                                                                                                                                                                                                                                                                                                                                                                                                                              |                                                                                                                                                                                                                                                                                              |
| Funding                                                                     | Unknown                                                                                                                                                                                                                                                                                                                                                                              |                                                                                                                                                                                                                                                                                                                                                                                                                                                                                                                              |                                                                                                                                                                                                                                                                                              |
| Conflict of interest                                                        | -                                                                                                                                                                                                                                                                                                                                                                                    |                                                                                                                                                                                                                                                                                                                                                                                                                                                                                                                              |                                                                                                                                                                                                                                                                                              |
| Part of other network(s)                                                    |                                                                                                                                                                                                                                                                                                                                                                                      |                                                                                                                                                                                                                                                                                                                                                                                                                                                                                                                              |                                                                                                                                                                                                                                                                                              |
| Grouping other network(s)                                                   | Project advisors:<br>Bienenwissenschaftliche Einrichtungen in Celle, Freiburg, Halle,<br>Hohenheim, Hohen-Neuendorf, Kirchhain, Mayen, Münster und Veitshöchheim<br>Deutscher Imkerbund e.V. (DIB)<br>Deutscher Berufs- und Erwerbsimkerbund e.V. (DBIB)<br>Deutscher Bauernverband e.V.<br>BASF Aktiengesellschaft<br>Bayer CropScience AG<br>Bayer HealthCare AG<br>Syngenta AG    |                                                                                                                                                                                                                                                                                                                                                                                                                                                                                                                              |                                                                                                                                                                                                                                                                                              |
| MONITORING SUBJECT                                                          |                                                                                                                                                                                                                                                                                                                                                                                      |                                                                                                                                                                                                                                                                                                                                                                                                                                                                                                                              |                                                                                                                                                                                                                                                                                              |
| Description                                                                 | Bee health                                                                                                                                                                                                                                                                                                                                                                           |                                                                                                                                                                                                                                                                                                                                                                                                                                                                                                                              |                                                                                                                                                                                                                                                                                              |
| Protection goal(s) and/or influencing factor(s)                             | <input checked="" type="checkbox"/> Protection goal<br><input checked="" type="checkbox"/> Biodiversity: insects<br><input type="checkbox"/> Human Health<br><input type="checkbox"/> Animal Health<br><input type="checkbox"/> Plant Health<br><input type="checkbox"/> Soil function<br><input type="checkbox"/> Water quality<br><input type="checkbox"/> Sustainable Agriculture | <input type="checkbox"/> Influencing factor<br><input type="checkbox"/> Agronomic practice<br><input type="checkbox"/> Plant protection<br><input type="checkbox"/> GMO cultivation<br><input type="checkbox"/> Environmental conditions                                                                                                                                                                                                                                                                                     |                                                                                                                                                                                                                                                                                              |
| Duplication of Farmer's questionnaire                                       | <input checked="" type="checkbox"/> No duplication<br><input type="checkbox"/> Partly duplication<br><input type="checkbox"/> Complete duplication                                                                                                                                                                                                                                   |                                                                                                                                                                                                                                                                                                                                                                                                                                                                                                                              |                                                                                                                                                                                                                                                                                              |
| SPECIFICITY                                                                 |                                                                                                                                                                                                                                                                                                                                                                                      |                                                                                                                                                                                                                                                                                                                                                                                                                                                                                                                              |                                                                                                                                                                                                                                                                                              |
| Geography                                                                   | <input type="checkbox"/> EU -wide<br><input type="checkbox"/> Zone A – North<br><input checked="" type="checkbox"/> Zone B – Centre:<br><input type="checkbox"/> Zone C – South                                                                                                                                                                                                      |                                                                                                                                                                                                                                                                                                                                                                                                                                                                                                                              |                                                                                                                                                                                                                                                                                              |
|                                                                             | <input type="checkbox"/> Denmark,<br><input type="checkbox"/> Estonia,<br><input type="checkbox"/> Latvia,<br><input type="checkbox"/> Lithuania,<br><input type="checkbox"/> Finland,<br><input type="checkbox"/> Sweden                                                                                                                                                            | <input type="checkbox"/> Belgium,<br><input type="checkbox"/> Czech Republic<br><input checked="" type="checkbox"/> Germany,<br><input type="checkbox"/> Ireland,<br><input type="checkbox"/> Luxembourg,<br><input type="checkbox"/> Hungary,<br><input type="checkbox"/> Netherlands,<br><input type="checkbox"/> Austria,<br><input type="checkbox"/> Poland,<br><input type="checkbox"/> Romania,<br><input type="checkbox"/> Slovenia,<br><input type="checkbox"/> Slovakia,<br><input type="checkbox"/> United Kingdom | <input type="checkbox"/> Bulgaria,<br><input type="checkbox"/> Greece,<br><input type="checkbox"/> Spain,<br><input type="checkbox"/> France,<br><input type="checkbox"/> Italy,<br><input type="checkbox"/> Cyprus,<br><input type="checkbox"/> Malta,<br><input type="checkbox"/> Portugal |
|                                                                             | <input type="checkbox"/> Regional (specify)<br><input type="checkbox"/> Local (specify)                                                                                                                                                                                                                                                                                              |                                                                                                                                                                                                                                                                                                                                                                                                                                                                                                                              |                                                                                                                                                                                                                                                                                              |
| Factors                                                                     | <input type="checkbox"/> Multiple species/items (specify)<br><input checked="" type="checkbox"/> Single species/item (specify) Bees                                                                                                                                                                                                                                                  |                                                                                                                                                                                                                                                                                                                                                                                                                                                                                                                              |                                                                                                                                                                                                                                                                                              |
| Crop                                                                        | <input checked="" type="checkbox"/> No specific crop(s)<br><input type="checkbox"/> Several crops (e.g. all cereals)<br><input type="checkbox"/> Single crop                                                                                                                                                                                                                         |                                                                                                                                                                                                                                                                                                                                                                                                                                                                                                                              |                                                                                                                                                                                                                                                                                              |
| Trait /treatment                                                            | <input checked="" type="checkbox"/> No specific traits/treatments<br><input type="checkbox"/> Several traits/treatments                                                                                                                                                                                                                                                              |                                                                                                                                                                                                                                                                                                                                                                                                                                                                                                                              |                                                                                                                                                                                                                                                                                              |

|                       |                                                                                                                                                                                                                                                                        |
|-----------------------|------------------------------------------------------------------------------------------------------------------------------------------------------------------------------------------------------------------------------------------------------------------------|
|                       | <input type="checkbox"/> Single trait/treatment                                                                                                                                                                                                                        |
| GMO                   | <input checked="" type="checkbox"/> No GMO bias<br><input type="checkbox"/> GMO specific                                                                                                                                                                               |
| <b>METHODOLOGY</b>    |                                                                                                                                                                                                                                                                        |
| Observations          | <input checked="" type="checkbox"/> Reported, verifiable methodology<br><input type="checkbox"/> Reported, unverifiable methodology<br><input type="checkbox"/> Unknown, unverifiable methodology                                                                      |
| Frequency             | <input checked="" type="checkbox"/> > 1 time/year<br><input type="checkbox"/> 1 time/year<br><input type="checkbox"/> < 1 time/year                                                                                                                                    |
| Future                | <input type="checkbox"/> For ≥ 5 years<br><input type="checkbox"/> between 1 and 5 years<br><input checked="" type="checkbox"/> no prospect                                                                                                                            |
| Quality of performers | <input checked="" type="checkbox"/> Trained, professionals<br><input type="checkbox"/> Trained, non-professionals – training by documentation, volunteers<br><input type="checkbox"/> Uncertain or not -specified                                                      |
| Quality of data       | <input checked="" type="checkbox"/> Standard recording of raw data<br><input type="checkbox"/> Free recording of raw data<br><input type="checkbox"/> Anecdotic                                                                                                        |
| Analysis              | <input checked="" type="checkbox"/> Reported, verifiable methodology<br><input type="checkbox"/> Reported, unverifiable methodology<br><input type="checkbox"/> Unknown, unverifiable methodology                                                                      |
| Quality of analysis   | <input checked="" type="checkbox"/> Scientifically based<br><input type="checkbox"/> Indicative only<br><input type="checkbox"/> Unknown                                                                                                                               |
| <b>REPORTING</b>      |                                                                                                                                                                                                                                                                        |
| Language              | Reporting language(s): German                                                                                                                                                                                                                                          |
| Availability          | <input type="checkbox"/> Scientific publication<br><input checked="" type="checkbox"/> Official report available on the internet or in other public forum<br><input type="checkbox"/> Official report available from network<br><input type="checkbox"/> Not available |
| Frequency             | <input type="checkbox"/> ≥ 1 time/year –<br><input checked="" type="checkbox"/> < 1 time/year                                                                                                                                                                          |
| Historical reference  | <input type="checkbox"/> over ≥ 5 years<br><input type="checkbox"/> between 1 and 5 years<br><input checked="" type="checkbox"/> no historical analysis                                                                                                                |
| <b>COMMENT(S)</b>     |                                                                                                                                                                                                                                                                        |
| Scientific project    |                                                                                                                                                                                                                                                                        |

## GSEN-09-0056.00.2 DE – BDD

| EuropaBio's coordinated approach to General Surveillance: Existing Networks |                                                                                                                                                                                                                                                                                                                      |                                                                                                                                                                                                                                                                                                                                                                                                                                                                                                                              |                                                                                                                                                                                                                                                                                              |
|-----------------------------------------------------------------------------|----------------------------------------------------------------------------------------------------------------------------------------------------------------------------------------------------------------------------------------------------------------------------------------------------------------------|------------------------------------------------------------------------------------------------------------------------------------------------------------------------------------------------------------------------------------------------------------------------------------------------------------------------------------------------------------------------------------------------------------------------------------------------------------------------------------------------------------------------------|----------------------------------------------------------------------------------------------------------------------------------------------------------------------------------------------------------------------------------------------------------------------------------------------|
| <b>ORGANISATION</b>                                                         |                                                                                                                                                                                                                                                                                                                      |                                                                                                                                                                                                                                                                                                                                                                                                                                                                                                                              |                                                                                                                                                                                                                                                                                              |
| EuropaBio reference                                                         | GS-EN-09-0056                                                                                                                                                                                                                                                                                                        |                                                                                                                                                                                                                                                                                                                                                                                                                                                                                                                              |                                                                                                                                                                                                                                                                                              |
| Official name of the Network                                                | <b>Boden-Dauerbeobachtungsflächen</b>                                                                                                                                                                                                                                                                                |                                                                                                                                                                                                                                                                                                                                                                                                                                                                                                                              |                                                                                                                                                                                                                                                                                              |
| Other names                                                                 | Soil monitoring programs in the different states                                                                                                                                                                                                                                                                     |                                                                                                                                                                                                                                                                                                                                                                                                                                                                                                                              |                                                                                                                                                                                                                                                                                              |
| Type of organisation                                                        | Governmental<br>Founded 1986                                                                                                                                                                                                                                                                                         |                                                                                                                                                                                                                                                                                                                                                                                                                                                                                                                              |                                                                                                                                                                                                                                                                                              |
| Coordinates                                                                 |                                                                                                                                                                                                                                                                                                                      |                                                                                                                                                                                                                                                                                                                                                                                                                                                                                                                              |                                                                                                                                                                                                                                                                                              |
| Website                                                                     | <a href="http://www.umweltbundesamt.de/boden-und-altlasten/boden/bodenschutz/dauerbeobachtung.htm">http://www.umweltbundesamt.de/boden-und-altlasten/boden/bodenschutz/dauerbeobachtung.htm</a>                                                                                                                      |                                                                                                                                                                                                                                                                                                                                                                                                                                                                                                                              |                                                                                                                                                                                                                                                                                              |
| Funding                                                                     | Government                                                                                                                                                                                                                                                                                                           |                                                                                                                                                                                                                                                                                                                                                                                                                                                                                                                              |                                                                                                                                                                                                                                                                                              |
| Conflict of interest                                                        | -                                                                                                                                                                                                                                                                                                                    |                                                                                                                                                                                                                                                                                                                                                                                                                                                                                                                              |                                                                                                                                                                                                                                                                                              |
| Part of other network(s)                                                    |                                                                                                                                                                                                                                                                                                                      |                                                                                                                                                                                                                                                                                                                                                                                                                                                                                                                              |                                                                                                                                                                                                                                                                                              |
| Grouping other network(s)                                                   |                                                                                                                                                                                                                                                                                                                      |                                                                                                                                                                                                                                                                                                                                                                                                                                                                                                                              |                                                                                                                                                                                                                                                                                              |
| <b>MONITORING SUBJECT</b>                                                   |                                                                                                                                                                                                                                                                                                                      |                                                                                                                                                                                                                                                                                                                                                                                                                                                                                                                              |                                                                                                                                                                                                                                                                                              |
| Description                                                                 | monitoring on changes in soil                                                                                                                                                                                                                                                                                        |                                                                                                                                                                                                                                                                                                                                                                                                                                                                                                                              |                                                                                                                                                                                                                                                                                              |
| Protection goal(s) and/or influencing factor(s)                             | <input checked="" type="checkbox"/> Protection goal                                                                                                                                                                                                                                                                  | <input type="checkbox"/> Influencing factor                                                                                                                                                                                                                                                                                                                                                                                                                                                                                  |                                                                                                                                                                                                                                                                                              |
|                                                                             | <input type="checkbox"/> Biodiversity<br><input type="checkbox"/> Human Health<br><input type="checkbox"/> Animal Health<br><input type="checkbox"/> Plant Health<br><input checked="" type="checkbox"/> Soil function<br><input type="checkbox"/> Water quality<br><input type="checkbox"/> Sustainable Agriculture | <input type="checkbox"/> Agronomic practice<br><input type="checkbox"/> Plant protection<br><input type="checkbox"/> GMO cultivation<br><input type="checkbox"/> Environmental conditions                                                                                                                                                                                                                                                                                                                                    |                                                                                                                                                                                                                                                                                              |
| Duplication of Farmer's questionnaire                                       | <input checked="" type="checkbox"/> No duplication<br><input type="checkbox"/> Partly duplication<br><input type="checkbox"/> Complete duplication                                                                                                                                                                   |                                                                                                                                                                                                                                                                                                                                                                                                                                                                                                                              |                                                                                                                                                                                                                                                                                              |
| <b>SPECIFICITY</b>                                                          |                                                                                                                                                                                                                                                                                                                      |                                                                                                                                                                                                                                                                                                                                                                                                                                                                                                                              |                                                                                                                                                                                                                                                                                              |
| Geography                                                                   | <input type="checkbox"/> EU -wide                                                                                                                                                                                                                                                                                    |                                                                                                                                                                                                                                                                                                                                                                                                                                                                                                                              |                                                                                                                                                                                                                                                                                              |
|                                                                             | <input type="checkbox"/> Zone A – North                                                                                                                                                                                                                                                                              | <input checked="" type="checkbox"/> Zone B – Centre:                                                                                                                                                                                                                                                                                                                                                                                                                                                                         | <input type="checkbox"/> Zone C – South                                                                                                                                                                                                                                                      |
|                                                                             | <input type="checkbox"/> Denmark,<br><input type="checkbox"/> Estonia,<br><input type="checkbox"/> Latvia,<br><input type="checkbox"/> Lithuania,<br><input type="checkbox"/> Finland,<br><input type="checkbox"/> Sweden                                                                                            | <input type="checkbox"/> Belgium,<br><input type="checkbox"/> Czech Republic<br><input checked="" type="checkbox"/> Germany,<br><input type="checkbox"/> Ireland,<br><input type="checkbox"/> Luxembourg,<br><input type="checkbox"/> Hungary,<br><input type="checkbox"/> Netherlands,<br><input type="checkbox"/> Austria,<br><input type="checkbox"/> Poland,<br><input type="checkbox"/> Romania,<br><input type="checkbox"/> Slovenia,<br><input type="checkbox"/> Slovakia,<br><input type="checkbox"/> United Kingdom | <input type="checkbox"/> Bulgaria,<br><input type="checkbox"/> Greece,<br><input type="checkbox"/> Spain,<br><input type="checkbox"/> France,<br><input type="checkbox"/> Italy,<br><input type="checkbox"/> Cyprus,<br><input type="checkbox"/> Malta,<br><input type="checkbox"/> Portugal |
|                                                                             | <input type="checkbox"/> Regional (specify)<br><input type="checkbox"/> Local (specify)                                                                                                                                                                                                                              |                                                                                                                                                                                                                                                                                                                                                                                                                                                                                                                              |                                                                                                                                                                                                                                                                                              |
| Factors                                                                     | <input checked="" type="checkbox"/> Multiple species/items (specify): different soil parameters<br><input type="checkbox"/> Single species/item (specify)                                                                                                                                                            |                                                                                                                                                                                                                                                                                                                                                                                                                                                                                                                              |                                                                                                                                                                                                                                                                                              |
| Crop                                                                        | <input checked="" type="checkbox"/> No specific crop(s)<br><input type="checkbox"/> Several crops (e.g. all cereals)<br><input type="checkbox"/> Single crop                                                                                                                                                         |                                                                                                                                                                                                                                                                                                                                                                                                                                                                                                                              |                                                                                                                                                                                                                                                                                              |
| Trait /treatment                                                            | <input checked="" type="checkbox"/> No specific traits/treatments<br><input type="checkbox"/> Several traits/treatments<br><input type="checkbox"/> Single trait/treatment                                                                                                                                           |                                                                                                                                                                                                                                                                                                                                                                                                                                                                                                                              |                                                                                                                                                                                                                                                                                              |
| GMO                                                                         | <input checked="" type="checkbox"/> No GMO bias<br><input type="checkbox"/> GMO specific                                                                                                                                                                                                                             |                                                                                                                                                                                                                                                                                                                                                                                                                                                                                                                              |                                                                                                                                                                                                                                                                                              |
| <b>METHODOLOGY</b>                                                          |                                                                                                                                                                                                                                                                                                                      |                                                                                                                                                                                                                                                                                                                                                                                                                                                                                                                              |                                                                                                                                                                                                                                                                                              |
| Observations                                                                | <input checked="" type="checkbox"/> Reported, verifiable methodology<br><input type="checkbox"/> Reported, unverifiable methodology<br><input type="checkbox"/> Unknown, unverifiable methodology                                                                                                                    |                                                                                                                                                                                                                                                                                                                                                                                                                                                                                                                              |                                                                                                                                                                                                                                                                                              |
| Frequency                                                                   | <input checked="" type="checkbox"/> > 1 time/year                                                                                                                                                                                                                                                                    |                                                                                                                                                                                                                                                                                                                                                                                                                                                                                                                              |                                                                                                                                                                                                                                                                                              |

|                                                                                           |                                                                                                                                                                                                                                                                        |
|-------------------------------------------------------------------------------------------|------------------------------------------------------------------------------------------------------------------------------------------------------------------------------------------------------------------------------------------------------------------------|
|                                                                                           | <input type="checkbox"/> 1 time/year<br><input type="checkbox"/> < 1 time/year                                                                                                                                                                                         |
| Future                                                                                    | <input checked="" type="checkbox"/> For $\geq 5$ years<br><input type="checkbox"/> between 1 and 5 years<br><input checked="" type="checkbox"/> no prospect                                                                                                            |
| Quality of performers                                                                     | <input checked="" type="checkbox"/> Trained, professionals<br><input type="checkbox"/> Trained, non-professionals – training by documentation, volunteers<br><input type="checkbox"/> Uncertain or not -specified                                                      |
| Quality of data                                                                           | <input checked="" type="checkbox"/> Standard recording of raw data<br><input type="checkbox"/> Free recording of raw data<br><input type="checkbox"/> Anecdotic                                                                                                        |
| Analysis                                                                                  | <input checked="" type="checkbox"/> Reported, verifiable methodology<br><input type="checkbox"/> Reported, unverifiable methodology<br><input type="checkbox"/> Unknown, unverifiable methodology                                                                      |
| Quality of analysis                                                                       | <input checked="" type="checkbox"/> Scientifically based<br><input type="checkbox"/> Indicative only<br><input type="checkbox"/> Unknown                                                                                                                               |
| <b>REPORTING</b>                                                                          |                                                                                                                                                                                                                                                                        |
| Language                                                                                  | Reporting language(s): German                                                                                                                                                                                                                                          |
| Availability                                                                              | <input type="checkbox"/> Scientific publication<br><input checked="" type="checkbox"/> Official report available on the internet or in other public forum<br><input type="checkbox"/> Official report available from network<br><input type="checkbox"/> Not available |
| Frequency                                                                                 | <input checked="" type="checkbox"/> $\geq 1$ time/year –<br><input type="checkbox"/> < 1 time/year                                                                                                                                                                     |
| Historical reference                                                                      | <input checked="" type="checkbox"/> over $\geq 5$ years<br><input type="checkbox"/> between 1 and 5 years<br><input type="checkbox"/> no historical analysis                                                                                                           |
| <b>COMMENT(S)</b>                                                                         |                                                                                                                                                                                                                                                                        |
| Official reference for soil quality, most parameters distant from potential GM influence. |                                                                                                                                                                                                                                                                        |

## GSEN-09-0057.00.3 DE – DJV

| EuropaBio's coordinated approach to General Surveillance: Existing Networks |                                                                                                                                                                                                                                                                                                                                                |                                                                                                                                                                                                                                                                                                                                                                                                                                                                                                                              |                                                                                                                                                                                                                                                                                              |
|-----------------------------------------------------------------------------|------------------------------------------------------------------------------------------------------------------------------------------------------------------------------------------------------------------------------------------------------------------------------------------------------------------------------------------------|------------------------------------------------------------------------------------------------------------------------------------------------------------------------------------------------------------------------------------------------------------------------------------------------------------------------------------------------------------------------------------------------------------------------------------------------------------------------------------------------------------------------------|----------------------------------------------------------------------------------------------------------------------------------------------------------------------------------------------------------------------------------------------------------------------------------------------|
| <b>ORGANISATION</b>                                                         |                                                                                                                                                                                                                                                                                                                                                |                                                                                                                                                                                                                                                                                                                                                                                                                                                                                                                              |                                                                                                                                                                                                                                                                                              |
| EuropaBio reference                                                         | GS-EN-09-0057                                                                                                                                                                                                                                                                                                                                  |                                                                                                                                                                                                                                                                                                                                                                                                                                                                                                                              |                                                                                                                                                                                                                                                                                              |
| Official name of the Network                                                | <b>Deutsche Jagdschutz-Verband</b>                                                                                                                                                                                                                                                                                                             |                                                                                                                                                                                                                                                                                                                                                                                                                                                                                                                              |                                                                                                                                                                                                                                                                                              |
| Other names                                                                 | German Hunting Association (DJV)                                                                                                                                                                                                                                                                                                               |                                                                                                                                                                                                                                                                                                                                                                                                                                                                                                                              |                                                                                                                                                                                                                                                                                              |
| Type of organisation                                                        | Nature conservation<br>Founded 1986                                                                                                                                                                                                                                                                                                            |                                                                                                                                                                                                                                                                                                                                                                                                                                                                                                                              |                                                                                                                                                                                                                                                                                              |
| Coordinates                                                                 | Johannes-Henry-Str. 26<br>53113 Bonn<br><br>Fax: 0228/949 0630<br>Email: <a href="mailto:djv[at]jagdschutzverband.de">djv[at]jagdschutzverband.de</a>                                                                                                                                                                                          |                                                                                                                                                                                                                                                                                                                                                                                                                                                                                                                              |                                                                                                                                                                                                                                                                                              |
| Website                                                                     | <a href="http://www.jagdnetz.de/home">http://www.jagdnetz.de/home</a><br><a href="http://www.jagd-online.de/home/">http://www.jagd-online.de/home/</a>                                                                                                                                                                                         |                                                                                                                                                                                                                                                                                                                                                                                                                                                                                                                              |                                                                                                                                                                                                                                                                                              |
| Funding                                                                     | Member organisations                                                                                                                                                                                                                                                                                                                           |                                                                                                                                                                                                                                                                                                                                                                                                                                                                                                                              |                                                                                                                                                                                                                                                                                              |
| Conflict of interest                                                        | -                                                                                                                                                                                                                                                                                                                                              |                                                                                                                                                                                                                                                                                                                                                                                                                                                                                                                              |                                                                                                                                                                                                                                                                                              |
| Part of other network(s)                                                    |                                                                                                                                                                                                                                                                                                                                                |                                                                                                                                                                                                                                                                                                                                                                                                                                                                                                                              |                                                                                                                                                                                                                                                                                              |
| Grouping other network(s)                                                   | 16 German „Land“ hunting associations                                                                                                                                                                                                                                                                                                          |                                                                                                                                                                                                                                                                                                                                                                                                                                                                                                                              |                                                                                                                                                                                                                                                                                              |
| <b>MONITORING SUBJECT</b>                                                   |                                                                                                                                                                                                                                                                                                                                                |                                                                                                                                                                                                                                                                                                                                                                                                                                                                                                                              |                                                                                                                                                                                                                                                                                              |
| Description                                                                 | Monitoring of game population and dynamics                                                                                                                                                                                                                                                                                                     |                                                                                                                                                                                                                                                                                                                                                                                                                                                                                                                              |                                                                                                                                                                                                                                                                                              |
| Protection goal(s) and/or influencing factor(s)                             | <input checked="" type="checkbox"/> Protection goal                                                                                                                                                                                                                                                                                            | <input type="checkbox"/> Influencing factor                                                                                                                                                                                                                                                                                                                                                                                                                                                                                  |                                                                                                                                                                                                                                                                                              |
|                                                                             | <input checked="" type="checkbox"/> Biodiversity: mammals and birds (game)<br><input type="checkbox"/> Human Health<br><input type="checkbox"/> Animal Health<br><input type="checkbox"/> Plant Health<br><input type="checkbox"/> Soil function<br><input type="checkbox"/> Water quality<br><input type="checkbox"/> Sustainable Agriculture | <input type="checkbox"/> Agronomic practice<br><input type="checkbox"/> Plant protection<br><input type="checkbox"/> GMO cultivation<br><input type="checkbox"/> Environmental conditions                                                                                                                                                                                                                                                                                                                                    |                                                                                                                                                                                                                                                                                              |
| Duplication of Farmer's questionnaire                                       | <input checked="" type="checkbox"/> No duplication<br><input type="checkbox"/> Partly duplication<br><input type="checkbox"/> Complete duplication                                                                                                                                                                                             |                                                                                                                                                                                                                                                                                                                                                                                                                                                                                                                              |                                                                                                                                                                                                                                                                                              |
| <b>SPECIFICITY</b>                                                          |                                                                                                                                                                                                                                                                                                                                                |                                                                                                                                                                                                                                                                                                                                                                                                                                                                                                                              |                                                                                                                                                                                                                                                                                              |
| Geography                                                                   | <input type="checkbox"/> EU -wide                                                                                                                                                                                                                                                                                                              |                                                                                                                                                                                                                                                                                                                                                                                                                                                                                                                              |                                                                                                                                                                                                                                                                                              |
|                                                                             | <input type="checkbox"/> Zone A – North                                                                                                                                                                                                                                                                                                        | <input checked="" type="checkbox"/> Zone B – Centre:                                                                                                                                                                                                                                                                                                                                                                                                                                                                         | <input type="checkbox"/> Zone C – South                                                                                                                                                                                                                                                      |
|                                                                             | <input type="checkbox"/> Denmark,<br><input type="checkbox"/> Estonia,<br><input type="checkbox"/> Latvia,<br><input type="checkbox"/> Lithuania,<br><input type="checkbox"/> Finland,<br><input type="checkbox"/> Sweden                                                                                                                      | <input type="checkbox"/> Belgium,<br><input type="checkbox"/> Czech Republic<br><input checked="" type="checkbox"/> Germany,<br><input type="checkbox"/> Ireland,<br><input type="checkbox"/> Luxembourg,<br><input type="checkbox"/> Hungary,<br><input type="checkbox"/> Netherlands,<br><input type="checkbox"/> Austria,<br><input type="checkbox"/> Poland,<br><input type="checkbox"/> Romania,<br><input type="checkbox"/> Slovenia,<br><input type="checkbox"/> Slovakia,<br><input type="checkbox"/> United Kingdom | <input type="checkbox"/> Bulgaria,<br><input type="checkbox"/> Greece,<br><input type="checkbox"/> Spain,<br><input type="checkbox"/> France,<br><input type="checkbox"/> Italy,<br><input type="checkbox"/> Cyprus,<br><input type="checkbox"/> Malta,<br><input type="checkbox"/> Portugal |
|                                                                             | <input type="checkbox"/> Regional (specify)<br><input type="checkbox"/> Local (specify)                                                                                                                                                                                                                                                        |                                                                                                                                                                                                                                                                                                                                                                                                                                                                                                                              |                                                                                                                                                                                                                                                                                              |
| Factors                                                                     | <input checked="" type="checkbox"/> Multiple species/items (specify): game (hare, fox, badger, crows, partridge)<br><input type="checkbox"/> Single species/item (specify)                                                                                                                                                                     |                                                                                                                                                                                                                                                                                                                                                                                                                                                                                                                              |                                                                                                                                                                                                                                                                                              |
| Crop                                                                        | <input checked="" type="checkbox"/> No specific crop(s)<br><input type="checkbox"/> Several crops (e.g. all cereals)<br><input type="checkbox"/> Single crop                                                                                                                                                                                   |                                                                                                                                                                                                                                                                                                                                                                                                                                                                                                                              |                                                                                                                                                                                                                                                                                              |
| Trait /treatment                                                            | <input checked="" type="checkbox"/> No specific traits/treatments<br><input type="checkbox"/> Several traits/treatments<br><input type="checkbox"/> Single trait/treatment                                                                                                                                                                     |                                                                                                                                                                                                                                                                                                                                                                                                                                                                                                                              |                                                                                                                                                                                                                                                                                              |
| GMO                                                                         | <input checked="" type="checkbox"/> No GMO bias<br><input type="checkbox"/> GMO specific                                                                                                                                                                                                                                                       |                                                                                                                                                                                                                                                                                                                                                                                                                                                                                                                              |                                                                                                                                                                                                                                                                                              |
| <b>METHODOLOGY</b>                                                          |                                                                                                                                                                                                                                                                                                                                                |                                                                                                                                                                                                                                                                                                                                                                                                                                                                                                                              |                                                                                                                                                                                                                                                                                              |

|                                                                       |                                                                                                                                                                                                                                                                                   |
|-----------------------------------------------------------------------|-----------------------------------------------------------------------------------------------------------------------------------------------------------------------------------------------------------------------------------------------------------------------------------|
| Observations                                                          | <input checked="" type="checkbox"/> Reported, verifiable methodology<br><input type="checkbox"/> Reported, unverifiable methodology<br><input type="checkbox"/> Unknown, unverifiable methodology                                                                                 |
| Frequency                                                             | <input checked="" type="checkbox"/> > 1 time/year<br><input type="checkbox"/> 1 time/year<br><input type="checkbox"/> < 1 time/year                                                                                                                                               |
| Future                                                                | <input checked="" type="checkbox"/> For $\geq 5$ years<br><input type="checkbox"/> between 1 and 5 years<br><input type="checkbox"/> no prospect                                                                                                                                  |
| Quality of performers                                                 | <input checked="" type="checkbox"/> Trained, professionals<br><input type="checkbox"/> Trained, non-professionals – training by documentation, volunteers<br><input type="checkbox"/> Uncertain or not -specified                                                                 |
| Quality of data                                                       | <input checked="" type="checkbox"/> Standard recording of raw data<br><input type="checkbox"/> Free recording of raw data<br><input type="checkbox"/> Anecdotic                                                                                                                   |
| Analysis                                                              | <input checked="" type="checkbox"/> Reported, verifiable methodology<br><input type="checkbox"/> Reported, unverifiable methodology<br><input type="checkbox"/> Unknown, unverifiable methodology                                                                                 |
| Quality of analysis                                                   | <input checked="" type="checkbox"/> Scientifically based<br><input type="checkbox"/> Indicative only<br><input type="checkbox"/> Unknown                                                                                                                                          |
| <b>REPORTING</b>                                                      |                                                                                                                                                                                                                                                                                   |
| Language                                                              | Reporting language(s): German                                                                                                                                                                                                                                                     |
| Availability                                                          | <input checked="" type="checkbox"/> Scientific publication<br><input checked="" type="checkbox"/> Official report available on the internet or in other public forum<br><input type="checkbox"/> Official report available from network<br><input type="checkbox"/> Not available |
| Frequency                                                             | <input checked="" type="checkbox"/> $\geq 1$ time/year<br><input type="checkbox"/> < 1 time/year                                                                                                                                                                                  |
| Historical reference                                                  | <input checked="" type="checkbox"/> over $\geq 5$ years<br><input type="checkbox"/> between 1 and 5 years<br><input type="checkbox"/> no historical analysis                                                                                                                      |
| <b>COMMENT(S)</b>                                                     |                                                                                                                                                                                                                                                                                   |
| Game species monitoring network collaborating on scientific projects. |                                                                                                                                                                                                                                                                                   |



## GSEN-09-0058.00.2 DE – BVL GMO Register

| EuropaBio's coordinated approach to General Surveillance: Existing Networks |                                                                                                                                                                                                                                                                                                                                                           |                                                                                                                                                                                                                                                                                                                                                                                                                                                                                                                                                                                      |                                                                                                                                                                                                                                                                                                                                         |
|-----------------------------------------------------------------------------|-----------------------------------------------------------------------------------------------------------------------------------------------------------------------------------------------------------------------------------------------------------------------------------------------------------------------------------------------------------|--------------------------------------------------------------------------------------------------------------------------------------------------------------------------------------------------------------------------------------------------------------------------------------------------------------------------------------------------------------------------------------------------------------------------------------------------------------------------------------------------------------------------------------------------------------------------------------|-----------------------------------------------------------------------------------------------------------------------------------------------------------------------------------------------------------------------------------------------------------------------------------------------------------------------------------------|
| ORGANISATION                                                                |                                                                                                                                                                                                                                                                                                                                                           |                                                                                                                                                                                                                                                                                                                                                                                                                                                                                                                                                                                      |                                                                                                                                                                                                                                                                                                                                         |
| EuropaBio reference                                                         | GS-EN-09-0058                                                                                                                                                                                                                                                                                                                                             |                                                                                                                                                                                                                                                                                                                                                                                                                                                                                                                                                                                      |                                                                                                                                                                                                                                                                                                                                         |
| Official name of the Network                                                | <b>Bundesanstalt für Verbraucherschutz und Lebensmittelsicherheit - Standortregister</b>                                                                                                                                                                                                                                                                  |                                                                                                                                                                                                                                                                                                                                                                                                                                                                                                                                                                                      |                                                                                                                                                                                                                                                                                                                                         |
| Other names                                                                 | Federal Office of Consumer Protection and Food Safety (BVL): GMO register                                                                                                                                                                                                                                                                                 |                                                                                                                                                                                                                                                                                                                                                                                                                                                                                                                                                                                      |                                                                                                                                                                                                                                                                                                                                         |
| Type of organisation                                                        | Government<br>Founded 2005                                                                                                                                                                                                                                                                                                                                |                                                                                                                                                                                                                                                                                                                                                                                                                                                                                                                                                                                      |                                                                                                                                                                                                                                                                                                                                         |
| Coordinates                                                                 | Bundesamt für Verbraucherschutz und Lebensmittelsicherheit,<br>Referat 404,<br>Mauerstraße 39-42,<br>Berlin, 10117                                                                                                                                                                                                                                        |                                                                                                                                                                                                                                                                                                                                                                                                                                                                                                                                                                                      |                                                                                                                                                                                                                                                                                                                                         |
| Website                                                                     | <a href="http://apps2.bvl.bund.de/stareg_web/showflaechen.do">http://apps2.bvl.bund.de/stareg_web/showflaechen.do</a>                                                                                                                                                                                                                                     |                                                                                                                                                                                                                                                                                                                                                                                                                                                                                                                                                                                      |                                                                                                                                                                                                                                                                                                                                         |
| Funding                                                                     | Government                                                                                                                                                                                                                                                                                                                                                |                                                                                                                                                                                                                                                                                                                                                                                                                                                                                                                                                                                      |                                                                                                                                                                                                                                                                                                                                         |
| Conflict of interest                                                        | -                                                                                                                                                                                                                                                                                                                                                         |                                                                                                                                                                                                                                                                                                                                                                                                                                                                                                                                                                                      |                                                                                                                                                                                                                                                                                                                                         |
| Part of other network(s)                                                    |                                                                                                                                                                                                                                                                                                                                                           |                                                                                                                                                                                                                                                                                                                                                                                                                                                                                                                                                                                      |                                                                                                                                                                                                                                                                                                                                         |
| Grouping other network(s)                                                   |                                                                                                                                                                                                                                                                                                                                                           |                                                                                                                                                                                                                                                                                                                                                                                                                                                                                                                                                                                      |                                                                                                                                                                                                                                                                                                                                         |
| MONITORING SUBJECT                                                          |                                                                                                                                                                                                                                                                                                                                                           |                                                                                                                                                                                                                                                                                                                                                                                                                                                                                                                                                                                      |                                                                                                                                                                                                                                                                                                                                         |
| Description                                                                 | GMO register (trials & commercial planting)                                                                                                                                                                                                                                                                                                               |                                                                                                                                                                                                                                                                                                                                                                                                                                                                                                                                                                                      |                                                                                                                                                                                                                                                                                                                                         |
| Protection goal(s) and/or influencing factor(s)                             | <input type="checkbox"/> Protection goal<br><br><input type="checkbox"/> Biodiversity<br><input type="checkbox"/> Human Health<br><input type="checkbox"/> Animal Health<br><input type="checkbox"/> Plant Health<br><input type="checkbox"/> Soil function<br><input type="checkbox"/> Water quality<br><input type="checkbox"/> Sustainable Agriculture | <input checked="" type="checkbox"/> Influencing factor<br><br><input type="checkbox"/> Agronomic practice<br><input type="checkbox"/> Plant protection<br><input checked="" type="checkbox"/> GMO cultivation<br><input type="checkbox"/> Environmental conditions                                                                                                                                                                                                                                                                                                                   |                                                                                                                                                                                                                                                                                                                                         |
| Duplication of Farmer's questionnaire                                       | <input type="checkbox"/> No duplication<br><input checked="" type="checkbox"/> Partly duplication<br><input type="checkbox"/> Complete duplication                                                                                                                                                                                                        |                                                                                                                                                                                                                                                                                                                                                                                                                                                                                                                                                                                      |                                                                                                                                                                                                                                                                                                                                         |
| SPECIFICITY                                                                 |                                                                                                                                                                                                                                                                                                                                                           |                                                                                                                                                                                                                                                                                                                                                                                                                                                                                                                                                                                      |                                                                                                                                                                                                                                                                                                                                         |
| Geography                                                                   | <input type="checkbox"/> EU -wide<br><br><input type="checkbox"/> Zone A – North<br><input type="checkbox"/> Denmark,<br><input type="checkbox"/> Estonia,<br><input type="checkbox"/> Latvia,<br><input type="checkbox"/> Lithuania,<br><input type="checkbox"/> Finland,<br><input type="checkbox"/> Sweden                                             | <input checked="" type="checkbox"/> Zone B – Centre:<br><input type="checkbox"/> Belgium,<br><input type="checkbox"/> Czech Republic<br><input checked="" type="checkbox"/> Germany,<br><input type="checkbox"/> Ireland,<br><input type="checkbox"/> Luxembourg,<br><input type="checkbox"/> Hungary,<br><input type="checkbox"/> Netherlands,<br><input type="checkbox"/> Austria,<br><input type="checkbox"/> Poland,<br><input type="checkbox"/> Romania,<br><input type="checkbox"/> Slovenia,<br><input type="checkbox"/> Slovakia,<br><input type="checkbox"/> United Kingdom | <input type="checkbox"/> Zone C – South<br><input type="checkbox"/> Bulgaria,<br><input type="checkbox"/> Greece,<br><input type="checkbox"/> Spain,<br><input type="checkbox"/> France,<br><input type="checkbox"/> Italy,<br><input type="checkbox"/> Cyprus,<br><input type="checkbox"/> Malta,<br><input type="checkbox"/> Portugal |
|                                                                             | <input type="checkbox"/> Regional (specify)<br><input type="checkbox"/> Local (specify)                                                                                                                                                                                                                                                                   |                                                                                                                                                                                                                                                                                                                                                                                                                                                                                                                                                                                      |                                                                                                                                                                                                                                                                                                                                         |
| Factors                                                                     | <input checked="" type="checkbox"/> Multiple species/items (specify): GMO cultivation<br><input type="checkbox"/> Single species/item (specify)                                                                                                                                                                                                           |                                                                                                                                                                                                                                                                                                                                                                                                                                                                                                                                                                                      |                                                                                                                                                                                                                                                                                                                                         |
| Crop                                                                        | <input checked="" type="checkbox"/> No specific crop(s)<br><input type="checkbox"/> Several crops (e.g. all cereals)<br><input type="checkbox"/> Single crop                                                                                                                                                                                              |                                                                                                                                                                                                                                                                                                                                                                                                                                                                                                                                                                                      |                                                                                                                                                                                                                                                                                                                                         |
| Trait /treatment                                                            | <input checked="" type="checkbox"/> No specific traits/treatments<br><input type="checkbox"/> Several traits/treatments<br><input type="checkbox"/> Single trait/treatment                                                                                                                                                                                |                                                                                                                                                                                                                                                                                                                                                                                                                                                                                                                                                                                      |                                                                                                                                                                                                                                                                                                                                         |
| GMO                                                                         | <input checked="" type="checkbox"/> No GMO bias<br><input type="checkbox"/> GMO specific                                                                                                                                                                                                                                                                  |                                                                                                                                                                                                                                                                                                                                                                                                                                                                                                                                                                                      |                                                                                                                                                                                                                                                                                                                                         |
| METHODOLOGY                                                                 |                                                                                                                                                                                                                                                                                                                                                           |                                                                                                                                                                                                                                                                                                                                                                                                                                                                                                                                                                                      |                                                                                                                                                                                                                                                                                                                                         |
| Observations                                                                | <input checked="" type="checkbox"/> Reported, verifiable methodology<br><input type="checkbox"/> Reported, unverifiable methodology                                                                                                                                                                                                                       |                                                                                                                                                                                                                                                                                                                                                                                                                                                                                                                                                                                      |                                                                                                                                                                                                                                                                                                                                         |

|                                                    |                                                                                                                                                                                                                                                                        |
|----------------------------------------------------|------------------------------------------------------------------------------------------------------------------------------------------------------------------------------------------------------------------------------------------------------------------------|
|                                                    | <input type="checkbox"/> Unknown, unverifiable methodology                                                                                                                                                                                                             |
| Frequency                                          | <input checked="" type="checkbox"/> > 1 time/year<br><input type="checkbox"/> 1 time/year<br><input type="checkbox"/> < 1 time/year                                                                                                                                    |
| Future                                             | <input checked="" type="checkbox"/> For $\geq 5$ years<br><input type="checkbox"/> between 1 and 5 years<br><input type="checkbox"/> no prospect                                                                                                                       |
| Quality of performers                              | <input checked="" type="checkbox"/> Trained, professionals<br><input type="checkbox"/> Trained, non-professionals – training by documentation, volunteers<br><input type="checkbox"/> Uncertain or not -specified                                                      |
| Quality of data                                    | <input checked="" type="checkbox"/> Standard recording of raw data<br><input type="checkbox"/> Free recording of raw data<br><input type="checkbox"/> Anecdotic                                                                                                        |
| Analysis                                           | <input checked="" type="checkbox"/> Reported, verifiable methodology<br><input type="checkbox"/> Reported, unverifiable methodology<br><input type="checkbox"/> Unknown, unverifiable methodology                                                                      |
| Quality of analysis                                | <input checked="" type="checkbox"/> Scientifically based<br><input type="checkbox"/> Indicative only<br><input type="checkbox"/> Unknown                                                                                                                               |
| <b>REPORTING</b>                                   |                                                                                                                                                                                                                                                                        |
| Language                                           | Reporting language(s): German/English                                                                                                                                                                                                                                  |
| Availability                                       | <input type="checkbox"/> Scientific publication<br><input checked="" type="checkbox"/> Official report available on the internet or in other public forum<br><input type="checkbox"/> Official report available from network<br><input type="checkbox"/> Not available |
| Frequency                                          | <input checked="" type="checkbox"/> $\geq 1$ time/year<br><input type="checkbox"/> < 1 time/year                                                                                                                                                                       |
| Historical reference                               | <input checked="" type="checkbox"/> over $\geq 5$ years<br><input type="checkbox"/> between 1 and 5 years<br><input type="checkbox"/> no historical analysis                                                                                                           |
| <b>COMMENT(S)</b>                                  |                                                                                                                                                                                                                                                                        |
| Government implementation of GMO location register |                                                                                                                                                                                                                                                                        |

## GSEN-09-0059.00.2 DE – UBA KIS

| EuropaBio's coordinated approach to General Surveillance: Existing Networks |                                                                                                                                                                                                                                                                                                                                                                                                                                                                                                                                                                                      |                                                                                                                                                                                                                                                                                                                                         |  |
|-----------------------------------------------------------------------------|--------------------------------------------------------------------------------------------------------------------------------------------------------------------------------------------------------------------------------------------------------------------------------------------------------------------------------------------------------------------------------------------------------------------------------------------------------------------------------------------------------------------------------------------------------------------------------------|-----------------------------------------------------------------------------------------------------------------------------------------------------------------------------------------------------------------------------------------------------------------------------------------------------------------------------------------|--|
| ORGANISATION                                                                |                                                                                                                                                                                                                                                                                                                                                                                                                                                                                                                                                                                      |                                                                                                                                                                                                                                                                                                                                         |  |
| EuropaBio reference                                                         | GS-EN-09-0059                                                                                                                                                                                                                                                                                                                                                                                                                                                                                                                                                                        |                                                                                                                                                                                                                                                                                                                                         |  |
| Official name of the Network                                                | <b>Umweltbundesamt (UBA)</b><br><b>Umwelt-Kernindikatorensystem des Umweltbundesamtes (KIS)</b>                                                                                                                                                                                                                                                                                                                                                                                                                                                                                      |                                                                                                                                                                                                                                                                                                                                         |  |
| Other names                                                                 | Federal Environment Agency: core environmental indicators                                                                                                                                                                                                                                                                                                                                                                                                                                                                                                                            |                                                                                                                                                                                                                                                                                                                                         |  |
| Type of organisation                                                        | Governmental<br>Founded (unknown)                                                                                                                                                                                                                                                                                                                                                                                                                                                                                                                                                    |                                                                                                                                                                                                                                                                                                                                         |  |
| Coordinates                                                                 | Wörlitzer Platz 1<br>06844 Dessau-Roßlau<br><br>Fax: +49-340-2103-2285<br>Email: <a href="mailto:buergerservice[at]uba.de">buergerservice[at]uba.de</a>                                                                                                                                                                                                                                                                                                                                                                                                                              |                                                                                                                                                                                                                                                                                                                                         |  |
| Website                                                                     | <a href="http://www.umweltbundesamt-umwelt-deutschland.de/umweltdaten/public/theme.do?nodeId=2702">http://www.umweltbundesamt-umwelt-deutschland.de/umweltdaten/public/theme.do?nodeId=2702</a>                                                                                                                                                                                                                                                                                                                                                                                      |                                                                                                                                                                                                                                                                                                                                         |  |
| Funding                                                                     | Government                                                                                                                                                                                                                                                                                                                                                                                                                                                                                                                                                                           |                                                                                                                                                                                                                                                                                                                                         |  |
| Conflict of interest                                                        | -                                                                                                                                                                                                                                                                                                                                                                                                                                                                                                                                                                                    |                                                                                                                                                                                                                                                                                                                                         |  |
| Part of other network(s)                                                    |                                                                                                                                                                                                                                                                                                                                                                                                                                                                                                                                                                                      |                                                                                                                                                                                                                                                                                                                                         |  |
| Grouping other network(s)                                                   |                                                                                                                                                                                                                                                                                                                                                                                                                                                                                                                                                                                      |                                                                                                                                                                                                                                                                                                                                         |  |
| MONITORING SUBJECT                                                          |                                                                                                                                                                                                                                                                                                                                                                                                                                                                                                                                                                                      |                                                                                                                                                                                                                                                                                                                                         |  |
| Description                                                                 | Monitoring of 16 themes including biodiversity of species, biotypes and landscapes; nature reserves and parks, land-use (ecological farming, impact of farming, GMOs)                                                                                                                                                                                                                                                                                                                                                                                                                |                                                                                                                                                                                                                                                                                                                                         |  |
| Protection goal(s) and/or influencing factor(s)                             | <input checked="" type="checkbox"/> Protection goal<br><br><input type="checkbox"/> Biodiversity<br><input type="checkbox"/> Human Health<br><input type="checkbox"/> Animal Health<br><input type="checkbox"/> Plant Health<br><input type="checkbox"/> Soil function<br><input type="checkbox"/> Water quality<br><input checked="" type="checkbox"/> Sustainable Agriculture                                                                                                                                                                                                      | <input checked="" type="checkbox"/> Influencing factor<br><br><input checked="" type="checkbox"/> Agronomic practice<br><input type="checkbox"/> Plant protection<br><input type="checkbox"/> GMO cultivation<br><input type="checkbox"/> Environmental conditions                                                                      |  |
| Duplication of Farmer's questionnaire                                       | <input type="checkbox"/> No duplication<br><input checked="" type="checkbox"/> Partly duplication<br><input type="checkbox"/> Complete duplication                                                                                                                                                                                                                                                                                                                                                                                                                                   |                                                                                                                                                                                                                                                                                                                                         |  |
| SPECIFICITY                                                                 |                                                                                                                                                                                                                                                                                                                                                                                                                                                                                                                                                                                      |                                                                                                                                                                                                                                                                                                                                         |  |
| Geography                                                                   | <input type="checkbox"/> EU -wide<br><br><input type="checkbox"/> Zone A – North<br><input type="checkbox"/> Denmark,<br><input type="checkbox"/> Estonia,<br><input type="checkbox"/> Latvia,<br><input type="checkbox"/> Lithuania,<br><input type="checkbox"/> Finland,<br><input type="checkbox"/> Sweden                                                                                                                                                                                                                                                                        |                                                                                                                                                                                                                                                                                                                                         |  |
|                                                                             | <input checked="" type="checkbox"/> Zone B – Centre:<br><input type="checkbox"/> Belgium,<br><input type="checkbox"/> Czech Republic<br><input checked="" type="checkbox"/> Germany,<br><input type="checkbox"/> Ireland,<br><input type="checkbox"/> Luxembourg,<br><input type="checkbox"/> Hungary,<br><input type="checkbox"/> Netherlands,<br><input type="checkbox"/> Austria,<br><input type="checkbox"/> Poland,<br><input type="checkbox"/> Romania,<br><input type="checkbox"/> Slovenia,<br><input type="checkbox"/> Slovakia,<br><input type="checkbox"/> United Kingdom | <input type="checkbox"/> Zone C – South<br><input type="checkbox"/> Bulgaria,<br><input type="checkbox"/> Greece,<br><input type="checkbox"/> Spain,<br><input type="checkbox"/> France,<br><input type="checkbox"/> Italy,<br><input type="checkbox"/> Cyprus,<br><input type="checkbox"/> Malta,<br><input type="checkbox"/> Portugal |  |
|                                                                             | <input type="checkbox"/> Regional (specify)<br><input type="checkbox"/> Local (specify)                                                                                                                                                                                                                                                                                                                                                                                                                                                                                              |                                                                                                                                                                                                                                                                                                                                         |  |
| Factors                                                                     | <input checked="" type="checkbox"/> Multiple species/items (specify): 16 themes, not all relevant<br><input type="checkbox"/> Single species/item (specify)                                                                                                                                                                                                                                                                                                                                                                                                                          |                                                                                                                                                                                                                                                                                                                                         |  |
| Crop                                                                        | <input checked="" type="checkbox"/> No specific crop(s)<br><input type="checkbox"/> Several crops (e.g. all cereals)<br><input type="checkbox"/> Single crop                                                                                                                                                                                                                                                                                                                                                                                                                         |                                                                                                                                                                                                                                                                                                                                         |  |
| Trait /treatment                                                            | <input checked="" type="checkbox"/> No specific traits/treatments<br><input type="checkbox"/> Several traits/treatments<br><input type="checkbox"/> Single trait/treatment                                                                                                                                                                                                                                                                                                                                                                                                           |                                                                                                                                                                                                                                                                                                                                         |  |
| GMO                                                                         | <input checked="" type="checkbox"/> No GMO bias<br><input checked="" type="checkbox"/> GMO specific (1 theme)                                                                                                                                                                                                                                                                                                                                                                                                                                                                        |                                                                                                                                                                                                                                                                                                                                         |  |

| <b>METHODOLOGY</b>                                                                        |                                                                                                                                                                                                                                                                        |
|-------------------------------------------------------------------------------------------|------------------------------------------------------------------------------------------------------------------------------------------------------------------------------------------------------------------------------------------------------------------------|
| Observations                                                                              | <input checked="" type="checkbox"/> Reported, verifiable methodology<br><input type="checkbox"/> Reported, unverifiable methodology<br><input type="checkbox"/> Unknown, unverifiable methodology                                                                      |
| Frequency                                                                                 | <input checked="" type="checkbox"/> > 1 time/year<br><input type="checkbox"/> 1 time/year<br><input type="checkbox"/> < 1 time/year                                                                                                                                    |
| Future                                                                                    | <input checked="" type="checkbox"/> For ≥ 5 years<br><input type="checkbox"/> between 1 and 5 years<br><input type="checkbox"/> no prospect                                                                                                                            |
| Quality of performers                                                                     | <input checked="" type="checkbox"/> Trained, professionals<br><input type="checkbox"/> Trained, non-professionals – training by documentation, volunteers<br><input type="checkbox"/> Uncertain or not -specified                                                      |
| Quality of data                                                                           | <input checked="" type="checkbox"/> Standard recording of raw data<br><input type="checkbox"/> Free recording of raw data<br><input type="checkbox"/> Anecdotic                                                                                                        |
| Analysis                                                                                  | <input checked="" type="checkbox"/> Reported, verifiable methodology<br><input type="checkbox"/> Reported, unverifiable methodology<br><input type="checkbox"/> Unknown, unverifiable methodology                                                                      |
| Quality of analysis                                                                       | <input checked="" type="checkbox"/> Scientifically based<br><input type="checkbox"/> Indicative only<br><input type="checkbox"/> Unknown                                                                                                                               |
| <b>REPORTING</b>                                                                          |                                                                                                                                                                                                                                                                        |
| Language                                                                                  | Reporting language(s): German                                                                                                                                                                                                                                          |
| Availability                                                                              | <input type="checkbox"/> Scientific publication<br><input checked="" type="checkbox"/> Official report available on the internet or in other public forum<br><input type="checkbox"/> Official report available from network<br><input type="checkbox"/> Not available |
| Frequency                                                                                 | <input type="checkbox"/> ≥ 1 time/year<br><input type="checkbox"/> < 1 time/year                                                                                                                                                                                       |
| Historical reference                                                                      | <input checked="" type="checkbox"/> over ≥ 5 years<br><input type="checkbox"/> between 1 and 5 years<br><input type="checkbox"/> no historical analysis                                                                                                                |
| <b>COMMENT(S)</b>                                                                         |                                                                                                                                                                                                                                                                        |
| Government implementation of environmental key indicators in line with political priority |                                                                                                                                                                                                                                                                        |

## GSEN-09-0060.00.2 DE – ISIP

| EuropaBio's coordinated approach to General Surveillance: Existing Networks |                                                                                                                                                                                                                                                                                                                                                                                                                                                                                                                                                                                      |                                                                                                                                                                                                                                                                                                                                         |  |
|-----------------------------------------------------------------------------|--------------------------------------------------------------------------------------------------------------------------------------------------------------------------------------------------------------------------------------------------------------------------------------------------------------------------------------------------------------------------------------------------------------------------------------------------------------------------------------------------------------------------------------------------------------------------------------|-----------------------------------------------------------------------------------------------------------------------------------------------------------------------------------------------------------------------------------------------------------------------------------------------------------------------------------------|--|
| <b>ORGANISATION</b>                                                         |                                                                                                                                                                                                                                                                                                                                                                                                                                                                                                                                                                                      |                                                                                                                                                                                                                                                                                                                                         |  |
| EuropaBio reference                                                         | GS-EN-09-0060                                                                                                                                                                                                                                                                                                                                                                                                                                                                                                                                                                        |                                                                                                                                                                                                                                                                                                                                         |  |
| Official name of the Network                                                | Informationssystem Integrierte Pflanzenproduktion e.V.                                                                                                                                                                                                                                                                                                                                                                                                                                                                                                                               |                                                                                                                                                                                                                                                                                                                                         |  |
| Other names                                                                 | Information System for Integrated Plant Protection (ISIP)                                                                                                                                                                                                                                                                                                                                                                                                                                                                                                                            |                                                                                                                                                                                                                                                                                                                                         |  |
| Type of organisation                                                        | Governmental<br>Founded 2001                                                                                                                                                                                                                                                                                                                                                                                                                                                                                                                                                         |                                                                                                                                                                                                                                                                                                                                         |  |
| Coordinates                                                                 | Rüdesheimer Straße 60-68<br>55545 Bad Kreuznach<br><br>Fax: 0671 / 820-402<br>Email: <a href="mailto:office[at]isip.de">office[at]isip.de</a>                                                                                                                                                                                                                                                                                                                                                                                                                                        |                                                                                                                                                                                                                                                                                                                                         |  |
| Website                                                                     | <a href="http://www.isip.de">www.isip.de</a>                                                                                                                                                                                                                                                                                                                                                                                                                                                                                                                                         |                                                                                                                                                                                                                                                                                                                                         |  |
| Funding                                                                     | Public                                                                                                                                                                                                                                                                                                                                                                                                                                                                                                                                                                               |                                                                                                                                                                                                                                                                                                                                         |  |
| Conflict of interest                                                        | -                                                                                                                                                                                                                                                                                                                                                                                                                                                                                                                                                                                    |                                                                                                                                                                                                                                                                                                                                         |  |
| Part of other network(s)                                                    |                                                                                                                                                                                                                                                                                                                                                                                                                                                                                                                                                                                      |                                                                                                                                                                                                                                                                                                                                         |  |
| Grouping other network(s)                                                   | Groups extension services of different Länder                                                                                                                                                                                                                                                                                                                                                                                                                                                                                                                                        |                                                                                                                                                                                                                                                                                                                                         |  |
| <b>MONITORING SUBJECT</b>                                                   |                                                                                                                                                                                                                                                                                                                                                                                                                                                                                                                                                                                      |                                                                                                                                                                                                                                                                                                                                         |  |
| Description                                                                 | Monitoring of phytosanitary status of crops and recommendations                                                                                                                                                                                                                                                                                                                                                                                                                                                                                                                      |                                                                                                                                                                                                                                                                                                                                         |  |
| Protection goal(s) and/or influencing factor(s)                             | <input type="checkbox"/> Protection goal<br><br><input type="checkbox"/> Biodiversity<br><input type="checkbox"/> Human Health<br><input type="checkbox"/> Animal Health<br><input type="checkbox"/> Plant Health<br><input type="checkbox"/> Soil function<br><input type="checkbox"/> Water quality<br><input type="checkbox"/> Sustainable Agriculture                                                                                                                                                                                                                            | <input checked="" type="checkbox"/> Influencing factor<br><br><input checked="" type="checkbox"/> Agronomic practice<br><input checked="" type="checkbox"/> Plant protection<br><input type="checkbox"/> GMO cultivation<br><input checked="" type="checkbox"/> Environmental conditions                                                |  |
| Duplication of Farmer's questionnaire                                       | <input type="checkbox"/> No duplication<br><input checked="" type="checkbox"/> Partly duplication<br><input type="checkbox"/> Complete duplication                                                                                                                                                                                                                                                                                                                                                                                                                                   |                                                                                                                                                                                                                                                                                                                                         |  |
| <b>SPECIFICITY</b>                                                          |                                                                                                                                                                                                                                                                                                                                                                                                                                                                                                                                                                                      |                                                                                                                                                                                                                                                                                                                                         |  |
| Geography                                                                   | <input type="checkbox"/> EU -wide<br><br><input type="checkbox"/> Zone A – North<br><input type="checkbox"/> Denmark,<br><input type="checkbox"/> Estonia,<br><input type="checkbox"/> Latvia,<br><input type="checkbox"/> Lithuania,<br><input type="checkbox"/> Finland,<br><input type="checkbox"/> Sweden                                                                                                                                                                                                                                                                        |                                                                                                                                                                                                                                                                                                                                         |  |
|                                                                             | <input checked="" type="checkbox"/> Zone B – Centre:<br><input type="checkbox"/> Belgium,<br><input type="checkbox"/> Czech Republic<br><input checked="" type="checkbox"/> Germany,<br><input type="checkbox"/> Ireland,<br><input type="checkbox"/> Luxembourg,<br><input type="checkbox"/> Hungary,<br><input type="checkbox"/> Netherlands,<br><input type="checkbox"/> Austria,<br><input type="checkbox"/> Poland,<br><input type="checkbox"/> Romania,<br><input type="checkbox"/> Slovenia,<br><input type="checkbox"/> Slovakia,<br><input type="checkbox"/> United Kingdom | <input type="checkbox"/> Zone C – South<br><input type="checkbox"/> Bulgaria,<br><input type="checkbox"/> Greece,<br><input type="checkbox"/> Spain,<br><input type="checkbox"/> France,<br><input type="checkbox"/> Italy,<br><input type="checkbox"/> Cyprus,<br><input type="checkbox"/> Malta,<br><input type="checkbox"/> Portugal |  |
|                                                                             | <input type="checkbox"/> Regional (specify)<br><input type="checkbox"/> Local (specify)                                                                                                                                                                                                                                                                                                                                                                                                                                                                                              |                                                                                                                                                                                                                                                                                                                                         |  |
| Factors                                                                     | <input checked="" type="checkbox"/> Multiple species/items (specify): agronomic indicators<br><input type="checkbox"/> Single species/item (specify)                                                                                                                                                                                                                                                                                                                                                                                                                                 |                                                                                                                                                                                                                                                                                                                                         |  |
| Crop                                                                        | <input checked="" type="checkbox"/> No specific crop(s)<br><input type="checkbox"/> Several crops (e.g. all cereals)<br><input type="checkbox"/> Single crop                                                                                                                                                                                                                                                                                                                                                                                                                         |                                                                                                                                                                                                                                                                                                                                         |  |
| Trait /treatment                                                            | <input checked="" type="checkbox"/> No specific traits/treatments<br><input type="checkbox"/> Several traits/treatments<br><input type="checkbox"/> Single trait/treatment                                                                                                                                                                                                                                                                                                                                                                                                           |                                                                                                                                                                                                                                                                                                                                         |  |
| GMO                                                                         | <input checked="" type="checkbox"/> No GMO bias<br><input checked="" type="checkbox"/> GMO specific (1 theme)                                                                                                                                                                                                                                                                                                                                                                                                                                                                        |                                                                                                                                                                                                                                                                                                                                         |  |
| <b>METHODOLOGY</b>                                                          |                                                                                                                                                                                                                                                                                                                                                                                                                                                                                                                                                                                      |                                                                                                                                                                                                                                                                                                                                         |  |
| Observations                                                                | <input checked="" type="checkbox"/> Reported, verifiable methodology                                                                                                                                                                                                                                                                                                                                                                                                                                                                                                                 |                                                                                                                                                                                                                                                                                                                                         |  |

|                                    |                                                                                                                                                                                                                                                                        |
|------------------------------------|------------------------------------------------------------------------------------------------------------------------------------------------------------------------------------------------------------------------------------------------------------------------|
|                                    | <input type="checkbox"/> Reported, unverifiable methodology<br><input type="checkbox"/> Unknown, unverifiable methodology                                                                                                                                              |
| Frequency                          | <input checked="" type="checkbox"/> > 1 time/year<br><input type="checkbox"/> 1 time/year<br><input type="checkbox"/> < 1 time/year                                                                                                                                    |
| Future                             | <input checked="" type="checkbox"/> For ≥ 5 years<br><input type="checkbox"/> between 1 and 5 years<br><input type="checkbox"/> no prospect                                                                                                                            |
| Quality of performers              | <input checked="" type="checkbox"/> Trained, professionals<br><input type="checkbox"/> Trained, non-professionals – training by documentation, volunteers<br><input type="checkbox"/> Uncertain or not -specified                                                      |
| Quality of data                    | <input checked="" type="checkbox"/> Standard recording of raw data<br><input type="checkbox"/> Free recording of raw data<br><input type="checkbox"/> Anecdotic                                                                                                        |
| Analysis                           | <input checked="" type="checkbox"/> Reported, verifiable methodology<br><input type="checkbox"/> Reported, unverifiable methodology<br><input type="checkbox"/> Unknown, unverifiable methodology                                                                      |
| Quality of analysis                | <input checked="" type="checkbox"/> Scientifically based<br><input type="checkbox"/> Indicative only<br><input type="checkbox"/> Unknown                                                                                                                               |
| <b>REPORTING</b>                   |                                                                                                                                                                                                                                                                        |
| Language                           | Reporting language(s): German                                                                                                                                                                                                                                          |
| Availability                       | <input type="checkbox"/> Scientific publication<br><input checked="" type="checkbox"/> Official report available on the internet or in other public forum<br><input type="checkbox"/> Official report available from network<br><input type="checkbox"/> Not available |
| Frequency                          | <input checked="" type="checkbox"/> ≥ 1 time/year<br><input type="checkbox"/> < 1 time/year                                                                                                                                                                            |
| Historical reference               | <input checked="" type="checkbox"/> over ≥ 5 years<br><input type="checkbox"/> between 1 and 5 years<br><input type="checkbox"/> no historical analysis                                                                                                                |
| <b>COMMENT(S)</b>                  |                                                                                                                                                                                                                                                                        |
| Network for agronomic information. |                                                                                                                                                                                                                                                                        |

## Hungary

## GSEN-09-0001.00.2 HU – Plant, Soil & Agri environment

| EuropaBio's coordinated approach to General Surveillance: Existing Networks |                                                                                                                                                                                                                                                                                                                                                                                      |                                                                                                                                                                                                                                                                                                                                                                                                                                                                                                                              |                                                                                                                                                                                                                                                                                              |
|-----------------------------------------------------------------------------|--------------------------------------------------------------------------------------------------------------------------------------------------------------------------------------------------------------------------------------------------------------------------------------------------------------------------------------------------------------------------------------|------------------------------------------------------------------------------------------------------------------------------------------------------------------------------------------------------------------------------------------------------------------------------------------------------------------------------------------------------------------------------------------------------------------------------------------------------------------------------------------------------------------------------|----------------------------------------------------------------------------------------------------------------------------------------------------------------------------------------------------------------------------------------------------------------------------------------------|
| <b>ORGANISATION</b>                                                         |                                                                                                                                                                                                                                                                                                                                                                                      |                                                                                                                                                                                                                                                                                                                                                                                                                                                                                                                              |                                                                                                                                                                                                                                                                                              |
| EuropaBio reference                                                         | GS-EN-09-0001                                                                                                                                                                                                                                                                                                                                                                        |                                                                                                                                                                                                                                                                                                                                                                                                                                                                                                                              |                                                                                                                                                                                                                                                                                              |
| Official name of the Network                                                | <b>Mezőgazdasági Szakigazgatási Hivatal (MgSzH)<br/>Növény- Talaj- és Agrár-környezetvédelem</b>                                                                                                                                                                                                                                                                                     |                                                                                                                                                                                                                                                                                                                                                                                                                                                                                                                              |                                                                                                                                                                                                                                                                                              |
| Other names                                                                 | Ministry of Agriculture: Office of Plant, Soil and Agri-environment                                                                                                                                                                                                                                                                                                                  |                                                                                                                                                                                                                                                                                                                                                                                                                                                                                                                              |                                                                                                                                                                                                                                                                                              |
| Type of organisation                                                        | Governmental                                                                                                                                                                                                                                                                                                                                                                         |                                                                                                                                                                                                                                                                                                                                                                                                                                                                                                                              |                                                                                                                                                                                                                                                                                              |
| Coordinates                                                                 | Keleti Károly u. 24.<br>1024 Budapest<br><br>Fax: 06-1-336-9479                                                                                                                                                                                                                                                                                                                      |                                                                                                                                                                                                                                                                                                                                                                                                                                                                                                                              |                                                                                                                                                                                                                                                                                              |
| Website                                                                     | <a href="http://www.nebih.gov.hu/szakteruletek/szakteruletek/noveny_talajvedelmi_ig/altalanos_informaciok">http://www.nebih.gov.hu/szakteruletek/szakteruletek/noveny_talajvedelmi_ig/altalanos_informaciok</a>                                                                                                                                                                      |                                                                                                                                                                                                                                                                                                                                                                                                                                                                                                                              |                                                                                                                                                                                                                                                                                              |
| Funding                                                                     | Public                                                                                                                                                                                                                                                                                                                                                                               |                                                                                                                                                                                                                                                                                                                                                                                                                                                                                                                              |                                                                                                                                                                                                                                                                                              |
| Conflict of interest                                                        | -                                                                                                                                                                                                                                                                                                                                                                                    |                                                                                                                                                                                                                                                                                                                                                                                                                                                                                                                              |                                                                                                                                                                                                                                                                                              |
| Part of other network(s)                                                    |                                                                                                                                                                                                                                                                                                                                                                                      |                                                                                                                                                                                                                                                                                                                                                                                                                                                                                                                              |                                                                                                                                                                                                                                                                                              |
| Grouping other network(s)                                                   | Including regional offices                                                                                                                                                                                                                                                                                                                                                           |                                                                                                                                                                                                                                                                                                                                                                                                                                                                                                                              |                                                                                                                                                                                                                                                                                              |
| <b>MONITORING SUBJECT</b>                                                   |                                                                                                                                                                                                                                                                                                                                                                                      |                                                                                                                                                                                                                                                                                                                                                                                                                                                                                                                              |                                                                                                                                                                                                                                                                                              |
| Description                                                                 | Monitoring plant soil and the agro-environment.                                                                                                                                                                                                                                                                                                                                      |                                                                                                                                                                                                                                                                                                                                                                                                                                                                                                                              |                                                                                                                                                                                                                                                                                              |
| Protection goal(s) and/or influencing factor(s)                             | <input checked="" type="checkbox"/> Protection goal<br><input type="checkbox"/> Biodiversity: general<br><input type="checkbox"/> Human Health<br><input type="checkbox"/> Animal Health<br><input type="checkbox"/> Plant Health<br><input type="checkbox"/> Soil function<br><input type="checkbox"/> Water quality<br><input checked="" type="checkbox"/> Sustainable Agriculture | <input checked="" type="checkbox"/> Influencing factor<br><input checked="" type="checkbox"/> Agronomic practice<br><input checked="" type="checkbox"/> Plant protection<br><input type="checkbox"/> GMO cultivation<br><input type="checkbox"/> Environmental conditions                                                                                                                                                                                                                                                    |                                                                                                                                                                                                                                                                                              |
| Duplication of Farmer's questionnaire                                       | <input checked="" type="checkbox"/> No duplication<br><input type="checkbox"/> Partly duplication<br><input type="checkbox"/> Complete duplication                                                                                                                                                                                                                                   |                                                                                                                                                                                                                                                                                                                                                                                                                                                                                                                              |                                                                                                                                                                                                                                                                                              |
| <b>SPECIFICITY</b>                                                          |                                                                                                                                                                                                                                                                                                                                                                                      |                                                                                                                                                                                                                                                                                                                                                                                                                                                                                                                              |                                                                                                                                                                                                                                                                                              |
| Geography                                                                   | <input type="checkbox"/> EU –wide<br><input type="checkbox"/> Zone A – North<br><input checked="" type="checkbox"/> Zone B – Centre:<br><input type="checkbox"/> Zone C – South                                                                                                                                                                                                      |                                                                                                                                                                                                                                                                                                                                                                                                                                                                                                                              |                                                                                                                                                                                                                                                                                              |
|                                                                             | <input type="checkbox"/> Denmark,<br><input type="checkbox"/> Estonia,<br><input type="checkbox"/> Latvia,<br><input type="checkbox"/> Lithuania,<br><input type="checkbox"/> Finland,<br><input type="checkbox"/> Sweden                                                                                                                                                            | <input type="checkbox"/> Belgium,<br><input type="checkbox"/> Czech Republic<br><input type="checkbox"/> Germany,<br><input type="checkbox"/> Ireland,<br><input type="checkbox"/> Luxembourg,<br><input checked="" type="checkbox"/> Hungary,<br><input type="checkbox"/> Netherlands,<br><input type="checkbox"/> Austria,<br><input type="checkbox"/> Poland,<br><input type="checkbox"/> Romania,<br><input type="checkbox"/> Slovenia,<br><input type="checkbox"/> Slovakia,<br><input type="checkbox"/> United Kingdom | <input type="checkbox"/> Bulgaria,<br><input type="checkbox"/> Greece,<br><input type="checkbox"/> Spain,<br><input type="checkbox"/> France,<br><input type="checkbox"/> Italy,<br><input type="checkbox"/> Cyprus,<br><input type="checkbox"/> Malta,<br><input type="checkbox"/> Portugal |
|                                                                             | <input type="checkbox"/> Regional (specify)<br><input type="checkbox"/> Local (specify)                                                                                                                                                                                                                                                                                              |                                                                                                                                                                                                                                                                                                                                                                                                                                                                                                                              |                                                                                                                                                                                                                                                                                              |
| Factors                                                                     | <input checked="" type="checkbox"/> Multiple species/items (specify): crops, animal husbandry<br><input type="checkbox"/> Single species/item (specify)                                                                                                                                                                                                                              |                                                                                                                                                                                                                                                                                                                                                                                                                                                                                                                              |                                                                                                                                                                                                                                                                                              |
| Crop                                                                        | <input checked="" type="checkbox"/> No specific crop(s)<br><input type="checkbox"/> Several crops (e.g. all cereals)<br><input type="checkbox"/> Single crop                                                                                                                                                                                                                         |                                                                                                                                                                                                                                                                                                                                                                                                                                                                                                                              |                                                                                                                                                                                                                                                                                              |
| Trait /treatment                                                            | <input checked="" type="checkbox"/> No specific traits/treatments<br><input type="checkbox"/> Several traits/treatments<br><input type="checkbox"/> Single trait/treatment                                                                                                                                                                                                           |                                                                                                                                                                                                                                                                                                                                                                                                                                                                                                                              |                                                                                                                                                                                                                                                                                              |
| GMO                                                                         | <input checked="" type="checkbox"/> No GMO bias<br><input type="checkbox"/> GMO specific                                                                                                                                                                                                                                                                                             |                                                                                                                                                                                                                                                                                                                                                                                                                                                                                                                              |                                                                                                                                                                                                                                                                                              |
| <b>METHODOLOGY</b>                                                          |                                                                                                                                                                                                                                                                                                                                                                                      |                                                                                                                                                                                                                                                                                                                                                                                                                                                                                                                              |                                                                                                                                                                                                                                                                                              |
| Observations                                                                | <input type="checkbox"/> Reported, verifiable methodology                                                                                                                                                                                                                                                                                                                            |                                                                                                                                                                                                                                                                                                                                                                                                                                                                                                                              |                                                                                                                                                                                                                                                                                              |



|                                     |                                                                                                                                                                                                                                                                                                     |
|-------------------------------------|-----------------------------------------------------------------------------------------------------------------------------------------------------------------------------------------------------------------------------------------------------------------------------------------------------|
|                                     | <input type="checkbox"/> Reported, unverifiable methodology<br><input checked="" type="checkbox"/> Unknown, unverifiable methodology                                                                                                                                                                |
| Frequency                           | <input type="checkbox"/> > 1 time/year: birds<br><input type="checkbox"/> 1 time/year:<br><input type="checkbox"/> < 1 time/year                                                                                                                                                                    |
| Future                              | <input checked="" type="checkbox"/> For ≥ 5 years<br><input type="checkbox"/> between 1 and 5 years<br><input type="checkbox"/> no prospect                                                                                                                                                         |
| Quality of performers               | <input checked="" type="checkbox"/> Trained, professionals<br><input type="checkbox"/> Trained, non-professionals – volunteers<br><input type="checkbox"/> Uncertain or not –specified                                                                                                              |
| Quality of data                     | <input type="checkbox"/> Standard recording of raw data<br><input type="checkbox"/> Free recording of raw data<br><input type="checkbox"/> Anecdotic                                                                                                                                                |
| Analysis                            | <input type="checkbox"/> Reported, verifiable methodology<br><input type="checkbox"/> Reported, unverifiable methodology<br><input checked="" type="checkbox"/> Unknown, unverifiable methodology                                                                                                   |
| Quality of analysis                 | <input type="checkbox"/> Scientifically based<br><input type="checkbox"/> Indicative only<br><input checked="" type="checkbox"/> Unknown                                                                                                                                                            |
| <b>REPORTING</b>                    |                                                                                                                                                                                                                                                                                                     |
| Language                            | <input checked="" type="checkbox"/> Specify reporting language(s): Hungarian                                                                                                                                                                                                                        |
| Availability                        | <input type="checkbox"/> Scientific publication<br><input type="checkbox"/> Official report (not yet) available on the internet or in other public forum: graphs on website<br><input type="checkbox"/> Official report available from network<br><input checked="" type="checkbox"/> Not available |
| Frequency                           | <input type="checkbox"/> ≥ 1 time/year –<br><input type="checkbox"/> < 1 time/year –                                                                                                                                                                                                                |
| Historical reference                | <input type="checkbox"/> over ≥ 5 years<br><input type="checkbox"/> between 1 and 5 years<br><input checked="" type="checkbox"/> no historical analysis                                                                                                                                             |
| <b>COMMENT(S)</b>                   |                                                                                                                                                                                                                                                                                                     |
| Monitoring plant soil and the agro. |                                                                                                                                                                                                                                                                                                     |

## GSEN-09-0002.00.2 HU – Environmental and Nature Conservation Inspection Service

| EuropaBio's coordinated approach to General Surveillance: Existing Networks |                                                                                                                                                                                                                                                                                                                                                                                                            |                                                                                                                                                                                                                                                                                                                                                                                                                                                                                                                              |                                                                                                                                                                                                                                                                                              |
|-----------------------------------------------------------------------------|------------------------------------------------------------------------------------------------------------------------------------------------------------------------------------------------------------------------------------------------------------------------------------------------------------------------------------------------------------------------------------------------------------|------------------------------------------------------------------------------------------------------------------------------------------------------------------------------------------------------------------------------------------------------------------------------------------------------------------------------------------------------------------------------------------------------------------------------------------------------------------------------------------------------------------------------|----------------------------------------------------------------------------------------------------------------------------------------------------------------------------------------------------------------------------------------------------------------------------------------------|
| ORGANISATION                                                                |                                                                                                                                                                                                                                                                                                                                                                                                            |                                                                                                                                                                                                                                                                                                                                                                                                                                                                                                                              |                                                                                                                                                                                                                                                                                              |
| EuropaBio reference                                                         | GS-EN-09-0002                                                                                                                                                                                                                                                                                                                                                                                              |                                                                                                                                                                                                                                                                                                                                                                                                                                                                                                                              |                                                                                                                                                                                                                                                                                              |
| Official name of the Network                                                | Környezetvédelmi, Természetvédelmi és Vízügyi Felügyelőségek                                                                                                                                                                                                                                                                                                                                               |                                                                                                                                                                                                                                                                                                                                                                                                                                                                                                                              |                                                                                                                                                                                                                                                                                              |
| Other names                                                                 | Environmental and Nature Conservation Inspection Service<br>Vadonleső program                                                                                                                                                                                                                                                                                                                              |                                                                                                                                                                                                                                                                                                                                                                                                                                                                                                                              |                                                                                                                                                                                                                                                                                              |
| Type of organisation                                                        | Governmental<br>Founded (unknown)                                                                                                                                                                                                                                                                                                                                                                          |                                                                                                                                                                                                                                                                                                                                                                                                                                                                                                                              |                                                                                                                                                                                                                                                                                              |
| Coordinates                                                                 | Ministry of Environment<br>Address: 1011 Budapest, 44-50 Main Street.<br>Mailing address: 1394 Budapest, PO Box: 351<br><br>Fax: +36 1 457-3354<br>Email: <a href="mailto:info[at]mail.kvvm.hu">info[at]mail.kvvm.hu</a><br><br>VADONLESŐ Center<br>Kvvm, Conservation Department<br>1011 Budapest<br>Main street 44-50<br>Email: <a href="mailto:vadonleso[at]mail.kvvm.hu">vadonleso[at]mail.kvvm.hu</a> |                                                                                                                                                                                                                                                                                                                                                                                                                                                                                                                              |                                                                                                                                                                                                                                                                                              |
| Website                                                                     | <a href="http://www.kvvm.hu/">http://www.kvvm.hu/</a><br><a href="http://www.termeszetvedelem.hu/">http://www.termeszetvedelem.hu/</a><br><a href="http://www.vadonleso.hu/kapcsolat/">http://www.vadonleso.hu/kapcsolat/</a><br><br><a href="http://www.termeszetvedelem.hu/hbms">http://www.termeszetvedelem.hu/hbms</a> monitoring system                                                               |                                                                                                                                                                                                                                                                                                                                                                                                                                                                                                                              |                                                                                                                                                                                                                                                                                              |
| Funding                                                                     | Public                                                                                                                                                                                                                                                                                                                                                                                                     |                                                                                                                                                                                                                                                                                                                                                                                                                                                                                                                              |                                                                                                                                                                                                                                                                                              |
| Conflict of interest                                                        | -                                                                                                                                                                                                                                                                                                                                                                                                          |                                                                                                                                                                                                                                                                                                                                                                                                                                                                                                                              |                                                                                                                                                                                                                                                                                              |
| Part of other network(s)                                                    | - National Biodiversity-monitoring system                                                                                                                                                                                                                                                                                                                                                                  |                                                                                                                                                                                                                                                                                                                                                                                                                                                                                                                              |                                                                                                                                                                                                                                                                                              |
| Grouping other network(s)                                                   |                                                                                                                                                                                                                                                                                                                                                                                                            |                                                                                                                                                                                                                                                                                                                                                                                                                                                                                                                              |                                                                                                                                                                                                                                                                                              |
| MONITORING SUBJECT                                                          |                                                                                                                                                                                                                                                                                                                                                                                                            |                                                                                                                                                                                                                                                                                                                                                                                                                                                                                                                              |                                                                                                                                                                                                                                                                                              |
| Description                                                                 | Monitoring biodiversity using indicator species.                                                                                                                                                                                                                                                                                                                                                           |                                                                                                                                                                                                                                                                                                                                                                                                                                                                                                                              |                                                                                                                                                                                                                                                                                              |
| Protection goal(s) and/or influencing factor(s)                             | <input checked="" type="checkbox"/> Protection goal                                                                                                                                                                                                                                                                                                                                                        | <input type="checkbox"/> Influencing factor                                                                                                                                                                                                                                                                                                                                                                                                                                                                                  |                                                                                                                                                                                                                                                                                              |
|                                                                             | <input checked="" type="checkbox"/> Biodiversity: general<br><input type="checkbox"/> Human Health<br><input type="checkbox"/> Animal Health<br><input type="checkbox"/> Plant Health<br><input checked="" type="checkbox"/> Soil function<br><input checked="" type="checkbox"/> Water quality<br><input type="checkbox"/> Sustainable Agriculture                                                        | <input type="checkbox"/> Agronomic practice<br><input type="checkbox"/> Plant protection<br><input type="checkbox"/> GMO cultivation<br><input type="checkbox"/> Environmental conditions                                                                                                                                                                                                                                                                                                                                    |                                                                                                                                                                                                                                                                                              |
| Duplication of Farmer's questionnaire                                       | <input checked="" type="checkbox"/> No duplication<br><input type="checkbox"/> Partly duplication<br><input type="checkbox"/> Complete duplication                                                                                                                                                                                                                                                         |                                                                                                                                                                                                                                                                                                                                                                                                                                                                                                                              |                                                                                                                                                                                                                                                                                              |
| SPECIFICITY                                                                 |                                                                                                                                                                                                                                                                                                                                                                                                            |                                                                                                                                                                                                                                                                                                                                                                                                                                                                                                                              |                                                                                                                                                                                                                                                                                              |
| Geography                                                                   | <input type="checkbox"/> EU –wide                                                                                                                                                                                                                                                                                                                                                                          |                                                                                                                                                                                                                                                                                                                                                                                                                                                                                                                              |                                                                                                                                                                                                                                                                                              |
|                                                                             | <input type="checkbox"/> Zone A – North                                                                                                                                                                                                                                                                                                                                                                    | <input checked="" type="checkbox"/> Zone B – Centre:                                                                                                                                                                                                                                                                                                                                                                                                                                                                         | <input type="checkbox"/> Zone C – South                                                                                                                                                                                                                                                      |
|                                                                             | <input type="checkbox"/> Denmark,<br><input type="checkbox"/> Estonia,<br><input type="checkbox"/> Latvia,<br><input type="checkbox"/> Lithuania,<br><input type="checkbox"/> Finland,<br><input type="checkbox"/> Sweden                                                                                                                                                                                  | <input type="checkbox"/> Belgium,<br><input type="checkbox"/> Czech Republic<br><input type="checkbox"/> Germany,<br><input type="checkbox"/> Ireland,<br><input type="checkbox"/> Luxembourg,<br><input checked="" type="checkbox"/> Hungary,<br><input type="checkbox"/> Netherlands,<br><input type="checkbox"/> Austria,<br><input type="checkbox"/> Poland,<br><input type="checkbox"/> Romania,<br><input type="checkbox"/> Slovenia,<br><input type="checkbox"/> Slovakia,<br><input type="checkbox"/> United Kingdom | <input type="checkbox"/> Bulgaria,<br><input type="checkbox"/> Greece,<br><input type="checkbox"/> Spain,<br><input type="checkbox"/> France,<br><input type="checkbox"/> Italy,<br><input type="checkbox"/> Cyprus,<br><input type="checkbox"/> Malta,<br><input type="checkbox"/> Portugal |
|                                                                             | <input type="checkbox"/> Regional (specify)<br><input type="checkbox"/> Local (specify)                                                                                                                                                                                                                                                                                                                    |                                                                                                                                                                                                                                                                                                                                                                                                                                                                                                                              |                                                                                                                                                                                                                                                                                              |
| Factors                                                                     | <input checked="" type="checkbox"/> Multiple species/items (specify): mammals, amphibians, reptiles, beetles, butterflies, plants                                                                                                                                                                                                                                                                          |                                                                                                                                                                                                                                                                                                                                                                                                                                                                                                                              |                                                                                                                                                                                                                                                                                              |

|                                                                                                                                                                           |                                                                                                                                                                                                                                                                                                     |
|---------------------------------------------------------------------------------------------------------------------------------------------------------------------------|-----------------------------------------------------------------------------------------------------------------------------------------------------------------------------------------------------------------------------------------------------------------------------------------------------|
|                                                                                                                                                                           | <input type="checkbox"/> Single species/item (specify)                                                                                                                                                                                                                                              |
| Crop                                                                                                                                                                      | <input checked="" type="checkbox"/> No specific crop(s)<br><input type="checkbox"/> Several crops (e.g. all cereals)<br><input type="checkbox"/> Single crop                                                                                                                                        |
| Trait /treatment                                                                                                                                                          | <input checked="" type="checkbox"/> No specific traits/treatments<br><input type="checkbox"/> Several traits/treatments<br><input type="checkbox"/> Single trait/treatment                                                                                                                          |
| GMO                                                                                                                                                                       | <input checked="" type="checkbox"/> No GMO bias<br><input type="checkbox"/> GMO specific                                                                                                                                                                                                            |
| <b>METHODOLOGY</b>                                                                                                                                                        |                                                                                                                                                                                                                                                                                                     |
| Observations                                                                                                                                                              | <input type="checkbox"/> Reported, verifiable methodology<br><input type="checkbox"/> Reported, unverifiable methodology<br><input checked="" type="checkbox"/> Unknown, unverifiable methodology                                                                                                   |
| Frequency                                                                                                                                                                 | <input type="checkbox"/> > 1 time/year: birds<br><input type="checkbox"/> 1 time/year:<br><input type="checkbox"/> < 1 time/year                                                                                                                                                                    |
| Future                                                                                                                                                                    | <input checked="" type="checkbox"/> For ≥ 5 years<br><input type="checkbox"/> between 1 and 5 years<br><input type="checkbox"/> no prospect                                                                                                                                                         |
| Quality of performers                                                                                                                                                     | <input checked="" type="checkbox"/> Trained, professionals<br><input checked="" type="checkbox"/> Trained, non-professionals – volunteers<br><input type="checkbox"/> Uncertain or not –specified                                                                                                   |
| Quality of data                                                                                                                                                           | <input type="checkbox"/> Standard recording of raw data<br><input type="checkbox"/> Free recording of raw data<br><input type="checkbox"/> Anecdotic                                                                                                                                                |
| Analysis                                                                                                                                                                  | <input type="checkbox"/> Reported, verifiable methodology<br><input type="checkbox"/> Reported, unverifiable methodology<br><input checked="" type="checkbox"/> Unknown, unverifiable methodology                                                                                                   |
| Quality of analysis                                                                                                                                                       | <input checked="" type="checkbox"/> Scientifically based<br><input type="checkbox"/> Indicative only<br><input type="checkbox"/> Unknown                                                                                                                                                            |
| <b>REPORTING</b>                                                                                                                                                          |                                                                                                                                                                                                                                                                                                     |
| Language                                                                                                                                                                  | <input checked="" type="checkbox"/> Specify reporting language(s) ?                                                                                                                                                                                                                                 |
| Availability                                                                                                                                                              | <input type="checkbox"/> Scientific publication<br><input checked="" type="checkbox"/> Official report (not yet) available on the internet or in other public forum: graphs on website<br><input type="checkbox"/> Official report available from network<br><input type="checkbox"/> Not available |
| Frequency                                                                                                                                                                 | <input type="checkbox"/> ≥ 1 time/year –<br><input type="checkbox"/> < 1 time/year –                                                                                                                                                                                                                |
| Historical reference                                                                                                                                                      | <input checked="" type="checkbox"/> over ≥ 5 years<br><input type="checkbox"/> between 1 and 5 years<br><input type="checkbox"/> no historical analysis                                                                                                                                             |
| <b>COMMENT(S)</b>                                                                                                                                                         |                                                                                                                                                                                                                                                                                                     |
| Large program to monitor biodiversity indicator groups (mammals, amphibians and reptiles, beetles, butterflies, plants);<br>Established routine for water & soil quality. |                                                                                                                                                                                                                                                                                                     |

## GSEN-09-0003.00.2 HU – National Public Health Service

| EuropaBio's coordinated approach to General Surveillance: Existing Networks |                                                                                                                                                                                                                                                                                                                               |                                                                                                                                                                                                                                                                                                                                                                                                                                                                                                                              |                                                                                                                                                                                                                                                                                              |
|-----------------------------------------------------------------------------|-------------------------------------------------------------------------------------------------------------------------------------------------------------------------------------------------------------------------------------------------------------------------------------------------------------------------------|------------------------------------------------------------------------------------------------------------------------------------------------------------------------------------------------------------------------------------------------------------------------------------------------------------------------------------------------------------------------------------------------------------------------------------------------------------------------------------------------------------------------------|----------------------------------------------------------------------------------------------------------------------------------------------------------------------------------------------------------------------------------------------------------------------------------------------|
| ORGANISATION                                                                |                                                                                                                                                                                                                                                                                                                               |                                                                                                                                                                                                                                                                                                                                                                                                                                                                                                                              |                                                                                                                                                                                                                                                                                              |
| EuropaBio reference                                                         | GS-EN-09-0003                                                                                                                                                                                                                                                                                                                 |                                                                                                                                                                                                                                                                                                                                                                                                                                                                                                                              |                                                                                                                                                                                                                                                                                              |
| Official name of the Network                                                | Állami Népegészségügyi és Tisztiorvosi Szolgálat (ÁNTSZ)                                                                                                                                                                                                                                                                      |                                                                                                                                                                                                                                                                                                                                                                                                                                                                                                                              |                                                                                                                                                                                                                                                                                              |
| Other names                                                                 | National Public Health Service                                                                                                                                                                                                                                                                                                |                                                                                                                                                                                                                                                                                                                                                                                                                                                                                                                              |                                                                                                                                                                                                                                                                                              |
| Type of organisation                                                        | Governmental                                                                                                                                                                                                                                                                                                                  |                                                                                                                                                                                                                                                                                                                                                                                                                                                                                                                              |                                                                                                                                                                                                                                                                                              |
| Coordinates                                                                 | Hungarian Biocidal Information Service<br>Albert Flórián út 2-6<br>1097 Budapest                                                                                                                                                                                                                                              |                                                                                                                                                                                                                                                                                                                                                                                                                                                                                                                              |                                                                                                                                                                                                                                                                                              |
| Website                                                                     | <a href="http://www.antsz.hu/">http://www.antsz.hu/</a>                                                                                                                                                                                                                                                                       |                                                                                                                                                                                                                                                                                                                                                                                                                                                                                                                              |                                                                                                                                                                                                                                                                                              |
| Funding                                                                     | public                                                                                                                                                                                                                                                                                                                        |                                                                                                                                                                                                                                                                                                                                                                                                                                                                                                                              |                                                                                                                                                                                                                                                                                              |
| Conflict of interest                                                        | -                                                                                                                                                                                                                                                                                                                             |                                                                                                                                                                                                                                                                                                                                                                                                                                                                                                                              |                                                                                                                                                                                                                                                                                              |
| Part of other network(s)                                                    | --                                                                                                                                                                                                                                                                                                                            |                                                                                                                                                                                                                                                                                                                                                                                                                                                                                                                              |                                                                                                                                                                                                                                                                                              |
| Grouping other network(s)                                                   |                                                                                                                                                                                                                                                                                                                               |                                                                                                                                                                                                                                                                                                                                                                                                                                                                                                                              |                                                                                                                                                                                                                                                                                              |
| MONITORING SUBJECT                                                          |                                                                                                                                                                                                                                                                                                                               |                                                                                                                                                                                                                                                                                                                                                                                                                                                                                                                              |                                                                                                                                                                                                                                                                                              |
| Description                                                                 | Monitoring public health.                                                                                                                                                                                                                                                                                                     |                                                                                                                                                                                                                                                                                                                                                                                                                                                                                                                              |                                                                                                                                                                                                                                                                                              |
| Protection goal(s) and/or influencing factor(s)                             | <input checked="" type="checkbox"/> Protection goal                                                                                                                                                                                                                                                                           | <input type="checkbox"/> Influencing factor                                                                                                                                                                                                                                                                                                                                                                                                                                                                                  |                                                                                                                                                                                                                                                                                              |
|                                                                             | <input type="checkbox"/> Biodiversity: general<br><input checked="" type="checkbox"/> Human Health<br><input type="checkbox"/> Animal Health<br><input type="checkbox"/> Plant Health<br><input type="checkbox"/> Soil function<br><input type="checkbox"/> Water quality<br><input type="checkbox"/> Sustainable Agriculture | <input type="checkbox"/> Agronomic practice<br><input type="checkbox"/> Plant protection<br><input type="checkbox"/> GMO cultivation<br><input type="checkbox"/> Environmental conditions                                                                                                                                                                                                                                                                                                                                    |                                                                                                                                                                                                                                                                                              |
| Duplication of Farmer's questionnaire                                       | <input checked="" type="checkbox"/> No duplication<br><input type="checkbox"/> Partly duplication<br><input type="checkbox"/> Complete duplication                                                                                                                                                                            |                                                                                                                                                                                                                                                                                                                                                                                                                                                                                                                              |                                                                                                                                                                                                                                                                                              |
| SPECIFICITY                                                                 |                                                                                                                                                                                                                                                                                                                               |                                                                                                                                                                                                                                                                                                                                                                                                                                                                                                                              |                                                                                                                                                                                                                                                                                              |
| Geography                                                                   | <input type="checkbox"/> EU –wide                                                                                                                                                                                                                                                                                             |                                                                                                                                                                                                                                                                                                                                                                                                                                                                                                                              |                                                                                                                                                                                                                                                                                              |
|                                                                             | <input type="checkbox"/> Zone A – North                                                                                                                                                                                                                                                                                       | <input checked="" type="checkbox"/> Zone B – Centre:                                                                                                                                                                                                                                                                                                                                                                                                                                                                         | <input type="checkbox"/> Zone C – South                                                                                                                                                                                                                                                      |
|                                                                             | <input type="checkbox"/> Denmark,<br><input type="checkbox"/> Estonia,<br><input type="checkbox"/> Latvia,<br><input type="checkbox"/> Lithuania,<br><input type="checkbox"/> Finland,<br><input type="checkbox"/> Sweden                                                                                                     | <input type="checkbox"/> Belgium,<br><input type="checkbox"/> Czech Republic<br><input type="checkbox"/> Germany,<br><input type="checkbox"/> Ireland,<br><input type="checkbox"/> Luxembourg,<br><input checked="" type="checkbox"/> Hungary,<br><input type="checkbox"/> Netherlands,<br><input type="checkbox"/> Austria,<br><input type="checkbox"/> Poland,<br><input type="checkbox"/> Romania,<br><input type="checkbox"/> Slovenia,<br><input type="checkbox"/> Slovakia,<br><input type="checkbox"/> United Kingdom | <input type="checkbox"/> Bulgaria,<br><input type="checkbox"/> Greece,<br><input type="checkbox"/> Spain,<br><input type="checkbox"/> France,<br><input type="checkbox"/> Italy,<br><input type="checkbox"/> Cyprus,<br><input type="checkbox"/> Malta,<br><input type="checkbox"/> Portugal |
|                                                                             | <input type="checkbox"/> Regional (specify)<br><input type="checkbox"/> Local (specify)                                                                                                                                                                                                                                       |                                                                                                                                                                                                                                                                                                                                                                                                                                                                                                                              |                                                                                                                                                                                                                                                                                              |
| Factors                                                                     | <input type="checkbox"/> Multiple species/items (specify):<br><input type="checkbox"/> Single species/item (specify)                                                                                                                                                                                                          |                                                                                                                                                                                                                                                                                                                                                                                                                                                                                                                              |                                                                                                                                                                                                                                                                                              |
| Crop                                                                        | <input type="checkbox"/> No specific crop(s)<br><input type="checkbox"/> Several crops (e.g. all cereals)<br><input type="checkbox"/> Single crop                                                                                                                                                                             |                                                                                                                                                                                                                                                                                                                                                                                                                                                                                                                              |                                                                                                                                                                                                                                                                                              |
| Trait /treatment                                                            | <input type="checkbox"/> No specific traits/treatments<br><input type="checkbox"/> Several traits/treatments<br><input type="checkbox"/> Single trait/treatment                                                                                                                                                               |                                                                                                                                                                                                                                                                                                                                                                                                                                                                                                                              |                                                                                                                                                                                                                                                                                              |
| GMO                                                                         | <input type="checkbox"/> No GMO bias<br><input type="checkbox"/> GMO specific                                                                                                                                                                                                                                                 |                                                                                                                                                                                                                                                                                                                                                                                                                                                                                                                              |                                                                                                                                                                                                                                                                                              |
| METHODOLOGY                                                                 |                                                                                                                                                                                                                                                                                                                               |                                                                                                                                                                                                                                                                                                                                                                                                                                                                                                                              |                                                                                                                                                                                                                                                                                              |
| Observations                                                                | <input type="checkbox"/> Reported, verifiable methodology<br><input type="checkbox"/> Reported, unverifiable methodology<br><input type="checkbox"/> Unknown, unverifiable methodology                                                                                                                                        |                                                                                                                                                                                                                                                                                                                                                                                                                                                                                                                              |                                                                                                                                                                                                                                                                                              |

|                           |                                                                                                                                                                                                                                                                                                     |
|---------------------------|-----------------------------------------------------------------------------------------------------------------------------------------------------------------------------------------------------------------------------------------------------------------------------------------------------|
| Frequency                 | <input type="checkbox"/> > 1 time/year: birds<br><input type="checkbox"/> 1 time/year:<br><input type="checkbox"/> < 1 time/year                                                                                                                                                                    |
| Future                    | <input type="checkbox"/> For $\geq$ 5 years<br><input type="checkbox"/> between 1 and 5 years<br><input type="checkbox"/> no prospect                                                                                                                                                               |
| Quality of performers     | <input checked="" type="checkbox"/> Trained, professionals<br><input type="checkbox"/> Trained, non-professionals – volunteers<br><input type="checkbox"/> Uncertain or not –specified                                                                                                              |
| Quality of data           | <input type="checkbox"/> Standard recording of raw data<br><input type="checkbox"/> Free recording of raw data<br><input type="checkbox"/> Anecdotic                                                                                                                                                |
| Analysis                  | <input type="checkbox"/> Reported, verifiable methodology<br><input type="checkbox"/> Reported, unverifiable methodology<br><input type="checkbox"/> Unknown, unverifiable methodology                                                                                                              |
| Quality of analysis       | <input type="checkbox"/> Scientifically based<br><input type="checkbox"/> Indicative only<br><input type="checkbox"/> Unknown                                                                                                                                                                       |
| <b>REPORTING</b>          |                                                                                                                                                                                                                                                                                                     |
| Language                  | <input type="checkbox"/> Specify reporting language(s):                                                                                                                                                                                                                                             |
| Availability              | <input type="checkbox"/> Scientific publication<br><input checked="" type="checkbox"/> Official report (not yet) available on the internet or in other public forum: graphs on website<br><input type="checkbox"/> Official report available from network<br><input type="checkbox"/> Not available |
| Frequency                 | <input type="checkbox"/> $\geq$ 1 time/year –<br><input type="checkbox"/> < 1 time/year –                                                                                                                                                                                                           |
| Historical reference      | <input type="checkbox"/> over $\geq$ 5 years<br><input type="checkbox"/> between 1 and 5 years<br><input type="checkbox"/> no historical analysis                                                                                                                                                   |
| <b>COMMENT(S)</b>         |                                                                                                                                                                                                                                                                                                     |
| Monitoring public health. |                                                                                                                                                                                                                                                                                                     |

## GSEN-09-0004.00.2 HU – Animal Health and Welfare

| EuropaBio's coordinated approach to General Surveillance: Existing Networks |                                                                                                                                                                                                                                                                                                                                                                                                                     |                                                                                                                                                                                                                                                                                                                                                                                                                                                                                                                              |                                                                                                                                                                                                                                                                                              |
|-----------------------------------------------------------------------------|---------------------------------------------------------------------------------------------------------------------------------------------------------------------------------------------------------------------------------------------------------------------------------------------------------------------------------------------------------------------------------------------------------------------|------------------------------------------------------------------------------------------------------------------------------------------------------------------------------------------------------------------------------------------------------------------------------------------------------------------------------------------------------------------------------------------------------------------------------------------------------------------------------------------------------------------------------|----------------------------------------------------------------------------------------------------------------------------------------------------------------------------------------------------------------------------------------------------------------------------------------------|
| EuropaBio reference                                                         | GS-EN-09-0004                                                                                                                                                                                                                                                                                                                                                                                                       |                                                                                                                                                                                                                                                                                                                                                                                                                                                                                                                              |                                                                                                                                                                                                                                                                                              |
| Official name of the Network                                                | <b>Mezőgazdasági Szakigazgatási Hivatal (MgSZH)<br/>Állategészségügy és Állatvédelem</b>                                                                                                                                                                                                                                                                                                                            |                                                                                                                                                                                                                                                                                                                                                                                                                                                                                                                              |                                                                                                                                                                                                                                                                                              |
| Other names                                                                 | Ministry of Agriculture: Animal health and welfare                                                                                                                                                                                                                                                                                                                                                                  |                                                                                                                                                                                                                                                                                                                                                                                                                                                                                                                              |                                                                                                                                                                                                                                                                                              |
| Type of organisation                                                        | Governmental                                                                                                                                                                                                                                                                                                                                                                                                        |                                                                                                                                                                                                                                                                                                                                                                                                                                                                                                                              |                                                                                                                                                                                                                                                                                              |
| Coordinates                                                                 |                                                                                                                                                                                                                                                                                                                                                                                                                     |                                                                                                                                                                                                                                                                                                                                                                                                                                                                                                                              |                                                                                                                                                                                                                                                                                              |
| Website                                                                     | <a href="http://www.mgszh.gov.hu/">http://www.mgszh.gov.hu/</a><br><a href="http://www.kormany.hu/hu/hatterintezmenyek-bemutatasa/mezogazdasagi-szakigazgatasi-hivatal">http://www.kormany.hu/hu/hatterintezmenyek-bemutatasa/mezogazdasagi-szakigazgatasi-hivatal</a><br><a href="http://www.nebih.gov.hu/szakteruletek/szakteruletek/mgszh_aai">http://www.nebih.gov.hu/szakteruletek/szakteruletek/mgszh_aai</a> |                                                                                                                                                                                                                                                                                                                                                                                                                                                                                                                              |                                                                                                                                                                                                                                                                                              |
| Funding                                                                     | Public                                                                                                                                                                                                                                                                                                                                                                                                              |                                                                                                                                                                                                                                                                                                                                                                                                                                                                                                                              |                                                                                                                                                                                                                                                                                              |
| Conflict of interest                                                        | -                                                                                                                                                                                                                                                                                                                                                                                                                   |                                                                                                                                                                                                                                                                                                                                                                                                                                                                                                                              |                                                                                                                                                                                                                                                                                              |
| Part of other network(s)                                                    | -                                                                                                                                                                                                                                                                                                                                                                                                                   |                                                                                                                                                                                                                                                                                                                                                                                                                                                                                                                              |                                                                                                                                                                                                                                                                                              |
| Grouping other network(s)                                                   | Including regional offices                                                                                                                                                                                                                                                                                                                                                                                          |                                                                                                                                                                                                                                                                                                                                                                                                                                                                                                                              |                                                                                                                                                                                                                                                                                              |
| MONITORING SUBJECT                                                          |                                                                                                                                                                                                                                                                                                                                                                                                                     |                                                                                                                                                                                                                                                                                                                                                                                                                                                                                                                              |                                                                                                                                                                                                                                                                                              |
| Description                                                                 | Monitoring animal diseases, sanitary situation, import & export .                                                                                                                                                                                                                                                                                                                                                   |                                                                                                                                                                                                                                                                                                                                                                                                                                                                                                                              |                                                                                                                                                                                                                                                                                              |
| Protection goal(s) and/or influencing factor(s)                             | <input checked="" type="checkbox"/> Protection goal<br><input type="checkbox"/> Biodiversity: general<br><input type="checkbox"/> Human Health<br><input checked="" type="checkbox"/> Animal Health<br><input type="checkbox"/> Plant Health<br><input type="checkbox"/> Soil function<br><input type="checkbox"/> Water quality<br><input type="checkbox"/> Sustainable Agriculture                                | <input type="checkbox"/> Influencing factor<br><input type="checkbox"/> Agronomic practice<br><input type="checkbox"/> Plant protection<br><input type="checkbox"/> GMO cultivation<br><input type="checkbox"/> Environmental conditions                                                                                                                                                                                                                                                                                     |                                                                                                                                                                                                                                                                                              |
| Duplication of Farmer's questionnaire                                       | <input checked="" type="checkbox"/> No duplication<br><input type="checkbox"/> Partly duplication<br><input type="checkbox"/> Complete duplication                                                                                                                                                                                                                                                                  |                                                                                                                                                                                                                                                                                                                                                                                                                                                                                                                              |                                                                                                                                                                                                                                                                                              |
| SPECIFICITY                                                                 |                                                                                                                                                                                                                                                                                                                                                                                                                     |                                                                                                                                                                                                                                                                                                                                                                                                                                                                                                                              |                                                                                                                                                                                                                                                                                              |
| Geography                                                                   | <input type="checkbox"/> EU –wide<br><input type="checkbox"/> Zone A – North<br><input checked="" type="checkbox"/> Zone B – Centre:<br><input type="checkbox"/> Zone C – South                                                                                                                                                                                                                                     |                                                                                                                                                                                                                                                                                                                                                                                                                                                                                                                              |                                                                                                                                                                                                                                                                                              |
|                                                                             | <input type="checkbox"/> Denmark,<br><input type="checkbox"/> Estonia,<br><input type="checkbox"/> Latvia,<br><input type="checkbox"/> Lithuania,<br><input type="checkbox"/> Finland,<br><input type="checkbox"/> Sweden                                                                                                                                                                                           | <input type="checkbox"/> Belgium,<br><input type="checkbox"/> Czech Republic<br><input type="checkbox"/> Germany,<br><input type="checkbox"/> Ireland,<br><input type="checkbox"/> Luxembourg,<br><input checked="" type="checkbox"/> Hungary,<br><input type="checkbox"/> Netherlands,<br><input type="checkbox"/> Austria,<br><input type="checkbox"/> Poland,<br><input type="checkbox"/> Romania,<br><input type="checkbox"/> Slovenia,<br><input type="checkbox"/> Slovakia,<br><input type="checkbox"/> United Kingdom | <input type="checkbox"/> Bulgaria,<br><input type="checkbox"/> Greece,<br><input type="checkbox"/> Spain,<br><input type="checkbox"/> France,<br><input type="checkbox"/> Italy,<br><input type="checkbox"/> Cyprus,<br><input type="checkbox"/> Malta,<br><input type="checkbox"/> Portugal |
|                                                                             | <input type="checkbox"/> Regional (specify)<br><input type="checkbox"/> Local (specify)                                                                                                                                                                                                                                                                                                                             |                                                                                                                                                                                                                                                                                                                                                                                                                                                                                                                              |                                                                                                                                                                                                                                                                                              |
| Factors                                                                     | <input checked="" type="checkbox"/> Multiple species/items (specify): animal husbandry<br><input type="checkbox"/> Single species/item (specify)                                                                                                                                                                                                                                                                    |                                                                                                                                                                                                                                                                                                                                                                                                                                                                                                                              |                                                                                                                                                                                                                                                                                              |
| Crop                                                                        | <input checked="" type="checkbox"/> No specific crop(s)<br><input type="checkbox"/> Several crops (e.g. all cereals)<br><input type="checkbox"/> Single crop                                                                                                                                                                                                                                                        |                                                                                                                                                                                                                                                                                                                                                                                                                                                                                                                              |                                                                                                                                                                                                                                                                                              |
| Trait /treatment                                                            | <input checked="" type="checkbox"/> No specific traits/treatments<br><input type="checkbox"/> Several traits/treatments<br><input type="checkbox"/> Single trait/treatment                                                                                                                                                                                                                                          |                                                                                                                                                                                                                                                                                                                                                                                                                                                                                                                              |                                                                                                                                                                                                                                                                                              |
| GMO                                                                         | <input checked="" type="checkbox"/> No GMO bias<br><input type="checkbox"/> GMO specific                                                                                                                                                                                                                                                                                                                            |                                                                                                                                                                                                                                                                                                                                                                                                                                                                                                                              |                                                                                                                                                                                                                                                                                              |
| METHODOLOGY                                                                 |                                                                                                                                                                                                                                                                                                                                                                                                                     |                                                                                                                                                                                                                                                                                                                                                                                                                                                                                                                              |                                                                                                                                                                                                                                                                                              |
| Observations                                                                | <input type="checkbox"/> Reported, verifiable methodology<br><input type="checkbox"/> Reported, unverifiable methodology                                                                                                                                                                                                                                                                                            |                                                                                                                                                                                                                                                                                                                                                                                                                                                                                                                              |                                                                                                                                                                                                                                                                                              |

|                                                         |                                                                                                                                                                                                                                                                                                     |
|---------------------------------------------------------|-----------------------------------------------------------------------------------------------------------------------------------------------------------------------------------------------------------------------------------------------------------------------------------------------------|
|                                                         | <input checked="" type="checkbox"/> Unknown, unverifiable methodology                                                                                                                                                                                                                               |
| Frequency                                               | <input type="checkbox"/> > 1 time/year: birds<br><input type="checkbox"/> 1 time/year:<br><input type="checkbox"/> < 1 time/year                                                                                                                                                                    |
| Future                                                  | <input checked="" type="checkbox"/> For $\geq 5$ years<br><input type="checkbox"/> between 1 and 5 years<br><input type="checkbox"/> no prospect                                                                                                                                                    |
| Quality of performers                                   | <input checked="" type="checkbox"/> Trained, professionals<br><input type="checkbox"/> Trained, non-professionals – volunteers<br><input type="checkbox"/> Uncertain or not –specified                                                                                                              |
| Quality of data                                         | <input type="checkbox"/> Standard recording of raw data<br><input type="checkbox"/> Free recording of raw data<br><input type="checkbox"/> Anecdotic                                                                                                                                                |
| Analysis                                                | <input type="checkbox"/> Reported, verifiable methodology<br><input type="checkbox"/> Reported, unverifiable methodology<br><input checked="" type="checkbox"/> Unknown, unverifiable methodology                                                                                                   |
| Quality of analysis                                     | <input type="checkbox"/> Scientifically based<br><input type="checkbox"/> Indicative only<br><input checked="" type="checkbox"/> Unknown                                                                                                                                                            |
| <b>REPORTING</b>                                        |                                                                                                                                                                                                                                                                                                     |
| Language                                                | <input checked="" type="checkbox"/> Specify reporting language(s): Hungarian                                                                                                                                                                                                                        |
| Availability                                            | <input type="checkbox"/> Scientific publication<br><input type="checkbox"/> Official report (not yet) available on the internet or in other public forum: graphs on website<br><input type="checkbox"/> Official report available from network<br><input checked="" type="checkbox"/> Not available |
| Frequency                                               | <input type="checkbox"/> $\geq 1$ time/year –<br><input type="checkbox"/> < 1 time/year –                                                                                                                                                                                                           |
| Historical reference                                    | <input type="checkbox"/> over $\geq 5$ years<br><input type="checkbox"/> between 1 and 5 years<br><input checked="" type="checkbox"/> no historical analysis                                                                                                                                        |
| <b>COMMENT(S)</b>                                       |                                                                                                                                                                                                                                                                                                     |
| Activities related to commercialization and inspection. |                                                                                                                                                                                                                                                                                                     |

## GSEN-09-0005.00.2 HU – Rural Ag master

| EuropaBio's coordinated approach to General Surveillance: Existing Networks |                                                                                                                                                                                                                                                                                                                                                                                      |                                                                                                                                                                                                                                                                                                                                                                                                                                                                                                                              |                                                                                                                                                                                                                                                                                              |
|-----------------------------------------------------------------------------|--------------------------------------------------------------------------------------------------------------------------------------------------------------------------------------------------------------------------------------------------------------------------------------------------------------------------------------------------------------------------------------|------------------------------------------------------------------------------------------------------------------------------------------------------------------------------------------------------------------------------------------------------------------------------------------------------------------------------------------------------------------------------------------------------------------------------------------------------------------------------------------------------------------------------|----------------------------------------------------------------------------------------------------------------------------------------------------------------------------------------------------------------------------------------------------------------------------------------------|
| <b>ORGANISATION</b>                                                         |                                                                                                                                                                                                                                                                                                                                                                                      |                                                                                                                                                                                                                                                                                                                                                                                                                                                                                                                              |                                                                                                                                                                                                                                                                                              |
| EuropaBio reference                                                         | GS-EN-09-0005                                                                                                                                                                                                                                                                                                                                                                        |                                                                                                                                                                                                                                                                                                                                                                                                                                                                                                                              |                                                                                                                                                                                                                                                                                              |
| Official name of the Network                                                | Földművelésügyi és Vidékfejlesztési Minisztérium - Falugazdász hálózat                                                                                                                                                                                                                                                                                                               |                                                                                                                                                                                                                                                                                                                                                                                                                                                                                                                              |                                                                                                                                                                                                                                                                                              |
| Other names                                                                 | Ministry of Agriculture and Rural Development: Rural Ag Master Network                                                                                                                                                                                                                                                                                                               |                                                                                                                                                                                                                                                                                                                                                                                                                                                                                                                              |                                                                                                                                                                                                                                                                                              |
| Type of organisation                                                        | Governmental                                                                                                                                                                                                                                                                                                                                                                         |                                                                                                                                                                                                                                                                                                                                                                                                                                                                                                                              |                                                                                                                                                                                                                                                                                              |
| Coordinates                                                                 |                                                                                                                                                                                                                                                                                                                                                                                      |                                                                                                                                                                                                                                                                                                                                                                                                                                                                                                                              |                                                                                                                                                                                                                                                                                              |
| Website                                                                     | <a href="http://www.fvm.hu/main.php?folderID=2268">http://www.fvm.hu/main.php?folderID=2268</a><br><a href="http://www.kormany.hu/hu/videkfejlesztési-miniszterium/felelossegi-teruletek">http://www.kormany.hu/hu/videkfejlesztési-miniszterium/felelossegi-teruletek</a>                                                                                                           |                                                                                                                                                                                                                                                                                                                                                                                                                                                                                                                              |                                                                                                                                                                                                                                                                                              |
| Funding                                                                     | Public                                                                                                                                                                                                                                                                                                                                                                               |                                                                                                                                                                                                                                                                                                                                                                                                                                                                                                                              |                                                                                                                                                                                                                                                                                              |
| Conflict of interest                                                        | -                                                                                                                                                                                                                                                                                                                                                                                    |                                                                                                                                                                                                                                                                                                                                                                                                                                                                                                                              |                                                                                                                                                                                                                                                                                              |
| Part of other network(s)                                                    |                                                                                                                                                                                                                                                                                                                                                                                      |                                                                                                                                                                                                                                                                                                                                                                                                                                                                                                                              |                                                                                                                                                                                                                                                                                              |
| Grouping other network(s)                                                   | Including regional offices                                                                                                                                                                                                                                                                                                                                                           |                                                                                                                                                                                                                                                                                                                                                                                                                                                                                                                              |                                                                                                                                                                                                                                                                                              |
| <b>MONITORING SUBJECT</b>                                                   |                                                                                                                                                                                                                                                                                                                                                                                      |                                                                                                                                                                                                                                                                                                                                                                                                                                                                                                                              |                                                                                                                                                                                                                                                                                              |
| Description                                                                 | Monitoring practices and climatologic conditions.                                                                                                                                                                                                                                                                                                                                    |                                                                                                                                                                                                                                                                                                                                                                                                                                                                                                                              |                                                                                                                                                                                                                                                                                              |
| Protection goal(s) and/or influencing factor(s)                             | <input checked="" type="checkbox"/> Protection goal<br><input type="checkbox"/> Biodiversity: general<br><input type="checkbox"/> Human Health<br><input type="checkbox"/> Animal Health<br><input type="checkbox"/> Plant Health<br><input type="checkbox"/> Soil function<br><input type="checkbox"/> Water quality<br><input checked="" type="checkbox"/> Sustainable Agriculture | <input checked="" type="checkbox"/> Influencing factor<br><input checked="" type="checkbox"/> Agronomic practice<br><input type="checkbox"/> Plant protection<br><input type="checkbox"/> GMO cultivation<br><input checked="" type="checkbox"/> Environmental conditions                                                                                                                                                                                                                                                    |                                                                                                                                                                                                                                                                                              |
| Duplication of Farmer's questionnaire                                       | <input checked="" type="checkbox"/> No duplication<br><input type="checkbox"/> Partly duplication<br><input type="checkbox"/> Complete duplication                                                                                                                                                                                                                                   |                                                                                                                                                                                                                                                                                                                                                                                                                                                                                                                              |                                                                                                                                                                                                                                                                                              |
| <b>SPECIFICITY</b>                                                          |                                                                                                                                                                                                                                                                                                                                                                                      |                                                                                                                                                                                                                                                                                                                                                                                                                                                                                                                              |                                                                                                                                                                                                                                                                                              |
| Geography                                                                   | <input type="checkbox"/> EU –wide<br><input type="checkbox"/> Zone A – North<br><input checked="" type="checkbox"/> Zone B – Centre:<br><input type="checkbox"/> Zone C – South                                                                                                                                                                                                      |                                                                                                                                                                                                                                                                                                                                                                                                                                                                                                                              |                                                                                                                                                                                                                                                                                              |
|                                                                             | <input type="checkbox"/> Denmark,<br><input type="checkbox"/> Estonia,<br><input type="checkbox"/> Latvia,<br><input type="checkbox"/> Lithuania,<br><input type="checkbox"/> Finland,<br><input type="checkbox"/> Sweden                                                                                                                                                            | <input type="checkbox"/> Belgium,<br><input type="checkbox"/> Czech Republic<br><input type="checkbox"/> Germany,<br><input type="checkbox"/> Ireland,<br><input type="checkbox"/> Luxembourg,<br><input checked="" type="checkbox"/> Hungary,<br><input type="checkbox"/> Netherlands,<br><input type="checkbox"/> Austria,<br><input type="checkbox"/> Poland,<br><input type="checkbox"/> Romania,<br><input type="checkbox"/> Slovenia,<br><input type="checkbox"/> Slovakia,<br><input type="checkbox"/> United Kingdom | <input type="checkbox"/> Bulgaria,<br><input type="checkbox"/> Greece,<br><input type="checkbox"/> Spain,<br><input type="checkbox"/> France,<br><input type="checkbox"/> Italy,<br><input type="checkbox"/> Cyprus,<br><input type="checkbox"/> Malta,<br><input type="checkbox"/> Portugal |
|                                                                             | <input type="checkbox"/> Regional (specify)<br><input type="checkbox"/> Local (specify)                                                                                                                                                                                                                                                                                              |                                                                                                                                                                                                                                                                                                                                                                                                                                                                                                                              |                                                                                                                                                                                                                                                                                              |
| Factors                                                                     | <input checked="" type="checkbox"/> Multiple species/items (specify): crops, practices, meteorological data<br><input type="checkbox"/> Single species/item (specify)                                                                                                                                                                                                                |                                                                                                                                                                                                                                                                                                                                                                                                                                                                                                                              |                                                                                                                                                                                                                                                                                              |
| Crop                                                                        | <input checked="" type="checkbox"/> No specific crop(s)<br><input type="checkbox"/> Several crops (e.g. all cereals)<br><input type="checkbox"/> Single crop                                                                                                                                                                                                                         |                                                                                                                                                                                                                                                                                                                                                                                                                                                                                                                              |                                                                                                                                                                                                                                                                                              |
| Trait /treatment                                                            | <input checked="" type="checkbox"/> No specific traits/treatments<br><input type="checkbox"/> Several traits/treatments<br><input type="checkbox"/> Single trait/treatment                                                                                                                                                                                                           |                                                                                                                                                                                                                                                                                                                                                                                                                                                                                                                              |                                                                                                                                                                                                                                                                                              |
| GMO                                                                         | <input checked="" type="checkbox"/> No GMO bias<br><input type="checkbox"/> GMO specific                                                                                                                                                                                                                                                                                             |                                                                                                                                                                                                                                                                                                                                                                                                                                                                                                                              |                                                                                                                                                                                                                                                                                              |
| <b>METHODOLOGY</b>                                                          |                                                                                                                                                                                                                                                                                                                                                                                      |                                                                                                                                                                                                                                                                                                                                                                                                                                                                                                                              |                                                                                                                                                                                                                                                                                              |
| Observations                                                                | <input type="checkbox"/> Reported, verifiable methodology<br><input type="checkbox"/> Reported, unverifiable methodology<br><input checked="" type="checkbox"/> Unknown, unverifiable methodology                                                                                                                                                                                    |                                                                                                                                                                                                                                                                                                                                                                                                                                                                                                                              |                                                                                                                                                                                                                                                                                              |
| Frequency                                                                   | <input type="checkbox"/> > 1 time/year: birds                                                                                                                                                                                                                                                                                                                                        |                                                                                                                                                                                                                                                                                                                                                                                                                                                                                                                              |                                                                                                                                                                                                                                                                                              |



|                                                       |                                                                                                                                                                                                                                                                                                     |
|-------------------------------------------------------|-----------------------------------------------------------------------------------------------------------------------------------------------------------------------------------------------------------------------------------------------------------------------------------------------------|
|                                                       | <input checked="" type="checkbox"/> 1 time/year:<br><input type="checkbox"/> < 1 time/year                                                                                                                                                                                                          |
| Future                                                | <input checked="" type="checkbox"/> For $\geq 5$ years<br><input type="checkbox"/> between 1 and 5 years<br><input type="checkbox"/> no prospect                                                                                                                                                    |
| Quality of performers                                 | <input checked="" type="checkbox"/> Trained, professionals<br><input type="checkbox"/> Trained, non-professionals – volunteers<br><input type="checkbox"/> Uncertain or not –specified                                                                                                              |
| Quality of data                                       | <input checked="" type="checkbox"/> Standard recording of raw data<br><input type="checkbox"/> Free recording of raw data<br><input type="checkbox"/> Anecdotic                                                                                                                                     |
| Analysis                                              | <input type="checkbox"/> Reported, verifiable methodology<br><input type="checkbox"/> Reported, unverifiable methodology<br><input checked="" type="checkbox"/> Unknown, unverifiable methodology                                                                                                   |
| Quality of analysis                                   | <input type="checkbox"/> Scientifically based<br><input type="checkbox"/> Indicative only<br><input checked="" type="checkbox"/> Unknown                                                                                                                                                            |
| <b>REPORTING</b>                                      |                                                                                                                                                                                                                                                                                                     |
| Language                                              | <input checked="" type="checkbox"/> Specify reporting language(s): Hungarian                                                                                                                                                                                                                        |
| Availability                                          | <input type="checkbox"/> Scientific publication<br><input type="checkbox"/> Official report (not yet) available on the internet or in other public forum: graphs on website<br><input checked="" type="checkbox"/> Official report available from network<br><input type="checkbox"/> Not available |
| Frequency                                             | <input checked="" type="checkbox"/> $\geq 1$ time/year –<br><input type="checkbox"/> < 1 time/year –                                                                                                                                                                                                |
| Historical reference                                  | <input type="checkbox"/> over $\geq 5$ years<br><input checked="" type="checkbox"/> between 1 and 5 years<br><input type="checkbox"/> no historical analysis                                                                                                                                        |
| <b>COMMENT(S)</b>                                     |                                                                                                                                                                                                                                                                                                     |
| Activities performed by official services and experts |                                                                                                                                                                                                                                                                                                     |

## Netherlands

## GSEN-09-0025.00.2 NL – EIS

| EuropaBio's coordinated approach to General Surveillance: Existing Networks |                                                                                                                                                                                                                                                                                                                                                                                      |                                                                                                                                                                                                                                                                                                                                                                                                                                                                                                                              |                                                                                                                                                                                                                                                                                              |
|-----------------------------------------------------------------------------|--------------------------------------------------------------------------------------------------------------------------------------------------------------------------------------------------------------------------------------------------------------------------------------------------------------------------------------------------------------------------------------|------------------------------------------------------------------------------------------------------------------------------------------------------------------------------------------------------------------------------------------------------------------------------------------------------------------------------------------------------------------------------------------------------------------------------------------------------------------------------------------------------------------------------|----------------------------------------------------------------------------------------------------------------------------------------------------------------------------------------------------------------------------------------------------------------------------------------------|
| <b>ORGANISATION</b>                                                         |                                                                                                                                                                                                                                                                                                                                                                                      |                                                                                                                                                                                                                                                                                                                                                                                                                                                                                                                              |                                                                                                                                                                                                                                                                                              |
| EuropaBio reference                                                         | GS-EN-09-0025                                                                                                                                                                                                                                                                                                                                                                        |                                                                                                                                                                                                                                                                                                                                                                                                                                                                                                                              |                                                                                                                                                                                                                                                                                              |
| Official name of the Network                                                | EIS Stichting European Invertebrate Survey Nederland                                                                                                                                                                                                                                                                                                                                 |                                                                                                                                                                                                                                                                                                                                                                                                                                                                                                                              |                                                                                                                                                                                                                                                                                              |
| Other names                                                                 | EIS Foundation European Invertebrate Survey Netherlands                                                                                                                                                                                                                                                                                                                              |                                                                                                                                                                                                                                                                                                                                                                                                                                                                                                                              |                                                                                                                                                                                                                                                                                              |
| Type of organisation                                                        | Nature conservation<br>Founded 1976                                                                                                                                                                                                                                                                                                                                                  |                                                                                                                                                                                                                                                                                                                                                                                                                                                                                                                              |                                                                                                                                                                                                                                                                                              |
| Coordinates                                                                 | Postbus 9517<br>2300 RA Leiden                                                                                                                                                                                                                                                                                                                                                       |                                                                                                                                                                                                                                                                                                                                                                                                                                                                                                                              |                                                                                                                                                                                                                                                                                              |
| Website                                                                     | <a href="http://www.naturalis.nl/en/about-us/collaboration/networks/">http://www.naturalis.nl/en/about-us/collaboration/networks/</a>                                                                                                                                                                                                                                                |                                                                                                                                                                                                                                                                                                                                                                                                                                                                                                                              |                                                                                                                                                                                                                                                                                              |
| Funding                                                                     | Subsidies, projects                                                                                                                                                                                                                                                                                                                                                                  |                                                                                                                                                                                                                                                                                                                                                                                                                                                                                                                              |                                                                                                                                                                                                                                                                                              |
| Conflict of interest                                                        | -                                                                                                                                                                                                                                                                                                                                                                                    |                                                                                                                                                                                                                                                                                                                                                                                                                                                                                                                              |                                                                                                                                                                                                                                                                                              |
| Part of other network(s)                                                    | Collaboration with:<br>Stichting VeldOnderzoek Flora en Fauna (VOFF)<br>PSO (Platform Soortbeschermende Organisaties).and                                                                                                                                                                                                                                                            |                                                                                                                                                                                                                                                                                                                                                                                                                                                                                                                              |                                                                                                                                                                                                                                                                                              |
| Grouping other network(s)                                                   |                                                                                                                                                                                                                                                                                                                                                                                      |                                                                                                                                                                                                                                                                                                                                                                                                                                                                                                                              |                                                                                                                                                                                                                                                                                              |
| <b>MONITORING SUBJECT</b>                                                   |                                                                                                                                                                                                                                                                                                                                                                                      |                                                                                                                                                                                                                                                                                                                                                                                                                                                                                                                              |                                                                                                                                                                                                                                                                                              |
| Description                                                                 | Monitoring and collecting distribution data of invertebrates                                                                                                                                                                                                                                                                                                                         |                                                                                                                                                                                                                                                                                                                                                                                                                                                                                                                              |                                                                                                                                                                                                                                                                                              |
| Protection goal(s) and/or influencing factor(s)                             | <input checked="" type="checkbox"/> Protection goal<br><input checked="" type="checkbox"/> Biodiversity: insects<br><input type="checkbox"/> Human Health<br><input type="checkbox"/> Animal Health<br><input type="checkbox"/> Plant Health<br><input type="checkbox"/> Soil function<br><input type="checkbox"/> Water quality<br><input type="checkbox"/> Sustainable Agriculture | <input type="checkbox"/> Influencing factor<br><input type="checkbox"/> Agronomic practice<br><input type="checkbox"/> Plant protection<br><input type="checkbox"/> GMO cultivation<br><input type="checkbox"/> Environmental conditions                                                                                                                                                                                                                                                                                     |                                                                                                                                                                                                                                                                                              |
| Duplication of Farmer's questionnaire                                       | <input checked="" type="checkbox"/> No duplication<br><input type="checkbox"/> Partly duplication<br><input type="checkbox"/> Complete duplication                                                                                                                                                                                                                                   |                                                                                                                                                                                                                                                                                                                                                                                                                                                                                                                              |                                                                                                                                                                                                                                                                                              |
| <b>SPECIFICITY</b>                                                          |                                                                                                                                                                                                                                                                                                                                                                                      |                                                                                                                                                                                                                                                                                                                                                                                                                                                                                                                              |                                                                                                                                                                                                                                                                                              |
| Geography                                                                   | <input type="checkbox"/> EU -wide<br><input type="checkbox"/> Zone A – North<br><input checked="" type="checkbox"/> Zone B – Centre:<br><input type="checkbox"/> Zone C – South                                                                                                                                                                                                      |                                                                                                                                                                                                                                                                                                                                                                                                                                                                                                                              |                                                                                                                                                                                                                                                                                              |
|                                                                             | <input type="checkbox"/> Denmark,<br><input type="checkbox"/> Estonia,<br><input type="checkbox"/> Latvia,<br><input type="checkbox"/> Lithuania,<br><input type="checkbox"/> Finland,<br><input type="checkbox"/> Sweden                                                                                                                                                            | <input type="checkbox"/> Belgium,<br><input type="checkbox"/> Czech Republic<br><input type="checkbox"/> Germany,<br><input type="checkbox"/> Ireland,<br><input type="checkbox"/> Luxembourg,<br><input type="checkbox"/> Hungary,<br><input checked="" type="checkbox"/> Netherlands,<br><input type="checkbox"/> Austria,<br><input type="checkbox"/> Poland,<br><input type="checkbox"/> Romania,<br><input type="checkbox"/> Slovenia,<br><input type="checkbox"/> Slovakia,<br><input type="checkbox"/> United Kingdom | <input type="checkbox"/> Bulgaria,<br><input type="checkbox"/> Greece,<br><input type="checkbox"/> Spain,<br><input type="checkbox"/> France,<br><input type="checkbox"/> Italy,<br><input type="checkbox"/> Cyprus,<br><input type="checkbox"/> Malta,<br><input type="checkbox"/> Portugal |
|                                                                             | <input type="checkbox"/> Regional (specify)<br><input type="checkbox"/> Local (specify)                                                                                                                                                                                                                                                                                              |                                                                                                                                                                                                                                                                                                                                                                                                                                                                                                                              |                                                                                                                                                                                                                                                                                              |
| Factors                                                                     | <input checked="" type="checkbox"/> Multiple species/items (specify): insects<br><input type="checkbox"/> Single species/item (specify)                                                                                                                                                                                                                                              |                                                                                                                                                                                                                                                                                                                                                                                                                                                                                                                              |                                                                                                                                                                                                                                                                                              |
| Crop                                                                        | <input checked="" type="checkbox"/> No specific crop(s)<br><input type="checkbox"/> Several crops (e.g. all cereals)<br><input type="checkbox"/> Single crop                                                                                                                                                                                                                         |                                                                                                                                                                                                                                                                                                                                                                                                                                                                                                                              |                                                                                                                                                                                                                                                                                              |
| Trait /treatment                                                            | <input checked="" type="checkbox"/> No specific traits/treatments<br><input type="checkbox"/> Several traits/treatments<br><input type="checkbox"/> Single trait/treatment                                                                                                                                                                                                           |                                                                                                                                                                                                                                                                                                                                                                                                                                                                                                                              |                                                                                                                                                                                                                                                                                              |
| GMO                                                                         | <input checked="" type="checkbox"/> No GMO bias<br><input type="checkbox"/> GMO specific                                                                                                                                                                                                                                                                                             |                                                                                                                                                                                                                                                                                                                                                                                                                                                                                                                              |                                                                                                                                                                                                                                                                                              |
| <b>METHODOLOGY</b>                                                          |                                                                                                                                                                                                                                                                                                                                                                                      |                                                                                                                                                                                                                                                                                                                                                                                                                                                                                                                              |                                                                                                                                                                                                                                                                                              |
| Observations                                                                | <input checked="" type="checkbox"/> Reported, verifiable methodology<br><input type="checkbox"/> Reported, unverifiable methodology                                                                                                                                                                                                                                                  |                                                                                                                                                                                                                                                                                                                                                                                                                                                                                                                              |                                                                                                                                                                                                                                                                                              |

|                                                                                                                                                                              |                                                                                                                                                                                                                                                                        |
|------------------------------------------------------------------------------------------------------------------------------------------------------------------------------|------------------------------------------------------------------------------------------------------------------------------------------------------------------------------------------------------------------------------------------------------------------------|
|                                                                                                                                                                              | <input type="checkbox"/> Unknown, unverifiable methodology                                                                                                                                                                                                             |
| Frequency                                                                                                                                                                    | <input checked="" type="checkbox"/> > 1 time/year<br><input type="checkbox"/> 1 time/year<br><input type="checkbox"/> < 1 time/year                                                                                                                                    |
| Future                                                                                                                                                                       | <input checked="" type="checkbox"/> For ≥ 5 years<br><input type="checkbox"/> between 1 and 5 years<br><input type="checkbox"/> no prospect                                                                                                                            |
| Quality of performers                                                                                                                                                        | <input type="checkbox"/> Trained, professionals<br><input checked="" type="checkbox"/> Trained, non-professionals – training by documentation, volunteers<br><input type="checkbox"/> Uncertain or not -specified                                                      |
| Quality of data                                                                                                                                                              | <input checked="" type="checkbox"/> Standard recording of raw data<br><input type="checkbox"/> Free recording of raw data<br><input type="checkbox"/> Anecdotic                                                                                                        |
| Analysis                                                                                                                                                                     | <input checked="" type="checkbox"/> Reported, verifiable methodology<br><input type="checkbox"/> Reported, unverifiable methodology<br><input type="checkbox"/> Unknown, unverifiable methodology                                                                      |
| Quality of analysis                                                                                                                                                          | <input checked="" type="checkbox"/> Scientifically based<br><input type="checkbox"/> Indicative only<br><input type="checkbox"/> Unknown                                                                                                                               |
| <b>REPORTING</b>                                                                                                                                                             |                                                                                                                                                                                                                                                                        |
| Language                                                                                                                                                                     | Reporting language(s): Dutch                                                                                                                                                                                                                                           |
| Availability                                                                                                                                                                 | <input type="checkbox"/> Scientific publication<br><input checked="" type="checkbox"/> Official report available on the internet or in other public forum<br><input type="checkbox"/> Official report available from network<br><input type="checkbox"/> Not available |
| Frequency                                                                                                                                                                    | <input checked="" type="checkbox"/> ≥ 1 time/year – Yearly reports since 1997<br><input type="checkbox"/> < 1 time/year – Reports per species or on local findings; distribution maps                                                                                  |
| Historical reference                                                                                                                                                         | <input checked="" type="checkbox"/> over ≥ 5 years<br><input type="checkbox"/> between 1 and 5 years<br><input type="checkbox"/> no historical analysis                                                                                                                |
| <b>COMMENT(S)</b>                                                                                                                                                            |                                                                                                                                                                                                                                                                        |
| Focus on conservation targets for invertebrates. Several publications, some in EIS managed journal only accessible by subscription. Other summary documents provided freely. |                                                                                                                                                                                                                                                                        |

## GSEN-09-0026.00.2 NL – RIKILT

| EuropaBio's coordinated approach to General Surveillance: Existing Networks |                                                                                                                                                                                                                                                                                                                                                                                                                                                                                                                                                                                      |                                                                                                                                                                                                                                                                                                                                         |  |
|-----------------------------------------------------------------------------|--------------------------------------------------------------------------------------------------------------------------------------------------------------------------------------------------------------------------------------------------------------------------------------------------------------------------------------------------------------------------------------------------------------------------------------------------------------------------------------------------------------------------------------------------------------------------------------|-----------------------------------------------------------------------------------------------------------------------------------------------------------------------------------------------------------------------------------------------------------------------------------------------------------------------------------------|--|
| <b>ORGANISATION</b>                                                         |                                                                                                                                                                                                                                                                                                                                                                                                                                                                                                                                                                                      |                                                                                                                                                                                                                                                                                                                                         |  |
| EuropaBio reference                                                         | GS-EN-09-0026                                                                                                                                                                                                                                                                                                                                                                                                                                                                                                                                                                        |                                                                                                                                                                                                                                                                                                                                         |  |
| Official name of the Network                                                | Wageningen Universiteit en Researchcentrum<br>Instituut voor Voedselveiligheid                                                                                                                                                                                                                                                                                                                                                                                                                                                                                                       |                                                                                                                                                                                                                                                                                                                                         |  |
| Other names                                                                 | RIKILT<br>Institute for Food Safety                                                                                                                                                                                                                                                                                                                                                                                                                                                                                                                                                  |                                                                                                                                                                                                                                                                                                                                         |  |
| Type of organisation                                                        | Academic<br>Founded 1876                                                                                                                                                                                                                                                                                                                                                                                                                                                                                                                                                             |                                                                                                                                                                                                                                                                                                                                         |  |
| Coordinates                                                                 | Akkermaalsbos 2,<br>6708 WB, Wageningen<br><br>Fax: 0317 417717<br>Email: info.rikilt[at]wur.nl                                                                                                                                                                                                                                                                                                                                                                                                                                                                                      |                                                                                                                                                                                                                                                                                                                                         |  |
| Website                                                                     | <a href="http://www.rikilt.wur.nl/UK/">http://www.rikilt.wur.nl/UK/</a>                                                                                                                                                                                                                                                                                                                                                                                                                                                                                                              |                                                                                                                                                                                                                                                                                                                                         |  |
| Funding                                                                     | Government funding, subsidies, projects, tuition fees                                                                                                                                                                                                                                                                                                                                                                                                                                                                                                                                |                                                                                                                                                                                                                                                                                                                                         |  |
| Conflict of interest                                                        | -                                                                                                                                                                                                                                                                                                                                                                                                                                                                                                                                                                                    |                                                                                                                                                                                                                                                                                                                                         |  |
| Part of other network(s)                                                    |                                                                                                                                                                                                                                                                                                                                                                                                                                                                                                                                                                                      |                                                                                                                                                                                                                                                                                                                                         |  |
| Grouping other network(s)                                                   |                                                                                                                                                                                                                                                                                                                                                                                                                                                                                                                                                                                      |                                                                                                                                                                                                                                                                                                                                         |  |
| <b>MONITORING SUBJECT</b>                                                   |                                                                                                                                                                                                                                                                                                                                                                                                                                                                                                                                                                                      |                                                                                                                                                                                                                                                                                                                                         |  |
| Description                                                                 | Monitoring on request of the Ministry of Agriculture, Nature and Food Safety of food safety, animal health and biodiversity.                                                                                                                                                                                                                                                                                                                                                                                                                                                         |                                                                                                                                                                                                                                                                                                                                         |  |
| Protection goal(s) and/or influencing factor(s)                             | <input checked="" type="checkbox"/> Protection goal<br><br><input checked="" type="checkbox"/> Biodiversity<br><input checked="" type="checkbox"/> Human Health<br><input checked="" type="checkbox"/> Animal Health<br><input type="checkbox"/> Plant Health<br><input type="checkbox"/> Soil function<br><input type="checkbox"/> Water quality<br><input type="checkbox"/> Sustainable Agriculture                                                                                                                                                                                | <input type="checkbox"/> Influencing factor<br><br><input type="checkbox"/> Agronomic practice<br><input type="checkbox"/> Plant protection<br><input type="checkbox"/> GMO cultivation<br><input type="checkbox"/> Environmental conditions                                                                                            |  |
| Duplication of Farmer's questionnaire                                       | <input checked="" type="checkbox"/> No duplication<br><input type="checkbox"/> Partly duplication<br><input type="checkbox"/> Complete duplication                                                                                                                                                                                                                                                                                                                                                                                                                                   |                                                                                                                                                                                                                                                                                                                                         |  |
| <b>SPECIFICITY</b>                                                          |                                                                                                                                                                                                                                                                                                                                                                                                                                                                                                                                                                                      |                                                                                                                                                                                                                                                                                                                                         |  |
| Geography                                                                   | <input type="checkbox"/> EU -wide<br><br><input type="checkbox"/> Zone A – North<br><input type="checkbox"/> Denmark,<br><input type="checkbox"/> Estonia,<br><input type="checkbox"/> Latvia,<br><input type="checkbox"/> Lithuania,<br><input type="checkbox"/> Finland,<br><input type="checkbox"/> Sweden                                                                                                                                                                                                                                                                        |                                                                                                                                                                                                                                                                                                                                         |  |
|                                                                             | <input checked="" type="checkbox"/> Zone B – Centre:<br><input type="checkbox"/> Belgium,<br><input type="checkbox"/> Czech Republic<br><input type="checkbox"/> Germany,<br><input type="checkbox"/> Ireland,<br><input type="checkbox"/> Luxembourg,<br><input type="checkbox"/> Hungary,<br><input checked="" type="checkbox"/> Netherlands,<br><input type="checkbox"/> Austria,<br><input type="checkbox"/> Poland,<br><input type="checkbox"/> Romania,<br><input type="checkbox"/> Slovenia,<br><input type="checkbox"/> Slovakia,<br><input type="checkbox"/> United Kingdom | <input type="checkbox"/> Zone C – South<br><input type="checkbox"/> Bulgaria,<br><input type="checkbox"/> Greece,<br><input type="checkbox"/> Spain,<br><input type="checkbox"/> France,<br><input type="checkbox"/> Italy,<br><input type="checkbox"/> Cyprus,<br><input type="checkbox"/> Malta,<br><input type="checkbox"/> Portugal |  |
|                                                                             | <input type="checkbox"/> Regional (specify)<br><input type="checkbox"/> Local (specify)                                                                                                                                                                                                                                                                                                                                                                                                                                                                                              |                                                                                                                                                                                                                                                                                                                                         |  |
| Factors                                                                     | <input checked="" type="checkbox"/> Multiple species/items (specify): food and feed safety, risk assessments<br><input type="checkbox"/> Single species/item (specify)                                                                                                                                                                                                                                                                                                                                                                                                               |                                                                                                                                                                                                                                                                                                                                         |  |
| Crop                                                                        | <input checked="" type="checkbox"/> No specific crop(s)<br><input type="checkbox"/> Several crops (e.g. all cereals)<br><input type="checkbox"/> Single crop                                                                                                                                                                                                                                                                                                                                                                                                                         |                                                                                                                                                                                                                                                                                                                                         |  |
| Trait /treatment                                                            | <input checked="" type="checkbox"/> No specific traits/treatments<br><input type="checkbox"/> Several traits/treatments<br><input type="checkbox"/> Single trait/treatment                                                                                                                                                                                                                                                                                                                                                                                                           |                                                                                                                                                                                                                                                                                                                                         |  |
| GMO                                                                         | <input checked="" type="checkbox"/> No GMO bias<br><input type="checkbox"/> GMO specific                                                                                                                                                                                                                                                                                                                                                                                                                                                                                             |                                                                                                                                                                                                                                                                                                                                         |  |

| <b>METHODOLOGY</b>                                                      |                                                                                                                                                                                                                                                                                   |
|-------------------------------------------------------------------------|-----------------------------------------------------------------------------------------------------------------------------------------------------------------------------------------------------------------------------------------------------------------------------------|
| Observations                                                            | <input checked="" type="checkbox"/> Reported, verifiable methodology<br><input type="checkbox"/> Reported, unverifiable methodology<br><input type="checkbox"/> Unknown, unverifiable methodology                                                                                 |
| Frequency                                                               | <input checked="" type="checkbox"/> > 1 time/year<br><input type="checkbox"/> 1 time/year<br><input type="checkbox"/> < 1 time/year                                                                                                                                               |
| Future                                                                  | <input checked="" type="checkbox"/> For $\geq 5$ years<br><input type="checkbox"/> between 1 and 5 years<br><input type="checkbox"/> no prospect                                                                                                                                  |
| Quality of performers                                                   | <input checked="" type="checkbox"/> Trained, professionals<br><input type="checkbox"/> Trained, non-professionals – training by documentation, volunteers<br><input type="checkbox"/> Uncertain or not -specified                                                                 |
| Quality of data                                                         | <input checked="" type="checkbox"/> Standard recording of raw data<br><input type="checkbox"/> Free recording of raw data<br><input type="checkbox"/> Anecdotic                                                                                                                   |
| Analysis                                                                | <input checked="" type="checkbox"/> Reported, verifiable methodology<br><input type="checkbox"/> Reported, unverifiable methodology<br><input type="checkbox"/> Unknown, unverifiable methodology                                                                                 |
| Quality of analysis                                                     | <input checked="" type="checkbox"/> Scientifically based<br><input type="checkbox"/> Indicative only<br><input type="checkbox"/> Unknown                                                                                                                                          |
| <b>REPORTING</b>                                                        |                                                                                                                                                                                                                                                                                   |
| Language                                                                | Reporting language(s): Dutch/English                                                                                                                                                                                                                                              |
| Availability                                                            | <input checked="" type="checkbox"/> Scientific publication<br><input checked="" type="checkbox"/> Official report available on the internet or in other public forum<br><input type="checkbox"/> Official report available from network<br><input type="checkbox"/> Not available |
| Frequency                                                               | <input checked="" type="checkbox"/> $\geq 1$ time/year –<br><input type="checkbox"/> < 1 time/year –                                                                                                                                                                              |
| Historical reference                                                    | <input checked="" type="checkbox"/> over $\geq 5$ years<br><input type="checkbox"/> between 1 and 5 years<br><input type="checkbox"/> no historical analysis                                                                                                                      |
| <b>COMMENT(S)</b>                                                       |                                                                                                                                                                                                                                                                                   |
| Non-monitoring specific scientific publications and government reports. |                                                                                                                                                                                                                                                                                   |

**GSEN-09-0027.00.2 NL – PRI**

| <b>EuropaBio's coordinated approach to General Surveillance: Existing Networks</b> |                                                                                                                                                                                                                                                                                                                                                                                                                                                                                                                                                                                      |                                                                                                                                                                                                                                                                                                                                         |  |
|------------------------------------------------------------------------------------|--------------------------------------------------------------------------------------------------------------------------------------------------------------------------------------------------------------------------------------------------------------------------------------------------------------------------------------------------------------------------------------------------------------------------------------------------------------------------------------------------------------------------------------------------------------------------------------|-----------------------------------------------------------------------------------------------------------------------------------------------------------------------------------------------------------------------------------------------------------------------------------------------------------------------------------------|--|
| <b>ORGANISATION</b>                                                                |                                                                                                                                                                                                                                                                                                                                                                                                                                                                                                                                                                                      |                                                                                                                                                                                                                                                                                                                                         |  |
| EuropaBio reference                                                                | GS-EN-09-0027                                                                                                                                                                                                                                                                                                                                                                                                                                                                                                                                                                        |                                                                                                                                                                                                                                                                                                                                         |  |
| Official name of the Network                                                       | <b>Wageningen Universiteit en Researchcentrum<br/>Plant Research International</b>                                                                                                                                                                                                                                                                                                                                                                                                                                                                                                   |                                                                                                                                                                                                                                                                                                                                         |  |
| Other names                                                                        | PRI                                                                                                                                                                                                                                                                                                                                                                                                                                                                                                                                                                                  |                                                                                                                                                                                                                                                                                                                                         |  |
| Type of organisation                                                               | Academic<br>Founded 1876                                                                                                                                                                                                                                                                                                                                                                                                                                                                                                                                                             |                                                                                                                                                                                                                                                                                                                                         |  |
| Coordinates                                                                        | Postbus 16,<br>6700 AA Wageningen<br><br>gebouw 107,<br>Droevendaalsesteeg 1,<br>6708 PB Wageningen<br>fax: 31 (0)317 481282<br>Email: bijen[at]wur.nl<br><br>PRI<br>Gebouw: 107 (Radix)<br>Droevendaalsesteeg 1<br>6708 PB Wageningen<br>fax:31 (0)317 418094<br>Email: info.plant[at]wur.nl                                                                                                                                                                                                                                                                                        |                                                                                                                                                                                                                                                                                                                                         |  |
| Website                                                                            | <a href="http://www.bijen.wur.nl">www.bijen.wur.nl</a><br>( <a href="http://www.pri.wur.nl/UK/">http://www.pri.wur.nl/UK/</a> )<br><a href="http://www.bijen.wur.nl/NL/">http://www.bijen.wur.nl/NL/</a><br><a href="http://www.bijen.wur.nl/UK/">http://www.bijen.wur.nl/UK/</a>                                                                                                                                                                                                                                                                                                    |                                                                                                                                                                                                                                                                                                                                         |  |
| Funding                                                                            | Government funding, subsidies, projects, tuition fees                                                                                                                                                                                                                                                                                                                                                                                                                                                                                                                                |                                                                                                                                                                                                                                                                                                                                         |  |
| Conflict of interest                                                               | -                                                                                                                                                                                                                                                                                                                                                                                                                                                                                                                                                                                    |                                                                                                                                                                                                                                                                                                                                         |  |
| Part of other network(s)                                                           |                                                                                                                                                                                                                                                                                                                                                                                                                                                                                                                                                                                      |                                                                                                                                                                                                                                                                                                                                         |  |
| Grouping other network(s)                                                          |                                                                                                                                                                                                                                                                                                                                                                                                                                                                                                                                                                                      |                                                                                                                                                                                                                                                                                                                                         |  |
| <b>MONITORING SUBJECT</b>                                                          |                                                                                                                                                                                                                                                                                                                                                                                                                                                                                                                                                                                      |                                                                                                                                                                                                                                                                                                                                         |  |
| Description                                                                        | Research for the agro-production chain with scientific products, from the DNA level to production system concepts.<br>Some information on bees and sustainable agriculture                                                                                                                                                                                                                                                                                                                                                                                                           |                                                                                                                                                                                                                                                                                                                                         |  |
| Protection goal(s) and/or influencing factor(s)                                    | <input checked="" type="checkbox"/> Protection goal<br><br><input checked="" type="checkbox"/> Biodiversity: Insects<br><input type="checkbox"/> Human Health<br><input type="checkbox"/> Animal Health<br><input type="checkbox"/> Plant Health<br><input type="checkbox"/> Soil function<br><input type="checkbox"/> Water quality<br><input checked="" type="checkbox"/> Sustainable Agriculture                                                                                                                                                                                  | <input checked="" type="checkbox"/> Influencing factor<br><br><input checked="" type="checkbox"/> Agronomic practice<br><input type="checkbox"/> Plant protection<br><input type="checkbox"/> GMO cultivation<br><input type="checkbox"/> Environmental conditions                                                                      |  |
| Duplication of Farmer's questionnaire                                              | <input checked="" type="checkbox"/> No duplication<br><input type="checkbox"/> Partly duplication<br><input type="checkbox"/> Complete duplication                                                                                                                                                                                                                                                                                                                                                                                                                                   |                                                                                                                                                                                                                                                                                                                                         |  |
| <b>SPECIFICITY</b>                                                                 |                                                                                                                                                                                                                                                                                                                                                                                                                                                                                                                                                                                      |                                                                                                                                                                                                                                                                                                                                         |  |
| Geography                                                                          | <input type="checkbox"/> EU -wide<br><br><input type="checkbox"/> Zone A – North<br><input type="checkbox"/> Denmark,<br><input type="checkbox"/> Estonia,<br><input type="checkbox"/> Latvia,<br><input type="checkbox"/> Lithuania,<br><input type="checkbox"/> Finland,<br><input type="checkbox"/> Sweden                                                                                                                                                                                                                                                                        |                                                                                                                                                                                                                                                                                                                                         |  |
|                                                                                    | <input checked="" type="checkbox"/> Zone B – Centre:<br><input type="checkbox"/> Belgium,<br><input type="checkbox"/> Czech Republic<br><input type="checkbox"/> Germany,<br><input type="checkbox"/> Ireland,<br><input type="checkbox"/> Luxembourg,<br><input type="checkbox"/> Hungary,<br><input checked="" type="checkbox"/> Netherlands,<br><input type="checkbox"/> Austria,<br><input type="checkbox"/> Poland,<br><input type="checkbox"/> Romania,<br><input type="checkbox"/> Slovenia,<br><input type="checkbox"/> Slovakia,<br><input type="checkbox"/> United Kingdom | <input type="checkbox"/> Zone C – South<br><input type="checkbox"/> Bulgaria,<br><input type="checkbox"/> Greece,<br><input type="checkbox"/> Spain,<br><input type="checkbox"/> France,<br><input type="checkbox"/> Italy,<br><input type="checkbox"/> Cyprus,<br><input type="checkbox"/> Malta,<br><input type="checkbox"/> Portugal |  |
|                                                                                    | <input type="checkbox"/> Regional (specify)                                                                                                                                                                                                                                                                                                                                                                                                                                                                                                                                          |                                                                                                                                                                                                                                                                                                                                         |  |

|                                                                                                             |                                                                                                                                                                                                                                                                                   |
|-------------------------------------------------------------------------------------------------------------|-----------------------------------------------------------------------------------------------------------------------------------------------------------------------------------------------------------------------------------------------------------------------------------|
|                                                                                                             | <input type="checkbox"/> Local (specify)                                                                                                                                                                                                                                          |
| Factors                                                                                                     | <input checked="" type="checkbox"/> Multiple species/items (specify): bees, sustainable agriculture<br><input type="checkbox"/> Single species/item (specify)                                                                                                                     |
| Crop                                                                                                        | <input checked="" type="checkbox"/> No specific crop(s)<br><input type="checkbox"/> Several crops (e.g. all cereals)<br><input type="checkbox"/> Single crop                                                                                                                      |
| Trait /treatment                                                                                            | <input checked="" type="checkbox"/> No specific traits/treatments<br><input type="checkbox"/> Several traits/treatments<br><input type="checkbox"/> Single trait/treatment                                                                                                        |
| GMO                                                                                                         | <input checked="" type="checkbox"/> No GMO bias<br><input type="checkbox"/> GMO specific                                                                                                                                                                                          |
| <b>METHODOLOGY</b>                                                                                          |                                                                                                                                                                                                                                                                                   |
| Observations                                                                                                | <input checked="" type="checkbox"/> Reported, verifiable methodology<br><input type="checkbox"/> Reported, unverifiable methodology<br><input type="checkbox"/> Unknown, unverifiable methodology                                                                                 |
| Frequency                                                                                                   | <input checked="" type="checkbox"/> > 1 time/year<br><input type="checkbox"/> 1 time/year<br><input type="checkbox"/> < 1 time/year                                                                                                                                               |
| Future                                                                                                      | <input checked="" type="checkbox"/> For ≥ 5 years<br><input type="checkbox"/> between 1 and 5 years<br><input type="checkbox"/> no prospect                                                                                                                                       |
| Quality of performers                                                                                       | <input checked="" type="checkbox"/> Trained, professionals<br><input type="checkbox"/> Trained, non-professionals – training by documentation, volunteers<br><input type="checkbox"/> Uncertain or not -specified                                                                 |
| Quality of data                                                                                             | <input checked="" type="checkbox"/> Standard recording of raw data<br><input type="checkbox"/> Free recording of raw data<br><input type="checkbox"/> Anecdotic                                                                                                                   |
| Analysis                                                                                                    | <input checked="" type="checkbox"/> Reported, verifiable methodology<br><input type="checkbox"/> Reported, unverifiable methodology<br><input type="checkbox"/> Unknown, unverifiable methodology                                                                                 |
| Quality of analysis                                                                                         | <input checked="" type="checkbox"/> Scientifically based<br><input type="checkbox"/> Indicative only<br><input type="checkbox"/> Unknown                                                                                                                                          |
| <b>REPORTING</b>                                                                                            |                                                                                                                                                                                                                                                                                   |
| Language                                                                                                    | Reporting language(s): Dutch/English                                                                                                                                                                                                                                              |
| Availability                                                                                                | <input checked="" type="checkbox"/> Scientific publication<br><input checked="" type="checkbox"/> Official report available on the internet or in other public forum<br><input type="checkbox"/> Official report available from network<br><input type="checkbox"/> Not available |
| Frequency                                                                                                   | <input checked="" type="checkbox"/> ≥ 1 time/year – Yearly reports on agronomic practices<br><input type="checkbox"/> < 1 time/year – Specific publications                                                                                                                       |
| Historical reference                                                                                        | <input checked="" type="checkbox"/> over ≥ 5 years<br><input type="checkbox"/> between 1 and 5 years<br><input type="checkbox"/> no historical analysis                                                                                                                           |
| <b>COMMENT(S)</b>                                                                                           |                                                                                                                                                                                                                                                                                   |
| Some reports are only available upon payment, free newsletter for beekeepers and people interested in bees. |                                                                                                                                                                                                                                                                                   |



**GSEN-09-0028.00.2 NL – NEV**

| <b>EuropaBio's coordinated approach to General Surveillance: Existing Networks</b> |                                                                                                                                                                                                                                                                                                                                                                                      |                                                                                                                                                                                                                                                                                                                                                                                                                                                                                                                              |                                                                                                                                                                                                                                                                                              |
|------------------------------------------------------------------------------------|--------------------------------------------------------------------------------------------------------------------------------------------------------------------------------------------------------------------------------------------------------------------------------------------------------------------------------------------------------------------------------------|------------------------------------------------------------------------------------------------------------------------------------------------------------------------------------------------------------------------------------------------------------------------------------------------------------------------------------------------------------------------------------------------------------------------------------------------------------------------------------------------------------------------------|----------------------------------------------------------------------------------------------------------------------------------------------------------------------------------------------------------------------------------------------------------------------------------------------|
| <b>ORGANISATION</b>                                                                |                                                                                                                                                                                                                                                                                                                                                                                      |                                                                                                                                                                                                                                                                                                                                                                                                                                                                                                                              |                                                                                                                                                                                                                                                                                              |
| EuropaBio reference                                                                | GS-EN-09-0028                                                                                                                                                                                                                                                                                                                                                                        |                                                                                                                                                                                                                                                                                                                                                                                                                                                                                                                              |                                                                                                                                                                                                                                                                                              |
| Official name of the Network                                                       | <b>Nederlandse Entomologische Vereniging</b>                                                                                                                                                                                                                                                                                                                                         |                                                                                                                                                                                                                                                                                                                                                                                                                                                                                                                              |                                                                                                                                                                                                                                                                                              |
| Other names                                                                        | Netherlands Entomological Society                                                                                                                                                                                                                                                                                                                                                    |                                                                                                                                                                                                                                                                                                                                                                                                                                                                                                                              |                                                                                                                                                                                                                                                                                              |
| Type of organisation                                                               | Nature conservation<br>Founded 1845                                                                                                                                                                                                                                                                                                                                                  |                                                                                                                                                                                                                                                                                                                                                                                                                                                                                                                              |                                                                                                                                                                                                                                                                                              |
| Coordinates                                                                        | Plantage Middenlaan 64<br>1018 DH Amsterdam                                                                                                                                                                                                                                                                                                                                          |                                                                                                                                                                                                                                                                                                                                                                                                                                                                                                                              |                                                                                                                                                                                                                                                                                              |
| Website                                                                            | <a href="http://www.nev.nl">www.nev.nl</a>                                                                                                                                                                                                                                                                                                                                           |                                                                                                                                                                                                                                                                                                                                                                                                                                                                                                                              |                                                                                                                                                                                                                                                                                              |
| Funding                                                                            | Subsidies, projects, membership fees                                                                                                                                                                                                                                                                                                                                                 |                                                                                                                                                                                                                                                                                                                                                                                                                                                                                                                              |                                                                                                                                                                                                                                                                                              |
| Conflict of interest                                                               | -                                                                                                                                                                                                                                                                                                                                                                                    |                                                                                                                                                                                                                                                                                                                                                                                                                                                                                                                              |                                                                                                                                                                                                                                                                                              |
| Part of other network(s)                                                           | Collaboration with<br>EIS-Nederland (GS-EN-0025)<br>Naturalis                                                                                                                                                                                                                                                                                                                        |                                                                                                                                                                                                                                                                                                                                                                                                                                                                                                                              |                                                                                                                                                                                                                                                                                              |
| Grouping other network(s)                                                          | 5 regional divisions, 8 sections                                                                                                                                                                                                                                                                                                                                                     |                                                                                                                                                                                                                                                                                                                                                                                                                                                                                                                              |                                                                                                                                                                                                                                                                                              |
| <b>MONITORING SUBJECT</b>                                                          |                                                                                                                                                                                                                                                                                                                                                                                      |                                                                                                                                                                                                                                                                                                                                                                                                                                                                                                                              |                                                                                                                                                                                                                                                                                              |
| Description                                                                        | improving and promoting entomology in the Netherlands                                                                                                                                                                                                                                                                                                                                |                                                                                                                                                                                                                                                                                                                                                                                                                                                                                                                              |                                                                                                                                                                                                                                                                                              |
| Protection goal(s) and/or influencing factor(s)                                    | <input checked="" type="checkbox"/> Protection goal<br><input checked="" type="checkbox"/> Biodiversity: insects<br><input type="checkbox"/> Human Health<br><input type="checkbox"/> Animal Health<br><input type="checkbox"/> Plant Health<br><input type="checkbox"/> Soil function<br><input type="checkbox"/> Water quality<br><input type="checkbox"/> Sustainable Agriculture | <input type="checkbox"/> Influencing factor<br><input type="checkbox"/> Agronomic practice<br><input type="checkbox"/> Plant protection<br><input type="checkbox"/> GMO cultivation<br><input type="checkbox"/> Environmental conditions                                                                                                                                                                                                                                                                                     |                                                                                                                                                                                                                                                                                              |
| Duplication of Farmer's questionnaire                                              | <input checked="" type="checkbox"/> No duplication<br><input type="checkbox"/> Partly duplication<br><input type="checkbox"/> Complete duplication                                                                                                                                                                                                                                   |                                                                                                                                                                                                                                                                                                                                                                                                                                                                                                                              |                                                                                                                                                                                                                                                                                              |
| <b>SPECIFICITY</b>                                                                 |                                                                                                                                                                                                                                                                                                                                                                                      |                                                                                                                                                                                                                                                                                                                                                                                                                                                                                                                              |                                                                                                                                                                                                                                                                                              |
| Geography                                                                          | <input type="checkbox"/> EU -wide<br><input type="checkbox"/> Zone A – North<br><input checked="" type="checkbox"/> Zone B – Centre:<br><input type="checkbox"/> Zone C – South                                                                                                                                                                                                      |                                                                                                                                                                                                                                                                                                                                                                                                                                                                                                                              |                                                                                                                                                                                                                                                                                              |
|                                                                                    | <input type="checkbox"/> Denmark,<br><input type="checkbox"/> Estonia,<br><input type="checkbox"/> Latvia,<br><input type="checkbox"/> Lithuania,<br><input type="checkbox"/> Finland,<br><input type="checkbox"/> Sweden                                                                                                                                                            | <input type="checkbox"/> Belgium,<br><input type="checkbox"/> Czech Republic<br><input type="checkbox"/> Germany,<br><input type="checkbox"/> Ireland,<br><input type="checkbox"/> Luxembourg,<br><input type="checkbox"/> Hungary,<br><input checked="" type="checkbox"/> Netherlands,<br><input type="checkbox"/> Austria,<br><input type="checkbox"/> Poland,<br><input type="checkbox"/> Romania,<br><input type="checkbox"/> Slovenia,<br><input type="checkbox"/> Slovakia,<br><input type="checkbox"/> United Kingdom | <input type="checkbox"/> Bulgaria,<br><input type="checkbox"/> Greece,<br><input type="checkbox"/> Spain,<br><input type="checkbox"/> France,<br><input type="checkbox"/> Italy,<br><input type="checkbox"/> Cyprus,<br><input type="checkbox"/> Malta,<br><input type="checkbox"/> Portugal |
|                                                                                    | <input type="checkbox"/> Regional (specify)<br><input type="checkbox"/> Local (specify)                                                                                                                                                                                                                                                                                              |                                                                                                                                                                                                                                                                                                                                                                                                                                                                                                                              |                                                                                                                                                                                                                                                                                              |
| Factors                                                                            | <input checked="" type="checkbox"/> Multiple species/items (specify): insects (bees, macrolepidoptera, Coleoptera, Diptera,..)<br><input type="checkbox"/> Single species/item (specify)                                                                                                                                                                                             |                                                                                                                                                                                                                                                                                                                                                                                                                                                                                                                              |                                                                                                                                                                                                                                                                                              |
| Crop                                                                               | <input checked="" type="checkbox"/> No specific crop(s)<br><input type="checkbox"/> Several crops (e.g. all cereals)<br><input type="checkbox"/> Single crop                                                                                                                                                                                                                         |                                                                                                                                                                                                                                                                                                                                                                                                                                                                                                                              |                                                                                                                                                                                                                                                                                              |
| Trait /treatment                                                                   | <input checked="" type="checkbox"/> No specific traits/treatments<br><input type="checkbox"/> Several traits/treatments<br><input type="checkbox"/> Single trait/treatment                                                                                                                                                                                                           |                                                                                                                                                                                                                                                                                                                                                                                                                                                                                                                              |                                                                                                                                                                                                                                                                                              |
| GMO                                                                                | <input checked="" type="checkbox"/> No GMO bias<br><input type="checkbox"/> GMO specific                                                                                                                                                                                                                                                                                             |                                                                                                                                                                                                                                                                                                                                                                                                                                                                                                                              |                                                                                                                                                                                                                                                                                              |
| <b>METHODOLOGY</b>                                                                 |                                                                                                                                                                                                                                                                                                                                                                                      |                                                                                                                                                                                                                                                                                                                                                                                                                                                                                                                              |                                                                                                                                                                                                                                                                                              |
| Observations                                                                       | <input checked="" type="checkbox"/> Reported, verifiable methodology<br><input type="checkbox"/> Reported, unverifiable methodology                                                                                                                                                                                                                                                  |                                                                                                                                                                                                                                                                                                                                                                                                                                                                                                                              |                                                                                                                                                                                                                                                                                              |

|                                                                                                                                          |                                                                                                                                                                                                                                                                                   |
|------------------------------------------------------------------------------------------------------------------------------------------|-----------------------------------------------------------------------------------------------------------------------------------------------------------------------------------------------------------------------------------------------------------------------------------|
|                                                                                                                                          | <input type="checkbox"/> Unknown, unverifiable methodology                                                                                                                                                                                                                        |
| Frequency                                                                                                                                | <input checked="" type="checkbox"/> > 1 time/year<br><input type="checkbox"/> 1 time/year<br><input type="checkbox"/> < 1 time/year                                                                                                                                               |
| Future                                                                                                                                   | <input checked="" type="checkbox"/> For $\geq 5$ years<br><input type="checkbox"/> between 1 and 5 years<br><input type="checkbox"/> no prospect                                                                                                                                  |
| Quality of performers                                                                                                                    | <input type="checkbox"/> Trained, professionals<br><input checked="" type="checkbox"/> Trained, non-professionals – training by documentation, volunteers<br><input type="checkbox"/> Uncertain or not -specified                                                                 |
| Quality of data                                                                                                                          | <input checked="" type="checkbox"/> Standard recording of raw data<br><input type="checkbox"/> Free recording of raw data<br><input type="checkbox"/> Anecdotic                                                                                                                   |
| Analysis                                                                                                                                 | <input checked="" type="checkbox"/> Reported, verifiable methodology<br><input type="checkbox"/> Reported, unverifiable methodology<br><input type="checkbox"/> Unknown, unverifiable methodology                                                                                 |
| Quality of analysis                                                                                                                      | <input checked="" type="checkbox"/> Scientifically based<br><input type="checkbox"/> Indicative only<br><input type="checkbox"/> Unknown                                                                                                                                          |
| <b>REPORTING</b>                                                                                                                         |                                                                                                                                                                                                                                                                                   |
| Language                                                                                                                                 | Reporting language(s): Dutch/English                                                                                                                                                                                                                                              |
| Availability                                                                                                                             | <input checked="" type="checkbox"/> Scientific publication<br><input checked="" type="checkbox"/> Official report available on the internet or in other public forum<br><input type="checkbox"/> Official report available from network<br><input type="checkbox"/> Not available |
| Frequency                                                                                                                                | <input checked="" type="checkbox"/> $\geq 1$ time/year – Newsletters<br><input type="checkbox"/> < 1 time/year – Reports per species or on local findings; distribution maps                                                                                                      |
| Historical reference                                                                                                                     | <input checked="" type="checkbox"/> over $\geq 5$ years<br><input type="checkbox"/> between 1 and 5 years<br><input type="checkbox"/> no historical analysis                                                                                                                      |
| <b>COMMENT(S)</b>                                                                                                                        |                                                                                                                                                                                                                                                                                   |
| Formal monitoring network, verifying a broad range of insects. Scientific publications and newsletters, some only accessible to members. |                                                                                                                                                                                                                                                                                   |

## GSEN-09-0030.00.2 NL – PPO

| EuropaBio's coordinated approach to General Surveillance: Existing Networks |                                                                                                                                                                                                                                                                                                                                                                             |                                                                                                                                                                                                                                                                                                                                                                                                                                                                                                                              |                                                                                                                                                                                                                                                                                              |
|-----------------------------------------------------------------------------|-----------------------------------------------------------------------------------------------------------------------------------------------------------------------------------------------------------------------------------------------------------------------------------------------------------------------------------------------------------------------------|------------------------------------------------------------------------------------------------------------------------------------------------------------------------------------------------------------------------------------------------------------------------------------------------------------------------------------------------------------------------------------------------------------------------------------------------------------------------------------------------------------------------------|----------------------------------------------------------------------------------------------------------------------------------------------------------------------------------------------------------------------------------------------------------------------------------------------|
| <b>ORGANISATION</b>                                                         |                                                                                                                                                                                                                                                                                                                                                                             |                                                                                                                                                                                                                                                                                                                                                                                                                                                                                                                              |                                                                                                                                                                                                                                                                                              |
| EuropaBio reference                                                         | GS-EN-09-0030                                                                                                                                                                                                                                                                                                                                                               |                                                                                                                                                                                                                                                                                                                                                                                                                                                                                                                              |                                                                                                                                                                                                                                                                                              |
| Official name of the Network                                                | <b>Wageningen Universiteit en Researchcentrum<br/>Praktijkonderzoek Plant &amp; Omgeving</b>                                                                                                                                                                                                                                                                                |                                                                                                                                                                                                                                                                                                                                                                                                                                                                                                                              |                                                                                                                                                                                                                                                                                              |
| Other names                                                                 | PPO<br>Wageningen UR: Applied Plant Research                                                                                                                                                                                                                                                                                                                                |                                                                                                                                                                                                                                                                                                                                                                                                                                                                                                                              |                                                                                                                                                                                                                                                                                              |
| Type of organisation                                                        | Academic<br>Founded 1876                                                                                                                                                                                                                                                                                                                                                    |                                                                                                                                                                                                                                                                                                                                                                                                                                                                                                                              |                                                                                                                                                                                                                                                                                              |
| Coordinates                                                                 | Gebouw: 107 (Radix)<br>Droevendaalsesteeg 1<br>6708 PB Wageningen<br><br>Email: info.ppo[at]wur.nl                                                                                                                                                                                                                                                                          |                                                                                                                                                                                                                                                                                                                                                                                                                                                                                                                              |                                                                                                                                                                                                                                                                                              |
| Website                                                                     | <a href="http://www.ppo.wur.nl/UK/">http://www.ppo.wur.nl/UK/</a>                                                                                                                                                                                                                                                                                                           |                                                                                                                                                                                                                                                                                                                                                                                                                                                                                                                              |                                                                                                                                                                                                                                                                                              |
| Funding                                                                     | Government funding, subsidies, projects, tuition fees                                                                                                                                                                                                                                                                                                                       |                                                                                                                                                                                                                                                                                                                                                                                                                                                                                                                              |                                                                                                                                                                                                                                                                                              |
| Conflict of interest                                                        | -                                                                                                                                                                                                                                                                                                                                                                           |                                                                                                                                                                                                                                                                                                                                                                                                                                                                                                                              |                                                                                                                                                                                                                                                                                              |
| Part of other network(s)                                                    |                                                                                                                                                                                                                                                                                                                                                                             |                                                                                                                                                                                                                                                                                                                                                                                                                                                                                                                              |                                                                                                                                                                                                                                                                                              |
| Grouping other network(s)                                                   |                                                                                                                                                                                                                                                                                                                                                                             |                                                                                                                                                                                                                                                                                                                                                                                                                                                                                                                              |                                                                                                                                                                                                                                                                                              |
| <b>MONITORING SUBJECT</b>                                                   |                                                                                                                                                                                                                                                                                                                                                                             |                                                                                                                                                                                                                                                                                                                                                                                                                                                                                                                              |                                                                                                                                                                                                                                                                                              |
| Description                                                                 | Research on economics of agronomic practices                                                                                                                                                                                                                                                                                                                                |                                                                                                                                                                                                                                                                                                                                                                                                                                                                                                                              |                                                                                                                                                                                                                                                                                              |
| Protection goal(s) and/or influencing factor(s)                             | <input checked="" type="checkbox"/> Protection goal<br><input type="checkbox"/> Biodiversity<br><input type="checkbox"/> Human Health<br><input type="checkbox"/> Animal Health<br><input type="checkbox"/> Plant Health<br><input type="checkbox"/> Soil function<br><input type="checkbox"/> Water quality<br><input checked="" type="checkbox"/> Sustainable Agriculture | <input checked="" type="checkbox"/> Influencing factor<br><input checked="" type="checkbox"/> Agronomic practice<br><input type="checkbox"/> Plant protection<br><input type="checkbox"/> GMO cultivation<br><input type="checkbox"/> Environmental conditions                                                                                                                                                                                                                                                               |                                                                                                                                                                                                                                                                                              |
| Duplication of Farmer's questionnaire                                       | <input checked="" type="checkbox"/> No duplication<br><input type="checkbox"/> Partly duplication<br><input type="checkbox"/> Complete duplication                                                                                                                                                                                                                          |                                                                                                                                                                                                                                                                                                                                                                                                                                                                                                                              |                                                                                                                                                                                                                                                                                              |
| <b>SPECIFICITY</b>                                                          |                                                                                                                                                                                                                                                                                                                                                                             |                                                                                                                                                                                                                                                                                                                                                                                                                                                                                                                              |                                                                                                                                                                                                                                                                                              |
| Geography                                                                   | <input type="checkbox"/> EU -wide                                                                                                                                                                                                                                                                                                                                           |                                                                                                                                                                                                                                                                                                                                                                                                                                                                                                                              |                                                                                                                                                                                                                                                                                              |
|                                                                             | <input type="checkbox"/> Zone A – North                                                                                                                                                                                                                                                                                                                                     | <input checked="" type="checkbox"/> Zone B – Centre:                                                                                                                                                                                                                                                                                                                                                                                                                                                                         | <input type="checkbox"/> Zone C – South                                                                                                                                                                                                                                                      |
|                                                                             | <input type="checkbox"/> Denmark,<br><input type="checkbox"/> Estonia,<br><input type="checkbox"/> Latvia,<br><input type="checkbox"/> Lithuania,<br><input type="checkbox"/> Finland,<br><input type="checkbox"/> Sweden                                                                                                                                                   | <input type="checkbox"/> Belgium,<br><input type="checkbox"/> Czech Republic<br><input type="checkbox"/> Germany,<br><input type="checkbox"/> Ireland,<br><input type="checkbox"/> Luxembourg,<br><input type="checkbox"/> Hungary,<br><input checked="" type="checkbox"/> Netherlands,<br><input type="checkbox"/> Austria,<br><input type="checkbox"/> Poland,<br><input type="checkbox"/> Romania,<br><input type="checkbox"/> Slovenia,<br><input type="checkbox"/> Slovakia,<br><input type="checkbox"/> United Kingdom | <input type="checkbox"/> Bulgaria,<br><input type="checkbox"/> Greece,<br><input type="checkbox"/> Spain,<br><input type="checkbox"/> France,<br><input type="checkbox"/> Italy,<br><input type="checkbox"/> Cyprus,<br><input type="checkbox"/> Malta,<br><input type="checkbox"/> Portugal |
|                                                                             | <input type="checkbox"/> Regional (specify)<br><input type="checkbox"/> Local (specify)                                                                                                                                                                                                                                                                                     |                                                                                                                                                                                                                                                                                                                                                                                                                                                                                                                              |                                                                                                                                                                                                                                                                                              |
| Factors                                                                     | <input checked="" type="checkbox"/> Multiple species/items (specify) reptiles, fish and amphibians<br><input type="checkbox"/> Single species/item (specify)                                                                                                                                                                                                                |                                                                                                                                                                                                                                                                                                                                                                                                                                                                                                                              |                                                                                                                                                                                                                                                                                              |
| Crop                                                                        | <input checked="" type="checkbox"/> No specific crop(s)<br><input type="checkbox"/> Several crops (e.g. all cereals)<br><input type="checkbox"/> Single crop                                                                                                                                                                                                                |                                                                                                                                                                                                                                                                                                                                                                                                                                                                                                                              |                                                                                                                                                                                                                                                                                              |
| Trait /treatment                                                            | <input checked="" type="checkbox"/> No specific traits/treatments<br><input type="checkbox"/> Several traits/treatments<br><input type="checkbox"/> Single trait/treatment                                                                                                                                                                                                  |                                                                                                                                                                                                                                                                                                                                                                                                                                                                                                                              |                                                                                                                                                                                                                                                                                              |
| GMO                                                                         | <input checked="" type="checkbox"/> No GMO bias<br><input type="checkbox"/> GMO specific                                                                                                                                                                                                                                                                                    |                                                                                                                                                                                                                                                                                                                                                                                                                                                                                                                              |                                                                                                                                                                                                                                                                                              |
| <b>METHODOLOGY</b>                                                          |                                                                                                                                                                                                                                                                                                                                                                             |                                                                                                                                                                                                                                                                                                                                                                                                                                                                                                                              |                                                                                                                                                                                                                                                                                              |

|                                                                                                                                       |                                                                                                                                                                                                                                                                                   |
|---------------------------------------------------------------------------------------------------------------------------------------|-----------------------------------------------------------------------------------------------------------------------------------------------------------------------------------------------------------------------------------------------------------------------------------|
| Observations                                                                                                                          | <input checked="" type="checkbox"/> Reported, verifiable methodology<br><input type="checkbox"/> Reported, unverifiable methodology<br><input type="checkbox"/> Unknown, unverifiable methodology                                                                                 |
| Frequency                                                                                                                             | <input checked="" type="checkbox"/> > 1 time/year<br><input type="checkbox"/> 1 time/year<br><input type="checkbox"/> < 1 time/year                                                                                                                                               |
| Future                                                                                                                                | <input checked="" type="checkbox"/> For $\geq 5$ years<br><input type="checkbox"/> between 1 and 5 years<br><input type="checkbox"/> no prospect                                                                                                                                  |
| Quality of performers                                                                                                                 | <input checked="" type="checkbox"/> Trained, professionals<br><input type="checkbox"/> Trained, non-professionals – training by documentation, volunteers<br><input type="checkbox"/> Uncertain or not -specified                                                                 |
| Quality of data                                                                                                                       | <input checked="" type="checkbox"/> Standard recording of raw data<br><input type="checkbox"/> Free recording of raw data<br><input type="checkbox"/> Anecdotic                                                                                                                   |
| Analysis                                                                                                                              | <input checked="" type="checkbox"/> Reported, verifiable methodology<br><input type="checkbox"/> Reported, unverifiable methodology<br><input type="checkbox"/> Unknown, unverifiable methodology                                                                                 |
| Quality of analysis                                                                                                                   | <input checked="" type="checkbox"/> Scientifically based<br><input type="checkbox"/> Indicative only<br><input type="checkbox"/> Unknown                                                                                                                                          |
| <b>REPORTING</b>                                                                                                                      |                                                                                                                                                                                                                                                                                   |
| Language                                                                                                                              | Reporting language(s): Dutch/English                                                                                                                                                                                                                                              |
| Availability                                                                                                                          | <input checked="" type="checkbox"/> Scientific publication<br><input checked="" type="checkbox"/> Official report available on the internet or in other public forum<br><input type="checkbox"/> Official report available from network<br><input type="checkbox"/> Not available |
| Frequency                                                                                                                             | <input checked="" type="checkbox"/> $\geq 1$ time/year – Yearly reports on agronomic practices<br><input type="checkbox"/> < 1 time/year – Specific publications                                                                                                                  |
| Historical reference                                                                                                                  | <input checked="" type="checkbox"/> over $\geq 5$ years<br><input type="checkbox"/> between 1 and 5 years<br><input type="checkbox"/> no historical analysis                                                                                                                      |
| <b>COMMENT(S)</b>                                                                                                                     |                                                                                                                                                                                                                                                                                   |
| No formal monitoring network, but selected information on specific agricultural themes. Some reports are only available upon payment. |                                                                                                                                                                                                                                                                                   |

## GSEN-09-0031.00.2 NL – Naturalis

| EuropaBio's coordinated approach to General Surveillance: Existing Networks |                                                                                                                                                                                                                                                                                                                                                                                                                                                                                                                                                                                      |                                                                                                                                                                                                                                                                                                                                         |  |
|-----------------------------------------------------------------------------|--------------------------------------------------------------------------------------------------------------------------------------------------------------------------------------------------------------------------------------------------------------------------------------------------------------------------------------------------------------------------------------------------------------------------------------------------------------------------------------------------------------------------------------------------------------------------------------|-----------------------------------------------------------------------------------------------------------------------------------------------------------------------------------------------------------------------------------------------------------------------------------------------------------------------------------------|--|
| <b>ORGANISATION</b>                                                         |                                                                                                                                                                                                                                                                                                                                                                                                                                                                                                                                                                                      |                                                                                                                                                                                                                                                                                                                                         |  |
| EuropaBio reference                                                         | GS-EN-09-0031                                                                                                                                                                                                                                                                                                                                                                                                                                                                                                                                                                        |                                                                                                                                                                                                                                                                                                                                         |  |
| Official name of the Network                                                | <b>Naturalis</b>                                                                                                                                                                                                                                                                                                                                                                                                                                                                                                                                                                     |                                                                                                                                                                                                                                                                                                                                         |  |
| Other names                                                                 | Nationaal Natuurhistorisch Museum<br>National Museum of Natural History                                                                                                                                                                                                                                                                                                                                                                                                                                                                                                              |                                                                                                                                                                                                                                                                                                                                         |  |
| Type of organisation                                                        | Academic                                                                                                                                                                                                                                                                                                                                                                                                                                                                                                                                                                             |                                                                                                                                                                                                                                                                                                                                         |  |
| Coordinates                                                                 | Darwinweg 2<br>2333 CR Leiden<br><br>Fax 071 568 76 66<br>Email : naturalis[at]naturalis.nl                                                                                                                                                                                                                                                                                                                                                                                                                                                                                          |                                                                                                                                                                                                                                                                                                                                         |  |
| Website                                                                     | <a href="http://www.naturalis.nl">www.naturalis.nl</a>                                                                                                                                                                                                                                                                                                                                                                                                                                                                                                                               |                                                                                                                                                                                                                                                                                                                                         |  |
| Funding                                                                     | Sponsors, subsidies, projects                                                                                                                                                                                                                                                                                                                                                                                                                                                                                                                                                        |                                                                                                                                                                                                                                                                                                                                         |  |
| Conflict of interest                                                        | -                                                                                                                                                                                                                                                                                                                                                                                                                                                                                                                                                                                    |                                                                                                                                                                                                                                                                                                                                         |  |
| Part of other network(s)                                                    | Collaboration with:<br>EIS and<br>PSO (Platform Soortbeschermende Organisaties)                                                                                                                                                                                                                                                                                                                                                                                                                                                                                                      |                                                                                                                                                                                                                                                                                                                                         |  |
| Grouping other network(s)                                                   |                                                                                                                                                                                                                                                                                                                                                                                                                                                                                                                                                                                      |                                                                                                                                                                                                                                                                                                                                         |  |
| <b>MONITORING SUBJECT</b>                                                   |                                                                                                                                                                                                                                                                                                                                                                                                                                                                                                                                                                                      |                                                                                                                                                                                                                                                                                                                                         |  |
| Description                                                                 | Collection of species, biodiversity<br>3 depts: terrestrial zoology, marine zoology, geology                                                                                                                                                                                                                                                                                                                                                                                                                                                                                         |                                                                                                                                                                                                                                                                                                                                         |  |
| Protection goal(s) and/or influencing factor(s)                             | <input checked="" type="checkbox"/> Protection goal<br><br><input checked="" type="checkbox"/> Biodiversity: general<br><input type="checkbox"/> Human Health<br><input type="checkbox"/> Animal Health<br><input type="checkbox"/> Plant Health<br><input type="checkbox"/> Soil function<br><input type="checkbox"/> Water quality<br><input type="checkbox"/> Sustainable Agriculture                                                                                                                                                                                             | <input type="checkbox"/> Influencing factor<br><br><input type="checkbox"/> Agronomic practice<br><input type="checkbox"/> Plant protection<br><input type="checkbox"/> GMO cultivation<br><input type="checkbox"/> Environmental conditions                                                                                            |  |
| Duplication of Farmer's questionnaire                                       | <input checked="" type="checkbox"/> No duplication<br><input type="checkbox"/> Partly duplication<br><input type="checkbox"/> Complete duplication                                                                                                                                                                                                                                                                                                                                                                                                                                   |                                                                                                                                                                                                                                                                                                                                         |  |
| <b>SPECIFICITY</b>                                                          |                                                                                                                                                                                                                                                                                                                                                                                                                                                                                                                                                                                      |                                                                                                                                                                                                                                                                                                                                         |  |
| Geography                                                                   | <input type="checkbox"/> EU -wide<br><br><input type="checkbox"/> Zone A – North<br><input type="checkbox"/> Denmark,<br><input type="checkbox"/> Estonia,<br><input type="checkbox"/> Latvia,<br><input type="checkbox"/> Lithuania,<br><input type="checkbox"/> Finland,<br><input type="checkbox"/> Sweden                                                                                                                                                                                                                                                                        |                                                                                                                                                                                                                                                                                                                                         |  |
|                                                                             | <input checked="" type="checkbox"/> Zone B – Centre:<br><input type="checkbox"/> Belgium,<br><input type="checkbox"/> Czech Republic<br><input type="checkbox"/> Germany,<br><input type="checkbox"/> Ireland,<br><input type="checkbox"/> Luxembourg,<br><input type="checkbox"/> Hungary,<br><input checked="" type="checkbox"/> Netherlands,<br><input type="checkbox"/> Austria,<br><input type="checkbox"/> Poland,<br><input type="checkbox"/> Romania,<br><input type="checkbox"/> Slovenia,<br><input type="checkbox"/> Slovakia,<br><input type="checkbox"/> United Kingdom | <input type="checkbox"/> Zone C – South<br><input type="checkbox"/> Bulgaria,<br><input type="checkbox"/> Greece,<br><input type="checkbox"/> Spain,<br><input type="checkbox"/> France,<br><input type="checkbox"/> Italy,<br><input type="checkbox"/> Cyprus,<br><input type="checkbox"/> Malta,<br><input type="checkbox"/> Portugal |  |
|                                                                             | <input type="checkbox"/> Regional (specify)<br><input type="checkbox"/> Local (specify)                                                                                                                                                                                                                                                                                                                                                                                                                                                                                              |                                                                                                                                                                                                                                                                                                                                         |  |
| Factors                                                                     | <input checked="" type="checkbox"/> Multiple species/items (specify) all species<br><input type="checkbox"/> Single species/item (specify)                                                                                                                                                                                                                                                                                                                                                                                                                                           |                                                                                                                                                                                                                                                                                                                                         |  |
| Crop                                                                        | <input checked="" type="checkbox"/> No specific crop(s)<br><input type="checkbox"/> Several crops (e.g. all cereals)<br><input type="checkbox"/> Single crop                                                                                                                                                                                                                                                                                                                                                                                                                         |                                                                                                                                                                                                                                                                                                                                         |  |
| Trait /treatment                                                            | <input checked="" type="checkbox"/> No specific traits/treatments<br><input type="checkbox"/> Several traits/treatments<br><input type="checkbox"/> Single trait/treatment                                                                                                                                                                                                                                                                                                                                                                                                           |                                                                                                                                                                                                                                                                                                                                         |  |
| GMO                                                                         | <input checked="" type="checkbox"/> No GMO bias<br><input type="checkbox"/> GMO specific                                                                                                                                                                                                                                                                                                                                                                                                                                                                                             |                                                                                                                                                                                                                                                                                                                                         |  |

| <b>METHODOLOGY</b>                                   |                                                                                                                                                                                                                                                                                   |
|------------------------------------------------------|-----------------------------------------------------------------------------------------------------------------------------------------------------------------------------------------------------------------------------------------------------------------------------------|
| Observations                                         | <input checked="" type="checkbox"/> Reported, verifiable methodology<br><input type="checkbox"/> Reported, unverifiable methodology<br><input type="checkbox"/> Unknown, unverifiable methodology                                                                                 |
| Frequency                                            | <input checked="" type="checkbox"/> > 1 time/year<br><input type="checkbox"/> 1 time/year<br><input type="checkbox"/> < 1 time/year                                                                                                                                               |
| Future                                               | <input checked="" type="checkbox"/> For ≥ 5 years<br><input type="checkbox"/> between 1 and 5 years<br><input type="checkbox"/> no prospect                                                                                                                                       |
| Quality of performers                                | <input checked="" type="checkbox"/> Trained, professionals<br><input type="checkbox"/> Trained, non-professionals – training by documentation, volunteers<br><input type="checkbox"/> Uncertain or not -specified                                                                 |
| Quality of data                                      | <input checked="" type="checkbox"/> Standard recording of raw data<br><input type="checkbox"/> Free recording of raw data<br><input type="checkbox"/> Anecdotic                                                                                                                   |
| Analysis                                             | <input checked="" type="checkbox"/> Reported, verifiable methodology<br><input type="checkbox"/> Reported, unverifiable methodology<br><input type="checkbox"/> Unknown, unverifiable methodology                                                                                 |
| Quality of analysis                                  | <input checked="" type="checkbox"/> Scientifically based<br><input type="checkbox"/> Indicative only<br><input type="checkbox"/> Unknown                                                                                                                                          |
| <b>REPORTING</b>                                     |                                                                                                                                                                                                                                                                                   |
| Language                                             | Reporting language(s): Dutch/English                                                                                                                                                                                                                                              |
| Availability                                         | <input checked="" type="checkbox"/> Scientific publication<br><input checked="" type="checkbox"/> Official report available on the internet or in other public forum<br><input type="checkbox"/> Official report available from network<br><input type="checkbox"/> Not available |
| Frequency                                            | <input checked="" type="checkbox"/> ≥ 1 time/year – Several reports and publications<br><input type="checkbox"/> < 1 time/year – Reports per species or on local findings; distribution maps                                                                                      |
| Historical reference                                 | <input checked="" type="checkbox"/> over ≥ 5 years<br><input type="checkbox"/> between 1 and 5 years<br><input type="checkbox"/> no historical analysis                                                                                                                           |
| <b>COMMENT(S)</b>                                    |                                                                                                                                                                                                                                                                                   |
| Network inventorying and communicating biodiversity. |                                                                                                                                                                                                                                                                                   |

## GSEN-09-0032.00.2 NL – Species Catalogue

| EuropaBio's coordinated approach to General Surveillance: Existing Networks |                                                                                                                                                                                                                                                                                                                                                                                                                                                                                                                                                                                                                                                                                                                                                                                                                                                                                                                                                                       |                                                                                                                                                                                                                                                                                                                                         |  |
|-----------------------------------------------------------------------------|-----------------------------------------------------------------------------------------------------------------------------------------------------------------------------------------------------------------------------------------------------------------------------------------------------------------------------------------------------------------------------------------------------------------------------------------------------------------------------------------------------------------------------------------------------------------------------------------------------------------------------------------------------------------------------------------------------------------------------------------------------------------------------------------------------------------------------------------------------------------------------------------------------------------------------------------------------------------------|-----------------------------------------------------------------------------------------------------------------------------------------------------------------------------------------------------------------------------------------------------------------------------------------------------------------------------------------|--|
| <b>ORGANISATION</b>                                                         |                                                                                                                                                                                                                                                                                                                                                                                                                                                                                                                                                                                                                                                                                                                                                                                                                                                                                                                                                                       |                                                                                                                                                                                                                                                                                                                                         |  |
| EuropaBio reference                                                         | GS-EN-09-0032                                                                                                                                                                                                                                                                                                                                                                                                                                                                                                                                                                                                                                                                                                                                                                                                                                                                                                                                                         |                                                                                                                                                                                                                                                                                                                                         |  |
| Official name of the Network                                                | <b>Nederlands Soortenregister</b>                                                                                                                                                                                                                                                                                                                                                                                                                                                                                                                                                                                                                                                                                                                                                                                                                                                                                                                                     |                                                                                                                                                                                                                                                                                                                                         |  |
| Other names                                                                 | Dutch Species catalogue                                                                                                                                                                                                                                                                                                                                                                                                                                                                                                                                                                                                                                                                                                                                                                                                                                                                                                                                               |                                                                                                                                                                                                                                                                                                                                         |  |
| Type of organisation                                                        | Nature conservation                                                                                                                                                                                                                                                                                                                                                                                                                                                                                                                                                                                                                                                                                                                                                                                                                                                                                                                                                   |                                                                                                                                                                                                                                                                                                                                         |  |
| Coordinates                                                                 | -                                                                                                                                                                                                                                                                                                                                                                                                                                                                                                                                                                                                                                                                                                                                                                                                                                                                                                                                                                     |                                                                                                                                                                                                                                                                                                                                         |  |
| Website                                                                     | <a href="http://www.nederlandsesoorten.nl">http://www.nederlandsesoorten.nl</a>                                                                                                                                                                                                                                                                                                                                                                                                                                                                                                                                                                                                                                                                                                                                                                                                                                                                                       |                                                                                                                                                                                                                                                                                                                                         |  |
| Funding                                                                     | Supported by several organisations (e.g. Naturalis)                                                                                                                                                                                                                                                                                                                                                                                                                                                                                                                                                                                                                                                                                                                                                                                                                                                                                                                   |                                                                                                                                                                                                                                                                                                                                         |  |
| Conflict of interest                                                        | -                                                                                                                                                                                                                                                                                                                                                                                                                                                                                                                                                                                                                                                                                                                                                                                                                                                                                                                                                                     |                                                                                                                                                                                                                                                                                                                                         |  |
| Part of other network(s)                                                    | No formal organisation. Collaboration between scientific institutions, individual experts, organisations of volunteer recorders and the Dutch Ministry of Agriculture, Nature and Food Quality                                                                                                                                                                                                                                                                                                                                                                                                                                                                                                                                                                                                                                                                                                                                                                        |                                                                                                                                                                                                                                                                                                                                         |  |
| Grouping other network(s)                                                   | Anemooon (Stichting Analyse, Educatie en Marien Oecologisch Onderzoek)<br>BLWG-KNNV (Bryologische en Lichenologische WerkGroep KNNV)<br>CBS (Centraal Bureau voor Statistiek)<br>CBS (fungi) Centraal Bureau voor Schimmelcultures<br>EIS-Nederland European Invertebrate Survey – Nederland<br>Fauna Europaea<br>FLORON (Stichting Floristisch Onderzoek Nederland)<br>Ministerie van Landbouw, Natuur en Voedselkwaliteit<br>Naturalis (Nationaal Natuurhistorisch Museum)<br>NEV (Nederlandse Entomologische Vereniging)<br>Nationaal Herbarium Nederland<br>Nederlandse Malacologische Vereniging<br>Nederlandse Mycologische Vereniging<br>Plantenziektenkundige Dienst<br>RAVON (Reptielen-, Amfibieën- en Vissen Onderzoek Nederland)<br>RIVO-DLO (Nederlands Instituut voor Visserijonderzoek)<br>SOVON (Vogelonderzoek Nederland)<br>De Vlinderstichting<br>VOFF (Vereniging Onderzoek Flora en Fauna)<br>Zoölogisch Museum Amsterdam<br>Zoogdierverseniging |                                                                                                                                                                                                                                                                                                                                         |  |
| <b>MONITORING SUBJECT</b>                                                   |                                                                                                                                                                                                                                                                                                                                                                                                                                                                                                                                                                                                                                                                                                                                                                                                                                                                                                                                                                       |                                                                                                                                                                                                                                                                                                                                         |  |
| Description                                                                 | Taxonomy and distribution of species in the Netherlands, inventory                                                                                                                                                                                                                                                                                                                                                                                                                                                                                                                                                                                                                                                                                                                                                                                                                                                                                                    |                                                                                                                                                                                                                                                                                                                                         |  |
| Protection goal(s) and/or influencing factor(s)                             | <input checked="" type="checkbox"/> Protection goal<br><br><input checked="" type="checkbox"/> Biodiversity: general<br><input type="checkbox"/> Human Health<br><input type="checkbox"/> Animal Health<br><input type="checkbox"/> Plant Health<br><input type="checkbox"/> Soil function<br><input type="checkbox"/> Water quality<br><input type="checkbox"/> Sustainable Agriculture                                                                                                                                                                                                                                                                                                                                                                                                                                                                                                                                                                              | <input type="checkbox"/> Influencing factor<br><br><input type="checkbox"/> Agronomic practice<br><input type="checkbox"/> Plant protection<br><input type="checkbox"/> GMO cultivation<br><input type="checkbox"/> Environmental conditions                                                                                            |  |
| Duplication of Farmer's questionnaire                                       | <input checked="" type="checkbox"/> No duplication<br><input type="checkbox"/> Partly duplication<br><input type="checkbox"/> Complete duplication                                                                                                                                                                                                                                                                                                                                                                                                                                                                                                                                                                                                                                                                                                                                                                                                                    |                                                                                                                                                                                                                                                                                                                                         |  |
| <b>SPECIFICITY</b>                                                          |                                                                                                                                                                                                                                                                                                                                                                                                                                                                                                                                                                                                                                                                                                                                                                                                                                                                                                                                                                       |                                                                                                                                                                                                                                                                                                                                         |  |
| Geography                                                                   | <input type="checkbox"/> EU -wide<br><br><input type="checkbox"/> Zone A – North<br><input type="checkbox"/> Denmark,<br><input type="checkbox"/> Estonia,<br><input type="checkbox"/> Latvia,<br><input type="checkbox"/> Lithuania,<br><input type="checkbox"/> Finland,<br><input type="checkbox"/> Sweden                                                                                                                                                                                                                                                                                                                                                                                                                                                                                                                                                                                                                                                         |                                                                                                                                                                                                                                                                                                                                         |  |
|                                                                             | <input checked="" type="checkbox"/> Zone B – Centre:<br><input type="checkbox"/> Belgium,<br><input type="checkbox"/> Czech Republic<br><input type="checkbox"/> Germany,<br><input type="checkbox"/> Ireland,<br><input type="checkbox"/> Luxembourg,<br><input type="checkbox"/> Hungary,<br><input checked="" type="checkbox"/> Netherlands,<br><input type="checkbox"/> Austria,<br><input type="checkbox"/> Poland,<br><input type="checkbox"/> Romania,<br><input type="checkbox"/> Slovenia,<br><input type="checkbox"/> Slovakia,<br><input type="checkbox"/> United Kingdom                                                                                                                                                                                                                                                                                                                                                                                  | <input type="checkbox"/> Zone C – South<br><input type="checkbox"/> Bulgaria,<br><input type="checkbox"/> Greece,<br><input type="checkbox"/> Spain,<br><input type="checkbox"/> France,<br><input type="checkbox"/> Italy,<br><input type="checkbox"/> Cyprus,<br><input type="checkbox"/> Malta,<br><input type="checkbox"/> Portugal |  |

|                                        |                                                                                                                                                                                                                                                                                   |
|----------------------------------------|-----------------------------------------------------------------------------------------------------------------------------------------------------------------------------------------------------------------------------------------------------------------------------------|
|                                        | <input type="checkbox"/> Regional (specify)<br><input type="checkbox"/> Local (specify)                                                                                                                                                                                           |
| Factors                                | <input checked="" type="checkbox"/> Multiple species/items (specify) all species<br><input type="checkbox"/> Single species/item (specify)                                                                                                                                        |
| Crop                                   | <input checked="" type="checkbox"/> No specific crop(s)<br><input type="checkbox"/> Several crops (e.g. all cereals)<br><input type="checkbox"/> Single crop                                                                                                                      |
| Trait /treatment                       | <input checked="" type="checkbox"/> No specific traits/treatments<br><input type="checkbox"/> Several traits/treatments<br><input type="checkbox"/> Single trait/treatment                                                                                                        |
| GMO                                    | <input checked="" type="checkbox"/> No GMO bias<br><input type="checkbox"/> GMO specific                                                                                                                                                                                          |
| <b>METHODOLOGY</b>                     |                                                                                                                                                                                                                                                                                   |
| Observations                           | <input checked="" type="checkbox"/> Reported, verifiable methodology<br><input type="checkbox"/> Reported, unverifiable methodology<br><input type="checkbox"/> Unknown, unverifiable methodology                                                                                 |
| Frequency                              | <input checked="" type="checkbox"/> > 1 time/year<br><input type="checkbox"/> 1 time/year<br><input type="checkbox"/> < 1 time/year                                                                                                                                               |
| Future                                 | <input checked="" type="checkbox"/> For ≥ 5 years<br><input type="checkbox"/> between 1 and 5 years<br><input type="checkbox"/> no prospect                                                                                                                                       |
| Quality of performers                  | <input checked="" type="checkbox"/> Trained, professionals<br><input type="checkbox"/> Trained, non-professionals – training by documentation, volunteers<br><input type="checkbox"/> Uncertain or not -specified                                                                 |
| Quality of data                        | <input checked="" type="checkbox"/> Standard recording of raw data<br><input type="checkbox"/> Free recording of raw data<br><input type="checkbox"/> Anecdotic                                                                                                                   |
| Analysis                               | <input checked="" type="checkbox"/> Reported, verifiable methodology<br><input type="checkbox"/> Reported, unverifiable methodology<br><input type="checkbox"/> Unknown, unverifiable methodology                                                                                 |
| Quality of analysis                    | <input checked="" type="checkbox"/> Scientifically based<br><input type="checkbox"/> Indicative only<br><input type="checkbox"/> Unknown                                                                                                                                          |
| <b>REPORTING</b>                       |                                                                                                                                                                                                                                                                                   |
| Language                               | Reporting language(s): Dutch/English                                                                                                                                                                                                                                              |
| Availability                           | <input checked="" type="checkbox"/> Scientific publication<br><input checked="" type="checkbox"/> Official report available on the internet or in other public forum<br><input type="checkbox"/> Official report available from network<br><input type="checkbox"/> Not available |
| Frequency                              | <input checked="" type="checkbox"/> ≥ 1 time/year – Several reports and publications<br><input type="checkbox"/> < 1 time/year – Reports per species or on local findings; distribution maps                                                                                      |
| Historical reference                   | <input checked="" type="checkbox"/> over ≥ 5 years<br><input type="checkbox"/> between 1 and 5 years<br><input type="checkbox"/> no historical analysis                                                                                                                           |
| <b>COMMENT(S)</b>                      |                                                                                                                                                                                                                                                                                   |
| Focussed on taxonomy and distribution. |                                                                                                                                                                                                                                                                                   |



## GSEN-09-0033.00.2 NL – VOFF

| EuropaBio's coordinated approach to General Surveillance: Existing Networks |                                                                                                                                                                                                                                                                                                                                                                                                                                                        |                                                                                                                                                                                                                                                                                                                                                                                                                                                                                                                              |                                                                                                                                                                                                                                                                                              |
|-----------------------------------------------------------------------------|--------------------------------------------------------------------------------------------------------------------------------------------------------------------------------------------------------------------------------------------------------------------------------------------------------------------------------------------------------------------------------------------------------------------------------------------------------|------------------------------------------------------------------------------------------------------------------------------------------------------------------------------------------------------------------------------------------------------------------------------------------------------------------------------------------------------------------------------------------------------------------------------------------------------------------------------------------------------------------------------|----------------------------------------------------------------------------------------------------------------------------------------------------------------------------------------------------------------------------------------------------------------------------------------------|
| <b>ORGANISATION</b>                                                         |                                                                                                                                                                                                                                                                                                                                                                                                                                                        |                                                                                                                                                                                                                                                                                                                                                                                                                                                                                                                              |                                                                                                                                                                                                                                                                                              |
| EuropaBio reference                                                         | GS-EN-09-0033                                                                                                                                                                                                                                                                                                                                                                                                                                          |                                                                                                                                                                                                                                                                                                                                                                                                                                                                                                                              |                                                                                                                                                                                                                                                                                              |
| Official name of the Network                                                | Stichting Veld Onderzoek Flora en Fauna                                                                                                                                                                                                                                                                                                                                                                                                                |                                                                                                                                                                                                                                                                                                                                                                                                                                                                                                                              |                                                                                                                                                                                                                                                                                              |
| Other names                                                                 | Flora and Fauna Fieldwork Foundation VOFF                                                                                                                                                                                                                                                                                                                                                                                                              |                                                                                                                                                                                                                                                                                                                                                                                                                                                                                                                              |                                                                                                                                                                                                                                                                                              |
| Type of organisation                                                        | Nature conservation                                                                                                                                                                                                                                                                                                                                                                                                                                    |                                                                                                                                                                                                                                                                                                                                                                                                                                                                                                                              |                                                                                                                                                                                                                                                                                              |
| Coordinates                                                                 | Toernooiveld 1<br>6525 ED Nijmegen                                                                                                                                                                                                                                                                                                                                                                                                                     |                                                                                                                                                                                                                                                                                                                                                                                                                                                                                                                              |                                                                                                                                                                                                                                                                                              |
| Website                                                                     | <a href="http://www.voff.nl/">http://www.voff.nl/</a>                                                                                                                                                                                                                                                                                                                                                                                                  |                                                                                                                                                                                                                                                                                                                                                                                                                                                                                                                              |                                                                                                                                                                                                                                                                                              |
| Funding                                                                     | Supported by different organisations (e.g. Naturalis)                                                                                                                                                                                                                                                                                                                                                                                                  |                                                                                                                                                                                                                                                                                                                                                                                                                                                                                                                              |                                                                                                                                                                                                                                                                                              |
| Conflict of interest                                                        | -                                                                                                                                                                                                                                                                                                                                                                                                                                                      |                                                                                                                                                                                                                                                                                                                                                                                                                                                                                                                              |                                                                                                                                                                                                                                                                                              |
| Part of other network(s)                                                    | Network Ecological Monitoring (NEM)                                                                                                                                                                                                                                                                                                                                                                                                                    |                                                                                                                                                                                                                                                                                                                                                                                                                                                                                                                              |                                                                                                                                                                                                                                                                                              |
| Grouping other network(s)                                                   | Anemoon (Stichting ANalyse, Educatie en Marien Oecologisch Onderzoek)<br>BLWG-KNNV (Bryologische en Lichenologische WerkGroep KNNV)<br>EIS-Nederland (European Invertebrate Survey – Nederland)<br>FLORON (Stichting Floristisch Onderzoek Nederland)<br>Nederlandse Mycologische Vereniging<br>RAVON (Reptielen-, Amfibieën- en Vissen Onderzoek Nederland)<br>SOVON (Vogelonderzoek Nederland)<br>Tinea<br>De Vlinderstichting<br>Zoogdiervereniging |                                                                                                                                                                                                                                                                                                                                                                                                                                                                                                                              |                                                                                                                                                                                                                                                                                              |
| <b>MONITORING SUBJECT</b>                                                   |                                                                                                                                                                                                                                                                                                                                                                                                                                                        |                                                                                                                                                                                                                                                                                                                                                                                                                                                                                                                              |                                                                                                                                                                                                                                                                                              |
| Description                                                                 | The umbrella activity provides data delivery, ecological interpretation, ecological consultancy, inventory and Quick Scans, as well as supports monitoring                                                                                                                                                                                                                                                                                             |                                                                                                                                                                                                                                                                                                                                                                                                                                                                                                                              |                                                                                                                                                                                                                                                                                              |
| Protection goal(s) and/or influencing factor(s)                             | <input checked="" type="checkbox"/> Protection goal<br><input checked="" type="checkbox"/> Biodiversity: general<br><input type="checkbox"/> Human Health<br><input type="checkbox"/> Animal Health<br><input type="checkbox"/> Plant Health<br><input type="checkbox"/> Soil function<br><input type="checkbox"/> Water quality<br><input type="checkbox"/> Sustainable Agriculture                                                                   | <input type="checkbox"/> Influencing factor<br><input type="checkbox"/> Agronomic practice<br><input type="checkbox"/> Plant protection<br><input type="checkbox"/> GMO cultivation<br><input type="checkbox"/> Environmental conditions                                                                                                                                                                                                                                                                                     |                                                                                                                                                                                                                                                                                              |
| Duplication of Farmer's questionnaire                                       | <input checked="" type="checkbox"/> No duplication<br><input type="checkbox"/> Partly duplication<br><input type="checkbox"/> Complete duplication                                                                                                                                                                                                                                                                                                     |                                                                                                                                                                                                                                                                                                                                                                                                                                                                                                                              |                                                                                                                                                                                                                                                                                              |
| <b>SPECIFICITY</b>                                                          |                                                                                                                                                                                                                                                                                                                                                                                                                                                        |                                                                                                                                                                                                                                                                                                                                                                                                                                                                                                                              |                                                                                                                                                                                                                                                                                              |
| Geography                                                                   | <input type="checkbox"/> EU -wide<br><input type="checkbox"/> Zone A – North<br><input checked="" type="checkbox"/> Zone B – Centre:<br><input type="checkbox"/> Zone C – South                                                                                                                                                                                                                                                                        |                                                                                                                                                                                                                                                                                                                                                                                                                                                                                                                              |                                                                                                                                                                                                                                                                                              |
|                                                                             | <input type="checkbox"/> Denmark,<br><input type="checkbox"/> Estonia,<br><input type="checkbox"/> Latvia,<br><input type="checkbox"/> Lithuania,<br><input type="checkbox"/> Finland,<br><input type="checkbox"/> Sweden                                                                                                                                                                                                                              | <input type="checkbox"/> Belgium,<br><input type="checkbox"/> Czech Republic<br><input type="checkbox"/> Germany,<br><input type="checkbox"/> Ireland,<br><input type="checkbox"/> Luxembourg,<br><input type="checkbox"/> Hungary,<br><input checked="" type="checkbox"/> Netherlands,<br><input type="checkbox"/> Austria,<br><input type="checkbox"/> Poland,<br><input type="checkbox"/> Romania,<br><input type="checkbox"/> Slovenia,<br><input type="checkbox"/> Slovakia,<br><input type="checkbox"/> United Kingdom | <input type="checkbox"/> Bulgaria,<br><input type="checkbox"/> Greece,<br><input type="checkbox"/> Spain,<br><input type="checkbox"/> France,<br><input type="checkbox"/> Italy,<br><input type="checkbox"/> Cyprus,<br><input type="checkbox"/> Malta,<br><input type="checkbox"/> Portugal |
|                                                                             | <input type="checkbox"/> Regional (specify)<br><input type="checkbox"/> Local (specify)                                                                                                                                                                                                                                                                                                                                                                |                                                                                                                                                                                                                                                                                                                                                                                                                                                                                                                              |                                                                                                                                                                                                                                                                                              |
| Factors                                                                     | <input checked="" type="checkbox"/> Multiple species/items (specify): most terrestrial<br><input type="checkbox"/> Single species/item (specify)                                                                                                                                                                                                                                                                                                       |                                                                                                                                                                                                                                                                                                                                                                                                                                                                                                                              |                                                                                                                                                                                                                                                                                              |
| Crop                                                                        | <input checked="" type="checkbox"/> No specific crop(s)<br><input type="checkbox"/> Several crops (e.g. all cereals)<br><input type="checkbox"/> Single crop                                                                                                                                                                                                                                                                                           |                                                                                                                                                                                                                                                                                                                                                                                                                                                                                                                              |                                                                                                                                                                                                                                                                                              |
| Trait /treatment                                                            | <input checked="" type="checkbox"/> No specific traits/treatments<br><input type="checkbox"/> Several traits/treatments<br><input type="checkbox"/> Single trait/treatment                                                                                                                                                                                                                                                                             |                                                                                                                                                                                                                                                                                                                                                                                                                                                                                                                              |                                                                                                                                                                                                                                                                                              |

|                                                           |                                                                                                                                                                                                                                                                                              |
|-----------------------------------------------------------|----------------------------------------------------------------------------------------------------------------------------------------------------------------------------------------------------------------------------------------------------------------------------------------------|
| GMO                                                       | <input checked="" type="checkbox"/> No GMO bias<br><input type="checkbox"/> GMO specific                                                                                                                                                                                                     |
| <b>METHODOLOGY</b>                                        |                                                                                                                                                                                                                                                                                              |
| Observations                                              | <input checked="" type="checkbox"/> Reported, verifiable methodology<br><input type="checkbox"/> Reported, unverifiable methodology<br><input type="checkbox"/> Unknown, unverifiable methodology                                                                                            |
| Frequency                                                 | <input checked="" type="checkbox"/> > 1 time/year<br><input type="checkbox"/> 1 time/year<br><input type="checkbox"/> < 1 time/year                                                                                                                                                          |
| Future                                                    | <input checked="" type="checkbox"/> For $\geq$ 5 years<br><input type="checkbox"/> between 1 and 5 years<br><input type="checkbox"/> no prospect                                                                                                                                             |
| Quality of performers                                     | <input checked="" type="checkbox"/> Trained, professionals<br><input type="checkbox"/> Trained, non-professionals – training by documentation, volunteers<br><input type="checkbox"/> Uncertain or not -specified                                                                            |
| Quality of data                                           | <input checked="" type="checkbox"/> Standard recording of raw data<br><input type="checkbox"/> Free recording of raw data<br><input type="checkbox"/> Anecdotic                                                                                                                              |
| Analysis                                                  | <input checked="" type="checkbox"/> Reported, verifiable methodology<br><input type="checkbox"/> Reported, unverifiable methodology<br><input type="checkbox"/> Unknown, unverifiable methodology                                                                                            |
| Quality of analysis                                       | <input checked="" type="checkbox"/> Scientifically based<br><input type="checkbox"/> Indicative only<br><input type="checkbox"/> Unknown                                                                                                                                                     |
| <b>REPORTING</b>                                          |                                                                                                                                                                                                                                                                                              |
| Language                                                  | Reporting language(s): Dutch/English                                                                                                                                                                                                                                                         |
| Availability                                              | <input checked="" type="checkbox"/> Scientific publication<br><input checked="" type="checkbox"/> Official report available on the internet or in other public forum<br><input checked="" type="checkbox"/> Official report available from network<br><input type="checkbox"/> Not available |
| Frequency                                                 | <input checked="" type="checkbox"/> $\geq$ 1 time/year – Several reports and publications<br><input type="checkbox"/> < 1 time/year – Reports per species or on local findings; distribution maps                                                                                            |
| Historical reference                                      | <input checked="" type="checkbox"/> over $\geq$ 5 years<br><input type="checkbox"/> between 1 and 5 years<br><input type="checkbox"/> no historical analysis                                                                                                                                 |
| <b>COMMENT(S)</b>                                         |                                                                                                                                                                                                                                                                                              |
| Important network for coordination between organizations. |                                                                                                                                                                                                                                                                                              |

## GSEN-09-0033.00.2 NL – VOFF

| EuropaBio's coordinated approach to General Surveillance: Existing Networks |                                                                                                                                                                                                                                                                                                                                                                                           |                                                                                                                                                                                                                                                                                                                                                                                                                                                                                                                              |                                                                                                                                                                                                                                                                                              |
|-----------------------------------------------------------------------------|-------------------------------------------------------------------------------------------------------------------------------------------------------------------------------------------------------------------------------------------------------------------------------------------------------------------------------------------------------------------------------------------|------------------------------------------------------------------------------------------------------------------------------------------------------------------------------------------------------------------------------------------------------------------------------------------------------------------------------------------------------------------------------------------------------------------------------------------------------------------------------------------------------------------------------|----------------------------------------------------------------------------------------------------------------------------------------------------------------------------------------------------------------------------------------------------------------------------------------------|
| <b>ORGANISATION</b>                                                         |                                                                                                                                                                                                                                                                                                                                                                                           |                                                                                                                                                                                                                                                                                                                                                                                                                                                                                                                              |                                                                                                                                                                                                                                                                                              |
| EuropaBio reference                                                         | GS-EN-09-0034                                                                                                                                                                                                                                                                                                                                                                             |                                                                                                                                                                                                                                                                                                                                                                                                                                                                                                                              |                                                                                                                                                                                                                                                                                              |
| Official name of the Network                                                | Stichting ANalyse, Educatie en Marien Oecologisch ONderzoek                                                                                                                                                                                                                                                                                                                               |                                                                                                                                                                                                                                                                                                                                                                                                                                                                                                                              |                                                                                                                                                                                                                                                                                              |
| Other names                                                                 | Foundation ANEMOON (Acronym for Analysis, Education and Marine Ecology)                                                                                                                                                                                                                                                                                                                   |                                                                                                                                                                                                                                                                                                                                                                                                                                                                                                                              |                                                                                                                                                                                                                                                                                              |
| Type of organisation                                                        | Nature conservation<br>Founded 1993                                                                                                                                                                                                                                                                                                                                                       |                                                                                                                                                                                                                                                                                                                                                                                                                                                                                                                              |                                                                                                                                                                                                                                                                                              |
| Coordinates                                                                 | Postbus 29<br>NL-2120 AA<br>Bennebroek                                                                                                                                                                                                                                                                                                                                                    |                                                                                                                                                                                                                                                                                                                                                                                                                                                                                                                              |                                                                                                                                                                                                                                                                                              |
| Website                                                                     | <a href="http://www.anemoon.org">www.anemoon.org</a>                                                                                                                                                                                                                                                                                                                                      |                                                                                                                                                                                                                                                                                                                                                                                                                                                                                                                              |                                                                                                                                                                                                                                                                                              |
| Funding                                                                     | Donations                                                                                                                                                                                                                                                                                                                                                                                 |                                                                                                                                                                                                                                                                                                                                                                                                                                                                                                                              |                                                                                                                                                                                                                                                                                              |
| Conflict of interest                                                        | -                                                                                                                                                                                                                                                                                                                                                                                         |                                                                                                                                                                                                                                                                                                                                                                                                                                                                                                                              |                                                                                                                                                                                                                                                                                              |
| Part of other network(s)                                                    | Collaboration with<br>VOFF                                                                                                                                                                                                                                                                                                                                                                |                                                                                                                                                                                                                                                                                                                                                                                                                                                                                                                              |                                                                                                                                                                                                                                                                                              |
| Grouping other network(s)                                                   |                                                                                                                                                                                                                                                                                                                                                                                           |                                                                                                                                                                                                                                                                                                                                                                                                                                                                                                                              |                                                                                                                                                                                                                                                                                              |
| <b>MONITORING SUBJECT</b>                                                   |                                                                                                                                                                                                                                                                                                                                                                                           |                                                                                                                                                                                                                                                                                                                                                                                                                                                                                                                              |                                                                                                                                                                                                                                                                                              |
| Description                                                                 | Monitoring and study of the marine habitat in the Netherlands                                                                                                                                                                                                                                                                                                                             |                                                                                                                                                                                                                                                                                                                                                                                                                                                                                                                              |                                                                                                                                                                                                                                                                                              |
| Protection goal(s) and/or influencing factor(s)                             | <input checked="" type="checkbox"/> Protection goal<br><input checked="" type="checkbox"/> Biodiversity: marine fauna<br><input type="checkbox"/> Human Health<br><input type="checkbox"/> Animal Health<br><input type="checkbox"/> Plant Health<br><input type="checkbox"/> Soil function<br><input type="checkbox"/> Water quality<br><input type="checkbox"/> Sustainable Agriculture | <input type="checkbox"/> Influencing factor<br><input type="checkbox"/> Agronomic practice<br><input type="checkbox"/> Plant protection<br><input type="checkbox"/> GMO cultivation<br><input type="checkbox"/> Environmental conditions                                                                                                                                                                                                                                                                                     |                                                                                                                                                                                                                                                                                              |
| Duplication of Farmer's questionnaire                                       | <input checked="" type="checkbox"/> No duplication<br><input type="checkbox"/> Partly duplication<br><input type="checkbox"/> Complete duplication                                                                                                                                                                                                                                        |                                                                                                                                                                                                                                                                                                                                                                                                                                                                                                                              |                                                                                                                                                                                                                                                                                              |
| <b>SPECIFICITY</b>                                                          |                                                                                                                                                                                                                                                                                                                                                                                           |                                                                                                                                                                                                                                                                                                                                                                                                                                                                                                                              |                                                                                                                                                                                                                                                                                              |
| Geography                                                                   | <input type="checkbox"/> EU -wide<br><input type="checkbox"/> Zone A – North<br><input checked="" type="checkbox"/> Zone B – Centre:<br><input type="checkbox"/> Zone C – South                                                                                                                                                                                                           |                                                                                                                                                                                                                                                                                                                                                                                                                                                                                                                              |                                                                                                                                                                                                                                                                                              |
|                                                                             | <input type="checkbox"/> Denmark,<br><input type="checkbox"/> Estonia,<br><input type="checkbox"/> Latvia,<br><input type="checkbox"/> Lithuania,<br><input type="checkbox"/> Finland,<br><input type="checkbox"/> Sweden                                                                                                                                                                 | <input type="checkbox"/> Belgium,<br><input type="checkbox"/> Czech Republic<br><input type="checkbox"/> Germany,<br><input type="checkbox"/> Ireland,<br><input type="checkbox"/> Luxembourg,<br><input type="checkbox"/> Hungary,<br><input checked="" type="checkbox"/> Netherlands,<br><input type="checkbox"/> Austria,<br><input type="checkbox"/> Poland,<br><input type="checkbox"/> Romania,<br><input type="checkbox"/> Slovenia,<br><input type="checkbox"/> Slovakia,<br><input type="checkbox"/> United Kingdom | <input type="checkbox"/> Bulgaria,<br><input type="checkbox"/> Greece,<br><input type="checkbox"/> Spain,<br><input type="checkbox"/> France,<br><input type="checkbox"/> Italy,<br><input type="checkbox"/> Cyprus,<br><input type="checkbox"/> Malta,<br><input type="checkbox"/> Portugal |
|                                                                             | <input type="checkbox"/> Regional (specify)<br><input type="checkbox"/> Local (specify)                                                                                                                                                                                                                                                                                                   |                                                                                                                                                                                                                                                                                                                                                                                                                                                                                                                              |                                                                                                                                                                                                                                                                                              |
| Factors                                                                     | <input checked="" type="checkbox"/> Multiple species/items (specify):<br><input type="checkbox"/> Single species/item (specify)                                                                                                                                                                                                                                                           |                                                                                                                                                                                                                                                                                                                                                                                                                                                                                                                              |                                                                                                                                                                                                                                                                                              |
| Crop                                                                        | <input checked="" type="checkbox"/> No specific crop(s)<br><input type="checkbox"/> Several crops (e.g. all cereals)<br><input type="checkbox"/> Single crop                                                                                                                                                                                                                              |                                                                                                                                                                                                                                                                                                                                                                                                                                                                                                                              |                                                                                                                                                                                                                                                                                              |
| Trait /treatment                                                            | <input checked="" type="checkbox"/> No specific traits/treatments<br><input type="checkbox"/> Several traits/treatments<br><input type="checkbox"/> Single trait/treatment                                                                                                                                                                                                                |                                                                                                                                                                                                                                                                                                                                                                                                                                                                                                                              |                                                                                                                                                                                                                                                                                              |
| GMO                                                                         | <input checked="" type="checkbox"/> No GMO bias<br><input type="checkbox"/> GMO specific                                                                                                                                                                                                                                                                                                  |                                                                                                                                                                                                                                                                                                                                                                                                                                                                                                                              |                                                                                                                                                                                                                                                                                              |
| <b>METHODOLOGY</b>                                                          |                                                                                                                                                                                                                                                                                                                                                                                           |                                                                                                                                                                                                                                                                                                                                                                                                                                                                                                                              |                                                                                                                                                                                                                                                                                              |
| Observations                                                                | <input checked="" type="checkbox"/> Reported, verifiable methodology<br><input type="checkbox"/> Reported, unverifiable methodology<br><input type="checkbox"/> Unknown, unverifiable methodology                                                                                                                                                                                         |                                                                                                                                                                                                                                                                                                                                                                                                                                                                                                                              |                                                                                                                                                                                                                                                                                              |

|                           |                                                                                                                                                                                                                                                                        |
|---------------------------|------------------------------------------------------------------------------------------------------------------------------------------------------------------------------------------------------------------------------------------------------------------------|
| Frequency                 | <input checked="" type="checkbox"/> > 1 time/year<br><input type="checkbox"/> 1 time/year<br><input type="checkbox"/> < 1 time/year                                                                                                                                    |
| Future                    | <input checked="" type="checkbox"/> For $\geq$ 5 years<br><input type="checkbox"/> between 1 and 5 years<br><input type="checkbox"/> no prospect                                                                                                                       |
| Quality of performers     | <input type="checkbox"/> Trained, professionals<br><input checked="" type="checkbox"/> Trained, non-professionals – training by documentation, volunteers<br><input type="checkbox"/> Uncertain or not -specified                                                      |
| Quality of data           | <input checked="" type="checkbox"/> Standard recording of raw data<br><input type="checkbox"/> Free recording of raw data<br><input type="checkbox"/> Anecdotic                                                                                                        |
| Analysis                  | <input checked="" type="checkbox"/> Reported, verifiable methodology<br><input type="checkbox"/> Reported, unverifiable methodology<br><input type="checkbox"/> Unknown, unverifiable methodology                                                                      |
| Quality of analysis       | <input checked="" type="checkbox"/> Scientifically based<br><input type="checkbox"/> Indicative only<br><input type="checkbox"/> Unknown                                                                                                                               |
| <b>REPORTING</b>          |                                                                                                                                                                                                                                                                        |
| Language                  | Reporting language(s): Dutch                                                                                                                                                                                                                                           |
| Availability              | <input type="checkbox"/> Scientific publication<br><input checked="" type="checkbox"/> Official report available on the internet or in other public forum<br><input type="checkbox"/> Official report available from network<br><input type="checkbox"/> Not available |
| Frequency                 | <input type="checkbox"/> $\geq$ 1 time/year<br><input type="checkbox"/> < 1 time/year – Reports per species                                                                                                                                                            |
| Historical reference      | <input checked="" type="checkbox"/> over $\geq$ 5 years<br><input type="checkbox"/> between 1 and 5 years<br><input type="checkbox"/> no historical analysis                                                                                                           |
| <b>COMMENT(S)</b>         |                                                                                                                                                                                                                                                                        |
| Formal monitoring network |                                                                                                                                                                                                                                                                        |

**GSEN-09-0035.00.1 NL – BLWG**

| <b>EuropaBio's coordinated approach to General Surveillance: Existing Networks</b> |                                                                                                                                                                                                                                                                                                                                                                                            |                                                                                                                                                                                                                                                                                                                                                                                                                                                                                                                              |                                                                                                                                                                                                                                                                                              |
|------------------------------------------------------------------------------------|--------------------------------------------------------------------------------------------------------------------------------------------------------------------------------------------------------------------------------------------------------------------------------------------------------------------------------------------------------------------------------------------|------------------------------------------------------------------------------------------------------------------------------------------------------------------------------------------------------------------------------------------------------------------------------------------------------------------------------------------------------------------------------------------------------------------------------------------------------------------------------------------------------------------------------|----------------------------------------------------------------------------------------------------------------------------------------------------------------------------------------------------------------------------------------------------------------------------------------------|
| <b>ORGANISATION</b>                                                                |                                                                                                                                                                                                                                                                                                                                                                                            |                                                                                                                                                                                                                                                                                                                                                                                                                                                                                                                              |                                                                                                                                                                                                                                                                                              |
| EuropaBio reference                                                                | GS-EN-09-0035                                                                                                                                                                                                                                                                                                                                                                              |                                                                                                                                                                                                                                                                                                                                                                                                                                                                                                                              |                                                                                                                                                                                                                                                                                              |
| Official name of the Network                                                       | <b>Bryologische en Lichenologische Werkgroep van de KNNV</b>                                                                                                                                                                                                                                                                                                                               |                                                                                                                                                                                                                                                                                                                                                                                                                                                                                                                              |                                                                                                                                                                                                                                                                                              |
| Other names                                                                        | Bryology and Lichenology Working group (BLWG)                                                                                                                                                                                                                                                                                                                                              |                                                                                                                                                                                                                                                                                                                                                                                                                                                                                                                              |                                                                                                                                                                                                                                                                                              |
| Type of organisation                                                               | Nature conservation<br>Founded 1946                                                                                                                                                                                                                                                                                                                                                        |                                                                                                                                                                                                                                                                                                                                                                                                                                                                                                                              |                                                                                                                                                                                                                                                                                              |
| Coordinates                                                                        | De Kievit 21<br>3921 CX<br>Elst UT                                                                                                                                                                                                                                                                                                                                                         |                                                                                                                                                                                                                                                                                                                                                                                                                                                                                                                              |                                                                                                                                                                                                                                                                                              |
| Website                                                                            | <a href="http://www.blwg.org">www.blwg.org</a>                                                                                                                                                                                                                                                                                                                                             |                                                                                                                                                                                                                                                                                                                                                                                                                                                                                                                              |                                                                                                                                                                                                                                                                                              |
| Funding                                                                            | Membership                                                                                                                                                                                                                                                                                                                                                                                 |                                                                                                                                                                                                                                                                                                                                                                                                                                                                                                                              |                                                                                                                                                                                                                                                                                              |
| Conflict of interest                                                               | -                                                                                                                                                                                                                                                                                                                                                                                          |                                                                                                                                                                                                                                                                                                                                                                                                                                                                                                                              |                                                                                                                                                                                                                                                                                              |
| Part of other network(s)                                                           | Collaboration with<br>VOFF                                                                                                                                                                                                                                                                                                                                                                 |                                                                                                                                                                                                                                                                                                                                                                                                                                                                                                                              |                                                                                                                                                                                                                                                                                              |
| Grouping other network(s)                                                          | regional working groups                                                                                                                                                                                                                                                                                                                                                                    |                                                                                                                                                                                                                                                                                                                                                                                                                                                                                                                              |                                                                                                                                                                                                                                                                                              |
| <b>MONITORING SUBJECT</b>                                                          |                                                                                                                                                                                                                                                                                                                                                                                            |                                                                                                                                                                                                                                                                                                                                                                                                                                                                                                                              |                                                                                                                                                                                                                                                                                              |
| Description                                                                        | Botanical monitoring in the Netherlands, 2 national networks: mosses and lichens                                                                                                                                                                                                                                                                                                           |                                                                                                                                                                                                                                                                                                                                                                                                                                                                                                                              |                                                                                                                                                                                                                                                                                              |
| Protection goal(s) and/or influencing factor(s)                                    | <input checked="" type="checkbox"/> Protection goal<br><input checked="" type="checkbox"/> Biodiversity: plants, fungi<br><input type="checkbox"/> Human Health<br><input type="checkbox"/> Animal Health<br><input type="checkbox"/> Plant Health<br><input type="checkbox"/> Soil function<br><input type="checkbox"/> Water quality<br><input type="checkbox"/> Sustainable Agriculture | <input type="checkbox"/> Influencing factor<br><input type="checkbox"/> Agronomic practice<br><input type="checkbox"/> Plant protection<br><input type="checkbox"/> GMO cultivation<br><input type="checkbox"/> Environmental conditions                                                                                                                                                                                                                                                                                     |                                                                                                                                                                                                                                                                                              |
| Duplication of Farmer's questionnaire                                              | <input checked="" type="checkbox"/> No duplication<br><input type="checkbox"/> Partly duplication<br><input type="checkbox"/> Complete duplication                                                                                                                                                                                                                                         |                                                                                                                                                                                                                                                                                                                                                                                                                                                                                                                              |                                                                                                                                                                                                                                                                                              |
| <b>SPECIFICITY</b>                                                                 |                                                                                                                                                                                                                                                                                                                                                                                            |                                                                                                                                                                                                                                                                                                                                                                                                                                                                                                                              |                                                                                                                                                                                                                                                                                              |
| Geography                                                                          | <input type="checkbox"/> EU -wide<br><input type="checkbox"/> Zone A – North<br><input checked="" type="checkbox"/> Zone B – Centre:<br><input type="checkbox"/> Zone C – South                                                                                                                                                                                                            |                                                                                                                                                                                                                                                                                                                                                                                                                                                                                                                              |                                                                                                                                                                                                                                                                                              |
|                                                                                    | <input type="checkbox"/> Denmark,<br><input type="checkbox"/> Estonia,<br><input type="checkbox"/> Latvia,<br><input type="checkbox"/> Lithuania,<br><input type="checkbox"/> Finland,<br><input type="checkbox"/> Sweden                                                                                                                                                                  | <input type="checkbox"/> Belgium,<br><input type="checkbox"/> Czech Republic<br><input type="checkbox"/> Germany,<br><input type="checkbox"/> Ireland,<br><input type="checkbox"/> Luxembourg,<br><input type="checkbox"/> Hungary,<br><input checked="" type="checkbox"/> Netherlands,<br><input type="checkbox"/> Austria,<br><input type="checkbox"/> Poland,<br><input type="checkbox"/> Romania,<br><input type="checkbox"/> Slovenia,<br><input type="checkbox"/> Slovakia,<br><input type="checkbox"/> United Kingdom | <input type="checkbox"/> Bulgaria,<br><input type="checkbox"/> Greece,<br><input type="checkbox"/> Spain,<br><input type="checkbox"/> France,<br><input type="checkbox"/> Italy,<br><input type="checkbox"/> Cyprus,<br><input type="checkbox"/> Malta,<br><input type="checkbox"/> Portugal |
|                                                                                    | <input type="checkbox"/> Regional (specify)<br><input type="checkbox"/> Local (specify)                                                                                                                                                                                                                                                                                                    |                                                                                                                                                                                                                                                                                                                                                                                                                                                                                                                              |                                                                                                                                                                                                                                                                                              |
| Factors                                                                            | <input checked="" type="checkbox"/> Multiple species/items (specify): mosses and lichen<br><input type="checkbox"/> Single species/item (specify)                                                                                                                                                                                                                                          |                                                                                                                                                                                                                                                                                                                                                                                                                                                                                                                              |                                                                                                                                                                                                                                                                                              |
| Crop                                                                               | <input checked="" type="checkbox"/> No specific crop(s)<br><input type="checkbox"/> Several crops (e.g. all cereals)<br><input type="checkbox"/> Single crop                                                                                                                                                                                                                               |                                                                                                                                                                                                                                                                                                                                                                                                                                                                                                                              |                                                                                                                                                                                                                                                                                              |
| Trait /treatment                                                                   | <input checked="" type="checkbox"/> No specific traits/treatments<br><input type="checkbox"/> Several traits/treatments<br><input type="checkbox"/> Single trait/treatment                                                                                                                                                                                                                 |                                                                                                                                                                                                                                                                                                                                                                                                                                                                                                                              |                                                                                                                                                                                                                                                                                              |
| GMO                                                                                | <input checked="" type="checkbox"/> No GMO bias<br><input type="checkbox"/> GMO specific                                                                                                                                                                                                                                                                                                   |                                                                                                                                                                                                                                                                                                                                                                                                                                                                                                                              |                                                                                                                                                                                                                                                                                              |
| <b>METHODOLOGY</b>                                                                 |                                                                                                                                                                                                                                                                                                                                                                                            |                                                                                                                                                                                                                                                                                                                                                                                                                                                                                                                              |                                                                                                                                                                                                                                                                                              |
| Observations                                                                       | <input checked="" type="checkbox"/> Reported, verifiable methodology<br><input type="checkbox"/> Reported, unverifiable methodology<br><input type="checkbox"/> Unknown, unverifiable methodology                                                                                                                                                                                          |                                                                                                                                                                                                                                                                                                                                                                                                                                                                                                                              |                                                                                                                                                                                                                                                                                              |

|                           |                                                                                                                                                                                                                                                                        |
|---------------------------|------------------------------------------------------------------------------------------------------------------------------------------------------------------------------------------------------------------------------------------------------------------------|
| Frequency                 | <input type="checkbox"/> > 1 time/year<br><input type="checkbox"/> 1 time/year<br><input checked="" type="checkbox"/> < 1 time/year                                                                                                                                    |
| Future                    | <input checked="" type="checkbox"/> For $\geq$ 5 years<br><input type="checkbox"/> between 1 and 5 years<br><input type="checkbox"/> no prospect                                                                                                                       |
| Quality of performers     | <input type="checkbox"/> Trained, professionals<br><input checked="" type="checkbox"/> Trained, non-professionals – training by documentation, volunteers<br><input type="checkbox"/> Uncertain or not -specified                                                      |
| Quality of data           | <input checked="" type="checkbox"/> Standard recording of raw data<br><input type="checkbox"/> Free recording of raw data<br><input type="checkbox"/> Anecdotic                                                                                                        |
| Analysis                  | <input checked="" type="checkbox"/> Reported, verifiable methodology<br><input type="checkbox"/> Reported, unverifiable methodology<br><input type="checkbox"/> Unknown, unverifiable methodology                                                                      |
| Quality of analysis       | <input checked="" type="checkbox"/> Scientifically based<br><input type="checkbox"/> Indicative only<br><input type="checkbox"/> Unknown                                                                                                                               |
| <b>REPORTING</b>          |                                                                                                                                                                                                                                                                        |
| Language                  | Reporting language(s): Dutch                                                                                                                                                                                                                                           |
| Availability              | <input type="checkbox"/> Scientific publication<br><input checked="" type="checkbox"/> Official report available on the internet or in other public forum<br><input type="checkbox"/> Official report available from network<br><input type="checkbox"/> Not available |
| Frequency                 | <input type="checkbox"/> $\geq$ 1 time/year<br><input type="checkbox"/> < 1 time/year – Reports per monitoring area                                                                                                                                                    |
| Historical reference      | <input checked="" type="checkbox"/> over $\geq$ 5 years<br><input type="checkbox"/> between 1 and 5 years<br><input type="checkbox"/> no historical analysis                                                                                                           |
| <b>COMMENT(S)</b>         |                                                                                                                                                                                                                                                                        |
| Formal monitoring network |                                                                                                                                                                                                                                                                        |

## GSEN-09-0036.00.2 NL – FLORON

| EuropaBio's coordinated approach to General Surveillance: Existing Networks |                                                                                                                                                                                                                                                                                                                              |                                                                                                                                                                                                                                                                                                                                                                                                                                                                                                                              |                                                                                                                                                                                                                                                                                              |
|-----------------------------------------------------------------------------|------------------------------------------------------------------------------------------------------------------------------------------------------------------------------------------------------------------------------------------------------------------------------------------------------------------------------|------------------------------------------------------------------------------------------------------------------------------------------------------------------------------------------------------------------------------------------------------------------------------------------------------------------------------------------------------------------------------------------------------------------------------------------------------------------------------------------------------------------------------|----------------------------------------------------------------------------------------------------------------------------------------------------------------------------------------------------------------------------------------------------------------------------------------------|
| <b>ORGANISATION</b>                                                         |                                                                                                                                                                                                                                                                                                                              |                                                                                                                                                                                                                                                                                                                                                                                                                                                                                                                              |                                                                                                                                                                                                                                                                                              |
| EuropaBio reference                                                         | GS-EN-09-0036                                                                                                                                                                                                                                                                                                                |                                                                                                                                                                                                                                                                                                                                                                                                                                                                                                                              |                                                                                                                                                                                                                                                                                              |
| Official name of the Network                                                | Stichting Floristisch Onderzoek Nederland                                                                                                                                                                                                                                                                                    |                                                                                                                                                                                                                                                                                                                                                                                                                                                                                                                              |                                                                                                                                                                                                                                                                                              |
| Other names                                                                 | Foundation FLORON                                                                                                                                                                                                                                                                                                            |                                                                                                                                                                                                                                                                                                                                                                                                                                                                                                                              |                                                                                                                                                                                                                                                                                              |
| Type of organisation                                                        | Nature conservation<br>Founded (unknown)                                                                                                                                                                                                                                                                                     |                                                                                                                                                                                                                                                                                                                                                                                                                                                                                                                              |                                                                                                                                                                                                                                                                                              |
| Coordinates                                                                 | Postbus 9514<br>2300 RA Leiden                                                                                                                                                                                                                                                                                               |                                                                                                                                                                                                                                                                                                                                                                                                                                                                                                                              |                                                                                                                                                                                                                                                                                              |
| Website                                                                     | <a href="http://floron[at]floron.leidenuniv.nl">floron[at]floron.leidenuniv.nl</a>                                                                                                                                                                                                                                           |                                                                                                                                                                                                                                                                                                                                                                                                                                                                                                                              |                                                                                                                                                                                                                                                                                              |
| Funding                                                                     | Unknown                                                                                                                                                                                                                                                                                                                      |                                                                                                                                                                                                                                                                                                                                                                                                                                                                                                                              |                                                                                                                                                                                                                                                                                              |
| Conflict of interest                                                        | -                                                                                                                                                                                                                                                                                                                            |                                                                                                                                                                                                                                                                                                                                                                                                                                                                                                                              |                                                                                                                                                                                                                                                                                              |
| Part of other network(s)                                                    | Collaboration with<br>VOFF                                                                                                                                                                                                                                                                                                   |                                                                                                                                                                                                                                                                                                                                                                                                                                                                                                                              |                                                                                                                                                                                                                                                                                              |
| Grouping other network(s)                                                   | 24 regional divisions                                                                                                                                                                                                                                                                                                        |                                                                                                                                                                                                                                                                                                                                                                                                                                                                                                                              |                                                                                                                                                                                                                                                                                              |
| <b>MONITORING SUBJECT</b>                                                   |                                                                                                                                                                                                                                                                                                                              |                                                                                                                                                                                                                                                                                                                                                                                                                                                                                                                              |                                                                                                                                                                                                                                                                                              |
| Description                                                                 | Botanical monitoring in the Netherlands                                                                                                                                                                                                                                                                                      |                                                                                                                                                                                                                                                                                                                                                                                                                                                                                                                              |                                                                                                                                                                                                                                                                                              |
| Protection goal(s) and/or influencing factor(s)                             | <input checked="" type="checkbox"/> Protection goal                                                                                                                                                                                                                                                                          | <input type="checkbox"/> Influencing factor                                                                                                                                                                                                                                                                                                                                                                                                                                                                                  |                                                                                                                                                                                                                                                                                              |
|                                                                             | <input checked="" type="checkbox"/> Biodiversity: Plants<br><input type="checkbox"/> Human Health<br><input type="checkbox"/> Animal Health<br><input type="checkbox"/> Plant Health<br><input type="checkbox"/> Soil function<br><input type="checkbox"/> Water quality<br><input type="checkbox"/> Sustainable Agriculture | <input type="checkbox"/> Agronomic practice<br><input type="checkbox"/> Plant protection<br><input type="checkbox"/> GMO cultivation<br><input type="checkbox"/> Environmental conditions                                                                                                                                                                                                                                                                                                                                    |                                                                                                                                                                                                                                                                                              |
| Duplication of Farmer's questionnaire                                       | <input checked="" type="checkbox"/> No duplication<br><input type="checkbox"/> Partly duplication<br><input type="checkbox"/> Complete duplication                                                                                                                                                                           |                                                                                                                                                                                                                                                                                                                                                                                                                                                                                                                              |                                                                                                                                                                                                                                                                                              |
| <b>SPECIFICITY</b>                                                          |                                                                                                                                                                                                                                                                                                                              |                                                                                                                                                                                                                                                                                                                                                                                                                                                                                                                              |                                                                                                                                                                                                                                                                                              |
| Geography                                                                   | <input type="checkbox"/> EU -wide                                                                                                                                                                                                                                                                                            |                                                                                                                                                                                                                                                                                                                                                                                                                                                                                                                              |                                                                                                                                                                                                                                                                                              |
|                                                                             | <input type="checkbox"/> Zone A – North                                                                                                                                                                                                                                                                                      | <input checked="" type="checkbox"/> Zone B – Centre:                                                                                                                                                                                                                                                                                                                                                                                                                                                                         | <input type="checkbox"/> Zone C – South                                                                                                                                                                                                                                                      |
|                                                                             | <input type="checkbox"/> Denmark,<br><input type="checkbox"/> Estonia,<br><input type="checkbox"/> Latvia,<br><input type="checkbox"/> Lithuania,<br><input type="checkbox"/> Finland,<br><input type="checkbox"/> Sweden                                                                                                    | <input type="checkbox"/> Belgium,<br><input type="checkbox"/> Czech Republic<br><input type="checkbox"/> Germany,<br><input type="checkbox"/> Ireland,<br><input type="checkbox"/> Luxembourg,<br><input type="checkbox"/> Hungary,<br><input checked="" type="checkbox"/> Netherlands,<br><input type="checkbox"/> Austria,<br><input type="checkbox"/> Poland,<br><input type="checkbox"/> Romania,<br><input type="checkbox"/> Slovenia,<br><input type="checkbox"/> Slovakia,<br><input type="checkbox"/> United Kingdom | <input type="checkbox"/> Bulgaria,<br><input type="checkbox"/> Greece,<br><input type="checkbox"/> Spain,<br><input type="checkbox"/> France,<br><input type="checkbox"/> Italy,<br><input type="checkbox"/> Cyprus,<br><input type="checkbox"/> Malta,<br><input type="checkbox"/> Portugal |
|                                                                             | <input type="checkbox"/> Regional (specify)<br><input type="checkbox"/> Local (specify)                                                                                                                                                                                                                                      |                                                                                                                                                                                                                                                                                                                                                                                                                                                                                                                              |                                                                                                                                                                                                                                                                                              |
| Factors                                                                     | <input checked="" type="checkbox"/> Multiple species/items (specify): higher plants<br><input type="checkbox"/> Single species/item (specify)                                                                                                                                                                                |                                                                                                                                                                                                                                                                                                                                                                                                                                                                                                                              |                                                                                                                                                                                                                                                                                              |
| Crop                                                                        | <input checked="" type="checkbox"/> No specific crop(s)<br><input type="checkbox"/> Several crops (e.g. all cereals)<br><input type="checkbox"/> Single crop                                                                                                                                                                 |                                                                                                                                                                                                                                                                                                                                                                                                                                                                                                                              |                                                                                                                                                                                                                                                                                              |
| Trait /treatment                                                            | <input checked="" type="checkbox"/> No specific traits/treatments<br><input type="checkbox"/> Several traits/treatments<br><input type="checkbox"/> Single trait/treatment                                                                                                                                                   |                                                                                                                                                                                                                                                                                                                                                                                                                                                                                                                              |                                                                                                                                                                                                                                                                                              |
| GMO                                                                         | <input checked="" type="checkbox"/> No GMO bias<br><input type="checkbox"/> GMO specific                                                                                                                                                                                                                                     |                                                                                                                                                                                                                                                                                                                                                                                                                                                                                                                              |                                                                                                                                                                                                                                                                                              |
| <b>METHODOLOGY</b>                                                          |                                                                                                                                                                                                                                                                                                                              |                                                                                                                                                                                                                                                                                                                                                                                                                                                                                                                              |                                                                                                                                                                                                                                                                                              |
| Observations                                                                | <input checked="" type="checkbox"/> Reported, verifiable methodology<br><input type="checkbox"/> Reported, unverifiable methodology<br><input type="checkbox"/> Unknown, unverifiable methodology                                                                                                                            |                                                                                                                                                                                                                                                                                                                                                                                                                                                                                                                              |                                                                                                                                                                                                                                                                                              |

|                                                                                               |                                                                                                                                                                                                                                                                                   |
|-----------------------------------------------------------------------------------------------|-----------------------------------------------------------------------------------------------------------------------------------------------------------------------------------------------------------------------------------------------------------------------------------|
| Frequency                                                                                     | <input checked="" type="checkbox"/> > 1 time/year<br><input type="checkbox"/> 1 time/year<br><input type="checkbox"/> < 1 time/year                                                                                                                                               |
| Future                                                                                        | <input checked="" type="checkbox"/> For $\geq$ 5 years<br><input type="checkbox"/> between 1 and 5 years<br><input type="checkbox"/> no prospect                                                                                                                                  |
| Quality of performers                                                                         | <input type="checkbox"/> Trained, professionals<br><input checked="" type="checkbox"/> Trained, non-professionals – training by documentation, volunteers<br><input type="checkbox"/> Uncertain or not -specified                                                                 |
| Quality of data                                                                               | <input checked="" type="checkbox"/> Standard recording of raw data<br><input type="checkbox"/> Free recording of raw data<br><input type="checkbox"/> Anecdotic                                                                                                                   |
| Analysis                                                                                      | <input checked="" type="checkbox"/> Reported, verifiable methodology<br><input type="checkbox"/> Reported, unverifiable methodology<br><input type="checkbox"/> Unknown, unverifiable methodology                                                                                 |
| Quality of analysis                                                                           | <input checked="" type="checkbox"/> Scientifically based<br><input type="checkbox"/> Indicative only<br><input type="checkbox"/> Unknown                                                                                                                                          |
| <b>REPORTING</b>                                                                              |                                                                                                                                                                                                                                                                                   |
| Language                                                                                      | Reporting language(s): Dutch/English                                                                                                                                                                                                                                              |
| Availability                                                                                  | <input checked="" type="checkbox"/> Scientific publication<br><input checked="" type="checkbox"/> Official report available on the internet or in other public forum<br><input type="checkbox"/> Official report available from network<br><input type="checkbox"/> Not available |
| Frequency                                                                                     | <input checked="" type="checkbox"/> $\geq$ 1 time/year – Newsletters<br><input type="checkbox"/> < 1 time/year – Reports per species or on local findings; distribution maps                                                                                                      |
| Historical reference                                                                          | <input checked="" type="checkbox"/> over $\geq$ 5 years<br><input type="checkbox"/> between 1 and 5 years<br><input type="checkbox"/> no historical analysis                                                                                                                      |
| <b>COMMENT(S)</b>                                                                             |                                                                                                                                                                                                                                                                                   |
| Formal monitoring network. Newsletters, distribution maps, with limited access (paid service) |                                                                                                                                                                                                                                                                                   |



**GSEN-09-0037.00.1 NL – NMV**

| <b>EuropaBio's coordinated approach to General Surveillance: Existing Networks</b> |                                                                                                                                                                                                                                                                                                                                                                                    |                                                                                                                                                                                                                                                                                                                                                                                                                                                                                                                              |                                                                                                                                                                                                                                                                                              |
|------------------------------------------------------------------------------------|------------------------------------------------------------------------------------------------------------------------------------------------------------------------------------------------------------------------------------------------------------------------------------------------------------------------------------------------------------------------------------|------------------------------------------------------------------------------------------------------------------------------------------------------------------------------------------------------------------------------------------------------------------------------------------------------------------------------------------------------------------------------------------------------------------------------------------------------------------------------------------------------------------------------|----------------------------------------------------------------------------------------------------------------------------------------------------------------------------------------------------------------------------------------------------------------------------------------------|
| <b>ORGANISATION</b>                                                                |                                                                                                                                                                                                                                                                                                                                                                                    |                                                                                                                                                                                                                                                                                                                                                                                                                                                                                                                              |                                                                                                                                                                                                                                                                                              |
| EuropaBio reference                                                                | GS-EN-09-0037                                                                                                                                                                                                                                                                                                                                                                      |                                                                                                                                                                                                                                                                                                                                                                                                                                                                                                                              |                                                                                                                                                                                                                                                                                              |
| Official name of the Network                                                       | <b>Nederlandse Mycologische Vereniging</b>                                                                                                                                                                                                                                                                                                                                         |                                                                                                                                                                                                                                                                                                                                                                                                                                                                                                                              |                                                                                                                                                                                                                                                                                              |
| Other names                                                                        | NMV                                                                                                                                                                                                                                                                                                                                                                                |                                                                                                                                                                                                                                                                                                                                                                                                                                                                                                                              |                                                                                                                                                                                                                                                                                              |
| Type of organisation                                                               | Nature conservation<br>Founded 1908                                                                                                                                                                                                                                                                                                                                                |                                                                                                                                                                                                                                                                                                                                                                                                                                                                                                                              |                                                                                                                                                                                                                                                                                              |
| Coordinates                                                                        | Secretariaat NMV<br>Reelaan 13<br>7522 LR Enschede                                                                                                                                                                                                                                                                                                                                 |                                                                                                                                                                                                                                                                                                                                                                                                                                                                                                                              |                                                                                                                                                                                                                                                                                              |
| Website                                                                            | <a href="http://www.mycologen.nl/">http://www.mycologen.nl/</a>                                                                                                                                                                                                                                                                                                                    |                                                                                                                                                                                                                                                                                                                                                                                                                                                                                                                              |                                                                                                                                                                                                                                                                                              |
| Funding                                                                            | Membership                                                                                                                                                                                                                                                                                                                                                                         |                                                                                                                                                                                                                                                                                                                                                                                                                                                                                                                              |                                                                                                                                                                                                                                                                                              |
| Conflict of interest                                                               | -                                                                                                                                                                                                                                                                                                                                                                                  |                                                                                                                                                                                                                                                                                                                                                                                                                                                                                                                              |                                                                                                                                                                                                                                                                                              |
| Part of other network(s)                                                           | Collaboration with<br>VOFF                                                                                                                                                                                                                                                                                                                                                         |                                                                                                                                                                                                                                                                                                                                                                                                                                                                                                                              |                                                                                                                                                                                                                                                                                              |
| Grouping other network(s)                                                          | regional working groups                                                                                                                                                                                                                                                                                                                                                            |                                                                                                                                                                                                                                                                                                                                                                                                                                                                                                                              |                                                                                                                                                                                                                                                                                              |
| <b>MONITORING SUBJECT</b>                                                          |                                                                                                                                                                                                                                                                                                                                                                                    |                                                                                                                                                                                                                                                                                                                                                                                                                                                                                                                              |                                                                                                                                                                                                                                                                                              |
| Description                                                                        | Monitoring and promoting knowledge of fungi in the Netherlands                                                                                                                                                                                                                                                                                                                     |                                                                                                                                                                                                                                                                                                                                                                                                                                                                                                                              |                                                                                                                                                                                                                                                                                              |
| Protection goal(s) and/or influencing factor(s)                                    | <input checked="" type="checkbox"/> Protection goal<br><input checked="" type="checkbox"/> Biodiversity: fungi<br><input type="checkbox"/> Human Health<br><input type="checkbox"/> Animal Health<br><input type="checkbox"/> Plant Health<br><input type="checkbox"/> Soil function<br><input type="checkbox"/> Water quality<br><input type="checkbox"/> Sustainable Agriculture | <input type="checkbox"/> Influencing factor<br><input type="checkbox"/> Agronomic practice<br><input type="checkbox"/> Plant protection<br><input type="checkbox"/> GMO cultivation<br><input type="checkbox"/> Environmental conditions                                                                                                                                                                                                                                                                                     |                                                                                                                                                                                                                                                                                              |
| Duplication of Farmer's questionnaire                                              | <input checked="" type="checkbox"/> No duplication<br><input type="checkbox"/> Partly duplication<br><input type="checkbox"/> Complete duplication                                                                                                                                                                                                                                 |                                                                                                                                                                                                                                                                                                                                                                                                                                                                                                                              |                                                                                                                                                                                                                                                                                              |
| <b>SPECIFICITY</b>                                                                 |                                                                                                                                                                                                                                                                                                                                                                                    |                                                                                                                                                                                                                                                                                                                                                                                                                                                                                                                              |                                                                                                                                                                                                                                                                                              |
| Geography                                                                          | <input type="checkbox"/> EU -wide<br><input type="checkbox"/> Zone A – North<br><input checked="" type="checkbox"/> Zone B – Centre:<br><input type="checkbox"/> Zone C – South                                                                                                                                                                                                    |                                                                                                                                                                                                                                                                                                                                                                                                                                                                                                                              |                                                                                                                                                                                                                                                                                              |
|                                                                                    | <input type="checkbox"/> Denmark,<br><input type="checkbox"/> Estonia,<br><input type="checkbox"/> Latvia,<br><input type="checkbox"/> Lithuania,<br><input type="checkbox"/> Finland,<br><input type="checkbox"/> Sweden                                                                                                                                                          | <input type="checkbox"/> Belgium,<br><input type="checkbox"/> Czech Republic<br><input type="checkbox"/> Germany,<br><input type="checkbox"/> Ireland,<br><input type="checkbox"/> Luxembourg,<br><input type="checkbox"/> Hungary,<br><input checked="" type="checkbox"/> Netherlands,<br><input type="checkbox"/> Austria,<br><input type="checkbox"/> Poland,<br><input type="checkbox"/> Romania,<br><input type="checkbox"/> Slovenia,<br><input type="checkbox"/> Slovakia,<br><input type="checkbox"/> United Kingdom | <input type="checkbox"/> Bulgaria,<br><input type="checkbox"/> Greece,<br><input type="checkbox"/> Spain,<br><input type="checkbox"/> France,<br><input type="checkbox"/> Italy,<br><input type="checkbox"/> Cyprus,<br><input type="checkbox"/> Malta,<br><input type="checkbox"/> Portugal |
|                                                                                    | <input type="checkbox"/> Regional (specify)<br><input type="checkbox"/> Local (specify)                                                                                                                                                                                                                                                                                            |                                                                                                                                                                                                                                                                                                                                                                                                                                                                                                                              |                                                                                                                                                                                                                                                                                              |
| Factors                                                                            | <input checked="" type="checkbox"/> Multiple species/items (specify): fungi<br><input type="checkbox"/> Single species/item (specify)                                                                                                                                                                                                                                              |                                                                                                                                                                                                                                                                                                                                                                                                                                                                                                                              |                                                                                                                                                                                                                                                                                              |
| Crop                                                                               | <input checked="" type="checkbox"/> No specific crop(s)<br><input type="checkbox"/> Several crops (e.g. all cereals)<br><input type="checkbox"/> Single crop                                                                                                                                                                                                                       |                                                                                                                                                                                                                                                                                                                                                                                                                                                                                                                              |                                                                                                                                                                                                                                                                                              |
| Trait /treatment                                                                   | <input checked="" type="checkbox"/> No specific traits/treatments<br><input type="checkbox"/> Several traits/treatments<br><input type="checkbox"/> Single trait/treatment                                                                                                                                                                                                         |                                                                                                                                                                                                                                                                                                                                                                                                                                                                                                                              |                                                                                                                                                                                                                                                                                              |
| GMO                                                                                | <input checked="" type="checkbox"/> No GMO bias<br><input type="checkbox"/> GMO specific                                                                                                                                                                                                                                                                                           |                                                                                                                                                                                                                                                                                                                                                                                                                                                                                                                              |                                                                                                                                                                                                                                                                                              |
| <b>METHODOLOGY</b>                                                                 |                                                                                                                                                                                                                                                                                                                                                                                    |                                                                                                                                                                                                                                                                                                                                                                                                                                                                                                                              |                                                                                                                                                                                                                                                                                              |
| Observations                                                                       | <input checked="" type="checkbox"/> Reported, verifiable methodology<br><input type="checkbox"/> Reported, unverifiable methodology<br><input type="checkbox"/> Unknown, unverifiable methodology                                                                                                                                                                                  |                                                                                                                                                                                                                                                                                                                                                                                                                                                                                                                              |                                                                                                                                                                                                                                                                                              |

|                            |                                                                                                                                                                                                                                                                        |
|----------------------------|------------------------------------------------------------------------------------------------------------------------------------------------------------------------------------------------------------------------------------------------------------------------|
| Frequency                  | <input type="checkbox"/> > 1 time/year<br><input type="checkbox"/> 1 time/year<br><input checked="" type="checkbox"/> < 1 time/year                                                                                                                                    |
| Future                     | <input checked="" type="checkbox"/> For $\geq 5$ years<br><input type="checkbox"/> between 1 and 5 years<br><input type="checkbox"/> no prospect                                                                                                                       |
| Quality of performers      | <input checked="" type="checkbox"/> Trained, professionals<br><input checked="" type="checkbox"/> Trained, non-professionals – training by documentation, volunteers<br><input type="checkbox"/> Uncertain or not -specified                                           |
| Quality of data            | <input checked="" type="checkbox"/> Standard recording of raw data<br><input type="checkbox"/> Free recording of raw data<br><input type="checkbox"/> Anecdotic                                                                                                        |
| Analysis                   | <input checked="" type="checkbox"/> Reported, verifiable methodology<br><input type="checkbox"/> Reported, unverifiable methodology<br><input type="checkbox"/> Unknown, unverifiable methodology                                                                      |
| Quality of analysis        | <input checked="" type="checkbox"/> Scientifically based<br><input type="checkbox"/> Indicative only<br><input type="checkbox"/> Unknown                                                                                                                               |
| <b>REPORTING</b>           |                                                                                                                                                                                                                                                                        |
| Language                   | Reporting language(s): Dutch                                                                                                                                                                                                                                           |
| Availability               | <input type="checkbox"/> Scientific publication<br><input checked="" type="checkbox"/> Official report available on the internet or in other public forum<br><input type="checkbox"/> Official report available from network<br><input type="checkbox"/> Not available |
| Frequency                  | <input type="checkbox"/> $\geq 1$ time/year<br><input type="checkbox"/> < 1 time/year – Reports per monitoring area                                                                                                                                                    |
| Historical reference       | <input checked="" type="checkbox"/> over $\geq 5$ years<br><input type="checkbox"/> between 1 and 5 years<br><input type="checkbox"/> no historical analysis                                                                                                           |
| <b>COMMENT(S)</b>          |                                                                                                                                                                                                                                                                        |
| Formal monitoring network. |                                                                                                                                                                                                                                                                        |

## GSEN-09-0038.00.2 NL – RAVON

| EuropaBio's coordinated approach to General Surveillance: Existing Networks |                                                                                                                                                                                                                                                                                                                                                                                                      |                                                                                                                                                                                                                                                                                                                                                                                                                                                                                                                              |                                                                                                                                                                                                                                                                                              |
|-----------------------------------------------------------------------------|------------------------------------------------------------------------------------------------------------------------------------------------------------------------------------------------------------------------------------------------------------------------------------------------------------------------------------------------------------------------------------------------------|------------------------------------------------------------------------------------------------------------------------------------------------------------------------------------------------------------------------------------------------------------------------------------------------------------------------------------------------------------------------------------------------------------------------------------------------------------------------------------------------------------------------------|----------------------------------------------------------------------------------------------------------------------------------------------------------------------------------------------------------------------------------------------------------------------------------------------|
| ORGANISATION                                                                |                                                                                                                                                                                                                                                                                                                                                                                                      |                                                                                                                                                                                                                                                                                                                                                                                                                                                                                                                              |                                                                                                                                                                                                                                                                                              |
| EuropaBio reference                                                         | GS-EN-09-0038                                                                                                                                                                                                                                                                                                                                                                                        |                                                                                                                                                                                                                                                                                                                                                                                                                                                                                                                              |                                                                                                                                                                                                                                                                                              |
| Official name of the Network                                                | Reptielen Amfibieën Vissen Onderzoek Nederland                                                                                                                                                                                                                                                                                                                                                       |                                                                                                                                                                                                                                                                                                                                                                                                                                                                                                                              |                                                                                                                                                                                                                                                                                              |
| Other names                                                                 | RAVON<br>Reptile, Amphibian & Fish Conservation the Netherlands                                                                                                                                                                                                                                                                                                                                      |                                                                                                                                                                                                                                                                                                                                                                                                                                                                                                                              |                                                                                                                                                                                                                                                                                              |
| Type of organisation                                                        | Nature conservation<br>Founded (unknown)                                                                                                                                                                                                                                                                                                                                                             |                                                                                                                                                                                                                                                                                                                                                                                                                                                                                                                              |                                                                                                                                                                                                                                                                                              |
| Coordinates                                                                 | Postal address:<br>Stichting RAVON<br>Postbus 1413<br>6501 BK Nijmegen<br>fax: 024-3652037<br><br>Visiting Address:<br>Erasmustoren<br>Erasmusplein 1<br>6525 HT Nijmegen                                                                                                                                                                                                                            |                                                                                                                                                                                                                                                                                                                                                                                                                                                                                                                              |                                                                                                                                                                                                                                                                                              |
| Website                                                                     | <a href="http://www.ravon.nl">http://www.ravon.nl</a>                                                                                                                                                                                                                                                                                                                                                |                                                                                                                                                                                                                                                                                                                                                                                                                                                                                                                              |                                                                                                                                                                                                                                                                                              |
| Funding                                                                     | 950 members<br>Ministry of Agriculture, Nature and Food Quality<br>CBS – Statistics Netherlands                                                                                                                                                                                                                                                                                                      |                                                                                                                                                                                                                                                                                                                                                                                                                                                                                                                              |                                                                                                                                                                                                                                                                                              |
| Conflict of interest                                                        | -                                                                                                                                                                                                                                                                                                                                                                                                    |                                                                                                                                                                                                                                                                                                                                                                                                                                                                                                                              |                                                                                                                                                                                                                                                                                              |
| Part of other network(s)                                                    | Stichting VeldOnderzoek Flora en Fauna (VOFF) and<br>Netwerk Ecologische Monitoring (NEM)                                                                                                                                                                                                                                                                                                            |                                                                                                                                                                                                                                                                                                                                                                                                                                                                                                                              |                                                                                                                                                                                                                                                                                              |
| Grouping other network(s)                                                   | 12 provincial delegations and 9 working groups                                                                                                                                                                                                                                                                                                                                                       |                                                                                                                                                                                                                                                                                                                                                                                                                                                                                                                              |                                                                                                                                                                                                                                                                                              |
| MONITORING SUBJECT                                                          |                                                                                                                                                                                                                                                                                                                                                                                                      |                                                                                                                                                                                                                                                                                                                                                                                                                                                                                                                              |                                                                                                                                                                                                                                                                                              |
| Description                                                                 | Monitoring and collecting distribution data of reptiles, amphibians and fish;<br>2 national networks: amphibians and reptilians                                                                                                                                                                                                                                                                      |                                                                                                                                                                                                                                                                                                                                                                                                                                                                                                                              |                                                                                                                                                                                                                                                                                              |
| Protection goal(s) and/or influencing factor(s)                             | <input checked="" type="checkbox"/> Protection goal<br><br><input checked="" type="checkbox"/> Biodiversity: reptiles and fishes<br><input type="checkbox"/> Human Health<br><input type="checkbox"/> Animal Health<br><input type="checkbox"/> Plant Health<br><input type="checkbox"/> Soil function<br><input type="checkbox"/> Water quality<br><input type="checkbox"/> Sustainable Agriculture | <input type="checkbox"/> Influencing factor<br><br><input type="checkbox"/> Agronomic practice<br><input type="checkbox"/> Plant protection<br><input type="checkbox"/> GMO cultivation<br><input type="checkbox"/> Environmental conditions                                                                                                                                                                                                                                                                                 |                                                                                                                                                                                                                                                                                              |
| Duplication of Farmer's questionnaire                                       | <input checked="" type="checkbox"/> No duplication<br><input type="checkbox"/> Partly duplication<br><input type="checkbox"/> Complete duplication                                                                                                                                                                                                                                                   |                                                                                                                                                                                                                                                                                                                                                                                                                                                                                                                              |                                                                                                                                                                                                                                                                                              |
| SPECIFICITY                                                                 |                                                                                                                                                                                                                                                                                                                                                                                                      |                                                                                                                                                                                                                                                                                                                                                                                                                                                                                                                              |                                                                                                                                                                                                                                                                                              |
| Geography                                                                   | <input type="checkbox"/> EU -wide                                                                                                                                                                                                                                                                                                                                                                    |                                                                                                                                                                                                                                                                                                                                                                                                                                                                                                                              |                                                                                                                                                                                                                                                                                              |
|                                                                             | <input type="checkbox"/> Zone A – North                                                                                                                                                                                                                                                                                                                                                              | <input checked="" type="checkbox"/> Zone B – Centre:                                                                                                                                                                                                                                                                                                                                                                                                                                                                         | <input type="checkbox"/> Zone C – South                                                                                                                                                                                                                                                      |
|                                                                             | <input type="checkbox"/> Denmark,<br><input type="checkbox"/> Estonia,<br><input type="checkbox"/> Latvia,<br><input type="checkbox"/> Lithuania,<br><input type="checkbox"/> Finland,<br><input type="checkbox"/> Sweden                                                                                                                                                                            | <input type="checkbox"/> Belgium,<br><input type="checkbox"/> Czech Republic<br><input type="checkbox"/> Germany,<br><input type="checkbox"/> Ireland,<br><input type="checkbox"/> Luxembourg,<br><input type="checkbox"/> Hungary,<br><input checked="" type="checkbox"/> Netherlands,<br><input type="checkbox"/> Austria,<br><input type="checkbox"/> Poland,<br><input type="checkbox"/> Romania,<br><input type="checkbox"/> Slovenia,<br><input type="checkbox"/> Slovakia,<br><input type="checkbox"/> United Kingdom | <input type="checkbox"/> Bulgaria,<br><input type="checkbox"/> Greece,<br><input type="checkbox"/> Spain,<br><input type="checkbox"/> France,<br><input type="checkbox"/> Italy,<br><input type="checkbox"/> Cyprus,<br><input type="checkbox"/> Malta,<br><input type="checkbox"/> Portugal |
|                                                                             | <input type="checkbox"/> Regional (specify)<br><input type="checkbox"/> Local (specify)                                                                                                                                                                                                                                                                                                              |                                                                                                                                                                                                                                                                                                                                                                                                                                                                                                                              |                                                                                                                                                                                                                                                                                              |
| Factors                                                                     | <input checked="" type="checkbox"/> Multiple species/items (specify) reptiles, fish and amphibians<br><input type="checkbox"/> Single species/item (specify)                                                                                                                                                                                                                                         |                                                                                                                                                                                                                                                                                                                                                                                                                                                                                                                              |                                                                                                                                                                                                                                                                                              |
| Crop                                                                        | <input checked="" type="checkbox"/> No specific crop(s)<br><input type="checkbox"/> Several crops (e.g. all cereals)                                                                                                                                                                                                                                                                                 |                                                                                                                                                                                                                                                                                                                                                                                                                                                                                                                              |                                                                                                                                                                                                                                                                                              |

|                                                                                          |                                                                                                                                                                                                                                                                        |
|------------------------------------------------------------------------------------------|------------------------------------------------------------------------------------------------------------------------------------------------------------------------------------------------------------------------------------------------------------------------|
|                                                                                          | <input type="checkbox"/> Single crop                                                                                                                                                                                                                                   |
| Trait /treatment                                                                         | <input checked="" type="checkbox"/> No specific traits/treatments<br><input type="checkbox"/> Several traits/treatments<br><input type="checkbox"/> Single trait/treatment                                                                                             |
| GMO                                                                                      | <input checked="" type="checkbox"/> No GMO bias<br><input type="checkbox"/> GMO specific                                                                                                                                                                               |
| <b>METHODOLOGY</b>                                                                       |                                                                                                                                                                                                                                                                        |
| Observations                                                                             | <input checked="" type="checkbox"/> Reported, verifiable methodology<br><input type="checkbox"/> Reported, unverifiable methodology<br><input type="checkbox"/> Unknown, unverifiable methodology                                                                      |
| Frequency                                                                                | <input checked="" type="checkbox"/> > 1 time/year<br><input type="checkbox"/> 1 time/year<br><input type="checkbox"/> < 1 time/year                                                                                                                                    |
| Future                                                                                   | <input checked="" type="checkbox"/> For ≥ 5 years<br><input type="checkbox"/> between 1 and 5 years<br><input type="checkbox"/> no prospect                                                                                                                            |
| Quality of performers                                                                    | <input type="checkbox"/> Trained, professionals<br><input checked="" type="checkbox"/> Trained, non-professionals – training by documentation, volunteers<br><input type="checkbox"/> Uncertain or not -specified                                                      |
| Quality of data                                                                          | <input checked="" type="checkbox"/> Standard recording of raw data<br><input type="checkbox"/> Free recording of raw data<br><input type="checkbox"/> Anecdotic                                                                                                        |
| Analysis                                                                                 | <input checked="" type="checkbox"/> Reported, verifiable methodology<br><input type="checkbox"/> Reported, unverifiable methodology<br><input type="checkbox"/> Unknown, unverifiable methodology                                                                      |
| Quality of analysis                                                                      | <input checked="" type="checkbox"/> Scientifically based<br><input type="checkbox"/> Indicative only<br><input type="checkbox"/> Unknown                                                                                                                               |
| <b>REPORTING</b>                                                                         |                                                                                                                                                                                                                                                                        |
| Language                                                                                 | Reporting language(s): Dutch                                                                                                                                                                                                                                           |
| Availability                                                                             | <input type="checkbox"/> Scientific publication<br><input checked="" type="checkbox"/> Official report available on the internet or in other public forum<br><input type="checkbox"/> Official report available from network<br><input type="checkbox"/> Not available |
| Frequency                                                                                | <input checked="" type="checkbox"/> ≥ 1 time/year – Yearly reports since 1997<br><input type="checkbox"/> < 1 time/year – Reports per species or on local findings; distribution maps                                                                                  |
| Historical reference                                                                     | <input checked="" type="checkbox"/> over ≥ 5 years<br><input type="checkbox"/> between 1 and 5 years<br><input type="checkbox"/> no historical analysis                                                                                                                |
| <b>COMMENT(S)</b>                                                                        |                                                                                                                                                                                                                                                                        |
| Formal monitoring network focussing on conservation targets for amphibians and reptiles. |                                                                                                                                                                                                                                                                        |

**GSEN-09-0039.00.2 NL – SOVON**

| <b>EuropaBio's coordinated approach to General Surveillance: Existing Networks</b> |                                                                                                                                                                                                                                                                                                                                                                                                              |                                                                                                                                                                                                                                              |  |                                                                                                                                                                                                                                                                                                                                                                                                                                                                                                                                                                                      |                                                                                                                                                                                                                                                                                                                                         |
|------------------------------------------------------------------------------------|--------------------------------------------------------------------------------------------------------------------------------------------------------------------------------------------------------------------------------------------------------------------------------------------------------------------------------------------------------------------------------------------------------------|----------------------------------------------------------------------------------------------------------------------------------------------------------------------------------------------------------------------------------------------|--|--------------------------------------------------------------------------------------------------------------------------------------------------------------------------------------------------------------------------------------------------------------------------------------------------------------------------------------------------------------------------------------------------------------------------------------------------------------------------------------------------------------------------------------------------------------------------------------|-----------------------------------------------------------------------------------------------------------------------------------------------------------------------------------------------------------------------------------------------------------------------------------------------------------------------------------------|
| <b>ORGANISATION</b>                                                                |                                                                                                                                                                                                                                                                                                                                                                                                              |                                                                                                                                                                                                                                              |  |                                                                                                                                                                                                                                                                                                                                                                                                                                                                                                                                                                                      |                                                                                                                                                                                                                                                                                                                                         |
| EuropaBio reference                                                                | GS-EN-09-0039                                                                                                                                                                                                                                                                                                                                                                                                |                                                                                                                                                                                                                                              |  |                                                                                                                                                                                                                                                                                                                                                                                                                                                                                                                                                                                      |                                                                                                                                                                                                                                                                                                                                         |
| Official name of the Network                                                       | <b>SOVON Vogelonderzoek Nederland</b>                                                                                                                                                                                                                                                                                                                                                                        |                                                                                                                                                                                                                                              |  |                                                                                                                                                                                                                                                                                                                                                                                                                                                                                                                                                                                      |                                                                                                                                                                                                                                                                                                                                         |
| Other names                                                                        | SOVON<br>SOVON Bird Research Netherlands                                                                                                                                                                                                                                                                                                                                                                     |                                                                                                                                                                                                                                              |  |                                                                                                                                                                                                                                                                                                                                                                                                                                                                                                                                                                                      |                                                                                                                                                                                                                                                                                                                                         |
| Type of organisation                                                               | Nature conservation<br>Founded (unknown)                                                                                                                                                                                                                                                                                                                                                                     |                                                                                                                                                                                                                                              |  |                                                                                                                                                                                                                                                                                                                                                                                                                                                                                                                                                                                      |                                                                                                                                                                                                                                                                                                                                         |
| Coordinates                                                                        | Rijksstraatweg 178<br>6573 DG Beek-Ubbergen                                                                                                                                                                                                                                                                                                                                                                  |                                                                                                                                                                                                                                              |  |                                                                                                                                                                                                                                                                                                                                                                                                                                                                                                                                                                                      |                                                                                                                                                                                                                                                                                                                                         |
| Website                                                                            | <a href="http://www.sovon.nl">http://www.sovon.nl</a>                                                                                                                                                                                                                                                                                                                                                        |                                                                                                                                                                                                                                              |  |                                                                                                                                                                                                                                                                                                                                                                                                                                                                                                                                                                                      |                                                                                                                                                                                                                                                                                                                                         |
| Funding                                                                            | Membership, projects, funding                                                                                                                                                                                                                                                                                                                                                                                |                                                                                                                                                                                                                                              |  |                                                                                                                                                                                                                                                                                                                                                                                                                                                                                                                                                                                      |                                                                                                                                                                                                                                                                                                                                         |
| Conflict of interest                                                               | -                                                                                                                                                                                                                                                                                                                                                                                                            |                                                                                                                                                                                                                                              |  |                                                                                                                                                                                                                                                                                                                                                                                                                                                                                                                                                                                      |                                                                                                                                                                                                                                                                                                                                         |
| Part of other network(s)                                                           | European Bird Census Council<br>Bird Life International<br><br>Collaboration with<br>Stichting VeldOnderzoek Flora en Fauna (VOFF) and<br>Netwerk Ecologische Monitoring (NEM)                                                                                                                                                                                                                               |                                                                                                                                                                                                                                              |  |                                                                                                                                                                                                                                                                                                                                                                                                                                                                                                                                                                                      |                                                                                                                                                                                                                                                                                                                                         |
| Grouping other network(s)                                                          | 60 staff, over 7000 volunteer observers<br>20 regions, 20 districts                                                                                                                                                                                                                                                                                                                                          |                                                                                                                                                                                                                                              |  |                                                                                                                                                                                                                                                                                                                                                                                                                                                                                                                                                                                      |                                                                                                                                                                                                                                                                                                                                         |
| <b>MONITORING SUBJECT</b>                                                          |                                                                                                                                                                                                                                                                                                                                                                                                              |                                                                                                                                                                                                                                              |  |                                                                                                                                                                                                                                                                                                                                                                                                                                                                                                                                                                                      |                                                                                                                                                                                                                                                                                                                                         |
| Description                                                                        | Monitoring and collecting distribution data of birds                                                                                                                                                                                                                                                                                                                                                         |                                                                                                                                                                                                                                              |  |                                                                                                                                                                                                                                                                                                                                                                                                                                                                                                                                                                                      |                                                                                                                                                                                                                                                                                                                                         |
| Protection goal(s) and/or influencing factor(s)                                    | <input checked="" type="checkbox"/> Protection goal<br><br><input checked="" type="checkbox"/> Biodiversity: birds<br><input type="checkbox"/> Human Health<br><input type="checkbox"/> Animal Health<br><input type="checkbox"/> Plant Health<br><input type="checkbox"/> Soil function<br><input type="checkbox"/> Water quality<br><input type="checkbox"/> Sustainable Agriculture                       | <input type="checkbox"/> Influencing factor<br><br><input type="checkbox"/> Agronomic practice<br><input type="checkbox"/> Plant protection<br><input type="checkbox"/> GMO cultivation<br><input type="checkbox"/> Environmental conditions |  |                                                                                                                                                                                                                                                                                                                                                                                                                                                                                                                                                                                      |                                                                                                                                                                                                                                                                                                                                         |
| Duplication of Farmer's questionnaire                                              | <input checked="" type="checkbox"/> No duplication<br><input type="checkbox"/> Partly duplication<br><input type="checkbox"/> Complete duplication                                                                                                                                                                                                                                                           |                                                                                                                                                                                                                                              |  |                                                                                                                                                                                                                                                                                                                                                                                                                                                                                                                                                                                      |                                                                                                                                                                                                                                                                                                                                         |
| <b>SPECIFICITY</b>                                                                 |                                                                                                                                                                                                                                                                                                                                                                                                              |                                                                                                                                                                                                                                              |  |                                                                                                                                                                                                                                                                                                                                                                                                                                                                                                                                                                                      |                                                                                                                                                                                                                                                                                                                                         |
| Geography                                                                          | <input type="checkbox"/> EU -wide<br><br><input type="checkbox"/> Zone A – North<br><input type="checkbox"/> Denmark,<br><input type="checkbox"/> Estonia,<br><input type="checkbox"/> Latvia,<br><input type="checkbox"/> Lithuania,<br><input type="checkbox"/> Finland,<br><input type="checkbox"/> Sweden<br><br><input type="checkbox"/> Regional (specify)<br><input type="checkbox"/> Local (specify) |                                                                                                                                                                                                                                              |  | <input checked="" type="checkbox"/> Zone B – Centre:<br><input type="checkbox"/> Belgium,<br><input type="checkbox"/> Czech Republic<br><input type="checkbox"/> Germany,<br><input type="checkbox"/> Ireland,<br><input type="checkbox"/> Luxembourg,<br><input type="checkbox"/> Hungary,<br><input checked="" type="checkbox"/> Netherlands,<br><input type="checkbox"/> Austria,<br><input type="checkbox"/> Poland,<br><input type="checkbox"/> Romania,<br><input type="checkbox"/> Slovenia,<br><input type="checkbox"/> Slovakia,<br><input type="checkbox"/> United Kingdom | <input type="checkbox"/> Zone C – South<br><input type="checkbox"/> Bulgaria,<br><input type="checkbox"/> Greece,<br><input type="checkbox"/> Spain,<br><input type="checkbox"/> France,<br><input type="checkbox"/> Italy,<br><input type="checkbox"/> Cyprus,<br><input type="checkbox"/> Malta,<br><input type="checkbox"/> Portugal |
| Factors                                                                            | <input checked="" type="checkbox"/> Multiple species/items (specify): birds<br><input type="checkbox"/> Single species/item (specify)                                                                                                                                                                                                                                                                        |                                                                                                                                                                                                                                              |  |                                                                                                                                                                                                                                                                                                                                                                                                                                                                                                                                                                                      |                                                                                                                                                                                                                                                                                                                                         |
| Crop                                                                               | <input checked="" type="checkbox"/> No specific crop(s)<br><input type="checkbox"/> Several crops (e.g. all cereals)<br><input type="checkbox"/> Single crop                                                                                                                                                                                                                                                 |                                                                                                                                                                                                                                              |  |                                                                                                                                                                                                                                                                                                                                                                                                                                                                                                                                                                                      |                                                                                                                                                                                                                                                                                                                                         |
| Trait /treatment                                                                   | <input checked="" type="checkbox"/> No specific traits/treatments<br><input type="checkbox"/> Several traits/treatments<br><input type="checkbox"/> Single trait/treatment                                                                                                                                                                                                                                   |                                                                                                                                                                                                                                              |  |                                                                                                                                                                                                                                                                                                                                                                                                                                                                                                                                                                                      |                                                                                                                                                                                                                                                                                                                                         |
| GMO                                                                                | <input checked="" type="checkbox"/> No GMO bias                                                                                                                                                                                                                                                                                                                                                              |                                                                                                                                                                                                                                              |  |                                                                                                                                                                                                                                                                                                                                                                                                                                                                                                                                                                                      |                                                                                                                                                                                                                                                                                                                                         |

|                                                                                                      |                                                                                                                                                                                                                                                                        |
|------------------------------------------------------------------------------------------------------|------------------------------------------------------------------------------------------------------------------------------------------------------------------------------------------------------------------------------------------------------------------------|
|                                                                                                      | <input type="checkbox"/> GMO specific                                                                                                                                                                                                                                  |
| <b>METHODOLOGY</b>                                                                                   |                                                                                                                                                                                                                                                                        |
| Observations                                                                                         | <input checked="" type="checkbox"/> Reported, verifiable methodology<br><input type="checkbox"/> Reported, unverifiable methodology<br><input type="checkbox"/> Unknown, unverifiable methodology                                                                      |
| Frequency                                                                                            | <input checked="" type="checkbox"/> > 1 time/year<br><input type="checkbox"/> 1 time/year<br><input type="checkbox"/> < 1 time/year                                                                                                                                    |
| Future                                                                                               | <input checked="" type="checkbox"/> For ≥ 5 years<br><input type="checkbox"/> between 1 and 5 years<br><input type="checkbox"/> no prospect                                                                                                                            |
| Quality of performers                                                                                | <input type="checkbox"/> Trained, professionals<br><input checked="" type="checkbox"/> Trained, non-professionals – training by documentation, volunteers<br><input type="checkbox"/> Uncertain or not -specified                                                      |
| Quality of data                                                                                      | <input checked="" type="checkbox"/> Standard recording of raw data<br><input type="checkbox"/> Free recording of raw data<br><input type="checkbox"/> Anecdotic                                                                                                        |
| Analysis                                                                                             | <input checked="" type="checkbox"/> Reported, verifiable methodology<br><input type="checkbox"/> Reported, unverifiable methodology<br><input type="checkbox"/> Unknown, unverifiable methodology                                                                      |
| Quality of analysis                                                                                  | <input checked="" type="checkbox"/> Scientifically based<br><input type="checkbox"/> Indicative only<br><input type="checkbox"/> Unknown                                                                                                                               |
| <b>REPORTING</b>                                                                                     |                                                                                                                                                                                                                                                                        |
| Language                                                                                             | Reporting language(s): Dutch                                                                                                                                                                                                                                           |
| Availability                                                                                         | <input type="checkbox"/> Scientific publication<br><input checked="" type="checkbox"/> Official report available on the internet or in other public forum<br><input type="checkbox"/> Official report available from network<br><input type="checkbox"/> Not available |
| Frequency                                                                                            | <input checked="" type="checkbox"/> ≥ 1 time/year – Yearly reports since 1997<br><input type="checkbox"/> < 1 time/year – Reports per species or on local findings; distribution maps                                                                                  |
| Historical reference                                                                                 | <input checked="" type="checkbox"/> over ≥ 5 years<br><input type="checkbox"/> between 1 and 5 years<br><input type="checkbox"/> no historical analysis                                                                                                                |
| <b>COMMENT(S)</b>                                                                                    |                                                                                                                                                                                                                                                                        |
| Monitoring network using selected bird species as representative indicators and as protection goals. |                                                                                                                                                                                                                                                                        |

## GSEN-09-0040.00.2 NL – TINEA

| EuropaBio's coordinated approach to General Surveillance: Existing Networks |                                                                                                                                                                                                                                                                                                                                                                                          |                                                                                                                                                                                                                                                                                                                                                                                                                                                                                                                              |                                                                                                                                                                                                                                                                                              |
|-----------------------------------------------------------------------------|------------------------------------------------------------------------------------------------------------------------------------------------------------------------------------------------------------------------------------------------------------------------------------------------------------------------------------------------------------------------------------------|------------------------------------------------------------------------------------------------------------------------------------------------------------------------------------------------------------------------------------------------------------------------------------------------------------------------------------------------------------------------------------------------------------------------------------------------------------------------------------------------------------------------------|----------------------------------------------------------------------------------------------------------------------------------------------------------------------------------------------------------------------------------------------------------------------------------------------|
| <b>ORGANISATION</b>                                                         |                                                                                                                                                                                                                                                                                                                                                                                          |                                                                                                                                                                                                                                                                                                                                                                                                                                                                                                                              |                                                                                                                                                                                                                                                                                              |
| EuropaBio reference                                                         | GS-EN-09-0040                                                                                                                                                                                                                                                                                                                                                                            |                                                                                                                                                                                                                                                                                                                                                                                                                                                                                                                              |                                                                                                                                                                                                                                                                                              |
| Official name of the Network                                                | Stichting TINEA – Kleine Vlinders                                                                                                                                                                                                                                                                                                                                                        |                                                                                                                                                                                                                                                                                                                                                                                                                                                                                                                              |                                                                                                                                                                                                                                                                                              |
| Other names                                                                 | TINEA Foundation – Small Butterflies                                                                                                                                                                                                                                                                                                                                                     |                                                                                                                                                                                                                                                                                                                                                                                                                                                                                                                              |                                                                                                                                                                                                                                                                                              |
| Type of organisation                                                        | Nature conservation<br>Founded 1986                                                                                                                                                                                                                                                                                                                                                      |                                                                                                                                                                                                                                                                                                                                                                                                                                                                                                                              |                                                                                                                                                                                                                                                                                              |
| Coordinates                                                                 | Reeboklaan 1,<br>6705 DA Wageningen,<br>tel.0317-413259.<br>Email: <a href="mailto:stichtingtinea[at]tiscali.nl">stichtingtinea[at]tiscali.nl</a> ,                                                                                                                                                                                                                                      |                                                                                                                                                                                                                                                                                                                                                                                                                                                                                                                              |                                                                                                                                                                                                                                                                                              |
| Website                                                                     | <a href="http://www.kleinevlinders.nl">http://www.kleinevlinders.nl</a>                                                                                                                                                                                                                                                                                                                  |                                                                                                                                                                                                                                                                                                                                                                                                                                                                                                                              |                                                                                                                                                                                                                                                                                              |
| Funding                                                                     | Membership, donations                                                                                                                                                                                                                                                                                                                                                                    |                                                                                                                                                                                                                                                                                                                                                                                                                                                                                                                              |                                                                                                                                                                                                                                                                                              |
| Conflict of interest                                                        | -                                                                                                                                                                                                                                                                                                                                                                                        |                                                                                                                                                                                                                                                                                                                                                                                                                                                                                                                              |                                                                                                                                                                                                                                                                                              |
| Part of other network(s)                                                    | Collaboration with<br>Stichting VeldOnderzoek Flora en Fauna (VOFF) and<br>Netwerk Ecologische Monitoring (NEM)                                                                                                                                                                                                                                                                          |                                                                                                                                                                                                                                                                                                                                                                                                                                                                                                                              |                                                                                                                                                                                                                                                                                              |
| Grouping other network(s)                                                   |                                                                                                                                                                                                                                                                                                                                                                                          |                                                                                                                                                                                                                                                                                                                                                                                                                                                                                                                              |                                                                                                                                                                                                                                                                                              |
| <b>MONITORING SUBJECT</b>                                                   |                                                                                                                                                                                                                                                                                                                                                                                          |                                                                                                                                                                                                                                                                                                                                                                                                                                                                                                                              |                                                                                                                                                                                                                                                                                              |
| Description                                                                 | Monitoring and collecting distribution data of small butterflies                                                                                                                                                                                                                                                                                                                         |                                                                                                                                                                                                                                                                                                                                                                                                                                                                                                                              |                                                                                                                                                                                                                                                                                              |
| Protection goal(s) and/or influencing factor(s)                             | <input checked="" type="checkbox"/> Protection goal<br><input checked="" type="checkbox"/> Biodiversity: butterflies<br><input type="checkbox"/> Human Health<br><input type="checkbox"/> Animal Health<br><input type="checkbox"/> Plant Health<br><input type="checkbox"/> Soil function<br><input type="checkbox"/> Water quality<br><input type="checkbox"/> Sustainable Agriculture | <input type="checkbox"/> Influencing factor<br><input type="checkbox"/> Agronomic practice<br><input type="checkbox"/> Plant protection<br><input type="checkbox"/> GMO cultivation<br><input type="checkbox"/> Environmental conditions                                                                                                                                                                                                                                                                                     |                                                                                                                                                                                                                                                                                              |
| Duplication of Farmer's questionnaire                                       | <input checked="" type="checkbox"/> No duplication<br><input type="checkbox"/> Partly duplication<br><input type="checkbox"/> Complete duplication                                                                                                                                                                                                                                       |                                                                                                                                                                                                                                                                                                                                                                                                                                                                                                                              |                                                                                                                                                                                                                                                                                              |
| <b>SPECIFICITY</b>                                                          |                                                                                                                                                                                                                                                                                                                                                                                          |                                                                                                                                                                                                                                                                                                                                                                                                                                                                                                                              |                                                                                                                                                                                                                                                                                              |
| Geography                                                                   | <input type="checkbox"/> EU -wide<br><input type="checkbox"/> Zone A – North<br><input checked="" type="checkbox"/> Zone B – Centre:<br><input type="checkbox"/> Zone C – South                                                                                                                                                                                                          |                                                                                                                                                                                                                                                                                                                                                                                                                                                                                                                              |                                                                                                                                                                                                                                                                                              |
|                                                                             | <input type="checkbox"/> Denmark,<br><input type="checkbox"/> Estonia,<br><input type="checkbox"/> Latvia,<br><input type="checkbox"/> Lithuania,<br><input type="checkbox"/> Finland,<br><input type="checkbox"/> Sweden                                                                                                                                                                | <input type="checkbox"/> Belgium,<br><input type="checkbox"/> Czech Republic<br><input type="checkbox"/> Germany,<br><input type="checkbox"/> Ireland,<br><input type="checkbox"/> Luxembourg,<br><input type="checkbox"/> Hungary,<br><input checked="" type="checkbox"/> Netherlands,<br><input type="checkbox"/> Austria,<br><input type="checkbox"/> Poland,<br><input type="checkbox"/> Romania,<br><input type="checkbox"/> Slovenia,<br><input type="checkbox"/> Slovakia,<br><input type="checkbox"/> United Kingdom | <input type="checkbox"/> Bulgaria,<br><input type="checkbox"/> Greece,<br><input type="checkbox"/> Spain,<br><input type="checkbox"/> France,<br><input type="checkbox"/> Italy,<br><input type="checkbox"/> Cyprus,<br><input type="checkbox"/> Malta,<br><input type="checkbox"/> Portugal |
|                                                                             | <input type="checkbox"/> Regional (specify)<br><input type="checkbox"/> Local (specify)                                                                                                                                                                                                                                                                                                  |                                                                                                                                                                                                                                                                                                                                                                                                                                                                                                                              |                                                                                                                                                                                                                                                                                              |
| Factors                                                                     | <input checked="" type="checkbox"/> Multiple species/items (specify) Small butterflies<br><input type="checkbox"/> Single species/item (specify)                                                                                                                                                                                                                                         |                                                                                                                                                                                                                                                                                                                                                                                                                                                                                                                              |                                                                                                                                                                                                                                                                                              |
| Crop                                                                        | <input checked="" type="checkbox"/> No specific crop(s)<br><input type="checkbox"/> Several crops (e.g. all cereals)<br><input type="checkbox"/> Single crop                                                                                                                                                                                                                             |                                                                                                                                                                                                                                                                                                                                                                                                                                                                                                                              |                                                                                                                                                                                                                                                                                              |
| Trait /treatment                                                            | <input checked="" type="checkbox"/> No specific traits/treatments<br><input type="checkbox"/> Several traits/treatments<br><input type="checkbox"/> Single trait/treatment                                                                                                                                                                                                               |                                                                                                                                                                                                                                                                                                                                                                                                                                                                                                                              |                                                                                                                                                                                                                                                                                              |
| GMO                                                                         | <input checked="" type="checkbox"/> No GMO bias<br><input type="checkbox"/> GMO specific                                                                                                                                                                                                                                                                                                 |                                                                                                                                                                                                                                                                                                                                                                                                                                                                                                                              |                                                                                                                                                                                                                                                                                              |
| <b>METHODOLOGY</b>                                                          |                                                                                                                                                                                                                                                                                                                                                                                          |                                                                                                                                                                                                                                                                                                                                                                                                                                                                                                                              |                                                                                                                                                                                                                                                                                              |

|                                                                                                                                                                                                                         |                                                                                                                                                                                                                                                                        |
|-------------------------------------------------------------------------------------------------------------------------------------------------------------------------------------------------------------------------|------------------------------------------------------------------------------------------------------------------------------------------------------------------------------------------------------------------------------------------------------------------------|
| Observations                                                                                                                                                                                                            | <input checked="" type="checkbox"/> Reported, verifiable methodology<br><input type="checkbox"/> Reported, unverifiable methodology<br><input type="checkbox"/> Unknown, unverifiable methodology                                                                      |
| Frequency                                                                                                                                                                                                               | <input checked="" type="checkbox"/> > 1 time/year<br><input type="checkbox"/> 1 time/year<br><input type="checkbox"/> < 1 time/year                                                                                                                                    |
| Future                                                                                                                                                                                                                  | <input checked="" type="checkbox"/> For $\geq$ 5 years<br><input type="checkbox"/> between 1 and 5 years<br><input type="checkbox"/> no prospect                                                                                                                       |
| Quality of performers                                                                                                                                                                                                   | <input type="checkbox"/> Trained, professionals<br><input checked="" type="checkbox"/> Trained, non-professionals – training by documentation, volunteers<br><input type="checkbox"/> Uncertain or not -specified                                                      |
| Quality of data                                                                                                                                                                                                         | <input checked="" type="checkbox"/> Standard recording of raw data<br><input type="checkbox"/> Free recording of raw data<br><input type="checkbox"/> Anecdotic                                                                                                        |
| Analysis                                                                                                                                                                                                                | <input checked="" type="checkbox"/> Reported, verifiable methodology<br><input type="checkbox"/> Reported, unverifiable methodology<br><input type="checkbox"/> Unknown, unverifiable methodology                                                                      |
| Quality of analysis                                                                                                                                                                                                     | <input checked="" type="checkbox"/> Scientifically based<br><input type="checkbox"/> Indicative only<br><input type="checkbox"/> Unknown                                                                                                                               |
| <b>REPORTING</b>                                                                                                                                                                                                        |                                                                                                                                                                                                                                                                        |
| Language                                                                                                                                                                                                                | Reporting language(s): Dutch                                                                                                                                                                                                                                           |
| Availability                                                                                                                                                                                                            | <input type="checkbox"/> Scientific publication<br><input type="checkbox"/> Official report available on the internet or in other public forum<br><input type="checkbox"/> Official report available from network<br><input checked="" type="checkbox"/> Not available |
| Frequency                                                                                                                                                                                                               | <input type="checkbox"/> $\geq$ 1 time/year –<br><input type="checkbox"/> < 1 time/year –                                                                                                                                                                              |
| Historical reference                                                                                                                                                                                                    | <input checked="" type="checkbox"/> over $\geq$ 5 years<br><input type="checkbox"/> between 1 and 5 years<br><input type="checkbox"/> no historical analysis                                                                                                           |
| <b>COMMENT(S)</b>                                                                                                                                                                                                       |                                                                                                                                                                                                                                                                        |
| Monitoring network using selected butterfly species as representative indicators and as protection goals. No direct publications. Information provided to other initiatives on Inventarisatie (e.g. Species Catalogue). |                                                                                                                                                                                                                                                                        |



## GSEN-09-0041.00.2 NL – Vlinderstichting

| EuropaBio's coordinated approach to General Surveillance: Existing Networks |                                                                                                                                                                                                                                                                                                                                                                                                              |                                                                                                                                                                                                                                              |  |                                                                                                                                                                                                                                                                                                                                                                                                                                                                                                                                                                                      |                                                                                                                                                                                                                                                                                                                                         |
|-----------------------------------------------------------------------------|--------------------------------------------------------------------------------------------------------------------------------------------------------------------------------------------------------------------------------------------------------------------------------------------------------------------------------------------------------------------------------------------------------------|----------------------------------------------------------------------------------------------------------------------------------------------------------------------------------------------------------------------------------------------|--|--------------------------------------------------------------------------------------------------------------------------------------------------------------------------------------------------------------------------------------------------------------------------------------------------------------------------------------------------------------------------------------------------------------------------------------------------------------------------------------------------------------------------------------------------------------------------------------|-----------------------------------------------------------------------------------------------------------------------------------------------------------------------------------------------------------------------------------------------------------------------------------------------------------------------------------------|
| <b>ORGANISATION</b>                                                         |                                                                                                                                                                                                                                                                                                                                                                                                              |                                                                                                                                                                                                                                              |  |                                                                                                                                                                                                                                                                                                                                                                                                                                                                                                                                                                                      |                                                                                                                                                                                                                                                                                                                                         |
| EuropaBio reference                                                         | GS-EN-09-0041                                                                                                                                                                                                                                                                                                                                                                                                |                                                                                                                                                                                                                                              |  |                                                                                                                                                                                                                                                                                                                                                                                                                                                                                                                                                                                      |                                                                                                                                                                                                                                                                                                                                         |
| Official name of the Network                                                | <b>Vlinderstichting</b>                                                                                                                                                                                                                                                                                                                                                                                      |                                                                                                                                                                                                                                              |  |                                                                                                                                                                                                                                                                                                                                                                                                                                                                                                                                                                                      |                                                                                                                                                                                                                                                                                                                                         |
| Other names                                                                 | Dutch Butterfly Conservation                                                                                                                                                                                                                                                                                                                                                                                 |                                                                                                                                                                                                                                              |  |                                                                                                                                                                                                                                                                                                                                                                                                                                                                                                                                                                                      |                                                                                                                                                                                                                                                                                                                                         |
| Type of organisation                                                        | Nature conservation<br>Founded 1983                                                                                                                                                                                                                                                                                                                                                                          |                                                                                                                                                                                                                                              |  |                                                                                                                                                                                                                                                                                                                                                                                                                                                                                                                                                                                      |                                                                                                                                                                                                                                                                                                                                         |
| Coordinates                                                                 | Postbus 506<br>6700 AM Wageningen<br><br>Email: info[at]vlinderstichting.nl                                                                                                                                                                                                                                                                                                                                  |                                                                                                                                                                                                                                              |  |                                                                                                                                                                                                                                                                                                                                                                                                                                                                                                                                                                                      |                                                                                                                                                                                                                                                                                                                                         |
| Website                                                                     | <a href="http://www.vlinderstichting.nl/">http://www.vlinderstichting.nl/</a>                                                                                                                                                                                                                                                                                                                                |                                                                                                                                                                                                                                              |  |                                                                                                                                                                                                                                                                                                                                                                                                                                                                                                                                                                                      |                                                                                                                                                                                                                                                                                                                                         |
| Funding                                                                     | Membership, donations                                                                                                                                                                                                                                                                                                                                                                                        |                                                                                                                                                                                                                                              |  |                                                                                                                                                                                                                                                                                                                                                                                                                                                                                                                                                                                      |                                                                                                                                                                                                                                                                                                                                         |
| Conflict of interest                                                        | -                                                                                                                                                                                                                                                                                                                                                                                                            |                                                                                                                                                                                                                                              |  |                                                                                                                                                                                                                                                                                                                                                                                                                                                                                                                                                                                      |                                                                                                                                                                                                                                                                                                                                         |
| Part of other network(s)                                                    | Butterfly Conservation Europe<br><br>Collaboration with<br>Stichting VeldOnderzoek Flora en Fauna (VOFF) and<br>PSO (Platform of Organizations for Species Conservation)<br>EIS-Netherlands (the Dutch branch of the European Invertebrate Survey).                                                                                                                                                          |                                                                                                                                                                                                                                              |  |                                                                                                                                                                                                                                                                                                                                                                                                                                                                                                                                                                                      |                                                                                                                                                                                                                                                                                                                                         |
| Grouping other network(s)                                                   | Local workgroups                                                                                                                                                                                                                                                                                                                                                                                             |                                                                                                                                                                                                                                              |  |                                                                                                                                                                                                                                                                                                                                                                                                                                                                                                                                                                                      |                                                                                                                                                                                                                                                                                                                                         |
| <b>MONITORING SUBJECT</b>                                                   |                                                                                                                                                                                                                                                                                                                                                                                                              |                                                                                                                                                                                                                                              |  |                                                                                                                                                                                                                                                                                                                                                                                                                                                                                                                                                                                      |                                                                                                                                                                                                                                                                                                                                         |
| Description                                                                 | Monitoring and collecting distribution data of butterflies                                                                                                                                                                                                                                                                                                                                                   |                                                                                                                                                                                                                                              |  |                                                                                                                                                                                                                                                                                                                                                                                                                                                                                                                                                                                      |                                                                                                                                                                                                                                                                                                                                         |
| Protection goal(s) and/or influencing factor(s)                             | <input checked="" type="checkbox"/> Protection goal<br><br><input checked="" type="checkbox"/> Biodiversity: butterflies<br><input type="checkbox"/> Human Health<br><input type="checkbox"/> Animal Health<br><input type="checkbox"/> Plant Health<br><input type="checkbox"/> Soil function<br><input type="checkbox"/> Water quality<br><input type="checkbox"/> Sustainable Agriculture                 | <input type="checkbox"/> Influencing factor<br><br><input type="checkbox"/> Agronomic practice<br><input type="checkbox"/> Plant protection<br><input type="checkbox"/> GMO cultivation<br><input type="checkbox"/> Environmental conditions |  |                                                                                                                                                                                                                                                                                                                                                                                                                                                                                                                                                                                      |                                                                                                                                                                                                                                                                                                                                         |
| Duplication of Farmer's questionnaire                                       | <input checked="" type="checkbox"/> No duplication<br><input type="checkbox"/> Partly duplication<br><input type="checkbox"/> Complete duplication                                                                                                                                                                                                                                                           |                                                                                                                                                                                                                                              |  |                                                                                                                                                                                                                                                                                                                                                                                                                                                                                                                                                                                      |                                                                                                                                                                                                                                                                                                                                         |
| <b>SPECIFICITY</b>                                                          |                                                                                                                                                                                                                                                                                                                                                                                                              |                                                                                                                                                                                                                                              |  |                                                                                                                                                                                                                                                                                                                                                                                                                                                                                                                                                                                      |                                                                                                                                                                                                                                                                                                                                         |
| Geography                                                                   | <input type="checkbox"/> EU -wide<br><br><input type="checkbox"/> Zone A – North<br><input type="checkbox"/> Denmark,<br><input type="checkbox"/> Estonia,<br><input type="checkbox"/> Latvia,<br><input type="checkbox"/> Lithuania,<br><input type="checkbox"/> Finland,<br><input type="checkbox"/> Sweden<br><br><input type="checkbox"/> Regional (specify)<br><input type="checkbox"/> Local (specify) |                                                                                                                                                                                                                                              |  | <input checked="" type="checkbox"/> Zone B – Centre:<br><input type="checkbox"/> Belgium,<br><input type="checkbox"/> Czech Republic<br><input type="checkbox"/> Germany,<br><input type="checkbox"/> Ireland,<br><input type="checkbox"/> Luxembourg,<br><input type="checkbox"/> Hungary,<br><input checked="" type="checkbox"/> Netherlands,<br><input type="checkbox"/> Austria,<br><input type="checkbox"/> Poland,<br><input type="checkbox"/> Romania,<br><input type="checkbox"/> Slovenia,<br><input type="checkbox"/> Slovakia,<br><input type="checkbox"/> United Kingdom | <input type="checkbox"/> Zone C – South<br><input type="checkbox"/> Bulgaria,<br><input type="checkbox"/> Greece,<br><input type="checkbox"/> Spain,<br><input type="checkbox"/> France,<br><input type="checkbox"/> Italy,<br><input type="checkbox"/> Cyprus,<br><input type="checkbox"/> Malta,<br><input type="checkbox"/> Portugal |
| Factors                                                                     | <input checked="" type="checkbox"/> Multiple species/items (specify): butterflies, moths and dragonflies<br><input type="checkbox"/> Single species/item (specify)                                                                                                                                                                                                                                           |                                                                                                                                                                                                                                              |  |                                                                                                                                                                                                                                                                                                                                                                                                                                                                                                                                                                                      |                                                                                                                                                                                                                                                                                                                                         |
| Crop                                                                        | <input checked="" type="checkbox"/> No specific crop(s)<br><input type="checkbox"/> Several crops (e.g. all cereals)<br><input type="checkbox"/> Single crop                                                                                                                                                                                                                                                 |                                                                                                                                                                                                                                              |  |                                                                                                                                                                                                                                                                                                                                                                                                                                                                                                                                                                                      |                                                                                                                                                                                                                                                                                                                                         |
| Trait /treatment                                                            | <input checked="" type="checkbox"/> No specific traits/treatments<br><input type="checkbox"/> Several traits/treatments<br><input type="checkbox"/> Single trait/treatment                                                                                                                                                                                                                                   |                                                                                                                                                                                                                                              |  |                                                                                                                                                                                                                                                                                                                                                                                                                                                                                                                                                                                      |                                                                                                                                                                                                                                                                                                                                         |
| GMO                                                                         | <input checked="" type="checkbox"/> No GMO bias                                                                                                                                                                                                                                                                                                                                                              |                                                                                                                                                                                                                                              |  |                                                                                                                                                                                                                                                                                                                                                                                                                                                                                                                                                                                      |                                                                                                                                                                                                                                                                                                                                         |

|                                                                                                 |                                                                                                                                                                                                                                                                                   |
|-------------------------------------------------------------------------------------------------|-----------------------------------------------------------------------------------------------------------------------------------------------------------------------------------------------------------------------------------------------------------------------------------|
|                                                                                                 | <input type="checkbox"/> GMO specific                                                                                                                                                                                                                                             |
| <b>METHODOLOGY</b>                                                                              |                                                                                                                                                                                                                                                                                   |
| Observations                                                                                    | <input checked="" type="checkbox"/> Reported, verifiable methodology<br><input type="checkbox"/> Reported, unverifiable methodology<br><input type="checkbox"/> Unknown, unverifiable methodology                                                                                 |
| Frequency                                                                                       | <input checked="" type="checkbox"/> > 1 time/year<br><input type="checkbox"/> 1 time/year<br><input type="checkbox"/> < 1 time/year                                                                                                                                               |
| Future                                                                                          | <input checked="" type="checkbox"/> For ≥ 5 years<br><input type="checkbox"/> between 1 and 5 years<br><input type="checkbox"/> no prospect                                                                                                                                       |
| Quality of performers                                                                           | <input type="checkbox"/> Trained, professionals<br><input checked="" type="checkbox"/> Trained, non-professionals – training by documentation, volunteers<br><input type="checkbox"/> Uncertain or not -specified                                                                 |
| Quality of data                                                                                 | <input checked="" type="checkbox"/> Standard recording of raw data<br><input type="checkbox"/> Free recording of raw data<br><input type="checkbox"/> Anecdotic                                                                                                                   |
| Analysis                                                                                        | <input checked="" type="checkbox"/> Reported, verifiable methodology<br><input type="checkbox"/> Reported, unverifiable methodology<br><input type="checkbox"/> Unknown, unverifiable methodology                                                                                 |
| Quality of analysis                                                                             | <input checked="" type="checkbox"/> Scientifically based<br><input type="checkbox"/> Indicative only<br><input type="checkbox"/> Unknown                                                                                                                                          |
| <b>REPORTING</b>                                                                                |                                                                                                                                                                                                                                                                                   |
| Language                                                                                        | Reporting language(s): Dutch                                                                                                                                                                                                                                                      |
| Availability                                                                                    | <input type="checkbox"/> Scientific publication<br><input checked="" type="checkbox"/> Official report available on the internet or in other public forum<br><input checked="" type="checkbox"/> Official report available from network<br><input type="checkbox"/> Not available |
| Frequency                                                                                       | <input checked="" type="checkbox"/> ≥ 1 time/year – Last yearly reports dates 2006<br><input type="checkbox"/> < 1 time/year – Reports per species or on local findings; distribution maps                                                                                        |
| Historical reference                                                                            | <input checked="" type="checkbox"/> over ≥ 5 years<br><input type="checkbox"/> between 1 and 5 years<br><input type="checkbox"/> no historical analysis                                                                                                                           |
| <b>COMMENT(S)</b>                                                                               |                                                                                                                                                                                                                                                                                   |
| Monitoring network using selected species as representative indicators and as protection goals. |                                                                                                                                                                                                                                                                                   |

## GSEN-09-0042.00.3 NL – Zoogdierenvereniging

| EuropaBio's coordinated approach to General Surveillance: Existing Networks |                                                                                                                                                                                                                                                                                                                                                                                                              |                                                                                                                                                                                                                                              |  |                                                                                                                                                                                                                                                                                                                                                                                                                                                                                                                                                                                      |                                                                                                                                                                                                                                                                                                                                         |
|-----------------------------------------------------------------------------|--------------------------------------------------------------------------------------------------------------------------------------------------------------------------------------------------------------------------------------------------------------------------------------------------------------------------------------------------------------------------------------------------------------|----------------------------------------------------------------------------------------------------------------------------------------------------------------------------------------------------------------------------------------------|--|--------------------------------------------------------------------------------------------------------------------------------------------------------------------------------------------------------------------------------------------------------------------------------------------------------------------------------------------------------------------------------------------------------------------------------------------------------------------------------------------------------------------------------------------------------------------------------------|-----------------------------------------------------------------------------------------------------------------------------------------------------------------------------------------------------------------------------------------------------------------------------------------------------------------------------------------|
| <b>ORGANISATION</b>                                                         |                                                                                                                                                                                                                                                                                                                                                                                                              |                                                                                                                                                                                                                                              |  |                                                                                                                                                                                                                                                                                                                                                                                                                                                                                                                                                                                      |                                                                                                                                                                                                                                                                                                                                         |
| EuropaBio reference                                                         | GS-EN-09-0042                                                                                                                                                                                                                                                                                                                                                                                                |                                                                                                                                                                                                                                              |  |                                                                                                                                                                                                                                                                                                                                                                                                                                                                                                                                                                                      |                                                                                                                                                                                                                                                                                                                                         |
| Official name of the Network                                                | <b>Zoogdierenvereniging</b>                                                                                                                                                                                                                                                                                                                                                                                  |                                                                                                                                                                                                                                              |  |                                                                                                                                                                                                                                                                                                                                                                                                                                                                                                                                                                                      |                                                                                                                                                                                                                                                                                                                                         |
| Other names                                                                 | Dutch Mammal Society                                                                                                                                                                                                                                                                                                                                                                                         |                                                                                                                                                                                                                                              |  |                                                                                                                                                                                                                                                                                                                                                                                                                                                                                                                                                                                      |                                                                                                                                                                                                                                                                                                                                         |
| Type of organisation                                                        | Nature conservation<br>Founded 1952                                                                                                                                                                                                                                                                                                                                                                          |                                                                                                                                                                                                                                              |  |                                                                                                                                                                                                                                                                                                                                                                                                                                                                                                                                                                                      |                                                                                                                                                                                                                                                                                                                                         |
| Coordinates                                                                 | Oude Kraan 8<br>6811 LJ Arnhem<br><br>fax: 026-3704038<br>Email: zoogdier[at]zoogdierveniging.nl                                                                                                                                                                                                                                                                                                             |                                                                                                                                                                                                                                              |  |                                                                                                                                                                                                                                                                                                                                                                                                                                                                                                                                                                                      |                                                                                                                                                                                                                                                                                                                                         |
| Website                                                                     | <a href="http://www.zoogdierveniging.nl">http://www.zoogdierveniging.nl</a>                                                                                                                                                                                                                                                                                                                                  |                                                                                                                                                                                                                                              |  |                                                                                                                                                                                                                                                                                                                                                                                                                                                                                                                                                                                      |                                                                                                                                                                                                                                                                                                                                         |
| Funding                                                                     | Membership, donations                                                                                                                                                                                                                                                                                                                                                                                        |                                                                                                                                                                                                                                              |  |                                                                                                                                                                                                                                                                                                                                                                                                                                                                                                                                                                                      |                                                                                                                                                                                                                                                                                                                                         |
| Conflict of interest                                                        | -                                                                                                                                                                                                                                                                                                                                                                                                            |                                                                                                                                                                                                                                              |  |                                                                                                                                                                                                                                                                                                                                                                                                                                                                                                                                                                                      |                                                                                                                                                                                                                                                                                                                                         |
| Part of other network(s)                                                    | Collaboration with<br>Stichting VeldOnderzoek Flora en Fauna (VOFF) and<br>PSO (Platform of Organizations for Species Conservation)<br>Member of the 'Netwerk Ecologische Monitoring (NEM)'                                                                                                                                                                                                                  |                                                                                                                                                                                                                                              |  |                                                                                                                                                                                                                                                                                                                                                                                                                                                                                                                                                                                      |                                                                                                                                                                                                                                                                                                                                         |
| Grouping other network(s)                                                   | 9 species workgroups                                                                                                                                                                                                                                                                                                                                                                                         |                                                                                                                                                                                                                                              |  |                                                                                                                                                                                                                                                                                                                                                                                                                                                                                                                                                                                      |                                                                                                                                                                                                                                                                                                                                         |
| <b>MONITORING SUBJECT</b>                                                   |                                                                                                                                                                                                                                                                                                                                                                                                              |                                                                                                                                                                                                                                              |  |                                                                                                                                                                                                                                                                                                                                                                                                                                                                                                                                                                                      |                                                                                                                                                                                                                                                                                                                                         |
| Description                                                                 | Monitoring and collecting distribution data of mammals (including bats)                                                                                                                                                                                                                                                                                                                                      |                                                                                                                                                                                                                                              |  |                                                                                                                                                                                                                                                                                                                                                                                                                                                                                                                                                                                      |                                                                                                                                                                                                                                                                                                                                         |
| Protection goal(s) and/or influencing factor(s)                             | <input checked="" type="checkbox"/> Protection goal<br><br><input checked="" type="checkbox"/> Biodiversity: mammals<br><input type="checkbox"/> Human Health<br><input type="checkbox"/> Animal Health<br><input type="checkbox"/> Plant Health<br><input type="checkbox"/> Soil function<br><input type="checkbox"/> Water quality<br><input type="checkbox"/> Sustainable Agriculture                     | <input type="checkbox"/> Influencing factor<br><br><input type="checkbox"/> Agronomic practice<br><input type="checkbox"/> Plant protection<br><input type="checkbox"/> GMO cultivation<br><input type="checkbox"/> Environmental conditions |  |                                                                                                                                                                                                                                                                                                                                                                                                                                                                                                                                                                                      |                                                                                                                                                                                                                                                                                                                                         |
| Duplication of Farmer's questionnaire                                       | <input checked="" type="checkbox"/> No duplication<br><input type="checkbox"/> Partly duplication<br><input type="checkbox"/> Complete duplication                                                                                                                                                                                                                                                           |                                                                                                                                                                                                                                              |  |                                                                                                                                                                                                                                                                                                                                                                                                                                                                                                                                                                                      |                                                                                                                                                                                                                                                                                                                                         |
| <b>SPECIFICITY</b>                                                          |                                                                                                                                                                                                                                                                                                                                                                                                              |                                                                                                                                                                                                                                              |  |                                                                                                                                                                                                                                                                                                                                                                                                                                                                                                                                                                                      |                                                                                                                                                                                                                                                                                                                                         |
| Geography                                                                   | <input type="checkbox"/> EU -wide<br><br><input type="checkbox"/> Zone A – North<br><input type="checkbox"/> Denmark,<br><input type="checkbox"/> Estonia,<br><input type="checkbox"/> Latvia,<br><input type="checkbox"/> Lithuania,<br><input type="checkbox"/> Finland,<br><input type="checkbox"/> Sweden<br><br><input type="checkbox"/> Regional (specify)<br><input type="checkbox"/> Local (specify) |                                                                                                                                                                                                                                              |  | <input checked="" type="checkbox"/> Zone B – Centre:<br><input type="checkbox"/> Belgium,<br><input type="checkbox"/> Czech Republic<br><input type="checkbox"/> Germany,<br><input type="checkbox"/> Ireland,<br><input type="checkbox"/> Luxembourg,<br><input type="checkbox"/> Hungary,<br><input checked="" type="checkbox"/> Netherlands,<br><input type="checkbox"/> Austria,<br><input type="checkbox"/> Poland,<br><input type="checkbox"/> Romania,<br><input type="checkbox"/> Slovenia,<br><input type="checkbox"/> Slovakia,<br><input type="checkbox"/> United Kingdom | <input type="checkbox"/> Zone C – South<br><input type="checkbox"/> Bulgaria,<br><input type="checkbox"/> Greece,<br><input type="checkbox"/> Spain,<br><input type="checkbox"/> France,<br><input type="checkbox"/> Italy,<br><input type="checkbox"/> Cyprus,<br><input type="checkbox"/> Malta,<br><input type="checkbox"/> Portugal |
| Factors                                                                     | <input checked="" type="checkbox"/> Multiple species/items (specify): mammals<br><input type="checkbox"/> Single species/item (specify)                                                                                                                                                                                                                                                                      |                                                                                                                                                                                                                                              |  |                                                                                                                                                                                                                                                                                                                                                                                                                                                                                                                                                                                      |                                                                                                                                                                                                                                                                                                                                         |
| Crop                                                                        | <input checked="" type="checkbox"/> No specific crop(s)<br><input type="checkbox"/> Several crops (e.g. all cereals)<br><input type="checkbox"/> Single crop                                                                                                                                                                                                                                                 |                                                                                                                                                                                                                                              |  |                                                                                                                                                                                                                                                                                                                                                                                                                                                                                                                                                                                      |                                                                                                                                                                                                                                                                                                                                         |
| Trait /treatment                                                            | <input checked="" type="checkbox"/> No specific traits/treatments<br><input type="checkbox"/> Several traits/treatments<br><input type="checkbox"/> Single trait/treatment                                                                                                                                                                                                                                   |                                                                                                                                                                                                                                              |  |                                                                                                                                                                                                                                                                                                                                                                                                                                                                                                                                                                                      |                                                                                                                                                                                                                                                                                                                                         |
| GMO                                                                         | <input checked="" type="checkbox"/> No GMO bias                                                                                                                                                                                                                                                                                                                                                              |                                                                                                                                                                                                                                              |  |                                                                                                                                                                                                                                                                                                                                                                                                                                                                                                                                                                                      |                                                                                                                                                                                                                                                                                                                                         |

|                                                                                                                                                                        |                                                                                                                                                                                                                                                                                   |
|------------------------------------------------------------------------------------------------------------------------------------------------------------------------|-----------------------------------------------------------------------------------------------------------------------------------------------------------------------------------------------------------------------------------------------------------------------------------|
|                                                                                                                                                                        | <input type="checkbox"/> GMO specific                                                                                                                                                                                                                                             |
| <b>METHODOLOGY</b>                                                                                                                                                     |                                                                                                                                                                                                                                                                                   |
| Observations                                                                                                                                                           | <input checked="" type="checkbox"/> Reported, verifiable methodology<br><input type="checkbox"/> Reported, unverifiable methodology<br><input type="checkbox"/> Unknown, unverifiable methodology                                                                                 |
| Frequency                                                                                                                                                              | <input checked="" type="checkbox"/> > 1 time/year<br><input type="checkbox"/> 1 time/year<br><input type="checkbox"/> < 1 time/year                                                                                                                                               |
| Future                                                                                                                                                                 | <input checked="" type="checkbox"/> For $\geq$ 5 years<br><input type="checkbox"/> between 1 and 5 years<br><input type="checkbox"/> no prospect                                                                                                                                  |
| Quality of performers                                                                                                                                                  | <input type="checkbox"/> Trained, professionals<br><input checked="" type="checkbox"/> Trained, non-professionals – training by documentation, volunteers<br><input type="checkbox"/> Uncertain or not -specified                                                                 |
| Quality of data                                                                                                                                                        | <input checked="" type="checkbox"/> Standard recording of raw data<br><input type="checkbox"/> Free recording of raw data<br><input type="checkbox"/> Anecdotic                                                                                                                   |
| Analysis                                                                                                                                                               | <input checked="" type="checkbox"/> Reported, verifiable methodology<br><input type="checkbox"/> Reported, unverifiable methodology<br><input type="checkbox"/> Unknown, unverifiable methodology                                                                                 |
| Quality of analysis                                                                                                                                                    | <input checked="" type="checkbox"/> Scientifically based<br><input type="checkbox"/> Indicative only<br><input type="checkbox"/> Unknown                                                                                                                                          |
| <b>REPORTING</b>                                                                                                                                                       |                                                                                                                                                                                                                                                                                   |
| Language                                                                                                                                                               | Reporting language(s): Dutch                                                                                                                                                                                                                                                      |
| Availability                                                                                                                                                           | <input type="checkbox"/> Scientific publication<br><input checked="" type="checkbox"/> Official report available on the internet or in other public forum<br><input checked="" type="checkbox"/> Official report available from network<br><input type="checkbox"/> Not available |
| Frequency                                                                                                                                                              | <input checked="" type="checkbox"/> $\geq$ 1 time/year –<br><input checked="" type="checkbox"/> < 1 time/year –                                                                                                                                                                   |
| Historical reference                                                                                                                                                   | <input checked="" type="checkbox"/> over $\geq$ 5 years<br><input type="checkbox"/> between 1 and 5 years<br><input type="checkbox"/> no historical analysis                                                                                                                      |
| <b>COMMENT(S)</b>                                                                                                                                                      |                                                                                                                                                                                                                                                                                   |
| Monitoring network using selected species as representative indicators and as protection goals. Several publications, are only accessible for members or upon payment. |                                                                                                                                                                                                                                                                                   |

## Poland

## GSEN-09-0101.00.2 PL – IOP

| EuropaBio's coordinated approach to General Surveillance: Existing Networks |                                                                                                                                                                                                                                                                                                                                                                                      |                                                                                                                                                                                                                                                                                                                                                                                                                                                                                                                                         |                                                                                                                                                                                                                                                                                              |
|-----------------------------------------------------------------------------|--------------------------------------------------------------------------------------------------------------------------------------------------------------------------------------------------------------------------------------------------------------------------------------------------------------------------------------------------------------------------------------|-----------------------------------------------------------------------------------------------------------------------------------------------------------------------------------------------------------------------------------------------------------------------------------------------------------------------------------------------------------------------------------------------------------------------------------------------------------------------------------------------------------------------------------------|----------------------------------------------------------------------------------------------------------------------------------------------------------------------------------------------------------------------------------------------------------------------------------------------|
| <b>ORGANISATION</b>                                                         |                                                                                                                                                                                                                                                                                                                                                                                      |                                                                                                                                                                                                                                                                                                                                                                                                                                                                                                                                         |                                                                                                                                                                                                                                                                                              |
| EuropaBio reference                                                         | GS-EN-09-0101                                                                                                                                                                                                                                                                                                                                                                        |                                                                                                                                                                                                                                                                                                                                                                                                                                                                                                                                         |                                                                                                                                                                                                                                                                                              |
| Official name of the Network                                                | Instytutu Ochrony Przyrody Polskiej Akademii Nauk                                                                                                                                                                                                                                                                                                                                    |                                                                                                                                                                                                                                                                                                                                                                                                                                                                                                                                         |                                                                                                                                                                                                                                                                                              |
| Other names                                                                 | Institute of Nature Conservation Polish Academy of Sciences in Krakow                                                                                                                                                                                                                                                                                                                |                                                                                                                                                                                                                                                                                                                                                                                                                                                                                                                                         |                                                                                                                                                                                                                                                                                              |
| Type of organisation                                                        | Academic<br>Founded 1953                                                                                                                                                                                                                                                                                                                                                             |                                                                                                                                                                                                                                                                                                                                                                                                                                                                                                                                         |                                                                                                                                                                                                                                                                                              |
| Coordinates                                                                 | al. A. Mickiewicza 33<br>31-120 Krakow<br><br>Fax: (012) 632 24 32<br>Email: <a href="mailto:sekretariat[iop.krakow.pl">sekretariat[iop.krakow.pl</a>                                                                                                                                                                                                                                |                                                                                                                                                                                                                                                                                                                                                                                                                                                                                                                                         |                                                                                                                                                                                                                                                                                              |
| Website                                                                     | <a href="http://www.iop.krakow.pl/">http://www.iop.krakow.pl/</a>                                                                                                                                                                                                                                                                                                                    |                                                                                                                                                                                                                                                                                                                                                                                                                                                                                                                                         |                                                                                                                                                                                                                                                                                              |
| Funding                                                                     | public                                                                                                                                                                                                                                                                                                                                                                               |                                                                                                                                                                                                                                                                                                                                                                                                                                                                                                                                         |                                                                                                                                                                                                                                                                                              |
| Conflict of interest                                                        | -                                                                                                                                                                                                                                                                                                                                                                                    |                                                                                                                                                                                                                                                                                                                                                                                                                                                                                                                                         |                                                                                                                                                                                                                                                                                              |
| Part of other network(s)                                                    |                                                                                                                                                                                                                                                                                                                                                                                      |                                                                                                                                                                                                                                                                                                                                                                                                                                                                                                                                         |                                                                                                                                                                                                                                                                                              |
| Grouping other network(s)                                                   |                                                                                                                                                                                                                                                                                                                                                                                      |                                                                                                                                                                                                                                                                                                                                                                                                                                                                                                                                         |                                                                                                                                                                                                                                                                                              |
| <b>MONITORING SUBJECT</b>                                                   |                                                                                                                                                                                                                                                                                                                                                                                      |                                                                                                                                                                                                                                                                                                                                                                                                                                                                                                                                         |                                                                                                                                                                                                                                                                                              |
| Description                                                                 | Monitoring and collecting distribution data of (breeding) birds                                                                                                                                                                                                                                                                                                                      |                                                                                                                                                                                                                                                                                                                                                                                                                                                                                                                                         |                                                                                                                                                                                                                                                                                              |
| Protection goal(s) and/or influencing factor(s)                             | <input checked="" type="checkbox"/> Protection goal<br><input checked="" type="checkbox"/> Biodiversity: General<br><input type="checkbox"/> Human Health<br><input type="checkbox"/> Animal Health<br><input type="checkbox"/> Plant Health<br><input type="checkbox"/> Soil function<br><input type="checkbox"/> Water quality<br><input type="checkbox"/> Sustainable Agriculture | <input type="checkbox"/> Influencing factor<br><input type="checkbox"/> Agronomic practice<br><input type="checkbox"/> Plant protection<br><input type="checkbox"/> GMO cultivation<br><input type="checkbox"/> Environmental conditions                                                                                                                                                                                                                                                                                                |                                                                                                                                                                                                                                                                                              |
| Duplication of Farmer's questionnaire                                       | <input checked="" type="checkbox"/> No duplication<br><input type="checkbox"/> Partly duplication<br><input type="checkbox"/> Complete duplication                                                                                                                                                                                                                                   |                                                                                                                                                                                                                                                                                                                                                                                                                                                                                                                                         |                                                                                                                                                                                                                                                                                              |
| <b>SPECIFICITY</b>                                                          |                                                                                                                                                                                                                                                                                                                                                                                      |                                                                                                                                                                                                                                                                                                                                                                                                                                                                                                                                         |                                                                                                                                                                                                                                                                                              |
| Geography                                                                   | <input type="checkbox"/> EU -wide                                                                                                                                                                                                                                                                                                                                                    |                                                                                                                                                                                                                                                                                                                                                                                                                                                                                                                                         |                                                                                                                                                                                                                                                                                              |
|                                                                             | <input type="checkbox"/> Zone A – North                                                                                                                                                                                                                                                                                                                                              | <input checked="" type="checkbox"/> Zone B – Centre:                                                                                                                                                                                                                                                                                                                                                                                                                                                                                    | <input type="checkbox"/> Zone C – South                                                                                                                                                                                                                                                      |
|                                                                             | <input type="checkbox"/> Denmark,<br><input type="checkbox"/> Estonia,<br><input type="checkbox"/> Latvia,<br><input type="checkbox"/> Lithuania,<br><input type="checkbox"/> Finland,<br><input type="checkbox"/> Sweden                                                                                                                                                            | <input type="checkbox"/> Belgium,<br><input type="checkbox"/> Czech Republic<br><input type="checkbox"/> Germany,<br><input type="checkbox"/> Ireland,<br><input type="checkbox"/> Luxembourg,<br><input type="checkbox"/> Hungary,<br><input checked="" type="checkbox"/> Netherlands,<br><input type="checkbox"/> Austria,<br><input checked="" type="checkbox"/> Poland,<br><input type="checkbox"/> Romania,<br><input type="checkbox"/> Slovenia,<br><input type="checkbox"/> Slovakia,<br><input type="checkbox"/> United Kingdom | <input type="checkbox"/> Bulgaria,<br><input type="checkbox"/> Greece,<br><input type="checkbox"/> Spain,<br><input type="checkbox"/> France,<br><input type="checkbox"/> Italy,<br><input type="checkbox"/> Cyprus,<br><input type="checkbox"/> Malta,<br><input type="checkbox"/> Portugal |
|                                                                             | <input type="checkbox"/> Regional (specify)<br><input type="checkbox"/> Local (specify)                                                                                                                                                                                                                                                                                              |                                                                                                                                                                                                                                                                                                                                                                                                                                                                                                                                         |                                                                                                                                                                                                                                                                                              |
| Factors                                                                     | <input checked="" type="checkbox"/> Multiple species/items (specify): endangered species / Natura2000<br><input type="checkbox"/> Single species/item (specify)                                                                                                                                                                                                                      |                                                                                                                                                                                                                                                                                                                                                                                                                                                                                                                                         |                                                                                                                                                                                                                                                                                              |
| Crop                                                                        | <input checked="" type="checkbox"/> No specific crop(s)<br><input type="checkbox"/> Several crops (e.g. all cereals)<br><input type="checkbox"/> Single crop                                                                                                                                                                                                                         |                                                                                                                                                                                                                                                                                                                                                                                                                                                                                                                                         |                                                                                                                                                                                                                                                                                              |
| Trait /treatment                                                            | <input checked="" type="checkbox"/> No specific traits/treatments<br><input type="checkbox"/> Several traits/treatments<br><input type="checkbox"/> Single trait/treatment                                                                                                                                                                                                           |                                                                                                                                                                                                                                                                                                                                                                                                                                                                                                                                         |                                                                                                                                                                                                                                                                                              |
| GMO                                                                         | <input checked="" type="checkbox"/> No GMO bias<br><input type="checkbox"/> GMO specific                                                                                                                                                                                                                                                                                             |                                                                                                                                                                                                                                                                                                                                                                                                                                                                                                                                         |                                                                                                                                                                                                                                                                                              |
| <b>METHODOLOGY</b>                                                          |                                                                                                                                                                                                                                                                                                                                                                                      |                                                                                                                                                                                                                                                                                                                                                                                                                                                                                                                                         |                                                                                                                                                                                                                                                                                              |
| Observations                                                                | <input checked="" type="checkbox"/> Reported, verifiable methodology                                                                                                                                                                                                                                                                                                                 |                                                                                                                                                                                                                                                                                                                                                                                                                                                                                                                                         |                                                                                                                                                                                                                                                                                              |

|                                                                                                     |                                                                                                                                                                                                                                                                                   |
|-----------------------------------------------------------------------------------------------------|-----------------------------------------------------------------------------------------------------------------------------------------------------------------------------------------------------------------------------------------------------------------------------------|
|                                                                                                     | <input type="checkbox"/> Reported, unverifiable methodology<br><input type="checkbox"/> Unknown, unverifiable methodology                                                                                                                                                         |
| Frequency                                                                                           | <input checked="" type="checkbox"/> > 1 time/year<br><input checked="" type="checkbox"/> 1 time/year<br><input type="checkbox"/> < 1 time/year                                                                                                                                    |
| Future                                                                                              | <input checked="" type="checkbox"/> For ≥ 5 years<br><input type="checkbox"/> between 1 and 5 years<br><input type="checkbox"/> no prospect                                                                                                                                       |
| Quality of performers                                                                               | <input checked="" type="checkbox"/> Trained, professionals<br><input type="checkbox"/> Trained, non-professionals –<br><input type="checkbox"/> Uncertain or not -specified                                                                                                       |
| Quality of data                                                                                     | <input checked="" type="checkbox"/> Standard recording of raw data<br><input type="checkbox"/> Free recording of raw data<br><input type="checkbox"/> Anecdotic                                                                                                                   |
| Analysis                                                                                            | <input checked="" type="checkbox"/> Reported, verifiable methodology<br><input type="checkbox"/> Reported, unverifiable methodology<br><input type="checkbox"/> Unknown, unverifiable methodology                                                                                 |
| Quality of analysis                                                                                 | <input checked="" type="checkbox"/> Scientifically based<br><input type="checkbox"/> Indicative only<br><input type="checkbox"/> Unknown                                                                                                                                          |
| <b>REPORTING</b>                                                                                    |                                                                                                                                                                                                                                                                                   |
| Language                                                                                            | Reporting language(s): Polish                                                                                                                                                                                                                                                     |
| Availability                                                                                        | <input type="checkbox"/> Scientific publication<br><input checked="" type="checkbox"/> Official report available on the internet or in other public forum<br><input checked="" type="checkbox"/> Official report available from network<br><input type="checkbox"/> Not available |
| Frequency                                                                                           | <input checked="" type="checkbox"/> ≥ 1 time/year – Quarterly magazine; monitoring database; distribution maps accessible on internet<br><input checked="" type="checkbox"/> < 1 time/year – 2-year reports                                                                       |
| Historical reference                                                                                | <input checked="" type="checkbox"/> over ≥ 5 years<br><input type="checkbox"/> between 1 and 5 years<br><input type="checkbox"/> no historical analysis                                                                                                                           |
| <b>COMMENT(S)</b>                                                                                   |                                                                                                                                                                                                                                                                                   |
| Scientific research and education, combined with strong presence in nature conservation activities. |                                                                                                                                                                                                                                                                                   |

## GSEN-09-0103.00.2 PL – MODR

| EuropaBio's coordinated approach to General Surveillance: Existing Networks |                                                                                                                                                                                                                                                                                                                                                                             |                                                                                                                                                                                                                                                                                                                                                                                                                                                                                                                                         |                                                                                                                                                                                                                                                                                              |
|-----------------------------------------------------------------------------|-----------------------------------------------------------------------------------------------------------------------------------------------------------------------------------------------------------------------------------------------------------------------------------------------------------------------------------------------------------------------------|-----------------------------------------------------------------------------------------------------------------------------------------------------------------------------------------------------------------------------------------------------------------------------------------------------------------------------------------------------------------------------------------------------------------------------------------------------------------------------------------------------------------------------------------|----------------------------------------------------------------------------------------------------------------------------------------------------------------------------------------------------------------------------------------------------------------------------------------------|
| <b>ORGANISATION</b>                                                         |                                                                                                                                                                                                                                                                                                                                                                             |                                                                                                                                                                                                                                                                                                                                                                                                                                                                                                                                         |                                                                                                                                                                                                                                                                                              |
| EuropaBio reference                                                         | GS-EN-09-0103                                                                                                                                                                                                                                                                                                                                                               |                                                                                                                                                                                                                                                                                                                                                                                                                                                                                                                                         |                                                                                                                                                                                                                                                                                              |
| Official name of the Network                                                | <b>Mazowiecki Ośrodek Doradztwa Rolniczego W Warszawie</b>                                                                                                                                                                                                                                                                                                                  |                                                                                                                                                                                                                                                                                                                                                                                                                                                                                                                                         |                                                                                                                                                                                                                                                                                              |
| Other names                                                                 | Mazowiecki Agricultural Advisory Center In Warsaw (MODR)                                                                                                                                                                                                                                                                                                                    |                                                                                                                                                                                                                                                                                                                                                                                                                                                                                                                                         |                                                                                                                                                                                                                                                                                              |
| Type of organisation                                                        | Governmental<br>Founded 1911                                                                                                                                                                                                                                                                                                                                                |                                                                                                                                                                                                                                                                                                                                                                                                                                                                                                                                         |                                                                                                                                                                                                                                                                                              |
| Coordinates                                                                 | Ul. Czereśniowa 98<br>02-456 Warszawa,<br><br>Fax. 022 571 61 01<br>Email: <a href="mailto:sekretariat[at]modr.mazowsze.pl">sekretariat[at]modr.mazowsze.pl</a>                                                                                                                                                                                                             |                                                                                                                                                                                                                                                                                                                                                                                                                                                                                                                                         |                                                                                                                                                                                                                                                                                              |
| Website                                                                     | <a href="http://www.modr.mazowsze.pl/">http://www.modr.mazowsze.pl/</a>                                                                                                                                                                                                                                                                                                     |                                                                                                                                                                                                                                                                                                                                                                                                                                                                                                                                         |                                                                                                                                                                                                                                                                                              |
| Funding                                                                     | public                                                                                                                                                                                                                                                                                                                                                                      |                                                                                                                                                                                                                                                                                                                                                                                                                                                                                                                                         |                                                                                                                                                                                                                                                                                              |
| Conflict of interest                                                        | -                                                                                                                                                                                                                                                                                                                                                                           |                                                                                                                                                                                                                                                                                                                                                                                                                                                                                                                                         |                                                                                                                                                                                                                                                                                              |
| Part of other network(s)                                                    |                                                                                                                                                                                                                                                                                                                                                                             |                                                                                                                                                                                                                                                                                                                                                                                                                                                                                                                                         |                                                                                                                                                                                                                                                                                              |
| Grouping other network(s)                                                   |                                                                                                                                                                                                                                                                                                                                                                             |                                                                                                                                                                                                                                                                                                                                                                                                                                                                                                                                         |                                                                                                                                                                                                                                                                                              |
| <b>MONITORING SUBJECT</b>                                                   |                                                                                                                                                                                                                                                                                                                                                                             |                                                                                                                                                                                                                                                                                                                                                                                                                                                                                                                                         |                                                                                                                                                                                                                                                                                              |
| Description                                                                 | Consultative activities mainly focused on improving the competitiveness of Polish agricultural sector, improving working and living conditions in the Polish countryside, raising the professional qualifications of people in rural areas voivodship.                                                                                                                      |                                                                                                                                                                                                                                                                                                                                                                                                                                                                                                                                         |                                                                                                                                                                                                                                                                                              |
| Protection goal(s) and/or influencing factor(s)                             | <input checked="" type="checkbox"/> Protection goal<br><input type="checkbox"/> Biodiversity<br><input type="checkbox"/> Human Health<br><input type="checkbox"/> Animal Health<br><input type="checkbox"/> Plant Health<br><input type="checkbox"/> Soil function<br><input type="checkbox"/> Water quality<br><input checked="" type="checkbox"/> Sustainable Agriculture | <input checked="" type="checkbox"/> Influencing factor<br><input checked="" type="checkbox"/> Agronomic practice<br><input type="checkbox"/> Plant protection<br><input type="checkbox"/> GMO cultivation<br><input type="checkbox"/> Environmental conditions                                                                                                                                                                                                                                                                          |                                                                                                                                                                                                                                                                                              |
| Duplication of Farmer's questionnaire                                       | <input checked="" type="checkbox"/> No duplication<br><input type="checkbox"/> Partly duplication<br><input type="checkbox"/> Complete duplication                                                                                                                                                                                                                          |                                                                                                                                                                                                                                                                                                                                                                                                                                                                                                                                         |                                                                                                                                                                                                                                                                                              |
| <b>SPECIFICITY</b>                                                          |                                                                                                                                                                                                                                                                                                                                                                             |                                                                                                                                                                                                                                                                                                                                                                                                                                                                                                                                         |                                                                                                                                                                                                                                                                                              |
| Geography                                                                   | <input type="checkbox"/> EU -wide                                                                                                                                                                                                                                                                                                                                           |                                                                                                                                                                                                                                                                                                                                                                                                                                                                                                                                         |                                                                                                                                                                                                                                                                                              |
|                                                                             | <input type="checkbox"/> Zone A – North                                                                                                                                                                                                                                                                                                                                     | <input checked="" type="checkbox"/> Zone B – Centre:                                                                                                                                                                                                                                                                                                                                                                                                                                                                                    | <input type="checkbox"/> Zone C – South                                                                                                                                                                                                                                                      |
|                                                                             | <input type="checkbox"/> Denmark,<br><input type="checkbox"/> Estonia,<br><input type="checkbox"/> Latvia,<br><input type="checkbox"/> Lithuania,<br><input type="checkbox"/> Finland,<br><input type="checkbox"/> Sweden                                                                                                                                                   | <input type="checkbox"/> Belgium,<br><input type="checkbox"/> Czech Republic<br><input type="checkbox"/> Germany,<br><input type="checkbox"/> Ireland,<br><input type="checkbox"/> Luxembourg,<br><input type="checkbox"/> Hungary,<br><input checked="" type="checkbox"/> Netherlands,<br><input type="checkbox"/> Austria,<br><input checked="" type="checkbox"/> Poland,<br><input type="checkbox"/> Romania,<br><input type="checkbox"/> Slovenia,<br><input type="checkbox"/> Slovakia,<br><input type="checkbox"/> United Kingdom | <input type="checkbox"/> Bulgaria,<br><input type="checkbox"/> Greece,<br><input type="checkbox"/> Spain,<br><input type="checkbox"/> France,<br><input type="checkbox"/> Italy,<br><input type="checkbox"/> Cyprus,<br><input type="checkbox"/> Malta,<br><input type="checkbox"/> Portugal |
|                                                                             | <input type="checkbox"/> Regional (specify)<br><input type="checkbox"/> Local (specify)                                                                                                                                                                                                                                                                                     |                                                                                                                                                                                                                                                                                                                                                                                                                                                                                                                                         |                                                                                                                                                                                                                                                                                              |
| Factors                                                                     | <input checked="" type="checkbox"/> Multiple species/items (specify): agronomic parameters<br><input type="checkbox"/> Single species/item (specify)                                                                                                                                                                                                                        |                                                                                                                                                                                                                                                                                                                                                                                                                                                                                                                                         |                                                                                                                                                                                                                                                                                              |
| Crop                                                                        | <input type="checkbox"/> No specific crop(s)<br><input checked="" type="checkbox"/> Several crops (e.g. all cereals)<br><input type="checkbox"/> Single crop                                                                                                                                                                                                                |                                                                                                                                                                                                                                                                                                                                                                                                                                                                                                                                         |                                                                                                                                                                                                                                                                                              |
| Trait /treatment                                                            | <input checked="" type="checkbox"/> No specific traits/treatments<br><input type="checkbox"/> Several traits/treatments<br><input type="checkbox"/> Single trait/treatment                                                                                                                                                                                                  |                                                                                                                                                                                                                                                                                                                                                                                                                                                                                                                                         |                                                                                                                                                                                                                                                                                              |
| GMO                                                                         | <input checked="" type="checkbox"/> No GMO bias<br><input type="checkbox"/> GMO specific                                                                                                                                                                                                                                                                                    |                                                                                                                                                                                                                                                                                                                                                                                                                                                                                                                                         |                                                                                                                                                                                                                                                                                              |
| <b>METHODOLOGY</b>                                                          |                                                                                                                                                                                                                                                                                                                                                                             |                                                                                                                                                                                                                                                                                                                                                                                                                                                                                                                                         |                                                                                                                                                                                                                                                                                              |



|                                                                                                                                                                                            |                                                                                                                                                                                                                                                             |
|--------------------------------------------------------------------------------------------------------------------------------------------------------------------------------------------|-------------------------------------------------------------------------------------------------------------------------------------------------------------------------------------------------------------------------------------------------------------|
| Observations                                                                                                                                                                               | <input type="checkbox"/> Reported, verifiable methodology<br><input type="checkbox"/> Reported, unverifiable methodology<br><input type="checkbox"/> Unknown, unverifiable methodology                                                                      |
| Frequency                                                                                                                                                                                  | <input type="checkbox"/> > 1 time/year<br><input type="checkbox"/> 1 time/year<br><input type="checkbox"/> < 1 time/year                                                                                                                                    |
| Future                                                                                                                                                                                     | <input type="checkbox"/> For $\geq 5$ years<br><input type="checkbox"/> between 1 and 5 years<br><input type="checkbox"/> no prospect                                                                                                                       |
| Quality of performers                                                                                                                                                                      | <input type="checkbox"/> Trained, professionals<br><input type="checkbox"/> Trained, non-professionals<br><input type="checkbox"/> Uncertain or not -specified                                                                                              |
| Quality of data                                                                                                                                                                            | <input type="checkbox"/> Standard recording of raw data<br><input type="checkbox"/> Free recording of raw data<br><input type="checkbox"/> Anecdotic                                                                                                        |
| Analysis                                                                                                                                                                                   | <input type="checkbox"/> Reported, verifiable methodology<br><input type="checkbox"/> Reported, unverifiable methodology<br><input type="checkbox"/> Unknown, unverifiable methodology                                                                      |
| Quality of analysis                                                                                                                                                                        | <input type="checkbox"/> Scientifically based<br><input type="checkbox"/> Indicative only<br><input type="checkbox"/> Unknown                                                                                                                               |
| <b>REPORTING</b>                                                                                                                                                                           |                                                                                                                                                                                                                                                             |
| Language                                                                                                                                                                                   | Reporting language(s): Polish                                                                                                                                                                                                                               |
| Availability                                                                                                                                                                               | <input type="checkbox"/> Scientific publication<br><input type="checkbox"/> Official report available on the internet or in other public forum<br><input type="checkbox"/> Official report available from network<br><input type="checkbox"/> Not available |
| Frequency                                                                                                                                                                                  | <input type="checkbox"/> $\geq 1$ time/year – Quarterly magazine; monitoring database; distribution maps accessible on internet<br><input type="checkbox"/> < 1 time/year – 2-year reports                                                                  |
| Historical reference                                                                                                                                                                       | <input type="checkbox"/> over $\geq 5$ years<br><input type="checkbox"/> between 1 and 5 years<br><input type="checkbox"/> no historical analysis                                                                                                           |
| <b>COMMENT(S)</b>                                                                                                                                                                          |                                                                                                                                                                                                                                                             |
| Brochures, flyers, catalogues, folders, conference materials and other non-periodical publications of professional topics. Some publications only available to members or by subscription. |                                                                                                                                                                                                                                                             |

## GSEN-09-0104.00.2 PL – OTOP

| EuropaBio's coordinated approach to General Surveillance: Existing Networks |                                                                                                                                                                                                                                                                                                                                                                                                                                                                                                                                                                                                 |                                                                                                                                                                                                                                                                                                                                         |  |
|-----------------------------------------------------------------------------|-------------------------------------------------------------------------------------------------------------------------------------------------------------------------------------------------------------------------------------------------------------------------------------------------------------------------------------------------------------------------------------------------------------------------------------------------------------------------------------------------------------------------------------------------------------------------------------------------|-----------------------------------------------------------------------------------------------------------------------------------------------------------------------------------------------------------------------------------------------------------------------------------------------------------------------------------------|--|
| <b>ORGANISATION</b>                                                         |                                                                                                                                                                                                                                                                                                                                                                                                                                                                                                                                                                                                 |                                                                                                                                                                                                                                                                                                                                         |  |
| EuropaBio reference                                                         | GS-EN-09-0104                                                                                                                                                                                                                                                                                                                                                                                                                                                                                                                                                                                   |                                                                                                                                                                                                                                                                                                                                         |  |
| Official name of the Network                                                | <b>Ogólnopolskie Towarzystwo Ochrony Ptaków</b>                                                                                                                                                                                                                                                                                                                                                                                                                                                                                                                                                 |                                                                                                                                                                                                                                                                                                                                         |  |
| Other names                                                                 | OTOP, National Society for the Protection of Birds                                                                                                                                                                                                                                                                                                                                                                                                                                                                                                                                              |                                                                                                                                                                                                                                                                                                                                         |  |
| Type of organisation                                                        | Nature conservation<br>Founded 1991                                                                                                                                                                                                                                                                                                                                                                                                                                                                                                                                                             |                                                                                                                                                                                                                                                                                                                                         |  |
| Coordinates                                                                 | Headquarters OTOP<br>st. Milwaukee, WI, 24<br>05-270 Marki<br><br>Fax: 0-22 761 90 51<br>Email: <a href="mailto:office[at]otop.org.pl">office[at]otop.org.pl</a>                                                                                                                                                                                                                                                                                                                                                                                                                                |                                                                                                                                                                                                                                                                                                                                         |  |
| Website                                                                     | <a href="http://www.otop.org.pl/">http://www.otop.org.pl/</a>                                                                                                                                                                                                                                                                                                                                                                                                                                                                                                                                   |                                                                                                                                                                                                                                                                                                                                         |  |
| Funding                                                                     | members<br>grants, donations, bequests and legacies<br>income from business activities and assets of the Society                                                                                                                                                                                                                                                                                                                                                                                                                                                                                |                                                                                                                                                                                                                                                                                                                                         |  |
| Conflict of interest                                                        | -                                                                                                                                                                                                                                                                                                                                                                                                                                                                                                                                                                                               |                                                                                                                                                                                                                                                                                                                                         |  |
| Part of other network(s)                                                    | affiliated with BirdLife International                                                                                                                                                                                                                                                                                                                                                                                                                                                                                                                                                          |                                                                                                                                                                                                                                                                                                                                         |  |
| Grouping other network(s)                                                   | several local groups                                                                                                                                                                                                                                                                                                                                                                                                                                                                                                                                                                            |                                                                                                                                                                                                                                                                                                                                         |  |
| <b>MONITORING SUBJECT</b>                                                   |                                                                                                                                                                                                                                                                                                                                                                                                                                                                                                                                                                                                 |                                                                                                                                                                                                                                                                                                                                         |  |
| Description                                                                 | Monitoring and collecting distribution data of (breeding) birds                                                                                                                                                                                                                                                                                                                                                                                                                                                                                                                                 |                                                                                                                                                                                                                                                                                                                                         |  |
| Protection goal(s) and/or influencing factor(s)                             | <input checked="" type="checkbox"/> Protection goal<br><br><input checked="" type="checkbox"/> Biodiversity: Birds<br><input type="checkbox"/> Human Health<br><input type="checkbox"/> Animal Health<br><input type="checkbox"/> Plant Health<br><input type="checkbox"/> Soil function<br><input type="checkbox"/> Water quality<br><input type="checkbox"/> Sustainable Agriculture                                                                                                                                                                                                          | <input type="checkbox"/> Influencing factor<br><br><input type="checkbox"/> Agronomic practice<br><input type="checkbox"/> Plant protection<br><input type="checkbox"/> GMO cultivation<br><input type="checkbox"/> Environmental conditions                                                                                            |  |
| Duplication of Farmer's questionnaire                                       | <input checked="" type="checkbox"/> No duplication<br><input type="checkbox"/> Partly duplication<br><input type="checkbox"/> Complete duplication                                                                                                                                                                                                                                                                                                                                                                                                                                              |                                                                                                                                                                                                                                                                                                                                         |  |
| <b>SPECIFICITY</b>                                                          |                                                                                                                                                                                                                                                                                                                                                                                                                                                                                                                                                                                                 |                                                                                                                                                                                                                                                                                                                                         |  |
| Geography                                                                   | <input type="checkbox"/> EU -wide<br><br><input type="checkbox"/> Zone A – North<br><input type="checkbox"/> Denmark,<br><input type="checkbox"/> Estonia,<br><input type="checkbox"/> Latvia,<br><input type="checkbox"/> Lithuania,<br><input type="checkbox"/> Finland,<br><input type="checkbox"/> Sweden                                                                                                                                                                                                                                                                                   |                                                                                                                                                                                                                                                                                                                                         |  |
|                                                                             | <input checked="" type="checkbox"/> Zone B – Centre:<br><input type="checkbox"/> Belgium,<br><input type="checkbox"/> Czech Republic<br><input type="checkbox"/> Germany,<br><input type="checkbox"/> Ireland,<br><input type="checkbox"/> Luxembourg,<br><input type="checkbox"/> Hungary,<br><input checked="" type="checkbox"/> Netherlands,<br><input type="checkbox"/> Austria,<br><input checked="" type="checkbox"/> Poland,<br><input type="checkbox"/> Romania,<br><input type="checkbox"/> Slovenia,<br><input type="checkbox"/> Slovakia,<br><input type="checkbox"/> United Kingdom | <input type="checkbox"/> Zone C – South<br><input type="checkbox"/> Bulgaria,<br><input type="checkbox"/> Greece,<br><input type="checkbox"/> Spain,<br><input type="checkbox"/> France,<br><input type="checkbox"/> Italy,<br><input type="checkbox"/> Cyprus,<br><input type="checkbox"/> Malta,<br><input type="checkbox"/> Portugal |  |
|                                                                             | <input type="checkbox"/> Regional (specify)<br><input type="checkbox"/> Local (specify)                                                                                                                                                                                                                                                                                                                                                                                                                                                                                                         |                                                                                                                                                                                                                                                                                                                                         |  |
| Factors                                                                     | <input checked="" type="checkbox"/> Multiple species/items (specify): 170 bird species<br><input type="checkbox"/> Single species/item (specify)                                                                                                                                                                                                                                                                                                                                                                                                                                                |                                                                                                                                                                                                                                                                                                                                         |  |
| Crop                                                                        | <input checked="" type="checkbox"/> No specific crop(s)<br><input type="checkbox"/> Several crops (e.g. all cereals)<br><input type="checkbox"/> Single crop                                                                                                                                                                                                                                                                                                                                                                                                                                    |                                                                                                                                                                                                                                                                                                                                         |  |
| Trait /treatment                                                            | <input checked="" type="checkbox"/> No specific traits/treatments<br><input type="checkbox"/> Several traits/treatments<br><input type="checkbox"/> Single trait/treatment                                                                                                                                                                                                                                                                                                                                                                                                                      |                                                                                                                                                                                                                                                                                                                                         |  |
| GMO                                                                         | <input checked="" type="checkbox"/> No GMO bias<br><input type="checkbox"/> GMO specific                                                                                                                                                                                                                                                                                                                                                                                                                                                                                                        |                                                                                                                                                                                                                                                                                                                                         |  |

| <b>METHODOLOGY</b>                                                                              |                                                                                                                                                                                                                                                                                   |
|-------------------------------------------------------------------------------------------------|-----------------------------------------------------------------------------------------------------------------------------------------------------------------------------------------------------------------------------------------------------------------------------------|
| Observations                                                                                    | <input checked="" type="checkbox"/> Reported, verifiable methodology<br><input type="checkbox"/> Reported, unverifiable methodology<br><input type="checkbox"/> Unknown, unverifiable methodology                                                                                 |
| Frequency                                                                                       | <input checked="" type="checkbox"/> > 1 time/year<br><input checked="" type="checkbox"/> 1 time/year<br><input type="checkbox"/> < 1 time/year                                                                                                                                    |
| Future                                                                                          | <input checked="" type="checkbox"/> For ≥ 5 years<br><input type="checkbox"/> between 1 and 5 years<br><input type="checkbox"/> no prospect                                                                                                                                       |
| Quality of performers                                                                           | <input type="checkbox"/> Trained, professionals<br><input checked="" type="checkbox"/> Trained, non-professionals – 17 regional coordinators, more than 300 highly skilled bird-watchers<br><input type="checkbox"/> Uncertain or not -specified                                  |
| Quality of data                                                                                 | <input checked="" type="checkbox"/> Standard recording of raw data<br><input type="checkbox"/> Free recording of raw data<br><input type="checkbox"/> Anecdotic                                                                                                                   |
| Analysis                                                                                        | <input checked="" type="checkbox"/> Reported, verifiable methodology<br><input type="checkbox"/> Reported, unverifiable methodology<br><input type="checkbox"/> Unknown, unverifiable methodology                                                                                 |
| Quality of analysis                                                                             | <input checked="" type="checkbox"/> Scientifically based<br><input type="checkbox"/> Indicative only<br><input type="checkbox"/> Unknown                                                                                                                                          |
| <b>REPORTING</b>                                                                                |                                                                                                                                                                                                                                                                                   |
| Language                                                                                        | Reporting language(s): Polish                                                                                                                                                                                                                                                     |
| Availability                                                                                    | <input type="checkbox"/> Scientific publication<br><input checked="" type="checkbox"/> Official report available on the internet or in other public forum<br><input checked="" type="checkbox"/> Official report available from network<br><input type="checkbox"/> Not available |
| Frequency                                                                                       | <input checked="" type="checkbox"/> ≥ 1 time/year – Quarterly magazine; monitoring database; distribution maps accessible on internet<br><input checked="" type="checkbox"/> < 1 time/year – 2-year reports                                                                       |
| Historical reference                                                                            | <input checked="" type="checkbox"/> over ≥ 5 years<br><input type="checkbox"/> between 1 and 5 years<br><input type="checkbox"/> no historical analysis                                                                                                                           |
| <b>COMMENT(S)</b>                                                                               |                                                                                                                                                                                                                                                                                   |
| Monitoring network using selected species as representative indicators and as protection goals. |                                                                                                                                                                                                                                                                                   |

## Portugal

## GSEN-09-0205.00.1 PT – ASEA

| EuropaBio's coordinated approach to General Surveillance: Existing Networks |                                                                                                                                                                                                                                                                                                                                                                                        |                                                                                                                                                                                                                                                                                                                                                                                                                                                                                                                   |                                                                                                                                                                                                                                                                                                         |
|-----------------------------------------------------------------------------|----------------------------------------------------------------------------------------------------------------------------------------------------------------------------------------------------------------------------------------------------------------------------------------------------------------------------------------------------------------------------------------|-------------------------------------------------------------------------------------------------------------------------------------------------------------------------------------------------------------------------------------------------------------------------------------------------------------------------------------------------------------------------------------------------------------------------------------------------------------------------------------------------------------------|---------------------------------------------------------------------------------------------------------------------------------------------------------------------------------------------------------------------------------------------------------------------------------------------------------|
| <b>ORGANISATION</b>                                                         |                                                                                                                                                                                                                                                                                                                                                                                        |                                                                                                                                                                                                                                                                                                                                                                                                                                                                                                                   |                                                                                                                                                                                                                                                                                                         |
| EuropaBio reference                                                         | GS-EN-09-0205                                                                                                                                                                                                                                                                                                                                                                          |                                                                                                                                                                                                                                                                                                                                                                                                                                                                                                                   |                                                                                                                                                                                                                                                                                                         |
| Official name of the Network                                                | <b>Agência Portuguesa de Segurança Alimentar.<br/>Autoridade de Segurança Alimentar e Económica (ASEA)</b>                                                                                                                                                                                                                                                                             |                                                                                                                                                                                                                                                                                                                                                                                                                                                                                                                   |                                                                                                                                                                                                                                                                                                         |
| Other names                                                                 | Portuguese agency for food quality                                                                                                                                                                                                                                                                                                                                                     |                                                                                                                                                                                                                                                                                                                                                                                                                                                                                                                   |                                                                                                                                                                                                                                                                                                         |
| Type of organisation                                                        | Governmental<br>Founded 2000                                                                                                                                                                                                                                                                                                                                                           |                                                                                                                                                                                                                                                                                                                                                                                                                                                                                                                   |                                                                                                                                                                                                                                                                                                         |
| Coordinates                                                                 | Rua Rodrigo da Fonseca, n° 73<br>1269-274 Lisboa<br><br>Fax: 217 983 654                                                                                                                                                                                                                                                                                                               |                                                                                                                                                                                                                                                                                                                                                                                                                                                                                                                   |                                                                                                                                                                                                                                                                                                         |
| Website                                                                     | <a href="http://www.asae.pt">www.asae.pt</a>                                                                                                                                                                                                                                                                                                                                           |                                                                                                                                                                                                                                                                                                                                                                                                                                                                                                                   |                                                                                                                                                                                                                                                                                                         |
| Funding                                                                     | Government                                                                                                                                                                                                                                                                                                                                                                             |                                                                                                                                                                                                                                                                                                                                                                                                                                                                                                                   |                                                                                                                                                                                                                                                                                                         |
| Conflict of interest                                                        | -                                                                                                                                                                                                                                                                                                                                                                                      |                                                                                                                                                                                                                                                                                                                                                                                                                                                                                                                   |                                                                                                                                                                                                                                                                                                         |
| Part of other network(s)                                                    | Affiliation with European RASFF not confirmed                                                                                                                                                                                                                                                                                                                                          |                                                                                                                                                                                                                                                                                                                                                                                                                                                                                                                   |                                                                                                                                                                                                                                                                                                         |
| Grouping other network(s)                                                   | Alert system managed by Portuguese Authority for Food Security and Economy (Ministry of Economy, Innovation and Development)                                                                                                                                                                                                                                                           |                                                                                                                                                                                                                                                                                                                                                                                                                                                                                                                   |                                                                                                                                                                                                                                                                                                         |
| <b>MONITORING SUBJECT</b>                                                   |                                                                                                                                                                                                                                                                                                                                                                                        |                                                                                                                                                                                                                                                                                                                                                                                                                                                                                                                   |                                                                                                                                                                                                                                                                                                         |
| Description                                                                 | Provide food and feed control authorities with an effective tool to exchange information about measures taken responding to serious risks detected in relation to food or feed.                                                                                                                                                                                                        |                                                                                                                                                                                                                                                                                                                                                                                                                                                                                                                   |                                                                                                                                                                                                                                                                                                         |
| Protection goal(s) and/or influencing factor(s)                             | <input checked="" type="checkbox"/> Protection goal<br><input type="checkbox"/> Biodiversity<br><input checked="" type="checkbox"/> Human Health<br><input checked="" type="checkbox"/> Animal Health<br><input type="checkbox"/> Plant Health<br><input type="checkbox"/> Soil function<br><input type="checkbox"/> Water quality<br><input type="checkbox"/> Sustainable Agriculture | <input type="checkbox"/> Influencing factor<br><input type="checkbox"/> Agronomic practice<br><input type="checkbox"/> Plant protection<br><input type="checkbox"/> GMO cultivation<br><input type="checkbox"/> Environmental conditions                                                                                                                                                                                                                                                                          |                                                                                                                                                                                                                                                                                                         |
| Duplication of Farmer's questionnaire                                       | <input checked="" type="checkbox"/> No duplication<br><input type="checkbox"/> Partly duplication<br><input type="checkbox"/> Complete duplication                                                                                                                                                                                                                                     |                                                                                                                                                                                                                                                                                                                                                                                                                                                                                                                   |                                                                                                                                                                                                                                                                                                         |
| <b>SPECIFICITY</b>                                                          |                                                                                                                                                                                                                                                                                                                                                                                        |                                                                                                                                                                                                                                                                                                                                                                                                                                                                                                                   |                                                                                                                                                                                                                                                                                                         |
| Geography                                                                   | <input type="checkbox"/> EU -wide<br><input type="checkbox"/> Zone A – North<br><input type="checkbox"/> Zone B – Centre:<br><input type="checkbox"/> Zone C – South                                                                                                                                                                                                                   |                                                                                                                                                                                                                                                                                                                                                                                                                                                                                                                   |                                                                                                                                                                                                                                                                                                         |
|                                                                             | <input type="checkbox"/> Denmark,<br><input type="checkbox"/> Estonia,<br><input type="checkbox"/> Latvia,<br><input type="checkbox"/> Lithuania,<br><input type="checkbox"/> Finland,<br><input type="checkbox"/> Sweden                                                                                                                                                              | <input type="checkbox"/> Belgium,<br><input type="checkbox"/> Czech Republic<br><input type="checkbox"/> Germany,<br><input type="checkbox"/> Ireland,<br><input type="checkbox"/> Luxembourg,<br><input type="checkbox"/> Hungary,<br><input type="checkbox"/> Netherlands,<br><input type="checkbox"/> Austria,<br><input type="checkbox"/> Poland,<br><input type="checkbox"/> Romania,<br><input type="checkbox"/> Slovenia,<br><input type="checkbox"/> Slovakia,<br><input type="checkbox"/> United Kingdom | <input type="checkbox"/> Bulgaria,<br><input type="checkbox"/> Greece,<br><input type="checkbox"/> Spain,<br><input type="checkbox"/> France,<br><input type="checkbox"/> Italy,<br><input type="checkbox"/> Cyprus,<br><input type="checkbox"/> Malta,<br><input checked="" type="checkbox"/> Portugal |
|                                                                             | <input type="checkbox"/> Regional (specify)<br><input type="checkbox"/> Local (specify)                                                                                                                                                                                                                                                                                                |                                                                                                                                                                                                                                                                                                                                                                                                                                                                                                                   |                                                                                                                                                                                                                                                                                                         |
| Factors                                                                     | <input checked="" type="checkbox"/> Multiple species/items (specify) any health effect<br><input type="checkbox"/> Single species/item (specify)                                                                                                                                                                                                                                       |                                                                                                                                                                                                                                                                                                                                                                                                                                                                                                                   |                                                                                                                                                                                                                                                                                                         |
| Crop                                                                        | <input checked="" type="checkbox"/> No specific crop(s)<br><input type="checkbox"/> Several crops (e.g. all cereals)<br><input type="checkbox"/> Single crop                                                                                                                                                                                                                           |                                                                                                                                                                                                                                                                                                                                                                                                                                                                                                                   |                                                                                                                                                                                                                                                                                                         |
| Trait /treatment                                                            | <input checked="" type="checkbox"/> No specific traits/treatments<br><input type="checkbox"/> Several traits/treatments<br><input type="checkbox"/> Single trait/treatment                                                                                                                                                                                                             |                                                                                                                                                                                                                                                                                                                                                                                                                                                                                                                   |                                                                                                                                                                                                                                                                                                         |
| GMO                                                                         | <input checked="" type="checkbox"/> No GMO bias<br><input type="checkbox"/> GMO specific                                                                                                                                                                                                                                                                                               |                                                                                                                                                                                                                                                                                                                                                                                                                                                                                                                   |                                                                                                                                                                                                                                                                                                         |
| <b>METHODOLOGY</b>                                                          |                                                                                                                                                                                                                                                                                                                                                                                        |                                                                                                                                                                                                                                                                                                                                                                                                                                                                                                                   |                                                                                                                                                                                                                                                                                                         |

|                                          |                                                                                                                                                                                                                                                             |
|------------------------------------------|-------------------------------------------------------------------------------------------------------------------------------------------------------------------------------------------------------------------------------------------------------------|
| Observations                             | <input type="checkbox"/> Reported, verifiable methodology<br><input type="checkbox"/> Reported, unverifiable methodology<br><input type="checkbox"/> Unknown, unverifiable methodology                                                                      |
| Frequency                                | <input type="checkbox"/> > 1 time/year<br><input type="checkbox"/> 1 time/year<br><input type="checkbox"/> < 1 time/year                                                                                                                                    |
| Future                                   | <input type="checkbox"/> For ≥ 5 years<br><input type="checkbox"/> between 1 and 5 years<br><input type="checkbox"/> no prospect                                                                                                                            |
| Quality of performers                    | <input type="checkbox"/> Trained, professionals<br><input type="checkbox"/> Trained, non-professionals – training by documentation, volunteers<br><input type="checkbox"/> Uncertain or not -specified                                                      |
| Quality of data                          | <input type="checkbox"/> Standard recording of raw data<br><input type="checkbox"/> Free recording of raw data<br><input type="checkbox"/> Anecdotic                                                                                                        |
| Analysis                                 | <input type="checkbox"/> Reported, verifiable methodology<br><input type="checkbox"/> Reported, unverifiable methodology<br><input type="checkbox"/> Unknown, unverifiable methodology                                                                      |
| Quality of analysis                      | <input type="checkbox"/> Scientifically based<br><input type="checkbox"/> Indicative only<br><input type="checkbox"/> Unknown                                                                                                                               |
| <b>REPORTING</b>                         |                                                                                                                                                                                                                                                             |
| Language                                 | Specify reporting language(s): Portuguese                                                                                                                                                                                                                   |
| Availability                             | <input type="checkbox"/> Scientific publication<br><input type="checkbox"/> Official report available on the internet or in other public forum<br><input type="checkbox"/> Official report available from network<br><input type="checkbox"/> Not available |
| Frequency                                | <input type="checkbox"/> ≥ 1 time/year – Yearly reports, frequent notifications<br><input type="checkbox"/> < 1 time/year                                                                                                                                   |
| Historical reference                     | <input type="checkbox"/> over ≥ 5 years<br><input type="checkbox"/> between 1 and 5 years<br><input type="checkbox"/> no historical analysis                                                                                                                |
| <b>COMMENT(S)</b>                        |                                                                                                                                                                                                                                                             |
| Alert system based on local indications. |                                                                                                                                                                                                                                                             |

## GSEN-09-0213.00.1 PT – Min Agric. GMO Register

| EuropaBio's coordinated approach to General Surveillance: Existing Networks |                                                                                                                                                                                                                                                                                                           |                                                                                                                                                                                                                                                                                                                                                                                                                                                                                                                   |                                                                                                                                                                                                                                                                                                         |
|-----------------------------------------------------------------------------|-----------------------------------------------------------------------------------------------------------------------------------------------------------------------------------------------------------------------------------------------------------------------------------------------------------|-------------------------------------------------------------------------------------------------------------------------------------------------------------------------------------------------------------------------------------------------------------------------------------------------------------------------------------------------------------------------------------------------------------------------------------------------------------------------------------------------------------------|---------------------------------------------------------------------------------------------------------------------------------------------------------------------------------------------------------------------------------------------------------------------------------------------------------|
| ORGANISATION                                                                |                                                                                                                                                                                                                                                                                                           |                                                                                                                                                                                                                                                                                                                                                                                                                                                                                                                   |                                                                                                                                                                                                                                                                                                         |
| EuropaBio reference                                                         | GS-EN-09-0213                                                                                                                                                                                                                                                                                             |                                                                                                                                                                                                                                                                                                                                                                                                                                                                                                                   |                                                                                                                                                                                                                                                                                                         |
| Official name of the Network                                                | <b>Ministério da Agricultura, do Desenvolvimento Rural e das Pescas;<br/>Direcção Geral de Agricultura e Desenvolvimento Rural</b>                                                                                                                                                                        |                                                                                                                                                                                                                                                                                                                                                                                                                                                                                                                   |                                                                                                                                                                                                                                                                                                         |
| Other names                                                                 | Portuguese Environmental Agency, GMO register, DGADR                                                                                                                                                                                                                                                      |                                                                                                                                                                                                                                                                                                                                                                                                                                                                                                                   |                                                                                                                                                                                                                                                                                                         |
| Type of organisation                                                        | Governmental<br>Activities related to GMOs started in 2005                                                                                                                                                                                                                                                |                                                                                                                                                                                                                                                                                                                                                                                                                                                                                                                   |                                                                                                                                                                                                                                                                                                         |
| Coordinates                                                                 | Email: <a href="mailto:dgadr[at]dgadr.pt">dgadr[at]dgadr.pt</a>                                                                                                                                                                                                                                           |                                                                                                                                                                                                                                                                                                                                                                                                                                                                                                                   |                                                                                                                                                                                                                                                                                                         |
| Website                                                                     | <a href="http://www.dgadr.pt/">www.dgadr.pt/</a>                                                                                                                                                                                                                                                          |                                                                                                                                                                                                                                                                                                                                                                                                                                                                                                                   |                                                                                                                                                                                                                                                                                                         |
| Funding                                                                     | Government                                                                                                                                                                                                                                                                                                |                                                                                                                                                                                                                                                                                                                                                                                                                                                                                                                   |                                                                                                                                                                                                                                                                                                         |
| Conflict of interest                                                        | -                                                                                                                                                                                                                                                                                                         |                                                                                                                                                                                                                                                                                                                                                                                                                                                                                                                   |                                                                                                                                                                                                                                                                                                         |
| Part of other network(s)                                                    |                                                                                                                                                                                                                                                                                                           |                                                                                                                                                                                                                                                                                                                                                                                                                                                                                                                   |                                                                                                                                                                                                                                                                                                         |
| Grouping other network(s)                                                   |                                                                                                                                                                                                                                                                                                           |                                                                                                                                                                                                                                                                                                                                                                                                                                                                                                                   |                                                                                                                                                                                                                                                                                                         |
| MONITORING SUBJECT                                                          |                                                                                                                                                                                                                                                                                                           |                                                                                                                                                                                                                                                                                                                                                                                                                                                                                                                   |                                                                                                                                                                                                                                                                                                         |
| Description                                                                 | GMO register (trials & commercial planting)                                                                                                                                                                                                                                                               |                                                                                                                                                                                                                                                                                                                                                                                                                                                                                                                   |                                                                                                                                                                                                                                                                                                         |
| Protection goal(s) and/or influencing factor(s)                             | <input type="checkbox"/> Protection goal                                                                                                                                                                                                                                                                  | <input checked="" type="checkbox"/> Influencing factor                                                                                                                                                                                                                                                                                                                                                                                                                                                            |                                                                                                                                                                                                                                                                                                         |
|                                                                             | <input type="checkbox"/> Biodiversity<br><input type="checkbox"/> Human Health<br><input type="checkbox"/> Animal Health<br><input type="checkbox"/> Plant Health<br><input type="checkbox"/> Soil function<br><input type="checkbox"/> Water quality<br><input type="checkbox"/> Sustainable Agriculture | <input type="checkbox"/> Agronomic practice<br><input type="checkbox"/> Plant protection<br><input checked="" type="checkbox"/> GMO cultivation<br><input type="checkbox"/> Environmental conditions                                                                                                                                                                                                                                                                                                              |                                                                                                                                                                                                                                                                                                         |
| Duplication of Farmer's questionnaire                                       | <input type="checkbox"/> No duplication<br><input checked="" type="checkbox"/> Partly duplication<br><input type="checkbox"/> Complete duplication                                                                                                                                                        |                                                                                                                                                                                                                                                                                                                                                                                                                                                                                                                   |                                                                                                                                                                                                                                                                                                         |
| SPECIFICITY                                                                 |                                                                                                                                                                                                                                                                                                           |                                                                                                                                                                                                                                                                                                                                                                                                                                                                                                                   |                                                                                                                                                                                                                                                                                                         |
| Geography                                                                   | <input type="checkbox"/> EU -wide                                                                                                                                                                                                                                                                         |                                                                                                                                                                                                                                                                                                                                                                                                                                                                                                                   |                                                                                                                                                                                                                                                                                                         |
|                                                                             | <input type="checkbox"/> Zone A – North                                                                                                                                                                                                                                                                   | <input type="checkbox"/> Zone B – Centre:                                                                                                                                                                                                                                                                                                                                                                                                                                                                         | <input checked="" type="checkbox"/> Zone C – South                                                                                                                                                                                                                                                      |
|                                                                             | <input type="checkbox"/> Denmark,<br><input type="checkbox"/> Estonia,<br><input type="checkbox"/> Latvia,<br><input type="checkbox"/> Lithuania,<br><input type="checkbox"/> Finland,<br><input type="checkbox"/> Sweden                                                                                 | <input type="checkbox"/> Belgium,<br><input type="checkbox"/> Czech Republic<br><input type="checkbox"/> Germany,<br><input type="checkbox"/> Ireland,<br><input type="checkbox"/> Luxembourg,<br><input type="checkbox"/> Hungary,<br><input type="checkbox"/> Netherlands,<br><input type="checkbox"/> Austria,<br><input type="checkbox"/> Poland,<br><input type="checkbox"/> Romania,<br><input type="checkbox"/> Slovenia,<br><input type="checkbox"/> Slovakia,<br><input type="checkbox"/> United Kingdom | <input type="checkbox"/> Bulgaria,<br><input type="checkbox"/> Greece,<br><input type="checkbox"/> Spain,<br><input type="checkbox"/> France,<br><input type="checkbox"/> Italy,<br><input type="checkbox"/> Cyprus,<br><input type="checkbox"/> Malta,<br><input checked="" type="checkbox"/> Portugal |
|                                                                             | <input type="checkbox"/> Regional (specify)<br><input type="checkbox"/> Local (specify)                                                                                                                                                                                                                   |                                                                                                                                                                                                                                                                                                                                                                                                                                                                                                                   |                                                                                                                                                                                                                                                                                                         |
| Factors                                                                     | <input checked="" type="checkbox"/> Multiple species/items (specify): GMO cultivation<br><input type="checkbox"/> Single species/item (specify)                                                                                                                                                           |                                                                                                                                                                                                                                                                                                                                                                                                                                                                                                                   |                                                                                                                                                                                                                                                                                                         |
| Crop                                                                        | <input type="checkbox"/> No specific crop(s)<br><input type="checkbox"/> Several crops (e.g. all cereals)<br><input checked="" type="checkbox"/> Single crop: maize                                                                                                                                       |                                                                                                                                                                                                                                                                                                                                                                                                                                                                                                                   |                                                                                                                                                                                                                                                                                                         |
| Trait /treatment                                                            | <input checked="" type="checkbox"/> No specific traits/treatments<br><input type="checkbox"/> Several traits/treatments<br><input type="checkbox"/> Single trait/treatment                                                                                                                                |                                                                                                                                                                                                                                                                                                                                                                                                                                                                                                                   |                                                                                                                                                                                                                                                                                                         |
| GMO                                                                         | <input type="checkbox"/> No GMO bias<br><input checked="" type="checkbox"/> GMO specific                                                                                                                                                                                                                  |                                                                                                                                                                                                                                                                                                                                                                                                                                                                                                                   |                                                                                                                                                                                                                                                                                                         |
| METHODOLOGY                                                                 |                                                                                                                                                                                                                                                                                                           |                                                                                                                                                                                                                                                                                                                                                                                                                                                                                                                   |                                                                                                                                                                                                                                                                                                         |
| Observations                                                                | <input checked="" type="checkbox"/> Reported, verifiable methodology<br><input type="checkbox"/> Reported, unverifiable methodology<br><input type="checkbox"/> Unknown, unverifiable methodology                                                                                                         |                                                                                                                                                                                                                                                                                                                                                                                                                                                                                                                   |                                                                                                                                                                                                                                                                                                         |
| Frequency                                                                   | <input type="checkbox"/> > 1 time/year                                                                                                                                                                                                                                                                    |                                                                                                                                                                                                                                                                                                                                                                                                                                                                                                                   |                                                                                                                                                                                                                                                                                                         |

|                                                                                                                                              |                                                                                                                                                                                                                                                                        |
|----------------------------------------------------------------------------------------------------------------------------------------------|------------------------------------------------------------------------------------------------------------------------------------------------------------------------------------------------------------------------------------------------------------------------|
|                                                                                                                                              | <input checked="" type="checkbox"/> 1 time/year<br><input type="checkbox"/> < 1 time/year                                                                                                                                                                              |
| Future                                                                                                                                       | <input checked="" type="checkbox"/> For ≥ 5 years<br><input type="checkbox"/> between 1 and 5 years<br><input type="checkbox"/> no prospect                                                                                                                            |
| Quality of performers                                                                                                                        | <input checked="" type="checkbox"/> Trained, professionals<br><input type="checkbox"/> Trained, non-professionals – training by documentation, volunteers<br><input type="checkbox"/> Uncertain or not -specified                                                      |
| Quality of data                                                                                                                              | <input checked="" type="checkbox"/> Standard recording of raw data<br><input type="checkbox"/> Free recording of raw data<br><input type="checkbox"/> Anecdotic                                                                                                        |
| Analysis                                                                                                                                     | <input type="checkbox"/> Reported, verifiable methodology<br><input checked="" type="checkbox"/> Reported, unverifiable methodology<br><input type="checkbox"/> Unknown, unverifiable methodology                                                                      |
| Quality of analysis                                                                                                                          | <input type="checkbox"/> Scientifically based<br><input type="checkbox"/> Indicative only<br><input checked="" type="checkbox"/> Unknown                                                                                                                               |
| <b>REPORTING</b>                                                                                                                             |                                                                                                                                                                                                                                                                        |
| Language                                                                                                                                     | Reporting language(s): Portuguese                                                                                                                                                                                                                                      |
| Availability                                                                                                                                 | <input type="checkbox"/> Scientific publication<br><input checked="" type="checkbox"/> Official report available on the internet or in other public forum<br><input type="checkbox"/> Official report available from network<br><input type="checkbox"/> Not available |
| Frequency                                                                                                                                    | <input checked="" type="checkbox"/> ≥ 1 time/year<br><input type="checkbox"/> < 1 time/year                                                                                                                                                                            |
| Historical reference                                                                                                                         | <input type="checkbox"/> over ≥ 5 years<br><input checked="" type="checkbox"/> between 1 and 5 years<br><input type="checkbox"/> no historical analysis                                                                                                                |
| <b>COMMENT(S)</b>                                                                                                                            |                                                                                                                                                                                                                                                                        |
| Recording notifications for cultivation; monitoring by inspectors; studies on coexistence. Yearly monitoring report. Yearly data on acreage. |                                                                                                                                                                                                                                                                        |



## GSEN-09-0216.00.1 PT – Water Institute

| EuropaBio's coordinated approach to General Surveillance: Existing Networks |                                                                                                                                                                                                                                                                                                                                                                                   |                                                                                                                                                                                                                                                                                                                                                                                                                                                                                                                   |                                                                                                                                                                                                                                                                                                         |
|-----------------------------------------------------------------------------|-----------------------------------------------------------------------------------------------------------------------------------------------------------------------------------------------------------------------------------------------------------------------------------------------------------------------------------------------------------------------------------|-------------------------------------------------------------------------------------------------------------------------------------------------------------------------------------------------------------------------------------------------------------------------------------------------------------------------------------------------------------------------------------------------------------------------------------------------------------------------------------------------------------------|---------------------------------------------------------------------------------------------------------------------------------------------------------------------------------------------------------------------------------------------------------------------------------------------------------|
| <b>ORGANISATION</b>                                                         |                                                                                                                                                                                                                                                                                                                                                                                   |                                                                                                                                                                                                                                                                                                                                                                                                                                                                                                                   |                                                                                                                                                                                                                                                                                                         |
| EuropaBio reference                                                         | GS-EN-09-0216                                                                                                                                                                                                                                                                                                                                                                     |                                                                                                                                                                                                                                                                                                                                                                                                                                                                                                                   |                                                                                                                                                                                                                                                                                                         |
| Official name of the Network                                                | <b>Instituto Nacional da Água<br/>National Water Institute</b>                                                                                                                                                                                                                                                                                                                    |                                                                                                                                                                                                                                                                                                                                                                                                                                                                                                                   |                                                                                                                                                                                                                                                                                                         |
| Other names                                                                 | INAG                                                                                                                                                                                                                                                                                                                                                                              |                                                                                                                                                                                                                                                                                                                                                                                                                                                                                                                   |                                                                                                                                                                                                                                                                                                         |
| Type of organisation                                                        | Governmental<br>Founded (unknown)                                                                                                                                                                                                                                                                                                                                                 |                                                                                                                                                                                                                                                                                                                                                                                                                                                                                                                   |                                                                                                                                                                                                                                                                                                         |
| Coordinates                                                                 | Av. Almirante Gago Coutinho, nº 30<br>1049-066 Lisboa<br><br>Fax: 21 847 35 71<br>Email: inforag[at]inag                                                                                                                                                                                                                                                                          |                                                                                                                                                                                                                                                                                                                                                                                                                                                                                                                   |                                                                                                                                                                                                                                                                                                         |
| Website                                                                     | <a href="http://portaldagua.inag.pt/PT/SectorAgua/Portugal/Pages/ADPNacionaisINAG.aspx">http://portaldagua.inag.pt/PT/SectorAgua/Portugal/Pages/ADPNacionaisINAG.aspx</a>                                                                                                                                                                                                         |                                                                                                                                                                                                                                                                                                                                                                                                                                                                                                                   |                                                                                                                                                                                                                                                                                                         |
| Funding                                                                     | public                                                                                                                                                                                                                                                                                                                                                                            |                                                                                                                                                                                                                                                                                                                                                                                                                                                                                                                   |                                                                                                                                                                                                                                                                                                         |
| Conflict of interest                                                        | -                                                                                                                                                                                                                                                                                                                                                                                 |                                                                                                                                                                                                                                                                                                                                                                                                                                                                                                                   |                                                                                                                                                                                                                                                                                                         |
| Part of other network(s)                                                    | -                                                                                                                                                                                                                                                                                                                                                                                 |                                                                                                                                                                                                                                                                                                                                                                                                                                                                                                                   |                                                                                                                                                                                                                                                                                                         |
| Grouping other network(s)                                                   |                                                                                                                                                                                                                                                                                                                                                                                   |                                                                                                                                                                                                                                                                                                                                                                                                                                                                                                                   |                                                                                                                                                                                                                                                                                                         |
| <b>MONITORING SUBJECT</b>                                                   |                                                                                                                                                                                                                                                                                                                                                                                   |                                                                                                                                                                                                                                                                                                                                                                                                                                                                                                                   |                                                                                                                                                                                                                                                                                                         |
| Description                                                                 | Information on water quality, weather (rainfall), drought monitoring, permits for water use etc.                                                                                                                                                                                                                                                                                  |                                                                                                                                                                                                                                                                                                                                                                                                                                                                                                                   |                                                                                                                                                                                                                                                                                                         |
| Protection goal(s) and/or influencing factor(s)                             | <input checked="" type="checkbox"/> Protection goal<br><input type="checkbox"/> Biodiversity: fish<br><input type="checkbox"/> Human Health<br><input type="checkbox"/> Animal Health<br><input type="checkbox"/> Plant Health<br><input type="checkbox"/> Soil function<br><input checked="" type="checkbox"/> Water quality<br><input type="checkbox"/> Sustainable Agriculture | <input type="checkbox"/> Influencing factor<br><input type="checkbox"/> Agronomic practice<br><input type="checkbox"/> Plant protection<br><input type="checkbox"/> GMO cultivation<br><input type="checkbox"/> Environmental conditions                                                                                                                                                                                                                                                                          |                                                                                                                                                                                                                                                                                                         |
| Duplication of Farmer's questionnaire                                       | <input checked="" type="checkbox"/> No duplication<br><input type="checkbox"/> Partly duplication<br><input type="checkbox"/> Complete duplication                                                                                                                                                                                                                                |                                                                                                                                                                                                                                                                                                                                                                                                                                                                                                                   |                                                                                                                                                                                                                                                                                                         |
| <b>SPECIFICITY</b>                                                          |                                                                                                                                                                                                                                                                                                                                                                                   |                                                                                                                                                                                                                                                                                                                                                                                                                                                                                                                   |                                                                                                                                                                                                                                                                                                         |
| Geography                                                                   | <input type="checkbox"/> EU -wide<br><input type="checkbox"/> Zone A – North<br><input type="checkbox"/> Zone B – Centre:<br><input type="checkbox"/> Zone C – South                                                                                                                                                                                                              |                                                                                                                                                                                                                                                                                                                                                                                                                                                                                                                   |                                                                                                                                                                                                                                                                                                         |
|                                                                             | <input type="checkbox"/> Denmark,<br><input type="checkbox"/> Estonia,<br><input type="checkbox"/> Latvia,<br><input type="checkbox"/> Lithuania,<br><input type="checkbox"/> Finland,<br><input type="checkbox"/> Sweden                                                                                                                                                         | <input type="checkbox"/> Belgium,<br><input type="checkbox"/> Czech Republic<br><input type="checkbox"/> Germany,<br><input type="checkbox"/> Ireland,<br><input type="checkbox"/> Luxembourg,<br><input type="checkbox"/> Hungary,<br><input type="checkbox"/> Netherlands,<br><input type="checkbox"/> Austria,<br><input type="checkbox"/> Poland,<br><input type="checkbox"/> Romania,<br><input type="checkbox"/> Slovenia,<br><input type="checkbox"/> Slovakia,<br><input type="checkbox"/> United Kingdom | <input type="checkbox"/> Bulgaria,<br><input type="checkbox"/> Greece,<br><input type="checkbox"/> Spain,<br><input type="checkbox"/> France,<br><input type="checkbox"/> Italy,<br><input type="checkbox"/> Cyprus,<br><input type="checkbox"/> Malta,<br><input checked="" type="checkbox"/> Portugal |
|                                                                             | <input type="checkbox"/> Regional (specify)<br><input type="checkbox"/> Local (specify)                                                                                                                                                                                                                                                                                           |                                                                                                                                                                                                                                                                                                                                                                                                                                                                                                                   |                                                                                                                                                                                                                                                                                                         |
| Factors                                                                     | <input checked="" type="checkbox"/> Multiple species/items (specify): water quality superficial, groundwater, climate, monitoring drought<br><input type="checkbox"/> Single species/item (specify)                                                                                                                                                                               |                                                                                                                                                                                                                                                                                                                                                                                                                                                                                                                   |                                                                                                                                                                                                                                                                                                         |
| Crop                                                                        | <input checked="" type="checkbox"/> No specific crop(s)<br><input type="checkbox"/> Several crops (e.g. all cereals)<br><input type="checkbox"/> Single crop                                                                                                                                                                                                                      |                                                                                                                                                                                                                                                                                                                                                                                                                                                                                                                   |                                                                                                                                                                                                                                                                                                         |
| Trait /treatment                                                            | <input checked="" type="checkbox"/> No specific traits/treatments<br><input type="checkbox"/> Several traits/treatments<br><input type="checkbox"/> Single trait/treatment                                                                                                                                                                                                        |                                                                                                                                                                                                                                                                                                                                                                                                                                                                                                                   |                                                                                                                                                                                                                                                                                                         |
| GMO                                                                         | <input checked="" type="checkbox"/> No GMO bias<br><input type="checkbox"/> GMO specific                                                                                                                                                                                                                                                                                          |                                                                                                                                                                                                                                                                                                                                                                                                                                                                                                                   |                                                                                                                                                                                                                                                                                                         |
| <b>METHODOLOGY</b>                                                          |                                                                                                                                                                                                                                                                                                                                                                                   |                                                                                                                                                                                                                                                                                                                                                                                                                                                                                                                   |                                                                                                                                                                                                                                                                                                         |

|                                                                                                                        |                                                                                                                                                                                                                                                                        |
|------------------------------------------------------------------------------------------------------------------------|------------------------------------------------------------------------------------------------------------------------------------------------------------------------------------------------------------------------------------------------------------------------|
| Observations                                                                                                           | <input type="checkbox"/> Reported, verifiable methodology<br><input type="checkbox"/> Reported, unverifiable methodology<br><input checked="" type="checkbox"/> Unknown, unverifiable methodology                                                                      |
| Frequency                                                                                                              | <input checked="" type="checkbox"/> > 1 time/year<br><input type="checkbox"/> 1 time/year<br><input type="checkbox"/> < 1 time/year                                                                                                                                    |
| Future                                                                                                                 | <input checked="" type="checkbox"/> For $\geq 5$ years<br><input type="checkbox"/> between 1 and 5 years<br><input type="checkbox"/> no prospect                                                                                                                       |
| Quality of performers                                                                                                  | <input checked="" type="checkbox"/> Trained, professionals<br><input type="checkbox"/> Trained, non-professionals –<br><input type="checkbox"/> Uncertain or not -specified                                                                                            |
| Quality of data                                                                                                        | <input checked="" type="checkbox"/> Standard recording of raw data<br><input type="checkbox"/> Free recording of raw data<br><input type="checkbox"/> Anecdotic                                                                                                        |
| Analysis                                                                                                               | <input type="checkbox"/> Reported, verifiable methodology<br><input type="checkbox"/> Reported, unverifiable methodology<br><input checked="" type="checkbox"/> Unknown, unverifiable methodology                                                                      |
| Quality of analysis                                                                                                    | <input type="checkbox"/> Scientifically based<br><input type="checkbox"/> Indicative only<br><input checked="" type="checkbox"/> Unknown                                                                                                                               |
| <b>REPORTING</b>                                                                                                       |                                                                                                                                                                                                                                                                        |
| Language                                                                                                               | Specify reporting language(s): Portuguese                                                                                                                                                                                                                              |
| Availability                                                                                                           | <input type="checkbox"/> Scientific publication<br><input checked="" type="checkbox"/> Official report available on the internet or in other public forum<br><input type="checkbox"/> Official report available from network<br><input type="checkbox"/> Not available |
| Frequency                                                                                                              | <input checked="" type="checkbox"/> $\geq 1$ time/year –<br><input type="checkbox"/> < 1 time/year –                                                                                                                                                                   |
| Historical reference                                                                                                   | <input checked="" type="checkbox"/> over $\geq 5$ years<br><input type="checkbox"/> between 1 and 5 years<br><input type="checkbox"/> no historical analysis                                                                                                           |
| <b>COMMENT(S)</b>                                                                                                      |                                                                                                                                                                                                                                                                        |
| Collection of documents and reports on water quality in a broad sense. Monthly newsletters on the hydrological status. |                                                                                                                                                                                                                                                                        |

## GSEN-09-0220.00.1 PT – EDIA

| EuropaBio's coordinated approach to General Surveillance: Existing Networks |                                                                                                                                                                                                                                                                                                                                                                                       |                                                                                                                                                                                                                                                                                                                                                                                                                                                                                                                   |                                                                                                                                                                                                                                                                                                         |
|-----------------------------------------------------------------------------|---------------------------------------------------------------------------------------------------------------------------------------------------------------------------------------------------------------------------------------------------------------------------------------------------------------------------------------------------------------------------------------|-------------------------------------------------------------------------------------------------------------------------------------------------------------------------------------------------------------------------------------------------------------------------------------------------------------------------------------------------------------------------------------------------------------------------------------------------------------------------------------------------------------------|---------------------------------------------------------------------------------------------------------------------------------------------------------------------------------------------------------------------------------------------------------------------------------------------------------|
| ORGANISATION                                                                |                                                                                                                                                                                                                                                                                                                                                                                       |                                                                                                                                                                                                                                                                                                                                                                                                                                                                                                                   |                                                                                                                                                                                                                                                                                                         |
| EuropaBio reference                                                         | GS-EN-09-0220                                                                                                                                                                                                                                                                                                                                                                         |                                                                                                                                                                                                                                                                                                                                                                                                                                                                                                                   |                                                                                                                                                                                                                                                                                                         |
| Official name of the Network                                                | <b>Empresa de Desenvolvimento e Infra-estruturas do Alqueva</b>                                                                                                                                                                                                                                                                                                                       |                                                                                                                                                                                                                                                                                                                                                                                                                                                                                                                   |                                                                                                                                                                                                                                                                                                         |
| Other names                                                                 | Public Enterprise for the development of Alqueva; EDIA                                                                                                                                                                                                                                                                                                                                |                                                                                                                                                                                                                                                                                                                                                                                                                                                                                                                   |                                                                                                                                                                                                                                                                                                         |
| Type of organisation                                                        | Governmental<br>Founded 1995                                                                                                                                                                                                                                                                                                                                                          |                                                                                                                                                                                                                                                                                                                                                                                                                                                                                                                   |                                                                                                                                                                                                                                                                                                         |
| Coordinates                                                                 | Headquarters:<br>Rua Zeca Afonso, 2<br>7800 - 522 Beja<br><br>Fax: 284 31 51 01<br>Email: site[at]edia.pt                                                                                                                                                                                                                                                                             |                                                                                                                                                                                                                                                                                                                                                                                                                                                                                                                   |                                                                                                                                                                                                                                                                                                         |
| Website                                                                     | <a href="http://www.edia.pt">www.edia.pt</a>                                                                                                                                                                                                                                                                                                                                          |                                                                                                                                                                                                                                                                                                                                                                                                                                                                                                                   |                                                                                                                                                                                                                                                                                                         |
| Funding                                                                     | public                                                                                                                                                                                                                                                                                                                                                                                |                                                                                                                                                                                                                                                                                                                                                                                                                                                                                                                   |                                                                                                                                                                                                                                                                                                         |
| Conflict of interest                                                        | -                                                                                                                                                                                                                                                                                                                                                                                     |                                                                                                                                                                                                                                                                                                                                                                                                                                                                                                                   |                                                                                                                                                                                                                                                                                                         |
| Part of other network(s)                                                    | -                                                                                                                                                                                                                                                                                                                                                                                     |                                                                                                                                                                                                                                                                                                                                                                                                                                                                                                                   |                                                                                                                                                                                                                                                                                                         |
| Grouping other network(s)                                                   |                                                                                                                                                                                                                                                                                                                                                                                       |                                                                                                                                                                                                                                                                                                                                                                                                                                                                                                                   |                                                                                                                                                                                                                                                                                                         |
| MONITORING SUBJECT                                                          |                                                                                                                                                                                                                                                                                                                                                                                       |                                                                                                                                                                                                                                                                                                                                                                                                                                                                                                                   |                                                                                                                                                                                                                                                                                                         |
| Description                                                                 | Manages the Alqueva dam on the Guadiana river in Alentejo.<br>Monitoring water quality and quantity that is used for irrigation (115.000ha). Weather stations.<br>Monitoring fauna and flora around the dam before and after building (finished).                                                                                                                                     |                                                                                                                                                                                                                                                                                                                                                                                                                                                                                                                   |                                                                                                                                                                                                                                                                                                         |
| Protection goal(s) and/or influencing factor(s)                             | <input checked="" type="checkbox"/> Protection goal<br><br><input type="checkbox"/> Biodiversity: fish<br><input type="checkbox"/> Human Health<br><input type="checkbox"/> Animal Health<br><input type="checkbox"/> Plant Health<br><input type="checkbox"/> Soil function<br><input checked="" type="checkbox"/> Water quality<br><input type="checkbox"/> Sustainable Agriculture | <input type="checkbox"/> Influencing factor<br><br><input type="checkbox"/> Agronomic practice<br><input type="checkbox"/> Plant protection<br><input type="checkbox"/> GMO cultivation<br><input type="checkbox"/> Environmental conditions                                                                                                                                                                                                                                                                      |                                                                                                                                                                                                                                                                                                         |
| Duplication of Farmer's questionnaire                                       | <input checked="" type="checkbox"/> No duplication<br><input type="checkbox"/> Partly duplication<br><input type="checkbox"/> Complete duplication                                                                                                                                                                                                                                    |                                                                                                                                                                                                                                                                                                                                                                                                                                                                                                                   |                                                                                                                                                                                                                                                                                                         |
| SPECIFICITY                                                                 |                                                                                                                                                                                                                                                                                                                                                                                       |                                                                                                                                                                                                                                                                                                                                                                                                                                                                                                                   |                                                                                                                                                                                                                                                                                                         |
| Geography                                                                   | <input type="checkbox"/> EU -wide<br><br><input type="checkbox"/> Zone A – North<br><input type="checkbox"/> Zone B – Centre:<br><input type="checkbox"/> Zone C – South                                                                                                                                                                                                              |                                                                                                                                                                                                                                                                                                                                                                                                                                                                                                                   |                                                                                                                                                                                                                                                                                                         |
|                                                                             | <input type="checkbox"/> Denmark,<br><input type="checkbox"/> Estonia,<br><input type="checkbox"/> Latvia,<br><input type="checkbox"/> Lithuania,<br><input type="checkbox"/> Finland,<br><input type="checkbox"/> Sweden                                                                                                                                                             | <input type="checkbox"/> Belgium,<br><input type="checkbox"/> Czech Republic<br><input type="checkbox"/> Germany,<br><input type="checkbox"/> Ireland,<br><input type="checkbox"/> Luxembourg,<br><input type="checkbox"/> Hungary,<br><input type="checkbox"/> Netherlands,<br><input type="checkbox"/> Austria,<br><input type="checkbox"/> Poland,<br><input type="checkbox"/> Romania,<br><input type="checkbox"/> Slovenia,<br><input type="checkbox"/> Slovakia,<br><input type="checkbox"/> United Kingdom | <input type="checkbox"/> Bulgaria,<br><input type="checkbox"/> Greece,<br><input type="checkbox"/> Spain,<br><input type="checkbox"/> France,<br><input type="checkbox"/> Italy,<br><input type="checkbox"/> Cyprus,<br><input type="checkbox"/> Malta,<br><input checked="" type="checkbox"/> Portugal |
|                                                                             | <input type="checkbox"/> Regional (specify)<br><input checked="" type="checkbox"/> Local (specify): Alqueva dam region in Alentejo                                                                                                                                                                                                                                                    |                                                                                                                                                                                                                                                                                                                                                                                                                                                                                                                   |                                                                                                                                                                                                                                                                                                         |
| Factors                                                                     | <input checked="" type="checkbox"/> Multiple species/items (specify): water quality and quantity<br><input type="checkbox"/> Single species/item (specify)                                                                                                                                                                                                                            |                                                                                                                                                                                                                                                                                                                                                                                                                                                                                                                   |                                                                                                                                                                                                                                                                                                         |
| Crop                                                                        | <input checked="" type="checkbox"/> No specific crop(s)<br><input type="checkbox"/> Several crops (e.g. all cereals)<br><input type="checkbox"/> Single crop                                                                                                                                                                                                                          |                                                                                                                                                                                                                                                                                                                                                                                                                                                                                                                   |                                                                                                                                                                                                                                                                                                         |
| Trait /treatment                                                            | <input checked="" type="checkbox"/> No specific traits/treatments<br><input type="checkbox"/> Several traits/treatments<br><input type="checkbox"/> Single trait/treatment                                                                                                                                                                                                            |                                                                                                                                                                                                                                                                                                                                                                                                                                                                                                                   |                                                                                                                                                                                                                                                                                                         |
| GMO                                                                         | <input checked="" type="checkbox"/> No GMO bias<br><input type="checkbox"/> GMO specific                                                                                                                                                                                                                                                                                              |                                                                                                                                                                                                                                                                                                                                                                                                                                                                                                                   |                                                                                                                                                                                                                                                                                                         |

| <b>METHODOLOGY</b>                                                   |                                                                                                                                                                                                                                                                        |
|----------------------------------------------------------------------|------------------------------------------------------------------------------------------------------------------------------------------------------------------------------------------------------------------------------------------------------------------------|
| Observations                                                         | <input type="checkbox"/> Reported, verifiable methodology<br><input type="checkbox"/> Reported, unverifiable methodology<br><input checked="" type="checkbox"/> Unknown, unverifiable methodology                                                                      |
| Frequency                                                            | <input checked="" type="checkbox"/> > 1 time/year<br><input type="checkbox"/> 1 time/year<br><input type="checkbox"/> < 1 time/year                                                                                                                                    |
| Future                                                               | <input checked="" type="checkbox"/> For ≥ 5 years<br><input type="checkbox"/> between 1 and 5 years<br><input type="checkbox"/> no prospect                                                                                                                            |
| Quality of performers                                                | <input checked="" type="checkbox"/> Trained, professionals<br><input type="checkbox"/> Trained, non-professionals –<br><input type="checkbox"/> Uncertain or not -specified                                                                                            |
| Quality of data                                                      | <input checked="" type="checkbox"/> Standard recording of raw data<br><input type="checkbox"/> Free recording of raw data<br><input type="checkbox"/> Anecdotic                                                                                                        |
| Analysis                                                             | <input type="checkbox"/> Reported, verifiable methodology<br><input type="checkbox"/> Reported, unverifiable methodology<br><input checked="" type="checkbox"/> Unknown, unverifiable methodology                                                                      |
| Quality of analysis                                                  | <input type="checkbox"/> Scientifically based<br><input type="checkbox"/> Indicative only<br><input checked="" type="checkbox"/> Unknown                                                                                                                               |
| <b>REPORTING</b>                                                     |                                                                                                                                                                                                                                                                        |
| Language                                                             | Specify reporting language(s): Portuguese                                                                                                                                                                                                                              |
| Availability                                                         | <input type="checkbox"/> Scientific publication<br><input checked="" type="checkbox"/> Official report available on the internet or in other public forum<br><input type="checkbox"/> Official report available from network<br><input type="checkbox"/> Not available |
| Frequency                                                            | <input checked="" type="checkbox"/> ≥ 1 time/year –<br><input type="checkbox"/> < 1 time/year –                                                                                                                                                                        |
| Historical reference                                                 | <input type="checkbox"/> over ≥ 5 years<br><input type="checkbox"/> between 1 and 5 years<br><input type="checkbox"/> no historical analysis                                                                                                                           |
| <b>COMMENT(S)</b>                                                    |                                                                                                                                                                                                                                                                        |
| Weekly bulletins on water quality. Only actual bulletins accessible. |                                                                                                                                                                                                                                                                        |

## GSEN-09-0221.00.1 PT – GPP

| EuropaBio's coordinated approach to General Surveillance: Existing Networks |                                                                                                                                                                                                                                                                                                                                                                 |                                                                                                                                                                                                                                                                                                                                                                                                                                                                                                                   |                                                                                                                                                                                                                                                                                                         |
|-----------------------------------------------------------------------------|-----------------------------------------------------------------------------------------------------------------------------------------------------------------------------------------------------------------------------------------------------------------------------------------------------------------------------------------------------------------|-------------------------------------------------------------------------------------------------------------------------------------------------------------------------------------------------------------------------------------------------------------------------------------------------------------------------------------------------------------------------------------------------------------------------------------------------------------------------------------------------------------------|---------------------------------------------------------------------------------------------------------------------------------------------------------------------------------------------------------------------------------------------------------------------------------------------------------|
| <b>ORGANISATION</b>                                                         |                                                                                                                                                                                                                                                                                                                                                                 |                                                                                                                                                                                                                                                                                                                                                                                                                                                                                                                   |                                                                                                                                                                                                                                                                                                         |
| EuropaBio reference                                                         | GS-EN-09-0220                                                                                                                                                                                                                                                                                                                                                   |                                                                                                                                                                                                                                                                                                                                                                                                                                                                                                                   |                                                                                                                                                                                                                                                                                                         |
| Official name of the Network                                                | <b>Gabinete de Planeamento e Políticas<br/>Planning and Agro-food Policies Office</b>                                                                                                                                                                                                                                                                           |                                                                                                                                                                                                                                                                                                                                                                                                                                                                                                                   |                                                                                                                                                                                                                                                                                                         |
| Other names                                                                 | Ministry of Agriculture, Sea, Environment and Spatial Planning: Office of Planning and Policies; GPP                                                                                                                                                                                                                                                            |                                                                                                                                                                                                                                                                                                                                                                                                                                                                                                                   |                                                                                                                                                                                                                                                                                                         |
| Type of organisation                                                        | Governmental<br>Founded (unknown)                                                                                                                                                                                                                                                                                                                               |                                                                                                                                                                                                                                                                                                                                                                                                                                                                                                                   |                                                                                                                                                                                                                                                                                                         |
| Coordinates                                                                 | Rua Padre António Vieira, 1<br>1099-073 LISBON<br><br>Fax: (+351) 213 876 635<br>Email: gpp[at]gpp.pt                                                                                                                                                                                                                                                           |                                                                                                                                                                                                                                                                                                                                                                                                                                                                                                                   |                                                                                                                                                                                                                                                                                                         |
| Website                                                                     | <a href="http://www.gpp.pt">www.gpp.pt</a>                                                                                                                                                                                                                                                                                                                      |                                                                                                                                                                                                                                                                                                                                                                                                                                                                                                                   |                                                                                                                                                                                                                                                                                                         |
| Funding                                                                     | public                                                                                                                                                                                                                                                                                                                                                          |                                                                                                                                                                                                                                                                                                                                                                                                                                                                                                                   |                                                                                                                                                                                                                                                                                                         |
| Conflict of interest                                                        | -                                                                                                                                                                                                                                                                                                                                                               |                                                                                                                                                                                                                                                                                                                                                                                                                                                                                                                   |                                                                                                                                                                                                                                                                                                         |
| Part of other network(s)                                                    | -                                                                                                                                                                                                                                                                                                                                                               |                                                                                                                                                                                                                                                                                                                                                                                                                                                                                                                   |                                                                                                                                                                                                                                                                                                         |
| Grouping other network(s)                                                   |                                                                                                                                                                                                                                                                                                                                                                 |                                                                                                                                                                                                                                                                                                                                                                                                                                                                                                                   |                                                                                                                                                                                                                                                                                                         |
| <b>MONITORING SUBJECT</b>                                                   |                                                                                                                                                                                                                                                                                                                                                                 |                                                                                                                                                                                                                                                                                                                                                                                                                                                                                                                   |                                                                                                                                                                                                                                                                                                         |
| Description                                                                 | The office support the definition of strategic guidelines, priorities and objectives for the policies of the Portuguese Ministry of Agriculture and Sea                                                                                                                                                                                                         |                                                                                                                                                                                                                                                                                                                                                                                                                                                                                                                   |                                                                                                                                                                                                                                                                                                         |
| Protection goal(s) and/or influencing factor(s)                             | <input type="checkbox"/> Protection goal<br><br><input type="checkbox"/> Biodiversity: fish<br><input type="checkbox"/> Human Health<br><input type="checkbox"/> Animal Health<br><input type="checkbox"/> Plant Health<br><input type="checkbox"/> Soil function<br><input type="checkbox"/> Water quality<br><input type="checkbox"/> Sustainable Agriculture | <input type="checkbox"/> Influencing factor<br><br><input checked="" type="checkbox"/> Agronomic practice<br><input type="checkbox"/> Plant protection<br><input type="checkbox"/> GMO cultivation<br><input type="checkbox"/> Environmental conditions                                                                                                                                                                                                                                                           |                                                                                                                                                                                                                                                                                                         |
| Duplication of Farmer's questionnaire                                       | <input checked="" type="checkbox"/> No duplication<br><input type="checkbox"/> Partly duplication<br><input type="checkbox"/> Complete duplication                                                                                                                                                                                                              |                                                                                                                                                                                                                                                                                                                                                                                                                                                                                                                   |                                                                                                                                                                                                                                                                                                         |
| <b>SPECIFICITY</b>                                                          |                                                                                                                                                                                                                                                                                                                                                                 |                                                                                                                                                                                                                                                                                                                                                                                                                                                                                                                   |                                                                                                                                                                                                                                                                                                         |
| Geography                                                                   | <input type="checkbox"/> EU -wide<br><br><input type="checkbox"/> Zone A – North<br><input type="checkbox"/> Zone B – Centre:<br><input type="checkbox"/> Zone C – South                                                                                                                                                                                        |                                                                                                                                                                                                                                                                                                                                                                                                                                                                                                                   |                                                                                                                                                                                                                                                                                                         |
|                                                                             | <input type="checkbox"/> Denmark,<br><input type="checkbox"/> Estonia,<br><input type="checkbox"/> Latvia,<br><input type="checkbox"/> Lithuania,<br><input type="checkbox"/> Finland,<br><input type="checkbox"/> Sweden                                                                                                                                       | <input type="checkbox"/> Belgium,<br><input type="checkbox"/> Czech Republic<br><input type="checkbox"/> Germany,<br><input type="checkbox"/> Ireland,<br><input type="checkbox"/> Luxembourg,<br><input type="checkbox"/> Hungary,<br><input type="checkbox"/> Netherlands,<br><input type="checkbox"/> Austria,<br><input type="checkbox"/> Poland,<br><input type="checkbox"/> Romania,<br><input type="checkbox"/> Slovenia,<br><input type="checkbox"/> Slovakia,<br><input type="checkbox"/> United Kingdom | <input type="checkbox"/> Bulgaria,<br><input type="checkbox"/> Greece,<br><input type="checkbox"/> Spain,<br><input type="checkbox"/> France,<br><input type="checkbox"/> Italy,<br><input type="checkbox"/> Cyprus,<br><input type="checkbox"/> Malta,<br><input checked="" type="checkbox"/> Portugal |
|                                                                             | <input type="checkbox"/> Regional (specify)<br><input type="checkbox"/> Local (specify)                                                                                                                                                                                                                                                                         |                                                                                                                                                                                                                                                                                                                                                                                                                                                                                                                   |                                                                                                                                                                                                                                                                                                         |
| Factors                                                                     | <input checked="" type="checkbox"/> Multiple species/items (specify): land use, crop production<br><input type="checkbox"/> Single species/item (specify)                                                                                                                                                                                                       |                                                                                                                                                                                                                                                                                                                                                                                                                                                                                                                   |                                                                                                                                                                                                                                                                                                         |
| Crop                                                                        | <input checked="" type="checkbox"/> No specific crop(s)<br><input type="checkbox"/> Several crops (e.g. all cereals)<br><input type="checkbox"/> Single crop                                                                                                                                                                                                    |                                                                                                                                                                                                                                                                                                                                                                                                                                                                                                                   |                                                                                                                                                                                                                                                                                                         |
| Trait /treatment                                                            | <input checked="" type="checkbox"/> No specific traits/treatments<br><input type="checkbox"/> Several traits/treatments<br><input type="checkbox"/> Single trait/treatment                                                                                                                                                                                      |                                                                                                                                                                                                                                                                                                                                                                                                                                                                                                                   |                                                                                                                                                                                                                                                                                                         |
| GMO                                                                         | <input checked="" type="checkbox"/> No GMO bias<br><input type="checkbox"/> GMO specific                                                                                                                                                                                                                                                                        |                                                                                                                                                                                                                                                                                                                                                                                                                                                                                                                   |                                                                                                                                                                                                                                                                                                         |

| <b>METHODOLOGY</b>                                                                                                                                                                                    |                                                                                                                                                                                                                                                                        |
|-------------------------------------------------------------------------------------------------------------------------------------------------------------------------------------------------------|------------------------------------------------------------------------------------------------------------------------------------------------------------------------------------------------------------------------------------------------------------------------|
| Observations                                                                                                                                                                                          | <input type="checkbox"/> Reported, verifiable methodology<br><input type="checkbox"/> Reported, unverifiable methodology<br><input checked="" type="checkbox"/> Unknown, unverifiable methodology                                                                      |
| Frequency                                                                                                                                                                                             | <input type="checkbox"/> > 1 time/year<br><input checked="" type="checkbox"/> 1 time/year<br><input type="checkbox"/> < 1 time/year                                                                                                                                    |
| Future                                                                                                                                                                                                | <input checked="" type="checkbox"/> For $\geq 5$ years<br><input type="checkbox"/> between 1 and 5 years<br><input type="checkbox"/> no prospect                                                                                                                       |
| Quality of performers                                                                                                                                                                                 | <input checked="" type="checkbox"/> Trained, professionals<br><input type="checkbox"/> Trained, non-professionals –<br><input type="checkbox"/> Uncertain or not -specified                                                                                            |
| Quality of data                                                                                                                                                                                       | <input checked="" type="checkbox"/> Standard recording of raw data<br><input type="checkbox"/> Free recording of raw data<br><input type="checkbox"/> Anecdotic                                                                                                        |
| Analysis                                                                                                                                                                                              | <input type="checkbox"/> Reported, verifiable methodology<br><input type="checkbox"/> Reported, unverifiable methodology<br><input checked="" type="checkbox"/> Unknown, unverifiable methodology                                                                      |
| Quality of analysis                                                                                                                                                                                   | <input type="checkbox"/> Scientifically based<br><input type="checkbox"/> Indicative only<br><input checked="" type="checkbox"/> Unknown                                                                                                                               |
| <b>REPORTING</b>                                                                                                                                                                                      |                                                                                                                                                                                                                                                                        |
| Language                                                                                                                                                                                              | Specify reporting language(s): Portuguese/English                                                                                                                                                                                                                      |
| Availability                                                                                                                                                                                          | <input type="checkbox"/> Scientific publication<br><input checked="" type="checkbox"/> Official report available on the internet or in other public forum<br><input type="checkbox"/> Official report available from network<br><input type="checkbox"/> Not available |
| Frequency                                                                                                                                                                                             | <input checked="" type="checkbox"/> $\geq 1$ time/year –<br><input type="checkbox"/> < 1 time/year –                                                                                                                                                                   |
| Historical reference                                                                                                                                                                                  | <input checked="" type="checkbox"/> over $\geq 5$ years<br><input type="checkbox"/> between 1 and 5 years<br><input type="checkbox"/> no historical analysis                                                                                                           |
| <b>COMMENT(S)</b>                                                                                                                                                                                     |                                                                                                                                                                                                                                                                        |
| Yearly report on 'Agriculture, Forestry and Fishery Indicators': Information/statistics on land use, population, products, trade and climate. 'Crop production Yearbook' on crop production and trade |                                                                                                                                                                                                                                                                        |

## GSEN-09-0222.00.1 ES-PT – Iberian Mirmecology Association

| EuropaBio's coordinated approach to General Surveillance: Existing Networks |                                                                                                                                                                                                                                                                                                                               |                                                                                                                                                                                                                                                                                                                                                                                                                                                                                                                   |                                                                                                                                                                                                                                                                                                                    |
|-----------------------------------------------------------------------------|-------------------------------------------------------------------------------------------------------------------------------------------------------------------------------------------------------------------------------------------------------------------------------------------------------------------------------|-------------------------------------------------------------------------------------------------------------------------------------------------------------------------------------------------------------------------------------------------------------------------------------------------------------------------------------------------------------------------------------------------------------------------------------------------------------------------------------------------------------------|--------------------------------------------------------------------------------------------------------------------------------------------------------------------------------------------------------------------------------------------------------------------------------------------------------------------|
| <b>ORGANISATION</b>                                                         |                                                                                                                                                                                                                                                                                                                               |                                                                                                                                                                                                                                                                                                                                                                                                                                                                                                                   |                                                                                                                                                                                                                                                                                                                    |
| EuropaBio reference                                                         | GS-EN-09-0222                                                                                                                                                                                                                                                                                                                 |                                                                                                                                                                                                                                                                                                                                                                                                                                                                                                                   |                                                                                                                                                                                                                                                                                                                    |
| Official name of the Network                                                | <b>Asociación Ibérica de Mirmecología</b>                                                                                                                                                                                                                                                                                     |                                                                                                                                                                                                                                                                                                                                                                                                                                                                                                                   |                                                                                                                                                                                                                                                                                                                    |
| Other names                                                                 | Iberian Mirmecology Association; AIM                                                                                                                                                                                                                                                                                          |                                                                                                                                                                                                                                                                                                                                                                                                                                                                                                                   |                                                                                                                                                                                                                                                                                                                    |
| Type of organisation                                                        | Nature conservation<br>Founded 2006                                                                                                                                                                                                                                                                                           |                                                                                                                                                                                                                                                                                                                                                                                                                                                                                                                   |                                                                                                                                                                                                                                                                                                                    |
| Coordinates                                                                 | Asociación Ibérica de Mirmecología<br>Zoobotánico Jerez<br>Taxdirt s/n<br>11404 Jerez de la Frontera (Cádiz)                                                                                                                                                                                                                  |                                                                                                                                                                                                                                                                                                                                                                                                                                                                                                                   |                                                                                                                                                                                                                                                                                                                    |
| Website                                                                     | <a href="http://www.mirmiberica.org">www.mirmiberica.org</a>                                                                                                                                                                                                                                                                  |                                                                                                                                                                                                                                                                                                                                                                                                                                                                                                                   |                                                                                                                                                                                                                                                                                                                    |
| Funding                                                                     | Member fees, donations                                                                                                                                                                                                                                                                                                        |                                                                                                                                                                                                                                                                                                                                                                                                                                                                                                                   |                                                                                                                                                                                                                                                                                                                    |
| Conflict of interest                                                        | -                                                                                                                                                                                                                                                                                                                             |                                                                                                                                                                                                                                                                                                                                                                                                                                                                                                                   |                                                                                                                                                                                                                                                                                                                    |
| Part of other network(s)                                                    | Associated to the Institució Catalana d'Història Natural (ICHN)                                                                                                                                                                                                                                                               |                                                                                                                                                                                                                                                                                                                                                                                                                                                                                                                   |                                                                                                                                                                                                                                                                                                                    |
| Grouping other network(s)                                                   |                                                                                                                                                                                                                                                                                                                               |                                                                                                                                                                                                                                                                                                                                                                                                                                                                                                                   |                                                                                                                                                                                                                                                                                                                    |
| <b>MONITORING SUBJECT</b>                                                   |                                                                                                                                                                                                                                                                                                                               |                                                                                                                                                                                                                                                                                                                                                                                                                                                                                                                   |                                                                                                                                                                                                                                                                                                                    |
| Description                                                                 | Disseminating and expanding scientific knowledge about the insect family Formicidae.                                                                                                                                                                                                                                          |                                                                                                                                                                                                                                                                                                                                                                                                                                                                                                                   |                                                                                                                                                                                                                                                                                                                    |
| Protection goal(s) and/or influencing factor(s)                             | <input checked="" type="checkbox"/> Protection goal                                                                                                                                                                                                                                                                           | <input type="checkbox"/> Influencing factor                                                                                                                                                                                                                                                                                                                                                                                                                                                                       |                                                                                                                                                                                                                                                                                                                    |
|                                                                             | <input checked="" type="checkbox"/> Biodiversity: insects<br><input type="checkbox"/> Human Health<br><input type="checkbox"/> Animal Health<br><input type="checkbox"/> Plant Health<br><input type="checkbox"/> Soil function<br><input type="checkbox"/> Water quality<br><input type="checkbox"/> Sustainable Agriculture | <input type="checkbox"/> Agronomic practice<br><input type="checkbox"/> Plant protection<br><input type="checkbox"/> GMO cultivation<br><input type="checkbox"/> Environmental conditions                                                                                                                                                                                                                                                                                                                         |                                                                                                                                                                                                                                                                                                                    |
| Duplication of Farmer's questionnaire                                       | <input checked="" type="checkbox"/> No duplication<br><input type="checkbox"/> Partly duplication<br><input type="checkbox"/> Complete duplication                                                                                                                                                                            |                                                                                                                                                                                                                                                                                                                                                                                                                                                                                                                   |                                                                                                                                                                                                                                                                                                                    |
| <b>SPECIFICITY</b>                                                          |                                                                                                                                                                                                                                                                                                                               |                                                                                                                                                                                                                                                                                                                                                                                                                                                                                                                   |                                                                                                                                                                                                                                                                                                                    |
| Geography                                                                   | <input type="checkbox"/> EU -wide                                                                                                                                                                                                                                                                                             |                                                                                                                                                                                                                                                                                                                                                                                                                                                                                                                   |                                                                                                                                                                                                                                                                                                                    |
|                                                                             | <input type="checkbox"/> Zone A – North                                                                                                                                                                                                                                                                                       | <input type="checkbox"/> Zone B – Centre:                                                                                                                                                                                                                                                                                                                                                                                                                                                                         | <input checked="" type="checkbox"/> Zone C – South                                                                                                                                                                                                                                                                 |
|                                                                             | <input type="checkbox"/> Denmark,<br><input type="checkbox"/> Estonia,<br><input type="checkbox"/> Latvia,<br><input type="checkbox"/> Lithuania,<br><input type="checkbox"/> Finland,<br><input type="checkbox"/> Sweden                                                                                                     | <input type="checkbox"/> Belgium,<br><input type="checkbox"/> Czech Republic<br><input type="checkbox"/> Germany,<br><input type="checkbox"/> Ireland,<br><input type="checkbox"/> Luxembourg,<br><input type="checkbox"/> Hungary,<br><input type="checkbox"/> Netherlands,<br><input type="checkbox"/> Austria,<br><input type="checkbox"/> Poland,<br><input type="checkbox"/> Romania,<br><input type="checkbox"/> Slovenia,<br><input type="checkbox"/> Slovakia,<br><input type="checkbox"/> United Kingdom | <input type="checkbox"/> Bulgaria,<br><input type="checkbox"/> Greece,<br><input checked="" type="checkbox"/> Spain,<br><input type="checkbox"/> France,<br><input type="checkbox"/> Italy,<br><input type="checkbox"/> Cyprus,<br><input type="checkbox"/> Malta,<br><input checked="" type="checkbox"/> Portugal |
|                                                                             | <input type="checkbox"/> Regional (specify)<br><input type="checkbox"/> Local (specify)                                                                                                                                                                                                                                       |                                                                                                                                                                                                                                                                                                                                                                                                                                                                                                                   |                                                                                                                                                                                                                                                                                                                    |
| Factors                                                                     | <input checked="" type="checkbox"/> Multiple species/items (specify): ants<br><input type="checkbox"/> Single species/item (specify)                                                                                                                                                                                          |                                                                                                                                                                                                                                                                                                                                                                                                                                                                                                                   |                                                                                                                                                                                                                                                                                                                    |
| Crop                                                                        | <input checked="" type="checkbox"/> No specific crop(s)<br><input type="checkbox"/> Several crops (e.g. all cereals):<br><input type="checkbox"/> Single crop                                                                                                                                                                 |                                                                                                                                                                                                                                                                                                                                                                                                                                                                                                                   |                                                                                                                                                                                                                                                                                                                    |
| Trait /treatment                                                            | <input checked="" type="checkbox"/> No specific traits/treatments<br><input type="checkbox"/> Several traits/treatments:<br><input type="checkbox"/> Single trait/treatment                                                                                                                                                   |                                                                                                                                                                                                                                                                                                                                                                                                                                                                                                                   |                                                                                                                                                                                                                                                                                                                    |
| GMO                                                                         | <input checked="" type="checkbox"/> No GMO bias<br><input type="checkbox"/> GMO specific                                                                                                                                                                                                                                      |                                                                                                                                                                                                                                                                                                                                                                                                                                                                                                                   |                                                                                                                                                                                                                                                                                                                    |
| <b>METHODOLOGY</b>                                                          |                                                                                                                                                                                                                                                                                                                               |                                                                                                                                                                                                                                                                                                                                                                                                                                                                                                                   |                                                                                                                                                                                                                                                                                                                    |
| Observations                                                                | <input checked="" type="checkbox"/> Reported, verifiable methodology<br><input type="checkbox"/> Reported, unverifiable methodology                                                                                                                                                                                           |                                                                                                                                                                                                                                                                                                                                                                                                                                                                                                                   |                                                                                                                                                                                                                                                                                                                    |

|                                                                                               |                                                                                                                                                                                                                                                                        |
|-----------------------------------------------------------------------------------------------|------------------------------------------------------------------------------------------------------------------------------------------------------------------------------------------------------------------------------------------------------------------------|
|                                                                                               | <input type="checkbox"/> Unknown, unverifiable methodology                                                                                                                                                                                                             |
| Frequency                                                                                     | <input checked="" type="checkbox"/> > 1 time/year<br><input type="checkbox"/> 1 time/year:<br><input type="checkbox"/> < 1 time/year                                                                                                                                   |
| Future                                                                                        | <input type="checkbox"/> For $\geq 5$ years<br><input type="checkbox"/> between 1 and 5 years<br><input checked="" type="checkbox"/> no prospect                                                                                                                       |
| Quality of performers                                                                         | <input type="checkbox"/> Trained, professionals<br><input checked="" type="checkbox"/> Trained, non-professionals – volunteers<br><input type="checkbox"/> Uncertain or not -specified                                                                                 |
| Quality of data                                                                               | <input checked="" type="checkbox"/> Standard recording of raw data<br><input type="checkbox"/> Free recording of raw data<br><input type="checkbox"/> Anecdotic                                                                                                        |
| Analysis                                                                                      | <input type="checkbox"/> Reported, verifiable methodology<br><input type="checkbox"/> Reported, unverifiable methodology<br><input checked="" type="checkbox"/> Unknown, unverifiable methodology                                                                      |
| Quality of analysis                                                                           | <input type="checkbox"/> Scientifically based<br><input type="checkbox"/> Indicative only<br><input checked="" type="checkbox"/> Unknown                                                                                                                               |
| <b>REPORTING</b>                                                                              |                                                                                                                                                                                                                                                                        |
| Language                                                                                      | Specify reporting language(s) : ?                                                                                                                                                                                                                                      |
| Availability                                                                                  | <input type="checkbox"/> Scientific publication<br><input type="checkbox"/> Official report available on the internet or in other public forum<br><input type="checkbox"/> Official report available from network<br><input checked="" type="checkbox"/> Not available |
| Frequency                                                                                     | <input type="checkbox"/> $\geq 1$ time/year –<br><input type="checkbox"/> < 1 time/year –                                                                                                                                                                              |
| Historical reference                                                                          | <input type="checkbox"/> over $\geq 5$ years<br><input type="checkbox"/> between 1 and 5 years<br><input checked="" type="checkbox"/> no historical analysis                                                                                                           |
| <b>COMMENT(S)</b>                                                                             |                                                                                                                                                                                                                                                                        |
| Periodical journal. Punctual monitoring events such as in 2007 and scientific collaborations. |                                                                                                                                                                                                                                                                        |



## GSEN-09-0223.00.1 PT – SPEA

| EuropaBio's coordinated approach to General Surveillance: Existing Networks |                                                                                                                                                                                                                                                                                                                                                                                        |                                                                                                                                                                                                                                                                                                                                                                                                                                                                                                                   |                                                                                                                                                                                                                                                                                                         |
|-----------------------------------------------------------------------------|----------------------------------------------------------------------------------------------------------------------------------------------------------------------------------------------------------------------------------------------------------------------------------------------------------------------------------------------------------------------------------------|-------------------------------------------------------------------------------------------------------------------------------------------------------------------------------------------------------------------------------------------------------------------------------------------------------------------------------------------------------------------------------------------------------------------------------------------------------------------------------------------------------------------|---------------------------------------------------------------------------------------------------------------------------------------------------------------------------------------------------------------------------------------------------------------------------------------------------------|
| <b>ORGANISATION</b>                                                         |                                                                                                                                                                                                                                                                                                                                                                                        |                                                                                                                                                                                                                                                                                                                                                                                                                                                                                                                   |                                                                                                                                                                                                                                                                                                         |
| EuropaBio reference                                                         | GS-EN-09-0223                                                                                                                                                                                                                                                                                                                                                                          |                                                                                                                                                                                                                                                                                                                                                                                                                                                                                                                   |                                                                                                                                                                                                                                                                                                         |
| Official name of the Network                                                | <b>Sociedade Portuguesa para o Estudo das Aves</b>                                                                                                                                                                                                                                                                                                                                     |                                                                                                                                                                                                                                                                                                                                                                                                                                                                                                                   |                                                                                                                                                                                                                                                                                                         |
| Other names                                                                 | Portuguese Society for the Study of Birds; SPEA                                                                                                                                                                                                                                                                                                                                        |                                                                                                                                                                                                                                                                                                                                                                                                                                                                                                                   |                                                                                                                                                                                                                                                                                                         |
| Type of organisation                                                        | Nature conservation<br>Founded 1993                                                                                                                                                                                                                                                                                                                                                    |                                                                                                                                                                                                                                                                                                                                                                                                                                                                                                                   |                                                                                                                                                                                                                                                                                                         |
| Coordinates                                                                 | Avenida João Crisóstomo, n.º 18 - 4.º Dto.<br>1000-179 Lisboa<br><br>Fax: (+351) 21 322 04 39<br>Email: spea[at]spea.pt                                                                                                                                                                                                                                                                |                                                                                                                                                                                                                                                                                                                                                                                                                                                                                                                   |                                                                                                                                                                                                                                                                                                         |
| Website                                                                     | <a href="http://www.spea.pt">http://www.spea.pt</a>                                                                                                                                                                                                                                                                                                                                    |                                                                                                                                                                                                                                                                                                                                                                                                                                                                                                                   |                                                                                                                                                                                                                                                                                                         |
| Funding                                                                     | 2262 members, donations, shop                                                                                                                                                                                                                                                                                                                                                          |                                                                                                                                                                                                                                                                                                                                                                                                                                                                                                                   |                                                                                                                                                                                                                                                                                                         |
| Conflict of interest                                                        | -                                                                                                                                                                                                                                                                                                                                                                                      |                                                                                                                                                                                                                                                                                                                                                                                                                                                                                                                   |                                                                                                                                                                                                                                                                                                         |
| Part of other network(s)                                                    | BirdLife International                                                                                                                                                                                                                                                                                                                                                                 |                                                                                                                                                                                                                                                                                                                                                                                                                                                                                                                   |                                                                                                                                                                                                                                                                                                         |
| Grouping other network(s)                                                   | regional delegations                                                                                                                                                                                                                                                                                                                                                                   |                                                                                                                                                                                                                                                                                                                                                                                                                                                                                                                   |                                                                                                                                                                                                                                                                                                         |
| <b>MONITORING SUBJECT</b>                                                   |                                                                                                                                                                                                                                                                                                                                                                                        |                                                                                                                                                                                                                                                                                                                                                                                                                                                                                                                   |                                                                                                                                                                                                                                                                                                         |
| Description                                                                 | Study and the conservation of wild birds and their habitats by promoting sustainable development. Monitoring of Portuguese bird populations                                                                                                                                                                                                                                            |                                                                                                                                                                                                                                                                                                                                                                                                                                                                                                                   |                                                                                                                                                                                                                                                                                                         |
| Protection goal(s) and/or influencing factor(s)                             | <input checked="" type="checkbox"/> Protection goal<br><br><input checked="" type="checkbox"/> Biodiversity: Birds<br><input type="checkbox"/> Human Health<br><input type="checkbox"/> Animal Health<br><input type="checkbox"/> Plant Health<br><input type="checkbox"/> Soil function<br><input type="checkbox"/> Water quality<br><input type="checkbox"/> Sustainable Agriculture | <input type="checkbox"/> Influencing factor<br><br><input type="checkbox"/> Agronomic practice<br><input type="checkbox"/> Plant protection<br><input type="checkbox"/> GMO cultivation<br><input type="checkbox"/> Environmental conditions                                                                                                                                                                                                                                                                      |                                                                                                                                                                                                                                                                                                         |
| Duplication of Farmer's questionnaire                                       | <input checked="" type="checkbox"/> No duplication<br><input type="checkbox"/> Partly duplication<br><input type="checkbox"/> Complete duplication                                                                                                                                                                                                                                     |                                                                                                                                                                                                                                                                                                                                                                                                                                                                                                                   |                                                                                                                                                                                                                                                                                                         |
| <b>SPECIFICITY</b>                                                          |                                                                                                                                                                                                                                                                                                                                                                                        |                                                                                                                                                                                                                                                                                                                                                                                                                                                                                                                   |                                                                                                                                                                                                                                                                                                         |
| Geography                                                                   | <input type="checkbox"/> EU -wide<br><br><input type="checkbox"/> Zone A – North<br><input type="checkbox"/> Zone B – Centre:<br><input type="checkbox"/> Zone C – South                                                                                                                                                                                                               |                                                                                                                                                                                                                                                                                                                                                                                                                                                                                                                   |                                                                                                                                                                                                                                                                                                         |
|                                                                             | <input type="checkbox"/> Denmark,<br><input type="checkbox"/> Estonia,<br><input type="checkbox"/> Latvia,<br><input type="checkbox"/> Lithuania,<br><input type="checkbox"/> Finland,<br><input type="checkbox"/> Sweden                                                                                                                                                              | <input type="checkbox"/> Belgium,<br><input type="checkbox"/> Czech Republic<br><input type="checkbox"/> Germany,<br><input type="checkbox"/> Ireland,<br><input type="checkbox"/> Luxembourg,<br><input type="checkbox"/> Hungary,<br><input type="checkbox"/> Netherlands,<br><input type="checkbox"/> Austria,<br><input type="checkbox"/> Poland,<br><input type="checkbox"/> Romania,<br><input type="checkbox"/> Slovenia,<br><input type="checkbox"/> Slovakia,<br><input type="checkbox"/> United Kingdom | <input type="checkbox"/> Bulgaria,<br><input type="checkbox"/> Greece,<br><input type="checkbox"/> Spain,<br><input type="checkbox"/> France,<br><input type="checkbox"/> Italy,<br><input type="checkbox"/> Cyprus,<br><input type="checkbox"/> Malta,<br><input checked="" type="checkbox"/> Portugal |
|                                                                             | <input type="checkbox"/> Regional (specify)<br><input type="checkbox"/> Local (specify)                                                                                                                                                                                                                                                                                                |                                                                                                                                                                                                                                                                                                                                                                                                                                                                                                                   |                                                                                                                                                                                                                                                                                                         |
| Factors                                                                     | <input checked="" type="checkbox"/> Multiple species/items (specify): different bird species<br><input type="checkbox"/> Single species/item (specify)                                                                                                                                                                                                                                 |                                                                                                                                                                                                                                                                                                                                                                                                                                                                                                                   |                                                                                                                                                                                                                                                                                                         |
| Crop                                                                        | <input checked="" type="checkbox"/> No specific crop(s)<br><input type="checkbox"/> Several crops (e.g. all cereals)<br><input type="checkbox"/> Single crop                                                                                                                                                                                                                           |                                                                                                                                                                                                                                                                                                                                                                                                                                                                                                                   |                                                                                                                                                                                                                                                                                                         |
| Trait /treatment                                                            | <input checked="" type="checkbox"/> No specific traits/treatments<br><input type="checkbox"/> Several traits/treatments<br><input type="checkbox"/> Single trait/treatment                                                                                                                                                                                                             |                                                                                                                                                                                                                                                                                                                                                                                                                                                                                                                   |                                                                                                                                                                                                                                                                                                         |
| GMO                                                                         | <input checked="" type="checkbox"/> No GMO bias<br><input type="checkbox"/> GMO specific                                                                                                                                                                                                                                                                                               |                                                                                                                                                                                                                                                                                                                                                                                                                                                                                                                   |                                                                                                                                                                                                                                                                                                         |
| <b>METHODOLOGY</b>                                                          |                                                                                                                                                                                                                                                                                                                                                                                        |                                                                                                                                                                                                                                                                                                                                                                                                                                                                                                                   |                                                                                                                                                                                                                                                                                                         |

|                                                                                                                          |                                                                                                                                                                                                                                                                        |
|--------------------------------------------------------------------------------------------------------------------------|------------------------------------------------------------------------------------------------------------------------------------------------------------------------------------------------------------------------------------------------------------------------|
| Observations                                                                                                             | <input checked="" type="checkbox"/> Reported, verifiable methodology<br><input type="checkbox"/> Reported, unverifiable methodology<br><input type="checkbox"/> Unknown, unverifiable methodology                                                                      |
| Frequency                                                                                                                | <input checked="" type="checkbox"/> > 1 time/year<br><input type="checkbox"/> 1 time/year<br><input type="checkbox"/> < 1 time/year                                                                                                                                    |
| Future                                                                                                                   | <input checked="" type="checkbox"/> For $\geq 5$ years<br><input type="checkbox"/> between 1 and 5 years<br><input type="checkbox"/> no prospect                                                                                                                       |
| Quality of performers                                                                                                    | <input type="checkbox"/> Trained, professionals<br><input checked="" type="checkbox"/> Trained, non-professionals – training by documentation, training sessions, volunteers<br><input type="checkbox"/> Uncertain or not -specified                                   |
| Quality of data                                                                                                          | <input checked="" type="checkbox"/> Standard recording of raw data<br><input type="checkbox"/> Free recording of raw data<br><input type="checkbox"/> Anecdotic                                                                                                        |
| Analysis                                                                                                                 | <input checked="" type="checkbox"/> Reported, verifiable methodology<br><input type="checkbox"/> Reported, unverifiable methodology<br><input type="checkbox"/> Unknown, unverifiable methodology                                                                      |
| Quality of analysis                                                                                                      | <input checked="" type="checkbox"/> Scientifically based<br><input type="checkbox"/> Indicative only<br><input type="checkbox"/> Unknown                                                                                                                               |
| <b>REPORTING</b>                                                                                                         |                                                                                                                                                                                                                                                                        |
| Language                                                                                                                 | Specify reporting language(s): Portuguese                                                                                                                                                                                                                              |
| Availability                                                                                                             | <input type="checkbox"/> Scientific publication<br><input checked="" type="checkbox"/> Official report available on the internet or in other public forum<br><input type="checkbox"/> Official report available from network<br><input type="checkbox"/> Not available |
| Frequency                                                                                                                | <input checked="" type="checkbox"/> $\geq 1$ time/year – Yearly countings<br><input type="checkbox"/> < 1 time/year – Atlas                                                                                                                                            |
| Historical reference                                                                                                     | <input checked="" type="checkbox"/> over $\geq 5$ years<br><input type="checkbox"/> between 1 and 5 years<br><input type="checkbox"/> no historical analysis                                                                                                           |
| <b>COMMENT(S)</b>                                                                                                        |                                                                                                                                                                                                                                                                        |
| Monitoring network using important bird species as representative indicators and as protection goals. Atlas, newsletter. |                                                                                                                                                                                                                                                                        |

**GSEN-09-0233.00.1 PT – Min Agric. soil, sust. agric. agron.pract.**

| <b>EuropaBio's coordinated approach to General Surveillance: Existing Networks</b> |                                                                                                                                                                                                                                                                                                                                                                                        |                                                                                                                                                                                                                                                                                                                                                                                                                                                                                                                   |                                                                                                                                                                                                                                                                                                         |
|------------------------------------------------------------------------------------|----------------------------------------------------------------------------------------------------------------------------------------------------------------------------------------------------------------------------------------------------------------------------------------------------------------------------------------------------------------------------------------|-------------------------------------------------------------------------------------------------------------------------------------------------------------------------------------------------------------------------------------------------------------------------------------------------------------------------------------------------------------------------------------------------------------------------------------------------------------------------------------------------------------------|---------------------------------------------------------------------------------------------------------------------------------------------------------------------------------------------------------------------------------------------------------------------------------------------------------|
| <b>ORGANISATION</b>                                                                |                                                                                                                                                                                                                                                                                                                                                                                        |                                                                                                                                                                                                                                                                                                                                                                                                                                                                                                                   |                                                                                                                                                                                                                                                                                                         |
| EuropaBio reference                                                                | GS-EN-09-0233                                                                                                                                                                                                                                                                                                                                                                          |                                                                                                                                                                                                                                                                                                                                                                                                                                                                                                                   |                                                                                                                                                                                                                                                                                                         |
| Official name of the Network                                                       | <b>Ministério da Agricultura, do Desenvolvimento Rural e das Pescas;<br/>Direcção Geral de Agricultura e Desenvolvimento Rural</b>                                                                                                                                                                                                                                                     |                                                                                                                                                                                                                                                                                                                                                                                                                                                                                                                   |                                                                                                                                                                                                                                                                                                         |
| Other names                                                                        | Portuguese Ministry of Agriculture; DGADR                                                                                                                                                                                                                                                                                                                                              |                                                                                                                                                                                                                                                                                                                                                                                                                                                                                                                   |                                                                                                                                                                                                                                                                                                         |
| Type of organisation                                                               | Governmental                                                                                                                                                                                                                                                                                                                                                                           |                                                                                                                                                                                                                                                                                                                                                                                                                                                                                                                   |                                                                                                                                                                                                                                                                                                         |
| Coordinates                                                                        | Av. Afonso Costa, 3<br>1949-002 Lisbon<br><br>E-mail - dgadr[at]dgadr.pt                                                                                                                                                                                                                                                                                                               |                                                                                                                                                                                                                                                                                                                                                                                                                                                                                                                   |                                                                                                                                                                                                                                                                                                         |
| Website                                                                            | <a href="http://www.dgadr.mamaot.pt/">http://www.dgadr.mamaot.pt/</a><br><a href="http://www.dgadr.mamaot.pt/cartografia">http://www.dgadr.mamaot.pt/cartografia</a>                                                                                                                                                                                                                   |                                                                                                                                                                                                                                                                                                                                                                                                                                                                                                                   |                                                                                                                                                                                                                                                                                                         |
| Funding                                                                            | Government                                                                                                                                                                                                                                                                                                                                                                             |                                                                                                                                                                                                                                                                                                                                                                                                                                                                                                                   |                                                                                                                                                                                                                                                                                                         |
| Conflict of interest                                                               | -                                                                                                                                                                                                                                                                                                                                                                                      |                                                                                                                                                                                                                                                                                                                                                                                                                                                                                                                   |                                                                                                                                                                                                                                                                                                         |
| Part of other network(s)                                                           |                                                                                                                                                                                                                                                                                                                                                                                        |                                                                                                                                                                                                                                                                                                                                                                                                                                                                                                                   |                                                                                                                                                                                                                                                                                                         |
| Grouping other network(s)                                                          |                                                                                                                                                                                                                                                                                                                                                                                        |                                                                                                                                                                                                                                                                                                                                                                                                                                                                                                                   |                                                                                                                                                                                                                                                                                                         |
| <b>MONITORING SUBJECT</b>                                                          |                                                                                                                                                                                                                                                                                                                                                                                        |                                                                                                                                                                                                                                                                                                                                                                                                                                                                                                                   |                                                                                                                                                                                                                                                                                                         |
| Description                                                                        | Government providing information for farmers                                                                                                                                                                                                                                                                                                                                           |                                                                                                                                                                                                                                                                                                                                                                                                                                                                                                                   |                                                                                                                                                                                                                                                                                                         |
| Protection goal(s) and/or influencing factor(s)                                    | <input checked="" type="checkbox"/> Protection goal<br><input type="checkbox"/> Biodiversity<br><input type="checkbox"/> Human Health<br><input type="checkbox"/> Animal Health<br><input type="checkbox"/> Plant Health<br><input checked="" type="checkbox"/> Soil function<br><input type="checkbox"/> Water quality<br><input checked="" type="checkbox"/> Sustainable Agriculture | <input checked="" type="checkbox"/> Influencing factor<br><input checked="" type="checkbox"/> Agronomic practice<br><input type="checkbox"/> Plant protection<br><input type="checkbox"/> GMO cultivation<br><input type="checkbox"/> Environmental conditions                                                                                                                                                                                                                                                    |                                                                                                                                                                                                                                                                                                         |
| Duplication of Farmer's questionnaire                                              | <input checked="" type="checkbox"/> No duplication<br><input type="checkbox"/> Partly duplication<br><input type="checkbox"/> Complete duplication                                                                                                                                                                                                                                     |                                                                                                                                                                                                                                                                                                                                                                                                                                                                                                                   |                                                                                                                                                                                                                                                                                                         |
| <b>SPECIFICITY</b>                                                                 |                                                                                                                                                                                                                                                                                                                                                                                        |                                                                                                                                                                                                                                                                                                                                                                                                                                                                                                                   |                                                                                                                                                                                                                                                                                                         |
| Geography                                                                          | <input type="checkbox"/> EU -wide<br><input type="checkbox"/> Zone A – North<br><input type="checkbox"/> Zone B – Centre:<br><input checked="" type="checkbox"/> Zone C – South                                                                                                                                                                                                        |                                                                                                                                                                                                                                                                                                                                                                                                                                                                                                                   |                                                                                                                                                                                                                                                                                                         |
|                                                                                    | <input type="checkbox"/> Denmark,<br><input type="checkbox"/> Estonia,<br><input type="checkbox"/> Latvia,<br><input type="checkbox"/> Lithuania,<br><input type="checkbox"/> Finland,<br><input type="checkbox"/> Sweden                                                                                                                                                              | <input type="checkbox"/> Belgium,<br><input type="checkbox"/> Czech Republic<br><input type="checkbox"/> Germany,<br><input type="checkbox"/> Ireland,<br><input type="checkbox"/> Luxembourg,<br><input type="checkbox"/> Hungary,<br><input type="checkbox"/> Netherlands,<br><input type="checkbox"/> Austria,<br><input type="checkbox"/> Poland,<br><input type="checkbox"/> Romania,<br><input type="checkbox"/> Slovenia,<br><input type="checkbox"/> Slovakia,<br><input type="checkbox"/> United Kingdom | <input type="checkbox"/> Bulgaria,<br><input type="checkbox"/> Greece,<br><input type="checkbox"/> Spain,<br><input type="checkbox"/> France,<br><input type="checkbox"/> Italy,<br><input type="checkbox"/> Cyprus,<br><input type="checkbox"/> Malta,<br><input checked="" type="checkbox"/> Portugal |
|                                                                                    | <input type="checkbox"/> Regional (specify)<br><input type="checkbox"/> Local (specify)                                                                                                                                                                                                                                                                                                |                                                                                                                                                                                                                                                                                                                                                                                                                                                                                                                   |                                                                                                                                                                                                                                                                                                         |
| Factors                                                                            | <input checked="" type="checkbox"/> Multiple species/items (specify): soil (use), machanisation,<br><input type="checkbox"/> Single species/item (specify)                                                                                                                                                                                                                             |                                                                                                                                                                                                                                                                                                                                                                                                                                                                                                                   |                                                                                                                                                                                                                                                                                                         |
| Crop                                                                               | <input checked="" type="checkbox"/> No specific crop(s)<br><input type="checkbox"/> Several crops (e.g. all cereals)<br><input type="checkbox"/> Single crop:                                                                                                                                                                                                                          |                                                                                                                                                                                                                                                                                                                                                                                                                                                                                                                   |                                                                                                                                                                                                                                                                                                         |
| Trait /treatment                                                                   | <input checked="" type="checkbox"/> No specific traits/treatments<br><input type="checkbox"/> Several traits/treatments<br><input type="checkbox"/> Single trait/treatment                                                                                                                                                                                                             |                                                                                                                                                                                                                                                                                                                                                                                                                                                                                                                   |                                                                                                                                                                                                                                                                                                         |
| GMO                                                                                | <input checked="" type="checkbox"/> No GMO bias<br><input type="checkbox"/> GMO specific                                                                                                                                                                                                                                                                                               |                                                                                                                                                                                                                                                                                                                                                                                                                                                                                                                   |                                                                                                                                                                                                                                                                                                         |
| <b>METHODOLOGY</b>                                                                 |                                                                                                                                                                                                                                                                                                                                                                                        |                                                                                                                                                                                                                                                                                                                                                                                                                                                                                                                   |                                                                                                                                                                                                                                                                                                         |
| Observations                                                                       | <input type="checkbox"/> Reported, verifiable methodology                                                                                                                                                                                                                                                                                                                              |                                                                                                                                                                                                                                                                                                                                                                                                                                                                                                                   |                                                                                                                                                                                                                                                                                                         |

|                                                                                                                                                            |                                                                                                                                                                                                                                                                        |
|------------------------------------------------------------------------------------------------------------------------------------------------------------|------------------------------------------------------------------------------------------------------------------------------------------------------------------------------------------------------------------------------------------------------------------------|
|                                                                                                                                                            | <input type="checkbox"/> Reported, unverifiable methodology<br><input checked="" type="checkbox"/> Unknown, unverifiable methodology                                                                                                                                   |
| Frequency                                                                                                                                                  | <input type="checkbox"/> > 1 time/year<br><input checked="" type="checkbox"/> 1 time/year<br><input checked="" type="checkbox"/> < 1 time/year                                                                                                                         |
| Future                                                                                                                                                     | <input checked="" type="checkbox"/> For ≥ 5 years<br><input type="checkbox"/> between 1 and 5 years<br><input type="checkbox"/> no prospect                                                                                                                            |
| Quality of performers                                                                                                                                      | <input checked="" type="checkbox"/> Trained, professionals<br><input type="checkbox"/> Trained, non-professionals – training by documentation, volunteers<br><input type="checkbox"/> Uncertain or not -specified                                                      |
| Quality of data                                                                                                                                            | <input type="checkbox"/> Standard recording of raw data<br><input type="checkbox"/> Free recording of raw data<br><input type="checkbox"/> Anecdotic                                                                                                                   |
| Analysis                                                                                                                                                   | <input type="checkbox"/> Reported, verifiable methodology<br><input type="checkbox"/> Reported, unverifiable methodology<br><input checked="" type="checkbox"/> Unknown, unverifiable methodology                                                                      |
| Quality of analysis                                                                                                                                        | <input type="checkbox"/> Scientifically based<br><input type="checkbox"/> Indicative only<br><input checked="" type="checkbox"/> Unknown                                                                                                                               |
| <b>REPORTING</b>                                                                                                                                           |                                                                                                                                                                                                                                                                        |
| Language                                                                                                                                                   | Reporting language(s): Portuguese                                                                                                                                                                                                                                      |
| Availability                                                                                                                                               | <input type="checkbox"/> Scientific publication<br><input checked="" type="checkbox"/> Official report available on the internet or in other public forum<br><input type="checkbox"/> Official report available from network<br><input type="checkbox"/> Not available |
| Frequency                                                                                                                                                  | <input checked="" type="checkbox"/> ≥ 1 time/year<br><input type="checkbox"/> < 1 time/year                                                                                                                                                                            |
| Historical reference                                                                                                                                       | <input type="checkbox"/> over ≥ 5 years<br><input type="checkbox"/> between 1 and 5 years<br><input checked="" type="checkbox"/> no historical analysis                                                                                                                |
| <b>COMMENT(S)</b>                                                                                                                                          |                                                                                                                                                                                                                                                                        |
| Official communication channel. Providing guidance on sustainable agriculture, organic, integrated farming, by-products as fertilizer. Recording soil use. |                                                                                                                                                                                                                                                                        |

## Romania

## GSEN-09-0061.00.2 RO – Min Environment

| EuropaBio's coordinated approach to General Surveillance: Existing Networks |                                                                                                                                                                                                                                                                                                                                                                             |                                                                                                                                                                                                                                                                                                                                                                                                                                                                                                                              |                                                                                                                                                                                                                                                                                              |
|-----------------------------------------------------------------------------|-----------------------------------------------------------------------------------------------------------------------------------------------------------------------------------------------------------------------------------------------------------------------------------------------------------------------------------------------------------------------------|------------------------------------------------------------------------------------------------------------------------------------------------------------------------------------------------------------------------------------------------------------------------------------------------------------------------------------------------------------------------------------------------------------------------------------------------------------------------------------------------------------------------------|----------------------------------------------------------------------------------------------------------------------------------------------------------------------------------------------------------------------------------------------------------------------------------------------|
| ORGANISATION                                                                |                                                                                                                                                                                                                                                                                                                                                                             |                                                                                                                                                                                                                                                                                                                                                                                                                                                                                                                              |                                                                                                                                                                                                                                                                                              |
| EuropaBio reference                                                         | GS-EN-09-0061                                                                                                                                                                                                                                                                                                                                                               |                                                                                                                                                                                                                                                                                                                                                                                                                                                                                                                              |                                                                                                                                                                                                                                                                                              |
| Official name of the Network                                                | <b>Ministerul Mediului</b>                                                                                                                                                                                                                                                                                                                                                  |                                                                                                                                                                                                                                                                                                                                                                                                                                                                                                                              |                                                                                                                                                                                                                                                                                              |
| Other names                                                                 | Ministry of the Environment and Forestry: Environment Dept.                                                                                                                                                                                                                                                                                                                 |                                                                                                                                                                                                                                                                                                                                                                                                                                                                                                                              |                                                                                                                                                                                                                                                                                              |
| Type of organisation                                                        | Governmental<br>Founded (unknown)                                                                                                                                                                                                                                                                                                                                           |                                                                                                                                                                                                                                                                                                                                                                                                                                                                                                                              |                                                                                                                                                                                                                                                                                              |
| Coordinates                                                                 | B-dul Libertății nr. 12, Sector 5<br>Bucharest                                                                                                                                                                                                                                                                                                                              |                                                                                                                                                                                                                                                                                                                                                                                                                                                                                                                              |                                                                                                                                                                                                                                                                                              |
| Website                                                                     | <a href="http://www.mmediu.ro/starea_mediului.htm">http://www.mmediu.ro/starea_mediului.htm</a>                                                                                                                                                                                                                                                                             |                                                                                                                                                                                                                                                                                                                                                                                                                                                                                                                              |                                                                                                                                                                                                                                                                                              |
| Funding                                                                     | Government                                                                                                                                                                                                                                                                                                                                                                  |                                                                                                                                                                                                                                                                                                                                                                                                                                                                                                                              |                                                                                                                                                                                                                                                                                              |
| Conflict of interest                                                        | -                                                                                                                                                                                                                                                                                                                                                                           |                                                                                                                                                                                                                                                                                                                                                                                                                                                                                                                              |                                                                                                                                                                                                                                                                                              |
| Part of other network(s)                                                    |                                                                                                                                                                                                                                                                                                                                                                             |                                                                                                                                                                                                                                                                                                                                                                                                                                                                                                                              |                                                                                                                                                                                                                                                                                              |
| Grouping other network(s)                                                   |                                                                                                                                                                                                                                                                                                                                                                             |                                                                                                                                                                                                                                                                                                                                                                                                                                                                                                                              |                                                                                                                                                                                                                                                                                              |
| MONITORING SUBJECT                                                          |                                                                                                                                                                                                                                                                                                                                                                             |                                                                                                                                                                                                                                                                                                                                                                                                                                                                                                                              |                                                                                                                                                                                                                                                                                              |
| Description                                                                 | Daily reporting on "State of the Environment" (hydrometeorological information, water quality environmental quality)                                                                                                                                                                                                                                                        |                                                                                                                                                                                                                                                                                                                                                                                                                                                                                                                              |                                                                                                                                                                                                                                                                                              |
| Protection goal(s) and/or influencing factor(s)                             | <input checked="" type="checkbox"/> Protection goal<br><input type="checkbox"/> Biodiversity<br><input type="checkbox"/> Human Health<br><input type="checkbox"/> Animal Health<br><input type="checkbox"/> Plant Health<br><input type="checkbox"/> Soil function<br><input checked="" type="checkbox"/> Water quality<br><input type="checkbox"/> Sustainable Agriculture | <input checked="" type="checkbox"/> Influencing factor<br><input type="checkbox"/> Agronomic practice<br><input type="checkbox"/> Plant protection<br><input type="checkbox"/> GMO cultivation<br><input checked="" type="checkbox"/> Environmental conditions                                                                                                                                                                                                                                                               |                                                                                                                                                                                                                                                                                              |
| Duplication of Farmer's questionnaire                                       | <input checked="" type="checkbox"/> No duplication<br><input type="checkbox"/> Partly duplication<br><input type="checkbox"/> Complete duplication                                                                                                                                                                                                                          |                                                                                                                                                                                                                                                                                                                                                                                                                                                                                                                              |                                                                                                                                                                                                                                                                                              |
| SPECIFICITY                                                                 |                                                                                                                                                                                                                                                                                                                                                                             |                                                                                                                                                                                                                                                                                                                                                                                                                                                                                                                              |                                                                                                                                                                                                                                                                                              |
| Geography                                                                   | <input type="checkbox"/> EU -wide                                                                                                                                                                                                                                                                                                                                           |                                                                                                                                                                                                                                                                                                                                                                                                                                                                                                                              |                                                                                                                                                                                                                                                                                              |
|                                                                             | <input type="checkbox"/> Zone A – North                                                                                                                                                                                                                                                                                                                                     | <input checked="" type="checkbox"/> Zone B – Centre:                                                                                                                                                                                                                                                                                                                                                                                                                                                                         | <input type="checkbox"/> Zone C – South                                                                                                                                                                                                                                                      |
|                                                                             | <input type="checkbox"/> Denmark,<br><input type="checkbox"/> Estonia,<br><input type="checkbox"/> Latvia,<br><input type="checkbox"/> Lithuania,<br><input type="checkbox"/> Finland,<br><input type="checkbox"/> Sweden                                                                                                                                                   | <input type="checkbox"/> Belgium,<br><input type="checkbox"/> Czech Republic<br><input type="checkbox"/> Germany,<br><input type="checkbox"/> Ireland,<br><input type="checkbox"/> Luxembourg,<br><input type="checkbox"/> Hungary,<br><input type="checkbox"/> Netherlands,<br><input type="checkbox"/> Austria,<br><input type="checkbox"/> Poland,<br><input checked="" type="checkbox"/> Romania,<br><input type="checkbox"/> Slovenia,<br><input type="checkbox"/> Slovakia,<br><input type="checkbox"/> United Kingdom | <input type="checkbox"/> Bulgaria,<br><input type="checkbox"/> Greece,<br><input type="checkbox"/> Spain,<br><input type="checkbox"/> France,<br><input type="checkbox"/> Italy,<br><input type="checkbox"/> Cyprus,<br><input type="checkbox"/> Malta,<br><input type="checkbox"/> Portugal |
|                                                                             | <input type="checkbox"/> Regional (specify)<br><input type="checkbox"/> Local (specify)                                                                                                                                                                                                                                                                                     |                                                                                                                                                                                                                                                                                                                                                                                                                                                                                                                              |                                                                                                                                                                                                                                                                                              |
| Factors                                                                     | <input checked="" type="checkbox"/> Multiple species/items (specify): environmental parameters<br><input type="checkbox"/> Single species/item (specify)                                                                                                                                                                                                                    |                                                                                                                                                                                                                                                                                                                                                                                                                                                                                                                              |                                                                                                                                                                                                                                                                                              |
| Crop                                                                        | <input checked="" type="checkbox"/> No specific crop(s)<br><input type="checkbox"/> Several crops (e.g. all cereals)<br><input type="checkbox"/> Single crop                                                                                                                                                                                                                |                                                                                                                                                                                                                                                                                                                                                                                                                                                                                                                              |                                                                                                                                                                                                                                                                                              |
| Trait /treatment                                                            | <input checked="" type="checkbox"/> No specific traits/treatments<br><input type="checkbox"/> Several traits/treatments<br><input type="checkbox"/> Single trait/treatment                                                                                                                                                                                                  |                                                                                                                                                                                                                                                                                                                                                                                                                                                                                                                              |                                                                                                                                                                                                                                                                                              |
| GMO                                                                         | <input checked="" type="checkbox"/> No GMO bias<br><input type="checkbox"/> GMO specific                                                                                                                                                                                                                                                                                    |                                                                                                                                                                                                                                                                                                                                                                                                                                                                                                                              |                                                                                                                                                                                                                                                                                              |
| METHODOLOGY                                                                 |                                                                                                                                                                                                                                                                                                                                                                             |                                                                                                                                                                                                                                                                                                                                                                                                                                                                                                                              |                                                                                                                                                                                                                                                                                              |
| Observations                                                                | <input type="checkbox"/> Reported, verifiable methodology<br><input type="checkbox"/> Reported, unverifiable methodology<br><input type="checkbox"/> Unknown, unverifiable methodology                                                                                                                                                                                      |                                                                                                                                                                                                                                                                                                                                                                                                                                                                                                                              |                                                                                                                                                                                                                                                                                              |

|                                                                       |                                                                                                                                                                                                                                                                        |
|-----------------------------------------------------------------------|------------------------------------------------------------------------------------------------------------------------------------------------------------------------------------------------------------------------------------------------------------------------|
| Frequency                                                             | <input checked="" type="checkbox"/> > 1 time/year<br><input type="checkbox"/> 1 time/year<br><input type="checkbox"/> < 1 time/year                                                                                                                                    |
| Future                                                                | <input checked="" type="checkbox"/> For $\geq$ 5 years<br><input type="checkbox"/> between 1 and 5 years<br><input type="checkbox"/> no prospect                                                                                                                       |
| Quality of performers                                                 | <input checked="" type="checkbox"/> Trained, professionals<br><input type="checkbox"/> Trained, non-professionals – training by documentation, volunteers<br><input type="checkbox"/> Uncertain or not -specified                                                      |
| Quality of data                                                       | <input checked="" type="checkbox"/> Standard recording of raw data<br><input type="checkbox"/> Free recording of raw data<br><input type="checkbox"/> Anecdotic                                                                                                        |
| Analysis                                                              | <input type="checkbox"/> Reported, verifiable methodology<br><input type="checkbox"/> Reported, unverifiable methodology<br><input type="checkbox"/> Unknown, unverifiable methodology                                                                                 |
| Quality of analysis                                                   | <input checked="" type="checkbox"/> Scientifically based<br><input type="checkbox"/> Indicative only<br><input type="checkbox"/> Unknown                                                                                                                               |
| <b>REPORTING</b>                                                      |                                                                                                                                                                                                                                                                        |
| Language                                                              | Reporting language(s): Romanian/English                                                                                                                                                                                                                                |
| Availability                                                          | <input type="checkbox"/> Scientific publication<br><input checked="" type="checkbox"/> Official report available on the internet or in other public forum<br><input type="checkbox"/> Official report available from network<br><input type="checkbox"/> Not available |
| Frequency                                                             | <input checked="" type="checkbox"/> $\geq$ 1 time/year<br><input type="checkbox"/> < 1 time/year                                                                                                                                                                       |
| Historical reference                                                  | <input type="checkbox"/> over $\geq$ 5 years<br><input checked="" type="checkbox"/> between 1 and 5 years<br><input type="checkbox"/> no historical analysis                                                                                                           |
| <b>COMMENT(S)</b>                                                     |                                                                                                                                                                                                                                                                        |
| Official communication channel. Some historical reference in archive. |                                                                                                                                                                                                                                                                        |

## GSEN-09-0062.00.2 RO – NEPA

| EuropaBio's coordinated approach to General Surveillance: Existing Networks |                                                                                                                                                                                                                                                                                                                                                                                       |                                                                                                                                                                                                                                                                                                                                                                                                                                                                                                                              |                                                                                                                                                                                                                                                                                              |
|-----------------------------------------------------------------------------|---------------------------------------------------------------------------------------------------------------------------------------------------------------------------------------------------------------------------------------------------------------------------------------------------------------------------------------------------------------------------------------|------------------------------------------------------------------------------------------------------------------------------------------------------------------------------------------------------------------------------------------------------------------------------------------------------------------------------------------------------------------------------------------------------------------------------------------------------------------------------------------------------------------------------|----------------------------------------------------------------------------------------------------------------------------------------------------------------------------------------------------------------------------------------------------------------------------------------------|
| <b>ORGANISATION</b>                                                         |                                                                                                                                                                                                                                                                                                                                                                                       |                                                                                                                                                                                                                                                                                                                                                                                                                                                                                                                              |                                                                                                                                                                                                                                                                                              |
| EuropaBio reference                                                         | GS-EN-09-0062                                                                                                                                                                                                                                                                                                                                                                         |                                                                                                                                                                                                                                                                                                                                                                                                                                                                                                                              |                                                                                                                                                                                                                                                                                              |
| Official name of the Network                                                | <b>Ministerului Mediului<br/>Agenția Națională pentru Protecția Mediului</b>                                                                                                                                                                                                                                                                                                          |                                                                                                                                                                                                                                                                                                                                                                                                                                                                                                                              |                                                                                                                                                                                                                                                                                              |
| Other names                                                                 | National Environmental Protection Agency - Directorate for Nature Conservation, Biodiversity, Ground, Underground                                                                                                                                                                                                                                                                     |                                                                                                                                                                                                                                                                                                                                                                                                                                                                                                                              |                                                                                                                                                                                                                                                                                              |
| Type of organisation                                                        | Governmental<br>Founded 1997                                                                                                                                                                                                                                                                                                                                                          |                                                                                                                                                                                                                                                                                                                                                                                                                                                                                                                              |                                                                                                                                                                                                                                                                                              |
| Coordinates                                                                 | plaiul Independenței, no.294, Sector 6,<br>Bucharest, Cod 060031<br><br>Fax: 021-207.11.03<br>Email: office[at]anpm.ro                                                                                                                                                                                                                                                                |                                                                                                                                                                                                                                                                                                                                                                                                                                                                                                                              |                                                                                                                                                                                                                                                                                              |
| Website                                                                     | <a href="http://www.anpm.ro/">http://www.anpm.ro/</a><br><a href="http://www.anpm.ro/Mediu/raport_privind_starea_mediului_in_romania-15">http://www.anpm.ro/Mediu/raport_privind_starea_mediului_in_romania-15</a><br><a href="http://www.anpm.ro/articole/registre-64">http://www.anpm.ro/articole/registre-64</a>                                                                   |                                                                                                                                                                                                                                                                                                                                                                                                                                                                                                                              |                                                                                                                                                                                                                                                                                              |
| Funding                                                                     | Public                                                                                                                                                                                                                                                                                                                                                                                |                                                                                                                                                                                                                                                                                                                                                                                                                                                                                                                              |                                                                                                                                                                                                                                                                                              |
| Conflict of interest                                                        | -                                                                                                                                                                                                                                                                                                                                                                                     |                                                                                                                                                                                                                                                                                                                                                                                                                                                                                                                              |                                                                                                                                                                                                                                                                                              |
| Part of other network(s)                                                    |                                                                                                                                                                                                                                                                                                                                                                                       |                                                                                                                                                                                                                                                                                                                                                                                                                                                                                                                              |                                                                                                                                                                                                                                                                                              |
| Grouping other network(s)                                                   |                                                                                                                                                                                                                                                                                                                                                                                       |                                                                                                                                                                                                                                                                                                                                                                                                                                                                                                                              |                                                                                                                                                                                                                                                                                              |
| <b>MONITORING SUBJECT</b>                                                   |                                                                                                                                                                                                                                                                                                                                                                                       |                                                                                                                                                                                                                                                                                                                                                                                                                                                                                                                              |                                                                                                                                                                                                                                                                                              |
| Description                                                                 | Promoting sustainable development                                                                                                                                                                                                                                                                                                                                                     |                                                                                                                                                                                                                                                                                                                                                                                                                                                                                                                              |                                                                                                                                                                                                                                                                                              |
| Protection goal(s) and/or influencing factor(s)                             | <input checked="" type="checkbox"/> Protection goal<br><input checked="" type="checkbox"/> Biodiversity / General<br><input type="checkbox"/> Human Health<br><input type="checkbox"/> Animal Health<br><input type="checkbox"/> Plant Health<br><input type="checkbox"/> Soil function<br><input type="checkbox"/> Water quality<br><input type="checkbox"/> Sustainable Agriculture | <input checked="" type="checkbox"/> Influencing factor<br><input checked="" type="checkbox"/> Agronomic practice<br><input type="checkbox"/> Plant protection<br><input checked="" type="checkbox"/> GMO cultivation<br><input checked="" type="checkbox"/> Environmental conditions                                                                                                                                                                                                                                         |                                                                                                                                                                                                                                                                                              |
| Duplication of Farmer's questionnaire                                       | <input checked="" type="checkbox"/> No duplication<br><input type="checkbox"/> Partly duplication<br><input type="checkbox"/> Complete duplication                                                                                                                                                                                                                                    |                                                                                                                                                                                                                                                                                                                                                                                                                                                                                                                              |                                                                                                                                                                                                                                                                                              |
| <b>SPECIFICITY</b>                                                          |                                                                                                                                                                                                                                                                                                                                                                                       |                                                                                                                                                                                                                                                                                                                                                                                                                                                                                                                              |                                                                                                                                                                                                                                                                                              |
| Geography                                                                   | <input type="checkbox"/> EU -wide<br><input type="checkbox"/> Zone A – North<br><input checked="" type="checkbox"/> Zone B – Centre:<br><input type="checkbox"/> Zone C – South                                                                                                                                                                                                       |                                                                                                                                                                                                                                                                                                                                                                                                                                                                                                                              |                                                                                                                                                                                                                                                                                              |
|                                                                             | <input type="checkbox"/> Denmark,<br><input type="checkbox"/> Estonia,<br><input type="checkbox"/> Latvia,<br><input type="checkbox"/> Lithuania,<br><input type="checkbox"/> Finland,<br><input type="checkbox"/> Sweden                                                                                                                                                             | <input type="checkbox"/> Belgium,<br><input type="checkbox"/> Czech Republic<br><input type="checkbox"/> Germany,<br><input type="checkbox"/> Ireland,<br><input type="checkbox"/> Luxembourg,<br><input type="checkbox"/> Hungary,<br><input type="checkbox"/> Netherlands,<br><input type="checkbox"/> Austria,<br><input type="checkbox"/> Poland,<br><input checked="" type="checkbox"/> Romania,<br><input type="checkbox"/> Slovenia,<br><input type="checkbox"/> Slovakia,<br><input type="checkbox"/> United Kingdom | <input type="checkbox"/> Bulgaria,<br><input type="checkbox"/> Greece,<br><input type="checkbox"/> Spain,<br><input type="checkbox"/> France,<br><input type="checkbox"/> Italy,<br><input type="checkbox"/> Cyprus,<br><input type="checkbox"/> Malta,<br><input type="checkbox"/> Portugal |
|                                                                             | <input type="checkbox"/> Regional (specify)<br><input type="checkbox"/> Local (specify)                                                                                                                                                                                                                                                                                               |                                                                                                                                                                                                                                                                                                                                                                                                                                                                                                                              |                                                                                                                                                                                                                                                                                              |
| Factors                                                                     | <input checked="" type="checkbox"/> Multiple species/items (specify): several targets<br><input type="checkbox"/> Single species/item (specify)                                                                                                                                                                                                                                       |                                                                                                                                                                                                                                                                                                                                                                                                                                                                                                                              |                                                                                                                                                                                                                                                                                              |
| Crop                                                                        | <input checked="" type="checkbox"/> No specific crop(s)<br><input type="checkbox"/> Several crops (e.g. all cereals)<br><input type="checkbox"/> Single crop                                                                                                                                                                                                                          |                                                                                                                                                                                                                                                                                                                                                                                                                                                                                                                              |                                                                                                                                                                                                                                                                                              |
| Trait /treatment                                                            | <input checked="" type="checkbox"/> No specific traits/treatments<br><input type="checkbox"/> Several traits/treatments<br><input type="checkbox"/> Single trait/treatment                                                                                                                                                                                                            |                                                                                                                                                                                                                                                                                                                                                                                                                                                                                                                              |                                                                                                                                                                                                                                                                                              |
| GMO                                                                         | <input checked="" type="checkbox"/> No GMO bias                                                                                                                                                                                                                                                                                                                                       |                                                                                                                                                                                                                                                                                                                                                                                                                                                                                                                              |                                                                                                                                                                                                                                                                                              |



|                                                                                                                                   |                                                                                                                                                                                                                                                                        |
|-----------------------------------------------------------------------------------------------------------------------------------|------------------------------------------------------------------------------------------------------------------------------------------------------------------------------------------------------------------------------------------------------------------------|
|                                                                                                                                   | <input type="checkbox"/> GMO specific                                                                                                                                                                                                                                  |
| <b>METHODOLOGY</b>                                                                                                                |                                                                                                                                                                                                                                                                        |
| Observations                                                                                                                      | <input type="checkbox"/> Reported, verifiable methodology<br><input type="checkbox"/> Reported, unverifiable methodology<br><input type="checkbox"/> Unknown, unverifiable methodology                                                                                 |
| Frequency                                                                                                                         | <input type="checkbox"/> > 1 time/year<br><input type="checkbox"/> 1 time/year<br><input type="checkbox"/> < 1 time/year                                                                                                                                               |
| Future                                                                                                                            | <input type="checkbox"/> For $\geq 5$ years<br><input type="checkbox"/> between 1 and 5 years<br><input type="checkbox"/> no prospect                                                                                                                                  |
| Quality of performers                                                                                                             | <input checked="" type="checkbox"/> Trained, professionals<br><input type="checkbox"/> Trained, non-professionals – training by documentation, volunteers<br><input type="checkbox"/> Uncertain or not -specified                                                      |
| Quality of data                                                                                                                   | <input type="checkbox"/> Standard recording of raw data<br><input type="checkbox"/> Free recording of raw data<br><input type="checkbox"/> Anecdotic                                                                                                                   |
| Analysis                                                                                                                          | <input type="checkbox"/> Reported, verifiable methodology<br><input type="checkbox"/> Reported, unverifiable methodology<br><input type="checkbox"/> Unknown, unverifiable methodology                                                                                 |
| Quality of analysis                                                                                                               | <input type="checkbox"/> Scientifically based<br><input type="checkbox"/> Indicative only<br><input type="checkbox"/> Unknown                                                                                                                                          |
| <b>REPORTING</b>                                                                                                                  |                                                                                                                                                                                                                                                                        |
| Language                                                                                                                          | Reporting language(s): Romanian/English                                                                                                                                                                                                                                |
| Availability                                                                                                                      | <input type="checkbox"/> Scientific publication<br><input checked="" type="checkbox"/> Official report available on the internet or in other public forum<br><input type="checkbox"/> Official report available from network<br><input type="checkbox"/> Not available |
| Frequency                                                                                                                         | <input checked="" type="checkbox"/> $\geq 1$ time/year<br><input type="checkbox"/> < 1 time/year                                                                                                                                                                       |
| Historical reference                                                                                                              | <input type="checkbox"/> over $\geq 5$ years<br><input checked="" type="checkbox"/> between 1 and 5 years<br><input type="checkbox"/> no historical analysis                                                                                                           |
| <b>COMMENT(S)</b>                                                                                                                 |                                                                                                                                                                                                                                                                        |
| Official reporting on the state of the environment. Yearly report on the state of the environment, including cultivation of GMOs. |                                                                                                                                                                                                                                                                        |

## GSEN-09-0063.00.2 RO – NCSD

| EuropaBio's coordinated approach to General Surveillance: Existing Networks |                                                                                                                                                                                                                                                                                                                                                                                       |                                                                                                                                                                                                                                                                                                                                                                                                                                                                                                                              |                                                                                                                                                                                                                                                                                              |
|-----------------------------------------------------------------------------|---------------------------------------------------------------------------------------------------------------------------------------------------------------------------------------------------------------------------------------------------------------------------------------------------------------------------------------------------------------------------------------|------------------------------------------------------------------------------------------------------------------------------------------------------------------------------------------------------------------------------------------------------------------------------------------------------------------------------------------------------------------------------------------------------------------------------------------------------------------------------------------------------------------------------|----------------------------------------------------------------------------------------------------------------------------------------------------------------------------------------------------------------------------------------------------------------------------------------------|
| <b>ORGANISATION</b>                                                         |                                                                                                                                                                                                                                                                                                                                                                                       |                                                                                                                                                                                                                                                                                                                                                                                                                                                                                                                              |                                                                                                                                                                                                                                                                                              |
| EuropaBio reference                                                         | GS-EN-09-0063                                                                                                                                                                                                                                                                                                                                                                         |                                                                                                                                                                                                                                                                                                                                                                                                                                                                                                                              |                                                                                                                                                                                                                                                                                              |
| Official name of the Network                                                | <b>Centrul National pentru Dezvoltare Durabila (CNDD)</b>                                                                                                                                                                                                                                                                                                                             |                                                                                                                                                                                                                                                                                                                                                                                                                                                                                                                              |                                                                                                                                                                                                                                                                                              |
| Other names                                                                 | National Centre for Sustainable Development (NCSD)                                                                                                                                                                                                                                                                                                                                    |                                                                                                                                                                                                                                                                                                                                                                                                                                                                                                                              |                                                                                                                                                                                                                                                                                              |
| Type of organisation                                                        | Governmental<br>Founded 1997                                                                                                                                                                                                                                                                                                                                                          |                                                                                                                                                                                                                                                                                                                                                                                                                                                                                                                              |                                                                                                                                                                                                                                                                                              |
| Coordinates                                                                 | 16, Dr. Burghilea Str.<br>024032 Bucharest, district 2<br><br>Fax: + 40 (21) 3103321<br>Email: office[at]ncsd.ro                                                                                                                                                                                                                                                                      |                                                                                                                                                                                                                                                                                                                                                                                                                                                                                                                              |                                                                                                                                                                                                                                                                                              |
| Website                                                                     | <a href="http://www.ncsd.ro/index.html">http://www.ncsd.ro/index.html</a>                                                                                                                                                                                                                                                                                                             |                                                                                                                                                                                                                                                                                                                                                                                                                                                                                                                              |                                                                                                                                                                                                                                                                                              |
| Funding                                                                     | Government                                                                                                                                                                                                                                                                                                                                                                            |                                                                                                                                                                                                                                                                                                                                                                                                                                                                                                                              |                                                                                                                                                                                                                                                                                              |
| Conflict of interest                                                        | -                                                                                                                                                                                                                                                                                                                                                                                     |                                                                                                                                                                                                                                                                                                                                                                                                                                                                                                                              |                                                                                                                                                                                                                                                                                              |
| Part of other network(s)                                                    |                                                                                                                                                                                                                                                                                                                                                                                       |                                                                                                                                                                                                                                                                                                                                                                                                                                                                                                                              |                                                                                                                                                                                                                                                                                              |
| Grouping other network(s)                                                   |                                                                                                                                                                                                                                                                                                                                                                                       |                                                                                                                                                                                                                                                                                                                                                                                                                                                                                                                              |                                                                                                                                                                                                                                                                                              |
| <b>MONITORING SUBJECT</b>                                                   |                                                                                                                                                                                                                                                                                                                                                                                       |                                                                                                                                                                                                                                                                                                                                                                                                                                                                                                                              |                                                                                                                                                                                                                                                                                              |
| Description                                                                 | Promoting sustainable development                                                                                                                                                                                                                                                                                                                                                     |                                                                                                                                                                                                                                                                                                                                                                                                                                                                                                                              |                                                                                                                                                                                                                                                                                              |
| Protection goal(s) and/or influencing factor(s)                             | <input checked="" type="checkbox"/> Protection goal<br><input type="checkbox"/> Biodiversity / General<br><input type="checkbox"/> Human Health<br><input type="checkbox"/> Animal Health<br><input type="checkbox"/> Plant Health<br><input type="checkbox"/> Soil function<br><input type="checkbox"/> Water quality<br><input checked="" type="checkbox"/> Sustainable Agriculture | <input type="checkbox"/> Influencing factor<br><input type="checkbox"/> Agronomic practice<br><input type="checkbox"/> Plant protection<br><input type="checkbox"/> GMO cultivation<br><input type="checkbox"/> Environmental conditions                                                                                                                                                                                                                                                                                     |                                                                                                                                                                                                                                                                                              |
| Duplication of Farmer's questionnaire                                       | <input checked="" type="checkbox"/> No duplication<br><input type="checkbox"/> Partly duplication<br><input type="checkbox"/> Complete duplication                                                                                                                                                                                                                                    |                                                                                                                                                                                                                                                                                                                                                                                                                                                                                                                              |                                                                                                                                                                                                                                                                                              |
| <b>SPECIFICITY</b>                                                          |                                                                                                                                                                                                                                                                                                                                                                                       |                                                                                                                                                                                                                                                                                                                                                                                                                                                                                                                              |                                                                                                                                                                                                                                                                                              |
| Geography                                                                   | <input type="checkbox"/> EU -wide                                                                                                                                                                                                                                                                                                                                                     |                                                                                                                                                                                                                                                                                                                                                                                                                                                                                                                              |                                                                                                                                                                                                                                                                                              |
|                                                                             | <input type="checkbox"/> Zone A – North                                                                                                                                                                                                                                                                                                                                               | <input checked="" type="checkbox"/> Zone B – Centre:                                                                                                                                                                                                                                                                                                                                                                                                                                                                         | <input type="checkbox"/> Zone C – South                                                                                                                                                                                                                                                      |
|                                                                             | <input type="checkbox"/> Denmark,<br><input type="checkbox"/> Estonia,<br><input type="checkbox"/> Latvia,<br><input type="checkbox"/> Lithuania,<br><input type="checkbox"/> Finland,<br><input type="checkbox"/> Sweden                                                                                                                                                             | <input type="checkbox"/> Belgium,<br><input type="checkbox"/> Czech Republic<br><input type="checkbox"/> Germany,<br><input type="checkbox"/> Ireland,<br><input type="checkbox"/> Luxembourg,<br><input type="checkbox"/> Hungary,<br><input type="checkbox"/> Netherlands,<br><input type="checkbox"/> Austria,<br><input type="checkbox"/> Poland,<br><input checked="" type="checkbox"/> Romania,<br><input type="checkbox"/> Slovenia,<br><input type="checkbox"/> Slovakia,<br><input type="checkbox"/> United Kingdom | <input type="checkbox"/> Bulgaria,<br><input type="checkbox"/> Greece,<br><input type="checkbox"/> Spain,<br><input type="checkbox"/> France,<br><input type="checkbox"/> Italy,<br><input type="checkbox"/> Cyprus,<br><input type="checkbox"/> Malta,<br><input type="checkbox"/> Portugal |
|                                                                             | <input type="checkbox"/> Regional (specify)<br><input type="checkbox"/> Local (specify)                                                                                                                                                                                                                                                                                               |                                                                                                                                                                                                                                                                                                                                                                                                                                                                                                                              |                                                                                                                                                                                                                                                                                              |
| Factors                                                                     | <input checked="" type="checkbox"/> Multiple species/items (specify): several targets<br><input type="checkbox"/> Single species/item (specify)                                                                                                                                                                                                                                       |                                                                                                                                                                                                                                                                                                                                                                                                                                                                                                                              |                                                                                                                                                                                                                                                                                              |
| Crop                                                                        | <input checked="" type="checkbox"/> No specific crop(s)<br><input type="checkbox"/> Several crops (e.g. all cereals)<br><input type="checkbox"/> Single crop                                                                                                                                                                                                                          |                                                                                                                                                                                                                                                                                                                                                                                                                                                                                                                              |                                                                                                                                                                                                                                                                                              |
| Trait /treatment                                                            | <input checked="" type="checkbox"/> No specific traits/treatments<br><input type="checkbox"/> Several traits/treatments<br><input type="checkbox"/> Single trait/treatment                                                                                                                                                                                                            |                                                                                                                                                                                                                                                                                                                                                                                                                                                                                                                              |                                                                                                                                                                                                                                                                                              |
| GMO                                                                         | <input checked="" type="checkbox"/> No GMO bias<br><input type="checkbox"/> GMO specific                                                                                                                                                                                                                                                                                              |                                                                                                                                                                                                                                                                                                                                                                                                                                                                                                                              |                                                                                                                                                                                                                                                                                              |
| <b>METHODOLOGY</b>                                                          |                                                                                                                                                                                                                                                                                                                                                                                       |                                                                                                                                                                                                                                                                                                                                                                                                                                                                                                                              |                                                                                                                                                                                                                                                                                              |
| Observations                                                                | <input type="checkbox"/> Reported, verifiable methodology                                                                                                                                                                                                                                                                                                                             |                                                                                                                                                                                                                                                                                                                                                                                                                                                                                                                              |                                                                                                                                                                                                                                                                                              |

|                                                                                                         |                                                                                                                                                                                                                                                                        |
|---------------------------------------------------------------------------------------------------------|------------------------------------------------------------------------------------------------------------------------------------------------------------------------------------------------------------------------------------------------------------------------|
|                                                                                                         | <input type="checkbox"/> Reported, unverifiable methodology<br><input type="checkbox"/> Unknown, unverifiable methodology                                                                                                                                              |
| Frequency                                                                                               | <input type="checkbox"/> > 1 time/year<br><input type="checkbox"/> 1 time/year<br><input type="checkbox"/> < 1 time/year                                                                                                                                               |
| Future                                                                                                  | <input type="checkbox"/> For $\geq 5$ years<br><input type="checkbox"/> between 1 and 5 years<br><input type="checkbox"/> no prospect                                                                                                                                  |
| Quality of performers                                                                                   | <input checked="" type="checkbox"/> Trained, professionals<br><input type="checkbox"/> Trained, non-professionals – training by documentation, volunteers<br><input type="checkbox"/> Uncertain or not -specified                                                      |
| Quality of data                                                                                         | <input type="checkbox"/> Standard recording of raw data<br><input type="checkbox"/> Free recording of raw data<br><input type="checkbox"/> Anecdotic                                                                                                                   |
| Analysis                                                                                                | <input type="checkbox"/> Reported, verifiable methodology<br><input type="checkbox"/> Reported, unverifiable methodology<br><input type="checkbox"/> Unknown, unverifiable methodology                                                                                 |
| Quality of analysis                                                                                     | <input type="checkbox"/> Scientifically based<br><input type="checkbox"/> Indicative only<br><input type="checkbox"/> Unknown                                                                                                                                          |
| <b>REPORTING</b>                                                                                        |                                                                                                                                                                                                                                                                        |
| Language                                                                                                | Reporting language(s): Romanian/English                                                                                                                                                                                                                                |
| Availability                                                                                            | <input type="checkbox"/> Scientific publication<br><input checked="" type="checkbox"/> Official report available on the internet or in other public forum<br><input type="checkbox"/> Official report available from network<br><input type="checkbox"/> Not available |
| Frequency                                                                                               | <input type="checkbox"/> $\geq 1$ time/year<br><input type="checkbox"/> < 1 time/year                                                                                                                                                                                  |
| Historical reference                                                                                    | <input type="checkbox"/> over $\geq 5$ years<br><input type="checkbox"/> between 1 and 5 years<br><input type="checkbox"/> no historical analysis                                                                                                                      |
| <b>COMMENT(S)</b>                                                                                       |                                                                                                                                                                                                                                                                        |
| Network involved in promoting sustainable development. Documents/reports relate to projects and policy. |                                                                                                                                                                                                                                                                        |

## GSEN-09-0064.00.2 RO – ISP

| EuropaBio's coordinated approach to General Surveillance: Existing Networks |                                                                                                                                                                                                                                                                                                                                                                                       |                                                                                                                                                                                                                                                                                                                                                                                                                                                                                                                              |                                                                                                                                                                                                                                                                                              |
|-----------------------------------------------------------------------------|---------------------------------------------------------------------------------------------------------------------------------------------------------------------------------------------------------------------------------------------------------------------------------------------------------------------------------------------------------------------------------------|------------------------------------------------------------------------------------------------------------------------------------------------------------------------------------------------------------------------------------------------------------------------------------------------------------------------------------------------------------------------------------------------------------------------------------------------------------------------------------------------------------------------------|----------------------------------------------------------------------------------------------------------------------------------------------------------------------------------------------------------------------------------------------------------------------------------------------|
| <b>ORGANISATION</b>                                                         |                                                                                                                                                                                                                                                                                                                                                                                       |                                                                                                                                                                                                                                                                                                                                                                                                                                                                                                                              |                                                                                                                                                                                                                                                                                              |
| EuropaBio reference                                                         | GS-EN-09-0064                                                                                                                                                                                                                                                                                                                                                                         |                                                                                                                                                                                                                                                                                                                                                                                                                                                                                                                              |                                                                                                                                                                                                                                                                                              |
| Official name of the Network                                                | <b>Ministerului Sanatatii<br/>Institutul de Sanatate Publica Bucuresti</b>                                                                                                                                                                                                                                                                                                            |                                                                                                                                                                                                                                                                                                                                                                                                                                                                                                                              |                                                                                                                                                                                                                                                                                              |
| Other names                                                                 | Ministry of Health: Public Health Institute Bucharest; INSP                                                                                                                                                                                                                                                                                                                           |                                                                                                                                                                                                                                                                                                                                                                                                                                                                                                                              |                                                                                                                                                                                                                                                                                              |
| Type of organisation                                                        | Governmental<br>Founded 1927                                                                                                                                                                                                                                                                                                                                                          |                                                                                                                                                                                                                                                                                                                                                                                                                                                                                                                              |                                                                                                                                                                                                                                                                                              |
| Coordinates                                                                 | Str. Dr. Leonte nr. 1-3, Sector 5,<br>050463 Bucharest<br><br>Fax: +40 21 312 34 26,<br>Email: directie[at]ispb.ro                                                                                                                                                                                                                                                                    |                                                                                                                                                                                                                                                                                                                                                                                                                                                                                                                              |                                                                                                                                                                                                                                                                                              |
| Website                                                                     | <a href="http://www.ms.ro">http://www.ms.ro</a><br><a href="http://www.insp.gov.ro/">http://www.insp.gov.ro/</a>                                                                                                                                                                                                                                                                      |                                                                                                                                                                                                                                                                                                                                                                                                                                                                                                                              |                                                                                                                                                                                                                                                                                              |
| Funding                                                                     | Government                                                                                                                                                                                                                                                                                                                                                                            |                                                                                                                                                                                                                                                                                                                                                                                                                                                                                                                              |                                                                                                                                                                                                                                                                                              |
| Conflict of interest                                                        | -                                                                                                                                                                                                                                                                                                                                                                                     |                                                                                                                                                                                                                                                                                                                                                                                                                                                                                                                              |                                                                                                                                                                                                                                                                                              |
| Part of other network(s)                                                    |                                                                                                                                                                                                                                                                                                                                                                                       |                                                                                                                                                                                                                                                                                                                                                                                                                                                                                                                              |                                                                                                                                                                                                                                                                                              |
| Grouping other network(s)                                                   |                                                                                                                                                                                                                                                                                                                                                                                       |                                                                                                                                                                                                                                                                                                                                                                                                                                                                                                                              |                                                                                                                                                                                                                                                                                              |
| <b>MONITORING SUBJECT</b>                                                   |                                                                                                                                                                                                                                                                                                                                                                                       |                                                                                                                                                                                                                                                                                                                                                                                                                                                                                                                              |                                                                                                                                                                                                                                                                                              |
| Description                                                                 | Promoting sustainable development                                                                                                                                                                                                                                                                                                                                                     |                                                                                                                                                                                                                                                                                                                                                                                                                                                                                                                              |                                                                                                                                                                                                                                                                                              |
| Protection goal(s) and/or influencing factor(s)                             | <input checked="" type="checkbox"/> Protection goal<br><input type="checkbox"/> Biodiversity / General<br><input checked="" type="checkbox"/> Human Health<br><input type="checkbox"/> Animal Health<br><input type="checkbox"/> Plant Health<br><input type="checkbox"/> Soil function<br><input type="checkbox"/> Water quality<br><input type="checkbox"/> Sustainable Agriculture | <input type="checkbox"/> Influencing factor<br><input type="checkbox"/> Agronomic practice<br><input type="checkbox"/> Plant protection<br><input type="checkbox"/> GMO cultivation<br><input type="checkbox"/> Environmental conditions                                                                                                                                                                                                                                                                                     |                                                                                                                                                                                                                                                                                              |
| Duplication of Farmer's questionnaire                                       | <input checked="" type="checkbox"/> No duplication<br><input type="checkbox"/> Partly duplication<br><input type="checkbox"/> Complete duplication                                                                                                                                                                                                                                    |                                                                                                                                                                                                                                                                                                                                                                                                                                                                                                                              |                                                                                                                                                                                                                                                                                              |
| <b>SPECIFICITY</b>                                                          |                                                                                                                                                                                                                                                                                                                                                                                       |                                                                                                                                                                                                                                                                                                                                                                                                                                                                                                                              |                                                                                                                                                                                                                                                                                              |
| Geography                                                                   | <input type="checkbox"/> EU -wide                                                                                                                                                                                                                                                                                                                                                     |                                                                                                                                                                                                                                                                                                                                                                                                                                                                                                                              |                                                                                                                                                                                                                                                                                              |
|                                                                             | <input type="checkbox"/> Zone A – North                                                                                                                                                                                                                                                                                                                                               | <input checked="" type="checkbox"/> Zone B – Centre:                                                                                                                                                                                                                                                                                                                                                                                                                                                                         | <input type="checkbox"/> Zone C – South                                                                                                                                                                                                                                                      |
|                                                                             | <input type="checkbox"/> Denmark,<br><input type="checkbox"/> Estonia,<br><input type="checkbox"/> Latvia,<br><input type="checkbox"/> Lithuania,<br><input type="checkbox"/> Finland,<br><input type="checkbox"/> Sweden                                                                                                                                                             | <input type="checkbox"/> Belgium,<br><input type="checkbox"/> Czech Republic<br><input type="checkbox"/> Germany,<br><input type="checkbox"/> Ireland,<br><input type="checkbox"/> Luxembourg,<br><input type="checkbox"/> Hungary,<br><input type="checkbox"/> Netherlands,<br><input type="checkbox"/> Austria,<br><input type="checkbox"/> Poland,<br><input checked="" type="checkbox"/> Romania,<br><input type="checkbox"/> Slovenia,<br><input type="checkbox"/> Slovakia,<br><input type="checkbox"/> United Kingdom | <input type="checkbox"/> Bulgaria,<br><input type="checkbox"/> Greece,<br><input type="checkbox"/> Spain,<br><input type="checkbox"/> France,<br><input type="checkbox"/> Italy,<br><input type="checkbox"/> Cyprus,<br><input type="checkbox"/> Malta,<br><input type="checkbox"/> Portugal |
|                                                                             | <input type="checkbox"/> Regional (specify)<br><input type="checkbox"/> Local (specify)                                                                                                                                                                                                                                                                                               |                                                                                                                                                                                                                                                                                                                                                                                                                                                                                                                              |                                                                                                                                                                                                                                                                                              |
| Factors                                                                     | <input checked="" type="checkbox"/> Multiple species/items (specify): several health items<br><input type="checkbox"/> Single species/item (specify)                                                                                                                                                                                                                                  |                                                                                                                                                                                                                                                                                                                                                                                                                                                                                                                              |                                                                                                                                                                                                                                                                                              |
| Crop                                                                        | <input checked="" type="checkbox"/> No specific crop(s)<br><input type="checkbox"/> Several crops (e.g. all cereals)<br><input type="checkbox"/> Single crop                                                                                                                                                                                                                          |                                                                                                                                                                                                                                                                                                                                                                                                                                                                                                                              |                                                                                                                                                                                                                                                                                              |
| Trait /treatment                                                            | <input checked="" type="checkbox"/> No specific traits/treatments<br><input type="checkbox"/> Several traits/treatments<br><input type="checkbox"/> Single trait/treatment                                                                                                                                                                                                            |                                                                                                                                                                                                                                                                                                                                                                                                                                                                                                                              |                                                                                                                                                                                                                                                                                              |
| GMO                                                                         | <input checked="" type="checkbox"/> No GMO bias<br><input type="checkbox"/> GMO specific                                                                                                                                                                                                                                                                                              |                                                                                                                                                                                                                                                                                                                                                                                                                                                                                                                              |                                                                                                                                                                                                                                                                                              |

| <b>METHODOLOGY</b>                                     |                                                                                                                                                                                                                                                                        |
|--------------------------------------------------------|------------------------------------------------------------------------------------------------------------------------------------------------------------------------------------------------------------------------------------------------------------------------|
| Observations                                           | <input type="checkbox"/> Reported, verifiable methodology<br><input type="checkbox"/> Reported, unverifiable methodology<br><input type="checkbox"/> Unknown, unverifiable methodology                                                                                 |
| Frequency                                              | <input type="checkbox"/> > 1 time/year<br><input type="checkbox"/> 1 time/year<br><input type="checkbox"/> < 1 time/year                                                                                                                                               |
| Future                                                 | <input type="checkbox"/> For $\geq 5$ years<br><input type="checkbox"/> between 1 and 5 years<br><input type="checkbox"/> no prospect                                                                                                                                  |
| Quality of performers                                  | <input checked="" type="checkbox"/> Trained, professionals<br><input type="checkbox"/> Trained, non-professionals – training by documentation, volunteers<br><input type="checkbox"/> Uncertain or not -specified                                                      |
| Quality of data                                        | <input type="checkbox"/> Standard recording of raw data<br><input type="checkbox"/> Free recording of raw data<br><input type="checkbox"/> Anecdotic                                                                                                                   |
| Analysis                                               | <input type="checkbox"/> Reported, verifiable methodology<br><input type="checkbox"/> Reported, unverifiable methodology<br><input type="checkbox"/> Unknown, unverifiable methodology                                                                                 |
| Quality of analysis                                    | <input type="checkbox"/> Scientifically based<br><input type="checkbox"/> Indicative only<br><input type="checkbox"/> Unknown                                                                                                                                          |
| <b>REPORTING</b>                                       |                                                                                                                                                                                                                                                                        |
| Language                                               | Reporting language(s): Romanian/English                                                                                                                                                                                                                                |
| Availability                                           | <input type="checkbox"/> Scientific publication<br><input checked="" type="checkbox"/> Official report available on the internet or in other public forum<br><input type="checkbox"/> Official report available from network<br><input type="checkbox"/> Not available |
| Frequency                                              | <input type="checkbox"/> $\geq 1$ time/year<br><input type="checkbox"/> < 1 time/year                                                                                                                                                                                  |
| Historical reference                                   | <input type="checkbox"/> over $\geq 5$ years<br><input type="checkbox"/> between 1 and 5 years<br><input type="checkbox"/> no historical analysis                                                                                                                      |
| <b>COMMENT(S)</b>                                      |                                                                                                                                                                                                                                                                        |
| Network involved in monitoring health and food safety. |                                                                                                                                                                                                                                                                        |

## GSEN-09-0065.00.1 RO – Ministry of Agriculture

| EuropaBio's coordinated approach to General Surveillance: Existing Networks |                                                                                                                                                                                                                                                                                                                                                                                                    |                                                                                                                                                                                                                                                                                                                                                                                                                                                                                                                              |                                                                                                                                                                                                                                                                                              |
|-----------------------------------------------------------------------------|----------------------------------------------------------------------------------------------------------------------------------------------------------------------------------------------------------------------------------------------------------------------------------------------------------------------------------------------------------------------------------------------------|------------------------------------------------------------------------------------------------------------------------------------------------------------------------------------------------------------------------------------------------------------------------------------------------------------------------------------------------------------------------------------------------------------------------------------------------------------------------------------------------------------------------------|----------------------------------------------------------------------------------------------------------------------------------------------------------------------------------------------------------------------------------------------------------------------------------------------|
| ORGANISATION                                                                |                                                                                                                                                                                                                                                                                                                                                                                                    |                                                                                                                                                                                                                                                                                                                                                                                                                                                                                                                              |                                                                                                                                                                                                                                                                                              |
| EuropaBio reference                                                         | GS-EN-09-0065                                                                                                                                                                                                                                                                                                                                                                                      |                                                                                                                                                                                                                                                                                                                                                                                                                                                                                                                              |                                                                                                                                                                                                                                                                                              |
| Official name of the Network                                                | <b>Ministerul Agriculturii, Pădurilor și Dezvoltării Rurale</b><br><b>Inspekția de Stat pentru Controlul Organismelor Modificate Genetic (ISCOMG)</b>                                                                                                                                                                                                                                              |                                                                                                                                                                                                                                                                                                                                                                                                                                                                                                                              |                                                                                                                                                                                                                                                                                              |
| Other names                                                                 | Ministry of Agriculture, Forestry and Rural Development: GMO register;<br>State Inspection for Control of Genetically Modified Organisms                                                                                                                                                                                                                                                           |                                                                                                                                                                                                                                                                                                                                                                                                                                                                                                                              |                                                                                                                                                                                                                                                                                              |
| Type of organisation                                                        | Governmental<br>Founded 2006                                                                                                                                                                                                                                                                                                                                                                       |                                                                                                                                                                                                                                                                                                                                                                                                                                                                                                                              |                                                                                                                                                                                                                                                                                              |
| Coordinates                                                                 | B-dul Carol I, nr. 24, sector 3,<br>oficiul postal 37<br>020921 Bucharest<br><br>Fax: 004-021-307-85-54<br>Email: relatii.publice[at]adr.ro<br><br>INSPECȚIA DE STAT PENTRU CONTROLUL TEHNIC AL ORGANISMELOR MODIFICATE<br>GENETIC ( I. S. C. T. O.M.G.)<br>AUTORITATEA DE COORDONARE<br>Bulevardul Carol I, Nr. 24, sector 3<br>020921 Bucharest<br><br>Fax: 021-3078618<br>Email: omg[at]madr.ro |                                                                                                                                                                                                                                                                                                                                                                                                                                                                                                                              |                                                                                                                                                                                                                                                                                              |
| Website                                                                     | <a href="http://www.maap.ro/">http://www.maap.ro/</a><br><a href="http://www.madr.ro/ro/inspectia-in-domeniul-organismelor-modificate-genetic.html">http://www.madr.ro/ro/inspectia-in-domeniul-organismelor-modificate-genetic.html</a>                                                                                                                                                           |                                                                                                                                                                                                                                                                                                                                                                                                                                                                                                                              |                                                                                                                                                                                                                                                                                              |
| Funding                                                                     | Government                                                                                                                                                                                                                                                                                                                                                                                         |                                                                                                                                                                                                                                                                                                                                                                                                                                                                                                                              |                                                                                                                                                                                                                                                                                              |
| Conflict of interest                                                        | -                                                                                                                                                                                                                                                                                                                                                                                                  |                                                                                                                                                                                                                                                                                                                                                                                                                                                                                                                              |                                                                                                                                                                                                                                                                                              |
| Part of other network(s)                                                    |                                                                                                                                                                                                                                                                                                                                                                                                    |                                                                                                                                                                                                                                                                                                                                                                                                                                                                                                                              |                                                                                                                                                                                                                                                                                              |
| Grouping other network(s)                                                   |                                                                                                                                                                                                                                                                                                                                                                                                    |                                                                                                                                                                                                                                                                                                                                                                                                                                                                                                                              |                                                                                                                                                                                                                                                                                              |
| MONITORING SUBJECT                                                          |                                                                                                                                                                                                                                                                                                                                                                                                    |                                                                                                                                                                                                                                                                                                                                                                                                                                                                                                                              |                                                                                                                                                                                                                                                                                              |
| Description                                                                 | Monitors implementation and compliance with GMO legislation (GMO cultivation)<br>maintains database on all GM cultivation                                                                                                                                                                                                                                                                          |                                                                                                                                                                                                                                                                                                                                                                                                                                                                                                                              |                                                                                                                                                                                                                                                                                              |
| Protection goal(s) and/or influencing factor(s)                             | <input type="checkbox"/> Protection goal                                                                                                                                                                                                                                                                                                                                                           | <input checked="" type="checkbox"/> Influencing factor                                                                                                                                                                                                                                                                                                                                                                                                                                                                       |                                                                                                                                                                                                                                                                                              |
|                                                                             | <input type="checkbox"/> Biodiversity / General<br><input type="checkbox"/> Human Health<br><input type="checkbox"/> Animal Health<br><input type="checkbox"/> Plant Health<br><input type="checkbox"/> Soil function<br><input type="checkbox"/> Water quality<br><input type="checkbox"/> Sustainable Agriculture                                                                                | <input type="checkbox"/> Agronomic practice<br><input type="checkbox"/> Plant protection<br><input checked="" type="checkbox"/> GMO cultivation<br><input type="checkbox"/> Environmental conditions                                                                                                                                                                                                                                                                                                                         |                                                                                                                                                                                                                                                                                              |
| Duplication of Farmer's questionnaire                                       | <input checked="" type="checkbox"/> No duplication<br><input type="checkbox"/> Partly duplication<br><input type="checkbox"/> Complete duplication                                                                                                                                                                                                                                                 |                                                                                                                                                                                                                                                                                                                                                                                                                                                                                                                              |                                                                                                                                                                                                                                                                                              |
| SPECIFICITY                                                                 |                                                                                                                                                                                                                                                                                                                                                                                                    |                                                                                                                                                                                                                                                                                                                                                                                                                                                                                                                              |                                                                                                                                                                                                                                                                                              |
| Geography                                                                   | <input type="checkbox"/> EU -wide                                                                                                                                                                                                                                                                                                                                                                  |                                                                                                                                                                                                                                                                                                                                                                                                                                                                                                                              |                                                                                                                                                                                                                                                                                              |
|                                                                             | <input type="checkbox"/> Zone A – North                                                                                                                                                                                                                                                                                                                                                            | <input checked="" type="checkbox"/> Zone B – Centre:                                                                                                                                                                                                                                                                                                                                                                                                                                                                         | <input type="checkbox"/> Zone C – South                                                                                                                                                                                                                                                      |
|                                                                             | <input type="checkbox"/> Denmark,<br><input type="checkbox"/> Estonia,<br><input type="checkbox"/> Latvia,<br><input type="checkbox"/> Lithuania,<br><input type="checkbox"/> Finland,<br><input type="checkbox"/> Sweden                                                                                                                                                                          | <input type="checkbox"/> Belgium,<br><input type="checkbox"/> Czech Republic<br><input type="checkbox"/> Germany,<br><input type="checkbox"/> Ireland,<br><input type="checkbox"/> Luxembourg,<br><input type="checkbox"/> Hungary,<br><input type="checkbox"/> Netherlands,<br><input type="checkbox"/> Austria,<br><input type="checkbox"/> Poland,<br><input checked="" type="checkbox"/> Romania,<br><input type="checkbox"/> Slovenia,<br><input type="checkbox"/> Slovakia,<br><input type="checkbox"/> United Kingdom | <input type="checkbox"/> Bulgaria,<br><input type="checkbox"/> Greece,<br><input type="checkbox"/> Spain,<br><input type="checkbox"/> France,<br><input type="checkbox"/> Italy,<br><input type="checkbox"/> Cyprus,<br><input type="checkbox"/> Malta,<br><input type="checkbox"/> Portugal |
|                                                                             | <input type="checkbox"/> Regional (specify)<br><input type="checkbox"/> Local (specify)                                                                                                                                                                                                                                                                                                            |                                                                                                                                                                                                                                                                                                                                                                                                                                                                                                                              |                                                                                                                                                                                                                                                                                              |
| Factors                                                                     | <input checked="" type="checkbox"/> Multiple species/items (specify): GMO crops                                                                                                                                                                                                                                                                                                                    |                                                                                                                                                                                                                                                                                                                                                                                                                                                                                                                              |                                                                                                                                                                                                                                                                                              |

|                                          |                                                                                                                                                                                                                                                             |
|------------------------------------------|-------------------------------------------------------------------------------------------------------------------------------------------------------------------------------------------------------------------------------------------------------------|
|                                          | <input type="checkbox"/> Single species/item (specify)                                                                                                                                                                                                      |
| Crop                                     | <input type="checkbox"/> No specific crop(s)<br><input type="checkbox"/> Several crops (e.g. all cereals): GMO crops<br><input type="checkbox"/> Single crop:                                                                                               |
| Trait /treatment                         | <input checked="" type="checkbox"/> No specific traits/treatments<br><input type="checkbox"/> Several traits/treatments<br><input type="checkbox"/> Single trait/treatment                                                                                  |
| GMO                                      | <input type="checkbox"/> No GMO bias<br><input checked="" type="checkbox"/> GMO specific                                                                                                                                                                    |
| <b>METHODOLOGY</b>                       |                                                                                                                                                                                                                                                             |
| Observations                             | <input type="checkbox"/> Reported, verifiable methodology<br><input type="checkbox"/> Reported, unverifiable methodology<br><input type="checkbox"/> Unknown, unverifiable methodology                                                                      |
| Frequency                                | <input type="checkbox"/> > 1 time/year<br><input type="checkbox"/> 1 time/year<br><input type="checkbox"/> < 1 time/year                                                                                                                                    |
| Future                                   | <input type="checkbox"/> For ≥ 5 years<br><input type="checkbox"/> between 1 and 5 years<br><input type="checkbox"/> no prospect                                                                                                                            |
| Quality of performers                    | <input checked="" type="checkbox"/> Trained, professionals<br><input type="checkbox"/> Trained, non-professionals – training by documentation, volunteers<br><input type="checkbox"/> Uncertain or not -specified                                           |
| Quality of data                          | <input type="checkbox"/> Standard recording of raw data<br><input type="checkbox"/> Free recording of raw data<br><input type="checkbox"/> Anecdotic                                                                                                        |
| Analysis                                 | <input type="checkbox"/> Reported, verifiable methodology<br><input type="checkbox"/> Reported, unverifiable methodology<br><input type="checkbox"/> Unknown, unverifiable methodology                                                                      |
| Quality of analysis                      | <input type="checkbox"/> Scientifically based<br><input type="checkbox"/> Indicative only<br><input type="checkbox"/> Unknown                                                                                                                               |
| <b>REPORTING</b>                         |                                                                                                                                                                                                                                                             |
| Language                                 | Reporting language(s):                                                                                                                                                                                                                                      |
| Availability                             | <input type="checkbox"/> Scientific publication<br><input type="checkbox"/> Official report available on the internet or in other public forum<br><input type="checkbox"/> Official report available from network<br><input type="checkbox"/> Not available |
| Frequency                                | <input type="checkbox"/> ≥ 1 time/year<br><input type="checkbox"/> < 1 time/year                                                                                                                                                                            |
| Historical reference                     | <input type="checkbox"/> over ≥ 5 years<br><input type="checkbox"/> between 1 and 5 years<br><input type="checkbox"/> no historical analysis                                                                                                                |
| <b>COMMENT(S)</b>                        |                                                                                                                                                                                                                                                             |
| Database is not available on the website |                                                                                                                                                                                                                                                             |

## GSEN-09-0071.00.2 RO – ANSVSA

| EuropaBio's coordinated approach to General Surveillance: Existing Networks |                                                                                                                                                                                                                                                                                                                                |                                                                                                                                                                                                                                                                                                                                                                                                                                                                                                                              |                                                                                                                                                                                                                                                                                              |
|-----------------------------------------------------------------------------|--------------------------------------------------------------------------------------------------------------------------------------------------------------------------------------------------------------------------------------------------------------------------------------------------------------------------------|------------------------------------------------------------------------------------------------------------------------------------------------------------------------------------------------------------------------------------------------------------------------------------------------------------------------------------------------------------------------------------------------------------------------------------------------------------------------------------------------------------------------------|----------------------------------------------------------------------------------------------------------------------------------------------------------------------------------------------------------------------------------------------------------------------------------------------|
| <b>ORGANISATION</b>                                                         |                                                                                                                                                                                                                                                                                                                                |                                                                                                                                                                                                                                                                                                                                                                                                                                                                                                                              |                                                                                                                                                                                                                                                                                              |
| EuropaBio reference                                                         | GS-EN-09-0071                                                                                                                                                                                                                                                                                                                  |                                                                                                                                                                                                                                                                                                                                                                                                                                                                                                                              |                                                                                                                                                                                                                                                                                              |
| Official name of the Network                                                | <b>Autorităţii Naţionale Sanitare Veterinare Şi Pentru Siguranţa Alimentelor</b>                                                                                                                                                                                                                                               |                                                                                                                                                                                                                                                                                                                                                                                                                                                                                                                              |                                                                                                                                                                                                                                                                                              |
| Other names                                                                 | National Sanitary Veterinary and Food Safety Authority (ANSVSA)                                                                                                                                                                                                                                                                |                                                                                                                                                                                                                                                                                                                                                                                                                                                                                                                              |                                                                                                                                                                                                                                                                                              |
| Type of organisation                                                        | Governmental<br>Founded (unknown)                                                                                                                                                                                                                                                                                              |                                                                                                                                                                                                                                                                                                                                                                                                                                                                                                                              |                                                                                                                                                                                                                                                                                              |
| Coordinates                                                                 | Str. Merchants no. 1B, Sector 2,<br>023951 Bucharest<br><br>Fax : 021-3124967<br>Email: office[at]ansvsa.ro                                                                                                                                                                                                                    |                                                                                                                                                                                                                                                                                                                                                                                                                                                                                                                              |                                                                                                                                                                                                                                                                                              |
| Website                                                                     | <a href="http://www.ansvsa.ro">http://www.ansvsa.ro</a>                                                                                                                                                                                                                                                                        |                                                                                                                                                                                                                                                                                                                                                                                                                                                                                                                              |                                                                                                                                                                                                                                                                                              |
| Funding                                                                     | Government                                                                                                                                                                                                                                                                                                                     |                                                                                                                                                                                                                                                                                                                                                                                                                                                                                                                              |                                                                                                                                                                                                                                                                                              |
| Conflict of interest                                                        | -                                                                                                                                                                                                                                                                                                                              |                                                                                                                                                                                                                                                                                                                                                                                                                                                                                                                              |                                                                                                                                                                                                                                                                                              |
| Part of other network(s)                                                    |                                                                                                                                                                                                                                                                                                                                |                                                                                                                                                                                                                                                                                                                                                                                                                                                                                                                              |                                                                                                                                                                                                                                                                                              |
| Grouping other network(s)                                                   |                                                                                                                                                                                                                                                                                                                                |                                                                                                                                                                                                                                                                                                                                                                                                                                                                                                                              |                                                                                                                                                                                                                                                                                              |
| <b>MONITORING SUBJECT</b>                                                   |                                                                                                                                                                                                                                                                                                                                |                                                                                                                                                                                                                                                                                                                                                                                                                                                                                                                              |                                                                                                                                                                                                                                                                                              |
| Description                                                                 | Animal health and food safety, includes evaluation of pesticides                                                                                                                                                                                                                                                               |                                                                                                                                                                                                                                                                                                                                                                                                                                                                                                                              |                                                                                                                                                                                                                                                                                              |
| Protection goal(s) and/or influencing factor(s)                             | <input checked="" type="checkbox"/> Protection goal                                                                                                                                                                                                                                                                            | <input type="checkbox"/> Influencing factor                                                                                                                                                                                                                                                                                                                                                                                                                                                                                  |                                                                                                                                                                                                                                                                                              |
|                                                                             | <input type="checkbox"/> Biodiversity / General<br><input type="checkbox"/> Human Health<br><input checked="" type="checkbox"/> Animal Health<br><input type="checkbox"/> Plant Health<br><input type="checkbox"/> Soil function<br><input type="checkbox"/> Water quality<br><input type="checkbox"/> Sustainable Agriculture | <input checked="" type="checkbox"/> Agronomic practice<br><input checked="" type="checkbox"/> Plant protection<br><input type="checkbox"/> GMO cultivation<br><input type="checkbox"/> Environmental conditions                                                                                                                                                                                                                                                                                                              |                                                                                                                                                                                                                                                                                              |
| Duplication of Farmer's questionnaire                                       | <input type="checkbox"/> No duplication<br><input checked="" type="checkbox"/> Partly duplication<br><input type="checkbox"/> Complete duplication                                                                                                                                                                             |                                                                                                                                                                                                                                                                                                                                                                                                                                                                                                                              |                                                                                                                                                                                                                                                                                              |
| <b>SPECIFICITY</b>                                                          |                                                                                                                                                                                                                                                                                                                                |                                                                                                                                                                                                                                                                                                                                                                                                                                                                                                                              |                                                                                                                                                                                                                                                                                              |
| Geography                                                                   | <input type="checkbox"/> EU -wide                                                                                                                                                                                                                                                                                              |                                                                                                                                                                                                                                                                                                                                                                                                                                                                                                                              |                                                                                                                                                                                                                                                                                              |
|                                                                             | <input type="checkbox"/> Zone A – North                                                                                                                                                                                                                                                                                        | <input checked="" type="checkbox"/> Zone B – Centre:                                                                                                                                                                                                                                                                                                                                                                                                                                                                         | <input type="checkbox"/> Zone C – South                                                                                                                                                                                                                                                      |
|                                                                             | <input type="checkbox"/> Denmark,<br><input type="checkbox"/> Estonia,<br><input type="checkbox"/> Latvia,<br><input type="checkbox"/> Lithuania,<br><input type="checkbox"/> Finland,<br><input type="checkbox"/> Sweden                                                                                                      | <input type="checkbox"/> Belgium,<br><input type="checkbox"/> Czech Republic<br><input type="checkbox"/> Germany,<br><input type="checkbox"/> Ireland,<br><input type="checkbox"/> Luxembourg,<br><input type="checkbox"/> Hungary,<br><input type="checkbox"/> Netherlands,<br><input type="checkbox"/> Austria,<br><input type="checkbox"/> Poland,<br><input checked="" type="checkbox"/> Romania,<br><input type="checkbox"/> Slovenia,<br><input type="checkbox"/> Slovakia,<br><input type="checkbox"/> United Kingdom | <input type="checkbox"/> Bulgaria,<br><input type="checkbox"/> Greece,<br><input type="checkbox"/> Spain,<br><input type="checkbox"/> France,<br><input type="checkbox"/> Italy,<br><input type="checkbox"/> Cyprus,<br><input type="checkbox"/> Malta,<br><input type="checkbox"/> Portugal |
|                                                                             | <input type="checkbox"/> Regional (specify)<br><input type="checkbox"/> Local (specify)                                                                                                                                                                                                                                        |                                                                                                                                                                                                                                                                                                                                                                                                                                                                                                                              |                                                                                                                                                                                                                                                                                              |
| Factors                                                                     | <input checked="" type="checkbox"/> Multiple species/items (specify): several health items<br><input type="checkbox"/> Single species/item (specify)                                                                                                                                                                           |                                                                                                                                                                                                                                                                                                                                                                                                                                                                                                                              |                                                                                                                                                                                                                                                                                              |
| Crop                                                                        | <input checked="" type="checkbox"/> No specific crop(s)<br><input type="checkbox"/> Several crops (e.g. all cereals)<br><input type="checkbox"/> Single crop                                                                                                                                                                   |                                                                                                                                                                                                                                                                                                                                                                                                                                                                                                                              |                                                                                                                                                                                                                                                                                              |
| Trait /treatment                                                            | <input checked="" type="checkbox"/> No specific traits/treatments<br><input type="checkbox"/> Several traits/treatments<br><input type="checkbox"/> Single trait/treatment                                                                                                                                                     |                                                                                                                                                                                                                                                                                                                                                                                                                                                                                                                              |                                                                                                                                                                                                                                                                                              |
| GMO                                                                         | <input checked="" type="checkbox"/> No GMO bias<br><input type="checkbox"/> GMO specific                                                                                                                                                                                                                                       |                                                                                                                                                                                                                                                                                                                                                                                                                                                                                                                              |                                                                                                                                                                                                                                                                                              |
| <b>METHODOLOGY</b>                                                          |                                                                                                                                                                                                                                                                                                                                |                                                                                                                                                                                                                                                                                                                                                                                                                                                                                                                              |                                                                                                                                                                                                                                                                                              |



|                                                               |                                                                                                                                                                                                                                                                        |
|---------------------------------------------------------------|------------------------------------------------------------------------------------------------------------------------------------------------------------------------------------------------------------------------------------------------------------------------|
| Observations                                                  | <input type="checkbox"/> Reported, verifiable methodology<br><input type="checkbox"/> Reported, unverifiable methodology<br><input type="checkbox"/> Unknown, unverifiable methodology                                                                                 |
| Frequency                                                     | <input type="checkbox"/> > 1 time/year<br><input type="checkbox"/> 1 time/year<br><input type="checkbox"/> < 1 time/year                                                                                                                                               |
| Future                                                        | <input type="checkbox"/> For $\geq 5$ years<br><input type="checkbox"/> between 1 and 5 years<br><input type="checkbox"/> no prospect                                                                                                                                  |
| Quality of performers                                         | <input checked="" type="checkbox"/> Trained, professionals<br><input type="checkbox"/> Trained, non-professionals – training by documentation, volunteers<br><input type="checkbox"/> Uncertain or not -specified                                                      |
| Quality of data                                               | <input type="checkbox"/> Standard recording of raw data<br><input type="checkbox"/> Free recording of raw data<br><input type="checkbox"/> Anecdotic                                                                                                                   |
| Analysis                                                      | <input type="checkbox"/> Reported, verifiable methodology<br><input type="checkbox"/> Reported, unverifiable methodology<br><input type="checkbox"/> Unknown, unverifiable methodology                                                                                 |
| Quality of analysis                                           | <input type="checkbox"/> Scientifically based<br><input type="checkbox"/> Indicative only<br><input type="checkbox"/> Unknown                                                                                                                                          |
| <b>REPORTING</b>                                              |                                                                                                                                                                                                                                                                        |
| Language                                                      | Reporting language(s): Romanian                                                                                                                                                                                                                                        |
| Availability                                                  | <input type="checkbox"/> Scientific publication<br><input checked="" type="checkbox"/> Official report available on the internet or in other public forum<br><input type="checkbox"/> Official report available from network<br><input type="checkbox"/> Not available |
| Frequency                                                     | <input type="checkbox"/> $\geq 1$ time/year<br><input type="checkbox"/> < 1 time/year                                                                                                                                                                                  |
| Historical reference                                          | <input type="checkbox"/> over $\geq 5$ years<br><input type="checkbox"/> between 1 and 5 years<br><input type="checkbox"/> no historical analysis                                                                                                                      |
| <b>COMMENT(S)</b>                                             |                                                                                                                                                                                                                                                                        |
| Network involved in monitoring animal health and food safety. |                                                                                                                                                                                                                                                                        |

## GSEN-09-0072.00.2 RO – Natura 2000

| EuropaBio's coordinated approach to General Surveillance: Existing Networks |                                                                                                                                                                                                                                                                                                                                                                                           |                                                                                                                                                                                                                                                                                                                                                                                                                                                                                                                              |                                                                                                                                                                                                                                                                                              |
|-----------------------------------------------------------------------------|-------------------------------------------------------------------------------------------------------------------------------------------------------------------------------------------------------------------------------------------------------------------------------------------------------------------------------------------------------------------------------------------|------------------------------------------------------------------------------------------------------------------------------------------------------------------------------------------------------------------------------------------------------------------------------------------------------------------------------------------------------------------------------------------------------------------------------------------------------------------------------------------------------------------------------|----------------------------------------------------------------------------------------------------------------------------------------------------------------------------------------------------------------------------------------------------------------------------------------------|
| ORGANISATION                                                                |                                                                                                                                                                                                                                                                                                                                                                                           |                                                                                                                                                                                                                                                                                                                                                                                                                                                                                                                              |                                                                                                                                                                                                                                                                                              |
| EuropaBio reference                                                         | GS-EN-09-0072                                                                                                                                                                                                                                                                                                                                                                             |                                                                                                                                                                                                                                                                                                                                                                                                                                                                                                                              |                                                                                                                                                                                                                                                                                              |
| Official name of the Network                                                | Coalitia ONG Natura2000 Romania                                                                                                                                                                                                                                                                                                                                                           |                                                                                                                                                                                                                                                                                                                                                                                                                                                                                                                              |                                                                                                                                                                                                                                                                                              |
| Other names                                                                 | Natura 2000 NGO coalition Romania                                                                                                                                                                                                                                                                                                                                                         |                                                                                                                                                                                                                                                                                                                                                                                                                                                                                                                              |                                                                                                                                                                                                                                                                                              |
| Type of organisation                                                        | Nature conservation<br>Founded 2003                                                                                                                                                                                                                                                                                                                                                       |                                                                                                                                                                                                                                                                                                                                                                                                                                                                                                                              |                                                                                                                                                                                                                                                                                              |
| Coordinates                                                                 | WWF Programul Dunare-Carpati, Birou Brasov<br>Str. Lunga, nr.175,<br>500051 Brasov<br><br>Fax: +40 (0) 368462564<br>Email: coalitia.natura2000[at]gmail.com                                                                                                                                                                                                                               |                                                                                                                                                                                                                                                                                                                                                                                                                                                                                                                              |                                                                                                                                                                                                                                                                                              |
| Website                                                                     | <a href="http://www.natura2000.ro">www.natura2000.ro</a>                                                                                                                                                                                                                                                                                                                                  |                                                                                                                                                                                                                                                                                                                                                                                                                                                                                                                              |                                                                                                                                                                                                                                                                                              |
| Funding                                                                     | Contribution by all member organizations/ funding                                                                                                                                                                                                                                                                                                                                         |                                                                                                                                                                                                                                                                                                                                                                                                                                                                                                                              |                                                                                                                                                                                                                                                                                              |
| Conflict of interest                                                        | -                                                                                                                                                                                                                                                                                                                                                                                         |                                                                                                                                                                                                                                                                                                                                                                                                                                                                                                                              |                                                                                                                                                                                                                                                                                              |
| Part of other network(s)                                                    |                                                                                                                                                                                                                                                                                                                                                                                           |                                                                                                                                                                                                                                                                                                                                                                                                                                                                                                                              |                                                                                                                                                                                                                                                                                              |
| Grouping other network(s)                                                   | 51 members, Nature conservation networks in the field of nature protection                                                                                                                                                                                                                                                                                                                |                                                                                                                                                                                                                                                                                                                                                                                                                                                                                                                              |                                                                                                                                                                                                                                                                                              |
| MONITORING SUBJECT                                                          |                                                                                                                                                                                                                                                                                                                                                                                           |                                                                                                                                                                                                                                                                                                                                                                                                                                                                                                                              |                                                                                                                                                                                                                                                                                              |
| Description                                                                 | Coalition to achieve the objectives of Natura2000 in protection of Special Protection Areas and Special Conservation Areas.                                                                                                                                                                                                                                                               |                                                                                                                                                                                                                                                                                                                                                                                                                                                                                                                              |                                                                                                                                                                                                                                                                                              |
| Protection goal(s) and/or influencing factor(s)                             | <input checked="" type="checkbox"/> Protection goal<br><br><input checked="" type="checkbox"/> Biodiversity / General<br><input type="checkbox"/> Human Health<br><input type="checkbox"/> Animal Health<br><input type="checkbox"/> Plant Health<br><input type="checkbox"/> Soil function<br><input type="checkbox"/> Water quality<br><input type="checkbox"/> Sustainable Agriculture | <input type="checkbox"/> Influencing factor<br><br><input type="checkbox"/> Agronomic practice<br><input type="checkbox"/> Plant protection<br><input type="checkbox"/> GMO cultivation<br><input type="checkbox"/> Environmental conditions                                                                                                                                                                                                                                                                                 |                                                                                                                                                                                                                                                                                              |
| Duplication of Farmer's questionnaire                                       | <input checked="" type="checkbox"/> No duplication<br><input type="checkbox"/> Partly duplication<br><input type="checkbox"/> Complete duplication                                                                                                                                                                                                                                        |                                                                                                                                                                                                                                                                                                                                                                                                                                                                                                                              |                                                                                                                                                                                                                                                                                              |
| SPECIFICITY                                                                 |                                                                                                                                                                                                                                                                                                                                                                                           |                                                                                                                                                                                                                                                                                                                                                                                                                                                                                                                              |                                                                                                                                                                                                                                                                                              |
| Geography                                                                   | <input type="checkbox"/> EU -wide                                                                                                                                                                                                                                                                                                                                                         |                                                                                                                                                                                                                                                                                                                                                                                                                                                                                                                              |                                                                                                                                                                                                                                                                                              |
|                                                                             | <input type="checkbox"/> Zone A – North                                                                                                                                                                                                                                                                                                                                                   | <input checked="" type="checkbox"/> Zone B – Centre:                                                                                                                                                                                                                                                                                                                                                                                                                                                                         | <input type="checkbox"/> Zone C – South                                                                                                                                                                                                                                                      |
|                                                                             | <input type="checkbox"/> Denmark,<br><input type="checkbox"/> Estonia,<br><input type="checkbox"/> Latvia,<br><input type="checkbox"/> Lithuania,<br><input type="checkbox"/> Finland,<br><input type="checkbox"/> Sweden                                                                                                                                                                 | <input type="checkbox"/> Belgium,<br><input type="checkbox"/> Czech Republic<br><input type="checkbox"/> Germany,<br><input type="checkbox"/> Ireland,<br><input type="checkbox"/> Luxembourg,<br><input type="checkbox"/> Hungary,<br><input type="checkbox"/> Netherlands,<br><input type="checkbox"/> Austria,<br><input type="checkbox"/> Poland,<br><input checked="" type="checkbox"/> Romania,<br><input type="checkbox"/> Slovenia,<br><input type="checkbox"/> Slovakia,<br><input type="checkbox"/> United Kingdom | <input type="checkbox"/> Bulgaria,<br><input type="checkbox"/> Greece,<br><input type="checkbox"/> Spain,<br><input type="checkbox"/> France,<br><input type="checkbox"/> Italy,<br><input type="checkbox"/> Cyprus,<br><input type="checkbox"/> Malta,<br><input type="checkbox"/> Portugal |
|                                                                             | <input type="checkbox"/> Regional (specify)<br><input type="checkbox"/> Local (specify)                                                                                                                                                                                                                                                                                                   |                                                                                                                                                                                                                                                                                                                                                                                                                                                                                                                              |                                                                                                                                                                                                                                                                                              |
| Factors                                                                     | <input checked="" type="checkbox"/> Multiple species/items (specify): several species, biotopes and nature areas<br><input type="checkbox"/> Single species/item (specify)                                                                                                                                                                                                                |                                                                                                                                                                                                                                                                                                                                                                                                                                                                                                                              |                                                                                                                                                                                                                                                                                              |
| Crop                                                                        | <input checked="" type="checkbox"/> No specific crop(s)<br><input type="checkbox"/> Several crops (e.g. all cereals)<br><input type="checkbox"/> Single crop                                                                                                                                                                                                                              |                                                                                                                                                                                                                                                                                                                                                                                                                                                                                                                              |                                                                                                                                                                                                                                                                                              |
| Trait /treatment                                                            | <input checked="" type="checkbox"/> No specific traits/treatments<br><input type="checkbox"/> Several traits/treatments<br><input type="checkbox"/> Single trait/treatment                                                                                                                                                                                                                |                                                                                                                                                                                                                                                                                                                                                                                                                                                                                                                              |                                                                                                                                                                                                                                                                                              |
| GMO                                                                         | <input checked="" type="checkbox"/> No GMO bias<br><input type="checkbox"/> GMO specific                                                                                                                                                                                                                                                                                                  |                                                                                                                                                                                                                                                                                                                                                                                                                                                                                                                              |                                                                                                                                                                                                                                                                                              |
| METHODOLOGY                                                                 |                                                                                                                                                                                                                                                                                                                                                                                           |                                                                                                                                                                                                                                                                                                                                                                                                                                                                                                                              |                                                                                                                                                                                                                                                                                              |

|                                                                                                                                              |                                                                                                                                                                                                                                                             |
|----------------------------------------------------------------------------------------------------------------------------------------------|-------------------------------------------------------------------------------------------------------------------------------------------------------------------------------------------------------------------------------------------------------------|
| Observations                                                                                                                                 | <input type="checkbox"/> Reported, verifiable methodology<br><input type="checkbox"/> Reported, unverifiable methodology<br><input type="checkbox"/> Unknown, unverifiable methodology                                                                      |
| Frequency                                                                                                                                    | <input type="checkbox"/> > 1 time/year<br><input type="checkbox"/> 1 time/year<br><input type="checkbox"/> < 1 time/year                                                                                                                                    |
| Future                                                                                                                                       | <input type="checkbox"/> For $\geq 5$ years<br><input type="checkbox"/> between 1 and 5 years<br><input type="checkbox"/> no prospect                                                                                                                       |
| Quality of performers                                                                                                                        | <input type="checkbox"/> Trained, professionals<br><input type="checkbox"/> Trained, non-professionals – training by documentation, volunteers<br><input type="checkbox"/> Uncertain or not -specified                                                      |
| Quality of data                                                                                                                              | <input type="checkbox"/> Standard recording of raw data<br><input type="checkbox"/> Free recording of raw data<br><input type="checkbox"/> Anecdotic                                                                                                        |
| Analysis                                                                                                                                     | <input type="checkbox"/> Reported, verifiable methodology<br><input type="checkbox"/> Reported, unverifiable methodology<br><input type="checkbox"/> Unknown, unverifiable methodology                                                                      |
| Quality of analysis                                                                                                                          | <input type="checkbox"/> Scientifically based<br><input type="checkbox"/> Indicative only<br><input type="checkbox"/> Unknown                                                                                                                               |
| <b>REPORTING</b>                                                                                                                             |                                                                                                                                                                                                                                                             |
| Language                                                                                                                                     | Reporting language(s): Romanian                                                                                                                                                                                                                             |
| Availability                                                                                                                                 | <input type="checkbox"/> Scientific publication<br><input type="checkbox"/> Official report available on the internet or in other public forum<br><input type="checkbox"/> Official report available from network<br><input type="checkbox"/> Not available |
| Frequency                                                                                                                                    | <input type="checkbox"/> $\geq 1$ time/year<br><input type="checkbox"/> < 1 time/year                                                                                                                                                                       |
| Historical reference                                                                                                                         | <input type="checkbox"/> over $\geq 5$ years<br><input type="checkbox"/> between 1 and 5 years<br><input type="checkbox"/> no historical analysis                                                                                                           |
| <b>COMMENT(S)</b>                                                                                                                            |                                                                                                                                                                                                                                                             |
| Network combining the competency of different networks to achieve Natura2000 protection goals. No recent reporting available on the website. |                                                                                                                                                                                                                                                             |

## GSEN-09-0073.00.2 RO – ASAS

| EuropaBio's coordinated approach to General Surveillance: Existing Networks |                                                                                                                                                                                                                                                                                                                                                                                                                                                                                                                                                                                      |                                                                                                                                                                                                                                                                    |  |
|-----------------------------------------------------------------------------|--------------------------------------------------------------------------------------------------------------------------------------------------------------------------------------------------------------------------------------------------------------------------------------------------------------------------------------------------------------------------------------------------------------------------------------------------------------------------------------------------------------------------------------------------------------------------------------|--------------------------------------------------------------------------------------------------------------------------------------------------------------------------------------------------------------------------------------------------------------------|--|
| <b>ORGANISATION</b>                                                         |                                                                                                                                                                                                                                                                                                                                                                                                                                                                                                                                                                                      |                                                                                                                                                                                                                                                                    |  |
| EuropaBio reference                                                         | GS-EN-09-0073                                                                                                                                                                                                                                                                                                                                                                                                                                                                                                                                                                        |                                                                                                                                                                                                                                                                    |  |
| Official name of the Network                                                | <b>Academia de Științe Agricole și Silvice "Gheorghe Ionescu-Șișești" (A.S.A.S.)</b>                                                                                                                                                                                                                                                                                                                                                                                                                                                                                                 |                                                                                                                                                                                                                                                                    |  |
| Other names                                                                 | Academy Of Agricultural And Forestry Sciences "Gheorghe Ionescu-Sisesti": Scientific Commission on Biotechnology                                                                                                                                                                                                                                                                                                                                                                                                                                                                     |                                                                                                                                                                                                                                                                    |  |
| Type of organisation                                                        | Academic<br>Founded 1969                                                                                                                                                                                                                                                                                                                                                                                                                                                                                                                                                             |                                                                                                                                                                                                                                                                    |  |
| Coordinates                                                                 | Blvd. Marasti Nr. 61, Sector 1,<br>011464 Bucharest<br><br>Fax: +40-21-3184478<br>Email: asas[at]asas.ro                                                                                                                                                                                                                                                                                                                                                                                                                                                                             |                                                                                                                                                                                                                                                                    |  |
| Website                                                                     | <a href="http://www.asas.ro">http://www.asas.ro</a>                                                                                                                                                                                                                                                                                                                                                                                                                                                                                                                                  |                                                                                                                                                                                                                                                                    |  |
| Funding                                                                     | Government (Ministry of Agriculture)                                                                                                                                                                                                                                                                                                                                                                                                                                                                                                                                                 |                                                                                                                                                                                                                                                                    |  |
| Conflict of interest                                                        | -                                                                                                                                                                                                                                                                                                                                                                                                                                                                                                                                                                                    |                                                                                                                                                                                                                                                                    |  |
| Part of other network(s)                                                    |                                                                                                                                                                                                                                                                                                                                                                                                                                                                                                                                                                                      |                                                                                                                                                                                                                                                                    |  |
| Grouping other network(s)                                                   | 17 Agricultural R & D Institutes and Centers and 51 Agricultural R & D Stations                                                                                                                                                                                                                                                                                                                                                                                                                                                                                                      |                                                                                                                                                                                                                                                                    |  |
| <b>MONITORING SUBJECT</b>                                                   |                                                                                                                                                                                                                                                                                                                                                                                                                                                                                                                                                                                      |                                                                                                                                                                                                                                                                    |  |
| Description                                                                 | Applied agronomic research for sustainable agriculture in Romania.                                                                                                                                                                                                                                                                                                                                                                                                                                                                                                                   |                                                                                                                                                                                                                                                                    |  |
| Protection goal(s) and/or influencing factor(s)                             | <input checked="" type="checkbox"/> Protection goal<br><br><input type="checkbox"/> Biodiversity / General<br><input type="checkbox"/> Human Health<br><input type="checkbox"/> Animal Health<br><input type="checkbox"/> Plant Health<br><input checked="" type="checkbox"/> Soil function<br><input type="checkbox"/> Water quality<br><input checked="" type="checkbox"/> Sustainable Agriculture                                                                                                                                                                                 | <input checked="" type="checkbox"/> Influencing factor<br><br><input checked="" type="checkbox"/> Agronomic practice<br><input type="checkbox"/> Plant protection<br><input type="checkbox"/> GMO cultivation<br><input type="checkbox"/> Environmental conditions |  |
| Duplication of Farmer's questionnaire                                       | <input type="checkbox"/> No duplication<br><input checked="" type="checkbox"/> Partly duplication<br><input type="checkbox"/> Complete duplication                                                                                                                                                                                                                                                                                                                                                                                                                                   |                                                                                                                                                                                                                                                                    |  |
| <b>SPECIFICITY</b>                                                          |                                                                                                                                                                                                                                                                                                                                                                                                                                                                                                                                                                                      |                                                                                                                                                                                                                                                                    |  |
| Geography                                                                   | <input type="checkbox"/> EU -wide<br><br><input type="checkbox"/> Zone A – North<br><input type="checkbox"/> Denmark,<br><input type="checkbox"/> Estonia,<br><input type="checkbox"/> Latvia,<br><input type="checkbox"/> Lithuania,<br><input type="checkbox"/> Finland,<br><input type="checkbox"/> Sweden                                                                                                                                                                                                                                                                        |                                                                                                                                                                                                                                                                    |  |
|                                                                             | <input checked="" type="checkbox"/> Zone B – Centre:<br><input type="checkbox"/> Belgium,<br><input type="checkbox"/> Czech Republic<br><input type="checkbox"/> Germany,<br><input type="checkbox"/> Ireland,<br><input type="checkbox"/> Luxembourg,<br><input type="checkbox"/> Hungary,<br><input type="checkbox"/> Netherlands,<br><input type="checkbox"/> Austria,<br><input type="checkbox"/> Poland,<br><input checked="" type="checkbox"/> Romania,<br><input type="checkbox"/> Slovenia,<br><input type="checkbox"/> Slovakia,<br><input type="checkbox"/> United Kingdom |                                                                                                                                                                                                                                                                    |  |
|                                                                             | <input type="checkbox"/> Zone C – South<br><input type="checkbox"/> Bulgaria,<br><input type="checkbox"/> Greece,<br><input type="checkbox"/> Spain,<br><input type="checkbox"/> France,<br><input type="checkbox"/> Italy,<br><input type="checkbox"/> Cyprus,<br><input type="checkbox"/> Malta,<br><input type="checkbox"/> Portugal                                                                                                                                                                                                                                              |                                                                                                                                                                                                                                                                    |  |
|                                                                             | <input type="checkbox"/> Regional (specify)<br><input type="checkbox"/> Local (specify)                                                                                                                                                                                                                                                                                                                                                                                                                                                                                              |                                                                                                                                                                                                                                                                    |  |
| Factors                                                                     | <input checked="" type="checkbox"/> Multiple species/items (specify): agronomic indicators, soil quality and performance<br><input type="checkbox"/> Single species/item (specify)                                                                                                                                                                                                                                                                                                                                                                                                   |                                                                                                                                                                                                                                                                    |  |
| Crop                                                                        | <input type="checkbox"/> No specific crop(s)<br><input checked="" type="checkbox"/> Several crops (e.g. all cereals)<br><input type="checkbox"/> Single crop                                                                                                                                                                                                                                                                                                                                                                                                                         |                                                                                                                                                                                                                                                                    |  |
| Trait /treatment                                                            | <input checked="" type="checkbox"/> No specific traits/treatments<br><input type="checkbox"/> Several traits/treatments<br><input type="checkbox"/> Single trait/treatment                                                                                                                                                                                                                                                                                                                                                                                                           |                                                                                                                                                                                                                                                                    |  |
| GMO                                                                         | <input checked="" type="checkbox"/> No GMO bias<br><input type="checkbox"/> GMO specific                                                                                                                                                                                                                                                                                                                                                                                                                                                                                             |                                                                                                                                                                                                                                                                    |  |
| <b>METHODOLOGY</b>                                                          |                                                                                                                                                                                                                                                                                                                                                                                                                                                                                                                                                                                      |                                                                                                                                                                                                                                                                    |  |

|                                                                                       |                                                                                                                                                                                                                                                             |
|---------------------------------------------------------------------------------------|-------------------------------------------------------------------------------------------------------------------------------------------------------------------------------------------------------------------------------------------------------------|
| Observations                                                                          | <input type="checkbox"/> Reported, verifiable methodology<br><input type="checkbox"/> Reported, unverifiable methodology<br><input type="checkbox"/> Unknown, unverifiable methodology                                                                      |
| Frequency                                                                             | <input type="checkbox"/> > 1 time/year<br><input type="checkbox"/> 1 time/year<br><input type="checkbox"/> < 1 time/year                                                                                                                                    |
| Future                                                                                | <input type="checkbox"/> For $\geq 5$ years<br><input type="checkbox"/> between 1 and 5 years<br><input type="checkbox"/> no prospect                                                                                                                       |
| Quality of performers                                                                 | <input type="checkbox"/> Trained, professionals<br><input type="checkbox"/> Trained, non-professionals – training by documentation, volunteers<br><input type="checkbox"/> Uncertain or not -specified                                                      |
| Quality of data                                                                       | <input type="checkbox"/> Standard recording of raw data<br><input type="checkbox"/> Free recording of raw data<br><input type="checkbox"/> Anecdotic                                                                                                        |
| Analysis                                                                              | <input type="checkbox"/> Reported, verifiable methodology<br><input type="checkbox"/> Reported, unverifiable methodology<br><input type="checkbox"/> Unknown, unverifiable methodology                                                                      |
| Quality of analysis                                                                   | <input type="checkbox"/> Scientifically based<br><input type="checkbox"/> Indicative only<br><input type="checkbox"/> Unknown                                                                                                                               |
| <b>REPORTING</b>                                                                      |                                                                                                                                                                                                                                                             |
| Language                                                                              | Reporting language(s): Romanian/English                                                                                                                                                                                                                     |
| Availability                                                                          | <input type="checkbox"/> Scientific publication<br><input type="checkbox"/> Official report available on the internet or in other public forum<br><input type="checkbox"/> Official report available from network<br><input type="checkbox"/> Not available |
| Frequency                                                                             | <input type="checkbox"/> $\geq 1$ time/year<br><input type="checkbox"/> < 1 time/year                                                                                                                                                                       |
| Historical reference                                                                  | <input type="checkbox"/> over $\geq 5$ years<br><input type="checkbox"/> between 1 and 5 years<br><input type="checkbox"/> no historical analysis                                                                                                           |
| <b>COMMENT(S)</b>                                                                     |                                                                                                                                                                                                                                                             |
| No direct reporting by the network as work is published in the scientific literature. |                                                                                                                                                                                                                                                             |

## GSEN-09-0076.00.2 RO – ICDPP

| EuropaBio's coordinated approach to General Surveillance: Existing Networks |                                                                                                                                                                                                                                                                                                                                                                                       |                                                                                                                                                                                                                                                                                                                                                                                                                                                                                                                              |                                                                                                                                                                                                                                                                                              |
|-----------------------------------------------------------------------------|---------------------------------------------------------------------------------------------------------------------------------------------------------------------------------------------------------------------------------------------------------------------------------------------------------------------------------------------------------------------------------------|------------------------------------------------------------------------------------------------------------------------------------------------------------------------------------------------------------------------------------------------------------------------------------------------------------------------------------------------------------------------------------------------------------------------------------------------------------------------------------------------------------------------------|----------------------------------------------------------------------------------------------------------------------------------------------------------------------------------------------------------------------------------------------------------------------------------------------|
| <b>ORGANISATION</b>                                                         |                                                                                                                                                                                                                                                                                                                                                                                       |                                                                                                                                                                                                                                                                                                                                                                                                                                                                                                                              |                                                                                                                                                                                                                                                                                              |
| EuropaBio reference                                                         | GS-EN-09-0076                                                                                                                                                                                                                                                                                                                                                                         |                                                                                                                                                                                                                                                                                                                                                                                                                                                                                                                              |                                                                                                                                                                                                                                                                                              |
| Official name of the Network                                                | <b>Academia de Științe Agricole și Silvice "Gheorghe Ionescu-Șișești" (A.S.A.S.)<br/>Institutul de Cercetare-Dezvoltare pentru Protecția Plantelor</b>                                                                                                                                                                                                                                |                                                                                                                                                                                                                                                                                                                                                                                                                                                                                                                              |                                                                                                                                                                                                                                                                                              |
| Other names                                                                 | Research-Development Plant Protection Institute                                                                                                                                                                                                                                                                                                                                       |                                                                                                                                                                                                                                                                                                                                                                                                                                                                                                                              |                                                                                                                                                                                                                                                                                              |
| Type of organisation                                                        | Governmental<br>Founded 1928                                                                                                                                                                                                                                                                                                                                                          |                                                                                                                                                                                                                                                                                                                                                                                                                                                                                                                              |                                                                                                                                                                                                                                                                                              |
| Coordinates                                                                 | 8 Ion Ionescu de la Brad Blv. Division 1<br>013813 Bucharest<br><br>Fax: 004-021-2693239<br>Email: secretariat stiintific[at]icdpp.ro                                                                                                                                                                                                                                                 |                                                                                                                                                                                                                                                                                                                                                                                                                                                                                                                              |                                                                                                                                                                                                                                                                                              |
| Website                                                                     | <a href="http://www.icdpp.ro">http://www.icdpp.ro</a>                                                                                                                                                                                                                                                                                                                                 |                                                                                                                                                                                                                                                                                                                                                                                                                                                                                                                              |                                                                                                                                                                                                                                                                                              |
| Funding                                                                     | Government (Ministry of Agriculture)                                                                                                                                                                                                                                                                                                                                                  |                                                                                                                                                                                                                                                                                                                                                                                                                                                                                                                              |                                                                                                                                                                                                                                                                                              |
| Conflict of interest                                                        | -                                                                                                                                                                                                                                                                                                                                                                                     |                                                                                                                                                                                                                                                                                                                                                                                                                                                                                                                              |                                                                                                                                                                                                                                                                                              |
| Part of other network(s)                                                    | ASAS                                                                                                                                                                                                                                                                                                                                                                                  |                                                                                                                                                                                                                                                                                                                                                                                                                                                                                                                              |                                                                                                                                                                                                                                                                                              |
| Grouping other network(s)                                                   | -                                                                                                                                                                                                                                                                                                                                                                                     |                                                                                                                                                                                                                                                                                                                                                                                                                                                                                                                              |                                                                                                                                                                                                                                                                                              |
| <b>MONITORING SUBJECT</b>                                                   |                                                                                                                                                                                                                                                                                                                                                                                       |                                                                                                                                                                                                                                                                                                                                                                                                                                                                                                                              |                                                                                                                                                                                                                                                                                              |
| Description                                                                 | Applied agronomic research for sustainable agriculture in Romania.                                                                                                                                                                                                                                                                                                                    |                                                                                                                                                                                                                                                                                                                                                                                                                                                                                                                              |                                                                                                                                                                                                                                                                                              |
| Protection goal(s) and/or influencing factor(s)                             | <input checked="" type="checkbox"/> Protection goal<br><input type="checkbox"/> Biodiversity / General<br><input type="checkbox"/> Human Health<br><input type="checkbox"/> Animal Health<br><input checked="" type="checkbox"/> Plant Health<br><input type="checkbox"/> Soil function<br><input type="checkbox"/> Water quality<br><input type="checkbox"/> Sustainable Agriculture | <input checked="" type="checkbox"/> Influencing factor<br><input checked="" type="checkbox"/> Agronomic practice<br><input checked="" type="checkbox"/> Plant protection<br><input type="checkbox"/> GMO cultivation<br><input type="checkbox"/> Environmental conditions                                                                                                                                                                                                                                                    |                                                                                                                                                                                                                                                                                              |
| Duplication of Farmer's questionnaire                                       | <input type="checkbox"/> No duplication<br><input checked="" type="checkbox"/> Partly duplication<br><input type="checkbox"/> Complete duplication                                                                                                                                                                                                                                    |                                                                                                                                                                                                                                                                                                                                                                                                                                                                                                                              |                                                                                                                                                                                                                                                                                              |
| <b>SPECIFICITY</b>                                                          |                                                                                                                                                                                                                                                                                                                                                                                       |                                                                                                                                                                                                                                                                                                                                                                                                                                                                                                                              |                                                                                                                                                                                                                                                                                              |
| Geography                                                                   | <input type="checkbox"/> EU -wide<br><input type="checkbox"/> Zone A – North<br><input checked="" type="checkbox"/> Zone B – Centre:<br><input type="checkbox"/> Zone C – South                                                                                                                                                                                                       |                                                                                                                                                                                                                                                                                                                                                                                                                                                                                                                              |                                                                                                                                                                                                                                                                                              |
|                                                                             | <input type="checkbox"/> Denmark,<br><input type="checkbox"/> Estonia,<br><input type="checkbox"/> Latvia,<br><input type="checkbox"/> Lithuania,<br><input type="checkbox"/> Finland,<br><input type="checkbox"/> Sweden                                                                                                                                                             | <input type="checkbox"/> Belgium,<br><input type="checkbox"/> Czech Republic<br><input type="checkbox"/> Germany,<br><input type="checkbox"/> Ireland,<br><input type="checkbox"/> Luxembourg,<br><input type="checkbox"/> Hungary,<br><input type="checkbox"/> Netherlands,<br><input type="checkbox"/> Austria,<br><input type="checkbox"/> Poland,<br><input checked="" type="checkbox"/> Romania,<br><input type="checkbox"/> Slovenia,<br><input type="checkbox"/> Slovakia,<br><input type="checkbox"/> United Kingdom | <input type="checkbox"/> Bulgaria,<br><input type="checkbox"/> Greece,<br><input type="checkbox"/> Spain,<br><input type="checkbox"/> France,<br><input type="checkbox"/> Italy,<br><input type="checkbox"/> Cyprus,<br><input type="checkbox"/> Malta,<br><input type="checkbox"/> Portugal |
|                                                                             | <input type="checkbox"/> Regional (specify)<br><input type="checkbox"/> Local (specify)                                                                                                                                                                                                                                                                                               |                                                                                                                                                                                                                                                                                                                                                                                                                                                                                                                              |                                                                                                                                                                                                                                                                                              |
| Factors                                                                     | <input checked="" type="checkbox"/> Multiple species/items (specify): agronomic indicators, pest species<br><input type="checkbox"/> Single species/item (specify)                                                                                                                                                                                                                    |                                                                                                                                                                                                                                                                                                                                                                                                                                                                                                                              |                                                                                                                                                                                                                                                                                              |
| Crop                                                                        | <input type="checkbox"/> No specific crop(s)<br><input checked="" type="checkbox"/> Several crops (e.g. all cereals)<br><input type="checkbox"/> Single crop                                                                                                                                                                                                                          |                                                                                                                                                                                                                                                                                                                                                                                                                                                                                                                              |                                                                                                                                                                                                                                                                                              |
| Trait /treatment                                                            | <input checked="" type="checkbox"/> No specific traits/treatments<br><input type="checkbox"/> Several traits/treatments<br><input type="checkbox"/> Single trait/treatment                                                                                                                                                                                                            |                                                                                                                                                                                                                                                                                                                                                                                                                                                                                                                              |                                                                                                                                                                                                                                                                                              |
| GMO                                                                         | <input checked="" type="checkbox"/> No GMO bias<br><input type="checkbox"/> GMO specific                                                                                                                                                                                                                                                                                              |                                                                                                                                                                                                                                                                                                                                                                                                                                                                                                                              |                                                                                                                                                                                                                                                                                              |
| <b>METHODOLOGY</b>                                                          |                                                                                                                                                                                                                                                                                                                                                                                       |                                                                                                                                                                                                                                                                                                                                                                                                                                                                                                                              |                                                                                                                                                                                                                                                                                              |

|                                                                                       |                                                                                                                                                                                                                                                             |
|---------------------------------------------------------------------------------------|-------------------------------------------------------------------------------------------------------------------------------------------------------------------------------------------------------------------------------------------------------------|
| Observations                                                                          | <input type="checkbox"/> Reported, verifiable methodology<br><input type="checkbox"/> Reported, unverifiable methodology<br><input type="checkbox"/> Unknown, unverifiable methodology                                                                      |
| Frequency                                                                             | <input type="checkbox"/> > 1 time/year<br><input type="checkbox"/> 1 time/year<br><input type="checkbox"/> < 1 time/year                                                                                                                                    |
| Future                                                                                | <input type="checkbox"/> For $\geq$ 5 years<br><input type="checkbox"/> between 1 and 5 years<br><input type="checkbox"/> no prospect                                                                                                                       |
| Quality of performers                                                                 | <input type="checkbox"/> Trained, professionals<br><input type="checkbox"/> Trained, non-professionals – training by documentation, volunteers<br><input type="checkbox"/> Uncertain or not -specified                                                      |
| Quality of data                                                                       | <input type="checkbox"/> Standard recording of raw data<br><input type="checkbox"/> Free recording of raw data<br><input type="checkbox"/> Anecdotic                                                                                                        |
| Analysis                                                                              | <input type="checkbox"/> Reported, verifiable methodology<br><input type="checkbox"/> Reported, unverifiable methodology<br><input type="checkbox"/> Unknown, unverifiable methodology                                                                      |
| Quality of analysis                                                                   | <input type="checkbox"/> Scientifically based<br><input type="checkbox"/> Indicative only<br><input type="checkbox"/> Unknown                                                                                                                               |
| <b>REPORTING</b>                                                                      |                                                                                                                                                                                                                                                             |
| Language                                                                              | Reporting language(s): Romanian/English                                                                                                                                                                                                                     |
| Availability                                                                          | <input type="checkbox"/> Scientific publication<br><input type="checkbox"/> Official report available on the internet or in other public forum<br><input type="checkbox"/> Official report available from network<br><input type="checkbox"/> Not available |
| Frequency                                                                             | <input type="checkbox"/> $\geq$ 1 time/year<br><input type="checkbox"/> < 1 time/year                                                                                                                                                                       |
| Historical reference                                                                  | <input type="checkbox"/> over $\geq$ 5 years<br><input type="checkbox"/> between 1 and 5 years<br><input type="checkbox"/> no historical analysis                                                                                                           |
| <b>COMMENT(S)</b>                                                                     |                                                                                                                                                                                                                                                             |
| No direct reporting by the network as work is published in the scientific literature. |                                                                                                                                                                                                                                                             |

## GSEN-09-0080.00.2 RO – ICPA

| EuropaBio's coordinated approach to General Surveillance: Existing Networks |                                                                                                                                                                                                                                                                                                                                                                                                  |                                                                                                                                                                                                                                                                                                                                                                                                                                                                                                                              |                                                                                                                                                                                                                                                                                              |
|-----------------------------------------------------------------------------|--------------------------------------------------------------------------------------------------------------------------------------------------------------------------------------------------------------------------------------------------------------------------------------------------------------------------------------------------------------------------------------------------|------------------------------------------------------------------------------------------------------------------------------------------------------------------------------------------------------------------------------------------------------------------------------------------------------------------------------------------------------------------------------------------------------------------------------------------------------------------------------------------------------------------------------|----------------------------------------------------------------------------------------------------------------------------------------------------------------------------------------------------------------------------------------------------------------------------------------------|
| <b>ORGANISATION</b>                                                         |                                                                                                                                                                                                                                                                                                                                                                                                  |                                                                                                                                                                                                                                                                                                                                                                                                                                                                                                                              |                                                                                                                                                                                                                                                                                              |
| EuropaBio reference                                                         | GS-EN-09-0080                                                                                                                                                                                                                                                                                                                                                                                    |                                                                                                                                                                                                                                                                                                                                                                                                                                                                                                                              |                                                                                                                                                                                                                                                                                              |
| Official name of the Network                                                | Institutul de Cercetari pentru Pedologie si Agrochimie (ICPA)                                                                                                                                                                                                                                                                                                                                    |                                                                                                                                                                                                                                                                                                                                                                                                                                                                                                                              |                                                                                                                                                                                                                                                                                              |
| Other names                                                                 | Research Institute for Soil Science and Agrochemistry, INCDPAPM-ICPA                                                                                                                                                                                                                                                                                                                             |                                                                                                                                                                                                                                                                                                                                                                                                                                                                                                                              |                                                                                                                                                                                                                                                                                              |
| Type of organisation                                                        | Governmental<br>Founded 1970                                                                                                                                                                                                                                                                                                                                                                     |                                                                                                                                                                                                                                                                                                                                                                                                                                                                                                                              |                                                                                                                                                                                                                                                                                              |
| Coordinates                                                                 | Marasti Ave. 61<br>011464 Bucharest<br><br>Fax: 318.43.48<br>Email: office[at]icpa.ro                                                                                                                                                                                                                                                                                                            |                                                                                                                                                                                                                                                                                                                                                                                                                                                                                                                              |                                                                                                                                                                                                                                                                                              |
| Website                                                                     | <a href="http://www.icpa.ro">http://www.icpa.ro</a>                                                                                                                                                                                                                                                                                                                                              |                                                                                                                                                                                                                                                                                                                                                                                                                                                                                                                              |                                                                                                                                                                                                                                                                                              |
| Funding                                                                     | Government (Ministry of Agriculture)                                                                                                                                                                                                                                                                                                                                                             |                                                                                                                                                                                                                                                                                                                                                                                                                                                                                                                              |                                                                                                                                                                                                                                                                                              |
| Conflict of interest                                                        | -                                                                                                                                                                                                                                                                                                                                                                                                |                                                                                                                                                                                                                                                                                                                                                                                                                                                                                                                              |                                                                                                                                                                                                                                                                                              |
| Part of other network(s)                                                    | ASAS                                                                                                                                                                                                                                                                                                                                                                                             |                                                                                                                                                                                                                                                                                                                                                                                                                                                                                                                              |                                                                                                                                                                                                                                                                                              |
| Grouping other network(s)                                                   |                                                                                                                                                                                                                                                                                                                                                                                                  |                                                                                                                                                                                                                                                                                                                                                                                                                                                                                                                              |                                                                                                                                                                                                                                                                                              |
| <b>MONITORING SUBJECT</b>                                                   |                                                                                                                                                                                                                                                                                                                                                                                                  |                                                                                                                                                                                                                                                                                                                                                                                                                                                                                                                              |                                                                                                                                                                                                                                                                                              |
| Description                                                                 | Research, basic and applied, on pedology and agrochemistry for monitoring and long-term forecast of soils and agricultural land in Romania.                                                                                                                                                                                                                                                      |                                                                                                                                                                                                                                                                                                                                                                                                                                                                                                                              |                                                                                                                                                                                                                                                                                              |
| Protection goal(s) and/or influencing factor(s)                             | <input checked="" type="checkbox"/> Protection goal<br><input type="checkbox"/> Biodiversity / General<br><input type="checkbox"/> Human Health<br><input type="checkbox"/> Animal Health<br><input type="checkbox"/> Plant Health<br><input checked="" type="checkbox"/> Soil function<br><input type="checkbox"/> Water quality<br><input checked="" type="checkbox"/> Sustainable Agriculture | <input checked="" type="checkbox"/> Influencing factor<br><input checked="" type="checkbox"/> Agronomic practice<br><input type="checkbox"/> Plant protection<br><input type="checkbox"/> GMO cultivation<br><input checked="" type="checkbox"/> Environmental conditions                                                                                                                                                                                                                                                    |                                                                                                                                                                                                                                                                                              |
| Duplication of Farmer's questionnaire                                       | <input type="checkbox"/> No duplication<br><input checked="" type="checkbox"/> Partly duplication<br><input type="checkbox"/> Complete duplication                                                                                                                                                                                                                                               |                                                                                                                                                                                                                                                                                                                                                                                                                                                                                                                              |                                                                                                                                                                                                                                                                                              |
| <b>SPECIFICITY</b>                                                          |                                                                                                                                                                                                                                                                                                                                                                                                  |                                                                                                                                                                                                                                                                                                                                                                                                                                                                                                                              |                                                                                                                                                                                                                                                                                              |
| Geography                                                                   | <input type="checkbox"/> EU -wide<br><input type="checkbox"/> Zone A – North<br><input checked="" type="checkbox"/> Zone B – Centre:<br><input type="checkbox"/> Zone C – South                                                                                                                                                                                                                  |                                                                                                                                                                                                                                                                                                                                                                                                                                                                                                                              |                                                                                                                                                                                                                                                                                              |
|                                                                             | <input type="checkbox"/> Denmark,<br><input type="checkbox"/> Estonia,<br><input type="checkbox"/> Latvia,<br><input type="checkbox"/> Lithuania,<br><input type="checkbox"/> Finland,<br><input type="checkbox"/> Sweden                                                                                                                                                                        | <input type="checkbox"/> Belgium,<br><input type="checkbox"/> Czech Republic<br><input type="checkbox"/> Germany,<br><input type="checkbox"/> Ireland,<br><input type="checkbox"/> Luxembourg,<br><input type="checkbox"/> Hungary,<br><input type="checkbox"/> Netherlands,<br><input type="checkbox"/> Austria,<br><input type="checkbox"/> Poland,<br><input checked="" type="checkbox"/> Romania,<br><input type="checkbox"/> Slovenia,<br><input type="checkbox"/> Slovakia,<br><input type="checkbox"/> United Kingdom | <input type="checkbox"/> Bulgaria,<br><input type="checkbox"/> Greece,<br><input type="checkbox"/> Spain,<br><input type="checkbox"/> France,<br><input type="checkbox"/> Italy,<br><input type="checkbox"/> Cyprus,<br><input type="checkbox"/> Malta,<br><input type="checkbox"/> Portugal |
|                                                                             | <input type="checkbox"/> Regional (specify)<br><input type="checkbox"/> Local (specify)                                                                                                                                                                                                                                                                                                          |                                                                                                                                                                                                                                                                                                                                                                                                                                                                                                                              |                                                                                                                                                                                                                                                                                              |
| Factors                                                                     | <input checked="" type="checkbox"/> Multiple species/items (specify): agronomic indicators, soil quality<br><input type="checkbox"/> Single species/item (specify)                                                                                                                                                                                                                               |                                                                                                                                                                                                                                                                                                                                                                                                                                                                                                                              |                                                                                                                                                                                                                                                                                              |
| Crop                                                                        | <input checked="" type="checkbox"/> No specific crop(s)<br><input type="checkbox"/> Several crops (e.g. all cereals)<br><input type="checkbox"/> Single crop                                                                                                                                                                                                                                     |                                                                                                                                                                                                                                                                                                                                                                                                                                                                                                                              |                                                                                                                                                                                                                                                                                              |
| Trait /treatment                                                            | <input checked="" type="checkbox"/> No specific traits/treatments<br><input type="checkbox"/> Several traits/treatments<br><input type="checkbox"/> Single trait/treatment                                                                                                                                                                                                                       |                                                                                                                                                                                                                                                                                                                                                                                                                                                                                                                              |                                                                                                                                                                                                                                                                                              |
| GMO                                                                         | <input checked="" type="checkbox"/> No GMO bias<br><input type="checkbox"/> GMO specific                                                                                                                                                                                                                                                                                                         |                                                                                                                                                                                                                                                                                                                                                                                                                                                                                                                              |                                                                                                                                                                                                                                                                                              |
| <b>METHODOLOGY</b>                                                          |                                                                                                                                                                                                                                                                                                                                                                                                  |                                                                                                                                                                                                                                                                                                                                                                                                                                                                                                                              |                                                                                                                                                                                                                                                                                              |



|                                                                                       |                                                                                                                                                                                                                                                             |
|---------------------------------------------------------------------------------------|-------------------------------------------------------------------------------------------------------------------------------------------------------------------------------------------------------------------------------------------------------------|
| Observations                                                                          | <input type="checkbox"/> Reported, verifiable methodology<br><input type="checkbox"/> Reported, unverifiable methodology<br><input type="checkbox"/> Unknown, unverifiable methodology                                                                      |
| Frequency                                                                             | <input type="checkbox"/> > 1 time/year<br><input type="checkbox"/> 1 time/year<br><input type="checkbox"/> < 1 time/year                                                                                                                                    |
| Future                                                                                | <input type="checkbox"/> For $\geq 5$ years<br><input type="checkbox"/> between 1 and 5 years<br><input type="checkbox"/> no prospect                                                                                                                       |
| Quality of performers                                                                 | <input type="checkbox"/> Trained, professionals<br><input type="checkbox"/> Trained, non-professionals – training by documentation, volunteers<br><input type="checkbox"/> Uncertain or not -specified                                                      |
| Quality of data                                                                       | <input type="checkbox"/> Standard recording of raw data<br><input type="checkbox"/> Free recording of raw data<br><input type="checkbox"/> Anecdotic                                                                                                        |
| Analysis                                                                              | <input type="checkbox"/> Reported, verifiable methodology<br><input type="checkbox"/> Reported, unverifiable methodology<br><input type="checkbox"/> Unknown, unverifiable methodology                                                                      |
| Quality of analysis                                                                   | <input type="checkbox"/> Scientifically based<br><input type="checkbox"/> Indicative only<br><input type="checkbox"/> Unknown                                                                                                                               |
| <b>REPORTING</b>                                                                      |                                                                                                                                                                                                                                                             |
| Language                                                                              | Reporting language(s): Romanian/English                                                                                                                                                                                                                     |
| Availability                                                                          | <input type="checkbox"/> Scientific publication<br><input type="checkbox"/> Official report available on the internet or in other public forum<br><input type="checkbox"/> Official report available from network<br><input type="checkbox"/> Not available |
| Frequency                                                                             | <input type="checkbox"/> $\geq 1$ time/year<br><input type="checkbox"/> < 1 time/year                                                                                                                                                                       |
| Historical reference                                                                  | <input type="checkbox"/> over $\geq 5$ years<br><input type="checkbox"/> between 1 and 5 years<br><input type="checkbox"/> no historical analysis                                                                                                           |
| <b>COMMENT(S)</b>                                                                     |                                                                                                                                                                                                                                                             |
| No direct reporting by the network as work is published in the scientific literature. |                                                                                                                                                                                                                                                             |

## GSEN-09-0224.00.1 RO – ICDA

| EuropaBio's coordinated approach to General Surveillance: Existing Networks |                                                                                                                                                                                                                                                                                                                                          |                                                                                                                                                                                                                                                                                                                                                                                                                                                                                                                              |                                                                                                                                                                                                                                                                                              |
|-----------------------------------------------------------------------------|------------------------------------------------------------------------------------------------------------------------------------------------------------------------------------------------------------------------------------------------------------------------------------------------------------------------------------------|------------------------------------------------------------------------------------------------------------------------------------------------------------------------------------------------------------------------------------------------------------------------------------------------------------------------------------------------------------------------------------------------------------------------------------------------------------------------------------------------------------------------------|----------------------------------------------------------------------------------------------------------------------------------------------------------------------------------------------------------------------------------------------------------------------------------------------|
| <b>ORGANISATION</b>                                                         |                                                                                                                                                                                                                                                                                                                                          |                                                                                                                                                                                                                                                                                                                                                                                                                                                                                                                              |                                                                                                                                                                                                                                                                                              |
| EuropaBio reference                                                         | GS-EN-09-0224                                                                                                                                                                                                                                                                                                                            |                                                                                                                                                                                                                                                                                                                                                                                                                                                                                                                              |                                                                                                                                                                                                                                                                                              |
| Official name of the Network                                                | <b>ACA - Asociatia Crescatorilor de Albine din Romania</b><br><b>ICDA - Institutul de Cercetare Dezvoltare pentru Apicultura</b>                                                                                                                                                                                                         |                                                                                                                                                                                                                                                                                                                                                                                                                                                                                                                              |                                                                                                                                                                                                                                                                                              |
| Other names                                                                 | Institute for Beekeeping Research & Development; Romanian Beekeepers' Association                                                                                                                                                                                                                                                        |                                                                                                                                                                                                                                                                                                                                                                                                                                                                                                                              |                                                                                                                                                                                                                                                                                              |
| Type of organisation                                                        | Professional<br>ACA founded 1958; ICDA founded 1930                                                                                                                                                                                                                                                                                      |                                                                                                                                                                                                                                                                                                                                                                                                                                                                                                                              |                                                                                                                                                                                                                                                                                              |
| Coordinates                                                                 | ACA<br>Bulevar Ficusului 42<br>71544 Bucharest<br><br>Fax: +40-21-2334019<br><br>ICDA<br>Bulevar Ficusului 42, sectorul 1,<br>R-71544 Bucharest<br><br>email: secretariat[at]icdapicultura.ro<br>icdca[at]adslexpres.ro                                                                                                                  |                                                                                                                                                                                                                                                                                                                                                                                                                                                                                                                              |                                                                                                                                                                                                                                                                                              |
| Website                                                                     | <a href="http://www.icdapicultura.com">http://www.icdapicultura.com</a><br><a href="http://www.icdapicultura.ro/">http://www.icdapicultura.ro/</a>                                                                                                                                                                                       |                                                                                                                                                                                                                                                                                                                                                                                                                                                                                                                              |                                                                                                                                                                                                                                                                                              |
| Funding                                                                     | 40000 paying beekeepers                                                                                                                                                                                                                                                                                                                  |                                                                                                                                                                                                                                                                                                                                                                                                                                                                                                                              |                                                                                                                                                                                                                                                                                              |
| Conflict of interest                                                        | -                                                                                                                                                                                                                                                                                                                                        |                                                                                                                                                                                                                                                                                                                                                                                                                                                                                                                              |                                                                                                                                                                                                                                                                                              |
| Part of other network(s)                                                    | Apimondia - International Federation of Beekeepers' Associations<br><a href="http://www.apimondia.com/">http://www.apimondia.com/</a>                                                                                                                                                                                                    |                                                                                                                                                                                                                                                                                                                                                                                                                                                                                                                              |                                                                                                                                                                                                                                                                                              |
| Grouping other network(s)                                                   | ACA has 41 county branches, 38 commercial units (S.C. APICOLA, Ltd.), and The Beekeeping Complex S.A.                                                                                                                                                                                                                                    |                                                                                                                                                                                                                                                                                                                                                                                                                                                                                                                              |                                                                                                                                                                                                                                                                                              |
| <b>MONITORING SUBJECT</b>                                                   |                                                                                                                                                                                                                                                                                                                                          |                                                                                                                                                                                                                                                                                                                                                                                                                                                                                                                              |                                                                                                                                                                                                                                                                                              |
| Description                                                                 | Bee health                                                                                                                                                                                                                                                                                                                               |                                                                                                                                                                                                                                                                                                                                                                                                                                                                                                                              |                                                                                                                                                                                                                                                                                              |
| Protection goal(s) and/or influencing factor(s)                             | <input checked="" type="checkbox"/> Protection goal                                                                                                                                                                                                                                                                                      | <input type="checkbox"/> Influencing factor                                                                                                                                                                                                                                                                                                                                                                                                                                                                                  |                                                                                                                                                                                                                                                                                              |
|                                                                             | <input checked="" type="checkbox"/> Biodiversity: Insects<br><input type="checkbox"/> Human Health<br><input checked="" type="checkbox"/> Animal Health<br><input type="checkbox"/> Plant Health<br><input type="checkbox"/> Soil function<br><input type="checkbox"/> Water quality<br><input type="checkbox"/> Sustainable Agriculture | <input type="checkbox"/> Agronomic practice<br><input type="checkbox"/> Plant protection<br><input type="checkbox"/> GMO cultivation<br><input type="checkbox"/> Environmental conditions                                                                                                                                                                                                                                                                                                                                    |                                                                                                                                                                                                                                                                                              |
| Duplication of Farmer's questionnaire                                       | <input checked="" type="checkbox"/> No duplication<br><input type="checkbox"/> Partly duplication<br><input type="checkbox"/> Complete duplication                                                                                                                                                                                       |                                                                                                                                                                                                                                                                                                                                                                                                                                                                                                                              |                                                                                                                                                                                                                                                                                              |
| <b>SPECIFICITY</b>                                                          |                                                                                                                                                                                                                                                                                                                                          |                                                                                                                                                                                                                                                                                                                                                                                                                                                                                                                              |                                                                                                                                                                                                                                                                                              |
| Geography                                                                   | <input type="checkbox"/> EU -wide                                                                                                                                                                                                                                                                                                        |                                                                                                                                                                                                                                                                                                                                                                                                                                                                                                                              |                                                                                                                                                                                                                                                                                              |
|                                                                             | <input type="checkbox"/> Zone A – North                                                                                                                                                                                                                                                                                                  | <input checked="" type="checkbox"/> Zone B – Centre:                                                                                                                                                                                                                                                                                                                                                                                                                                                                         | <input type="checkbox"/> Zone C – South                                                                                                                                                                                                                                                      |
|                                                                             | <input type="checkbox"/> Denmark,<br><input type="checkbox"/> Estonia,<br><input type="checkbox"/> Latvia,<br><input type="checkbox"/> Lithuania,<br><input type="checkbox"/> Finland,<br><input type="checkbox"/> Sweden                                                                                                                | <input type="checkbox"/> Belgium,<br><input type="checkbox"/> Czech Republic<br><input type="checkbox"/> Germany,<br><input type="checkbox"/> Ireland,<br><input type="checkbox"/> Luxembourg,<br><input type="checkbox"/> Hungary,<br><input type="checkbox"/> Netherlands,<br><input type="checkbox"/> Austria,<br><input type="checkbox"/> Poland,<br><input checked="" type="checkbox"/> Romania,<br><input type="checkbox"/> Slovenia,<br><input type="checkbox"/> Slovakia,<br><input type="checkbox"/> United Kingdom | <input type="checkbox"/> Bulgaria,<br><input type="checkbox"/> Greece,<br><input type="checkbox"/> Spain,<br><input type="checkbox"/> France,<br><input type="checkbox"/> Italy,<br><input type="checkbox"/> Cyprus,<br><input type="checkbox"/> Malta,<br><input type="checkbox"/> Portugal |
|                                                                             | <input type="checkbox"/> Regional (specify)<br><input type="checkbox"/> Local (specify)                                                                                                                                                                                                                                                  |                                                                                                                                                                                                                                                                                                                                                                                                                                                                                                                              |                                                                                                                                                                                                                                                                                              |
| Factors                                                                     | <input type="checkbox"/> Multiple species/items (specify)<br><input checked="" type="checkbox"/> Single species/item (specify): bees                                                                                                                                                                                                     |                                                                                                                                                                                                                                                                                                                                                                                                                                                                                                                              |                                                                                                                                                                                                                                                                                              |
| Crop                                                                        | <input checked="" type="checkbox"/> No specific crop(s)<br><input type="checkbox"/> Several crops (e.g. all cereals)                                                                                                                                                                                                                     |                                                                                                                                                                                                                                                                                                                                                                                                                                                                                                                              |                                                                                                                                                                                                                                                                                              |

|                                       |                                                                                                                                                                                                                                                             |
|---------------------------------------|-------------------------------------------------------------------------------------------------------------------------------------------------------------------------------------------------------------------------------------------------------------|
|                                       | <input type="checkbox"/> Single crop                                                                                                                                                                                                                        |
| Trait /treatment                      | <input checked="" type="checkbox"/> No specific traits/treatments<br><input type="checkbox"/> Several traits/treatments<br><input type="checkbox"/> Single trait/treatment                                                                                  |
| GMO                                   | <input checked="" type="checkbox"/> No GMO bias<br><input type="checkbox"/> GMO specific                                                                                                                                                                    |
| <b>METHODOLOGY</b>                    |                                                                                                                                                                                                                                                             |
| Observations                          | <input type="checkbox"/> Reported, verifiable methodology<br><input type="checkbox"/> Reported, unverifiable methodology<br><input type="checkbox"/> Unknown, unverifiable methodology                                                                      |
| Frequency                             | <input type="checkbox"/> > 1 time/year<br><input type="checkbox"/> 1 time/year<br><input type="checkbox"/> < 1 time/year                                                                                                                                    |
| Future                                | <input type="checkbox"/> For ≥ 5 years<br><input type="checkbox"/> between 1 and 5 years<br><input type="checkbox"/> no prospect                                                                                                                            |
| Quality of performers                 | <input type="checkbox"/> Trained, professionals<br><input type="checkbox"/> Trained, non-professionals – training by documentation, volunteers<br><input type="checkbox"/> Uncertain or not -specified                                                      |
| Quality of data                       | <input type="checkbox"/> Standard recording of raw data<br><input type="checkbox"/> Free recording of raw data<br><input type="checkbox"/> Anecdotic                                                                                                        |
| Analysis                              | <input type="checkbox"/> Reported, verifiable methodology<br><input type="checkbox"/> Reported, unverifiable methodology<br><input type="checkbox"/> Unknown, unverifiable methodology                                                                      |
| Quality of analysis                   | <input type="checkbox"/> Scientifically based<br><input type="checkbox"/> Indicative only<br><input type="checkbox"/> Unknown                                                                                                                               |
| <b>REPORTING</b>                      |                                                                                                                                                                                                                                                             |
| Language                              | Reporting language(s): Romanian/English                                                                                                                                                                                                                     |
| Availability                          | <input type="checkbox"/> Scientific publication<br><input type="checkbox"/> Official report available on the internet or in other public forum<br><input type="checkbox"/> Official report available from network<br><input type="checkbox"/> Not available |
| Frequency                             | <input type="checkbox"/> ≥ 1 time/year<br><input type="checkbox"/> < 1 time/year                                                                                                                                                                            |
| Historical reference                  | <input type="checkbox"/> over ≥ 5 years<br><input type="checkbox"/> between 1 and 5 years<br><input type="checkbox"/> no historical analysis                                                                                                                |
| <b>COMMENT(S)</b>                     |                                                                                                                                                                                                                                                             |
| ACA has a journal: 'România apicolă'. |                                                                                                                                                                                                                                                             |

## GSEN-09-0228.00.1 RO – SOR

| EuropaBio's coordinated approach to General Surveillance: Existing Networks |                                                                                                                                                                                                                                                                                                                             |                                                                                                                                                                                                                                                                                                                                                                                                                                                                                                                              |                                                                                                                                                                                                                                                                                              |
|-----------------------------------------------------------------------------|-----------------------------------------------------------------------------------------------------------------------------------------------------------------------------------------------------------------------------------------------------------------------------------------------------------------------------|------------------------------------------------------------------------------------------------------------------------------------------------------------------------------------------------------------------------------------------------------------------------------------------------------------------------------------------------------------------------------------------------------------------------------------------------------------------------------------------------------------------------------|----------------------------------------------------------------------------------------------------------------------------------------------------------------------------------------------------------------------------------------------------------------------------------------------|
| <b>ORGANISATION</b>                                                         |                                                                                                                                                                                                                                                                                                                             |                                                                                                                                                                                                                                                                                                                                                                                                                                                                                                                              |                                                                                                                                                                                                                                                                                              |
| EuropaBio reference                                                         | GS-EN-09-0228                                                                                                                                                                                                                                                                                                               |                                                                                                                                                                                                                                                                                                                                                                                                                                                                                                                              |                                                                                                                                                                                                                                                                                              |
| Official name of the Network                                                | <b>Societatea Ornitologică Română (SOR)</b>                                                                                                                                                                                                                                                                                 |                                                                                                                                                                                                                                                                                                                                                                                                                                                                                                                              |                                                                                                                                                                                                                                                                                              |
| Other names                                                                 | Romanian Ornithological Society                                                                                                                                                                                                                                                                                             |                                                                                                                                                                                                                                                                                                                                                                                                                                                                                                                              |                                                                                                                                                                                                                                                                                              |
| Type of organisation                                                        | Nature conservation<br>Founded 1958                                                                                                                                                                                                                                                                                         |                                                                                                                                                                                                                                                                                                                                                                                                                                                                                                                              |                                                                                                                                                                                                                                                                                              |
| Coordinates                                                                 | OP 7, CP 18,<br>400370 Cluj<br><br>Fax: 0264 438 086                                                                                                                                                                                                                                                                        |                                                                                                                                                                                                                                                                                                                                                                                                                                                                                                                              |                                                                                                                                                                                                                                                                                              |
| Website                                                                     | <a href="http://www.sor.ro/">http://www.sor.ro/</a><br><a href="http://monitoring.sor.ro">http://monitoring.sor.ro</a>                                                                                                                                                                                                      |                                                                                                                                                                                                                                                                                                                                                                                                                                                                                                                              |                                                                                                                                                                                                                                                                                              |
| Funding                                                                     | 1500 members, donations                                                                                                                                                                                                                                                                                                     |                                                                                                                                                                                                                                                                                                                                                                                                                                                                                                                              |                                                                                                                                                                                                                                                                                              |
| Conflict of interest                                                        | -                                                                                                                                                                                                                                                                                                                           |                                                                                                                                                                                                                                                                                                                                                                                                                                                                                                                              |                                                                                                                                                                                                                                                                                              |
| Part of other network(s)                                                    | BirdLife International, partner since 1997                                                                                                                                                                                                                                                                                  |                                                                                                                                                                                                                                                                                                                                                                                                                                                                                                                              |                                                                                                                                                                                                                                                                                              |
| Grouping other network(s)                                                   | three offices in Cluj-Napoca, Bucharest and Tulcea, with the support of branches (14) and school groups                                                                                                                                                                                                                     |                                                                                                                                                                                                                                                                                                                                                                                                                                                                                                                              |                                                                                                                                                                                                                                                                                              |
| <b>MONITORING SUBJECT</b>                                                   |                                                                                                                                                                                                                                                                                                                             |                                                                                                                                                                                                                                                                                                                                                                                                                                                                                                                              |                                                                                                                                                                                                                                                                                              |
| Description                                                                 | Protection of birds and habitats; teaching                                                                                                                                                                                                                                                                                  |                                                                                                                                                                                                                                                                                                                                                                                                                                                                                                                              |                                                                                                                                                                                                                                                                                              |
| Protection goal(s) and/or influencing factor(s)                             | <input checked="" type="checkbox"/> Protection goal                                                                                                                                                                                                                                                                         | <input type="checkbox"/> Influencing factor                                                                                                                                                                                                                                                                                                                                                                                                                                                                                  |                                                                                                                                                                                                                                                                                              |
|                                                                             | <input checked="" type="checkbox"/> Biodiversity: Birds<br><input type="checkbox"/> Human Health<br><input type="checkbox"/> Animal Health<br><input type="checkbox"/> Plant Health<br><input type="checkbox"/> Soil function<br><input type="checkbox"/> Water quality<br><input type="checkbox"/> Sustainable Agriculture | <input type="checkbox"/> Agronomic practice<br><input type="checkbox"/> Plant protection<br><input type="checkbox"/> GMO cultivation<br><input type="checkbox"/> Environmental conditions                                                                                                                                                                                                                                                                                                                                    |                                                                                                                                                                                                                                                                                              |
| Duplication of Farmer's questionnaire                                       | <input checked="" type="checkbox"/> No duplication<br><input type="checkbox"/> Partly duplication<br><input type="checkbox"/> Complete duplication                                                                                                                                                                          |                                                                                                                                                                                                                                                                                                                                                                                                                                                                                                                              |                                                                                                                                                                                                                                                                                              |
| <b>SPECIFICITY</b>                                                          |                                                                                                                                                                                                                                                                                                                             |                                                                                                                                                                                                                                                                                                                                                                                                                                                                                                                              |                                                                                                                                                                                                                                                                                              |
| Geography                                                                   | <input type="checkbox"/> EU -wide                                                                                                                                                                                                                                                                                           |                                                                                                                                                                                                                                                                                                                                                                                                                                                                                                                              |                                                                                                                                                                                                                                                                                              |
|                                                                             | <input type="checkbox"/> Zone A – North                                                                                                                                                                                                                                                                                     | <input checked="" type="checkbox"/> Zone B – Centre:                                                                                                                                                                                                                                                                                                                                                                                                                                                                         | <input type="checkbox"/> Zone C – South                                                                                                                                                                                                                                                      |
|                                                                             | <input type="checkbox"/> Denmark,<br><input type="checkbox"/> Estonia,<br><input type="checkbox"/> Latvia,<br><input type="checkbox"/> Lithuania,<br><input type="checkbox"/> Finland,<br><input type="checkbox"/> Sweden                                                                                                   | <input type="checkbox"/> Belgium,<br><input type="checkbox"/> Czech Republic<br><input type="checkbox"/> Germany,<br><input type="checkbox"/> Ireland,<br><input type="checkbox"/> Luxembourg,<br><input type="checkbox"/> Hungary,<br><input type="checkbox"/> Netherlands,<br><input type="checkbox"/> Austria,<br><input type="checkbox"/> Poland,<br><input checked="" type="checkbox"/> Romania,<br><input type="checkbox"/> Slovenia,<br><input type="checkbox"/> Slovakia,<br><input type="checkbox"/> United Kingdom | <input type="checkbox"/> Bulgaria,<br><input type="checkbox"/> Greece,<br><input type="checkbox"/> Spain,<br><input type="checkbox"/> France,<br><input type="checkbox"/> Italy,<br><input type="checkbox"/> Cyprus,<br><input type="checkbox"/> Malta,<br><input type="checkbox"/> Portugal |
|                                                                             | <input type="checkbox"/> Regional (specify)<br><input type="checkbox"/> Local (specify)                                                                                                                                                                                                                                     |                                                                                                                                                                                                                                                                                                                                                                                                                                                                                                                              |                                                                                                                                                                                                                                                                                              |
| Factors                                                                     | <input type="checkbox"/> Multiple species/items (specify)<br><input checked="" type="checkbox"/> Single species/item (specify): birds                                                                                                                                                                                       |                                                                                                                                                                                                                                                                                                                                                                                                                                                                                                                              |                                                                                                                                                                                                                                                                                              |
| Crop                                                                        | <input checked="" type="checkbox"/> No specific crop(s)<br><input type="checkbox"/> Several crops (e.g. all cereals)<br><input type="checkbox"/> Single crop                                                                                                                                                                |                                                                                                                                                                                                                                                                                                                                                                                                                                                                                                                              |                                                                                                                                                                                                                                                                                              |
| Trait /treatment                                                            | <input checked="" type="checkbox"/> No specific traits/treatments<br><input type="checkbox"/> Several traits/treatments<br><input type="checkbox"/> Single trait/treatment                                                                                                                                                  |                                                                                                                                                                                                                                                                                                                                                                                                                                                                                                                              |                                                                                                                                                                                                                                                                                              |
| GMO                                                                         | <input checked="" type="checkbox"/> No GMO bias<br><input type="checkbox"/> GMO specific                                                                                                                                                                                                                                    |                                                                                                                                                                                                                                                                                                                                                                                                                                                                                                                              |                                                                                                                                                                                                                                                                                              |
| <b>METHODOLOGY</b>                                                          |                                                                                                                                                                                                                                                                                                                             |                                                                                                                                                                                                                                                                                                                                                                                                                                                                                                                              |                                                                                                                                                                                                                                                                                              |

|                                                                               |                                                                                                                                                                                                                                                                        |
|-------------------------------------------------------------------------------|------------------------------------------------------------------------------------------------------------------------------------------------------------------------------------------------------------------------------------------------------------------------|
| Observations                                                                  | <input checked="" type="checkbox"/> Reported, verifiable methodology<br><input type="checkbox"/> Reported, unverifiable methodology<br><input type="checkbox"/> Unknown, unverifiable methodology                                                                      |
| Frequency                                                                     | <input type="checkbox"/> > 1 time/year<br><input checked="" type="checkbox"/> 1 time/year<br><input type="checkbox"/> < 1 time/year                                                                                                                                    |
| Future                                                                        | <input checked="" type="checkbox"/> For ≥ 5 years<br><input type="checkbox"/> between 1 and 5 years<br><input type="checkbox"/> no prospect                                                                                                                            |
| Quality of performers                                                         | <input type="checkbox"/> Trained, professionals<br><input checked="" type="checkbox"/> Trained, non-professionals – training by documentation, volunteers<br><input type="checkbox"/> Uncertain or not -specified                                                      |
| Quality of data                                                               | <input checked="" type="checkbox"/> Standard recording of raw data<br><input type="checkbox"/> Free recording of raw data<br><input type="checkbox"/> Anecdotic                                                                                                        |
| Analysis                                                                      | <input checked="" type="checkbox"/> Reported, verifiable methodology<br><input type="checkbox"/> Reported, unverifiable methodology<br><input type="checkbox"/> Unknown, unverifiable methodology                                                                      |
| Quality of analysis                                                           | <input checked="" type="checkbox"/> Scientifically based<br><input type="checkbox"/> Indicative only<br><input type="checkbox"/> Unknown                                                                                                                               |
| <b>REPORTING</b>                                                              |                                                                                                                                                                                                                                                                        |
| Language                                                                      | Reporting language(s): Romanian                                                                                                                                                                                                                                        |
| Availability                                                                  | <input type="checkbox"/> Scientific publication<br><input checked="" type="checkbox"/> Official report available on the internet or in other public forum<br><input type="checkbox"/> Official report available from network<br><input type="checkbox"/> Not available |
| Frequency                                                                     | <input type="checkbox"/> ≥ 1 time/year<br><input type="checkbox"/> < 1 time/year                                                                                                                                                                                       |
| Historical reference                                                          | <input type="checkbox"/> over ≥ 5 years<br><input checked="" type="checkbox"/> between 1 and 5 years<br><input type="checkbox"/> no historical analysis                                                                                                                |
| <b>COMMENT(S)</b>                                                             |                                                                                                                                                                                                                                                                        |
| Monitoring birds as part of the Pan - European Common Bird Monitoring program |                                                                                                                                                                                                                                                                        |

## **Slovakia**

## GSEN-09-0015.00.2 SK – State Nature Conservancy

| EuropaBio's coordinated approach to General Surveillance: Existing Networks |                                                                                                                                                                                                                                                                                                                                               |                                                                                                                                                                                                                                                                                                                                                                                                                                                                                                                              |                                                                                                                                                                                                                                                                                              |
|-----------------------------------------------------------------------------|-----------------------------------------------------------------------------------------------------------------------------------------------------------------------------------------------------------------------------------------------------------------------------------------------------------------------------------------------|------------------------------------------------------------------------------------------------------------------------------------------------------------------------------------------------------------------------------------------------------------------------------------------------------------------------------------------------------------------------------------------------------------------------------------------------------------------------------------------------------------------------------|----------------------------------------------------------------------------------------------------------------------------------------------------------------------------------------------------------------------------------------------------------------------------------------------|
| <b>ORGANISATION</b>                                                         |                                                                                                                                                                                                                                                                                                                                               |                                                                                                                                                                                                                                                                                                                                                                                                                                                                                                                              |                                                                                                                                                                                                                                                                                              |
| EuropaBio reference                                                         | GS-EN-09-0015                                                                                                                                                                                                                                                                                                                                 |                                                                                                                                                                                                                                                                                                                                                                                                                                                                                                                              |                                                                                                                                                                                                                                                                                              |
| Official name of the Network                                                | Štátna ochrana prírody Slovenskej republiky                                                                                                                                                                                                                                                                                                   |                                                                                                                                                                                                                                                                                                                                                                                                                                                                                                                              |                                                                                                                                                                                                                                                                                              |
| Other names                                                                 | State Nature Conservancy of Slovak Republic, ŠOPSR                                                                                                                                                                                                                                                                                            |                                                                                                                                                                                                                                                                                                                                                                                                                                                                                                                              |                                                                                                                                                                                                                                                                                              |
| Type of organisation                                                        | Governmental                                                                                                                                                                                                                                                                                                                                  |                                                                                                                                                                                                                                                                                                                                                                                                                                                                                                                              |                                                                                                                                                                                                                                                                                              |
| Coordinates                                                                 | ŠOP SR Banská Bystrica<br>Tajovského ul. 28B<br>974 01 Banská Bystrica<br><br>Fax: 048 472 20 36                                                                                                                                                                                                                                              |                                                                                                                                                                                                                                                                                                                                                                                                                                                                                                                              |                                                                                                                                                                                                                                                                                              |
| Website                                                                     | <a href="http://www.sopsr.sk/">http://www.sopsr.sk/</a>                                                                                                                                                                                                                                                                                       |                                                                                                                                                                                                                                                                                                                                                                                                                                                                                                                              |                                                                                                                                                                                                                                                                                              |
| Funding                                                                     | Public                                                                                                                                                                                                                                                                                                                                        |                                                                                                                                                                                                                                                                                                                                                                                                                                                                                                                              |                                                                                                                                                                                                                                                                                              |
| Conflict of interest                                                        | -                                                                                                                                                                                                                                                                                                                                             |                                                                                                                                                                                                                                                                                                                                                                                                                                                                                                                              |                                                                                                                                                                                                                                                                                              |
| Part of other network(s)                                                    | Natura 2000                                                                                                                                                                                                                                                                                                                                   |                                                                                                                                                                                                                                                                                                                                                                                                                                                                                                                              |                                                                                                                                                                                                                                                                                              |
| Grouping other network(s)                                                   | regional branches                                                                                                                                                                                                                                                                                                                             |                                                                                                                                                                                                                                                                                                                                                                                                                                                                                                                              |                                                                                                                                                                                                                                                                                              |
| <b>MONITORING SUBJECT</b>                                                   |                                                                                                                                                                                                                                                                                                                                               |                                                                                                                                                                                                                                                                                                                                                                                                                                                                                                                              |                                                                                                                                                                                                                                                                                              |
| Description                                                                 | Monitoring of biodiversity, protection and conservation work.                                                                                                                                                                                                                                                                                 |                                                                                                                                                                                                                                                                                                                                                                                                                                                                                                                              |                                                                                                                                                                                                                                                                                              |
| Protection goal(s) and/or influencing factor(s)                             | <input checked="" type="checkbox"/> Protection goal                                                                                                                                                                                                                                                                                           | <input type="checkbox"/> Influencing factor                                                                                                                                                                                                                                                                                                                                                                                                                                                                                  |                                                                                                                                                                                                                                                                                              |
|                                                                             | <input checked="" type="checkbox"/> Biodiversity: mammals, birds, insects<br><input type="checkbox"/> Human Health<br><input type="checkbox"/> Animal Health<br><input type="checkbox"/> Plant Health<br><input type="checkbox"/> Soil function<br><input type="checkbox"/> Water quality<br><input type="checkbox"/> Sustainable Agriculture | <input type="checkbox"/> Agronomic practice<br><input type="checkbox"/> Plant protection<br><input type="checkbox"/> GMO cultivation<br><input type="checkbox"/> Environmental conditions                                                                                                                                                                                                                                                                                                                                    |                                                                                                                                                                                                                                                                                              |
| Duplication of Farmer's questionnaire                                       | <input checked="" type="checkbox"/> No duplication<br><input type="checkbox"/> Partly duplication<br><input type="checkbox"/> Complete duplication                                                                                                                                                                                            |                                                                                                                                                                                                                                                                                                                                                                                                                                                                                                                              |                                                                                                                                                                                                                                                                                              |
| <b>SPECIFICITY</b>                                                          |                                                                                                                                                                                                                                                                                                                                               |                                                                                                                                                                                                                                                                                                                                                                                                                                                                                                                              |                                                                                                                                                                                                                                                                                              |
| Geography                                                                   | <input type="checkbox"/> EU -wide                                                                                                                                                                                                                                                                                                             |                                                                                                                                                                                                                                                                                                                                                                                                                                                                                                                              |                                                                                                                                                                                                                                                                                              |
|                                                                             | <input type="checkbox"/> Zone A – North                                                                                                                                                                                                                                                                                                       | <input checked="" type="checkbox"/> Zone B – Centre:                                                                                                                                                                                                                                                                                                                                                                                                                                                                         | <input type="checkbox"/> Zone C – South                                                                                                                                                                                                                                                      |
|                                                                             | <input type="checkbox"/> Denmark,<br><input type="checkbox"/> Estonia,<br><input type="checkbox"/> Latvia,<br><input type="checkbox"/> Lithuania,<br><input type="checkbox"/> Finland,<br><input type="checkbox"/> Sweden                                                                                                                     | <input type="checkbox"/> Belgium,<br><input type="checkbox"/> Czech Republic<br><input type="checkbox"/> Germany,<br><input type="checkbox"/> Ireland,<br><input type="checkbox"/> Luxembourg,<br><input type="checkbox"/> Hungary,<br><input type="checkbox"/> Netherlands,<br><input type="checkbox"/> Austria,<br><input type="checkbox"/> Poland,<br><input type="checkbox"/> Romania,<br><input type="checkbox"/> Slovenia,<br><input checked="" type="checkbox"/> Slovakia,<br><input type="checkbox"/> United Kingdom | <input type="checkbox"/> Bulgaria,<br><input type="checkbox"/> Greece,<br><input type="checkbox"/> Spain,<br><input type="checkbox"/> France,<br><input type="checkbox"/> Italy,<br><input type="checkbox"/> Cyprus,<br><input type="checkbox"/> Malta,<br><input type="checkbox"/> Portugal |
|                                                                             | <input type="checkbox"/> Regional (specify)<br><input type="checkbox"/> Local (specify)                                                                                                                                                                                                                                                       |                                                                                                                                                                                                                                                                                                                                                                                                                                                                                                                              |                                                                                                                                                                                                                                                                                              |
| Factors                                                                     | <input checked="" type="checkbox"/> Multiple species/items (specify), mammals, birds, insects<br><input type="checkbox"/> Single species/item (specify)                                                                                                                                                                                       |                                                                                                                                                                                                                                                                                                                                                                                                                                                                                                                              |                                                                                                                                                                                                                                                                                              |
| Crop                                                                        | <input checked="" type="checkbox"/> No specific crop(s)<br><input type="checkbox"/> Several crops (e.g. all cereals)<br><input type="checkbox"/> Single crop                                                                                                                                                                                  |                                                                                                                                                                                                                                                                                                                                                                                                                                                                                                                              |                                                                                                                                                                                                                                                                                              |
| Trait /treatment                                                            | <input checked="" type="checkbox"/> No specific traits/treatments<br><input type="checkbox"/> Several traits/treatments<br><input type="checkbox"/> Single trait/treatment                                                                                                                                                                    |                                                                                                                                                                                                                                                                                                                                                                                                                                                                                                                              |                                                                                                                                                                                                                                                                                              |
| GMO                                                                         | <input checked="" type="checkbox"/> No GMO bias<br><input type="checkbox"/> GMO specific                                                                                                                                                                                                                                                      |                                                                                                                                                                                                                                                                                                                                                                                                                                                                                                                              |                                                                                                                                                                                                                                                                                              |
| <b>METHODOLOGY</b>                                                          |                                                                                                                                                                                                                                                                                                                                               |                                                                                                                                                                                                                                                                                                                                                                                                                                                                                                                              |                                                                                                                                                                                                                                                                                              |
| Observations                                                                | <input checked="" type="checkbox"/> Reported, verifiable methodology<br><input type="checkbox"/> Reported, unverifiable methodology                                                                                                                                                                                                           |                                                                                                                                                                                                                                                                                                                                                                                                                                                                                                                              |                                                                                                                                                                                                                                                                                              |

|                                                 |                                                                                                                                                                                                                                                                                              |
|-------------------------------------------------|----------------------------------------------------------------------------------------------------------------------------------------------------------------------------------------------------------------------------------------------------------------------------------------------|
|                                                 | <input type="checkbox"/> Unknown, unverifiable methodology                                                                                                                                                                                                                                   |
| Frequency                                       | <input checked="" type="checkbox"/> > 1 time/year<br><input type="checkbox"/> 1 time/year<br><input type="checkbox"/> < 1 time/year                                                                                                                                                          |
| Future                                          | <input checked="" type="checkbox"/> For ≥ 5 years<br><input type="checkbox"/> between 1 and 5 years<br><input type="checkbox"/> no prospect                                                                                                                                                  |
| Quality of performers                           | <input type="checkbox"/> Trained, professionals<br><input checked="" type="checkbox"/> Trained, non-professionals – training by documentation, volunteers<br><input type="checkbox"/> Uncertain or not -specified                                                                            |
| Quality of data                                 | <input checked="" type="checkbox"/> Standard recording of raw data<br><input type="checkbox"/> Free recording of raw data<br><input type="checkbox"/> Anecdotic                                                                                                                              |
| Analysis                                        | <input checked="" type="checkbox"/> Reported, verifiable methodology<br><input type="checkbox"/> Reported, unverifiable methodology<br><input type="checkbox"/> Unknown, unverifiable methodology                                                                                            |
| Quality of analysis                             | <input checked="" type="checkbox"/> Scientifically based<br><input type="checkbox"/> Indicative only<br><input type="checkbox"/> Unknown                                                                                                                                                     |
| <b>REPORTING</b>                                |                                                                                                                                                                                                                                                                                              |
| Language                                        | <input type="checkbox"/> Specify reporting language(s): Slovak, Czech or English                                                                                                                                                                                                             |
| Availability                                    | <input checked="" type="checkbox"/> Scientific publication<br><input checked="" type="checkbox"/> Official report available on the internet or in other public forum<br><input checked="" type="checkbox"/> Official report available from network<br><input type="checkbox"/> Not available |
| Frequency                                       | <input checked="" type="checkbox"/> ≥ 1 time/year – Yearly reports,<br><input type="checkbox"/> < 1 time/year – Biannual reports                                                                                                                                                             |
| Historical reference                            | <input checked="" type="checkbox"/> over ≥ 5 years<br><input type="checkbox"/> between 1 and 5 years<br><input type="checkbox"/> no historical analysis                                                                                                                                      |
| <b>COMMENT(S)</b>                               |                                                                                                                                                                                                                                                                                              |
| Network focussing on bird conservation targets. |                                                                                                                                                                                                                                                                                              |



## GSEN-09-0016.00.2 SK – UKSUP

| EuropaBio's coordinated approach to General Surveillance: Existing Networks |                                                                                                                                                                                                                                                                                                                                                                                                                            |                                                                                                                                                                                                                                                                                                                                                                                                                                                                                                                              |                                                                                                                                                                                                                                                                                              |
|-----------------------------------------------------------------------------|----------------------------------------------------------------------------------------------------------------------------------------------------------------------------------------------------------------------------------------------------------------------------------------------------------------------------------------------------------------------------------------------------------------------------|------------------------------------------------------------------------------------------------------------------------------------------------------------------------------------------------------------------------------------------------------------------------------------------------------------------------------------------------------------------------------------------------------------------------------------------------------------------------------------------------------------------------------|----------------------------------------------------------------------------------------------------------------------------------------------------------------------------------------------------------------------------------------------------------------------------------------------|
| ORGANISATION                                                                |                                                                                                                                                                                                                                                                                                                                                                                                                            |                                                                                                                                                                                                                                                                                                                                                                                                                                                                                                                              |                                                                                                                                                                                                                                                                                              |
| EuropaBio reference                                                         | GS-EN-09-0016                                                                                                                                                                                                                                                                                                                                                                                                              |                                                                                                                                                                                                                                                                                                                                                                                                                                                                                                                              |                                                                                                                                                                                                                                                                                              |
| Official name of the Network                                                | Ústredný kontrolný a skúšobný ústav poľnohospodársky                                                                                                                                                                                                                                                                                                                                                                       |                                                                                                                                                                                                                                                                                                                                                                                                                                                                                                                              |                                                                                                                                                                                                                                                                                              |
| Other names                                                                 | Central Controlling and Testing Institute: Agriculture Department of Feeds and Animal Nutrition; UKSUP                                                                                                                                                                                                                                                                                                                     |                                                                                                                                                                                                                                                                                                                                                                                                                                                                                                                              |                                                                                                                                                                                                                                                                                              |
| Type of organisation                                                        | Governmental                                                                                                                                                                                                                                                                                                                                                                                                               |                                                                                                                                                                                                                                                                                                                                                                                                                                                                                                                              |                                                                                                                                                                                                                                                                                              |
| Coordinates                                                                 | ÚKSÚP, Bratislava<br>Matúškova 21<br>833 16 Bratislava                                                                                                                                                                                                                                                                                                                                                                     |                                                                                                                                                                                                                                                                                                                                                                                                                                                                                                                              |                                                                                                                                                                                                                                                                                              |
| Website                                                                     | <a href="http://www.uksup.sk">http://www.uksup.sk</a>                                                                                                                                                                                                                                                                                                                                                                      |                                                                                                                                                                                                                                                                                                                                                                                                                                                                                                                              |                                                                                                                                                                                                                                                                                              |
| Funding                                                                     | Public                                                                                                                                                                                                                                                                                                                                                                                                                     |                                                                                                                                                                                                                                                                                                                                                                                                                                                                                                                              |                                                                                                                                                                                                                                                                                              |
| Conflict of interest                                                        | -                                                                                                                                                                                                                                                                                                                                                                                                                          |                                                                                                                                                                                                                                                                                                                                                                                                                                                                                                                              |                                                                                                                                                                                                                                                                                              |
| Part of other network(s)                                                    |                                                                                                                                                                                                                                                                                                                                                                                                                            |                                                                                                                                                                                                                                                                                                                                                                                                                                                                                                                              |                                                                                                                                                                                                                                                                                              |
| Grouping other network(s)                                                   | Different departments. Of particular relevance:<br>Department of Animal Feeds and Nutrition<br>Department of Agro Chemistry and Plant Nutrition<br>Department of Variety Testing<br>Department of Seeds and Planting Materials                                                                                                                                                                                             |                                                                                                                                                                                                                                                                                                                                                                                                                                                                                                                              |                                                                                                                                                                                                                                                                                              |
| MONITORING SUBJECT                                                          |                                                                                                                                                                                                                                                                                                                                                                                                                            |                                                                                                                                                                                                                                                                                                                                                                                                                                                                                                                              |                                                                                                                                                                                                                                                                                              |
| Description                                                                 | Monitoring of agronomic practice.                                                                                                                                                                                                                                                                                                                                                                                          |                                                                                                                                                                                                                                                                                                                                                                                                                                                                                                                              |                                                                                                                                                                                                                                                                                              |
| Protection goal(s) and/or influencing factor(s)                             | <input checked="" type="checkbox"/> Protection goal<br><input type="checkbox"/> Biodiversity: mammals, birds, insects<br><input type="checkbox"/> Human Health<br><input checked="" type="checkbox"/> Animal Health<br><input checked="" type="checkbox"/> Plant Health<br><input type="checkbox"/> Soil function<br><input type="checkbox"/> Water quality<br><input checked="" type="checkbox"/> Sustainable Agriculture | <input checked="" type="checkbox"/> Influencing factor<br><input checked="" type="checkbox"/> Agronomic practice<br><input type="checkbox"/> Plant protection<br><input type="checkbox"/> GMO cultivation<br><input type="checkbox"/> Environmental conditions                                                                                                                                                                                                                                                               |                                                                                                                                                                                                                                                                                              |
| Duplication of Farmer's questionnaire                                       | <input type="checkbox"/> No duplication<br><input checked="" type="checkbox"/> Partly duplication<br><input type="checkbox"/> Complete duplication                                                                                                                                                                                                                                                                         |                                                                                                                                                                                                                                                                                                                                                                                                                                                                                                                              |                                                                                                                                                                                                                                                                                              |
| SPECIFICITY                                                                 |                                                                                                                                                                                                                                                                                                                                                                                                                            |                                                                                                                                                                                                                                                                                                                                                                                                                                                                                                                              |                                                                                                                                                                                                                                                                                              |
| Geography                                                                   | <input type="checkbox"/> EU -wide<br><input type="checkbox"/> Zone A – North<br><input checked="" type="checkbox"/> Zone B – Centre:<br><input type="checkbox"/> Zone C – South                                                                                                                                                                                                                                            |                                                                                                                                                                                                                                                                                                                                                                                                                                                                                                                              |                                                                                                                                                                                                                                                                                              |
|                                                                             | <input type="checkbox"/> Denmark,<br><input type="checkbox"/> Estonia,<br><input type="checkbox"/> Latvia,<br><input type="checkbox"/> Lithuania,<br><input type="checkbox"/> Finland,<br><input type="checkbox"/> Sweden                                                                                                                                                                                                  | <input type="checkbox"/> Belgium,<br><input type="checkbox"/> Czech Republic<br><input type="checkbox"/> Germany,<br><input type="checkbox"/> Ireland,<br><input type="checkbox"/> Luxembourg,<br><input type="checkbox"/> Hungary,<br><input type="checkbox"/> Netherlands,<br><input type="checkbox"/> Austria,<br><input type="checkbox"/> Poland,<br><input type="checkbox"/> Romania,<br><input type="checkbox"/> Slovenia,<br><input checked="" type="checkbox"/> Slovakia,<br><input type="checkbox"/> United Kingdom | <input type="checkbox"/> Bulgaria,<br><input type="checkbox"/> Greece,<br><input type="checkbox"/> Spain,<br><input type="checkbox"/> France,<br><input type="checkbox"/> Italy,<br><input type="checkbox"/> Cyprus,<br><input type="checkbox"/> Malta,<br><input type="checkbox"/> Portugal |
|                                                                             | <input type="checkbox"/> Regional (specify)<br><input type="checkbox"/> Local (Specify)                                                                                                                                                                                                                                                                                                                                    |                                                                                                                                                                                                                                                                                                                                                                                                                                                                                                                              |                                                                                                                                                                                                                                                                                              |
| Factors                                                                     | <input checked="" type="checkbox"/> Multiple species/items (specify), agronomic indicators<br><input type="checkbox"/> Single species/item (specify)                                                                                                                                                                                                                                                                       |                                                                                                                                                                                                                                                                                                                                                                                                                                                                                                                              |                                                                                                                                                                                                                                                                                              |
| Crop                                                                        | <input checked="" type="checkbox"/> No specific crop(s)<br><input type="checkbox"/> Several crops (e.g. all cereals)<br><input type="checkbox"/> Single crop                                                                                                                                                                                                                                                               |                                                                                                                                                                                                                                                                                                                                                                                                                                                                                                                              |                                                                                                                                                                                                                                                                                              |
| Trait /treatment                                                            | <input checked="" type="checkbox"/> No specific traits/treatments<br><input type="checkbox"/> Several traits/treatments<br><input type="checkbox"/> Single trait/treatment                                                                                                                                                                                                                                                 |                                                                                                                                                                                                                                                                                                                                                                                                                                                                                                                              |                                                                                                                                                                                                                                                                                              |
| GMO                                                                         | <input checked="" type="checkbox"/> No GMO bias<br><input type="checkbox"/> GMO specific                                                                                                                                                                                                                                                                                                                                   |                                                                                                                                                                                                                                                                                                                                                                                                                                                                                                                              |                                                                                                                                                                                                                                                                                              |
| METHODOLOGY                                                                 |                                                                                                                                                                                                                                                                                                                                                                                                                            |                                                                                                                                                                                                                                                                                                                                                                                                                                                                                                                              |                                                                                                                                                                                                                                                                                              |

|                              |                                                                                                                                                                                                                                                                        |
|------------------------------|------------------------------------------------------------------------------------------------------------------------------------------------------------------------------------------------------------------------------------------------------------------------|
| Observations                 | <input type="checkbox"/> Reported, verifiable methodology<br><input type="checkbox"/> Reported, unverifiable methodology<br><input type="checkbox"/> Unknown, unverifiable methodology                                                                                 |
| Frequency                    | <input checked="" type="checkbox"/> > 1 time/year<br><input type="checkbox"/> 1 time/year<br><input type="checkbox"/> < 1 time/year                                                                                                                                    |
| Future                       | <input checked="" type="checkbox"/> For $\geq$ 5 years<br><input type="checkbox"/> between 1 and 5 years<br><input type="checkbox"/> no prospect                                                                                                                       |
| Quality of performers        | <input checked="" type="checkbox"/> Trained, professionals<br><input type="checkbox"/> Trained, non-professionals – training by documentation, volunteers<br><input type="checkbox"/> Uncertain or not -specified                                                      |
| Quality of data              | <input type="checkbox"/> Standard recording of raw data<br><input type="checkbox"/> Free recording of raw data<br><input type="checkbox"/> Anecdotic                                                                                                                   |
| Analysis                     | <input type="checkbox"/> Reported, verifiable methodology<br><input type="checkbox"/> Reported, unverifiable methodology<br><input checked="" type="checkbox"/> Unknown, unverifiable methodology                                                                      |
| Quality of analysis          | <input type="checkbox"/> Scientifically based<br><input type="checkbox"/> Indicative only<br><input checked="" type="checkbox"/> Unknown                                                                                                                               |
| <b>REPORTING</b>             |                                                                                                                                                                                                                                                                        |
| Language                     | <input type="checkbox"/> Specify reporting language(s): Slovak or English                                                                                                                                                                                              |
| Availability                 | <input type="checkbox"/> Scientific publication<br><input type="checkbox"/> Official report available on the internet or in other public forum<br><input checked="" type="checkbox"/> Official report available from network<br><input type="checkbox"/> Not available |
| Frequency                    | <input checked="" type="checkbox"/> $\geq$ 1 time/year – Yearly reports,<br><input type="checkbox"/> < 1 time/year – Biannual reports                                                                                                                                  |
| Historical reference         | <input type="checkbox"/> over $\geq$ 5 years<br><input type="checkbox"/> between 1 and 5 years<br><input type="checkbox"/> no historical analysis                                                                                                                      |
| <b>COMMENT(S)</b>            |                                                                                                                                                                                                                                                                        |
| Agronomic monitoring network |                                                                                                                                                                                                                                                                        |

## GSEN-09-0017.00.2 SK – Min Agriculture

| EuropaBio's coordinated approach to General Surveillance: Existing Networks |                                                                                                                                                                                                                                                                                                                                                                                    |                                                                                                                                                                                                                                                                                                                                                                                                                                                                                                                              |                                                                                                                                                                                                                                                                                              |
|-----------------------------------------------------------------------------|------------------------------------------------------------------------------------------------------------------------------------------------------------------------------------------------------------------------------------------------------------------------------------------------------------------------------------------------------------------------------------|------------------------------------------------------------------------------------------------------------------------------------------------------------------------------------------------------------------------------------------------------------------------------------------------------------------------------------------------------------------------------------------------------------------------------------------------------------------------------------------------------------------------------|----------------------------------------------------------------------------------------------------------------------------------------------------------------------------------------------------------------------------------------------------------------------------------------------|
| <b>ORGANISATION</b>                                                         |                                                                                                                                                                                                                                                                                                                                                                                    |                                                                                                                                                                                                                                                                                                                                                                                                                                                                                                                              |                                                                                                                                                                                                                                                                                              |
| EuropaBio reference                                                         | GS-EN-09-0017                                                                                                                                                                                                                                                                                                                                                                      |                                                                                                                                                                                                                                                                                                                                                                                                                                                                                                                              |                                                                                                                                                                                                                                                                                              |
| Official name of the Network                                                | <b>Minister pôdohospodárstva</b>                                                                                                                                                                                                                                                                                                                                                   |                                                                                                                                                                                                                                                                                                                                                                                                                                                                                                                              |                                                                                                                                                                                                                                                                                              |
| Other names                                                                 | Ministry of Agriculture: GMO location register                                                                                                                                                                                                                                                                                                                                     |                                                                                                                                                                                                                                                                                                                                                                                                                                                                                                                              |                                                                                                                                                                                                                                                                                              |
| Type of organisation                                                        | Governmental                                                                                                                                                                                                                                                                                                                                                                       |                                                                                                                                                                                                                                                                                                                                                                                                                                                                                                                              |                                                                                                                                                                                                                                                                                              |
| Coordinates                                                                 | Dobrovicova 12<br>812 66 Bratislava                                                                                                                                                                                                                                                                                                                                                |                                                                                                                                                                                                                                                                                                                                                                                                                                                                                                                              |                                                                                                                                                                                                                                                                                              |
| Website                                                                     | <a href="http://www.land.gov.sk">http://www.land.gov.sk</a>                                                                                                                                                                                                                                                                                                                        |                                                                                                                                                                                                                                                                                                                                                                                                                                                                                                                              |                                                                                                                                                                                                                                                                                              |
| Funding                                                                     | Public                                                                                                                                                                                                                                                                                                                                                                             |                                                                                                                                                                                                                                                                                                                                                                                                                                                                                                                              |                                                                                                                                                                                                                                                                                              |
| Conflict of interest                                                        | -                                                                                                                                                                                                                                                                                                                                                                                  |                                                                                                                                                                                                                                                                                                                                                                                                                                                                                                                              |                                                                                                                                                                                                                                                                                              |
| Part of other network(s)                                                    |                                                                                                                                                                                                                                                                                                                                                                                    |                                                                                                                                                                                                                                                                                                                                                                                                                                                                                                                              |                                                                                                                                                                                                                                                                                              |
| Grouping other network(s)                                                   | -                                                                                                                                                                                                                                                                                                                                                                                  |                                                                                                                                                                                                                                                                                                                                                                                                                                                                                                                              |                                                                                                                                                                                                                                                                                              |
| <b>MONITORING SUBJECT</b>                                                   |                                                                                                                                                                                                                                                                                                                                                                                    |                                                                                                                                                                                                                                                                                                                                                                                                                                                                                                                              |                                                                                                                                                                                                                                                                                              |
| Description                                                                 | The Ministry provides information on GMOs and maintains the GMO register.<br>Also, prepares the national GM strategy.                                                                                                                                                                                                                                                              |                                                                                                                                                                                                                                                                                                                                                                                                                                                                                                                              |                                                                                                                                                                                                                                                                                              |
| Protection goal(s) and/or influencing factor(s)                             | <input type="checkbox"/> Protection goal<br><br><input type="checkbox"/> Biodiversity: mammals, birds, insects<br><input type="checkbox"/> Human Health<br><input type="checkbox"/> Animal Health<br><input type="checkbox"/> Plant Health<br><input type="checkbox"/> Soil function<br><input type="checkbox"/> Water quality<br><input type="checkbox"/> Sustainable Agriculture | <input checked="" type="checkbox"/> Influencing factor<br><br><input type="checkbox"/> Agronomic practice<br><input type="checkbox"/> Plant protection<br><input checked="" type="checkbox"/> GMO cultivation<br><input type="checkbox"/> Environmental conditions                                                                                                                                                                                                                                                           |                                                                                                                                                                                                                                                                                              |
| Duplication of Farmer's questionnaire                                       | <input type="checkbox"/> No duplication<br><input checked="" type="checkbox"/> Partly duplication<br><input type="checkbox"/> Complete duplication                                                                                                                                                                                                                                 |                                                                                                                                                                                                                                                                                                                                                                                                                                                                                                                              |                                                                                                                                                                                                                                                                                              |
| <b>SPECIFICITY</b>                                                          |                                                                                                                                                                                                                                                                                                                                                                                    |                                                                                                                                                                                                                                                                                                                                                                                                                                                                                                                              |                                                                                                                                                                                                                                                                                              |
| Geography                                                                   | <input type="checkbox"/> EU -wide                                                                                                                                                                                                                                                                                                                                                  |                                                                                                                                                                                                                                                                                                                                                                                                                                                                                                                              |                                                                                                                                                                                                                                                                                              |
|                                                                             | <input type="checkbox"/> Zone A – North                                                                                                                                                                                                                                                                                                                                            | <input checked="" type="checkbox"/> Zone B – Centre:                                                                                                                                                                                                                                                                                                                                                                                                                                                                         | <input type="checkbox"/> Zone C – South                                                                                                                                                                                                                                                      |
|                                                                             | <input type="checkbox"/> Denmark,<br><input type="checkbox"/> Estonia,<br><input type="checkbox"/> Latvia,<br><input type="checkbox"/> Lithuania,<br><input type="checkbox"/> Finland,<br><input type="checkbox"/> Sweden                                                                                                                                                          | <input type="checkbox"/> Belgium,<br><input type="checkbox"/> Czech Republic<br><input type="checkbox"/> Germany,<br><input type="checkbox"/> Ireland,<br><input type="checkbox"/> Luxembourg,<br><input type="checkbox"/> Hungary,<br><input type="checkbox"/> Netherlands,<br><input type="checkbox"/> Austria,<br><input type="checkbox"/> Poland,<br><input type="checkbox"/> Romania,<br><input type="checkbox"/> Slovenia,<br><input checked="" type="checkbox"/> Slovakia,<br><input type="checkbox"/> United Kingdom | <input type="checkbox"/> Bulgaria,<br><input type="checkbox"/> Greece,<br><input type="checkbox"/> Spain,<br><input type="checkbox"/> France,<br><input type="checkbox"/> Italy,<br><input type="checkbox"/> Cyprus,<br><input type="checkbox"/> Malta,<br><input type="checkbox"/> Portugal |
|                                                                             | <input type="checkbox"/> Regional (specify)<br><input type="checkbox"/> Local (specify)                                                                                                                                                                                                                                                                                            |                                                                                                                                                                                                                                                                                                                                                                                                                                                                                                                              |                                                                                                                                                                                                                                                                                              |
| Factors                                                                     | <input checked="" type="checkbox"/> Multiple species/items (specify), all GMOs<br><input type="checkbox"/> Single species/item (specify)                                                                                                                                                                                                                                           |                                                                                                                                                                                                                                                                                                                                                                                                                                                                                                                              |                                                                                                                                                                                                                                                                                              |
| Crop                                                                        | <input checked="" type="checkbox"/> No specific crop(s)<br><input type="checkbox"/> Several crops (e.g. all cereals)<br><input type="checkbox"/> Single crop                                                                                                                                                                                                                       |                                                                                                                                                                                                                                                                                                                                                                                                                                                                                                                              |                                                                                                                                                                                                                                                                                              |
| Trait /treatment                                                            | <input checked="" type="checkbox"/> No specific traits/treatments<br><input type="checkbox"/> Several traits/treatments<br><input type="checkbox"/> Single trait/treatment                                                                                                                                                                                                         |                                                                                                                                                                                                                                                                                                                                                                                                                                                                                                                              |                                                                                                                                                                                                                                                                                              |
| GMO                                                                         | <input type="checkbox"/> No GMO bias<br><input checked="" type="checkbox"/> GMO specific                                                                                                                                                                                                                                                                                           |                                                                                                                                                                                                                                                                                                                                                                                                                                                                                                                              |                                                                                                                                                                                                                                                                                              |
| <b>METHODOLOGY</b>                                                          |                                                                                                                                                                                                                                                                                                                                                                                    |                                                                                                                                                                                                                                                                                                                                                                                                                                                                                                                              |                                                                                                                                                                                                                                                                                              |
| Observations                                                                | <input checked="" type="checkbox"/> Reported, verifiable methodology<br><input type="checkbox"/> Reported, unverifiable methodology<br><input type="checkbox"/> Unknown, unverifiable methodology                                                                                                                                                                                  |                                                                                                                                                                                                                                                                                                                                                                                                                                                                                                                              |                                                                                                                                                                                                                                                                                              |
| Frequency                                                                   | <input type="checkbox"/> > 1 time/year                                                                                                                                                                                                                                                                                                                                             |                                                                                                                                                                                                                                                                                                                                                                                                                                                                                                                              |                                                                                                                                                                                                                                                                                              |

|                                 |                                                                                                                                                                                                                                                                        |
|---------------------------------|------------------------------------------------------------------------------------------------------------------------------------------------------------------------------------------------------------------------------------------------------------------------|
|                                 | <input checked="" type="checkbox"/> 1 time/year<br><input type="checkbox"/> < 1 time/year                                                                                                                                                                              |
| Future                          | <input checked="" type="checkbox"/> For ≥ 5 years<br><input type="checkbox"/> between 1 and 5 years<br><input type="checkbox"/> no prospect                                                                                                                            |
| Quality of performers           | <input checked="" type="checkbox"/> Trained, professionals<br><input type="checkbox"/> Trained, non-professionals – training by documentation, volunteers<br><input type="checkbox"/> Uncertain or not -specified                                                      |
| Quality of data                 | <input checked="" type="checkbox"/> Standard recording of raw data<br><input type="checkbox"/> Free recording of raw data<br><input type="checkbox"/> Anecdotic                                                                                                        |
| Analysis                        | <input type="checkbox"/> Reported, verifiable methodology<br><input type="checkbox"/> Reported, unverifiable methodology<br><input type="checkbox"/> Unknown, unverifiable methodology                                                                                 |
| Quality of analysis             | <input checked="" type="checkbox"/> Scientifically based<br><input type="checkbox"/> Indicative only<br><input type="checkbox"/> Unknown                                                                                                                               |
| <b>REPORTING</b>                |                                                                                                                                                                                                                                                                        |
| Language                        | <input type="checkbox"/> Specify reporting language(s): Slovak or English                                                                                                                                                                                              |
| Availability                    | <input type="checkbox"/> Scientific publication<br><input type="checkbox"/> Official report available on the internet or in other public forum<br><input checked="" type="checkbox"/> Official report available from network<br><input type="checkbox"/> Not available |
| Frequency                       | <input type="checkbox"/> ≥ 1 time/year – Yearly reports,<br><input type="checkbox"/> < 1 time/year – Biannual reports                                                                                                                                                  |
| Historical reference            | <input type="checkbox"/> over ≥ 5 years<br><input type="checkbox"/> between 1 and 5 years<br><input type="checkbox"/> no historical analysis                                                                                                                           |
| <b>COMMENT(S)</b>               |                                                                                                                                                                                                                                                                        |
| Limited access to the register. |                                                                                                                                                                                                                                                                        |

## GSEN-09-0018.00.2 SK – Slovak Ornithology Society

| EuropaBio's coordinated approach to General Surveillance: Existing Networks |                                                                                                                                                                                                                                                                                                                                                                                                              |                                                                                                                                                                                                                                              |  |                                                                                                                                                                                                                                                                                                                                                                                                                                                                                                                                                                                      |                                                                                                                                                                                                                                                                                                                                         |
|-----------------------------------------------------------------------------|--------------------------------------------------------------------------------------------------------------------------------------------------------------------------------------------------------------------------------------------------------------------------------------------------------------------------------------------------------------------------------------------------------------|----------------------------------------------------------------------------------------------------------------------------------------------------------------------------------------------------------------------------------------------|--|--------------------------------------------------------------------------------------------------------------------------------------------------------------------------------------------------------------------------------------------------------------------------------------------------------------------------------------------------------------------------------------------------------------------------------------------------------------------------------------------------------------------------------------------------------------------------------------|-----------------------------------------------------------------------------------------------------------------------------------------------------------------------------------------------------------------------------------------------------------------------------------------------------------------------------------------|
| <b>ORGANISATION</b>                                                         |                                                                                                                                                                                                                                                                                                                                                                                                              |                                                                                                                                                                                                                                              |  |                                                                                                                                                                                                                                                                                                                                                                                                                                                                                                                                                                                      |                                                                                                                                                                                                                                                                                                                                         |
| EuropaBio reference                                                         | GS-EN-09-0018                                                                                                                                                                                                                                                                                                                                                                                                |                                                                                                                                                                                                                                              |  |                                                                                                                                                                                                                                                                                                                                                                                                                                                                                                                                                                                      |                                                                                                                                                                                                                                                                                                                                         |
| Official name of the Network                                                | Slovenská ornitologická spoločnosť                                                                                                                                                                                                                                                                                                                                                                           |                                                                                                                                                                                                                                              |  |                                                                                                                                                                                                                                                                                                                                                                                                                                                                                                                                                                                      |                                                                                                                                                                                                                                                                                                                                         |
| Other names                                                                 | SOS / BirdLife Slovakia<br>Slovak Ornithology Society                                                                                                                                                                                                                                                                                                                                                        |                                                                                                                                                                                                                                              |  |                                                                                                                                                                                                                                                                                                                                                                                                                                                                                                                                                                                      |                                                                                                                                                                                                                                                                                                                                         |
| Type of organisation                                                        | Nature conservation<br>Founded 1926 (Czechoslovak ornithological society), 1985 (Slovak ornithological society)                                                                                                                                                                                                                                                                                              |                                                                                                                                                                                                                                              |  |                                                                                                                                                                                                                                                                                                                                                                                                                                                                                                                                                                                      |                                                                                                                                                                                                                                                                                                                                         |
| Coordinates                                                                 | SOS / BirdLife Slovakia<br>41 mill folds<br>821 09 Bratislava 2<br><br>Fax: 02-554 221 86<br>Email: vtaky[at]vtaky.sk                                                                                                                                                                                                                                                                                        |                                                                                                                                                                                                                                              |  |                                                                                                                                                                                                                                                                                                                                                                                                                                                                                                                                                                                      |                                                                                                                                                                                                                                                                                                                                         |
| Website                                                                     | <a href="http://vtaky.sk/">http://vtaky.sk/</a>                                                                                                                                                                                                                                                                                                                                                              |                                                                                                                                                                                                                                              |  |                                                                                                                                                                                                                                                                                                                                                                                                                                                                                                                                                                                      |                                                                                                                                                                                                                                                                                                                                         |
| Funding                                                                     | Members, donations, advertisements in magazine "Birds"                                                                                                                                                                                                                                                                                                                                                       |                                                                                                                                                                                                                                              |  |                                                                                                                                                                                                                                                                                                                                                                                                                                                                                                                                                                                      |                                                                                                                                                                                                                                                                                                                                         |
| Conflict of interest                                                        | -                                                                                                                                                                                                                                                                                                                                                                                                            |                                                                                                                                                                                                                                              |  |                                                                                                                                                                                                                                                                                                                                                                                                                                                                                                                                                                                      |                                                                                                                                                                                                                                                                                                                                         |
| Part of other network(s)                                                    | BirdLife International (GS-EN-09-0152)                                                                                                                                                                                                                                                                                                                                                                       |                                                                                                                                                                                                                                              |  |                                                                                                                                                                                                                                                                                                                                                                                                                                                                                                                                                                                      |                                                                                                                                                                                                                                                                                                                                         |
| Grouping other network(s)                                                   | regional branches                                                                                                                                                                                                                                                                                                                                                                                            |                                                                                                                                                                                                                                              |  |                                                                                                                                                                                                                                                                                                                                                                                                                                                                                                                                                                                      |                                                                                                                                                                                                                                                                                                                                         |
| <b>MONITORING SUBJECT</b>                                                   |                                                                                                                                                                                                                                                                                                                                                                                                              |                                                                                                                                                                                                                                              |  |                                                                                                                                                                                                                                                                                                                                                                                                                                                                                                                                                                                      |                                                                                                                                                                                                                                                                                                                                         |
| Description                                                                 | Monitoring of fluctuation of bird population cooperation with the Technical University in Zvolen; part of the Pan-European Common Bird Monitoring Project.                                                                                                                                                                                                                                                   |                                                                                                                                                                                                                                              |  |                                                                                                                                                                                                                                                                                                                                                                                                                                                                                                                                                                                      |                                                                                                                                                                                                                                                                                                                                         |
| Protection goal(s) and/or influencing factor(s)                             | <input checked="" type="checkbox"/> Protection goal<br><br><input checked="" type="checkbox"/> Biodiversity: Birds<br><input type="checkbox"/> Human Health<br><input type="checkbox"/> Animal Health<br><input type="checkbox"/> Plant Health<br><input type="checkbox"/> Soil function<br><input type="checkbox"/> Water quality<br><input type="checkbox"/> Sustainable Agriculture                       | <input type="checkbox"/> Influencing factor<br><br><input type="checkbox"/> Agronomic practice<br><input type="checkbox"/> Plant protection<br><input type="checkbox"/> GMO cultivation<br><input type="checkbox"/> Environmental conditions |  |                                                                                                                                                                                                                                                                                                                                                                                                                                                                                                                                                                                      |                                                                                                                                                                                                                                                                                                                                         |
| Duplication of Farmer's questionnaire                                       | <input checked="" type="checkbox"/> No duplication<br><input type="checkbox"/> Partly duplication<br><input type="checkbox"/> Complete duplication                                                                                                                                                                                                                                                           |                                                                                                                                                                                                                                              |  |                                                                                                                                                                                                                                                                                                                                                                                                                                                                                                                                                                                      |                                                                                                                                                                                                                                                                                                                                         |
| <b>SPECIFICITY</b>                                                          |                                                                                                                                                                                                                                                                                                                                                                                                              |                                                                                                                                                                                                                                              |  |                                                                                                                                                                                                                                                                                                                                                                                                                                                                                                                                                                                      |                                                                                                                                                                                                                                                                                                                                         |
| Geography                                                                   | <input type="checkbox"/> EU -wide<br><br><input type="checkbox"/> Zone A – North<br><input type="checkbox"/> Denmark,<br><input type="checkbox"/> Estonia,<br><input type="checkbox"/> Latvia,<br><input type="checkbox"/> Lithuania,<br><input type="checkbox"/> Finland,<br><input type="checkbox"/> Sweden<br><br><input type="checkbox"/> Regional (specify)<br><input type="checkbox"/> Local (specify) |                                                                                                                                                                                                                                              |  | <input checked="" type="checkbox"/> Zone B – Centre:<br><input type="checkbox"/> Belgium,<br><input type="checkbox"/> Czech Republic<br><input type="checkbox"/> Germany,<br><input type="checkbox"/> Ireland,<br><input type="checkbox"/> Luxembourg,<br><input type="checkbox"/> Hungary,<br><input type="checkbox"/> Netherlands,<br><input type="checkbox"/> Austria,<br><input type="checkbox"/> Poland,<br><input type="checkbox"/> Romania,<br><input type="checkbox"/> Slovenia,<br><input checked="" type="checkbox"/> Slovakia,<br><input type="checkbox"/> United Kingdom | <input type="checkbox"/> Zone C – South<br><input type="checkbox"/> Bulgaria,<br><input type="checkbox"/> Greece,<br><input type="checkbox"/> Spain,<br><input type="checkbox"/> France,<br><input type="checkbox"/> Italy,<br><input type="checkbox"/> Cyprus,<br><input type="checkbox"/> Malta,<br><input type="checkbox"/> Portugal |
| Factors                                                                     | <input checked="" type="checkbox"/> Multiple species/items (specify) birds<br><input type="checkbox"/> Single species/item (specify)                                                                                                                                                                                                                                                                         |                                                                                                                                                                                                                                              |  |                                                                                                                                                                                                                                                                                                                                                                                                                                                                                                                                                                                      |                                                                                                                                                                                                                                                                                                                                         |
| Crop                                                                        | <input checked="" type="checkbox"/> No specific crop(s)<br><input type="checkbox"/> Several crops (e.g. all cereals)<br><input type="checkbox"/> Single crop                                                                                                                                                                                                                                                 |                                                                                                                                                                                                                                              |  |                                                                                                                                                                                                                                                                                                                                                                                                                                                                                                                                                                                      |                                                                                                                                                                                                                                                                                                                                         |
| Trait /treatment                                                            | <input checked="" type="checkbox"/> No specific traits/treatments<br><input type="checkbox"/> Several traits/treatments<br><input type="checkbox"/> Single trait/treatment                                                                                                                                                                                                                                   |                                                                                                                                                                                                                                              |  |                                                                                                                                                                                                                                                                                                                                                                                                                                                                                                                                                                                      |                                                                                                                                                                                                                                                                                                                                         |
| GMO                                                                         | <input checked="" type="checkbox"/> No GMO bias                                                                                                                                                                                                                                                                                                                                                              |                                                                                                                                                                                                                                              |  |                                                                                                                                                                                                                                                                                                                                                                                                                                                                                                                                                                                      |                                                                                                                                                                                                                                                                                                                                         |

|                                                                                            |                                                                                                                                                                                                                                                                                              |
|--------------------------------------------------------------------------------------------|----------------------------------------------------------------------------------------------------------------------------------------------------------------------------------------------------------------------------------------------------------------------------------------------|
|                                                                                            | <input type="checkbox"/> GMO specific                                                                                                                                                                                                                                                        |
| <b>METHODOLOGY</b>                                                                         |                                                                                                                                                                                                                                                                                              |
| Observations                                                                               | <input checked="" type="checkbox"/> Reported, verifiable methodology<br><input type="checkbox"/> Reported, unverifiable methodology<br><input type="checkbox"/> Unknown, unverifiable methodology                                                                                            |
| Frequency                                                                                  | <input checked="" type="checkbox"/> > 1 time/year<br><input type="checkbox"/> 1 time/year<br><input type="checkbox"/> < 1 time/year                                                                                                                                                          |
| Future                                                                                     | <input checked="" type="checkbox"/> For ≥ 5 years<br><input type="checkbox"/> between 1 and 5 years<br><input type="checkbox"/> no prospect                                                                                                                                                  |
| Quality of performers                                                                      | <input type="checkbox"/> Trained, professionals<br><input checked="" type="checkbox"/> Trained, non-professionals – training by documentation, volunteers<br><input type="checkbox"/> Uncertain or not -specified                                                                            |
| Quality of data                                                                            | <input checked="" type="checkbox"/> Standard recording of raw data<br><input type="checkbox"/> Free recording of raw data<br><input type="checkbox"/> Anecdotic                                                                                                                              |
| Analysis                                                                                   | <input checked="" type="checkbox"/> Reported, verifiable methodology<br><input type="checkbox"/> Reported, unverifiable methodology<br><input type="checkbox"/> Unknown, unverifiable methodology                                                                                            |
| Quality of analysis                                                                        | <input checked="" type="checkbox"/> Scientifically based<br><input type="checkbox"/> Indicative only<br><input type="checkbox"/> Unknown                                                                                                                                                     |
| <b>REPORTING</b>                                                                           |                                                                                                                                                                                                                                                                                              |
| Language                                                                                   | <input type="checkbox"/> Specify reporting language(s): Slovak, Czech or English                                                                                                                                                                                                             |
| Availability                                                                               | <input checked="" type="checkbox"/> Scientific publication<br><input checked="" type="checkbox"/> Official report available on the internet or in other public forum<br><input checked="" type="checkbox"/> Official report available from network<br><input type="checkbox"/> Not available |
| Frequency                                                                                  | <input checked="" type="checkbox"/> ≥ 1 time/year – Yearly reports, periodical "Birds", "Journal of Ornithology"<br><input type="checkbox"/> < 1 time/year – Biannual reports                                                                                                                |
| Historical reference                                                                       | <input checked="" type="checkbox"/> over ≥ 5 years<br><input type="checkbox"/> between 1 and 5 years<br><input type="checkbox"/> no historical analysis                                                                                                                                      |
| <b>COMMENT(S)</b>                                                                          |                                                                                                                                                                                                                                                                                              |
| Network using important bird species as representative indicators and as protection goals. |                                                                                                                                                                                                                                                                                              |

## GSEN-09-0019.00.2 SK – Hydrometeorological Institute

| EuropaBio's coordinated approach to General Surveillance: Existing Networks |                                                                                                                                                                                                                                                                                                                                                                                      |                                                                                                                                                                                                                                                                                                                                                                                                                                                                                                                   |                                                                                                                                                                                                                                                                                              |
|-----------------------------------------------------------------------------|--------------------------------------------------------------------------------------------------------------------------------------------------------------------------------------------------------------------------------------------------------------------------------------------------------------------------------------------------------------------------------------|-------------------------------------------------------------------------------------------------------------------------------------------------------------------------------------------------------------------------------------------------------------------------------------------------------------------------------------------------------------------------------------------------------------------------------------------------------------------------------------------------------------------|----------------------------------------------------------------------------------------------------------------------------------------------------------------------------------------------------------------------------------------------------------------------------------------------|
| <b>ORGANISATION</b>                                                         |                                                                                                                                                                                                                                                                                                                                                                                      |                                                                                                                                                                                                                                                                                                                                                                                                                                                                                                                   |                                                                                                                                                                                                                                                                                              |
| EuropaBio reference                                                         | GS-EN-09-0019                                                                                                                                                                                                                                                                                                                                                                        |                                                                                                                                                                                                                                                                                                                                                                                                                                                                                                                   |                                                                                                                                                                                                                                                                                              |
| Official name of the Network                                                | Slovenský hydrometeorologický ústav                                                                                                                                                                                                                                                                                                                                                  |                                                                                                                                                                                                                                                                                                                                                                                                                                                                                                                   |                                                                                                                                                                                                                                                                                              |
| Other names                                                                 | Slovak Hydrometeorological Institute; SHMU                                                                                                                                                                                                                                                                                                                                           |                                                                                                                                                                                                                                                                                                                                                                                                                                                                                                                   |                                                                                                                                                                                                                                                                                              |
| Type of organisation                                                        | Governmental                                                                                                                                                                                                                                                                                                                                                                         |                                                                                                                                                                                                                                                                                                                                                                                                                                                                                                                   |                                                                                                                                                                                                                                                                                              |
| Coordinates                                                                 | Jeséniova 17,<br>833 15 Bratislava<br><br>Fax: +421 (0) 2 54 774 593                                                                                                                                                                                                                                                                                                                 |                                                                                                                                                                                                                                                                                                                                                                                                                                                                                                                   |                                                                                                                                                                                                                                                                                              |
| Website                                                                     | <a href="http://www.shmu.sk/">http://www.shmu.sk/</a>                                                                                                                                                                                                                                                                                                                                |                                                                                                                                                                                                                                                                                                                                                                                                                                                                                                                   |                                                                                                                                                                                                                                                                                              |
| Funding                                                                     | Public                                                                                                                                                                                                                                                                                                                                                                               |                                                                                                                                                                                                                                                                                                                                                                                                                                                                                                                   |                                                                                                                                                                                                                                                                                              |
| Conflict of interest                                                        | -                                                                                                                                                                                                                                                                                                                                                                                    |                                                                                                                                                                                                                                                                                                                                                                                                                                                                                                                   |                                                                                                                                                                                                                                                                                              |
| Part of other network(s)                                                    | -                                                                                                                                                                                                                                                                                                                                                                                    |                                                                                                                                                                                                                                                                                                                                                                                                                                                                                                                   |                                                                                                                                                                                                                                                                                              |
| Grouping other network(s)                                                   |                                                                                                                                                                                                                                                                                                                                                                                      |                                                                                                                                                                                                                                                                                                                                                                                                                                                                                                                   |                                                                                                                                                                                                                                                                                              |
| <b>MONITORING SUBJECT</b>                                                   |                                                                                                                                                                                                                                                                                                                                                                                      |                                                                                                                                                                                                                                                                                                                                                                                                                                                                                                                   |                                                                                                                                                                                                                                                                                              |
| Description                                                                 | monitoring of water and air, including water quality, meteorological characteristics of the atmosphere, air pollution and environmental radioactivity                                                                                                                                                                                                                                |                                                                                                                                                                                                                                                                                                                                                                                                                                                                                                                   |                                                                                                                                                                                                                                                                                              |
| Protection goal(s) and/or Influencing factor (s)                            | <input checked="" type="checkbox"/> Protection goal<br><input type="checkbox"/> Biodiversity: general<br><input type="checkbox"/> Human Health<br><input type="checkbox"/> Animal Health<br><input type="checkbox"/> Plant Health<br><input type="checkbox"/> Soil function<br><input checked="" type="checkbox"/> Water quality<br><input type="checkbox"/> Sustainable Agriculture | <input checked="" type="checkbox"/> Influencing factor<br><input type="checkbox"/> Agronomic practice<br><input type="checkbox"/> Plant protection<br><input type="checkbox"/> GMO cultivation<br><input checked="" type="checkbox"/> Environmental conditions                                                                                                                                                                                                                                                    |                                                                                                                                                                                                                                                                                              |
| Duplication of Farmer's questionnaire                                       | <input checked="" type="checkbox"/> No duplication<br><input checked="" type="checkbox"/> Partly duplication<br><input type="checkbox"/> Complete duplication                                                                                                                                                                                                                        |                                                                                                                                                                                                                                                                                                                                                                                                                                                                                                                   |                                                                                                                                                                                                                                                                                              |
| <b>SPECIFICITY</b>                                                          |                                                                                                                                                                                                                                                                                                                                                                                      |                                                                                                                                                                                                                                                                                                                                                                                                                                                                                                                   |                                                                                                                                                                                                                                                                                              |
| Geography                                                                   | <input type="checkbox"/> EU -wide<br><input type="checkbox"/> Zone A – North<br><input type="checkbox"/> Zone B – Centre<br><input type="checkbox"/> Zone C – South<br><input type="checkbox"/> Regional (specify)<br><input type="checkbox"/> Local (specify)                                                                                                                       |                                                                                                                                                                                                                                                                                                                                                                                                                                                                                                                   |                                                                                                                                                                                                                                                                                              |
|                                                                             | <input type="checkbox"/> Denmark,<br><input type="checkbox"/> Estonia,<br><input type="checkbox"/> Latvia,<br><input type="checkbox"/> Lithuania,<br><input type="checkbox"/> Finland,<br><input type="checkbox"/> Sweden                                                                                                                                                            | <input type="checkbox"/> Belgium,<br><input type="checkbox"/> Czech Republic<br><input type="checkbox"/> Germany,<br><input type="checkbox"/> Ireland,<br><input type="checkbox"/> Luxembourg,<br><input type="checkbox"/> Hungary,<br><input type="checkbox"/> Netherlands,<br><input type="checkbox"/> Austria,<br><input type="checkbox"/> Poland,<br><input type="checkbox"/> Romania,<br><input type="checkbox"/> Slovenia,<br><input type="checkbox"/> Slovakia,<br><input type="checkbox"/> United Kingdom | <input type="checkbox"/> Bulgaria,<br><input type="checkbox"/> Greece,<br><input type="checkbox"/> Spain,<br><input type="checkbox"/> France,<br><input type="checkbox"/> Italy,<br><input type="checkbox"/> Cyprus,<br><input type="checkbox"/> Malta,<br><input type="checkbox"/> Portugal |
| Factors                                                                     | <input checked="" type="checkbox"/> Multiple species/items (specify): temperature, rain, water quality<br><input type="checkbox"/> Single species/item (specify)                                                                                                                                                                                                                     |                                                                                                                                                                                                                                                                                                                                                                                                                                                                                                                   |                                                                                                                                                                                                                                                                                              |
| Crop                                                                        | <input checked="" type="checkbox"/> No specific crop(s)<br><input type="checkbox"/> Several crops (e.g. all cereals)<br><input type="checkbox"/> Single crop                                                                                                                                                                                                                         |                                                                                                                                                                                                                                                                                                                                                                                                                                                                                                                   |                                                                                                                                                                                                                                                                                              |
| Trait /treatment                                                            | <input checked="" type="checkbox"/> No specific traits/treatments<br><input type="checkbox"/> Several traits/treatments<br><input type="checkbox"/> Single trait/treatment                                                                                                                                                                                                           |                                                                                                                                                                                                                                                                                                                                                                                                                                                                                                                   |                                                                                                                                                                                                                                                                                              |
| GMO                                                                         | <input checked="" type="checkbox"/> No GMO bias<br><input type="checkbox"/> GMO specific                                                                                                                                                                                                                                                                                             |                                                                                                                                                                                                                                                                                                                                                                                                                                                                                                                   |                                                                                                                                                                                                                                                                                              |
| <b>METHODOLOGY</b>                                                          |                                                                                                                                                                                                                                                                                                                                                                                      |                                                                                                                                                                                                                                                                                                                                                                                                                                                                                                                   |                                                                                                                                                                                                                                                                                              |
| Observations                                                                | <input type="checkbox"/> Reported, verifiable methodology<br><input type="checkbox"/> Reported, unverifiable methodology<br><input checked="" type="checkbox"/> Unknown, unverifiable methodology                                                                                                                                                                                    |                                                                                                                                                                                                                                                                                                                                                                                                                                                                                                                   |                                                                                                                                                                                                                                                                                              |

|                          |                                                                                                                                                                                                                                                             |
|--------------------------|-------------------------------------------------------------------------------------------------------------------------------------------------------------------------------------------------------------------------------------------------------------|
| Frequency                | <input type="checkbox"/> > 1 time/year<br><input type="checkbox"/> 1 time/year<br><input type="checkbox"/> < 1 time/year                                                                                                                                    |
| Future                   | <input type="checkbox"/> For ≥ 5 years<br><input type="checkbox"/> between 1 and 5 years<br><input type="checkbox"/> no prospect                                                                                                                            |
| Quality of performers    | <input type="checkbox"/> Trained, professionals<br><input type="checkbox"/> Trained, non-professionals – training by documentation, volunteers<br><input type="checkbox"/> Uncertain or not -specified                                                      |
| Quality of data          | <input type="checkbox"/> Standard recording of raw data<br><input type="checkbox"/> Free recording of raw data<br><input type="checkbox"/> Anecdotic                                                                                                        |
| Analysis                 | <input type="checkbox"/> Reported, verifiable methodology<br><input type="checkbox"/> Reported, unverifiable methodology<br><input type="checkbox"/> Unknown, unverifiable methodology                                                                      |
| Quality of analysis      | <input type="checkbox"/> Scientifically based<br><input type="checkbox"/> Indicative only<br><input type="checkbox"/> Unknown                                                                                                                               |
| <b>REPORTING</b>         |                                                                                                                                                                                                                                                             |
| Language                 | Reporting language(s): Czech                                                                                                                                                                                                                                |
| Availability             | <input type="checkbox"/> Scientific publication<br><input type="checkbox"/> Official report available on the internet or in other public forum<br><input type="checkbox"/> Official report available from network<br><input type="checkbox"/> Not available |
| Frequency                | <input type="checkbox"/> ≥ 1 time/year – bulletins on several topics<br><input type="checkbox"/> < 1 time/year – review reports over several years                                                                                                          |
| Historical reference     | <input checked="" type="checkbox"/> over ≥ 5 years<br><input type="checkbox"/> between 1 and 5 years<br><input type="checkbox"/> no historical analysis                                                                                                     |
| <b>COMMENT(S)</b>        |                                                                                                                                                                                                                                                             |
| No reporting on website. |                                                                                                                                                                                                                                                             |



## GSEN-09-0020.00.2 SK – Centre for Animal Research

| EuropaBio's coordinated approach to General Surveillance: Existing Networks |                                                                                                                                                                                                                                                                                                                                                                                                                                       |                                                                                                                                                                                                                                                                                                                                                                                                                                                                                                                              |                                                                                                                                                                                                                                                                                              |
|-----------------------------------------------------------------------------|---------------------------------------------------------------------------------------------------------------------------------------------------------------------------------------------------------------------------------------------------------------------------------------------------------------------------------------------------------------------------------------------------------------------------------------|------------------------------------------------------------------------------------------------------------------------------------------------------------------------------------------------------------------------------------------------------------------------------------------------------------------------------------------------------------------------------------------------------------------------------------------------------------------------------------------------------------------------------|----------------------------------------------------------------------------------------------------------------------------------------------------------------------------------------------------------------------------------------------------------------------------------------------|
| <b>ORGANISATION</b>                                                         |                                                                                                                                                                                                                                                                                                                                                                                                                                       |                                                                                                                                                                                                                                                                                                                                                                                                                                                                                                                              |                                                                                                                                                                                                                                                                                              |
| EuropaBio reference                                                         | GS-EN-09-0020                                                                                                                                                                                                                                                                                                                                                                                                                         |                                                                                                                                                                                                                                                                                                                                                                                                                                                                                                                              |                                                                                                                                                                                                                                                                                              |
| Official name of the Network                                                | <b>Centrum výskumu živočíšnej výroby Nitra</b><br>Ústav včelárstva Liptovský Hrádok                                                                                                                                                                                                                                                                                                                                                   |                                                                                                                                                                                                                                                                                                                                                                                                                                                                                                                              |                                                                                                                                                                                                                                                                                              |
| Other names                                                                 | Centre of Animal Research: Apiculture Institute<br>Animal Production Research Centre Nitra, VUZV<br>Department of beekeeping Liptovsky Hradok                                                                                                                                                                                                                                                                                         |                                                                                                                                                                                                                                                                                                                                                                                                                                                                                                                              |                                                                                                                                                                                                                                                                                              |
| Type of organisation                                                        | Governmental                                                                                                                                                                                                                                                                                                                                                                                                                          |                                                                                                                                                                                                                                                                                                                                                                                                                                                                                                                              |                                                                                                                                                                                                                                                                                              |
| Coordinates                                                                 | Hlohovecký 2<br>951 41 Lužianky                                                                                                                                                                                                                                                                                                                                                                                                       |                                                                                                                                                                                                                                                                                                                                                                                                                                                                                                                              |                                                                                                                                                                                                                                                                                              |
| Website                                                                     | <a href="http://www.cvzv.sk/">http://www.cvzv.sk/</a><br><a href="http://www.cvzv.sk/index.php/sk/ustavy/50">http://www.cvzv.sk/index.php/sk/ustavy/50</a>                                                                                                                                                                                                                                                                            |                                                                                                                                                                                                                                                                                                                                                                                                                                                                                                                              |                                                                                                                                                                                                                                                                                              |
| Funding                                                                     | Research projects, services, products for beekeepers                                                                                                                                                                                                                                                                                                                                                                                  |                                                                                                                                                                                                                                                                                                                                                                                                                                                                                                                              |                                                                                                                                                                                                                                                                                              |
| Conflict of interest                                                        | -                                                                                                                                                                                                                                                                                                                                                                                                                                     |                                                                                                                                                                                                                                                                                                                                                                                                                                                                                                                              |                                                                                                                                                                                                                                                                                              |
| Part of other network(s)                                                    | -                                                                                                                                                                                                                                                                                                                                                                                                                                     |                                                                                                                                                                                                                                                                                                                                                                                                                                                                                                                              |                                                                                                                                                                                                                                                                                              |
| Grouping other network(s)                                                   | Several dept., of specific interest:<br>Department of beekeeping Liptovsky Hradok                                                                                                                                                                                                                                                                                                                                                     |                                                                                                                                                                                                                                                                                                                                                                                                                                                                                                                              |                                                                                                                                                                                                                                                                                              |
| <b>MONITORING SUBJECT</b>                                                   |                                                                                                                                                                                                                                                                                                                                                                                                                                       |                                                                                                                                                                                                                                                                                                                                                                                                                                                                                                                              |                                                                                                                                                                                                                                                                                              |
| Description                                                                 | No systematic monitoring. The Institute has several activities including:<br>- Addressing the effective use of honeybee pollinators at work and landscaping, assessing the proportion of bees in increasing the yield entomophilous crops grown in an alternative way in comparison with commercial systems.<br>- Impact of agrochemicals on honey bees and other beneficial insects.<br>The institute also tests GMO silage for cows |                                                                                                                                                                                                                                                                                                                                                                                                                                                                                                                              |                                                                                                                                                                                                                                                                                              |
| Protection goal(s) and/or Influencing factor (s)                            | <input checked="" type="checkbox"/> Protection goal<br><br><input checked="" type="checkbox"/> Biodiversity: insects<br><input type="checkbox"/> Human Health<br><input type="checkbox"/> Animal Health<br><input type="checkbox"/> Plant Health<br><input type="checkbox"/> Soil function<br><input type="checkbox"/> Water quality<br><input type="checkbox"/> Sustainable Agriculture                                              | <input type="checkbox"/> Influencing factor<br><br><input type="checkbox"/> Agronomic practice<br><input type="checkbox"/> Plant protection<br><input type="checkbox"/> GMO cultivation<br><input type="checkbox"/> Environmental conditions                                                                                                                                                                                                                                                                                 |                                                                                                                                                                                                                                                                                              |
| Duplication of Farmer's questionnaire                                       | <input checked="" type="checkbox"/> No duplication<br><input type="checkbox"/> Partly duplication<br><input type="checkbox"/> Complete duplication                                                                                                                                                                                                                                                                                    |                                                                                                                                                                                                                                                                                                                                                                                                                                                                                                                              |                                                                                                                                                                                                                                                                                              |
| <b>SPECIFICITY</b>                                                          |                                                                                                                                                                                                                                                                                                                                                                                                                                       |                                                                                                                                                                                                                                                                                                                                                                                                                                                                                                                              |                                                                                                                                                                                                                                                                                              |
| Geography                                                                   | <input type="checkbox"/> EU -wide<br><br><input type="checkbox"/> Zone A – North<br><input type="checkbox"/> Zone B – Centre<br><input type="checkbox"/> Zone C – South                                                                                                                                                                                                                                                               |                                                                                                                                                                                                                                                                                                                                                                                                                                                                                                                              |                                                                                                                                                                                                                                                                                              |
|                                                                             | <input type="checkbox"/> Denmark,<br><input type="checkbox"/> Estonia,<br><input type="checkbox"/> Latvia,<br><input type="checkbox"/> Lithuania,<br><input type="checkbox"/> Finland,<br><input type="checkbox"/> Sweden                                                                                                                                                                                                             | <input type="checkbox"/> Belgium,<br><input type="checkbox"/> Czech Republic<br><input type="checkbox"/> Germany,<br><input type="checkbox"/> Ireland,<br><input type="checkbox"/> Luxembourg,<br><input type="checkbox"/> Hungary,<br><input type="checkbox"/> Netherlands,<br><input type="checkbox"/> Austria,<br><input type="checkbox"/> Poland,<br><input type="checkbox"/> Romania,<br><input type="checkbox"/> Slovenia,<br><input checked="" type="checkbox"/> Slovakia,<br><input type="checkbox"/> United Kingdom | <input type="checkbox"/> Bulgaria,<br><input type="checkbox"/> Greece,<br><input type="checkbox"/> Spain,<br><input type="checkbox"/> France,<br><input type="checkbox"/> Italy,<br><input type="checkbox"/> Cyprus,<br><input type="checkbox"/> Malta,<br><input type="checkbox"/> Portugal |
|                                                                             | <input type="checkbox"/> Regional (specify)<br><input type="checkbox"/> Local (specify)                                                                                                                                                                                                                                                                                                                                               |                                                                                                                                                                                                                                                                                                                                                                                                                                                                                                                              |                                                                                                                                                                                                                                                                                              |
| Factors                                                                     | <input type="checkbox"/> Multiple species/items (specify):<br><input type="checkbox"/> Single species/item (specify)                                                                                                                                                                                                                                                                                                                  |                                                                                                                                                                                                                                                                                                                                                                                                                                                                                                                              |                                                                                                                                                                                                                                                                                              |
| Crop                                                                        | <input checked="" type="checkbox"/> No specific crop(s)<br><input type="checkbox"/> Several crops (e.g. all cereals)<br><input type="checkbox"/> Single crop                                                                                                                                                                                                                                                                          |                                                                                                                                                                                                                                                                                                                                                                                                                                                                                                                              |                                                                                                                                                                                                                                                                                              |
| Trait /treatment                                                            | <input checked="" type="checkbox"/> No specific traits/treatments<br><input type="checkbox"/> Several traits/treatments<br><input type="checkbox"/> Single trait/treatment                                                                                                                                                                                                                                                            |                                                                                                                                                                                                                                                                                                                                                                                                                                                                                                                              |                                                                                                                                                                                                                                                                                              |

|                         |                                                                                                                                                                                                                                                             |
|-------------------------|-------------------------------------------------------------------------------------------------------------------------------------------------------------------------------------------------------------------------------------------------------------|
| GMO                     | <input checked="" type="checkbox"/> No GMO bias<br><input type="checkbox"/> GMO specific                                                                                                                                                                    |
| <b>METHODOLOGY</b>      |                                                                                                                                                                                                                                                             |
| Observations            | <input type="checkbox"/> Reported, verifiable methodology<br><input type="checkbox"/> Reported, unverifiable methodology<br><input checked="" type="checkbox"/> Unknown, unverifiable methodology                                                           |
| Frequency               | <input type="checkbox"/> > 1 time/year<br><input type="checkbox"/> 1 time/year<br><input type="checkbox"/> < 1 time/year                                                                                                                                    |
| Future                  | <input type="checkbox"/> For ≥ 5 years<br><input type="checkbox"/> between 1 and 5 years<br><input type="checkbox"/> no prospect                                                                                                                            |
| Quality of performers   | <input type="checkbox"/> Trained, professionals<br><input type="checkbox"/> Trained, non-professionals – training by documentation, volunteers<br><input type="checkbox"/> Uncertain or not -specified                                                      |
| Quality of data         | <input type="checkbox"/> Standard recording of raw data<br><input type="checkbox"/> Free recording of raw data<br><input type="checkbox"/> Anecdotic                                                                                                        |
| Analysis                | <input type="checkbox"/> Reported, verifiable methodology<br><input type="checkbox"/> Reported, unverifiable methodology<br><input type="checkbox"/> Unknown, unverifiable methodology                                                                      |
| Quality of analysis     | <input type="checkbox"/> Scientifically based<br><input type="checkbox"/> Indicative only<br><input type="checkbox"/> Unknown                                                                                                                               |
| <b>REPORTING</b>        |                                                                                                                                                                                                                                                             |
| Language                | Reporting language(s): Slovak                                                                                                                                                                                                                               |
| Availability            | <input type="checkbox"/> Scientific publication<br><input type="checkbox"/> Official report available on the internet or in other public forum<br><input type="checkbox"/> Official report available from network<br><input type="checkbox"/> Not available |
| Frequency               | <input type="checkbox"/> ≥ 1 time/year – bulletins on several topics<br><input type="checkbox"/> < 1 time/year – review reports over several years                                                                                                          |
| Historical reference    | <input checked="" type="checkbox"/> over ≥ 5 years<br><input type="checkbox"/> between 1 and 5 years<br><input type="checkbox"/> no historical analysis                                                                                                     |
| <b>COMMENT(S)</b>       |                                                                                                                                                                                                                                                             |
| No reporting on website |                                                                                                                                                                                                                                                             |

## GSEN-09-0021.00.2 SK – Lepidopteran Society

| EuropaBio's coordinated approach to General Surveillance: Existing Networks |                                                                                                                                                                                                                                                                                                                                                                                              |                                                                                                                                                                                                                                                                                                                                                                                                                                                                                                                               |                                                                                                                                                                                                                                                                                              |
|-----------------------------------------------------------------------------|----------------------------------------------------------------------------------------------------------------------------------------------------------------------------------------------------------------------------------------------------------------------------------------------------------------------------------------------------------------------------------------------|-------------------------------------------------------------------------------------------------------------------------------------------------------------------------------------------------------------------------------------------------------------------------------------------------------------------------------------------------------------------------------------------------------------------------------------------------------------------------------------------------------------------------------|----------------------------------------------------------------------------------------------------------------------------------------------------------------------------------------------------------------------------------------------------------------------------------------------|
| <b>ORGANISATION</b>                                                         |                                                                                                                                                                                                                                                                                                                                                                                              |                                                                                                                                                                                                                                                                                                                                                                                                                                                                                                                               |                                                                                                                                                                                                                                                                                              |
| EuropaBio reference                                                         | GS-EN-09-0021                                                                                                                                                                                                                                                                                                                                                                                |                                                                                                                                                                                                                                                                                                                                                                                                                                                                                                                               |                                                                                                                                                                                                                                                                                              |
| Official name of the Network                                                | <b>Motýle Slovenska</b>                                                                                                                                                                                                                                                                                                                                                                      |                                                                                                                                                                                                                                                                                                                                                                                                                                                                                                                               |                                                                                                                                                                                                                                                                                              |
| Other names                                                                 | Lepidopteran Society of Slovakia, ISTB                                                                                                                                                                                                                                                                                                                                                       |                                                                                                                                                                                                                                                                                                                                                                                                                                                                                                                               |                                                                                                                                                                                                                                                                                              |
| Type of organisation                                                        | Nature conservation<br>Founded (unknown), butterfly mapping started in 2008.                                                                                                                                                                                                                                                                                                                 |                                                                                                                                                                                                                                                                                                                                                                                                                                                                                                                               |                                                                                                                                                                                                                                                                                              |
| Coordinates                                                                 | Institute of Landscape Ecology SAS,<br>Štefánikova 3,<br>POBox 254,<br>814 99 Bratislava<br><br>Email: info[at]lepidoptera.sk                                                                                                                                                                                                                                                                |                                                                                                                                                                                                                                                                                                                                                                                                                                                                                                                               |                                                                                                                                                                                                                                                                                              |
| Website                                                                     | <a href="http://www.lepidoptera.sk/">http://www.lepidoptera.sk/</a><br><a href="http://www.soprs.sk/istb/">http://www.soprs.sk/istb/</a>                                                                                                                                                                                                                                                     |                                                                                                                                                                                                                                                                                                                                                                                                                                                                                                                               |                                                                                                                                                                                                                                                                                              |
| Funding                                                                     | Not known                                                                                                                                                                                                                                                                                                                                                                                    |                                                                                                                                                                                                                                                                                                                                                                                                                                                                                                                               |                                                                                                                                                                                                                                                                                              |
| Conflict of interest                                                        | -                                                                                                                                                                                                                                                                                                                                                                                            |                                                                                                                                                                                                                                                                                                                                                                                                                                                                                                                               |                                                                                                                                                                                                                                                                                              |
| Part of other network(s)                                                    | -                                                                                                                                                                                                                                                                                                                                                                                            |                                                                                                                                                                                                                                                                                                                                                                                                                                                                                                                               |                                                                                                                                                                                                                                                                                              |
| Grouping other network(s)                                                   | -                                                                                                                                                                                                                                                                                                                                                                                            |                                                                                                                                                                                                                                                                                                                                                                                                                                                                                                                               |                                                                                                                                                                                                                                                                                              |
| <b>MONITORING SUBJECT</b>                                                   |                                                                                                                                                                                                                                                                                                                                                                                              |                                                                                                                                                                                                                                                                                                                                                                                                                                                                                                                               |                                                                                                                                                                                                                                                                                              |
| Description                                                                 | Monitoring and collecting distribution data of butterflies                                                                                                                                                                                                                                                                                                                                   |                                                                                                                                                                                                                                                                                                                                                                                                                                                                                                                               |                                                                                                                                                                                                                                                                                              |
| Protection goal(s) and/or influencing factor(s)                             | <input checked="" type="checkbox"/> Protection goal<br><br><input checked="" type="checkbox"/> Biodiversity: Butterflies<br><input type="checkbox"/> Human Health<br><input type="checkbox"/> Animal Health<br><input type="checkbox"/> Plant Health<br><input type="checkbox"/> Soil function<br><input type="checkbox"/> Water quality<br><input type="checkbox"/> Sustainable Agriculture | <input type="checkbox"/> Influencing factor<br><br><input type="checkbox"/> Agronomic practice<br><input type="checkbox"/> Plant protection<br><input type="checkbox"/> GMO cultivation<br><input type="checkbox"/> Environmental conditions                                                                                                                                                                                                                                                                                  |                                                                                                                                                                                                                                                                                              |
| Duplication of Farmer's questionnaire                                       | <input checked="" type="checkbox"/> No duplication<br><input type="checkbox"/> Partly duplication<br><input type="checkbox"/> Complete duplication                                                                                                                                                                                                                                           |                                                                                                                                                                                                                                                                                                                                                                                                                                                                                                                               |                                                                                                                                                                                                                                                                                              |
| <b>SPECIFICITY</b>                                                          |                                                                                                                                                                                                                                                                                                                                                                                              |                                                                                                                                                                                                                                                                                                                                                                                                                                                                                                                               |                                                                                                                                                                                                                                                                                              |
| Geography                                                                   | <input type="checkbox"/> EU -wide<br><br><input type="checkbox"/> Zone A – North<br><input checked="" type="checkbox"/> Zone B – Centre:<br><input type="checkbox"/> Zone C – South                                                                                                                                                                                                          |                                                                                                                                                                                                                                                                                                                                                                                                                                                                                                                               |                                                                                                                                                                                                                                                                                              |
|                                                                             | <input type="checkbox"/> Denmark,<br><input type="checkbox"/> Estonia,<br><input type="checkbox"/> Latvia,<br><input type="checkbox"/> Lithuania,<br><input type="checkbox"/> Finland,<br><input type="checkbox"/> Sweden                                                                                                                                                                    | <input type="checkbox"/> Belgium,<br><input type="checkbox"/> Czech Republic,<br><input type="checkbox"/> Germany,<br><input type="checkbox"/> Ireland,<br><input type="checkbox"/> Luxembourg,<br><input type="checkbox"/> Hungary,<br><input type="checkbox"/> Netherlands,<br><input type="checkbox"/> Austria,<br><input type="checkbox"/> Poland,<br><input type="checkbox"/> Romania,<br><input type="checkbox"/> Slovenia,<br><input checked="" type="checkbox"/> Slovakia,<br><input type="checkbox"/> United Kingdom | <input type="checkbox"/> Bulgaria,<br><input type="checkbox"/> Greece,<br><input type="checkbox"/> Spain,<br><input type="checkbox"/> France,<br><input type="checkbox"/> Italy,<br><input type="checkbox"/> Cyprus,<br><input type="checkbox"/> Malta,<br><input type="checkbox"/> Portugal |
|                                                                             | <input type="checkbox"/> Regional (specify)<br><input type="checkbox"/> Local (specify)                                                                                                                                                                                                                                                                                                      |                                                                                                                                                                                                                                                                                                                                                                                                                                                                                                                               |                                                                                                                                                                                                                                                                                              |
| Factors                                                                     | <input checked="" type="checkbox"/> Multiple species/items (specify): butterflies and moths<br><input type="checkbox"/> Single species/item (specify)                                                                                                                                                                                                                                        |                                                                                                                                                                                                                                                                                                                                                                                                                                                                                                                               |                                                                                                                                                                                                                                                                                              |
| Crop                                                                        | <input checked="" type="checkbox"/> No specific crop(s)<br><input type="checkbox"/> Several crops (e.g. all cereals)<br><input type="checkbox"/> Single crop                                                                                                                                                                                                                                 |                                                                                                                                                                                                                                                                                                                                                                                                                                                                                                                               |                                                                                                                                                                                                                                                                                              |
| Trait /treatment                                                            | <input checked="" type="checkbox"/> No specific traits/treatments<br><input type="checkbox"/> Several traits/treatments<br><input type="checkbox"/> Single trait/treatment                                                                                                                                                                                                                   |                                                                                                                                                                                                                                                                                                                                                                                                                                                                                                                               |                                                                                                                                                                                                                                                                                              |
| GMO                                                                         | <input checked="" type="checkbox"/> No GMO bias<br><input type="checkbox"/> GMO specific                                                                                                                                                                                                                                                                                                     |                                                                                                                                                                                                                                                                                                                                                                                                                                                                                                                               |                                                                                                                                                                                                                                                                                              |
| <b>METHODOLOGY</b>                                                          |                                                                                                                                                                                                                                                                                                                                                                                              |                                                                                                                                                                                                                                                                                                                                                                                                                                                                                                                               |                                                                                                                                                                                                                                                                                              |

|                                                                                                                     |                                                                                                                                                                                                                                                                                                                                   |
|---------------------------------------------------------------------------------------------------------------------|-----------------------------------------------------------------------------------------------------------------------------------------------------------------------------------------------------------------------------------------------------------------------------------------------------------------------------------|
| Observations                                                                                                        | <input checked="" type="checkbox"/> Reported, verifiable methodology<br><input type="checkbox"/> Reported, unverifiable methodology<br><input type="checkbox"/> Unknown, unverifiable methodology                                                                                                                                 |
| Frequency                                                                                                           | <input checked="" type="checkbox"/> > 1 time/year<br><input type="checkbox"/> 1 time/year<br><input type="checkbox"/> < 1 time/year                                                                                                                                                                                               |
| Future                                                                                                              | <input type="checkbox"/> For ≥ 5 years<br><input type="checkbox"/> between 1 and 5 years<br><input type="checkbox"/> no prospect                                                                                                                                                                                                  |
| Quality of performers                                                                                               | <input type="checkbox"/> Trained, professionals<br><input checked="" type="checkbox"/> Trained, non-professionals –skilled volunteers; written guidelines<br><input type="checkbox"/> Uncertain or not -specified                                                                                                                 |
| Quality of data                                                                                                     | <input checked="" type="checkbox"/> Standard recording of raw data<br><input type="checkbox"/> Free recording of raw data<br><input type="checkbox"/> Anecdotic                                                                                                                                                                   |
| Analysis                                                                                                            | <input type="checkbox"/> Reported, verifiable methodology<br><input type="checkbox"/> Reported, unverifiable methodology<br><input checked="" type="checkbox"/> Unknown, unverifiable methodology                                                                                                                                 |
| Quality of analysis                                                                                                 | <input type="checkbox"/> Scientifically based<br><input type="checkbox"/> Indicative only<br><input checked="" type="checkbox"/> Unknown                                                                                                                                                                                          |
| <b>REPORTING</b>                                                                                                    |                                                                                                                                                                                                                                                                                                                                   |
| Language                                                                                                            | Reporting language(s): Slovak                                                                                                                                                                                                                                                                                                     |
| Availability                                                                                                        | <input checked="" type="checkbox"/> Scientific publication<br><input checked="" type="checkbox"/> Official report available on the internet or in other public forum: lists<br><input checked="" type="checkbox"/> Official report available from network: butterfly atlas, other books<br><input type="checkbox"/> Not available |
| Frequency                                                                                                           | <input checked="" type="checkbox"/> ≥ 1 time/year – year report<br><input type="checkbox"/> < 1 time/year – books                                                                                                                                                                                                                 |
| Historical reference                                                                                                | <input type="checkbox"/> over ≥ 5 years<br><input type="checkbox"/> between 1 and 5 years<br><input checked="" type="checkbox"/> no historical analysis                                                                                                                                                                           |
| <b>COMMENT(S)</b>                                                                                                   |                                                                                                                                                                                                                                                                                                                                   |
| Network using selected species as representative indicators and as protection goals. (includes Natura 2000 species) |                                                                                                                                                                                                                                                                                                                                   |

## Spain

## GSEN-09-0083.00.2 ES – ASEAN

| EuropaBio's coordinated approach to General Surveillance: Existing Networks |                                                                                                                                                                                                                                                                                                                                                                                        |                                                                                                                                                                                                                                                                                                                                                                                                                                                                                                                   |                                                                                                                                                                                                                                                                                                         |
|-----------------------------------------------------------------------------|----------------------------------------------------------------------------------------------------------------------------------------------------------------------------------------------------------------------------------------------------------------------------------------------------------------------------------------------------------------------------------------|-------------------------------------------------------------------------------------------------------------------------------------------------------------------------------------------------------------------------------------------------------------------------------------------------------------------------------------------------------------------------------------------------------------------------------------------------------------------------------------------------------------------|---------------------------------------------------------------------------------------------------------------------------------------------------------------------------------------------------------------------------------------------------------------------------------------------------------|
| <b>ORGANISATION</b>                                                         |                                                                                                                                                                                                                                                                                                                                                                                        |                                                                                                                                                                                                                                                                                                                                                                                                                                                                                                                   |                                                                                                                                                                                                                                                                                                         |
| EuropaBio reference                                                         | GS-EN-09-0083                                                                                                                                                                                                                                                                                                                                                                          |                                                                                                                                                                                                                                                                                                                                                                                                                                                                                                                   |                                                                                                                                                                                                                                                                                                         |
| Official name of the Network                                                | <b>Agencia Española de Seguridad Alimentaria y Nutrición (AESAN)</b><br><b>Sistema Coordinado de Intercambio Rápido de Información (SCIRI).</b>                                                                                                                                                                                                                                        |                                                                                                                                                                                                                                                                                                                                                                                                                                                                                                                   |                                                                                                                                                                                                                                                                                                         |
| Other names                                                                 | Spanish Food Safety Agency                                                                                                                                                                                                                                                                                                                                                             |                                                                                                                                                                                                                                                                                                                                                                                                                                                                                                                   |                                                                                                                                                                                                                                                                                                         |
| Type of organisation                                                        | Governmental<br>Founded (unknown)                                                                                                                                                                                                                                                                                                                                                      |                                                                                                                                                                                                                                                                                                                                                                                                                                                                                                                   |                                                                                                                                                                                                                                                                                                         |
| Coordinates                                                                 |                                                                                                                                                                                                                                                                                                                                                                                        |                                                                                                                                                                                                                                                                                                                                                                                                                                                                                                                   |                                                                                                                                                                                                                                                                                                         |
| Website                                                                     | <a href="http://www.aesan.msc.es/AESAN/web/alertas/alertas.shtml">http://www.aesan.msc.es/AESAN/web/alertas/alertas.shtml</a>                                                                                                                                                                                                                                                          |                                                                                                                                                                                                                                                                                                                                                                                                                                                                                                                   |                                                                                                                                                                                                                                                                                                         |
| Funding                                                                     | Government                                                                                                                                                                                                                                                                                                                                                                             |                                                                                                                                                                                                                                                                                                                                                                                                                                                                                                                   |                                                                                                                                                                                                                                                                                                         |
| Conflict of interest                                                        | -                                                                                                                                                                                                                                                                                                                                                                                      |                                                                                                                                                                                                                                                                                                                                                                                                                                                                                                                   |                                                                                                                                                                                                                                                                                                         |
| Part of other network(s)                                                    | European RASFF                                                                                                                                                                                                                                                                                                                                                                         |                                                                                                                                                                                                                                                                                                                                                                                                                                                                                                                   |                                                                                                                                                                                                                                                                                                         |
| Grouping other network(s)                                                   | Network with Spain with official contact points                                                                                                                                                                                                                                                                                                                                        |                                                                                                                                                                                                                                                                                                                                                                                                                                                                                                                   |                                                                                                                                                                                                                                                                                                         |
| <b>MONITORING SUBJECT</b>                                                   |                                                                                                                                                                                                                                                                                                                                                                                        |                                                                                                                                                                                                                                                                                                                                                                                                                                                                                                                   |                                                                                                                                                                                                                                                                                                         |
| Description                                                                 | Provide food and feed control authorities with an effective tool to exchange information about measures taken responding to serious risks detected in relation to food or feed.                                                                                                                                                                                                        |                                                                                                                                                                                                                                                                                                                                                                                                                                                                                                                   |                                                                                                                                                                                                                                                                                                         |
| Protection goal(s) and/or influencing factor(s)                             | <input checked="" type="checkbox"/> Protection goal<br><input type="checkbox"/> Biodiversity<br><input checked="" type="checkbox"/> Human Health<br><input checked="" type="checkbox"/> Animal Health<br><input type="checkbox"/> Plant Health<br><input type="checkbox"/> Soil function<br><input type="checkbox"/> Water quality<br><input type="checkbox"/> Sustainable Agriculture | <input type="checkbox"/> Influencing factor<br><input type="checkbox"/> Agronomic practice<br><input type="checkbox"/> Plant protection<br><input type="checkbox"/> GMO cultivation<br><input type="checkbox"/> Environmental conditions                                                                                                                                                                                                                                                                          |                                                                                                                                                                                                                                                                                                         |
| Duplication of Farmer's questionnaire                                       | <input checked="" type="checkbox"/> No duplication<br><input type="checkbox"/> Partly duplication<br><input type="checkbox"/> Complete duplication                                                                                                                                                                                                                                     |                                                                                                                                                                                                                                                                                                                                                                                                                                                                                                                   |                                                                                                                                                                                                                                                                                                         |
| <b>SPECIFICITY</b>                                                          |                                                                                                                                                                                                                                                                                                                                                                                        |                                                                                                                                                                                                                                                                                                                                                                                                                                                                                                                   |                                                                                                                                                                                                                                                                                                         |
| Geography                                                                   | <input type="checkbox"/> EU -wide                                                                                                                                                                                                                                                                                                                                                      |                                                                                                                                                                                                                                                                                                                                                                                                                                                                                                                   |                                                                                                                                                                                                                                                                                                         |
|                                                                             | <input type="checkbox"/> Zone A – North                                                                                                                                                                                                                                                                                                                                                | <input type="checkbox"/> Zone B – Centre:                                                                                                                                                                                                                                                                                                                                                                                                                                                                         | <input checked="" type="checkbox"/> Zone C – South                                                                                                                                                                                                                                                      |
|                                                                             | <input type="checkbox"/> Denmark,<br><input type="checkbox"/> Estonia,<br><input type="checkbox"/> Latvia,<br><input type="checkbox"/> Lithuania,<br><input type="checkbox"/> Finland,<br><input type="checkbox"/> Sweden                                                                                                                                                              | <input type="checkbox"/> Belgium,<br><input type="checkbox"/> Czech Republic<br><input type="checkbox"/> Germany,<br><input type="checkbox"/> Ireland,<br><input type="checkbox"/> Luxembourg,<br><input type="checkbox"/> Hungary,<br><input type="checkbox"/> Netherlands,<br><input type="checkbox"/> Austria,<br><input type="checkbox"/> Poland,<br><input type="checkbox"/> Romania,<br><input type="checkbox"/> Slovenia,<br><input type="checkbox"/> Slovakia,<br><input type="checkbox"/> United Kingdom | <input type="checkbox"/> Bulgaria,<br><input type="checkbox"/> Greece,<br><input checked="" type="checkbox"/> Spain,<br><input type="checkbox"/> France,<br><input type="checkbox"/> Italy,<br><input type="checkbox"/> Cyprus,<br><input type="checkbox"/> Malta,<br><input type="checkbox"/> Portugal |
|                                                                             | <input type="checkbox"/> Regional (specify)<br><input type="checkbox"/> Local (specify)                                                                                                                                                                                                                                                                                                |                                                                                                                                                                                                                                                                                                                                                                                                                                                                                                                   |                                                                                                                                                                                                                                                                                                         |
| Factors                                                                     | <input checked="" type="checkbox"/> Multiple species/items (specify) any health effect<br><input type="checkbox"/> Single species/item (specify)                                                                                                                                                                                                                                       |                                                                                                                                                                                                                                                                                                                                                                                                                                                                                                                   |                                                                                                                                                                                                                                                                                                         |
| Crop                                                                        | <input checked="" type="checkbox"/> No specific crop(s)<br><input type="checkbox"/> Several crops (e.g. all cereals)<br><input type="checkbox"/> Single crop                                                                                                                                                                                                                           |                                                                                                                                                                                                                                                                                                                                                                                                                                                                                                                   |                                                                                                                                                                                                                                                                                                         |
| Trait /treatment                                                            | <input checked="" type="checkbox"/> No specific traits/treatments<br><input type="checkbox"/> Several traits/treatments<br><input type="checkbox"/> Single trait/treatment                                                                                                                                                                                                             |                                                                                                                                                                                                                                                                                                                                                                                                                                                                                                                   |                                                                                                                                                                                                                                                                                                         |
| GMO                                                                         | <input checked="" type="checkbox"/> No GMO bias<br><input type="checkbox"/> GMO specific                                                                                                                                                                                                                                                                                               |                                                                                                                                                                                                                                                                                                                                                                                                                                                                                                                   |                                                                                                                                                                                                                                                                                                         |
| <b>METHODOLOGY</b>                                                          |                                                                                                                                                                                                                                                                                                                                                                                        |                                                                                                                                                                                                                                                                                                                                                                                                                                                                                                                   |                                                                                                                                                                                                                                                                                                         |
| Observations                                                                | <input type="checkbox"/> Reported, verifiable methodology<br><input type="checkbox"/> Reported, unverifiable methodology<br><input type="checkbox"/> Unknown, unverifiable methodology                                                                                                                                                                                                 |                                                                                                                                                                                                                                                                                                                                                                                                                                                                                                                   |                                                                                                                                                                                                                                                                                                         |

|                                                                                                                                                                          |                                                                                                                                                                                                                                                                        |
|--------------------------------------------------------------------------------------------------------------------------------------------------------------------------|------------------------------------------------------------------------------------------------------------------------------------------------------------------------------------------------------------------------------------------------------------------------|
| Frequency                                                                                                                                                                | <input checked="" type="checkbox"/> > 1 time/year<br><input type="checkbox"/> 1 time/year<br><input type="checkbox"/> < 1 time/year                                                                                                                                    |
| Future                                                                                                                                                                   | <input checked="" type="checkbox"/> For $\geq$ 5 years<br><input type="checkbox"/> between 1 and 5 years<br><input type="checkbox"/> no prospect                                                                                                                       |
| Quality of performers                                                                                                                                                    | <input checked="" type="checkbox"/> Trained, professionals<br><input type="checkbox"/> Trained, non-professionals – training by documentation, volunteers<br><input type="checkbox"/> Uncertain or not -specified                                                      |
| Quality of data                                                                                                                                                          | <input checked="" type="checkbox"/> Standard recording of raw data<br><input type="checkbox"/> Free recording of raw data<br><input type="checkbox"/> Anecdotic                                                                                                        |
| Analysis                                                                                                                                                                 | <input type="checkbox"/> Reported, verifiable methodology<br><input type="checkbox"/> Reported, unverifiable methodology<br><input type="checkbox"/> Unknown, unverifiable methodology                                                                                 |
| Quality of analysis                                                                                                                                                      | <input checked="" type="checkbox"/> Scientifically based<br><input type="checkbox"/> Indicative only<br><input type="checkbox"/> Unknown                                                                                                                               |
| <b>REPORTING</b>                                                                                                                                                         |                                                                                                                                                                                                                                                                        |
| Language                                                                                                                                                                 | <input type="checkbox"/> Specify reporting language(s): Spanish                                                                                                                                                                                                        |
| Availability                                                                                                                                                             | <input type="checkbox"/> Scientific publication<br><input checked="" type="checkbox"/> Official report available on the internet or in other public forum<br><input type="checkbox"/> Official report available from network<br><input type="checkbox"/> Not available |
| Frequency                                                                                                                                                                | <input type="checkbox"/> $\geq$ 1 time/year – Yearly reports, frequent notifications<br><input type="checkbox"/> < 1 time/year                                                                                                                                         |
| Historical reference                                                                                                                                                     | <input checked="" type="checkbox"/> over $\geq$ 5 years<br><input type="checkbox"/> between 1 and 5 years<br><input type="checkbox"/> no historical analysis                                                                                                           |
| <b>COMMENT(S)</b>                                                                                                                                                        |                                                                                                                                                                                                                                                                        |
| Alert system based on local indications. The SCIRI does not monitor, but provides a rapid way of distributing information to all members and the public. Yearly reports. |                                                                                                                                                                                                                                                                        |

## GSEN-09-0088.00.2 ES – RASVE

| EuropaBio's coordinated approach to General Surveillance: Existing Networks |                                                                                                                                                                                                                                                                                                                      |                                                                                                                                                                                                                                                                                                                                                                                                                                                                                                                   |                                                                                                                                                                                                                                                                                                         |
|-----------------------------------------------------------------------------|----------------------------------------------------------------------------------------------------------------------------------------------------------------------------------------------------------------------------------------------------------------------------------------------------------------------|-------------------------------------------------------------------------------------------------------------------------------------------------------------------------------------------------------------------------------------------------------------------------------------------------------------------------------------------------------------------------------------------------------------------------------------------------------------------------------------------------------------------|---------------------------------------------------------------------------------------------------------------------------------------------------------------------------------------------------------------------------------------------------------------------------------------------------------|
| <b>ORGANISATION</b>                                                         |                                                                                                                                                                                                                                                                                                                      |                                                                                                                                                                                                                                                                                                                                                                                                                                                                                                                   |                                                                                                                                                                                                                                                                                                         |
| EuropaBio reference                                                         | GS-EN-09-0088                                                                                                                                                                                                                                                                                                        |                                                                                                                                                                                                                                                                                                                                                                                                                                                                                                                   |                                                                                                                                                                                                                                                                                                         |
| Official name of the Network                                                | <b>Ministerio de Medio Ambiente y Medio Rural y Marino (MARM)<br/>Red de Alerta Sanitaria Veterinaria (RASVE)</b>                                                                                                                                                                                                    |                                                                                                                                                                                                                                                                                                                                                                                                                                                                                                                   |                                                                                                                                                                                                                                                                                                         |
| Other names                                                                 | Ministry of Agriculture, Food and Environment: Veterinary Sanitary Alerts Network                                                                                                                                                                                                                                    |                                                                                                                                                                                                                                                                                                                                                                                                                                                                                                                   |                                                                                                                                                                                                                                                                                                         |
| Type of organisation                                                        | Governmental<br>Founded (unknown)                                                                                                                                                                                                                                                                                    |                                                                                                                                                                                                                                                                                                                                                                                                                                                                                                                   |                                                                                                                                                                                                                                                                                                         |
| Coordinates                                                                 |                                                                                                                                                                                                                                                                                                                      |                                                                                                                                                                                                                                                                                                                                                                                                                                                                                                                   |                                                                                                                                                                                                                                                                                                         |
| Website                                                                     | <a href="http://rasve.magrama.es/">http://rasve.magrama.es/</a>                                                                                                                                                                                                                                                      |                                                                                                                                                                                                                                                                                                                                                                                                                                                                                                                   |                                                                                                                                                                                                                                                                                                         |
| Funding                                                                     | Government                                                                                                                                                                                                                                                                                                           |                                                                                                                                                                                                                                                                                                                                                                                                                                                                                                                   |                                                                                                                                                                                                                                                                                                         |
| Conflict of interest                                                        | -                                                                                                                                                                                                                                                                                                                    |                                                                                                                                                                                                                                                                                                                                                                                                                                                                                                                   |                                                                                                                                                                                                                                                                                                         |
| Part of other network(s)                                                    |                                                                                                                                                                                                                                                                                                                      |                                                                                                                                                                                                                                                                                                                                                                                                                                                                                                                   |                                                                                                                                                                                                                                                                                                         |
| Grouping other network(s)                                                   | Network with Spain with official contact points                                                                                                                                                                                                                                                                      |                                                                                                                                                                                                                                                                                                                                                                                                                                                                                                                   |                                                                                                                                                                                                                                                                                                         |
| <b>MONITORING SUBJECT</b>                                                   |                                                                                                                                                                                                                                                                                                                      |                                                                                                                                                                                                                                                                                                                                                                                                                                                                                                                   |                                                                                                                                                                                                                                                                                                         |
| Description                                                                 | Information relating to animal health, serving as a support system in the control and disease surveillance.                                                                                                                                                                                                          |                                                                                                                                                                                                                                                                                                                                                                                                                                                                                                                   |                                                                                                                                                                                                                                                                                                         |
| Protection goal(s) and/or influencing factor(s)                             | <input checked="" type="checkbox"/> Protection goal                                                                                                                                                                                                                                                                  | <input type="checkbox"/> Influencing factor                                                                                                                                                                                                                                                                                                                                                                                                                                                                       |                                                                                                                                                                                                                                                                                                         |
|                                                                             | <input type="checkbox"/> Biodiversity<br><input type="checkbox"/> Human Health<br><input checked="" type="checkbox"/> Animal Health<br><input type="checkbox"/> Plant Health<br><input type="checkbox"/> Soil function<br><input type="checkbox"/> Water quality<br><input type="checkbox"/> Sustainable Agriculture | <input type="checkbox"/> Agronomic practice<br><input type="checkbox"/> Plant protection<br><input type="checkbox"/> GMO cultivation<br><input type="checkbox"/> Environmental conditions                                                                                                                                                                                                                                                                                                                         |                                                                                                                                                                                                                                                                                                         |
| Duplication of Farmer's questionnaire                                       | <input checked="" type="checkbox"/> No duplication<br><input type="checkbox"/> Partly duplication<br><input type="checkbox"/> Complete duplication                                                                                                                                                                   |                                                                                                                                                                                                                                                                                                                                                                                                                                                                                                                   |                                                                                                                                                                                                                                                                                                         |
| <b>SPECIFICITY</b>                                                          |                                                                                                                                                                                                                                                                                                                      |                                                                                                                                                                                                                                                                                                                                                                                                                                                                                                                   |                                                                                                                                                                                                                                                                                                         |
| Geography                                                                   | <input type="checkbox"/> EU -wide                                                                                                                                                                                                                                                                                    |                                                                                                                                                                                                                                                                                                                                                                                                                                                                                                                   |                                                                                                                                                                                                                                                                                                         |
|                                                                             | <input type="checkbox"/> Zone A – North                                                                                                                                                                                                                                                                              | <input type="checkbox"/> Zone B – Centre:                                                                                                                                                                                                                                                                                                                                                                                                                                                                         | <input checked="" type="checkbox"/> Zone C – South                                                                                                                                                                                                                                                      |
|                                                                             | <input type="checkbox"/> Denmark,<br><input type="checkbox"/> Estonia,<br><input type="checkbox"/> Latvia,<br><input type="checkbox"/> Lithuania,<br><input type="checkbox"/> Finland,<br><input type="checkbox"/> Sweden                                                                                            | <input type="checkbox"/> Belgium,<br><input type="checkbox"/> Czech Republic<br><input type="checkbox"/> Germany,<br><input type="checkbox"/> Ireland,<br><input type="checkbox"/> Luxembourg,<br><input type="checkbox"/> Hungary,<br><input type="checkbox"/> Netherlands,<br><input type="checkbox"/> Austria,<br><input type="checkbox"/> Poland,<br><input type="checkbox"/> Romania,<br><input type="checkbox"/> Slovenia,<br><input type="checkbox"/> Slovakia,<br><input type="checkbox"/> United Kingdom | <input type="checkbox"/> Bulgaria,<br><input type="checkbox"/> Greece,<br><input checked="" type="checkbox"/> Spain,<br><input type="checkbox"/> France,<br><input type="checkbox"/> Italy,<br><input type="checkbox"/> Cyprus,<br><input type="checkbox"/> Malta,<br><input type="checkbox"/> Portugal |
|                                                                             | <input type="checkbox"/> Regional (specify)<br><input type="checkbox"/> Local (specify)                                                                                                                                                                                                                              |                                                                                                                                                                                                                                                                                                                                                                                                                                                                                                                   |                                                                                                                                                                                                                                                                                                         |
| Factors                                                                     | <input checked="" type="checkbox"/> Multiple species/items (specify) any animal health effect (diseases)<br><input type="checkbox"/> Single species/item (specify)                                                                                                                                                   |                                                                                                                                                                                                                                                                                                                                                                                                                                                                                                                   |                                                                                                                                                                                                                                                                                                         |
| Crop                                                                        | <input checked="" type="checkbox"/> No specific crop(s)<br><input type="checkbox"/> Several crops (e.g. all cereals)<br><input type="checkbox"/> Single crop                                                                                                                                                         |                                                                                                                                                                                                                                                                                                                                                                                                                                                                                                                   |                                                                                                                                                                                                                                                                                                         |
| Trait /treatment                                                            | <input checked="" type="checkbox"/> No specific traits/treatments<br><input type="checkbox"/> Several traits/treatments<br><input type="checkbox"/> Single trait/treatment                                                                                                                                           |                                                                                                                                                                                                                                                                                                                                                                                                                                                                                                                   |                                                                                                                                                                                                                                                                                                         |
| GMO                                                                         | <input checked="" type="checkbox"/> No GMO bias<br><input type="checkbox"/> GMO specific                                                                                                                                                                                                                             |                                                                                                                                                                                                                                                                                                                                                                                                                                                                                                                   |                                                                                                                                                                                                                                                                                                         |
| <b>METHODOLOGY</b>                                                          |                                                                                                                                                                                                                                                                                                                      |                                                                                                                                                                                                                                                                                                                                                                                                                                                                                                                   |                                                                                                                                                                                                                                                                                                         |
| Observations                                                                | <input type="checkbox"/> Reported, verifiable methodology<br><input type="checkbox"/> Reported, unverifiable methodology<br><input type="checkbox"/> Unknown, unverifiable methodology                                                                                                                               |                                                                                                                                                                                                                                                                                                                                                                                                                                                                                                                   |                                                                                                                                                                                                                                                                                                         |



|                                                                                                                                                                                                                                                                                                |                                                                                                                                                                                                                                                                        |
|------------------------------------------------------------------------------------------------------------------------------------------------------------------------------------------------------------------------------------------------------------------------------------------------|------------------------------------------------------------------------------------------------------------------------------------------------------------------------------------------------------------------------------------------------------------------------|
| Frequency                                                                                                                                                                                                                                                                                      | <input checked="" type="checkbox"/> > 1 time/year<br><input type="checkbox"/> 1 time/year<br><input type="checkbox"/> < 1 time/year                                                                                                                                    |
| Future                                                                                                                                                                                                                                                                                         | <input checked="" type="checkbox"/> For $\geq$ 5 years<br><input type="checkbox"/> between 1 and 5 years<br><input type="checkbox"/> no prospect                                                                                                                       |
| Quality of performers                                                                                                                                                                                                                                                                          | <input checked="" type="checkbox"/> Trained, professionals<br><input type="checkbox"/> Trained, non-professionals – training by documentation, volunteers<br><input type="checkbox"/> Uncertain or not -specified                                                      |
| Quality of data                                                                                                                                                                                                                                                                                | <input checked="" type="checkbox"/> Standard recording of raw data<br><input type="checkbox"/> Free recording of raw data<br><input type="checkbox"/> Anecdotic                                                                                                        |
| Analysis                                                                                                                                                                                                                                                                                       | <input type="checkbox"/> Reported, verifiable methodology<br><input type="checkbox"/> Reported, unverifiable methodology<br><input type="checkbox"/> Unknown, unverifiable methodology                                                                                 |
| Quality of analysis                                                                                                                                                                                                                                                                            | <input checked="" type="checkbox"/> Scientifically based<br><input type="checkbox"/> Indicative only<br><input type="checkbox"/> Unknown                                                                                                                               |
| <b>REPORTING</b>                                                                                                                                                                                                                                                                               |                                                                                                                                                                                                                                                                        |
| Language                                                                                                                                                                                                                                                                                       | <input type="checkbox"/> Specify reporting language(s): Spanish                                                                                                                                                                                                        |
| Availability                                                                                                                                                                                                                                                                                   | <input type="checkbox"/> Scientific publication<br><input checked="" type="checkbox"/> Official report available on the internet or in other public forum<br><input type="checkbox"/> Official report available from network<br><input type="checkbox"/> Not available |
| Frequency                                                                                                                                                                                                                                                                                      | <input type="checkbox"/> $\geq$ 1 time/year – Yearly reports, frequent notifications<br><input type="checkbox"/> < 1 time/year                                                                                                                                         |
| Historical reference                                                                                                                                                                                                                                                                           | <input checked="" type="checkbox"/> over $\geq$ 5 years<br><input type="checkbox"/> between 1 and 5 years<br><input type="checkbox"/> no historical analysis                                                                                                           |
| <b>COMMENT(S)</b>                                                                                                                                                                                                                                                                              |                                                                                                                                                                                                                                                                        |
| <p><b>Yearly reports provide good reviews of important cases of animal diseases.</b><br/> Alert system based on local indications. The RASVE does not monitor, but provides a rapid way of distributing information to all members and the public. Yearly reports per “classical” disease.</p> |                                                                                                                                                                                                                                                                        |

## GSEN-09-0089.00.2 ES – Perfil Ambiental de España

| EuropaBio's coordinated approach to General Surveillance: Existing Networks |                                                                                                                                                                                                                                                                                                                                                                           |                                                                                                                                                                                                                                                                                                                                                                                                                                                                                                                   |                                                                                                                                                                                                                                                                                                         |
|-----------------------------------------------------------------------------|---------------------------------------------------------------------------------------------------------------------------------------------------------------------------------------------------------------------------------------------------------------------------------------------------------------------------------------------------------------------------|-------------------------------------------------------------------------------------------------------------------------------------------------------------------------------------------------------------------------------------------------------------------------------------------------------------------------------------------------------------------------------------------------------------------------------------------------------------------------------------------------------------------|---------------------------------------------------------------------------------------------------------------------------------------------------------------------------------------------------------------------------------------------------------------------------------------------------------|
| ORGANISATION                                                                |                                                                                                                                                                                                                                                                                                                                                                           |                                                                                                                                                                                                                                                                                                                                                                                                                                                                                                                   |                                                                                                                                                                                                                                                                                                         |
| EuropaBio reference                                                         | GS-EN-09-0089                                                                                                                                                                                                                                                                                                                                                             |                                                                                                                                                                                                                                                                                                                                                                                                                                                                                                                   |                                                                                                                                                                                                                                                                                                         |
| Official name of the Network                                                | <b>Ministerio de Medio Ambiente y Medio Rural y Marino<br/>Perfil Ambiental de España</b>                                                                                                                                                                                                                                                                                 |                                                                                                                                                                                                                                                                                                                                                                                                                                                                                                                   |                                                                                                                                                                                                                                                                                                         |
| Other names                                                                 | Ministry of Agriculture, Food and Environment: Spain's Environmental Profile                                                                                                                                                                                                                                                                                              |                                                                                                                                                                                                                                                                                                                                                                                                                                                                                                                   |                                                                                                                                                                                                                                                                                                         |
| Type of organisation                                                        | Ministry                                                                                                                                                                                                                                                                                                                                                                  |                                                                                                                                                                                                                                                                                                                                                                                                                                                                                                                   |                                                                                                                                                                                                                                                                                                         |
| Coordinates                                                                 | Plaza de San Juan de la Cruz,<br>s/n 28071- Madrid                                                                                                                                                                                                                                                                                                                        |                                                                                                                                                                                                                                                                                                                                                                                                                                                                                                                   |                                                                                                                                                                                                                                                                                                         |
| Website                                                                     | <a href="http://www.magrama.gob.es/es/calidad-y-evaluacion-ambiental/publicaciones/indice_perfil_ambiental.aspx">http://www.magrama.gob.es/es/calidad-y-evaluacion-ambiental/publicaciones/indice_perfil_ambiental.aspx</a>                                                                                                                                               |                                                                                                                                                                                                                                                                                                                                                                                                                                                                                                                   |                                                                                                                                                                                                                                                                                                         |
| Funding                                                                     | public                                                                                                                                                                                                                                                                                                                                                                    |                                                                                                                                                                                                                                                                                                                                                                                                                                                                                                                   |                                                                                                                                                                                                                                                                                                         |
| Conflict of interest                                                        | -                                                                                                                                                                                                                                                                                                                                                                         |                                                                                                                                                                                                                                                                                                                                                                                                                                                                                                                   |                                                                                                                                                                                                                                                                                                         |
| Part of other network(s)                                                    | -                                                                                                                                                                                                                                                                                                                                                                         |                                                                                                                                                                                                                                                                                                                                                                                                                                                                                                                   |                                                                                                                                                                                                                                                                                                         |
| Grouping other network(s)                                                   | Cooperation of several departments of the Ministry and Nature conservation networks                                                                                                                                                                                                                                                                                       |                                                                                                                                                                                                                                                                                                                                                                                                                                                                                                                   |                                                                                                                                                                                                                                                                                                         |
| MONITORING SUBJECT                                                          |                                                                                                                                                                                                                                                                                                                                                                           |                                                                                                                                                                                                                                                                                                                                                                                                                                                                                                                   |                                                                                                                                                                                                                                                                                                         |
| Description                                                                 | Statistics on biodiversity, soil, water quality, fertiliser use, endangered species, sustainability. Aims to inform on Spain's Environmental Profile, its status and evolution.                                                                                                                                                                                           |                                                                                                                                                                                                                                                                                                                                                                                                                                                                                                                   |                                                                                                                                                                                                                                                                                                         |
| Protection goal(s) and/or influencing factor(s)                             | <input checked="" type="checkbox"/> Protection goal                                                                                                                                                                                                                                                                                                                       | <input checked="" type="checkbox"/> Influencing factor                                                                                                                                                                                                                                                                                                                                                                                                                                                            |                                                                                                                                                                                                                                                                                                         |
|                                                                             | <input checked="" type="checkbox"/> Biodiversity: general<br><input type="checkbox"/> Human Health<br><input type="checkbox"/> Animal Health<br><input checked="" type="checkbox"/> Plant Health<br><input checked="" type="checkbox"/> Soil function<br><input checked="" type="checkbox"/> Water quality<br><input checked="" type="checkbox"/> Sustainable Agriculture | <input checked="" type="checkbox"/> Agronomic practice<br><input type="checkbox"/> Plant protection<br><input type="checkbox"/> GMO cultivation<br><input checked="" type="checkbox"/> Environmental conditions                                                                                                                                                                                                                                                                                                   |                                                                                                                                                                                                                                                                                                         |
| Duplication of Farmer's questionnaire                                       | <input type="checkbox"/> No duplication<br><input checked="" type="checkbox"/> Partly duplication<br><input type="checkbox"/> Complete duplication                                                                                                                                                                                                                        |                                                                                                                                                                                                                                                                                                                                                                                                                                                                                                                   |                                                                                                                                                                                                                                                                                                         |
| SPECIFICITY                                                                 |                                                                                                                                                                                                                                                                                                                                                                           |                                                                                                                                                                                                                                                                                                                                                                                                                                                                                                                   |                                                                                                                                                                                                                                                                                                         |
| Geography                                                                   | <input type="checkbox"/> EU -wide                                                                                                                                                                                                                                                                                                                                         |                                                                                                                                                                                                                                                                                                                                                                                                                                                                                                                   |                                                                                                                                                                                                                                                                                                         |
|                                                                             | <input type="checkbox"/> Zone A – North                                                                                                                                                                                                                                                                                                                                   | <input type="checkbox"/> Zone B – Centre:                                                                                                                                                                                                                                                                                                                                                                                                                                                                         | <input type="checkbox"/> Zone C – South                                                                                                                                                                                                                                                                 |
|                                                                             | <input type="checkbox"/> Denmark,<br><input type="checkbox"/> Estonia,<br><input type="checkbox"/> Latvia,<br><input type="checkbox"/> Lithuania,<br><input type="checkbox"/> Finland,<br><input type="checkbox"/> Sweden                                                                                                                                                 | <input type="checkbox"/> Belgium,<br><input type="checkbox"/> Czech Republic<br><input type="checkbox"/> Germany,<br><input type="checkbox"/> Ireland,<br><input type="checkbox"/> Luxembourg,<br><input type="checkbox"/> Hungary,<br><input type="checkbox"/> Netherlands,<br><input type="checkbox"/> Austria,<br><input type="checkbox"/> Poland,<br><input type="checkbox"/> Romania,<br><input type="checkbox"/> Slovenia,<br><input type="checkbox"/> Slovakia,<br><input type="checkbox"/> United Kingdom | <input type="checkbox"/> Bulgaria,<br><input type="checkbox"/> Greece,<br><input checked="" type="checkbox"/> Spain,<br><input type="checkbox"/> France,<br><input type="checkbox"/> Italy,<br><input type="checkbox"/> Cyprus,<br><input type="checkbox"/> Malta,<br><input type="checkbox"/> Portugal |
|                                                                             | <input type="checkbox"/> Regional (specify)<br><input type="checkbox"/> Local (specify)                                                                                                                                                                                                                                                                                   |                                                                                                                                                                                                                                                                                                                                                                                                                                                                                                                   |                                                                                                                                                                                                                                                                                                         |
| Factors                                                                     | <input checked="" type="checkbox"/> Multiple species/items (specify): biodiversity, environment in general<br><input type="checkbox"/> Single species/item (specify)                                                                                                                                                                                                      |                                                                                                                                                                                                                                                                                                                                                                                                                                                                                                                   |                                                                                                                                                                                                                                                                                                         |
| Crop                                                                        | <input type="checkbox"/> No specific crop(s)<br><input type="checkbox"/> Several crops (e.g. all cereals)<br><input type="checkbox"/> Single crop                                                                                                                                                                                                                         |                                                                                                                                                                                                                                                                                                                                                                                                                                                                                                                   |                                                                                                                                                                                                                                                                                                         |
| Trait /treatment                                                            | <input type="checkbox"/> No specific traits/treatments<br><input type="checkbox"/> Several traits/treatments<br><input type="checkbox"/> Single trait/treatment                                                                                                                                                                                                           |                                                                                                                                                                                                                                                                                                                                                                                                                                                                                                                   |                                                                                                                                                                                                                                                                                                         |
| GMO                                                                         | <input checked="" type="checkbox"/> No GMO bias<br><input type="checkbox"/> GMO specific                                                                                                                                                                                                                                                                                  |                                                                                                                                                                                                                                                                                                                                                                                                                                                                                                                   |                                                                                                                                                                                                                                                                                                         |
| METHODOLOGY                                                                 |                                                                                                                                                                                                                                                                                                                                                                           |                                                                                                                                                                                                                                                                                                                                                                                                                                                                                                                   |                                                                                                                                                                                                                                                                                                         |
| Observations                                                                | <input type="checkbox"/> Reported, verifiable methodology<br><input checked="" type="checkbox"/> Reported, unverifiable methodology                                                                                                                                                                                                                                       |                                                                                                                                                                                                                                                                                                                                                                                                                                                                                                                   |                                                                                                                                                                                                                                                                                                         |

|                                                                                                                                                                |                                                                                                                                                                                                                                                                                              |
|----------------------------------------------------------------------------------------------------------------------------------------------------------------|----------------------------------------------------------------------------------------------------------------------------------------------------------------------------------------------------------------------------------------------------------------------------------------------|
|                                                                                                                                                                | <input type="checkbox"/> Unknown, unverifiable methodology                                                                                                                                                                                                                                   |
| Frequency                                                                                                                                                      | <input type="checkbox"/> > 1 time/year<br><input checked="" type="checkbox"/> 1 time/year: 2004 & 2005<br><input type="checkbox"/> < 1 time/year                                                                                                                                             |
| Future                                                                                                                                                         | <input type="checkbox"/> For $\geq 5$ years<br><input type="checkbox"/> between 1 and 5 years<br><input type="checkbox"/> no prospect                                                                                                                                                        |
| Quality of performers                                                                                                                                          | <input checked="" type="checkbox"/> Trained, professionals<br><input type="checkbox"/> Trained, non-professionals – training by documentation, volunteers<br><input type="checkbox"/> Uncertain or not -specified                                                                            |
| Quality of data                                                                                                                                                | <input checked="" type="checkbox"/> Standard recording of raw data<br><input type="checkbox"/> Free recording of raw data<br><input type="checkbox"/> Anecdotic                                                                                                                              |
| Analysis                                                                                                                                                       | <input checked="" type="checkbox"/> Reported, verifiable methodology<br><input type="checkbox"/> Reported, unverifiable methodology<br><input type="checkbox"/> Unknown, unverifiable methodology                                                                                            |
| Quality of analysis                                                                                                                                            | <input checked="" type="checkbox"/> Scientifically based<br><input type="checkbox"/> Indicative only<br><input type="checkbox"/> Unknown                                                                                                                                                     |
| <b>REPORTING</b>                                                                                                                                               |                                                                                                                                                                                                                                                                                              |
| Language                                                                                                                                                       | <input checked="" type="checkbox"/> Specify reporting language(s): Spanish                                                                                                                                                                                                                   |
| Availability                                                                                                                                                   | <input type="checkbox"/> Scientific publication<br><input checked="" type="checkbox"/> Official report available on the internet or in other public forum: only the 2005 report<br><input type="checkbox"/> Official report available from network<br><input type="checkbox"/> Not available |
| Frequency                                                                                                                                                      | <input checked="" type="checkbox"/> $\geq 1$ time/year – Yearly reports only available for 2004 and 2005<br><input type="checkbox"/> < 1 time/year –                                                                                                                                         |
| Historical reference                                                                                                                                           | <input checked="" type="checkbox"/> over $\geq 5$ years: same subjects analyzed in the past in different formats.<br><input type="checkbox"/> between 1 and 5 years<br><input type="checkbox"/> no historical analysis                                                                       |
| <b>COMMENT(S)</b>                                                                                                                                              |                                                                                                                                                                                                                                                                                              |
| Network using environmental indicators to describe the status and evolution of Spain's environment. General information per Autonomous region and/or province. |                                                                                                                                                                                                                                                                                              |

## GSEN-09-0090.00.2 ES – SINAC

| EuropaBio's coordinated approach to General Surveillance: Existing Networks |                                                                                                                                                                                                                                                                                                                                                                             |                                                                                                                                                                                                                                                                                                                                                                                                                                                                                                                   |                                                                                                                                                                                                                                                                                                         |
|-----------------------------------------------------------------------------|-----------------------------------------------------------------------------------------------------------------------------------------------------------------------------------------------------------------------------------------------------------------------------------------------------------------------------------------------------------------------------|-------------------------------------------------------------------------------------------------------------------------------------------------------------------------------------------------------------------------------------------------------------------------------------------------------------------------------------------------------------------------------------------------------------------------------------------------------------------------------------------------------------------|---------------------------------------------------------------------------------------------------------------------------------------------------------------------------------------------------------------------------------------------------------------------------------------------------------|
| ORGANISATION                                                                |                                                                                                                                                                                                                                                                                                                                                                             |                                                                                                                                                                                                                                                                                                                                                                                                                                                                                                                   |                                                                                                                                                                                                                                                                                                         |
| EuropaBio reference                                                         | GS-EN-09-0090                                                                                                                                                                                                                                                                                                                                                               |                                                                                                                                                                                                                                                                                                                                                                                                                                                                                                                   |                                                                                                                                                                                                                                                                                                         |
| Official name of the Network                                                | <b>Ministerio de Sanidad y Política Social</b><br><b>Sistema de Información Nacional de Agua de Consumo</b>                                                                                                                                                                                                                                                                 |                                                                                                                                                                                                                                                                                                                                                                                                                                                                                                                   |                                                                                                                                                                                                                                                                                                         |
| Other names                                                                 | National Information System on Drinking-water (SINAC)                                                                                                                                                                                                                                                                                                                       |                                                                                                                                                                                                                                                                                                                                                                                                                                                                                                                   |                                                                                                                                                                                                                                                                                                         |
| Type of organisation                                                        | Governmental<br>Founded (unknown)                                                                                                                                                                                                                                                                                                                                           |                                                                                                                                                                                                                                                                                                                                                                                                                                                                                                                   |                                                                                                                                                                                                                                                                                                         |
| Coordinates                                                                 |                                                                                                                                                                                                                                                                                                                                                                             |                                                                                                                                                                                                                                                                                                                                                                                                                                                                                                                   |                                                                                                                                                                                                                                                                                                         |
| Website                                                                     | <a href="http://sinac.msc.es/sinac">http://sinac.msc.es/sinac</a><br><a href="http://sinacformacion.msssi.es/">http://sinacformacion.msssi.es/</a><br><a href="http://sinac.msssi.es/sinac/ciudadano/CiudadanoMostrarResumenesAnualesAction.do">http://sinac.msssi.es/sinac/ciudadano/CiudadanoMostrarResumenesAnualesAction.do</a>                                         |                                                                                                                                                                                                                                                                                                                                                                                                                                                                                                                   |                                                                                                                                                                                                                                                                                                         |
| Funding                                                                     | Government                                                                                                                                                                                                                                                                                                                                                                  |                                                                                                                                                                                                                                                                                                                                                                                                                                                                                                                   |                                                                                                                                                                                                                                                                                                         |
| Conflict of interest                                                        | -                                                                                                                                                                                                                                                                                                                                                                           |                                                                                                                                                                                                                                                                                                                                                                                                                                                                                                                   |                                                                                                                                                                                                                                                                                                         |
| Part of other network(s)                                                    |                                                                                                                                                                                                                                                                                                                                                                             |                                                                                                                                                                                                                                                                                                                                                                                                                                                                                                                   |                                                                                                                                                                                                                                                                                                         |
| Grouping other network(s)                                                   | -                                                                                                                                                                                                                                                                                                                                                                           |                                                                                                                                                                                                                                                                                                                                                                                                                                                                                                                   |                                                                                                                                                                                                                                                                                                         |
| MONITORING SUBJECT                                                          |                                                                                                                                                                                                                                                                                                                                                                             |                                                                                                                                                                                                                                                                                                                                                                                                                                                                                                                   |                                                                                                                                                                                                                                                                                                         |
| Description                                                                 | Information relating to (drink) water quality and safety .                                                                                                                                                                                                                                                                                                                  |                                                                                                                                                                                                                                                                                                                                                                                                                                                                                                                   |                                                                                                                                                                                                                                                                                                         |
| Protection goal(s) and/or influencing factor(s)                             | <input checked="" type="checkbox"/> Protection goal<br><input type="checkbox"/> Biodiversity<br><input type="checkbox"/> Human Health<br><input type="checkbox"/> Animal Health<br><input type="checkbox"/> Plant Health<br><input type="checkbox"/> Soil function<br><input checked="" type="checkbox"/> Water quality<br><input type="checkbox"/> Sustainable Agriculture | <input checked="" type="checkbox"/> Influencing factor<br><input type="checkbox"/> Agronomic practice<br><input type="checkbox"/> Plant protection<br><input type="checkbox"/> GMO cultivation<br><input checked="" type="checkbox"/> Environmental conditions                                                                                                                                                                                                                                                    |                                                                                                                                                                                                                                                                                                         |
| Duplication of Farmer's questionnaire                                       | <input checked="" type="checkbox"/> No duplication<br><input type="checkbox"/> Partly duplication<br><input type="checkbox"/> Complete duplication                                                                                                                                                                                                                          |                                                                                                                                                                                                                                                                                                                                                                                                                                                                                                                   |                                                                                                                                                                                                                                                                                                         |
| SPECIFICITY                                                                 |                                                                                                                                                                                                                                                                                                                                                                             |                                                                                                                                                                                                                                                                                                                                                                                                                                                                                                                   |                                                                                                                                                                                                                                                                                                         |
| Geography                                                                   | <input type="checkbox"/> EU -wide<br><input type="checkbox"/> Zone A – North<br><input type="checkbox"/> Zone B – Centre:<br><input type="checkbox"/> Zone C – South                                                                                                                                                                                                        |                                                                                                                                                                                                                                                                                                                                                                                                                                                                                                                   |                                                                                                                                                                                                                                                                                                         |
|                                                                             | <input type="checkbox"/> Denmark,<br><input type="checkbox"/> Estonia,<br><input type="checkbox"/> Latvia,<br><input type="checkbox"/> Lithuania,<br><input type="checkbox"/> Finland,<br><input type="checkbox"/> Sweden                                                                                                                                                   | <input type="checkbox"/> Belgium,<br><input type="checkbox"/> Czech Republic<br><input type="checkbox"/> Germany,<br><input type="checkbox"/> Ireland,<br><input type="checkbox"/> Luxembourg,<br><input type="checkbox"/> Hungary,<br><input type="checkbox"/> Netherlands,<br><input type="checkbox"/> Austria,<br><input type="checkbox"/> Poland,<br><input type="checkbox"/> Romania,<br><input type="checkbox"/> Slovenia,<br><input type="checkbox"/> Slovakia,<br><input type="checkbox"/> United Kingdom | <input type="checkbox"/> Bulgaria,<br><input type="checkbox"/> Greece,<br><input checked="" type="checkbox"/> Spain,<br><input type="checkbox"/> France,<br><input type="checkbox"/> Italy,<br><input type="checkbox"/> Cyprus,<br><input type="checkbox"/> Malta,<br><input type="checkbox"/> Portugal |
|                                                                             | <input type="checkbox"/> Regional (specify)<br><input type="checkbox"/> Local (specify)                                                                                                                                                                                                                                                                                     |                                                                                                                                                                                                                                                                                                                                                                                                                                                                                                                   |                                                                                                                                                                                                                                                                                                         |
| Factors                                                                     | <input checked="" type="checkbox"/> Multiple species/items (specify): biological and chemical components<br><input type="checkbox"/> Single species/item (specify)                                                                                                                                                                                                          |                                                                                                                                                                                                                                                                                                                                                                                                                                                                                                                   |                                                                                                                                                                                                                                                                                                         |
| Crop                                                                        | <input checked="" type="checkbox"/> No specific crop(s)<br><input type="checkbox"/> Several crops (e.g. all cereals)<br><input type="checkbox"/> Single crop                                                                                                                                                                                                                |                                                                                                                                                                                                                                                                                                                                                                                                                                                                                                                   |                                                                                                                                                                                                                                                                                                         |
| Trait /treatment                                                            | <input checked="" type="checkbox"/> No specific traits/treatments<br><input type="checkbox"/> Several traits/treatments<br><input type="checkbox"/> Single trait/treatment                                                                                                                                                                                                  |                                                                                                                                                                                                                                                                                                                                                                                                                                                                                                                   |                                                                                                                                                                                                                                                                                                         |
| GMO                                                                         | <input checked="" type="checkbox"/> No GMO bias<br><input type="checkbox"/> GMO specific                                                                                                                                                                                                                                                                                    |                                                                                                                                                                                                                                                                                                                                                                                                                                                                                                                   |                                                                                                                                                                                                                                                                                                         |
| METHODOLOGY                                                                 |                                                                                                                                                                                                                                                                                                                                                                             |                                                                                                                                                                                                                                                                                                                                                                                                                                                                                                                   |                                                                                                                                                                                                                                                                                                         |
| Observations                                                                | <input type="checkbox"/> Reported, verifiable methodology<br><input type="checkbox"/> Reported, unverifiable methodology                                                                                                                                                                                                                                                    |                                                                                                                                                                                                                                                                                                                                                                                                                                                                                                                   |                                                                                                                                                                                                                                                                                                         |

|                                           |                                                                                                                                                                                                                                                                        |
|-------------------------------------------|------------------------------------------------------------------------------------------------------------------------------------------------------------------------------------------------------------------------------------------------------------------------|
|                                           | <input type="checkbox"/> Unknown, unverifiable methodology                                                                                                                                                                                                             |
| Frequency                                 | <input type="checkbox"/> > 1 time/year<br><input type="checkbox"/> 1 time/year<br><input checked="" type="checkbox"/> < 1 time/year                                                                                                                                    |
| Future                                    | <input checked="" type="checkbox"/> For $\geq 5$ years<br><input type="checkbox"/> between 1 and 5 years<br><input type="checkbox"/> no prospect                                                                                                                       |
| Quality of performers                     | <input checked="" type="checkbox"/> Trained, professionals<br><input type="checkbox"/> Trained, non-professionals – training by documentation, volunteers<br><input type="checkbox"/> Uncertain or not -specified                                                      |
| Quality of data                           | <input checked="" type="checkbox"/> Standard recording of raw data<br><input type="checkbox"/> Free recording of raw data<br><input type="checkbox"/> Anecdotic                                                                                                        |
| Analysis                                  | <input type="checkbox"/> Reported, verifiable methodology<br><input type="checkbox"/> Reported, unverifiable methodology<br><input type="checkbox"/> Unknown, unverifiable methodology                                                                                 |
| Quality of analysis                       | <input checked="" type="checkbox"/> Scientifically based<br><input type="checkbox"/> Indicative only<br><input type="checkbox"/> Unknown                                                                                                                               |
| <b>REPORTING</b>                          |                                                                                                                                                                                                                                                                        |
| Language                                  | <input type="checkbox"/> Specify reporting language(s): Spanish                                                                                                                                                                                                        |
| Availability                              | <input type="checkbox"/> Scientific publication<br><input checked="" type="checkbox"/> Official report available on the internet or in other public forum<br><input type="checkbox"/> Official report available from network<br><input type="checkbox"/> Not available |
| Frequency                                 | <input type="checkbox"/> $\geq 1$ time/year<br><input type="checkbox"/> < 1 time/year – Summary, multi year reports                                                                                                                                                    |
| Historical reference                      | <input checked="" type="checkbox"/> over $\geq 5$ years<br><input type="checkbox"/> between 1 and 5 years<br><input type="checkbox"/> no historical analysis                                                                                                           |
| <b>COMMENT(S)</b>                         |                                                                                                                                                                                                                                                                        |
| Nationwide summary in multi-year reports. |                                                                                                                                                                                                                                                                        |

## GSEN-09-0092.00.2 ES – Phytoma

| EuropaBio's coordinated approach to General Surveillance: Existing Networks |                                                                                                                                                                                                                                                                                                                                                                             |                                                                                                                                                                                                                                                                                                                                                                                                                                                                                                                   |                                                                                                                                                                                                                                                                                                         |
|-----------------------------------------------------------------------------|-----------------------------------------------------------------------------------------------------------------------------------------------------------------------------------------------------------------------------------------------------------------------------------------------------------------------------------------------------------------------------|-------------------------------------------------------------------------------------------------------------------------------------------------------------------------------------------------------------------------------------------------------------------------------------------------------------------------------------------------------------------------------------------------------------------------------------------------------------------------------------------------------------------|---------------------------------------------------------------------------------------------------------------------------------------------------------------------------------------------------------------------------------------------------------------------------------------------------------|
| <b>ORGANISATION</b>                                                         |                                                                                                                                                                                                                                                                                                                                                                             |                                                                                                                                                                                                                                                                                                                                                                                                                                                                                                                   |                                                                                                                                                                                                                                                                                                         |
| EuropaBio reference                                                         | GS-EN-09-0092                                                                                                                                                                                                                                                                                                                                                               |                                                                                                                                                                                                                                                                                                                                                                                                                                                                                                                   |                                                                                                                                                                                                                                                                                                         |
| Official name of the Network                                                | <b>Phytoma</b>                                                                                                                                                                                                                                                                                                                                                              |                                                                                                                                                                                                                                                                                                                                                                                                                                                                                                                   |                                                                                                                                                                                                                                                                                                         |
| Other names                                                                 | Spanish Plant Protection Experts and magazines                                                                                                                                                                                                                                                                                                                              |                                                                                                                                                                                                                                                                                                                                                                                                                                                                                                                   |                                                                                                                                                                                                                                                                                                         |
| Type of organisation                                                        | Professional<br>Founded (unknown)                                                                                                                                                                                                                                                                                                                                           |                                                                                                                                                                                                                                                                                                                                                                                                                                                                                                                   |                                                                                                                                                                                                                                                                                                         |
| Coordinates                                                                 | Calle San Jacinto 1-3<br>46008 Valencia                                                                                                                                                                                                                                                                                                                                     |                                                                                                                                                                                                                                                                                                                                                                                                                                                                                                                   |                                                                                                                                                                                                                                                                                                         |
| Website                                                                     | <a href="http://www.phytoma.com">http://www.phytoma.com</a>                                                                                                                                                                                                                                                                                                                 |                                                                                                                                                                                                                                                                                                                                                                                                                                                                                                                   |                                                                                                                                                                                                                                                                                                         |
| Funding                                                                     | Subscriptions                                                                                                                                                                                                                                                                                                                                                               |                                                                                                                                                                                                                                                                                                                                                                                                                                                                                                                   |                                                                                                                                                                                                                                                                                                         |
| Conflict of interest                                                        | -                                                                                                                                                                                                                                                                                                                                                                           |                                                                                                                                                                                                                                                                                                                                                                                                                                                                                                                   |                                                                                                                                                                                                                                                                                                         |
| Part of other network(s)                                                    | -                                                                                                                                                                                                                                                                                                                                                                           |                                                                                                                                                                                                                                                                                                                                                                                                                                                                                                                   |                                                                                                                                                                                                                                                                                                         |
| Grouping other network(s)                                                   | -                                                                                                                                                                                                                                                                                                                                                                           |                                                                                                                                                                                                                                                                                                                                                                                                                                                                                                                   |                                                                                                                                                                                                                                                                                                         |
| <b>MONITORING SUBJECT</b>                                                   |                                                                                                                                                                                                                                                                                                                                                                             |                                                                                                                                                                                                                                                                                                                                                                                                                                                                                                                   |                                                                                                                                                                                                                                                                                                         |
| Description                                                                 | Phytosanitary research and recommendations, links to official regional information                                                                                                                                                                                                                                                                                          |                                                                                                                                                                                                                                                                                                                                                                                                                                                                                                                   |                                                                                                                                                                                                                                                                                                         |
| Protection goal(s) and/or influencing factor(s)                             | <input checked="" type="checkbox"/> Protection goal<br><input type="checkbox"/> Biodiversity<br><input type="checkbox"/> Human Health<br><input type="checkbox"/> Animal Health<br><input checked="" type="checkbox"/> Plant Health<br><input type="checkbox"/> Soil function<br><input type="checkbox"/> Water quality<br><input type="checkbox"/> Sustainable Agriculture | <input checked="" type="checkbox"/> Influencing factor<br><input checked="" type="checkbox"/> Agronomic practice<br><input checked="" type="checkbox"/> Plant protection<br><input type="checkbox"/> GMO cultivation<br><input type="checkbox"/> Environmental conditions                                                                                                                                                                                                                                         |                                                                                                                                                                                                                                                                                                         |
| Duplication of Farmer's questionnaire                                       | <input type="checkbox"/> No duplication<br><input checked="" type="checkbox"/> Partly duplication<br><input type="checkbox"/> Complete duplication                                                                                                                                                                                                                          |                                                                                                                                                                                                                                                                                                                                                                                                                                                                                                                   |                                                                                                                                                                                                                                                                                                         |
| <b>SPECIFICITY</b>                                                          |                                                                                                                                                                                                                                                                                                                                                                             |                                                                                                                                                                                                                                                                                                                                                                                                                                                                                                                   |                                                                                                                                                                                                                                                                                                         |
| Geography                                                                   | <input type="checkbox"/> EU -wide<br><input type="checkbox"/> Zone A – North<br><input type="checkbox"/> Zone B – Centre:<br><input checked="" type="checkbox"/> Zone C – South                                                                                                                                                                                             |                                                                                                                                                                                                                                                                                                                                                                                                                                                                                                                   |                                                                                                                                                                                                                                                                                                         |
|                                                                             | <input type="checkbox"/> Denmark,<br><input type="checkbox"/> Estonia,<br><input type="checkbox"/> Latvia,<br><input type="checkbox"/> Lithuania,<br><input type="checkbox"/> Finland,<br><input type="checkbox"/> Sweden                                                                                                                                                   | <input type="checkbox"/> Belgium,<br><input type="checkbox"/> Czech Republic<br><input type="checkbox"/> Germany,<br><input type="checkbox"/> Ireland,<br><input type="checkbox"/> Luxembourg,<br><input type="checkbox"/> Hungary,<br><input type="checkbox"/> Netherlands,<br><input type="checkbox"/> Austria,<br><input type="checkbox"/> Poland,<br><input type="checkbox"/> Romania,<br><input type="checkbox"/> Slovenia,<br><input type="checkbox"/> Slovakia,<br><input type="checkbox"/> United Kingdom | <input type="checkbox"/> Bulgaria,<br><input type="checkbox"/> Greece,<br><input checked="" type="checkbox"/> Spain,<br><input type="checkbox"/> France,<br><input type="checkbox"/> Italy,<br><input type="checkbox"/> Cyprus,<br><input type="checkbox"/> Malta,<br><input type="checkbox"/> Portugal |
|                                                                             | <input type="checkbox"/> Regional (specify)<br><input type="checkbox"/> Local (specify)                                                                                                                                                                                                                                                                                     |                                                                                                                                                                                                                                                                                                                                                                                                                                                                                                                   |                                                                                                                                                                                                                                                                                                         |
| Factors                                                                     | <input checked="" type="checkbox"/> Multiple species/items (specify) biological and chemical components<br><input type="checkbox"/> Single species/item (specify)                                                                                                                                                                                                           |                                                                                                                                                                                                                                                                                                                                                                                                                                                                                                                   |                                                                                                                                                                                                                                                                                                         |
| Crop                                                                        | <input type="checkbox"/> No specific crop(s)<br><input checked="" type="checkbox"/> Several crops (e.g. all cereals)<br><input type="checkbox"/> Single crop                                                                                                                                                                                                                |                                                                                                                                                                                                                                                                                                                                                                                                                                                                                                                   |                                                                                                                                                                                                                                                                                                         |
| Trait /treatment                                                            | <input checked="" type="checkbox"/> No specific traits/treatments<br><input type="checkbox"/> Several traits/treatments<br><input type="checkbox"/> Single trait/treatment                                                                                                                                                                                                  |                                                                                                                                                                                                                                                                                                                                                                                                                                                                                                                   |                                                                                                                                                                                                                                                                                                         |
| GMO                                                                         | <input checked="" type="checkbox"/> No GMO bias<br><input type="checkbox"/> GMO specific                                                                                                                                                                                                                                                                                    |                                                                                                                                                                                                                                                                                                                                                                                                                                                                                                                   |                                                                                                                                                                                                                                                                                                         |
| <b>METHODOLOGY</b>                                                          |                                                                                                                                                                                                                                                                                                                                                                             |                                                                                                                                                                                                                                                                                                                                                                                                                                                                                                                   |                                                                                                                                                                                                                                                                                                         |
| Observations                                                                | <input type="checkbox"/> Reported, verifiable methodology<br><input type="checkbox"/> Reported, unverifiable methodology<br><input type="checkbox"/> Unknown, unverifiable methodology                                                                                                                                                                                      |                                                                                                                                                                                                                                                                                                                                                                                                                                                                                                                   |                                                                                                                                                                                                                                                                                                         |
| Frequency                                                                   | <input type="checkbox"/> > 1 time/year                                                                                                                                                                                                                                                                                                                                      |                                                                                                                                                                                                                                                                                                                                                                                                                                                                                                                   |                                                                                                                                                                                                                                                                                                         |

|                                                                                                                         |                                                                                                                                                                                                                                                                                   |
|-------------------------------------------------------------------------------------------------------------------------|-----------------------------------------------------------------------------------------------------------------------------------------------------------------------------------------------------------------------------------------------------------------------------------|
|                                                                                                                         | <input type="checkbox"/> 1 time/year<br><input checked="" type="checkbox"/> < 1 time/year                                                                                                                                                                                         |
| Future                                                                                                                  | <input checked="" type="checkbox"/> For ≥ 5 years<br><input type="checkbox"/> between 1 and 5 years<br><input type="checkbox"/> no prospect                                                                                                                                       |
| Quality of performers                                                                                                   | <input checked="" type="checkbox"/> Trained, professionals<br><input type="checkbox"/> Trained, non-professionals – training by documentation, volunteers<br><input type="checkbox"/> Uncertain or not -specified                                                                 |
| Quality of data                                                                                                         | <input checked="" type="checkbox"/> Standard recording of raw data<br><input type="checkbox"/> Free recording of raw data<br><input type="checkbox"/> Anecdotic                                                                                                                   |
| Analysis                                                                                                                | <input type="checkbox"/> Reported, verifiable methodology<br><input type="checkbox"/> Reported, unverifiable methodology<br><input type="checkbox"/> Unknown, unverifiable methodology                                                                                            |
| Quality of analysis                                                                                                     | <input checked="" type="checkbox"/> Scientifically based<br><input type="checkbox"/> Indicative only<br><input type="checkbox"/> Unknown                                                                                                                                          |
| <b>REPORTING</b>                                                                                                        |                                                                                                                                                                                                                                                                                   |
| Language                                                                                                                | <input type="checkbox"/> Specify reporting language(s): Spanish                                                                                                                                                                                                                   |
| Availability                                                                                                            | <input checked="" type="checkbox"/> Scientific publication<br><input checked="" type="checkbox"/> Official report available on the internet or in other public forum<br><input type="checkbox"/> Official report available from network<br><input type="checkbox"/> Not available |
| Frequency                                                                                                               | <input type="checkbox"/> ≥ 1 time/year<br><input type="checkbox"/> < 1 time/year                                                                                                                                                                                                  |
| Historical reference                                                                                                    | <input checked="" type="checkbox"/> over ≥ 5 years<br><input type="checkbox"/> between 1 and 5 years<br><input type="checkbox"/> no historical analysis                                                                                                                           |
| <b>COMMENT(S)</b>                                                                                                       |                                                                                                                                                                                                                                                                                   |
| Information for professionals, not systematic coverage of all crops every year. Broad reporting of phytosanitary issues |                                                                                                                                                                                                                                                                                   |

## GSEN-09-0093.00.2 ES – AEAC.SV

| EuropaBio's coordinated approach to General Surveillance: Existing Networks |                                                                                                                                                                                                                                                                                                                                                                                                                                                                                                                                                                |                                                                                                                                                                                                                                                                                                                                                               |  |
|-----------------------------------------------------------------------------|----------------------------------------------------------------------------------------------------------------------------------------------------------------------------------------------------------------------------------------------------------------------------------------------------------------------------------------------------------------------------------------------------------------------------------------------------------------------------------------------------------------------------------------------------------------|---------------------------------------------------------------------------------------------------------------------------------------------------------------------------------------------------------------------------------------------------------------------------------------------------------------------------------------------------------------|--|
| <b>ORGANISATION</b>                                                         |                                                                                                                                                                                                                                                                                                                                                                                                                                                                                                                                                                |                                                                                                                                                                                                                                                                                                                                                               |  |
| EuropaBio reference                                                         | GS-EN-09-0093                                                                                                                                                                                                                                                                                                                                                                                                                                                                                                                                                  |                                                                                                                                                                                                                                                                                                                                                               |  |
| Official name of the Network                                                | <b>Asociación Española Agricultura de Conservación / Suelos Vivos</b>                                                                                                                                                                                                                                                                                                                                                                                                                                                                                          |                                                                                                                                                                                                                                                                                                                                                               |  |
| Other names                                                                 | AEAC/SV<br>Spanish Conservation Tillage association                                                                                                                                                                                                                                                                                                                                                                                                                                                                                                            |                                                                                                                                                                                                                                                                                                                                                               |  |
| Type of organisation                                                        | Professional<br>Founded 1995                                                                                                                                                                                                                                                                                                                                                                                                                                                                                                                                   |                                                                                                                                                                                                                                                                                                                                                               |  |
| Coordinates                                                                 | Center for Agricultural Research and Training "Alameda del Obispo"<br>Avd Menendez Pidal s / n<br><br>Fax: + 34 957 4221 68<br>Email: info[at]aeac-sv.org                                                                                                                                                                                                                                                                                                                                                                                                      |                                                                                                                                                                                                                                                                                                                                                               |  |
| Website                                                                     | <a href="http://www.agriculturadeconservacion.org/">http://www.agriculturadeconservacion.org/</a>                                                                                                                                                                                                                                                                                                                                                                                                                                                              |                                                                                                                                                                                                                                                                                                                                                               |  |
| Funding                                                                     | Membership: Farmers (48%), Technicians private companies (27%), official bodies (22%) & students (3%)                                                                                                                                                                                                                                                                                                                                                                                                                                                          |                                                                                                                                                                                                                                                                                                                                                               |  |
| Conflict of interest                                                        | -                                                                                                                                                                                                                                                                                                                                                                                                                                                                                                                                                              |                                                                                                                                                                                                                                                                                                                                                               |  |
| Part of other network(s)                                                    | European Conservation Agriculture Federation (ECAAF)                                                                                                                                                                                                                                                                                                                                                                                                                                                                                                           |                                                                                                                                                                                                                                                                                                                                                               |  |
| Grouping other network(s)                                                   | 11 regional associations                                                                                                                                                                                                                                                                                                                                                                                                                                                                                                                                       |                                                                                                                                                                                                                                                                                                                                                               |  |
| <b>MONITORING SUBJECT</b>                                                   |                                                                                                                                                                                                                                                                                                                                                                                                                                                                                                                                                                |                                                                                                                                                                                                                                                                                                                                                               |  |
| Description                                                                 | Promotion and research on conservation agriculture                                                                                                                                                                                                                                                                                                                                                                                                                                                                                                             |                                                                                                                                                                                                                                                                                                                                                               |  |
| Protection goal(s) and/or influencing factor(s)                             | <input checked="" type="checkbox"/> Protection goal<br><br><input type="checkbox"/> Biodiversity<br><input type="checkbox"/> Human Health<br><input type="checkbox"/> Animal Health<br><input type="checkbox"/> Plant Health<br><input checked="" type="checkbox"/> Soil function<br><input type="checkbox"/> Water quality<br><input checked="" type="checkbox"/> Sustainable Agriculture                                                                                                                                                                     | <input checked="" type="checkbox"/> Influencing factor<br><br><input checked="" type="checkbox"/> Agronomic practice<br><input type="checkbox"/> Plant protection<br><input type="checkbox"/> GMO cultivation<br><input type="checkbox"/> Environmental conditions                                                                                            |  |
| Duplication of Farmer's questionnaire                                       | <input type="checkbox"/> No duplication<br><input checked="" type="checkbox"/> Partly duplication<br><input type="checkbox"/> Complete duplication                                                                                                                                                                                                                                                                                                                                                                                                             |                                                                                                                                                                                                                                                                                                                                                               |  |
| <b>SPECIFICITY</b>                                                          |                                                                                                                                                                                                                                                                                                                                                                                                                                                                                                                                                                |                                                                                                                                                                                                                                                                                                                                                               |  |
| Geography                                                                   | <input type="checkbox"/> EU -wide<br><br><input type="checkbox"/> Zone A – North<br><input type="checkbox"/> Denmark,<br><input type="checkbox"/> Estonia,<br><input type="checkbox"/> Latvia,<br><input type="checkbox"/> Lithuania,<br><input type="checkbox"/> Finland,<br><input type="checkbox"/> Sweden                                                                                                                                                                                                                                                  |                                                                                                                                                                                                                                                                                                                                                               |  |
|                                                                             | <input type="checkbox"/> Zone B – Centre:<br><input type="checkbox"/> Belgium,<br><input type="checkbox"/> Czech Republic<br><input type="checkbox"/> Germany,<br><input type="checkbox"/> Ireland,<br><input type="checkbox"/> Luxembourg,<br><input type="checkbox"/> Hungary,<br><input type="checkbox"/> Netherlands,<br><input type="checkbox"/> Austria,<br><input type="checkbox"/> Poland,<br><input type="checkbox"/> Romania,<br><input type="checkbox"/> Slovenia,<br><input type="checkbox"/> Slovakia,<br><input type="checkbox"/> United Kingdom | <input checked="" type="checkbox"/> Zone C – South<br><input type="checkbox"/> Bulgaria,<br><input type="checkbox"/> Greece,<br><input checked="" type="checkbox"/> Spain,<br><input type="checkbox"/> France,<br><input type="checkbox"/> Italy,<br><input type="checkbox"/> Cyprus,<br><input type="checkbox"/> Malta,<br><input type="checkbox"/> Portugal |  |
|                                                                             | <input type="checkbox"/> Regional (specify)<br><input type="checkbox"/> Local (specify)                                                                                                                                                                                                                                                                                                                                                                                                                                                                        |                                                                                                                                                                                                                                                                                                                                                               |  |
| Factors                                                                     | <input checked="" type="checkbox"/> Multiple species/items (specify) agronomic practices<br><input type="checkbox"/> Single species/item (specify)                                                                                                                                                                                                                                                                                                                                                                                                             |                                                                                                                                                                                                                                                                                                                                                               |  |
| Crop                                                                        | <input type="checkbox"/> No specific crop(s)<br><input checked="" type="checkbox"/> Several crops (e.g. all cereals)<br><input type="checkbox"/> Single crop                                                                                                                                                                                                                                                                                                                                                                                                   |                                                                                                                                                                                                                                                                                                                                                               |  |
| Trait /treatment                                                            | <input checked="" type="checkbox"/> No specific traits/treatments<br><input type="checkbox"/> Several traits/treatments<br><input type="checkbox"/> Single trait/treatment                                                                                                                                                                                                                                                                                                                                                                                     |                                                                                                                                                                                                                                                                                                                                                               |  |
| GMO                                                                         | <input checked="" type="checkbox"/> No GMO bias<br><input type="checkbox"/> GMO specific                                                                                                                                                                                                                                                                                                                                                                                                                                                                       |                                                                                                                                                                                                                                                                                                                                                               |  |
| <b>METHODOLOGY</b>                                                          |                                                                                                                                                                                                                                                                                                                                                                                                                                                                                                                                                                |                                                                                                                                                                                                                                                                                                                                                               |  |



|                                                                                                                                                                          |                                                                                                                                                                                                                                                                                   |
|--------------------------------------------------------------------------------------------------------------------------------------------------------------------------|-----------------------------------------------------------------------------------------------------------------------------------------------------------------------------------------------------------------------------------------------------------------------------------|
| Observations                                                                                                                                                             | <input type="checkbox"/> Reported, verifiable methodology<br><input type="checkbox"/> Reported, unverifiable methodology<br><input type="checkbox"/> Unknown, unverifiable methodology                                                                                            |
| Frequency                                                                                                                                                                | <input type="checkbox"/> > 1 time/year<br><input type="checkbox"/> 1 time/year<br><input checked="" type="checkbox"/> < 1 time/year                                                                                                                                               |
| Future                                                                                                                                                                   | <input checked="" type="checkbox"/> For $\geq 5$ years<br><input type="checkbox"/> between 1 and 5 years<br><input type="checkbox"/> no prospect                                                                                                                                  |
| Quality of performers                                                                                                                                                    | <input checked="" type="checkbox"/> Trained, professionals<br><input type="checkbox"/> Trained, non-professionals – training by documentation, volunteers<br><input type="checkbox"/> Uncertain or not -specified                                                                 |
| Quality of data                                                                                                                                                          | <input checked="" type="checkbox"/> Standard recording of raw data<br><input type="checkbox"/> Free recording of raw data<br><input type="checkbox"/> Anecdotic                                                                                                                   |
| Analysis                                                                                                                                                                 | <input type="checkbox"/> Reported, verifiable methodology<br><input type="checkbox"/> Reported, unverifiable methodology<br><input type="checkbox"/> Unknown, unverifiable methodology                                                                                            |
| Quality of analysis                                                                                                                                                      | <input checked="" type="checkbox"/> Scientifically based<br><input type="checkbox"/> Indicative only<br><input type="checkbox"/> Unknown                                                                                                                                          |
| <b>REPORTING</b>                                                                                                                                                         |                                                                                                                                                                                                                                                                                   |
| Language                                                                                                                                                                 | <input type="checkbox"/> Specify reporting language(s): Spanish                                                                                                                                                                                                                   |
| Availability                                                                                                                                                             | <input checked="" type="checkbox"/> Scientific publication<br><input checked="" type="checkbox"/> Official report available on the internet or in other public forum<br><input type="checkbox"/> Official report available from network<br><input type="checkbox"/> Not available |
| Frequency                                                                                                                                                                | <input type="checkbox"/> $\geq 1$ time/year<br><input type="checkbox"/> < 1 time/year                                                                                                                                                                                             |
| Historical reference                                                                                                                                                     | <input checked="" type="checkbox"/> over $\geq 5$ years<br><input type="checkbox"/> between 1 and 5 years<br><input type="checkbox"/> no historical analysis                                                                                                                      |
| <b>COMMENT(S)</b>                                                                                                                                                        |                                                                                                                                                                                                                                                                                   |
| Mostly directed to promotion and education, with some research projects. Reports on scientific research limited to project sheets, could lead to full scientific papers. |                                                                                                                                                                                                                                                                                   |

## GSEN-09-0094.00.2 ES – AEPLA

| EuropaBio's coordinated approach to General Surveillance: Existing Networks |                                                                                                                                                                                                                                                                                                                                                           |                                                                                                                                                                                                                                                                                                                                                                                                                                                                                                                   |                                                                                                                                                                                                                                                                                                         |
|-----------------------------------------------------------------------------|-----------------------------------------------------------------------------------------------------------------------------------------------------------------------------------------------------------------------------------------------------------------------------------------------------------------------------------------------------------|-------------------------------------------------------------------------------------------------------------------------------------------------------------------------------------------------------------------------------------------------------------------------------------------------------------------------------------------------------------------------------------------------------------------------------------------------------------------------------------------------------------------|---------------------------------------------------------------------------------------------------------------------------------------------------------------------------------------------------------------------------------------------------------------------------------------------------------|
| <b>ORGANISATION</b>                                                         |                                                                                                                                                                                                                                                                                                                                                           |                                                                                                                                                                                                                                                                                                                                                                                                                                                                                                                   |                                                                                                                                                                                                                                                                                                         |
| EuropaBio reference                                                         | GS-EN-09-0094                                                                                                                                                                                                                                                                                                                                             |                                                                                                                                                                                                                                                                                                                                                                                                                                                                                                                   |                                                                                                                                                                                                                                                                                                         |
| Official name of the Network                                                | <b>Asociación Empresarial para la Protección de la Plantas</b>                                                                                                                                                                                                                                                                                            |                                                                                                                                                                                                                                                                                                                                                                                                                                                                                                                   |                                                                                                                                                                                                                                                                                                         |
| Other names                                                                 | AEPLA<br>Plant Protection Products Manufacturers Association                                                                                                                                                                                                                                                                                              |                                                                                                                                                                                                                                                                                                                                                                                                                                                                                                                   |                                                                                                                                                                                                                                                                                                         |
| Type of organisation                                                        | Professional<br>Founded (unknown)                                                                                                                                                                                                                                                                                                                         |                                                                                                                                                                                                                                                                                                                                                                                                                                                                                                                   |                                                                                                                                                                                                                                                                                                         |
| Coordinates                                                                 | Plaza de Castilla, 3. Floor 21 E2<br>28046 Madrid<br><br>Fax: 91 319 77 34                                                                                                                                                                                                                                                                                |                                                                                                                                                                                                                                                                                                                                                                                                                                                                                                                   |                                                                                                                                                                                                                                                                                                         |
| Website                                                                     | <a href="http://www.aepla.es">http://www.aepla.es</a>                                                                                                                                                                                                                                                                                                     |                                                                                                                                                                                                                                                                                                                                                                                                                                                                                                                   |                                                                                                                                                                                                                                                                                                         |
| Funding                                                                     | 26 partner companies                                                                                                                                                                                                                                                                                                                                      |                                                                                                                                                                                                                                                                                                                                                                                                                                                                                                                   |                                                                                                                                                                                                                                                                                                         |
| Conflict of interest                                                        | -                                                                                                                                                                                                                                                                                                                                                         |                                                                                                                                                                                                                                                                                                                                                                                                                                                                                                                   |                                                                                                                                                                                                                                                                                                         |
| Part of other network(s)                                                    |                                                                                                                                                                                                                                                                                                                                                           |                                                                                                                                                                                                                                                                                                                                                                                                                                                                                                                   |                                                                                                                                                                                                                                                                                                         |
| Grouping other network(s)                                                   | 26 partner companies                                                                                                                                                                                                                                                                                                                                      |                                                                                                                                                                                                                                                                                                                                                                                                                                                                                                                   |                                                                                                                                                                                                                                                                                                         |
| <b>MONITORING SUBJECT</b>                                                   |                                                                                                                                                                                                                                                                                                                                                           |                                                                                                                                                                                                                                                                                                                                                                                                                                                                                                                   |                                                                                                                                                                                                                                                                                                         |
| Description                                                                 | Promotion and research on conservation agriculture                                                                                                                                                                                                                                                                                                        |                                                                                                                                                                                                                                                                                                                                                                                                                                                                                                                   |                                                                                                                                                                                                                                                                                                         |
| Protection goal(s) and/or influencing factor(s)                             | <input type="checkbox"/> Protection goal<br><br><input type="checkbox"/> Biodiversity<br><input type="checkbox"/> Human Health<br><input type="checkbox"/> Animal Health<br><input type="checkbox"/> Plant Health<br><input type="checkbox"/> Soil function<br><input type="checkbox"/> Water quality<br><input type="checkbox"/> Sustainable Agriculture | <input checked="" type="checkbox"/> Influencing factor<br><br><input type="checkbox"/> Agronomic practice<br><input checked="" type="checkbox"/> Plant protection<br><input type="checkbox"/> GMO cultivation<br><input type="checkbox"/> Environmental conditions                                                                                                                                                                                                                                                |                                                                                                                                                                                                                                                                                                         |
| Duplication of Farmer's questionnaire                                       | <input type="checkbox"/> No duplication<br><input checked="" type="checkbox"/> Partly duplication<br><input type="checkbox"/> Complete duplication                                                                                                                                                                                                        |                                                                                                                                                                                                                                                                                                                                                                                                                                                                                                                   |                                                                                                                                                                                                                                                                                                         |
| <b>SPECIFICITY</b>                                                          |                                                                                                                                                                                                                                                                                                                                                           |                                                                                                                                                                                                                                                                                                                                                                                                                                                                                                                   |                                                                                                                                                                                                                                                                                                         |
| Geography                                                                   | <input type="checkbox"/> EU -wide<br><br><input type="checkbox"/> Zone A – North<br><input type="checkbox"/> Zone B – Centre:<br><input type="checkbox"/> Zone C – South                                                                                                                                                                                  |                                                                                                                                                                                                                                                                                                                                                                                                                                                                                                                   |                                                                                                                                                                                                                                                                                                         |
|                                                                             | <input type="checkbox"/> Denmark,<br><input type="checkbox"/> Estonia,<br><input type="checkbox"/> Latvia,<br><input type="checkbox"/> Lithuania,<br><input type="checkbox"/> Finland,<br><input type="checkbox"/> Sweden                                                                                                                                 | <input type="checkbox"/> Belgium,<br><input type="checkbox"/> Czech Republic<br><input type="checkbox"/> Germany,<br><input type="checkbox"/> Ireland,<br><input type="checkbox"/> Luxembourg,<br><input type="checkbox"/> Hungary,<br><input type="checkbox"/> Netherlands,<br><input type="checkbox"/> Austria,<br><input type="checkbox"/> Poland,<br><input type="checkbox"/> Romania,<br><input type="checkbox"/> Slovenia,<br><input type="checkbox"/> Slovakia,<br><input type="checkbox"/> United Kingdom | <input type="checkbox"/> Bulgaria,<br><input type="checkbox"/> Greece,<br><input checked="" type="checkbox"/> Spain,<br><input type="checkbox"/> France,<br><input type="checkbox"/> Italy,<br><input type="checkbox"/> Cyprus,<br><input type="checkbox"/> Malta,<br><input type="checkbox"/> Portugal |
|                                                                             | <input type="checkbox"/> Regional (specify)<br><input type="checkbox"/> Local (specify)                                                                                                                                                                                                                                                                   |                                                                                                                                                                                                                                                                                                                                                                                                                                                                                                                   |                                                                                                                                                                                                                                                                                                         |
| Factors                                                                     | <input checked="" type="checkbox"/> Multiple species/items (specify) use of Plant protection products<br><input type="checkbox"/> Single species/item (specify)                                                                                                                                                                                           |                                                                                                                                                                                                                                                                                                                                                                                                                                                                                                                   |                                                                                                                                                                                                                                                                                                         |
| Crop                                                                        | <input type="checkbox"/> No specific crop(s)<br><input checked="" type="checkbox"/> Several crops (e.g. all cereals)<br><input type="checkbox"/> Single crop                                                                                                                                                                                              |                                                                                                                                                                                                                                                                                                                                                                                                                                                                                                                   |                                                                                                                                                                                                                                                                                                         |
| Trait /treatment                                                            | <input checked="" type="checkbox"/> No specific traits/treatments<br><input type="checkbox"/> Several traits/treatments<br><input type="checkbox"/> Single trait/treatment                                                                                                                                                                                |                                                                                                                                                                                                                                                                                                                                                                                                                                                                                                                   |                                                                                                                                                                                                                                                                                                         |
| GMO                                                                         | <input checked="" type="checkbox"/> No GMO bias<br><input type="checkbox"/> GMO specific                                                                                                                                                                                                                                                                  |                                                                                                                                                                                                                                                                                                                                                                                                                                                                                                                   |                                                                                                                                                                                                                                                                                                         |
| <b>METHODOLOGY</b>                                                          |                                                                                                                                                                                                                                                                                                                                                           |                                                                                                                                                                                                                                                                                                                                                                                                                                                                                                                   |                                                                                                                                                                                                                                                                                                         |
| Observations                                                                | <input type="checkbox"/> Reported, verifiable methodology                                                                                                                                                                                                                                                                                                 |                                                                                                                                                                                                                                                                                                                                                                                                                                                                                                                   |                                                                                                                                                                                                                                                                                                         |

|                                                                            |                                                                                                                                                                                                                                                                        |
|----------------------------------------------------------------------------|------------------------------------------------------------------------------------------------------------------------------------------------------------------------------------------------------------------------------------------------------------------------|
|                                                                            | <input type="checkbox"/> Reported, unverifiable methodology<br><input type="checkbox"/> Unknown, unverifiable methodology                                                                                                                                              |
| Frequency                                                                  | <input type="checkbox"/> > 1 time/year<br><input type="checkbox"/> 1 time/year<br><input checked="" type="checkbox"/> < 1 time/year                                                                                                                                    |
| Future                                                                     | <input checked="" type="checkbox"/> For ≥ 5 years<br><input type="checkbox"/> between 1 and 5 years<br><input type="checkbox"/> no prospect                                                                                                                            |
| Quality of performers                                                      | <input checked="" type="checkbox"/> Trained, professionals<br><input type="checkbox"/> Trained, non-professionals – training by documentation, volunteers<br><input type="checkbox"/> Uncertain or not -specified                                                      |
| Quality of data                                                            | <input checked="" type="checkbox"/> Standard recording of raw data<br><input type="checkbox"/> Free recording of raw data<br><input type="checkbox"/> Anecdotic                                                                                                        |
| Analysis                                                                   | <input type="checkbox"/> Reported, verifiable methodology<br><input type="checkbox"/> Reported, unverifiable methodology<br><input type="checkbox"/> Unknown, unverifiable methodology                                                                                 |
| Quality of analysis                                                        | <input checked="" type="checkbox"/> Scientifically based<br><input type="checkbox"/> Indicative only<br><input type="checkbox"/> Unknown                                                                                                                               |
| <b>REPORTING</b>                                                           |                                                                                                                                                                                                                                                                        |
| Language                                                                   | Specify reporting language(s): Spanish                                                                                                                                                                                                                                 |
| Availability                                                               | <input type="checkbox"/> Scientific publication<br><input checked="" type="checkbox"/> Official report available on the internet or in other public forum<br><input type="checkbox"/> Official report available from network<br><input type="checkbox"/> Not available |
| Frequency                                                                  | <input type="checkbox"/> ≥ 1 time/year<br><input type="checkbox"/> < 1 time/year                                                                                                                                                                                       |
| Historical reference                                                       | <input type="checkbox"/> over ≥ 5 years<br><input type="checkbox"/> between 1 and 5 years<br><input type="checkbox"/> no historical analysis                                                                                                                           |
| <b>COMMENT(S)</b>                                                          |                                                                                                                                                                                                                                                                        |
| Mostly directed to promotion and advocacy. Some information on use of PPP. |                                                                                                                                                                                                                                                                        |

## GSEN-09-0096.00.2 ES – MARM Biodiversidad

| EuropaBio's coordinated approach to General Surveillance: Existing Networks |                                                                                                                                                                                                                                                                                                                                                                                          |                                                                                                                                                                                                                                                                                                                                                                                                                                                                                                                   |                                                                                                                                                                                                                                                                                                         |
|-----------------------------------------------------------------------------|------------------------------------------------------------------------------------------------------------------------------------------------------------------------------------------------------------------------------------------------------------------------------------------------------------------------------------------------------------------------------------------|-------------------------------------------------------------------------------------------------------------------------------------------------------------------------------------------------------------------------------------------------------------------------------------------------------------------------------------------------------------------------------------------------------------------------------------------------------------------------------------------------------------------|---------------------------------------------------------------------------------------------------------------------------------------------------------------------------------------------------------------------------------------------------------------------------------------------------------|
| <b>ORGANISATION</b>                                                         |                                                                                                                                                                                                                                                                                                                                                                                          |                                                                                                                                                                                                                                                                                                                                                                                                                                                                                                                   |                                                                                                                                                                                                                                                                                                         |
| EuropaBio reference                                                         | GS-EN-09-0096                                                                                                                                                                                                                                                                                                                                                                            |                                                                                                                                                                                                                                                                                                                                                                                                                                                                                                                   |                                                                                                                                                                                                                                                                                                         |
| Official name of the Network                                                | <b>Ministerio de Medio Ambiente y Medio Rural y Marino Biodiversidad</b>                                                                                                                                                                                                                                                                                                                 |                                                                                                                                                                                                                                                                                                                                                                                                                                                                                                                   |                                                                                                                                                                                                                                                                                                         |
| Other names                                                                 | Ministry of Agriculture, Food and Environment: maps on biodiversity                                                                                                                                                                                                                                                                                                                      |                                                                                                                                                                                                                                                                                                                                                                                                                                                                                                                   |                                                                                                                                                                                                                                                                                                         |
| Type of organisation                                                        | Governmental<br>Founded (unknown)                                                                                                                                                                                                                                                                                                                                                        |                                                                                                                                                                                                                                                                                                                                                                                                                                                                                                                   |                                                                                                                                                                                                                                                                                                         |
| Coordinates                                                                 | Plaza de San Juan de la Cruz,<br>s/n 28071- Madrid                                                                                                                                                                                                                                                                                                                                       |                                                                                                                                                                                                                                                                                                                                                                                                                                                                                                                   |                                                                                                                                                                                                                                                                                                         |
| Website                                                                     | <a href="http://www.magrama.gob.es/es/biodiversidad/temas/default.aspx">http://www.magrama.gob.es/es/biodiversidad/temas/default.aspx</a>                                                                                                                                                                                                                                                |                                                                                                                                                                                                                                                                                                                                                                                                                                                                                                                   |                                                                                                                                                                                                                                                                                                         |
| Funding                                                                     | public                                                                                                                                                                                                                                                                                                                                                                                   |                                                                                                                                                                                                                                                                                                                                                                                                                                                                                                                   |                                                                                                                                                                                                                                                                                                         |
| Conflict of interest                                                        | -                                                                                                                                                                                                                                                                                                                                                                                        |                                                                                                                                                                                                                                                                                                                                                                                                                                                                                                                   |                                                                                                                                                                                                                                                                                                         |
| Part of other network(s)                                                    | -                                                                                                                                                                                                                                                                                                                                                                                        |                                                                                                                                                                                                                                                                                                                                                                                                                                                                                                                   |                                                                                                                                                                                                                                                                                                         |
| Grouping other network(s)                                                   | Cooperation of several departments of the Ministry and NGOs                                                                                                                                                                                                                                                                                                                              |                                                                                                                                                                                                                                                                                                                                                                                                                                                                                                                   |                                                                                                                                                                                                                                                                                                         |
| <b>MONITORING SUBJECT</b>                                                   |                                                                                                                                                                                                                                                                                                                                                                                          |                                                                                                                                                                                                                                                                                                                                                                                                                                                                                                                   |                                                                                                                                                                                                                                                                                                         |
| Description                                                                 | Statistics on biodiversity, endangered species, sustainability.<br>Aims to inform on Spain's Environmental Profile, its status and evolution.                                                                                                                                                                                                                                            |                                                                                                                                                                                                                                                                                                                                                                                                                                                                                                                   |                                                                                                                                                                                                                                                                                                         |
| Protection goal(s) and/or influencing factor(s)                             | <input checked="" type="checkbox"/> Protection goal<br><br><input checked="" type="checkbox"/> Biodiversity: general<br><input type="checkbox"/> Human Health<br><input type="checkbox"/> Animal Health<br><input type="checkbox"/> Plant Health<br><input type="checkbox"/> Soil function<br><input type="checkbox"/> Water quality<br><input type="checkbox"/> Sustainable Agriculture | <input type="checkbox"/> Influencing factor<br><br><input type="checkbox"/> Agronomic practice<br><input type="checkbox"/> Plant protection<br><input type="checkbox"/> GMO cultivation<br><input type="checkbox"/> Environmental conditions                                                                                                                                                                                                                                                                      |                                                                                                                                                                                                                                                                                                         |
| Duplication of Farmer's questionnaire                                       | <input checked="" type="checkbox"/> No duplication<br><input type="checkbox"/> Partly duplication<br><input type="checkbox"/> Complete duplication                                                                                                                                                                                                                                       |                                                                                                                                                                                                                                                                                                                                                                                                                                                                                                                   |                                                                                                                                                                                                                                                                                                         |
| <b>SPECIFICITY</b>                                                          |                                                                                                                                                                                                                                                                                                                                                                                          |                                                                                                                                                                                                                                                                                                                                                                                                                                                                                                                   |                                                                                                                                                                                                                                                                                                         |
| Geography                                                                   | <input type="checkbox"/> EU -wide<br><br><input type="checkbox"/> Zone A – North<br><input type="checkbox"/> Zone B – Centre:<br><input type="checkbox"/> Zone C – South                                                                                                                                                                                                                 |                                                                                                                                                                                                                                                                                                                                                                                                                                                                                                                   |                                                                                                                                                                                                                                                                                                         |
|                                                                             | <input type="checkbox"/> Denmark,<br><input type="checkbox"/> Estonia,<br><input type="checkbox"/> Latvia,<br><input type="checkbox"/> Lithuania,<br><input type="checkbox"/> Finland,<br><input type="checkbox"/> Sweden                                                                                                                                                                | <input type="checkbox"/> Belgium,<br><input type="checkbox"/> Czech Republic<br><input type="checkbox"/> Germany,<br><input type="checkbox"/> Ireland,<br><input type="checkbox"/> Luxembourg,<br><input type="checkbox"/> Hungary,<br><input type="checkbox"/> Netherlands,<br><input type="checkbox"/> Austria,<br><input type="checkbox"/> Poland,<br><input type="checkbox"/> Romania,<br><input type="checkbox"/> Slovenia,<br><input type="checkbox"/> Slovakia,<br><input type="checkbox"/> United Kingdom | <input type="checkbox"/> Bulgaria,<br><input type="checkbox"/> Greece,<br><input checked="" type="checkbox"/> Spain,<br><input type="checkbox"/> France,<br><input type="checkbox"/> Italy,<br><input type="checkbox"/> Cyprus,<br><input type="checkbox"/> Malta,<br><input type="checkbox"/> Portugal |
|                                                                             | <input type="checkbox"/> Regional (specify)<br><input type="checkbox"/> Local (specify)                                                                                                                                                                                                                                                                                                  |                                                                                                                                                                                                                                                                                                                                                                                                                                                                                                                   |                                                                                                                                                                                                                                                                                                         |
| Factors                                                                     | <input checked="" type="checkbox"/> Multiple species/items (specify): biodiversity, environment in general<br><input type="checkbox"/> Single species/item (specify)                                                                                                                                                                                                                     |                                                                                                                                                                                                                                                                                                                                                                                                                                                                                                                   |                                                                                                                                                                                                                                                                                                         |
| Crop                                                                        | <input checked="" type="checkbox"/> No specific crop(s)<br><input type="checkbox"/> Several crops (e.g. all cereals)<br><input type="checkbox"/> Single crop                                                                                                                                                                                                                             |                                                                                                                                                                                                                                                                                                                                                                                                                                                                                                                   |                                                                                                                                                                                                                                                                                                         |
| Trait /treatment                                                            | <input checked="" type="checkbox"/> No specific traits/treatments<br><input type="checkbox"/> Several traits/treatments<br><input type="checkbox"/> Single trait/treatment                                                                                                                                                                                                               |                                                                                                                                                                                                                                                                                                                                                                                                                                                                                                                   |                                                                                                                                                                                                                                                                                                         |
| GMO                                                                         | <input checked="" type="checkbox"/> No GMO bias<br><input type="checkbox"/> GMO specific                                                                                                                                                                                                                                                                                                 |                                                                                                                                                                                                                                                                                                                                                                                                                                                                                                                   |                                                                                                                                                                                                                                                                                                         |
| <b>METHODOLOGY</b>                                                          |                                                                                                                                                                                                                                                                                                                                                                                          |                                                                                                                                                                                                                                                                                                                                                                                                                                                                                                                   |                                                                                                                                                                                                                                                                                                         |
| Observations                                                                | <input type="checkbox"/> Reported, verifiable methodology<br><input checked="" type="checkbox"/> Reported, unverifiable methodology                                                                                                                                                                                                                                                      |                                                                                                                                                                                                                                                                                                                                                                                                                                                                                                                   |                                                                                                                                                                                                                                                                                                         |

|                                                                                                                                                                                                                                 |                                                                                                                                                                                                                                                                                              |
|---------------------------------------------------------------------------------------------------------------------------------------------------------------------------------------------------------------------------------|----------------------------------------------------------------------------------------------------------------------------------------------------------------------------------------------------------------------------------------------------------------------------------------------|
|                                                                                                                                                                                                                                 | <input type="checkbox"/> Unknown, unverifiable methodology                                                                                                                                                                                                                                   |
| Frequency                                                                                                                                                                                                                       | <input type="checkbox"/> > 1 time/year<br><input checked="" type="checkbox"/> 1 time/year: 2004 & 2005<br><input type="checkbox"/> < 1 time/year                                                                                                                                             |
| Future                                                                                                                                                                                                                          | <input type="checkbox"/> For $\geq 5$ years<br><input type="checkbox"/> between 1 and 5 years<br><input type="checkbox"/> no prospect                                                                                                                                                        |
| Quality of performers                                                                                                                                                                                                           | <input checked="" type="checkbox"/> Trained, professionals<br><input type="checkbox"/> Trained, non-professionals – training by documentation, volunteers<br><input type="checkbox"/> Uncertain or not -specified                                                                            |
| Quality of data                                                                                                                                                                                                                 | <input checked="" type="checkbox"/> Standard recording of raw data<br><input type="checkbox"/> Free recording of raw data<br><input type="checkbox"/> Anecdotic                                                                                                                              |
| Analysis                                                                                                                                                                                                                        | <input checked="" type="checkbox"/> Reported, verifiable methodology<br><input type="checkbox"/> Reported, unverifiable methodology<br><input type="checkbox"/> Unknown, unverifiable methodology                                                                                            |
| Quality of analysis                                                                                                                                                                                                             | <input checked="" type="checkbox"/> Scientifically based<br><input type="checkbox"/> Indicative only<br><input type="checkbox"/> Unknown                                                                                                                                                     |
| <b>REPORTING</b>                                                                                                                                                                                                                |                                                                                                                                                                                                                                                                                              |
| Language                                                                                                                                                                                                                        | Specify reporting language(s): Spanish                                                                                                                                                                                                                                                       |
| Availability                                                                                                                                                                                                                    | <input type="checkbox"/> Scientific publication<br><input checked="" type="checkbox"/> Official report available on the internet or in other public forum: only the 2005 report<br><input type="checkbox"/> Official report available from network<br><input type="checkbox"/> Not available |
| Frequency                                                                                                                                                                                                                       | <input checked="" type="checkbox"/> $\geq 1$ time/year – Yearly reports only available for 2004 and 2005<br><input type="checkbox"/> < 1 time/year –                                                                                                                                         |
| Historical reference                                                                                                                                                                                                            | <input checked="" type="checkbox"/> over $\geq 5$ years: same subjects analyzed in the past in different formats.<br><input type="checkbox"/> between 1 and 5 years<br><input type="checkbox"/> no historical analysis                                                                       |
| <b>COMMENT(S)</b>                                                                                                                                                                                                               |                                                                                                                                                                                                                                                                                              |
| Network using environmental indicators to describe the status and evolution of Spain's environment. General information per Autonomous region and/or province, most information in maps and different data formats (databases). |                                                                                                                                                                                                                                                                                              |

## GSEN-09-0097.00.2 ES – MARM GMO

| EuropaBio's coordinated approach to General Surveillance: Existing Networks |                                                                                                                                                                                                                                                                                                                                                                |                                                                                                                                                                                                                                                                                                                                                                                                                                                                                                                   |                                                                                                                                                                                                                                                                                                         |
|-----------------------------------------------------------------------------|----------------------------------------------------------------------------------------------------------------------------------------------------------------------------------------------------------------------------------------------------------------------------------------------------------------------------------------------------------------|-------------------------------------------------------------------------------------------------------------------------------------------------------------------------------------------------------------------------------------------------------------------------------------------------------------------------------------------------------------------------------------------------------------------------------------------------------------------------------------------------------------------|---------------------------------------------------------------------------------------------------------------------------------------------------------------------------------------------------------------------------------------------------------------------------------------------------------|
| <b>ORGANISATION</b>                                                         |                                                                                                                                                                                                                                                                                                                                                                |                                                                                                                                                                                                                                                                                                                                                                                                                                                                                                                   |                                                                                                                                                                                                                                                                                                         |
| EuropaBio reference                                                         | GS-EN-09-0097                                                                                                                                                                                                                                                                                                                                                  |                                                                                                                                                                                                                                                                                                                                                                                                                                                                                                                   |                                                                                                                                                                                                                                                                                                         |
| Official name of the Network                                                | <b>Ministerio de Medio Ambiente y Medio Rural y Marino</b><br><b>OMG Registro de Variedades</b><br><b>2013</b><br>Ministerio de Agricultura, Alimentación y Medio Ambiente                                                                                                                                                                                     |                                                                                                                                                                                                                                                                                                                                                                                                                                                                                                                   |                                                                                                                                                                                                                                                                                                         |
| Other names                                                                 | Ministry of Agriculture, Food and Environment: GMO register                                                                                                                                                                                                                                                                                                    |                                                                                                                                                                                                                                                                                                                                                                                                                                                                                                                   |                                                                                                                                                                                                                                                                                                         |
| Type of organisation                                                        | Governmental                                                                                                                                                                                                                                                                                                                                                   |                                                                                                                                                                                                                                                                                                                                                                                                                                                                                                                   |                                                                                                                                                                                                                                                                                                         |
| Coordinates                                                                 | Plaza de San Juan de la Cruz,<br>s/n 28071- Madrid                                                                                                                                                                                                                                                                                                             |                                                                                                                                                                                                                                                                                                                                                                                                                                                                                                                   |                                                                                                                                                                                                                                                                                                         |
| Website                                                                     | <a href="http://www.mma.es/portal/secciones/calidad_contaminacion/omg/registro_variedades/index.htm">http://www.mma.es/portal/secciones/calidad_contaminacion/omg/registro_variedades/index.htm</a><br><a href="http://www.magrama.gob.es/app/regVar/default.aspx">http://www.magrama.gob.es/app/regVar/default.aspx</a>                                       |                                                                                                                                                                                                                                                                                                                                                                                                                                                                                                                   |                                                                                                                                                                                                                                                                                                         |
| Funding                                                                     | public                                                                                                                                                                                                                                                                                                                                                         |                                                                                                                                                                                                                                                                                                                                                                                                                                                                                                                   |                                                                                                                                                                                                                                                                                                         |
| Conflict of interest                                                        | -                                                                                                                                                                                                                                                                                                                                                              |                                                                                                                                                                                                                                                                                                                                                                                                                                                                                                                   |                                                                                                                                                                                                                                                                                                         |
| Part of other network(s)                                                    | -                                                                                                                                                                                                                                                                                                                                                              |                                                                                                                                                                                                                                                                                                                                                                                                                                                                                                                   |                                                                                                                                                                                                                                                                                                         |
| Grouping other network(s)                                                   |                                                                                                                                                                                                                                                                                                                                                                |                                                                                                                                                                                                                                                                                                                                                                                                                                                                                                                   |                                                                                                                                                                                                                                                                                                         |
| <b>MONITORING SUBJECT</b>                                                   |                                                                                                                                                                                                                                                                                                                                                                |                                                                                                                                                                                                                                                                                                                                                                                                                                                                                                                   |                                                                                                                                                                                                                                                                                                         |
| Description                                                                 | GMO variety register.                                                                                                                                                                                                                                                                                                                                          |                                                                                                                                                                                                                                                                                                                                                                                                                                                                                                                   |                                                                                                                                                                                                                                                                                                         |
| Protection goal(s) and/or influencing factor(s)                             | <input type="checkbox"/> Protection goal<br><input type="checkbox"/> Biodiversity: general<br><input type="checkbox"/> Human Health<br><input type="checkbox"/> Animal Health<br><input type="checkbox"/> Plant Health<br><input type="checkbox"/> Soil function<br><input type="checkbox"/> Water quality<br><input type="checkbox"/> Sustainable Agriculture | <input checked="" type="checkbox"/> Influencing factor<br><input type="checkbox"/> Agronomic practice<br><input type="checkbox"/> Plant protection<br><input checked="" type="checkbox"/> GMO cultivation<br><input type="checkbox"/> Environmental conditions                                                                                                                                                                                                                                                    |                                                                                                                                                                                                                                                                                                         |
| Duplication of Farmer's questionnaire                                       | <input type="checkbox"/> No duplication<br><input checked="" type="checkbox"/> Partly duplication<br><input type="checkbox"/> Complete duplication                                                                                                                                                                                                             |                                                                                                                                                                                                                                                                                                                                                                                                                                                                                                                   |                                                                                                                                                                                                                                                                                                         |
| <b>SPECIFICITY</b>                                                          |                                                                                                                                                                                                                                                                                                                                                                |                                                                                                                                                                                                                                                                                                                                                                                                                                                                                                                   |                                                                                                                                                                                                                                                                                                         |
| Geography                                                                   | <input type="checkbox"/> EU -wide                                                                                                                                                                                                                                                                                                                              |                                                                                                                                                                                                                                                                                                                                                                                                                                                                                                                   |                                                                                                                                                                                                                                                                                                         |
|                                                                             | <input type="checkbox"/> Zone A – North                                                                                                                                                                                                                                                                                                                        | <input type="checkbox"/> Zone B – Centre:                                                                                                                                                                                                                                                                                                                                                                                                                                                                         | <input type="checkbox"/> Zone C – South                                                                                                                                                                                                                                                                 |
|                                                                             | <input type="checkbox"/> Denmark,<br><input type="checkbox"/> Estonia,<br><input type="checkbox"/> Latvia,<br><input type="checkbox"/> Lithuania,<br><input type="checkbox"/> Finland,<br><input type="checkbox"/> Sweden                                                                                                                                      | <input type="checkbox"/> Belgium,<br><input type="checkbox"/> Czech Republic<br><input type="checkbox"/> Germany,<br><input type="checkbox"/> Ireland,<br><input type="checkbox"/> Luxembourg,<br><input type="checkbox"/> Hungary,<br><input type="checkbox"/> Netherlands,<br><input type="checkbox"/> Austria,<br><input type="checkbox"/> Poland,<br><input type="checkbox"/> Romania,<br><input type="checkbox"/> Slovenia,<br><input type="checkbox"/> Slovakia,<br><input type="checkbox"/> United Kingdom | <input type="checkbox"/> Bulgaria,<br><input type="checkbox"/> Greece,<br><input checked="" type="checkbox"/> Spain,<br><input type="checkbox"/> France,<br><input type="checkbox"/> Italy,<br><input type="checkbox"/> Cyprus,<br><input type="checkbox"/> Malta,<br><input type="checkbox"/> Portugal |
|                                                                             | <input type="checkbox"/> Regional (specify)<br><input type="checkbox"/> Local (specify)                                                                                                                                                                                                                                                                        |                                                                                                                                                                                                                                                                                                                                                                                                                                                                                                                   |                                                                                                                                                                                                                                                                                                         |
| Factors                                                                     | <input checked="" type="checkbox"/> Multiple species/items (specify): GMO registration<br><input type="checkbox"/> Single species/item (specify)                                                                                                                                                                                                               |                                                                                                                                                                                                                                                                                                                                                                                                                                                                                                                   |                                                                                                                                                                                                                                                                                                         |
| Crop                                                                        | <input checked="" type="checkbox"/> No specific crop(s)<br><input type="checkbox"/> Several crops (e.g. all cereals)<br><input type="checkbox"/> Single crop                                                                                                                                                                                                   |                                                                                                                                                                                                                                                                                                                                                                                                                                                                                                                   |                                                                                                                                                                                                                                                                                                         |
| Trait /treatment                                                            | <input checked="" type="checkbox"/> No specific traits/treatments<br><input type="checkbox"/> Several traits/treatments<br><input type="checkbox"/> Single trait/treatment                                                                                                                                                                                     |                                                                                                                                                                                                                                                                                                                                                                                                                                                                                                                   |                                                                                                                                                                                                                                                                                                         |
| GMO                                                                         | <input checked="" type="checkbox"/> No GMO bias<br><input type="checkbox"/> GMO specific                                                                                                                                                                                                                                                                       |                                                                                                                                                                                                                                                                                                                                                                                                                                                                                                                   |                                                                                                                                                                                                                                                                                                         |
| <b>METHODOLOGY</b>                                                          |                                                                                                                                                                                                                                                                                                                                                                |                                                                                                                                                                                                                                                                                                                                                                                                                                                                                                                   |                                                                                                                                                                                                                                                                                                         |
| Observations                                                                | <input checked="" type="checkbox"/> Reported, verifiable methodology                                                                                                                                                                                                                                                                                           |                                                                                                                                                                                                                                                                                                                                                                                                                                                                                                                   |                                                                                                                                                                                                                                                                                                         |

|                                                                                   |                                                                                                                                                                                                                                                                         |
|-----------------------------------------------------------------------------------|-------------------------------------------------------------------------------------------------------------------------------------------------------------------------------------------------------------------------------------------------------------------------|
|                                                                                   | <input type="checkbox"/> Reported, unverifiable methodology<br><input type="checkbox"/> Unknown, unverifiable methodology                                                                                                                                               |
| Frequency                                                                         | <input type="checkbox"/> > 1 time/year<br><input type="checkbox"/> 1 time/year<br><input type="checkbox"/> < 1 time/year                                                                                                                                                |
| Future                                                                            | <input type="checkbox"/> For ≥ 5 years<br><input type="checkbox"/> between 1 and 5 years<br><input type="checkbox"/> no prospect                                                                                                                                        |
| Quality of performers                                                             | <input checked="" type="checkbox"/> Trained, professionals<br><input type="checkbox"/> Trained, non-professionals – training by documentation, volunteers<br><input type="checkbox"/> Uncertain or not -specified                                                       |
| Quality of data                                                                   | <input checked="" type="checkbox"/> Standard recording of raw data<br><input type="checkbox"/> Free recording of raw data<br><input type="checkbox"/> Anecdotic                                                                                                         |
| Analysis                                                                          | <input type="checkbox"/> Reported, verifiable methodology<br><input type="checkbox"/> Reported, unverifiable methodology<br><input type="checkbox"/> Unknown, unverifiable methodology                                                                                  |
| Quality of analysis                                                               | <input type="checkbox"/> Scientifically based<br><input type="checkbox"/> Indicative only<br><input type="checkbox"/> Unknown                                                                                                                                           |
| <b>REPORTING</b>                                                                  |                                                                                                                                                                                                                                                                         |
| Language                                                                          | Specify reporting language(s): Spanish                                                                                                                                                                                                                                  |
| Availability                                                                      | <input type="checkbox"/> Scientific publication<br><input checked="" type="checkbox"/> Official report available on the internet or in other public forum:<br><input type="checkbox"/> Official report available from network<br><input type="checkbox"/> Not available |
| Frequency                                                                         | <input checked="" type="checkbox"/> ≥ 1 time/year<br><input type="checkbox"/> < 1 time/year                                                                                                                                                                             |
| Historical reference                                                              | <input checked="" type="checkbox"/> over ≥ 5 years:<br><input type="checkbox"/> between 1 and 5 years<br><input type="checkbox"/> no historical analysis                                                                                                                |
| <b>COMMENT(S)</b>                                                                 |                                                                                                                                                                                                                                                                         |
| Information on GMO locations to fulfill the legal requirement for a GMO register. |                                                                                                                                                                                                                                                                         |

## GSEN-09-0098.00.3 ES – Sociedad Española de Ornitología

| EuropaBio's coordinated approach to General Surveillance: Existing Networks |                                                                                                                                                                                                                                                                                                                             |                                                                                                                                                                                                                                                                                                                                                                                                                                                                                                                   |                                                                                                                                                                                                                                                                                                         |
|-----------------------------------------------------------------------------|-----------------------------------------------------------------------------------------------------------------------------------------------------------------------------------------------------------------------------------------------------------------------------------------------------------------------------|-------------------------------------------------------------------------------------------------------------------------------------------------------------------------------------------------------------------------------------------------------------------------------------------------------------------------------------------------------------------------------------------------------------------------------------------------------------------------------------------------------------------|---------------------------------------------------------------------------------------------------------------------------------------------------------------------------------------------------------------------------------------------------------------------------------------------------------|
| ORGANISATION                                                                |                                                                                                                                                                                                                                                                                                                             |                                                                                                                                                                                                                                                                                                                                                                                                                                                                                                                   |                                                                                                                                                                                                                                                                                                         |
| EuropaBio reference                                                         | GS-EN-09-0098                                                                                                                                                                                                                                                                                                               |                                                                                                                                                                                                                                                                                                                                                                                                                                                                                                                   |                                                                                                                                                                                                                                                                                                         |
| Official name of the Network                                                | <b>Sociedad Española de Ornitología</b>                                                                                                                                                                                                                                                                                     |                                                                                                                                                                                                                                                                                                                                                                                                                                                                                                                   |                                                                                                                                                                                                                                                                                                         |
| Other names                                                                 | SEO/BirdLife, Spanish Ornithological Society                                                                                                                                                                                                                                                                                |                                                                                                                                                                                                                                                                                                                                                                                                                                                                                                                   |                                                                                                                                                                                                                                                                                                         |
| Type of organisation                                                        | Nature conservation<br>Founded 1954                                                                                                                                                                                                                                                                                         |                                                                                                                                                                                                                                                                                                                                                                                                                                                                                                                   |                                                                                                                                                                                                                                                                                                         |
| Coordinates                                                                 | C/ Melquiades Biencinto 34<br>28053 Madrid<br><br>Fax: +34 914 340 911                                                                                                                                                                                                                                                      |                                                                                                                                                                                                                                                                                                                                                                                                                                                                                                                   |                                                                                                                                                                                                                                                                                                         |
| Website                                                                     | <a href="http://www.seo.org">http://www.seo.org</a>                                                                                                                                                                                                                                                                         |                                                                                                                                                                                                                                                                                                                                                                                                                                                                                                                   |                                                                                                                                                                                                                                                                                                         |
| Funding                                                                     | 11000 members (4000 volunteers)                                                                                                                                                                                                                                                                                             |                                                                                                                                                                                                                                                                                                                                                                                                                                                                                                                   |                                                                                                                                                                                                                                                                                                         |
| Conflict of interest                                                        | -                                                                                                                                                                                                                                                                                                                           |                                                                                                                                                                                                                                                                                                                                                                                                                                                                                                                   |                                                                                                                                                                                                                                                                                                         |
| Part of other network(s)                                                    | BirdLife International                                                                                                                                                                                                                                                                                                      |                                                                                                                                                                                                                                                                                                                                                                                                                                                                                                                   |                                                                                                                                                                                                                                                                                                         |
| Grouping other network(s)                                                   | 9 regional delegations and 32 local groups                                                                                                                                                                                                                                                                                  |                                                                                                                                                                                                                                                                                                                                                                                                                                                                                                                   |                                                                                                                                                                                                                                                                                                         |
| MONITORING SUBJECT                                                          |                                                                                                                                                                                                                                                                                                                             |                                                                                                                                                                                                                                                                                                                                                                                                                                                                                                                   |                                                                                                                                                                                                                                                                                                         |
| Description                                                                 | Monitoring of fluctuation of bird population due to natural causes or related to human activity.                                                                                                                                                                                                                            |                                                                                                                                                                                                                                                                                                                                                                                                                                                                                                                   |                                                                                                                                                                                                                                                                                                         |
| Protection goal(s) and/or influencing factor(s)                             | <input checked="" type="checkbox"/> Protection goal                                                                                                                                                                                                                                                                         | <input type="checkbox"/> Influencing factor                                                                                                                                                                                                                                                                                                                                                                                                                                                                       |                                                                                                                                                                                                                                                                                                         |
|                                                                             | <input checked="" type="checkbox"/> Biodiversity: Birds<br><input type="checkbox"/> Human Health<br><input type="checkbox"/> Animal Health<br><input type="checkbox"/> Plant Health<br><input type="checkbox"/> Soil function<br><input type="checkbox"/> Water quality<br><input type="checkbox"/> Sustainable Agriculture | <input type="checkbox"/> Agronomic practice<br><input type="checkbox"/> Plant protection<br><input type="checkbox"/> GMO cultivation<br><input type="checkbox"/> Environmental conditions                                                                                                                                                                                                                                                                                                                         |                                                                                                                                                                                                                                                                                                         |
| Duplication of Farmer's questionnaire                                       | <input checked="" type="checkbox"/> No duplication<br><input type="checkbox"/> Partly duplication<br><input type="checkbox"/> Complete duplication                                                                                                                                                                          |                                                                                                                                                                                                                                                                                                                                                                                                                                                                                                                   |                                                                                                                                                                                                                                                                                                         |
| SPECIFICITY                                                                 |                                                                                                                                                                                                                                                                                                                             |                                                                                                                                                                                                                                                                                                                                                                                                                                                                                                                   |                                                                                                                                                                                                                                                                                                         |
| Geography                                                                   | <input type="checkbox"/> EU -wide                                                                                                                                                                                                                                                                                           |                                                                                                                                                                                                                                                                                                                                                                                                                                                                                                                   |                                                                                                                                                                                                                                                                                                         |
|                                                                             | <input type="checkbox"/> Zone A – North                                                                                                                                                                                                                                                                                     | <input type="checkbox"/> Zone B – Centre:                                                                                                                                                                                                                                                                                                                                                                                                                                                                         | <input type="checkbox"/> Zone C – South                                                                                                                                                                                                                                                                 |
|                                                                             | <input type="checkbox"/> Denmark,<br><input type="checkbox"/> Estonia,<br><input type="checkbox"/> Latvia,<br><input type="checkbox"/> Lithuania,<br><input type="checkbox"/> Finland,<br><input type="checkbox"/> Sweden                                                                                                   | <input type="checkbox"/> Belgium,<br><input type="checkbox"/> Czech Republic<br><input type="checkbox"/> Germany,<br><input type="checkbox"/> Ireland,<br><input type="checkbox"/> Luxembourg,<br><input type="checkbox"/> Hungary,<br><input type="checkbox"/> Netherlands,<br><input type="checkbox"/> Austria,<br><input type="checkbox"/> Poland,<br><input type="checkbox"/> Romania,<br><input type="checkbox"/> Slovenia,<br><input type="checkbox"/> Slovakia,<br><input type="checkbox"/> United Kingdom | <input type="checkbox"/> Bulgaria,<br><input type="checkbox"/> Greece,<br><input checked="" type="checkbox"/> Spain,<br><input type="checkbox"/> France,<br><input type="checkbox"/> Italy,<br><input type="checkbox"/> Cyprus,<br><input type="checkbox"/> Malta,<br><input type="checkbox"/> Portugal |
|                                                                             | <input type="checkbox"/> Regional (specify)<br><input type="checkbox"/> Local (specify)                                                                                                                                                                                                                                     |                                                                                                                                                                                                                                                                                                                                                                                                                                                                                                                   |                                                                                                                                                                                                                                                                                                         |
| Factors                                                                     | <input checked="" type="checkbox"/> Multiple species/items (specify): different bird species<br><input type="checkbox"/> Single species/item (specify)                                                                                                                                                                      |                                                                                                                                                                                                                                                                                                                                                                                                                                                                                                                   |                                                                                                                                                                                                                                                                                                         |
| Crop                                                                        | <input checked="" type="checkbox"/> No specific crop(s)<br><input type="checkbox"/> Several crops (e.g. all cereals)<br><input type="checkbox"/> Single crop                                                                                                                                                                |                                                                                                                                                                                                                                                                                                                                                                                                                                                                                                                   |                                                                                                                                                                                                                                                                                                         |
| Trait /treatment                                                            | <input checked="" type="checkbox"/> No specific traits/treatments<br><input type="checkbox"/> Several traits/treatments<br><input type="checkbox"/> Single trait/treatment                                                                                                                                                  |                                                                                                                                                                                                                                                                                                                                                                                                                                                                                                                   |                                                                                                                                                                                                                                                                                                         |
| GMO                                                                         | <input checked="" type="checkbox"/> No GMO bias<br><input type="checkbox"/> GMO specific                                                                                                                                                                                                                                    |                                                                                                                                                                                                                                                                                                                                                                                                                                                                                                                   |                                                                                                                                                                                                                                                                                                         |
| METHODOLOGY                                                                 |                                                                                                                                                                                                                                                                                                                             |                                                                                                                                                                                                                                                                                                                                                                                                                                                                                                                   |                                                                                                                                                                                                                                                                                                         |
| Observations                                                                | <input checked="" type="checkbox"/> Reported, verifiable methodology<br><input type="checkbox"/> Reported, unverifiable methodology                                                                                                                                                                                         |                                                                                                                                                                                                                                                                                                                                                                                                                                                                                                                   |                                                                                                                                                                                                                                                                                                         |



|                                                                                                                                                                             |                                                                                                                                                                                                                                                                        |
|-----------------------------------------------------------------------------------------------------------------------------------------------------------------------------|------------------------------------------------------------------------------------------------------------------------------------------------------------------------------------------------------------------------------------------------------------------------|
|                                                                                                                                                                             | <input type="checkbox"/> Unknown, unverifiable methodology                                                                                                                                                                                                             |
| Frequency                                                                                                                                                                   | <input checked="" type="checkbox"/> > 1 time/year<br><input type="checkbox"/> 1 time/year<br><input type="checkbox"/> < 1 time/year                                                                                                                                    |
| Future                                                                                                                                                                      | <input checked="" type="checkbox"/> For $\geq$ 5 years<br><input type="checkbox"/> between 1 and 5 years<br><input type="checkbox"/> no prospect                                                                                                                       |
| Quality of performers                                                                                                                                                       | <input type="checkbox"/> Trained, professionals<br><input checked="" type="checkbox"/> Trained, non-professionals – training by documentation, volunteers<br><input type="checkbox"/> Uncertain or not -specified                                                      |
| Quality of data                                                                                                                                                             | <input checked="" type="checkbox"/> Standard recording of raw data<br><input type="checkbox"/> Free recording of raw data<br><input type="checkbox"/> Anecdotic                                                                                                        |
| Analysis                                                                                                                                                                    | <input checked="" type="checkbox"/> Reported, verifiable methodology<br><input type="checkbox"/> Reported, unverifiable methodology<br><input type="checkbox"/> Unknown, unverifiable methodology                                                                      |
| Quality of analysis                                                                                                                                                         | <input checked="" type="checkbox"/> Scientifically based<br><input type="checkbox"/> Indicative only<br><input type="checkbox"/> Unknown                                                                                                                               |
| <b>REPORTING</b>                                                                                                                                                            |                                                                                                                                                                                                                                                                        |
| Language                                                                                                                                                                    | Specify reporting language(s): Spanish                                                                                                                                                                                                                                 |
| Availability                                                                                                                                                                | <input type="checkbox"/> Scientific publication<br><input checked="" type="checkbox"/> Official report available on the internet or in other public forum<br><input type="checkbox"/> Official report available from network<br><input type="checkbox"/> Not available |
| Frequency                                                                                                                                                                   | <input type="checkbox"/> $\geq$ 1 time/year – Yearly reports only available for 2004, 2005 and 2006<br><input type="checkbox"/> < 1 time/year – Detailed reports per species according to multi-year plan                                                              |
| Historical reference                                                                                                                                                        | <input checked="" type="checkbox"/> over $\geq$ 5 years<br><input type="checkbox"/> between 1 and 5 years<br><input type="checkbox"/> no historical analysis                                                                                                           |
| <b>COMMENT(S)</b>                                                                                                                                                           |                                                                                                                                                                                                                                                                        |
| Network using bird species as representative indicators and as protection goals. In recent years annual reporting is replaced by species monographs covering several years. |                                                                                                                                                                                                                                                                        |

**GSEN-09-0100.00.2 ES – SEEA**

| <b>EuropaBio's coordinated approach to General Surveillance: Existing Networks</b> |                                                                                                                                                                                                                                                                                                                               |                                                                                                                                                                                                                                                                                                                                                                                                                                                                                                                   |                                                                                                                                                                                                                                                                                                         |
|------------------------------------------------------------------------------------|-------------------------------------------------------------------------------------------------------------------------------------------------------------------------------------------------------------------------------------------------------------------------------------------------------------------------------|-------------------------------------------------------------------------------------------------------------------------------------------------------------------------------------------------------------------------------------------------------------------------------------------------------------------------------------------------------------------------------------------------------------------------------------------------------------------------------------------------------------------|---------------------------------------------------------------------------------------------------------------------------------------------------------------------------------------------------------------------------------------------------------------------------------------------------------|
| <b>ORGANISATION</b>                                                                |                                                                                                                                                                                                                                                                                                                               |                                                                                                                                                                                                                                                                                                                                                                                                                                                                                                                   |                                                                                                                                                                                                                                                                                                         |
| EuropaBio reference                                                                | GS-EN-09-0100                                                                                                                                                                                                                                                                                                                 |                                                                                                                                                                                                                                                                                                                                                                                                                                                                                                                   |                                                                                                                                                                                                                                                                                                         |
| Official name of the Network                                                       | <b>Sociedad Española de Entomología Aplicada</b>                                                                                                                                                                                                                                                                              |                                                                                                                                                                                                                                                                                                                                                                                                                                                                                                                   |                                                                                                                                                                                                                                                                                                         |
| Other names                                                                        | SEEA<br>Spanish Society of Applied Entomology                                                                                                                                                                                                                                                                                 |                                                                                                                                                                                                                                                                                                                                                                                                                                                                                                                   |                                                                                                                                                                                                                                                                                                         |
| Type of organisation                                                               | Nature conservation<br>Founded 1985                                                                                                                                                                                                                                                                                           |                                                                                                                                                                                                                                                                                                                                                                                                                                                                                                                   |                                                                                                                                                                                                                                                                                                         |
| Coordinates                                                                        | Sociedad Española de Entomología Aplicada<br>Unidad de Protección de Cultivos<br>E. T. S. I. Agrónomos<br>28040 Madrid                                                                                                                                                                                                        |                                                                                                                                                                                                                                                                                                                                                                                                                                                                                                                   |                                                                                                                                                                                                                                                                                                         |
| Website                                                                            | <a href="http://www.seea.es/">http://www.seea.es/</a>                                                                                                                                                                                                                                                                         |                                                                                                                                                                                                                                                                                                                                                                                                                                                                                                                   |                                                                                                                                                                                                                                                                                                         |
| Funding                                                                            | 150 members                                                                                                                                                                                                                                                                                                                   |                                                                                                                                                                                                                                                                                                                                                                                                                                                                                                                   |                                                                                                                                                                                                                                                                                                         |
| Conflict of interest                                                               | -                                                                                                                                                                                                                                                                                                                             |                                                                                                                                                                                                                                                                                                                                                                                                                                                                                                                   |                                                                                                                                                                                                                                                                                                         |
| Part of other network(s)                                                           |                                                                                                                                                                                                                                                                                                                               |                                                                                                                                                                                                                                                                                                                                                                                                                                                                                                                   |                                                                                                                                                                                                                                                                                                         |
| Grouping other network(s)                                                          |                                                                                                                                                                                                                                                                                                                               |                                                                                                                                                                                                                                                                                                                                                                                                                                                                                                                   |                                                                                                                                                                                                                                                                                                         |
| <b>MONITORING SUBJECT</b>                                                          |                                                                                                                                                                                                                                                                                                                               |                                                                                                                                                                                                                                                                                                                                                                                                                                                                                                                   |                                                                                                                                                                                                                                                                                                         |
| Description                                                                        | Encourage, facilitate, combine and disseminate the research and development in all branches of Applied Entomology                                                                                                                                                                                                             |                                                                                                                                                                                                                                                                                                                                                                                                                                                                                                                   |                                                                                                                                                                                                                                                                                                         |
| Protection goal(s) and/or influencing factor(s)                                    | <input checked="" type="checkbox"/> Protection goal                                                                                                                                                                                                                                                                           | <input type="checkbox"/> Influencing factor                                                                                                                                                                                                                                                                                                                                                                                                                                                                       |                                                                                                                                                                                                                                                                                                         |
|                                                                                    | <input checked="" type="checkbox"/> Biodiversity: Insects<br><input type="checkbox"/> Human Health<br><input type="checkbox"/> Animal Health<br><input type="checkbox"/> Plant Health<br><input type="checkbox"/> Soil function<br><input type="checkbox"/> Water quality<br><input type="checkbox"/> Sustainable Agriculture | <input type="checkbox"/> Agronomic practice<br><input type="checkbox"/> Plant protection<br><input type="checkbox"/> GMO cultivation<br><input type="checkbox"/> Environmental conditions                                                                                                                                                                                                                                                                                                                         |                                                                                                                                                                                                                                                                                                         |
| Duplication of Farmer's questionnaire                                              | <input checked="" type="checkbox"/> No duplication<br><input type="checkbox"/> Partly duplication<br><input type="checkbox"/> Complete duplication                                                                                                                                                                            |                                                                                                                                                                                                                                                                                                                                                                                                                                                                                                                   |                                                                                                                                                                                                                                                                                                         |
| <b>SPECIFICITY</b>                                                                 |                                                                                                                                                                                                                                                                                                                               |                                                                                                                                                                                                                                                                                                                                                                                                                                                                                                                   |                                                                                                                                                                                                                                                                                                         |
| Geography                                                                          | <input type="checkbox"/> EU -wide                                                                                                                                                                                                                                                                                             |                                                                                                                                                                                                                                                                                                                                                                                                                                                                                                                   |                                                                                                                                                                                                                                                                                                         |
|                                                                                    | <input type="checkbox"/> Zone A – North                                                                                                                                                                                                                                                                                       | <input type="checkbox"/> Zone B – Centre:                                                                                                                                                                                                                                                                                                                                                                                                                                                                         | <input type="checkbox"/> Zone C – South                                                                                                                                                                                                                                                                 |
|                                                                                    | <input type="checkbox"/> Denmark,<br><input type="checkbox"/> Estonia,<br><input type="checkbox"/> Latvia,<br><input type="checkbox"/> Lithuania,<br><input type="checkbox"/> Finland,<br><input type="checkbox"/> Sweden                                                                                                     | <input type="checkbox"/> Belgium,<br><input type="checkbox"/> Czech Republic<br><input type="checkbox"/> Germany,<br><input type="checkbox"/> Ireland,<br><input type="checkbox"/> Luxembourg,<br><input type="checkbox"/> Hungary,<br><input type="checkbox"/> Netherlands,<br><input type="checkbox"/> Austria,<br><input type="checkbox"/> Poland,<br><input type="checkbox"/> Romania,<br><input type="checkbox"/> Slovenia,<br><input type="checkbox"/> Slovakia,<br><input type="checkbox"/> United Kingdom | <input type="checkbox"/> Bulgaria,<br><input type="checkbox"/> Greece,<br><input checked="" type="checkbox"/> Spain,<br><input type="checkbox"/> France,<br><input type="checkbox"/> Italy,<br><input type="checkbox"/> Cyprus,<br><input type="checkbox"/> Malta,<br><input type="checkbox"/> Portugal |
|                                                                                    | <input type="checkbox"/> Regional (specify)<br><input type="checkbox"/> Local (specify)                                                                                                                                                                                                                                       |                                                                                                                                                                                                                                                                                                                                                                                                                                                                                                                   |                                                                                                                                                                                                                                                                                                         |
| Factors                                                                            | <input checked="" type="checkbox"/> Multiple species/items (specify): different insect species<br><input type="checkbox"/> Single species/item (specify)                                                                                                                                                                      |                                                                                                                                                                                                                                                                                                                                                                                                                                                                                                                   |                                                                                                                                                                                                                                                                                                         |
| Crop                                                                               | <input checked="" type="checkbox"/> No specific crop(s)<br><input type="checkbox"/> Several crops (e.g. all cereals)<br><input type="checkbox"/> Single crop                                                                                                                                                                  |                                                                                                                                                                                                                                                                                                                                                                                                                                                                                                                   |                                                                                                                                                                                                                                                                                                         |
| Trait /treatment                                                                   | <input checked="" type="checkbox"/> No specific traits/treatments<br><input type="checkbox"/> Several traits/treatments<br><input type="checkbox"/> Single trait/treatment                                                                                                                                                    |                                                                                                                                                                                                                                                                                                                                                                                                                                                                                                                   |                                                                                                                                                                                                                                                                                                         |
| GMO                                                                                | <input checked="" type="checkbox"/> No GMO bias<br><input type="checkbox"/> GMO specific                                                                                                                                                                                                                                      |                                                                                                                                                                                                                                                                                                                                                                                                                                                                                                                   |                                                                                                                                                                                                                                                                                                         |
| <b>METHODOLOGY</b>                                                                 |                                                                                                                                                                                                                                                                                                                               |                                                                                                                                                                                                                                                                                                                                                                                                                                                                                                                   |                                                                                                                                                                                                                                                                                                         |

|                                                        |                                                                                                                                                                                                                                                                        |
|--------------------------------------------------------|------------------------------------------------------------------------------------------------------------------------------------------------------------------------------------------------------------------------------------------------------------------------|
| Observations                                           | <input type="checkbox"/> Reported, verifiable methodology<br><input type="checkbox"/> Reported, unverifiable methodology<br><input type="checkbox"/> Unknown, unverifiable methodology                                                                                 |
| Frequency                                              | <input type="checkbox"/> > 1 time/year<br><input type="checkbox"/> 1 time/year<br><input type="checkbox"/> < 1 time/year                                                                                                                                               |
| Future                                                 | <input type="checkbox"/> For $\geq 5$ years<br><input type="checkbox"/> between 1 and 5 years<br><input type="checkbox"/> no prospect                                                                                                                                  |
| Quality of performers                                  | <input type="checkbox"/> Trained, professionals<br><input checked="" type="checkbox"/> Trained, non-professionals – training by documentation, volunteers<br><input type="checkbox"/> Uncertain or not -specified                                                      |
| Quality of data                                        | <input type="checkbox"/> Standard recording of raw data<br><input type="checkbox"/> Free recording of raw data<br><input type="checkbox"/> Anecdotic                                                                                                                   |
| Analysis                                               | <input type="checkbox"/> Reported, verifiable methodology<br><input type="checkbox"/> Reported, unverifiable methodology<br><input type="checkbox"/> Unknown, unverifiable methodology                                                                                 |
| Quality of analysis                                    | <input type="checkbox"/> Scientifically based<br><input type="checkbox"/> Indicative only<br><input type="checkbox"/> Unknown                                                                                                                                          |
| <b>REPORTING</b>                                       |                                                                                                                                                                                                                                                                        |
| Language                                               | Specify reporting language(s): Spanish                                                                                                                                                                                                                                 |
| Availability                                           | <input type="checkbox"/> Scientific publication<br><input checked="" type="checkbox"/> Official report available on the internet or in other public forum<br><input type="checkbox"/> Official report available from network<br><input type="checkbox"/> Not available |
| Frequency                                              | <input type="checkbox"/> $\geq 1$ time/year<br><input type="checkbox"/> < 1 time/year – Symposium abstract but not publicly available                                                                                                                                  |
| Historical reference                                   | <input type="checkbox"/> over $\geq 5$ years<br><input type="checkbox"/> between 1 and 5 years<br><input type="checkbox"/> no historical analysis                                                                                                                      |
| <b>COMMENT(S)</b>                                      |                                                                                                                                                                                                                                                                        |
| Scientific reports are not available in public domain. |                                                                                                                                                                                                                                                                        |

## Sweden

## GSEN-09-0225.00.1 SE – BioSoM

| EuropaBio's coordinated approach to General Surveillance: Existing Networks |                                                                                                                                                                                                                                                                                                                                                                                                   |                                                                                                                                                                                                                                                                                                                                                                                                                                                                                                                   |                                                                                                                                                                                                                                                                                              |
|-----------------------------------------------------------------------------|---------------------------------------------------------------------------------------------------------------------------------------------------------------------------------------------------------------------------------------------------------------------------------------------------------------------------------------------------------------------------------------------------|-------------------------------------------------------------------------------------------------------------------------------------------------------------------------------------------------------------------------------------------------------------------------------------------------------------------------------------------------------------------------------------------------------------------------------------------------------------------------------------------------------------------|----------------------------------------------------------------------------------------------------------------------------------------------------------------------------------------------------------------------------------------------------------------------------------------------|
| <b>ORGANISATION</b>                                                         |                                                                                                                                                                                                                                                                                                                                                                                                   |                                                                                                                                                                                                                                                                                                                                                                                                                                                                                                                   |                                                                                                                                                                                                                                                                                              |
| EuropaBio reference                                                         | GS-EN-09-0225                                                                                                                                                                                                                                                                                                                                                                                     |                                                                                                                                                                                                                                                                                                                                                                                                                                                                                                                   |                                                                                                                                                                                                                                                                                              |
| Official name of the Network                                                | <b>BioSoM - Biological Soil Mapping</b><br><b>Biologisk markkartering</b>                                                                                                                                                                                                                                                                                                                         |                                                                                                                                                                                                                                                                                                                                                                                                                                                                                                                   |                                                                                                                                                                                                                                                                                              |
| Other names                                                                 |                                                                                                                                                                                                                                                                                                                                                                                                   |                                                                                                                                                                                                                                                                                                                                                                                                                                                                                                                   |                                                                                                                                                                                                                                                                                              |
| Type of organisation                                                        | Academic<br>Founded 2009                                                                                                                                                                                                                                                                                                                                                                          |                                                                                                                                                                                                                                                                                                                                                                                                                                                                                                                   |                                                                                                                                                                                                                                                                                              |
| Coordinates                                                                 | Swedish University of Agricultural Sciences (SLU),<br>Department of Soil and Environment<br>Inst f mark och milj , precisionsodling<br>Box 234<br>Gr br dragatan 19<br>53223 SKARA                                                                                                                                                                                                                |                                                                                                                                                                                                                                                                                                                                                                                                                                                                                                                   |                                                                                                                                                                                                                                                                                              |
| Website                                                                     | <a href="http://www.slu.se/mark/biosom">http://www.slu.se/mark/biosom</a>                                                                                                                                                                                                                                                                                                                         |                                                                                                                                                                                                                                                                                                                                                                                                                                                                                                                   |                                                                                                                                                                                                                                                                                              |
| Funding                                                                     | the Faculty of Natural Resources and Agricultural Sciences, SLU (50% of the funding), the Swedish Farmers Research Foundation (SLF) and the SSO, VL and SL research foundations, the companies Eurofins Food Agro AB, HS Konsult AB, Findus R&D, SW and Scanbi Diagnostics AB.                                                                                                                    |                                                                                                                                                                                                                                                                                                                                                                                                                                                                                                                   |                                                                                                                                                                                                                                                                                              |
| Conflict of interest                                                        | -                                                                                                                                                                                                                                                                                                                                                                                                 |                                                                                                                                                                                                                                                                                                                                                                                                                                                                                                                   |                                                                                                                                                                                                                                                                                              |
| Part of other network(s)                                                    | Swedish University of Agricultural Sciences. Research project (2009-2012) with researchers from agronomy, plant breeding, plant pathology, molecular microbiology/biology and bio/chemistry                                                                                                                                                                                                       |                                                                                                                                                                                                                                                                                                                                                                                                                                                                                                                   |                                                                                                                                                                                                                                                                                              |
| Grouping other network(s)                                                   |                                                                                                                                                                                                                                                                                                                                                                                                   |                                                                                                                                                                                                                                                                                                                                                                                                                                                                                                                   |                                                                                                                                                                                                                                                                                              |
| <b>MONITORING SUBJECT</b>                                                   |                                                                                                                                                                                                                                                                                                                                                                                                   |                                                                                                                                                                                                                                                                                                                                                                                                                                                                                                                   |                                                                                                                                                                                                                                                                                              |
| Description                                                                 | Thematic research program, aiming to give scientific support towards a new service to farmers detecting soil-borne pathogens and advising in crop management to optimize production in Sweden.                                                                                                                                                                                                    |                                                                                                                                                                                                                                                                                                                                                                                                                                                                                                                   |                                                                                                                                                                                                                                                                                              |
| Protection goal(s) and/or influencing factor(s)                             | <input checked="" type="checkbox"/> Protection goal<br><input type="checkbox"/> Biodiversity<br><input type="checkbox"/> Human Health<br><input type="checkbox"/> Animal Health<br><input checked="" type="checkbox"/> Plant Health<br><input checked="" type="checkbox"/> Soil function<br><input type="checkbox"/> Water quality<br><input checked="" type="checkbox"/> Sustainable Agriculture | <input type="checkbox"/> Influencing factor<br><input type="checkbox"/> Agronomic practice<br><input checked="" type="checkbox"/> Plant protection<br><input type="checkbox"/> GMO cultivation<br><input type="checkbox"/> Environmental conditions                                                                                                                                                                                                                                                               |                                                                                                                                                                                                                                                                                              |
| Duplication of Farmer's questionnaire                                       | <input checked="" type="checkbox"/> No duplication<br><input type="checkbox"/> Partly duplication<br><input type="checkbox"/> Complete duplication                                                                                                                                                                                                                                                |                                                                                                                                                                                                                                                                                                                                                                                                                                                                                                                   |                                                                                                                                                                                                                                                                                              |
| <b>SPECIFICITY</b>                                                          |                                                                                                                                                                                                                                                                                                                                                                                                   |                                                                                                                                                                                                                                                                                                                                                                                                                                                                                                                   |                                                                                                                                                                                                                                                                                              |
| Geography                                                                   | <input type="checkbox"/> EU -wide<br><input checked="" type="checkbox"/> Zone A – North<br><input type="checkbox"/> Zone B – Centre:<br><input type="checkbox"/> Zone C – South                                                                                                                                                                                                                   |                                                                                                                                                                                                                                                                                                                                                                                                                                                                                                                   |                                                                                                                                                                                                                                                                                              |
|                                                                             | <input type="checkbox"/> Denmark,<br><input type="checkbox"/> Estonia,<br><input type="checkbox"/> Latvia,<br><input type="checkbox"/> Lithuania,<br><input type="checkbox"/> Finland,<br><input checked="" type="checkbox"/> Sweden                                                                                                                                                              | <input type="checkbox"/> Belgium,<br><input type="checkbox"/> Czech Republic<br><input type="checkbox"/> Germany,<br><input type="checkbox"/> Ireland,<br><input type="checkbox"/> Luxembourg,<br><input type="checkbox"/> Hungary,<br><input type="checkbox"/> Netherlands,<br><input type="checkbox"/> Austria,<br><input type="checkbox"/> Poland,<br><input type="checkbox"/> Romania,<br><input type="checkbox"/> Slovenia,<br><input type="checkbox"/> Slovakia,<br><input type="checkbox"/> United Kingdom | <input type="checkbox"/> Bulgaria,<br><input type="checkbox"/> Greece,<br><input type="checkbox"/> Spain,<br><input type="checkbox"/> France,<br><input type="checkbox"/> Italy,<br><input type="checkbox"/> Cyprus,<br><input type="checkbox"/> Malta,<br><input type="checkbox"/> Portugal |
|                                                                             | <input type="checkbox"/> Regional (specify)<br><input type="checkbox"/> Local (specify)                                                                                                                                                                                                                                                                                                           |                                                                                                                                                                                                                                                                                                                                                                                                                                                                                                                   |                                                                                                                                                                                                                                                                                              |
| Factors                                                                     | <input checked="" type="checkbox"/> Multiple species/items (specify): soil-borne plant pathogens<br><input type="checkbox"/> Single species/item (specify):                                                                                                                                                                                                                                       |                                                                                                                                                                                                                                                                                                                                                                                                                                                                                                                   |                                                                                                                                                                                                                                                                                              |
| Crop                                                                        | <input checked="" type="checkbox"/> No specific crop(s)<br><input type="checkbox"/> Several crops (e.g. all cereals)<br><input type="checkbox"/> Single crop                                                                                                                                                                                                                                      |                                                                                                                                                                                                                                                                                                                                                                                                                                                                                                                   |                                                                                                                                                                                                                                                                                              |
| Trait /treatment                                                            | <input checked="" type="checkbox"/> No specific traits/treatments                                                                                                                                                                                                                                                                                                                                 |                                                                                                                                                                                                                                                                                                                                                                                                                                                                                                                   |                                                                                                                                                                                                                                                                                              |

|                                                                                                                                           |                                                                                                                                                                                                                                                                        |
|-------------------------------------------------------------------------------------------------------------------------------------------|------------------------------------------------------------------------------------------------------------------------------------------------------------------------------------------------------------------------------------------------------------------------|
|                                                                                                                                           | <input type="checkbox"/> Several traits/treatments<br><input type="checkbox"/> Single trait/treatment                                                                                                                                                                  |
| GMO                                                                                                                                       | <input checked="" type="checkbox"/> No GMO bias<br><input type="checkbox"/> GMO specific                                                                                                                                                                               |
| <b>METHODOLOGY</b>                                                                                                                        |                                                                                                                                                                                                                                                                        |
| Observations                                                                                                                              | <input checked="" type="checkbox"/> Reported, verifiable methodology<br><input type="checkbox"/> Reported, unverifiable methodology<br><input type="checkbox"/> Unknown, unverifiable methodology                                                                      |
| Frequency                                                                                                                                 | <input checked="" type="checkbox"/> > 1 time/year<br><input type="checkbox"/> 1 time/year<br><input type="checkbox"/> < 1 time/year                                                                                                                                    |
| Future                                                                                                                                    | <input type="checkbox"/> For $\geq$ 5 years<br><input checked="" type="checkbox"/> between 1 and 5 years<br><input type="checkbox"/> no prospect                                                                                                                       |
| Quality of performers                                                                                                                     | <input checked="" type="checkbox"/> Trained, professionals<br><input type="checkbox"/> Trained, non-professionals – training by documentation, volunteers<br><input type="checkbox"/> Uncertain or not -specified                                                      |
| Quality of data                                                                                                                           | <input type="checkbox"/> Standard recording of raw data<br><input type="checkbox"/> Free recording of raw data<br><input type="checkbox"/> Anecdotic                                                                                                                   |
| Analysis                                                                                                                                  | <input checked="" type="checkbox"/> Reported, verifiable methodology<br><input type="checkbox"/> Reported, unverifiable methodology<br><input type="checkbox"/> Unknown, unverifiable methodology                                                                      |
| Quality of analysis                                                                                                                       | <input checked="" type="checkbox"/> Scientifically based<br><input type="checkbox"/> Indicative only<br><input type="checkbox"/> Unknown                                                                                                                               |
| <b>REPORTING</b>                                                                                                                          |                                                                                                                                                                                                                                                                        |
| Language                                                                                                                                  | Reporting language(s): Swedish/English                                                                                                                                                                                                                                 |
| Availability                                                                                                                              | <input checked="" type="checkbox"/> Scientific publication<br><input type="checkbox"/> Official report available on the internet or in other public forum<br><input type="checkbox"/> Official report available from network<br><input type="checkbox"/> Not available |
| Frequency                                                                                                                                 | <input checked="" type="checkbox"/> $\geq$ 1 time/year<br><input type="checkbox"/> < 1 time/year                                                                                                                                                                       |
| Historical reference                                                                                                                      | <input type="checkbox"/> over $\geq$ 5 years<br><input checked="" type="checkbox"/> between 1 and 5 years<br><input type="checkbox"/> no historical analysis                                                                                                           |
| <b>COMMENT(S)</b>                                                                                                                         |                                                                                                                                                                                                                                                                        |
| The project is specific for arable land. This project is to develop the monitoring and forecasting system (to be developed commercially). |                                                                                                                                                                                                                                                                        |

**GSEN-09-0226.00.1 SE – SOF**

| <b>EuropaBio's coordinated approach to General Surveillance: Existing Networks</b> |                                                                                                                                                                                                                                                                                                                              |                                                                                                                                                                                                                                                                                                                                                                                                                                                                                                                   |                                                                                                                                                                                                                                                                                              |
|------------------------------------------------------------------------------------|------------------------------------------------------------------------------------------------------------------------------------------------------------------------------------------------------------------------------------------------------------------------------------------------------------------------------|-------------------------------------------------------------------------------------------------------------------------------------------------------------------------------------------------------------------------------------------------------------------------------------------------------------------------------------------------------------------------------------------------------------------------------------------------------------------------------------------------------------------|----------------------------------------------------------------------------------------------------------------------------------------------------------------------------------------------------------------------------------------------------------------------------------------------|
| <b>ORGANISATION</b>                                                                |                                                                                                                                                                                                                                                                                                                              |                                                                                                                                                                                                                                                                                                                                                                                                                                                                                                                   |                                                                                                                                                                                                                                                                                              |
| EuropaBio reference                                                                | GS-EN-09-0226                                                                                                                                                                                                                                                                                                                |                                                                                                                                                                                                                                                                                                                                                                                                                                                                                                                   |                                                                                                                                                                                                                                                                                              |
| Official name of the Network                                                       | <b>SOF - Swedish Ornithological Society</b><br><b>Sveriges Ornitologiska Förening</b>                                                                                                                                                                                                                                        |                                                                                                                                                                                                                                                                                                                                                                                                                                                                                                                   |                                                                                                                                                                                                                                                                                              |
| Other names                                                                        |                                                                                                                                                                                                                                                                                                                              |                                                                                                                                                                                                                                                                                                                                                                                                                                                                                                                   |                                                                                                                                                                                                                                                                                              |
| Type of organisation                                                               | Nature conservation<br>Founded 1945                                                                                                                                                                                                                                                                                          |                                                                                                                                                                                                                                                                                                                                                                                                                                                                                                                   |                                                                                                                                                                                                                                                                                              |
| Coordinates                                                                        | Stenhusa Gård,<br>SE-380 62 Mörbylånga,<br>Sweden<br><br>Email: info[at]sofnet.org                                                                                                                                                                                                                                           |                                                                                                                                                                                                                                                                                                                                                                                                                                                                                                                   |                                                                                                                                                                                                                                                                                              |
| Website                                                                            | <a href="http://www.sofnet.org">http://www.sofnet.org</a>                                                                                                                                                                                                                                                                    |                                                                                                                                                                                                                                                                                                                                                                                                                                                                                                                   |                                                                                                                                                                                                                                                                                              |
| Funding                                                                            | 11000 members.                                                                                                                                                                                                                                                                                                               |                                                                                                                                                                                                                                                                                                                                                                                                                                                                                                                   |                                                                                                                                                                                                                                                                                              |
| Conflict of interest                                                               | -                                                                                                                                                                                                                                                                                                                            |                                                                                                                                                                                                                                                                                                                                                                                                                                                                                                                   |                                                                                                                                                                                                                                                                                              |
| Part of other network(s)                                                           | Birdlife International                                                                                                                                                                                                                                                                                                       |                                                                                                                                                                                                                                                                                                                                                                                                                                                                                                                   |                                                                                                                                                                                                                                                                                              |
| Grouping other network(s)                                                          |                                                                                                                                                                                                                                                                                                                              |                                                                                                                                                                                                                                                                                                                                                                                                                                                                                                                   |                                                                                                                                                                                                                                                                                              |
| <b>MONITORING SUBJECT</b>                                                          |                                                                                                                                                                                                                                                                                                                              |                                                                                                                                                                                                                                                                                                                                                                                                                                                                                                                   |                                                                                                                                                                                                                                                                                              |
| Description                                                                        | Thematic research program, aiming to give scientific support towards a new service to farmers detecting soil-borne pathogens and advising in crop management to optimize production in Sweden.                                                                                                                               |                                                                                                                                                                                                                                                                                                                                                                                                                                                                                                                   |                                                                                                                                                                                                                                                                                              |
| Protection goal(s) and/or influencing factor(s)                                    | <input checked="" type="checkbox"/> Protection goal                                                                                                                                                                                                                                                                          | <input type="checkbox"/> Influencing factor                                                                                                                                                                                                                                                                                                                                                                                                                                                                       |                                                                                                                                                                                                                                                                                              |
|                                                                                    | <input checked="" type="checkbox"/> Biodiversity / Birds<br><input type="checkbox"/> Human Health<br><input type="checkbox"/> Animal Health<br><input type="checkbox"/> Plant Health<br><input type="checkbox"/> Soil function<br><input type="checkbox"/> Water quality<br><input type="checkbox"/> Sustainable Agriculture | <input type="checkbox"/> Agronomic practice<br><input type="checkbox"/> Plant protection<br><input type="checkbox"/> GMO cultivation<br><input type="checkbox"/> Environmental conditions                                                                                                                                                                                                                                                                                                                         |                                                                                                                                                                                                                                                                                              |
| Duplication of Farmer's questionnaire                                              | <input checked="" type="checkbox"/> No duplication<br><input type="checkbox"/> Partly duplication<br><input type="checkbox"/> Complete duplication                                                                                                                                                                           |                                                                                                                                                                                                                                                                                                                                                                                                                                                                                                                   |                                                                                                                                                                                                                                                                                              |
| <b>SPECIFICITY</b>                                                                 |                                                                                                                                                                                                                                                                                                                              |                                                                                                                                                                                                                                                                                                                                                                                                                                                                                                                   |                                                                                                                                                                                                                                                                                              |
| Geography                                                                          | <input type="checkbox"/> EU -wide                                                                                                                                                                                                                                                                                            |                                                                                                                                                                                                                                                                                                                                                                                                                                                                                                                   |                                                                                                                                                                                                                                                                                              |
|                                                                                    | <input checked="" type="checkbox"/> Zone A – North                                                                                                                                                                                                                                                                           | <input type="checkbox"/> Zone B – Centre:                                                                                                                                                                                                                                                                                                                                                                                                                                                                         | <input type="checkbox"/> Zone C – South                                                                                                                                                                                                                                                      |
|                                                                                    | <input type="checkbox"/> Denmark,<br><input type="checkbox"/> Estonia,<br><input type="checkbox"/> Latvia,<br><input type="checkbox"/> Lithuania,<br><input type="checkbox"/> Finland,<br><input checked="" type="checkbox"/> Sweden                                                                                         | <input type="checkbox"/> Belgium,<br><input type="checkbox"/> Czech Republic<br><input type="checkbox"/> Germany,<br><input type="checkbox"/> Ireland,<br><input type="checkbox"/> Luxembourg,<br><input type="checkbox"/> Hungary,<br><input type="checkbox"/> Netherlands,<br><input type="checkbox"/> Austria,<br><input type="checkbox"/> Poland,<br><input type="checkbox"/> Romania,<br><input type="checkbox"/> Slovenia,<br><input type="checkbox"/> Slovakia,<br><input type="checkbox"/> United Kingdom | <input type="checkbox"/> Bulgaria,<br><input type="checkbox"/> Greece,<br><input type="checkbox"/> Spain,<br><input type="checkbox"/> France,<br><input type="checkbox"/> Italy,<br><input type="checkbox"/> Cyprus,<br><input type="checkbox"/> Malta,<br><input type="checkbox"/> Portugal |
|                                                                                    | <input type="checkbox"/> Regional (specify)<br><input type="checkbox"/> Local (specify)                                                                                                                                                                                                                                      |                                                                                                                                                                                                                                                                                                                                                                                                                                                                                                                   |                                                                                                                                                                                                                                                                                              |
| Factors                                                                            | <input checked="" type="checkbox"/> Multiple species/items (specify): different bird species<br><input type="checkbox"/> Single species/item (specify):                                                                                                                                                                      |                                                                                                                                                                                                                                                                                                                                                                                                                                                                                                                   |                                                                                                                                                                                                                                                                                              |
| Crop                                                                               | <input checked="" type="checkbox"/> No specific crop(s)<br><input type="checkbox"/> Several crops (e.g. all cereals)<br><input type="checkbox"/> Single crop                                                                                                                                                                 |                                                                                                                                                                                                                                                                                                                                                                                                                                                                                                                   |                                                                                                                                                                                                                                                                                              |
| Trait /treatment                                                                   | <input checked="" type="checkbox"/> No specific traits/treatments<br><input type="checkbox"/> Several traits/treatments<br><input type="checkbox"/> Single trait/treatment                                                                                                                                                   |                                                                                                                                                                                                                                                                                                                                                                                                                                                                                                                   |                                                                                                                                                                                                                                                                                              |
| GMO                                                                                | <input checked="" type="checkbox"/> No GMO bias<br><input type="checkbox"/> GMO specific                                                                                                                                                                                                                                     |                                                                                                                                                                                                                                                                                                                                                                                                                                                                                                                   |                                                                                                                                                                                                                                                                                              |

| <b>METHODOLOGY</b>                                                                      |                                                                                                                                                                                                                                                                                   |
|-----------------------------------------------------------------------------------------|-----------------------------------------------------------------------------------------------------------------------------------------------------------------------------------------------------------------------------------------------------------------------------------|
| Observations                                                                            | <input checked="" type="checkbox"/> Reported, verifiable methodology<br><input type="checkbox"/> Reported, unverifiable methodology<br><input type="checkbox"/> Unknown, unverifiable methodology                                                                                 |
| Frequency                                                                               | <input checked="" type="checkbox"/> > 1 time/year<br><input type="checkbox"/> 1 time/year<br><input type="checkbox"/> < 1 time/year                                                                                                                                               |
| Future                                                                                  | <input type="checkbox"/> For ≥ 5 years<br><input checked="" type="checkbox"/> between 1 and 5 years<br><input type="checkbox"/> no prospect                                                                                                                                       |
| Quality of performers                                                                   | <input type="checkbox"/> Trained, professionals<br><input checked="" type="checkbox"/> Trained, non-professionals – training by documentation, volunteers<br><input type="checkbox"/> Uncertain or not -specified                                                                 |
| Quality of data                                                                         | <input type="checkbox"/> Standard recording of raw data<br><input type="checkbox"/> Free recording of raw data<br><input type="checkbox"/> Anecdotic                                                                                                                              |
| Analysis                                                                                | <input checked="" type="checkbox"/> Reported, verifiable methodology<br><input type="checkbox"/> Reported, unverifiable methodology<br><input type="checkbox"/> Unknown, unverifiable methodology                                                                                 |
| Quality of analysis                                                                     | <input checked="" type="checkbox"/> Scientifically based<br><input type="checkbox"/> Indicative only<br><input type="checkbox"/> Unknown                                                                                                                                          |
| <b>REPORTING</b>                                                                        |                                                                                                                                                                                                                                                                                   |
| Language                                                                                | Reporting language(s): Swedish/English                                                                                                                                                                                                                                            |
| Availability                                                                            | <input checked="" type="checkbox"/> Scientific publication<br><input checked="" type="checkbox"/> Official report available on the internet or in other public forum<br><input type="checkbox"/> Official report available from network<br><input type="checkbox"/> Not available |
| Frequency                                                                               | <input checked="" type="checkbox"/> ≥ 1 time/year<br><input type="checkbox"/> < 1 time/year                                                                                                                                                                                       |
| Historical reference                                                                    | <input checked="" type="checkbox"/> over ≥ 5 years<br><input type="checkbox"/> between 1 and 5 years<br><input type="checkbox"/> no historical analysis                                                                                                                           |
| <b>COMMENT(S)</b>                                                                       |                                                                                                                                                                                                                                                                                   |
| <b>Network using bird species as representative indicators and as protection goals.</b> |                                                                                                                                                                                                                                                                                   |



**GSEN-09-0227.00.1 SE – EPA**

| <b>EuropaBio's coordinated approach to General Surveillance: Existing Networks</b> |                                                                                                                                                                                                                                                                                                                                |                                                                                                                                                                                                                                                                                                                                                                                                                                                                                                                   |                                                                                                                                                                                                                                                                                              |
|------------------------------------------------------------------------------------|--------------------------------------------------------------------------------------------------------------------------------------------------------------------------------------------------------------------------------------------------------------------------------------------------------------------------------|-------------------------------------------------------------------------------------------------------------------------------------------------------------------------------------------------------------------------------------------------------------------------------------------------------------------------------------------------------------------------------------------------------------------------------------------------------------------------------------------------------------------|----------------------------------------------------------------------------------------------------------------------------------------------------------------------------------------------------------------------------------------------------------------------------------------------|
| <b>ORGANISATION</b>                                                                |                                                                                                                                                                                                                                                                                                                                |                                                                                                                                                                                                                                                                                                                                                                                                                                                                                                                   |                                                                                                                                                                                                                                                                                              |
| EuropaBio reference                                                                | GS-EN-09-0227                                                                                                                                                                                                                                                                                                                  |                                                                                                                                                                                                                                                                                                                                                                                                                                                                                                                   |                                                                                                                                                                                                                                                                                              |
| Official name of the Network                                                       | <b>EPA – Swedish Environmental Protection Agency<br/>Natur Vårds Verket</b>                                                                                                                                                                                                                                                    |                                                                                                                                                                                                                                                                                                                                                                                                                                                                                                                   |                                                                                                                                                                                                                                                                                              |
| Other names                                                                        |                                                                                                                                                                                                                                                                                                                                |                                                                                                                                                                                                                                                                                                                                                                                                                                                                                                                   |                                                                                                                                                                                                                                                                                              |
| Type of organisation                                                               | Governmental<br>Founded (unknown)                                                                                                                                                                                                                                                                                              |                                                                                                                                                                                                                                                                                                                                                                                                                                                                                                                   |                                                                                                                                                                                                                                                                                              |
| Coordinates                                                                        | Visitors' address:<br>STOCKHOLM: Valhallavägen 195.<br>ÖSTERSUND: Forskarens väg 5 (Campus Östersund, house Ub).<br>Postal Address:<br>SE-106 48 Stockholm<br><br>Fax: +46 8 20 29 25                                                                                                                                          |                                                                                                                                                                                                                                                                                                                                                                                                                                                                                                                   |                                                                                                                                                                                                                                                                                              |
| Website                                                                            | <a href="http://www.naturvardsverket.se">http://www.naturvardsverket.se</a><br><a href="http://www.swedishepa.se/">http://www.swedishepa.se/</a>                                                                                                                                                                               |                                                                                                                                                                                                                                                                                                                                                                                                                                                                                                                   |                                                                                                                                                                                                                                                                                              |
| Funding                                                                            | Government.                                                                                                                                                                                                                                                                                                                    |                                                                                                                                                                                                                                                                                                                                                                                                                                                                                                                   |                                                                                                                                                                                                                                                                                              |
| Conflict of interest                                                               | -                                                                                                                                                                                                                                                                                                                              |                                                                                                                                                                                                                                                                                                                                                                                                                                                                                                                   |                                                                                                                                                                                                                                                                                              |
| Part of other network(s)                                                           |                                                                                                                                                                                                                                                                                                                                |                                                                                                                                                                                                                                                                                                                                                                                                                                                                                                                   |                                                                                                                                                                                                                                                                                              |
| Grouping other network(s)                                                          |                                                                                                                                                                                                                                                                                                                                |                                                                                                                                                                                                                                                                                                                                                                                                                                                                                                                   |                                                                                                                                                                                                                                                                                              |
| <b>MONITORING SUBJECT</b>                                                          |                                                                                                                                                                                                                                                                                                                                |                                                                                                                                                                                                                                                                                                                                                                                                                                                                                                                   |                                                                                                                                                                                                                                                                                              |
| Description                                                                        | Helping to develop environmental policy and implementing.<br>Coordinating, monitoring and evaluating efforts, involving many agencies, to meet Sweden's environmental objectives                                                                                                                                               |                                                                                                                                                                                                                                                                                                                                                                                                                                                                                                                   |                                                                                                                                                                                                                                                                                              |
| Protection goal(s) and/or influencing factor(s)                                    | <input checked="" type="checkbox"/> Protection goal                                                                                                                                                                                                                                                                            | <input type="checkbox"/> Influencing factor                                                                                                                                                                                                                                                                                                                                                                                                                                                                       |                                                                                                                                                                                                                                                                                              |
|                                                                                    | <input checked="" type="checkbox"/> Biodiversity / general<br><input type="checkbox"/> Human Health<br><input type="checkbox"/> Animal Health<br><input type="checkbox"/> Plant Health<br><input type="checkbox"/> Soil function<br><input type="checkbox"/> Water quality<br><input type="checkbox"/> Sustainable Agriculture | <input type="checkbox"/> Agronomic practice<br><input type="checkbox"/> Plant protection<br><input type="checkbox"/> GMO cultivation<br><input type="checkbox"/> Environmental conditions                                                                                                                                                                                                                                                                                                                         |                                                                                                                                                                                                                                                                                              |
| Duplication of Farmer's questionnaire                                              | <input checked="" type="checkbox"/> No duplication<br><input type="checkbox"/> Partly duplication<br><input type="checkbox"/> Complete duplication                                                                                                                                                                             |                                                                                                                                                                                                                                                                                                                                                                                                                                                                                                                   |                                                                                                                                                                                                                                                                                              |
| <b>SPECIFICITY</b>                                                                 |                                                                                                                                                                                                                                                                                                                                |                                                                                                                                                                                                                                                                                                                                                                                                                                                                                                                   |                                                                                                                                                                                                                                                                                              |
| Geography                                                                          | <input type="checkbox"/> EU -wide                                                                                                                                                                                                                                                                                              |                                                                                                                                                                                                                                                                                                                                                                                                                                                                                                                   |                                                                                                                                                                                                                                                                                              |
|                                                                                    | <input checked="" type="checkbox"/> Zone A – North                                                                                                                                                                                                                                                                             | <input type="checkbox"/> Zone B – Centre:                                                                                                                                                                                                                                                                                                                                                                                                                                                                         | <input type="checkbox"/> Zone C – South                                                                                                                                                                                                                                                      |
|                                                                                    | <input type="checkbox"/> Denmark,<br><input type="checkbox"/> Estonia,<br><input type="checkbox"/> Latvia,<br><input type="checkbox"/> Lithuania,<br><input type="checkbox"/> Finland,<br><input checked="" type="checkbox"/> Sweden                                                                                           | <input type="checkbox"/> Belgium,<br><input type="checkbox"/> Czech Republic<br><input type="checkbox"/> Germany,<br><input type="checkbox"/> Ireland,<br><input type="checkbox"/> Luxembourg,<br><input type="checkbox"/> Hungary,<br><input type="checkbox"/> Netherlands,<br><input type="checkbox"/> Austria,<br><input type="checkbox"/> Poland,<br><input type="checkbox"/> Romania,<br><input type="checkbox"/> Slovenia,<br><input type="checkbox"/> Slovakia,<br><input type="checkbox"/> United Kingdom | <input type="checkbox"/> Bulgaria,<br><input type="checkbox"/> Greece,<br><input type="checkbox"/> Spain,<br><input type="checkbox"/> France,<br><input type="checkbox"/> Italy,<br><input type="checkbox"/> Cyprus,<br><input type="checkbox"/> Malta,<br><input type="checkbox"/> Portugal |
|                                                                                    | <input type="checkbox"/> Regional (specify)<br><input type="checkbox"/> Local (specify)                                                                                                                                                                                                                                        |                                                                                                                                                                                                                                                                                                                                                                                                                                                                                                                   |                                                                                                                                                                                                                                                                                              |
| Factors                                                                            | <input checked="" type="checkbox"/> Multiple species/items (specify): general flora and fauna<br><input type="checkbox"/> Single species/item (specify):                                                                                                                                                                       |                                                                                                                                                                                                                                                                                                                                                                                                                                                                                                                   |                                                                                                                                                                                                                                                                                              |
| Crop                                                                               | <input checked="" type="checkbox"/> No specific crop(s)<br><input type="checkbox"/> Several crops (e.g. all cereals)<br><input type="checkbox"/> Single crop                                                                                                                                                                   |                                                                                                                                                                                                                                                                                                                                                                                                                                                                                                                   |                                                                                                                                                                                                                                                                                              |
| Trait /treatment                                                                   | <input checked="" type="checkbox"/> No specific traits/treatments<br><input type="checkbox"/> Several traits/treatments<br><input type="checkbox"/> Single trait/treatment                                                                                                                                                     |                                                                                                                                                                                                                                                                                                                                                                                                                                                                                                                   |                                                                                                                                                                                                                                                                                              |

|                                                                 |                                                                                                                                                                                                                                                                                   |
|-----------------------------------------------------------------|-----------------------------------------------------------------------------------------------------------------------------------------------------------------------------------------------------------------------------------------------------------------------------------|
| GMO                                                             | <input checked="" type="checkbox"/> No GMO bias<br><input type="checkbox"/> GMO specific                                                                                                                                                                                          |
| <b>METHODOLOGY</b>                                              |                                                                                                                                                                                                                                                                                   |
| Observations                                                    | <input checked="" type="checkbox"/> Reported, verifiable methodology<br><input type="checkbox"/> Reported, unverifiable methodology<br><input type="checkbox"/> Unknown, unverifiable methodology                                                                                 |
| Frequency                                                       | <input checked="" type="checkbox"/> > 1 time/year<br><input type="checkbox"/> 1 time/year<br><input type="checkbox"/> < 1 time/year                                                                                                                                               |
| Future                                                          | <input checked="" type="checkbox"/> For ≥ 5 years<br><input type="checkbox"/> between 1 and 5 years<br><input type="checkbox"/> no prospect                                                                                                                                       |
| Quality of performers                                           | <input checked="" type="checkbox"/> Trained, professionals<br><input type="checkbox"/> Trained, non-professionals – training by documentation, volunteers<br><input type="checkbox"/> Uncertain or not -specified                                                                 |
| Quality of data                                                 | <input type="checkbox"/> Standard recording of raw data<br><input type="checkbox"/> Free recording of raw data<br><input type="checkbox"/> Anecdotic                                                                                                                              |
| Analysis                                                        | <input checked="" type="checkbox"/> Reported, verifiable methodology<br><input type="checkbox"/> Reported, unverifiable methodology<br><input type="checkbox"/> Unknown, unverifiable methodology                                                                                 |
| Quality of analysis                                             | <input checked="" type="checkbox"/> Scientifically based<br><input type="checkbox"/> Indicative only<br><input type="checkbox"/> Unknown                                                                                                                                          |
| <b>REPORTING</b>                                                |                                                                                                                                                                                                                                                                                   |
| Language                                                        | Reporting language(s): Swedish/English                                                                                                                                                                                                                                            |
| Availability                                                    | <input checked="" type="checkbox"/> Scientific publication<br><input checked="" type="checkbox"/> Official report available on the internet or in other public forum<br><input type="checkbox"/> Official report available from network<br><input type="checkbox"/> Not available |
| Frequency                                                       | <input checked="" type="checkbox"/> ≥ 1 time/year<br><input type="checkbox"/> < 1 time/year                                                                                                                                                                                       |
| Historical reference                                            | <input checked="" type="checkbox"/> over ≥ 5 years<br><input type="checkbox"/> between 1 and 5 years<br><input type="checkbox"/> no historical analysis                                                                                                                           |
| <b>COMMENT(S)</b>                                               |                                                                                                                                                                                                                                                                                   |
| Publications on certain subjects, e.g. 'Biodiversity in Sweden' |                                                                                                                                                                                                                                                                                   |

## GSEN-09-0231.00.1 SE – Swedish bird survey

| EuropaBio's coordinated approach to General Surveillance: Existing Networks |                                                                                                                                                                                                                                                                                                                                                                             |                                                                                                                                                                                                                                                                                                                                                                                                                                                                                                                   |                                                                                                                                                                                                                                                                                              |
|-----------------------------------------------------------------------------|-----------------------------------------------------------------------------------------------------------------------------------------------------------------------------------------------------------------------------------------------------------------------------------------------------------------------------------------------------------------------------|-------------------------------------------------------------------------------------------------------------------------------------------------------------------------------------------------------------------------------------------------------------------------------------------------------------------------------------------------------------------------------------------------------------------------------------------------------------------------------------------------------------------|----------------------------------------------------------------------------------------------------------------------------------------------------------------------------------------------------------------------------------------------------------------------------------------------|
| ORGANISATION                                                                |                                                                                                                                                                                                                                                                                                                                                                             |                                                                                                                                                                                                                                                                                                                                                                                                                                                                                                                   |                                                                                                                                                                                                                                                                                              |
| EuropaBio reference                                                         | GS-EN-09-0231                                                                                                                                                                                                                                                                                                                                                               |                                                                                                                                                                                                                                                                                                                                                                                                                                                                                                                   |                                                                                                                                                                                                                                                                                              |
| Official name of the Network                                                | <b>Svensk Fågeltaxering</b>                                                                                                                                                                                                                                                                                                                                                 |                                                                                                                                                                                                                                                                                                                                                                                                                                                                                                                   |                                                                                                                                                                                                                                                                                              |
| Other names                                                                 | Lund University: The Swedish Bird Survey                                                                                                                                                                                                                                                                                                                                    |                                                                                                                                                                                                                                                                                                                                                                                                                                                                                                                   |                                                                                                                                                                                                                                                                                              |
| Type of organisation                                                        | Academic                                                                                                                                                                                                                                                                                                                                                                    |                                                                                                                                                                                                                                                                                                                                                                                                                                                                                                                   |                                                                                                                                                                                                                                                                                              |
| Coordinates                                                                 | Lund University<br>Ekologihuset<br>223 62 Lund<br><br>Fax: +46-222 4716                                                                                                                                                                                                                                                                                                     |                                                                                                                                                                                                                                                                                                                                                                                                                                                                                                                   |                                                                                                                                                                                                                                                                                              |
| Website                                                                     | <a href="http://www.lu.se/o.o.i.s/15056">http://www.lu.se/o.o.i.s/15056</a><br><a href="http://www.zoo.ekol.lu.se/birdmonitoring/">http://www.zoo.ekol.lu.se/birdmonitoring/</a>                                                                                                                                                                                            |                                                                                                                                                                                                                                                                                                                                                                                                                                                                                                                   |                                                                                                                                                                                                                                                                                              |
| Funding                                                                     | The Swedish Environmental Protection Agency                                                                                                                                                                                                                                                                                                                                 |                                                                                                                                                                                                                                                                                                                                                                                                                                                                                                                   |                                                                                                                                                                                                                                                                                              |
| Conflict of interest                                                        | -                                                                                                                                                                                                                                                                                                                                                                           |                                                                                                                                                                                                                                                                                                                                                                                                                                                                                                                   |                                                                                                                                                                                                                                                                                              |
| Part of other network(s)                                                    | Delivers data to the European Bird Census Council                                                                                                                                                                                                                                                                                                                           |                                                                                                                                                                                                                                                                                                                                                                                                                                                                                                                   |                                                                                                                                                                                                                                                                                              |
| Grouping other network(s)                                                   | Several regional groups of volunteers. Project of the Ministry of Ecology, Lund University, in the framework of the Environmental Monitoring Programme                                                                                                                                                                                                                      |                                                                                                                                                                                                                                                                                                                                                                                                                                                                                                                   |                                                                                                                                                                                                                                                                                              |
| MONITORING SUBJECT                                                          |                                                                                                                                                                                                                                                                                                                                                                             |                                                                                                                                                                                                                                                                                                                                                                                                                                                                                                                   |                                                                                                                                                                                                                                                                                              |
| Description                                                                 | Bird indicators are used to assess the progress towards achieving the environmental objectives set by the Swedish parliament. Presently there are indicators for "Sustainable forests", "A varied agricultural landscape" and "A magnificent mountain landscape".                                                                                                           |                                                                                                                                                                                                                                                                                                                                                                                                                                                                                                                   |                                                                                                                                                                                                                                                                                              |
| Protection goal(s) and/or influencing factor(s)                             | <input checked="" type="checkbox"/> Protection goal<br><input checked="" type="checkbox"/> Biodiversity<br><input type="checkbox"/> Human Health<br><input type="checkbox"/> Animal Health<br><input type="checkbox"/> Plant Health<br><input type="checkbox"/> Soil function<br><input type="checkbox"/> Water quality<br><input type="checkbox"/> Sustainable Agriculture | <input type="checkbox"/> Influencing factor<br><input type="checkbox"/> Agronomic practice<br><input type="checkbox"/> Plant protection<br><input type="checkbox"/> GMO cultivation<br><input type="checkbox"/> Environmental conditions                                                                                                                                                                                                                                                                          |                                                                                                                                                                                                                                                                                              |
| Duplication of Farmer's questionnaire                                       | <input checked="" type="checkbox"/> No duplication<br><input type="checkbox"/> Partly duplication<br><input type="checkbox"/> Complete duplication                                                                                                                                                                                                                          |                                                                                                                                                                                                                                                                                                                                                                                                                                                                                                                   |                                                                                                                                                                                                                                                                                              |
| SPECIFICITY                                                                 |                                                                                                                                                                                                                                                                                                                                                                             |                                                                                                                                                                                                                                                                                                                                                                                                                                                                                                                   |                                                                                                                                                                                                                                                                                              |
| Geography                                                                   | <input type="checkbox"/> EU -wide<br><input checked="" type="checkbox"/> Zone A – North<br><input type="checkbox"/> Zone B – Centre:<br><input type="checkbox"/> Zone C – South                                                                                                                                                                                             |                                                                                                                                                                                                                                                                                                                                                                                                                                                                                                                   |                                                                                                                                                                                                                                                                                              |
|                                                                             | <input type="checkbox"/> Denmark,<br><input type="checkbox"/> Estonia,<br><input type="checkbox"/> Latvia,<br><input type="checkbox"/> Lithuania,<br><input type="checkbox"/> Finland,<br><input checked="" type="checkbox"/> Sweden                                                                                                                                        | <input type="checkbox"/> Belgium,<br><input type="checkbox"/> Czech Republic<br><input type="checkbox"/> Germany,<br><input type="checkbox"/> Ireland,<br><input type="checkbox"/> Luxembourg,<br><input type="checkbox"/> Hungary,<br><input type="checkbox"/> Netherlands,<br><input type="checkbox"/> Austria,<br><input type="checkbox"/> Poland,<br><input type="checkbox"/> Romania,<br><input type="checkbox"/> Slovenia,<br><input type="checkbox"/> Slovakia,<br><input type="checkbox"/> United Kingdom | <input type="checkbox"/> Bulgaria,<br><input type="checkbox"/> Greece,<br><input type="checkbox"/> Spain,<br><input type="checkbox"/> France,<br><input type="checkbox"/> Italy,<br><input type="checkbox"/> Cyprus,<br><input type="checkbox"/> Malta,<br><input type="checkbox"/> Portugal |
|                                                                             | <input type="checkbox"/> Regional (specify)<br><input type="checkbox"/> Local (specify)                                                                                                                                                                                                                                                                                     |                                                                                                                                                                                                                                                                                                                                                                                                                                                                                                                   |                                                                                                                                                                                                                                                                                              |
| Factors                                                                     | <input checked="" type="checkbox"/> Multiple species/items (specify): birds, mammals<br><input type="checkbox"/> Single species/item (specify):                                                                                                                                                                                                                             |                                                                                                                                                                                                                                                                                                                                                                                                                                                                                                                   |                                                                                                                                                                                                                                                                                              |
| Crop                                                                        | <input checked="" type="checkbox"/> No specific crop(s)<br><input type="checkbox"/> Several crops (e.g. all cereals)<br><input type="checkbox"/> Single crop                                                                                                                                                                                                                |                                                                                                                                                                                                                                                                                                                                                                                                                                                                                                                   |                                                                                                                                                                                                                                                                                              |
| Trait /treatment                                                            | <input checked="" type="checkbox"/> No specific traits/treatments<br><input type="checkbox"/> Several traits/treatments<br><input type="checkbox"/> Single trait/treatment                                                                                                                                                                                                  |                                                                                                                                                                                                                                                                                                                                                                                                                                                                                                                   |                                                                                                                                                                                                                                                                                              |
| GMO                                                                         | <input checked="" type="checkbox"/> No GMO bias<br><input type="checkbox"/> GMO specific                                                                                                                                                                                                                                                                                    |                                                                                                                                                                                                                                                                                                                                                                                                                                                                                                                   |                                                                                                                                                                                                                                                                                              |

| <b>METHODOLOGY</b>                                                                                                                                                                                                |                                                                                                                                                                                                                                                                        |
|-------------------------------------------------------------------------------------------------------------------------------------------------------------------------------------------------------------------|------------------------------------------------------------------------------------------------------------------------------------------------------------------------------------------------------------------------------------------------------------------------|
| Observations                                                                                                                                                                                                      | <input checked="" type="checkbox"/> Reported, verifiable methodology<br><input type="checkbox"/> Reported, unverifiable methodology<br><input type="checkbox"/> Unknown, unverifiable methodology                                                                      |
| Frequency                                                                                                                                                                                                         | <input checked="" type="checkbox"/> > 1 time/year<br><input type="checkbox"/> 1 time/year<br><input type="checkbox"/> < 1 time/year                                                                                                                                    |
| Future                                                                                                                                                                                                            | <input checked="" type="checkbox"/> For ≥ 5 years<br><input type="checkbox"/> between 1 and 5 years<br><input type="checkbox"/> no prospect                                                                                                                            |
| Quality of performers                                                                                                                                                                                             | <input type="checkbox"/> Trained, professionals<br><input type="checkbox"/> Trained, non-professionals – training by documentation, volunteers<br><input type="checkbox"/> Uncertain or not -specified                                                                 |
| Quality of data                                                                                                                                                                                                   | <input checked="" type="checkbox"/> Standard recording of raw data<br><input type="checkbox"/> Free recording of raw data<br><input type="checkbox"/> Anecdotic                                                                                                        |
| Analysis                                                                                                                                                                                                          | <input checked="" type="checkbox"/> Reported, verifiable methodology<br><input type="checkbox"/> Reported, unverifiable methodology<br><input type="checkbox"/> Unknown, unverifiable methodology                                                                      |
| Quality of analysis                                                                                                                                                                                               | <input checked="" type="checkbox"/> Scientifically based<br><input type="checkbox"/> Indicative only<br><input type="checkbox"/> Unknown                                                                                                                               |
| <b>REPORTING</b>                                                                                                                                                                                                  |                                                                                                                                                                                                                                                                        |
| Language                                                                                                                                                                                                          | Reporting language(s): English/Swedish                                                                                                                                                                                                                                 |
| Availability                                                                                                                                                                                                      | <input checked="" type="checkbox"/> Scientific publication<br><input type="checkbox"/> Official report available on the internet or in other public forum<br><input type="checkbox"/> Official report available from network<br><input type="checkbox"/> Not available |
| Frequency                                                                                                                                                                                                         | <input type="checkbox"/> ≥ 1 time/year<br><input type="checkbox"/> < 1 time/year                                                                                                                                                                                       |
| Historical reference                                                                                                                                                                                              | <input type="checkbox"/> over ≥ 5 years<br><input type="checkbox"/> between 1 and 5 years<br><input type="checkbox"/> no historical analysis                                                                                                                           |
| <b>COMMENT(S)</b>                                                                                                                                                                                                 |                                                                                                                                                                                                                                                                        |
| Monitoring network using important bird and mammal species as representative indicators and as protection goals. The website/reports are documented and provide detailed information on methodology and findings. |                                                                                                                                                                                                                                                                        |

## United Kingdom

## GSEN-09-0150.00.1 GB – National Bee Unit

| EuropaBio's coordinated approach to General Surveillance: Existing Networks |                                                                                                                                                                                                                                                                                                                                                                                                                                                                                                                                                                                      |                                                                                                                                                                                                                                              |  |
|-----------------------------------------------------------------------------|--------------------------------------------------------------------------------------------------------------------------------------------------------------------------------------------------------------------------------------------------------------------------------------------------------------------------------------------------------------------------------------------------------------------------------------------------------------------------------------------------------------------------------------------------------------------------------------|----------------------------------------------------------------------------------------------------------------------------------------------------------------------------------------------------------------------------------------------|--|
| <b>ORGANISATION</b>                                                         |                                                                                                                                                                                                                                                                                                                                                                                                                                                                                                                                                                                      |                                                                                                                                                                                                                                              |  |
| EuropaBio reference                                                         | GS-EN-09-0150                                                                                                                                                                                                                                                                                                                                                                                                                                                                                                                                                                        |                                                                                                                                                                                                                                              |  |
| Official name of the Network                                                | <b>The National Bee Unit</b><br>The Food and Environment Research Agency                                                                                                                                                                                                                                                                                                                                                                                                                                                                                                             |                                                                                                                                                                                                                                              |  |
| Other names                                                                 | <b>NBU</b>                                                                                                                                                                                                                                                                                                                                                                                                                                                                                                                                                                           |                                                                                                                                                                                                                                              |  |
| Type of organisation                                                        | Governmental<br>Founded 1979                                                                                                                                                                                                                                                                                                                                                                                                                                                                                                                                                         |                                                                                                                                                                                                                                              |  |
| Coordinates                                                                 | National Bee Unit, The Food and Environment Research Agency,<br>Sand Hutton, York, YO41 1LZ<br><br>Fax: +44(0)1904 462240<br>Email: nbu[at]fera.gsi.gov.uk                                                                                                                                                                                                                                                                                                                                                                                                                           |                                                                                                                                                                                                                                              |  |
| Website                                                                     | <a href="https://secure.csl.gov.uk/beebase/index.cfm">https://secure.csl.gov.uk/beebase/index.cfm</a>                                                                                                                                                                                                                                                                                                                                                                                                                                                                                |                                                                                                                                                                                                                                              |  |
| Funding                                                                     | Government                                                                                                                                                                                                                                                                                                                                                                                                                                                                                                                                                                           |                                                                                                                                                                                                                                              |  |
| Conflict of interest                                                        | -                                                                                                                                                                                                                                                                                                                                                                                                                                                                                                                                                                                    |                                                                                                                                                                                                                                              |  |
| Part of other network(s)                                                    |                                                                                                                                                                                                                                                                                                                                                                                                                                                                                                                                                                                      |                                                                                                                                                                                                                                              |  |
| Grouping other network(s)                                                   | Regional inspectors                                                                                                                                                                                                                                                                                                                                                                                                                                                                                                                                                                  |                                                                                                                                                                                                                                              |  |
| <b>MONITORING SUBJECT</b>                                                   |                                                                                                                                                                                                                                                                                                                                                                                                                                                                                                                                                                                      |                                                                                                                                                                                                                                              |  |
| Description                                                                 | Aims to protect the honeybee, an essential pollinator of crops and wild plants, from threats such as serious disease and environmental damage                                                                                                                                                                                                                                                                                                                                                                                                                                        |                                                                                                                                                                                                                                              |  |
| Protection goal(s) and/or influencing factor(s)                             | <input checked="" type="checkbox"/> Protection goal<br><br><input checked="" type="checkbox"/> Biodiversity: insects<br><input type="checkbox"/> Human Health<br><input type="checkbox"/> Animal Health<br><input type="checkbox"/> Plant Health<br><input type="checkbox"/> Soil function<br><input type="checkbox"/> Water quality<br><input type="checkbox"/> Sustainable Agriculture                                                                                                                                                                                             | <input type="checkbox"/> Influencing factor<br><br><input type="checkbox"/> Agronomic practice<br><input type="checkbox"/> Plant protection<br><input type="checkbox"/> GMO cultivation<br><input type="checkbox"/> Environmental conditions |  |
| Duplication of Farmer's questionnaire                                       | <input checked="" type="checkbox"/> No duplication<br><input type="checkbox"/> Partly duplication<br><input type="checkbox"/> Complete duplication                                                                                                                                                                                                                                                                                                                                                                                                                                   |                                                                                                                                                                                                                                              |  |
| <b>SPECIFICITY</b>                                                          |                                                                                                                                                                                                                                                                                                                                                                                                                                                                                                                                                                                      |                                                                                                                                                                                                                                              |  |
| Geography                                                                   | <input type="checkbox"/> EU -wide<br><br><input type="checkbox"/> Zone A – North<br><input type="checkbox"/> Denmark,<br><input type="checkbox"/> Estonia,<br><input type="checkbox"/> Latvia,<br><input type="checkbox"/> Lithuania,<br><input type="checkbox"/> Finland,<br><input type="checkbox"/> Sweden                                                                                                                                                                                                                                                                        |                                                                                                                                                                                                                                              |  |
|                                                                             | <input checked="" type="checkbox"/> Zone B – Centre:<br><input type="checkbox"/> Belgium,<br><input type="checkbox"/> Czech Republic<br><input type="checkbox"/> Germany,<br><input type="checkbox"/> Ireland,<br><input type="checkbox"/> Luxembourg,<br><input type="checkbox"/> Hungary,<br><input type="checkbox"/> Netherlands,<br><input type="checkbox"/> Austria,<br><input type="checkbox"/> Poland,<br><input type="checkbox"/> Romania,<br><input type="checkbox"/> Slovenia,<br><input type="checkbox"/> Slovakia,<br><input checked="" type="checkbox"/> United Kingdom |                                                                                                                                                                                                                                              |  |
|                                                                             | <input type="checkbox"/> Zone C – South<br><input type="checkbox"/> Bulgaria,<br><input type="checkbox"/> Greece,<br><input type="checkbox"/> Spain,<br><input type="checkbox"/> France,<br><input type="checkbox"/> Italy,<br><input type="checkbox"/> Cyprus,<br><input type="checkbox"/> Malta,<br><input type="checkbox"/> Portugal                                                                                                                                                                                                                                              |                                                                                                                                                                                                                                              |  |
|                                                                             | <input checked="" type="checkbox"/> Regional (specify): England and Wales<br><input type="checkbox"/> Local (specify)                                                                                                                                                                                                                                                                                                                                                                                                                                                                |                                                                                                                                                                                                                                              |  |
| Factors                                                                     | <input type="checkbox"/> Multiple species/items (specify)<br><input checked="" type="checkbox"/> Single species/item (specify): Bees                                                                                                                                                                                                                                                                                                                                                                                                                                                 |                                                                                                                                                                                                                                              |  |
| Crop                                                                        | <input checked="" type="checkbox"/> No specific crop(s)<br><input type="checkbox"/> Several crops (e.g. all cereals)<br><input type="checkbox"/> Single crop                                                                                                                                                                                                                                                                                                                                                                                                                         |                                                                                                                                                                                                                                              |  |
| Trait /treatment                                                            | <input checked="" type="checkbox"/> No specific traits/treatments<br><input type="checkbox"/> Several traits/treatments<br><input type="checkbox"/> Single trait/treatment                                                                                                                                                                                                                                                                                                                                                                                                           |                                                                                                                                                                                                                                              |  |
| GMO                                                                         | <input checked="" type="checkbox"/> No GMO bias<br><input type="checkbox"/> GMO specific                                                                                                                                                                                                                                                                                                                                                                                                                                                                                             |                                                                                                                                                                                                                                              |  |
| <b>METHODOLOGY</b>                                                          |                                                                                                                                                                                                                                                                                                                                                                                                                                                                                                                                                                                      |                                                                                                                                                                                                                                              |  |

|                                                                                                                                                                                             |                                                                                                                                                                                                                                                                                   |
|---------------------------------------------------------------------------------------------------------------------------------------------------------------------------------------------|-----------------------------------------------------------------------------------------------------------------------------------------------------------------------------------------------------------------------------------------------------------------------------------|
| Observations                                                                                                                                                                                | <input checked="" type="checkbox"/> Reported, verifiable methodology<br><input type="checkbox"/> Reported, unverifiable methodology<br><input type="checkbox"/> Unknown, unverifiable methodology                                                                                 |
| Frequency                                                                                                                                                                                   | <input checked="" type="checkbox"/> > 1 time/year<br><input type="checkbox"/> 1 time/year<br><input type="checkbox"/> < 1 time/year                                                                                                                                               |
| Future                                                                                                                                                                                      | <input checked="" type="checkbox"/> For $\geq 5$ years<br><input type="checkbox"/> between 1 and 5 years<br><input type="checkbox"/> no prospect                                                                                                                                  |
| Quality of performers                                                                                                                                                                       | <input checked="" type="checkbox"/> Trained, professionals<br><input type="checkbox"/> Trained, non-professionals – training by documentation, volunteers<br><input type="checkbox"/> Uncertain or not -specified                                                                 |
| Quality of data                                                                                                                                                                             | <input checked="" type="checkbox"/> Standard recording of raw data<br><input type="checkbox"/> Free recording of raw data<br><input type="checkbox"/> Anecdotic                                                                                                                   |
| Analysis                                                                                                                                                                                    | <input checked="" type="checkbox"/> Reported, verifiable methodology<br><input type="checkbox"/> Reported, unverifiable methodology<br><input type="checkbox"/> Unknown, unverifiable methodology                                                                                 |
| Quality of analysis                                                                                                                                                                         | <input checked="" type="checkbox"/> Scientifically based<br><input type="checkbox"/> Indicative only<br><input type="checkbox"/> Unknown                                                                                                                                          |
| <b>REPORTING</b>                                                                                                                                                                            |                                                                                                                                                                                                                                                                                   |
| Language                                                                                                                                                                                    | Reporting language(s): English                                                                                                                                                                                                                                                    |
| Availability                                                                                                                                                                                | <input checked="" type="checkbox"/> Scientific publication<br><input checked="" type="checkbox"/> Official report available on the internet or in other public forum<br><input type="checkbox"/> Official report available from network<br><input type="checkbox"/> Not available |
| Frequency                                                                                                                                                                                   | <input checked="" type="checkbox"/> $\geq 1$ time/year –<br><input type="checkbox"/> < 1 time/year                                                                                                                                                                                |
| Historical reference                                                                                                                                                                        | <input checked="" type="checkbox"/> over $\geq 5$ years<br><input type="checkbox"/> between 1 and 5 years<br><input type="checkbox"/> no historical analysis                                                                                                                      |
| <b>COMMENT(S)</b>                                                                                                                                                                           |                                                                                                                                                                                                                                                                                   |
| A research unit working on pest and disease threats to bee colonies, residue analysis in honey. Bee Health Statistics published annually. Bee inspectors collect data in England and Wales. |                                                                                                                                                                                                                                                                                   |

## GSEN-09-0164.00.2 GB – ACCS

| EuropaBio's coordinated approach to General Surveillance: Existing Networks |                                                                                                                                                                                                                                                                                                                                                                                      |                                                                                                                                                                                                                                                                                                                                                                                                                                                                                                                              |                                                                                                                                                                                                                                                                                              |
|-----------------------------------------------------------------------------|--------------------------------------------------------------------------------------------------------------------------------------------------------------------------------------------------------------------------------------------------------------------------------------------------------------------------------------------------------------------------------------|------------------------------------------------------------------------------------------------------------------------------------------------------------------------------------------------------------------------------------------------------------------------------------------------------------------------------------------------------------------------------------------------------------------------------------------------------------------------------------------------------------------------------|----------------------------------------------------------------------------------------------------------------------------------------------------------------------------------------------------------------------------------------------------------------------------------------------|
| <b>ORGANISATION</b>                                                         |                                                                                                                                                                                                                                                                                                                                                                                      |                                                                                                                                                                                                                                                                                                                                                                                                                                                                                                                              |                                                                                                                                                                                                                                                                                              |
| EuropaBio reference                                                         | GS-EN-09-0164                                                                                                                                                                                                                                                                                                                                                                        |                                                                                                                                                                                                                                                                                                                                                                                                                                                                                                                              |                                                                                                                                                                                                                                                                                              |
| Official name of the Network                                                | <b>Red Tractor Farm Assurance Combinable Crops &amp; Sugar Beet Scheme (formerly: Assured Combinable Crops Scheme)</b><br>subsidiary of Assured Food Standards (AFS)                                                                                                                                                                                                                 |                                                                                                                                                                                                                                                                                                                                                                                                                                                                                                                              |                                                                                                                                                                                                                                                                                              |
| Other names                                                                 | Formerly ACCS                                                                                                                                                                                                                                                                                                                                                                        |                                                                                                                                                                                                                                                                                                                                                                                                                                                                                                                              |                                                                                                                                                                                                                                                                                              |
| Type of organisation                                                        | Professional<br>Founded 1998                                                                                                                                                                                                                                                                                                                                                         |                                                                                                                                                                                                                                                                                                                                                                                                                                                                                                                              |                                                                                                                                                                                                                                                                                              |
| Coordinates                                                                 | Assured Combinable Crops Secretariat<br>Unit 4b, Highway Farm<br>Horsley Road, Downside<br>Cobham, Surrey<br>KT11 3JZ<br><br>Fax: 01932 589800<br>Email: info[at]assuredcrops.co.uk                                                                                                                                                                                                  |                                                                                                                                                                                                                                                                                                                                                                                                                                                                                                                              |                                                                                                                                                                                                                                                                                              |
| Website                                                                     | <a href="http://assurance.redtractor.org.uk/rtassurance/home.eb">http://assurance.redtractor.org.uk/rtassurance/home.eb</a>                                                                                                                                                                                                                                                          |                                                                                                                                                                                                                                                                                                                                                                                                                                                                                                                              |                                                                                                                                                                                                                                                                                              |
| Funding                                                                     | Owned by several organisations in the food supply chain                                                                                                                                                                                                                                                                                                                              |                                                                                                                                                                                                                                                                                                                                                                                                                                                                                                                              |                                                                                                                                                                                                                                                                                              |
| Conflict of interest                                                        | -                                                                                                                                                                                                                                                                                                                                                                                    |                                                                                                                                                                                                                                                                                                                                                                                                                                                                                                                              |                                                                                                                                                                                                                                                                                              |
| Part of other network(s)                                                    | -                                                                                                                                                                                                                                                                                                                                                                                    |                                                                                                                                                                                                                                                                                                                                                                                                                                                                                                                              |                                                                                                                                                                                                                                                                                              |
| Grouping other network(s)                                                   | -                                                                                                                                                                                                                                                                                                                                                                                    |                                                                                                                                                                                                                                                                                                                                                                                                                                                                                                                              |                                                                                                                                                                                                                                                                                              |
| <b>MONITORING SUBJECT</b>                                                   |                                                                                                                                                                                                                                                                                                                                                                                      |                                                                                                                                                                                                                                                                                                                                                                                                                                                                                                                              |                                                                                                                                                                                                                                                                                              |
| Description                                                                 | Best practice management, record-keeping & independent audit of on-farm standards                                                                                                                                                                                                                                                                                                    |                                                                                                                                                                                                                                                                                                                                                                                                                                                                                                                              |                                                                                                                                                                                                                                                                                              |
| Protection goal(s) and/or influencing factor(s)                             | <input checked="" type="checkbox"/> Protection goal<br><input type="checkbox"/> Biodiversity: general<br><input type="checkbox"/> Human Health<br><input type="checkbox"/> Animal Health<br><input type="checkbox"/> Plant Health<br><input type="checkbox"/> Soil function<br><input type="checkbox"/> Water quality<br><input checked="" type="checkbox"/> Sustainable Agriculture | <input checked="" type="checkbox"/> Influencing factor<br><input checked="" type="checkbox"/> Agronomic practice<br><input type="checkbox"/> Plant protection<br><input type="checkbox"/> GMO cultivation<br><input type="checkbox"/> Environmental conditions                                                                                                                                                                                                                                                               |                                                                                                                                                                                                                                                                                              |
| Duplication of Farmer's questionnaire                                       | <input type="checkbox"/> No duplication<br><input checked="" type="checkbox"/> Partly duplication<br><input type="checkbox"/> Complete duplication                                                                                                                                                                                                                                   |                                                                                                                                                                                                                                                                                                                                                                                                                                                                                                                              |                                                                                                                                                                                                                                                                                              |
| <b>SPECIFICITY</b>                                                          |                                                                                                                                                                                                                                                                                                                                                                                      |                                                                                                                                                                                                                                                                                                                                                                                                                                                                                                                              |                                                                                                                                                                                                                                                                                              |
| Geography                                                                   | <input type="checkbox"/> EU -wide<br><input type="checkbox"/> Zone A – North<br><input checked="" type="checkbox"/> Zone B – Centre:<br><input type="checkbox"/> Zone C – South                                                                                                                                                                                                      |                                                                                                                                                                                                                                                                                                                                                                                                                                                                                                                              |                                                                                                                                                                                                                                                                                              |
|                                                                             | <input type="checkbox"/> Denmark,<br><input type="checkbox"/> Estonia,<br><input type="checkbox"/> Latvia,<br><input type="checkbox"/> Lithuania,<br><input type="checkbox"/> Finland,<br><input type="checkbox"/> Sweden                                                                                                                                                            | <input type="checkbox"/> Belgium,<br><input type="checkbox"/> Czech Republic<br><input type="checkbox"/> Germany,<br><input type="checkbox"/> Ireland,<br><input type="checkbox"/> Luxembourg,<br><input type="checkbox"/> Hungary,<br><input type="checkbox"/> Netherlands,<br><input type="checkbox"/> Austria,<br><input type="checkbox"/> Poland,<br><input type="checkbox"/> Romania,<br><input type="checkbox"/> Slovenia,<br><input type="checkbox"/> Slovakia,<br><input checked="" type="checkbox"/> United Kingdom | <input type="checkbox"/> Bulgaria,<br><input type="checkbox"/> Greece,<br><input type="checkbox"/> Spain,<br><input type="checkbox"/> France,<br><input type="checkbox"/> Italy,<br><input type="checkbox"/> Cyprus,<br><input type="checkbox"/> Malta,<br><input type="checkbox"/> Portugal |
|                                                                             | <input type="checkbox"/> Regional (specify)<br><input type="checkbox"/> Local (specify)                                                                                                                                                                                                                                                                                              |                                                                                                                                                                                                                                                                                                                                                                                                                                                                                                                              |                                                                                                                                                                                                                                                                                              |
| Factors                                                                     | <input checked="" type="checkbox"/> Multiple species/items (specify): agronomic practice<br><input type="checkbox"/> Single species/item (specify)                                                                                                                                                                                                                                   |                                                                                                                                                                                                                                                                                                                                                                                                                                                                                                                              |                                                                                                                                                                                                                                                                                              |
| Crop                                                                        | <input type="checkbox"/> No specific crop(s)<br><input checked="" type="checkbox"/> Several crops (e.g. all cereals): wheat, barley and rye, oilseeds such as linseed and rapeseed, pulses such as peas and beans, and sugar beet<br><input type="checkbox"/> Single crop                                                                                                            |                                                                                                                                                                                                                                                                                                                                                                                                                                                                                                                              |                                                                                                                                                                                                                                                                                              |
| Trait /treatment                                                            | <input type="checkbox"/> No specific traits/treatments<br><input type="checkbox"/> Several traits/treatments: best practice<br><input type="checkbox"/> Single trait/treatment                                                                                                                                                                                                       |                                                                                                                                                                                                                                                                                                                                                                                                                                                                                                                              |                                                                                                                                                                                                                                                                                              |



|                                                                                                                                                                                                                                                                  |                                                                                                                                                                                                                                                             |
|------------------------------------------------------------------------------------------------------------------------------------------------------------------------------------------------------------------------------------------------------------------|-------------------------------------------------------------------------------------------------------------------------------------------------------------------------------------------------------------------------------------------------------------|
| GMO                                                                                                                                                                                                                                                              | <input checked="" type="checkbox"/> No GMO bias<br><input type="checkbox"/> GMO specific                                                                                                                                                                    |
| <b>METHODOLOGY</b>                                                                                                                                                                                                                                               |                                                                                                                                                                                                                                                             |
| Observations                                                                                                                                                                                                                                                     | <input type="checkbox"/> Reported, verifiable methodology<br><input type="checkbox"/> Reported, unverifiable methodology<br><input type="checkbox"/> Unknown, unverifiable methodology                                                                      |
| Frequency                                                                                                                                                                                                                                                        | <input type="checkbox"/> > 1 time/year<br><input checked="" type="checkbox"/> 1 time/year:<br><input type="checkbox"/> < 1 time/year                                                                                                                        |
| Future                                                                                                                                                                                                                                                           | <input checked="" type="checkbox"/> For ≥ 5 years<br><input type="checkbox"/> between 1 and 5 years<br><input type="checkbox"/> no prospect                                                                                                                 |
| Quality of performers                                                                                                                                                                                                                                            | <input checked="" type="checkbox"/> Trained, professionals<br><input type="checkbox"/> Trained, non-professionals – farmers<br><input type="checkbox"/> Uncertain or not -specified                                                                         |
| Quality of data                                                                                                                                                                                                                                                  | <input type="checkbox"/> Standard recording of raw data<br><input type="checkbox"/> Free recording of raw data<br><input type="checkbox"/> Anecdotic                                                                                                        |
| Analysis                                                                                                                                                                                                                                                         | <input type="checkbox"/> Reported, verifiable methodology<br><input type="checkbox"/> Reported, unverifiable methodology<br><input type="checkbox"/> Unknown, unverifiable methodology                                                                      |
| Quality of analysis                                                                                                                                                                                                                                              | <input type="checkbox"/> Scientifically based<br><input type="checkbox"/> Indicative only<br><input type="checkbox"/> Unknown                                                                                                                               |
| <b>REPORTING</b>                                                                                                                                                                                                                                                 |                                                                                                                                                                                                                                                             |
| Language                                                                                                                                                                                                                                                         | Specify reporting language(s):                                                                                                                                                                                                                              |
| Availability                                                                                                                                                                                                                                                     | <input type="checkbox"/> Scientific publication<br><input type="checkbox"/> Official report available on the internet or in other public forum<br><input type="checkbox"/> Official report available from network<br><input type="checkbox"/> Not available |
| Frequency                                                                                                                                                                                                                                                        | <input type="checkbox"/> ≥ 1 time/year –<br><input type="checkbox"/> < 1 time/year –                                                                                                                                                                        |
| Historical reference                                                                                                                                                                                                                                             | <input type="checkbox"/> over ≥ 5 years<br><input type="checkbox"/> between 1 and 5 years<br><input type="checkbox"/> no historical analysis                                                                                                                |
| <b>COMMENT(S)</b>                                                                                                                                                                                                                                                |                                                                                                                                                                                                                                                             |
| Four independent certification bodies certify farms against a nationally agreed standard of good agricultural practice (food safety and hygiene, animal welfare and environmental protection). No data on inspection results available. No reporting on website. |                                                                                                                                                                                                                                                             |

## GSEN-09-0165.00.1 GB – LEAF

| EuropaBio's coordinated approach to General Surveillance: Existing Networks |                                                                                                                                                                                                                                                                                                                                                                                      |                                                                                                                                                                                                                                                                                                                                                                                                                                                                                                                              |                                                                                                                                                                                                                                                                                              |
|-----------------------------------------------------------------------------|--------------------------------------------------------------------------------------------------------------------------------------------------------------------------------------------------------------------------------------------------------------------------------------------------------------------------------------------------------------------------------------|------------------------------------------------------------------------------------------------------------------------------------------------------------------------------------------------------------------------------------------------------------------------------------------------------------------------------------------------------------------------------------------------------------------------------------------------------------------------------------------------------------------------------|----------------------------------------------------------------------------------------------------------------------------------------------------------------------------------------------------------------------------------------------------------------------------------------------|
| <b>ORGANISATION</b>                                                         |                                                                                                                                                                                                                                                                                                                                                                                      |                                                                                                                                                                                                                                                                                                                                                                                                                                                                                                                              |                                                                                                                                                                                                                                                                                              |
| EuropaBio reference                                                         | GS-EN-09-0165                                                                                                                                                                                                                                                                                                                                                                        |                                                                                                                                                                                                                                                                                                                                                                                                                                                                                                                              |                                                                                                                                                                                                                                                                                              |
| Official name of the Network                                                | <b>Linking Environment And Farming</b><br>subsidiary of Assured Food Standards (AFS)                                                                                                                                                                                                                                                                                                 |                                                                                                                                                                                                                                                                                                                                                                                                                                                                                                                              |                                                                                                                                                                                                                                                                                              |
| Other names                                                                 | LEAF                                                                                                                                                                                                                                                                                                                                                                                 |                                                                                                                                                                                                                                                                                                                                                                                                                                                                                                                              |                                                                                                                                                                                                                                                                                              |
| Type of organisation                                                        | Professional<br>Founded 1991                                                                                                                                                                                                                                                                                                                                                         |                                                                                                                                                                                                                                                                                                                                                                                                                                                                                                                              |                                                                                                                                                                                                                                                                                              |
| Coordinates                                                                 | The National Agricultural Centre<br>Stoneleigh Park<br>Warwickshire<br>CV8 2LG<br><br>Fax: 0247 6413 636<br>Email: enquiries[at]leafuk.org                                                                                                                                                                                                                                           |                                                                                                                                                                                                                                                                                                                                                                                                                                                                                                                              |                                                                                                                                                                                                                                                                                              |
| Website                                                                     | <a href="http://www.leafuk.org/leafuk/">http://www.leafuk.org/leafuk/</a>                                                                                                                                                                                                                                                                                                            |                                                                                                                                                                                                                                                                                                                                                                                                                                                                                                                              |                                                                                                                                                                                                                                                                                              |
| Funding                                                                     | Members, sponsors                                                                                                                                                                                                                                                                                                                                                                    |                                                                                                                                                                                                                                                                                                                                                                                                                                                                                                                              |                                                                                                                                                                                                                                                                                              |
| Conflict of interest                                                        | -                                                                                                                                                                                                                                                                                                                                                                                    |                                                                                                                                                                                                                                                                                                                                                                                                                                                                                                                              |                                                                                                                                                                                                                                                                                              |
| Part of other network(s)                                                    | -                                                                                                                                                                                                                                                                                                                                                                                    |                                                                                                                                                                                                                                                                                                                                                                                                                                                                                                                              |                                                                                                                                                                                                                                                                                              |
| Grouping other network(s)                                                   | -                                                                                                                                                                                                                                                                                                                                                                                    |                                                                                                                                                                                                                                                                                                                                                                                                                                                                                                                              |                                                                                                                                                                                                                                                                                              |
| <b>MONITORING SUBJECT</b>                                                   |                                                                                                                                                                                                                                                                                                                                                                                      |                                                                                                                                                                                                                                                                                                                                                                                                                                                                                                                              |                                                                                                                                                                                                                                                                                              |
| Description                                                                 | Best practice management (to develop and promote Integrated Farm Management); record-keeping & audit of on-farm standards; certification for Leaf Marque (standards, traceability and sustainability)                                                                                                                                                                                |                                                                                                                                                                                                                                                                                                                                                                                                                                                                                                                              |                                                                                                                                                                                                                                                                                              |
| Protection goal(s) and/or influencing factor(s)                             | <input checked="" type="checkbox"/> Protection goal<br><input type="checkbox"/> Biodiversity: general<br><input type="checkbox"/> Human Health<br><input type="checkbox"/> Animal Health<br><input type="checkbox"/> Plant Health<br><input type="checkbox"/> Soil function<br><input type="checkbox"/> Water quality<br><input checked="" type="checkbox"/> Sustainable Agriculture | <input checked="" type="checkbox"/> Influencing factor<br><input checked="" type="checkbox"/> Agronomic practice<br><input type="checkbox"/> Plant protection<br><input type="checkbox"/> GMO cultivation<br><input type="checkbox"/> Environmental conditions                                                                                                                                                                                                                                                               |                                                                                                                                                                                                                                                                                              |
| Duplication of Farmer's questionnaire                                       | <input type="checkbox"/> No duplication<br><input checked="" type="checkbox"/> Partly duplication<br><input type="checkbox"/> Complete duplication                                                                                                                                                                                                                                   |                                                                                                                                                                                                                                                                                                                                                                                                                                                                                                                              |                                                                                                                                                                                                                                                                                              |
| <b>SPECIFICITY</b>                                                          |                                                                                                                                                                                                                                                                                                                                                                                      |                                                                                                                                                                                                                                                                                                                                                                                                                                                                                                                              |                                                                                                                                                                                                                                                                                              |
| Geography                                                                   | <input type="checkbox"/> EU -wide<br><input type="checkbox"/> Zone A – North<br><input checked="" type="checkbox"/> Zone B – Centre:<br><input type="checkbox"/> Zone C – South                                                                                                                                                                                                      |                                                                                                                                                                                                                                                                                                                                                                                                                                                                                                                              |                                                                                                                                                                                                                                                                                              |
|                                                                             | <input type="checkbox"/> Denmark,<br><input type="checkbox"/> Estonia,<br><input type="checkbox"/> Latvia,<br><input type="checkbox"/> Lithuania,<br><input type="checkbox"/> Finland,<br><input type="checkbox"/> Sweden                                                                                                                                                            | <input type="checkbox"/> Belgium,<br><input type="checkbox"/> Czech Republic<br><input type="checkbox"/> Germany,<br><input type="checkbox"/> Ireland,<br><input type="checkbox"/> Luxembourg,<br><input type="checkbox"/> Hungary,<br><input type="checkbox"/> Netherlands,<br><input type="checkbox"/> Austria,<br><input type="checkbox"/> Poland,<br><input type="checkbox"/> Romania,<br><input type="checkbox"/> Slovenia,<br><input type="checkbox"/> Slovakia,<br><input checked="" type="checkbox"/> United Kingdom | <input type="checkbox"/> Bulgaria,<br><input type="checkbox"/> Greece,<br><input type="checkbox"/> Spain,<br><input type="checkbox"/> France,<br><input type="checkbox"/> Italy,<br><input type="checkbox"/> Cyprus,<br><input type="checkbox"/> Malta,<br><input type="checkbox"/> Portugal |
|                                                                             | <input type="checkbox"/> Regional (specify)<br><input type="checkbox"/> Local (specify)                                                                                                                                                                                                                                                                                              |                                                                                                                                                                                                                                                                                                                                                                                                                                                                                                                              |                                                                                                                                                                                                                                                                                              |
| Factors                                                                     | <input checked="" type="checkbox"/> Multiple species/items (specify): agronomic practice<br><input type="checkbox"/> Single species/item (specify)                                                                                                                                                                                                                                   |                                                                                                                                                                                                                                                                                                                                                                                                                                                                                                                              |                                                                                                                                                                                                                                                                                              |
| Crop                                                                        | <input type="checkbox"/> No specific crop(s)<br><input checked="" type="checkbox"/> Several crops (e.g. all cereals):<br><input type="checkbox"/> Single crop                                                                                                                                                                                                                        |                                                                                                                                                                                                                                                                                                                                                                                                                                                                                                                              |                                                                                                                                                                                                                                                                                              |
| Trait /treatment                                                            | <input type="checkbox"/> No specific traits/treatments<br><input type="checkbox"/> Several traits/treatments: Integrated Farm Management<br><input type="checkbox"/> Single trait/treatment                                                                                                                                                                                          |                                                                                                                                                                                                                                                                                                                                                                                                                                                                                                                              |                                                                                                                                                                                                                                                                                              |

|                                                                                                                                                                 |                                                                                                                                                                                                                                                             |
|-----------------------------------------------------------------------------------------------------------------------------------------------------------------|-------------------------------------------------------------------------------------------------------------------------------------------------------------------------------------------------------------------------------------------------------------|
| GMO                                                                                                                                                             | <input checked="" type="checkbox"/> No GMO bias<br><input type="checkbox"/> GMO specific                                                                                                                                                                    |
| <b>METHODOLOGY</b>                                                                                                                                              |                                                                                                                                                                                                                                                             |
| Observations                                                                                                                                                    | <input type="checkbox"/> Reported, verifiable methodology<br><input type="checkbox"/> Reported, unverifiable methodology<br><input type="checkbox"/> Unknown, unverifiable methodology                                                                      |
| Frequency                                                                                                                                                       | <input type="checkbox"/> > 1 time/year<br><input checked="" type="checkbox"/> 1 time/year:<br><input type="checkbox"/> < 1 time/year                                                                                                                        |
| Future                                                                                                                                                          | <input checked="" type="checkbox"/> For ≥ 5 years<br><input type="checkbox"/> between 1 and 5 years<br><input type="checkbox"/> no prospect                                                                                                                 |
| Quality of performers                                                                                                                                           | <input checked="" type="checkbox"/> Trained, professionals<br><input type="checkbox"/> Trained, non-professionals – farmers<br><input type="checkbox"/> Uncertain or not -specified                                                                         |
| Quality of data                                                                                                                                                 | <input type="checkbox"/> Standard recording of raw data<br><input type="checkbox"/> Free recording of raw data<br><input type="checkbox"/> Anecdotic                                                                                                        |
| Analysis                                                                                                                                                        | <input type="checkbox"/> Reported, verifiable methodology<br><input type="checkbox"/> Reported, unverifiable methodology<br><input type="checkbox"/> Unknown, unverifiable methodology                                                                      |
| Quality of analysis                                                                                                                                             | <input type="checkbox"/> Scientifically based<br><input type="checkbox"/> Indicative only<br><input type="checkbox"/> Unknown                                                                                                                               |
| <b>REPORTING</b>                                                                                                                                                |                                                                                                                                                                                                                                                             |
| Language                                                                                                                                                        | <input type="checkbox"/> Specify reporting language(s):                                                                                                                                                                                                     |
| Availability                                                                                                                                                    | <input type="checkbox"/> Scientific publication<br><input type="checkbox"/> Official report available on the internet or in other public forum<br><input type="checkbox"/> Official report available from network<br><input type="checkbox"/> Not available |
| Frequency                                                                                                                                                       | <input type="checkbox"/> ≥ 1 time/year –<br><input type="checkbox"/> < 1 time/year –                                                                                                                                                                        |
| Historical reference                                                                                                                                            | <input type="checkbox"/> over ≥ 5 years<br><input type="checkbox"/> between 1 and 5 years<br><input type="checkbox"/> no historical analysis                                                                                                                |
| <b>COMMENT(S)</b>                                                                                                                                               |                                                                                                                                                                                                                                                             |
| Self-audit by farmers, certification for the Leaf Marque . No data on inspection results available on the website. Information on methodology only for members. |                                                                                                                                                                                                                                                             |

**GSEN-09-0166.00.2 GB – FERA**

| <b>EuropaBio's coordinated approach to General Surveillance: Existing Networks</b> |                                                                                                                                                                                                                                                                                                           |                                                                                                                                                                                                                                                                                                                                                                                                                                                                                                                              |                                                                                                                                                                                                                                                                                              |
|------------------------------------------------------------------------------------|-----------------------------------------------------------------------------------------------------------------------------------------------------------------------------------------------------------------------------------------------------------------------------------------------------------|------------------------------------------------------------------------------------------------------------------------------------------------------------------------------------------------------------------------------------------------------------------------------------------------------------------------------------------------------------------------------------------------------------------------------------------------------------------------------------------------------------------------------|----------------------------------------------------------------------------------------------------------------------------------------------------------------------------------------------------------------------------------------------------------------------------------------------|
| <b>ORGANISATION</b>                                                                |                                                                                                                                                                                                                                                                                                           |                                                                                                                                                                                                                                                                                                                                                                                                                                                                                                                              |                                                                                                                                                                                                                                                                                              |
| EuropaBio reference                                                                | GS-EN-09-0166                                                                                                                                                                                                                                                                                             |                                                                                                                                                                                                                                                                                                                                                                                                                                                                                                                              |                                                                                                                                                                                                                                                                                              |
| Official name of the Network                                                       | <b>The Food and Environment Research Agency</b><br>Formerly: Central Science Laboratory                                                                                                                                                                                                                   |                                                                                                                                                                                                                                                                                                                                                                                                                                                                                                                              |                                                                                                                                                                                                                                                                                              |
| Other names                                                                        | <b>FERA</b><br>(CSL); Pesticide usage survey                                                                                                                                                                                                                                                              |                                                                                                                                                                                                                                                                                                                                                                                                                                                                                                                              |                                                                                                                                                                                                                                                                                              |
| Type of organisation                                                               | Governmental<br>Founded (unknown)                                                                                                                                                                                                                                                                         |                                                                                                                                                                                                                                                                                                                                                                                                                                                                                                                              |                                                                                                                                                                                                                                                                                              |
| Coordinates                                                                        | The Food and Environment Research Agency<br>Sand Hutton<br>York<br>YO41 1LZ<br><br>Fax: +44 (0)1904 462111<br>Email: info[at]fera.gsi.gov.uk                                                                                                                                                              |                                                                                                                                                                                                                                                                                                                                                                                                                                                                                                                              |                                                                                                                                                                                                                                                                                              |
| Website                                                                            | <a href="http://www.fera.defra.gov.uk/">http://www.fera.defra.gov.uk/</a><br><a href="http://www.fera.defra.gov.uk/plants/pesticideUsage/index.cfm">http://www.fera.defra.gov.uk/plants/pesticideUsage/index.cfm</a>                                                                                      |                                                                                                                                                                                                                                                                                                                                                                                                                                                                                                                              |                                                                                                                                                                                                                                                                                              |
| Funding                                                                            |                                                                                                                                                                                                                                                                                                           |                                                                                                                                                                                                                                                                                                                                                                                                                                                                                                                              |                                                                                                                                                                                                                                                                                              |
| Conflict of interest                                                               | -                                                                                                                                                                                                                                                                                                         |                                                                                                                                                                                                                                                                                                                                                                                                                                                                                                                              |                                                                                                                                                                                                                                                                                              |
| Part of other network(s)                                                           |                                                                                                                                                                                                                                                                                                           |                                                                                                                                                                                                                                                                                                                                                                                                                                                                                                                              |                                                                                                                                                                                                                                                                                              |
| Grouping other network(s)                                                          | executive agency of Defra                                                                                                                                                                                                                                                                                 |                                                                                                                                                                                                                                                                                                                                                                                                                                                                                                                              |                                                                                                                                                                                                                                                                                              |
| <b>MONITORING SUBJECT</b>                                                          |                                                                                                                                                                                                                                                                                                           |                                                                                                                                                                                                                                                                                                                                                                                                                                                                                                                              |                                                                                                                                                                                                                                                                                              |
| Description                                                                        | Pesticide usage survey (PUS) team to gather the data, produce guidelines and create powerful, accessible databases for industry.                                                                                                                                                                          |                                                                                                                                                                                                                                                                                                                                                                                                                                                                                                                              |                                                                                                                                                                                                                                                                                              |
| Protection goal(s) and/or influencing factor(s)                                    | <input type="checkbox"/> Protection goal                                                                                                                                                                                                                                                                  | <input checked="" type="checkbox"/> Influencing factor                                                                                                                                                                                                                                                                                                                                                                                                                                                                       |                                                                                                                                                                                                                                                                                              |
|                                                                                    | <input type="checkbox"/> Biodiversity<br><input type="checkbox"/> Human Health<br><input type="checkbox"/> Animal Health<br><input type="checkbox"/> Plant Health<br><input type="checkbox"/> Soil function<br><input type="checkbox"/> Water quality<br><input type="checkbox"/> Sustainable Agriculture | <input type="checkbox"/> Agronomic practice<br><input checked="" type="checkbox"/> Plant protection<br><input type="checkbox"/> GMO cultivation<br><input type="checkbox"/> Environmental conditions                                                                                                                                                                                                                                                                                                                         |                                                                                                                                                                                                                                                                                              |
| Duplication of Farmer's questionnaire                                              | <input type="checkbox"/> No duplication<br><input checked="" type="checkbox"/> Partly duplication<br><input type="checkbox"/> Complete duplication                                                                                                                                                        |                                                                                                                                                                                                                                                                                                                                                                                                                                                                                                                              |                                                                                                                                                                                                                                                                                              |
| <b>SPECIFICITY</b>                                                                 |                                                                                                                                                                                                                                                                                                           |                                                                                                                                                                                                                                                                                                                                                                                                                                                                                                                              |                                                                                                                                                                                                                                                                                              |
| Geography                                                                          | <input type="checkbox"/> EU -wide                                                                                                                                                                                                                                                                         |                                                                                                                                                                                                                                                                                                                                                                                                                                                                                                                              |                                                                                                                                                                                                                                                                                              |
|                                                                                    | <input type="checkbox"/> Zone A – North                                                                                                                                                                                                                                                                   | <input checked="" type="checkbox"/> Zone B – Centre:                                                                                                                                                                                                                                                                                                                                                                                                                                                                         | <input type="checkbox"/> Zone C – South                                                                                                                                                                                                                                                      |
|                                                                                    | <input type="checkbox"/> Denmark,<br><input type="checkbox"/> Estonia,<br><input type="checkbox"/> Latvia,<br><input type="checkbox"/> Lithuania,<br><input type="checkbox"/> Finland,<br><input type="checkbox"/> Sweden                                                                                 | <input type="checkbox"/> Belgium,<br><input type="checkbox"/> Czech Republic<br><input type="checkbox"/> Germany,<br><input type="checkbox"/> Ireland,<br><input type="checkbox"/> Luxembourg,<br><input type="checkbox"/> Hungary,<br><input type="checkbox"/> Netherlands,<br><input type="checkbox"/> Austria,<br><input type="checkbox"/> Poland,<br><input type="checkbox"/> Romania,<br><input type="checkbox"/> Slovenia,<br><input type="checkbox"/> Slovakia,<br><input checked="" type="checkbox"/> United Kingdom | <input type="checkbox"/> Bulgaria,<br><input type="checkbox"/> Greece,<br><input type="checkbox"/> Spain,<br><input type="checkbox"/> France,<br><input type="checkbox"/> Italy,<br><input type="checkbox"/> Cyprus,<br><input type="checkbox"/> Malta,<br><input type="checkbox"/> Portugal |
|                                                                                    | <input type="checkbox"/> Regional (specify)<br><input type="checkbox"/> Local (specify)                                                                                                                                                                                                                   |                                                                                                                                                                                                                                                                                                                                                                                                                                                                                                                              |                                                                                                                                                                                                                                                                                              |
| Factors                                                                            | <input checked="" type="checkbox"/> Multiple species/items (specify): use of plant protection products<br><input type="checkbox"/> Single species/item (specify)                                                                                                                                          |                                                                                                                                                                                                                                                                                                                                                                                                                                                                                                                              |                                                                                                                                                                                                                                                                                              |
| Crop                                                                               | <input type="checkbox"/> No specific crop(s)<br><input checked="" type="checkbox"/> Several crops (e.g. all cereals)<br><input type="checkbox"/> Single crop                                                                                                                                              |                                                                                                                                                                                                                                                                                                                                                                                                                                                                                                                              |                                                                                                                                                                                                                                                                                              |
| Trait /treatment                                                                   | <input checked="" type="checkbox"/> No specific traits/treatments<br><input type="checkbox"/> Several traits/treatments<br><input type="checkbox"/> Single trait/treatment                                                                                                                                |                                                                                                                                                                                                                                                                                                                                                                                                                                                                                                                              |                                                                                                                                                                                                                                                                                              |

|                                                                                                                  |                                                                                                                                                                                                                                                                        |
|------------------------------------------------------------------------------------------------------------------|------------------------------------------------------------------------------------------------------------------------------------------------------------------------------------------------------------------------------------------------------------------------|
| GMO                                                                                                              | <input checked="" type="checkbox"/> No GMO bias<br><input type="checkbox"/> GMO specific                                                                                                                                                                               |
| <b>METHODOLOGY</b>                                                                                               |                                                                                                                                                                                                                                                                        |
| Observations                                                                                                     | <input checked="" type="checkbox"/> Reported, verifiable methodology<br><input type="checkbox"/> Reported, unverifiable methodology<br><input type="checkbox"/> Unknown, unverifiable methodology                                                                      |
| Frequency                                                                                                        | <input type="checkbox"/> > 1 time/year<br><input type="checkbox"/> 1 time/year<br><input checked="" type="checkbox"/> < 1 time/year                                                                                                                                    |
| Future                                                                                                           | <input checked="" type="checkbox"/> For $\geq 5$ years<br><input type="checkbox"/> between 1 and 5 years<br><input type="checkbox"/> no prospect                                                                                                                       |
| Quality of performers                                                                                            | <input checked="" type="checkbox"/> Trained, professionals<br><input type="checkbox"/> Trained, non-professionals – training by documentation, volunteers<br><input type="checkbox"/> Uncertain or not -specified                                                      |
| Quality of data                                                                                                  | <input checked="" type="checkbox"/> Standard recording of raw data<br><input type="checkbox"/> Free recording of raw data<br><input type="checkbox"/> Anecdotal                                                                                                        |
| Analysis                                                                                                         | <input checked="" type="checkbox"/> Reported, verifiable methodology<br><input type="checkbox"/> Reported, unverifiable methodology<br><input type="checkbox"/> Unknown, unverifiable methodology                                                                      |
| Quality of analysis                                                                                              | <input checked="" type="checkbox"/> Scientifically based<br><input type="checkbox"/> Indicative only<br><input type="checkbox"/> Unknown                                                                                                                               |
| <b>REPORTING</b>                                                                                                 |                                                                                                                                                                                                                                                                        |
| Language                                                                                                         | Specify reporting language(s): English                                                                                                                                                                                                                                 |
| Availability                                                                                                     | <input type="checkbox"/> Scientific publication<br><input checked="" type="checkbox"/> Official report available on the internet or in other public forum<br><input type="checkbox"/> Official report available from network<br><input type="checkbox"/> Not available |
| Frequency                                                                                                        | <input checked="" type="checkbox"/> $\geq 1$ time/year<br><input checked="" type="checkbox"/> < 1 time/year                                                                                                                                                            |
| Historical reference                                                                                             | <input checked="" type="checkbox"/> over $\geq 5$ years<br><input type="checkbox"/> between 1 and 5 years<br><input type="checkbox"/> no historical analysis                                                                                                           |
| <b>COMMENT(S)</b>                                                                                                |                                                                                                                                                                                                                                                                        |
| Information on use of PPP nationwide. Part of EUROSTAT. Information on pesticide use for the country as a whole. |                                                                                                                                                                                                                                                                        |

## GSEN-09-0167.00.1 GB – HSE

| EuropaBio's coordinated approach to General Surveillance: Existing Networks |                                                                                                                                                                                                                                                                                                                      |                                                                                                                                                                                                                                                                                                                                                                                                                                                                                                                              |                                                                                                                                                                                                                                                                                              |
|-----------------------------------------------------------------------------|----------------------------------------------------------------------------------------------------------------------------------------------------------------------------------------------------------------------------------------------------------------------------------------------------------------------|------------------------------------------------------------------------------------------------------------------------------------------------------------------------------------------------------------------------------------------------------------------------------------------------------------------------------------------------------------------------------------------------------------------------------------------------------------------------------------------------------------------------------|----------------------------------------------------------------------------------------------------------------------------------------------------------------------------------------------------------------------------------------------------------------------------------------------|
| <b>ORGANISATION</b>                                                         |                                                                                                                                                                                                                                                                                                                      |                                                                                                                                                                                                                                                                                                                                                                                                                                                                                                                              |                                                                                                                                                                                                                                                                                              |
| EuropaBio reference                                                         | GS-EN-09-0167                                                                                                                                                                                                                                                                                                        |                                                                                                                                                                                                                                                                                                                                                                                                                                                                                                                              |                                                                                                                                                                                                                                                                                              |
| Official name of the Network                                                | <b>Health &amp; Safety Executive</b><br>Chemicals Regulation Directorate                                                                                                                                                                                                                                             |                                                                                                                                                                                                                                                                                                                                                                                                                                                                                                                              |                                                                                                                                                                                                                                                                                              |
| Other names                                                                 | Health and Safety Executive (HSE) / Chemicals Regulation Directorate (CRD): Pesticide Use / Health & Safety                                                                                                                                                                                                          |                                                                                                                                                                                                                                                                                                                                                                                                                                                                                                                              |                                                                                                                                                                                                                                                                                              |
| Type of organisation                                                        | Governmental<br>Founded (unknown)                                                                                                                                                                                                                                                                                    |                                                                                                                                                                                                                                                                                                                                                                                                                                                                                                                              |                                                                                                                                                                                                                                                                                              |
| Coordinates                                                                 | HSE head office<br>Health and Safety Executive<br>(1G) Redgrave Court<br>Merton Road<br>Bootle<br>Merseyside<br>L20 7HS<br><br>Fax: 0845 408 9566<br>Email: hse.infoline[at]connaught.plc.uk                                                                                                                         |                                                                                                                                                                                                                                                                                                                                                                                                                                                                                                                              |                                                                                                                                                                                                                                                                                              |
| Website                                                                     | <a href="http://www.hse.gov.uk/">http://www.hse.gov.uk/</a><br><a href="http://www.hse.gov.uk/agriculture/topics/pesticides.htm">http://www.hse.gov.uk/agriculture/topics/pesticides.htm</a>                                                                                                                         |                                                                                                                                                                                                                                                                                                                                                                                                                                                                                                                              |                                                                                                                                                                                                                                                                                              |
| Funding                                                                     | public                                                                                                                                                                                                                                                                                                               |                                                                                                                                                                                                                                                                                                                                                                                                                                                                                                                              |                                                                                                                                                                                                                                                                                              |
| Conflict of interest                                                        | -                                                                                                                                                                                                                                                                                                                    |                                                                                                                                                                                                                                                                                                                                                                                                                                                                                                                              |                                                                                                                                                                                                                                                                                              |
| Part of other network(s)                                                    |                                                                                                                                                                                                                                                                                                                      |                                                                                                                                                                                                                                                                                                                                                                                                                                                                                                                              |                                                                                                                                                                                                                                                                                              |
| Grouping other network(s)                                                   |                                                                                                                                                                                                                                                                                                                      |                                                                                                                                                                                                                                                                                                                                                                                                                                                                                                                              |                                                                                                                                                                                                                                                                                              |
| <b>MONITORING SUBJECT</b>                                                   |                                                                                                                                                                                                                                                                                                                      |                                                                                                                                                                                                                                                                                                                                                                                                                                                                                                                              |                                                                                                                                                                                                                                                                                              |
| Description                                                                 | Human health: safe use of pesticides.                                                                                                                                                                                                                                                                                |                                                                                                                                                                                                                                                                                                                                                                                                                                                                                                                              |                                                                                                                                                                                                                                                                                              |
| Protection goal(s) and/or influencing factor(s)                             | <input checked="" type="checkbox"/> Protection goal                                                                                                                                                                                                                                                                  | <input type="checkbox"/> Influencing factor                                                                                                                                                                                                                                                                                                                                                                                                                                                                                  |                                                                                                                                                                                                                                                                                              |
|                                                                             | <input type="checkbox"/> Biodiversity<br><input checked="" type="checkbox"/> Human Health<br><input type="checkbox"/> Animal Health<br><input type="checkbox"/> Plant Health<br><input type="checkbox"/> Soil function<br><input type="checkbox"/> Water quality<br><input type="checkbox"/> Sustainable Agriculture | <input type="checkbox"/> Agronomic practice<br><input type="checkbox"/> Plant protection<br><input type="checkbox"/> GMO cultivation<br><input type="checkbox"/> Environmental conditions                                                                                                                                                                                                                                                                                                                                    |                                                                                                                                                                                                                                                                                              |
| Duplication of Farmer's questionnaire                                       | <input checked="" type="checkbox"/> No duplication<br><input type="checkbox"/> Partly duplication<br><input type="checkbox"/> Complete duplication                                                                                                                                                                   |                                                                                                                                                                                                                                                                                                                                                                                                                                                                                                                              |                                                                                                                                                                                                                                                                                              |
| <b>SPECIFICITY</b>                                                          |                                                                                                                                                                                                                                                                                                                      |                                                                                                                                                                                                                                                                                                                                                                                                                                                                                                                              |                                                                                                                                                                                                                                                                                              |
| Geography                                                                   | <input type="checkbox"/> EU -wide                                                                                                                                                                                                                                                                                    |                                                                                                                                                                                                                                                                                                                                                                                                                                                                                                                              |                                                                                                                                                                                                                                                                                              |
|                                                                             | <input type="checkbox"/> Zone A – North                                                                                                                                                                                                                                                                              | <input checked="" type="checkbox"/> Zone B – Centre:                                                                                                                                                                                                                                                                                                                                                                                                                                                                         | <input type="checkbox"/> Zone C – South                                                                                                                                                                                                                                                      |
|                                                                             | <input type="checkbox"/> Denmark,<br><input type="checkbox"/> Estonia,<br><input type="checkbox"/> Latvia,<br><input type="checkbox"/> Lithuania,<br><input type="checkbox"/> Finland,<br><input type="checkbox"/> Sweden                                                                                            | <input type="checkbox"/> Belgium,<br><input type="checkbox"/> Czech Republic<br><input type="checkbox"/> Germany,<br><input type="checkbox"/> Ireland,<br><input type="checkbox"/> Luxembourg,<br><input type="checkbox"/> Hungary,<br><input type="checkbox"/> Netherlands,<br><input type="checkbox"/> Austria,<br><input type="checkbox"/> Poland,<br><input type="checkbox"/> Romania,<br><input type="checkbox"/> Slovenia,<br><input type="checkbox"/> Slovakia,<br><input checked="" type="checkbox"/> United Kingdom | <input type="checkbox"/> Bulgaria,<br><input type="checkbox"/> Greece,<br><input type="checkbox"/> Spain,<br><input type="checkbox"/> France,<br><input type="checkbox"/> Italy,<br><input type="checkbox"/> Cyprus,<br><input type="checkbox"/> Malta,<br><input type="checkbox"/> Portugal |
|                                                                             | <input type="checkbox"/> Regional (specify)<br><input type="checkbox"/> Local (specify)                                                                                                                                                                                                                              |                                                                                                                                                                                                                                                                                                                                                                                                                                                                                                                              |                                                                                                                                                                                                                                                                                              |
| Factors                                                                     | <input checked="" type="checkbox"/> Multiple species/items (specify): use of plant protection products<br><input type="checkbox"/> Single species/item (specify)                                                                                                                                                     |                                                                                                                                                                                                                                                                                                                                                                                                                                                                                                                              |                                                                                                                                                                                                                                                                                              |
| Crop                                                                        | <input type="checkbox"/> No specific crop(s)<br><input type="checkbox"/> Several crops (e.g. all cereals)<br><input type="checkbox"/> Single crop                                                                                                                                                                    |                                                                                                                                                                                                                                                                                                                                                                                                                                                                                                                              |                                                                                                                                                                                                                                                                                              |
| Trait /treatment                                                            | <input checked="" type="checkbox"/> No specific traits/treatments                                                                                                                                                                                                                                                    |                                                                                                                                                                                                                                                                                                                                                                                                                                                                                                                              |                                                                                                                                                                                                                                                                                              |

|                                                                                                                                                                                                                                                                                        |                                                                                                                                                                                                                                                                        |
|----------------------------------------------------------------------------------------------------------------------------------------------------------------------------------------------------------------------------------------------------------------------------------------|------------------------------------------------------------------------------------------------------------------------------------------------------------------------------------------------------------------------------------------------------------------------|
|                                                                                                                                                                                                                                                                                        | <input type="checkbox"/> Several traits/treatments<br><input type="checkbox"/> Single trait/treatment                                                                                                                                                                  |
| GMO                                                                                                                                                                                                                                                                                    | <input checked="" type="checkbox"/> No GMO bias<br><input type="checkbox"/> GMO specific                                                                                                                                                                               |
| <b>METHODOLOGY</b>                                                                                                                                                                                                                                                                     |                                                                                                                                                                                                                                                                        |
| Observations                                                                                                                                                                                                                                                                           | <input type="checkbox"/> Reported, verifiable methodology<br><input type="checkbox"/> Reported, unverifiable methodology<br><input type="checkbox"/> Unknown, unverifiable methodology                                                                                 |
| Frequency                                                                                                                                                                                                                                                                              | <input type="checkbox"/> > 1 time/year<br><input type="checkbox"/> 1 time/year<br><input type="checkbox"/> < 1 time/year                                                                                                                                               |
| Future                                                                                                                                                                                                                                                                                 | <input checked="" type="checkbox"/> For ≥ 5 years<br><input type="checkbox"/> between 1 and 5 years<br><input type="checkbox"/> no prospect                                                                                                                            |
| Quality of performers                                                                                                                                                                                                                                                                  | <input checked="" type="checkbox"/> Trained, professionals<br><input type="checkbox"/> Trained, non-professionals – training by documentation, volunteers<br><input type="checkbox"/> Uncertain or not -specified                                                      |
| Quality of data                                                                                                                                                                                                                                                                        | <input type="checkbox"/> Standard recording of raw data<br><input type="checkbox"/> Free recording of raw data<br><input type="checkbox"/> Anecdotic                                                                                                                   |
| Analysis                                                                                                                                                                                                                                                                               | <input type="checkbox"/> Reported, verifiable methodology<br><input type="checkbox"/> Reported, unverifiable methodology<br><input type="checkbox"/> Unknown, unverifiable methodology                                                                                 |
| Quality of analysis                                                                                                                                                                                                                                                                    | <input type="checkbox"/> Scientifically based<br><input type="checkbox"/> Indicative only<br><input type="checkbox"/> Unknown                                                                                                                                          |
| <b>REPORTING</b>                                                                                                                                                                                                                                                                       |                                                                                                                                                                                                                                                                        |
| Language                                                                                                                                                                                                                                                                               | Specify reporting language(s): English                                                                                                                                                                                                                                 |
| Availability                                                                                                                                                                                                                                                                           | <input type="checkbox"/> Scientific publication<br><input checked="" type="checkbox"/> Official report available on the internet or in other public forum<br><input type="checkbox"/> Official report available from network<br><input type="checkbox"/> Not available |
| Frequency                                                                                                                                                                                                                                                                              | <input checked="" type="checkbox"/> ≥ 1 time/year<br><input type="checkbox"/> < 1 time/year                                                                                                                                                                            |
| Historical reference                                                                                                                                                                                                                                                                   | <input checked="" type="checkbox"/> over ≥ 5 years<br><input type="checkbox"/> between 1 and 5 years<br><input type="checkbox"/> no historical analysis                                                                                                                |
| <b>COMMENT(S)</b>                                                                                                                                                                                                                                                                      |                                                                                                                                                                                                                                                                        |
| Information on how to use pesticides safely (regulations, guidelines), incidence recording. Regulations, guidelines, annual incidence reports ( <a href="http://www.hse.gov.uk/agriculture/resources/pesticides.htm">http://www.hse.gov.uk/agriculture/resources/pesticides.htm</a> ). |                                                                                                                                                                                                                                                                        |

**GSEN-09-0170.00.1 GB – BCPC**

| <b>EuropaBio's coordinated approach to General Surveillance: Existing Networks</b> |                                                                                                                                                                                                                                                                                                                                                           |                                                                                                                                                                                                                                                                                                                                                                                                                                                                                                                              |                                                                                                                                                                                                                                                                                              |
|------------------------------------------------------------------------------------|-----------------------------------------------------------------------------------------------------------------------------------------------------------------------------------------------------------------------------------------------------------------------------------------------------------------------------------------------------------|------------------------------------------------------------------------------------------------------------------------------------------------------------------------------------------------------------------------------------------------------------------------------------------------------------------------------------------------------------------------------------------------------------------------------------------------------------------------------------------------------------------------------|----------------------------------------------------------------------------------------------------------------------------------------------------------------------------------------------------------------------------------------------------------------------------------------------|
| <b>ORGANISATION</b>                                                                |                                                                                                                                                                                                                                                                                                                                                           |                                                                                                                                                                                                                                                                                                                                                                                                                                                                                                                              |                                                                                                                                                                                                                                                                                              |
| EuropaBio reference                                                                | GS-EN-09-0170                                                                                                                                                                                                                                                                                                                                             |                                                                                                                                                                                                                                                                                                                                                                                                                                                                                                                              |                                                                                                                                                                                                                                                                                              |
| Official name of the Network                                                       | <b>British Crop Production Council</b>                                                                                                                                                                                                                                                                                                                    |                                                                                                                                                                                                                                                                                                                                                                                                                                                                                                                              |                                                                                                                                                                                                                                                                                              |
| Other names                                                                        | BCPC; Pest/ Weed Resistance management                                                                                                                                                                                                                                                                                                                    |                                                                                                                                                                                                                                                                                                                                                                                                                                                                                                                              |                                                                                                                                                                                                                                                                                              |
| Type of organisation                                                               | Professional                                                                                                                                                                                                                                                                                                                                              |                                                                                                                                                                                                                                                                                                                                                                                                                                                                                                                              |                                                                                                                                                                                                                                                                                              |
| Coordinates                                                                        | BCPC Manager<br>BCPC<br>7 Omni Business Centre<br>Omega Park<br>ALTON<br>Hampshire GU34 2QD<br><br>Fax: +44(0)1420 593 209<br>Email: md[at]bcpc.org                                                                                                                                                                                                       |                                                                                                                                                                                                                                                                                                                                                                                                                                                                                                                              |                                                                                                                                                                                                                                                                                              |
| Website                                                                            | <a href="http://www.bcpc.org/">http://www.bcpc.org/</a>                                                                                                                                                                                                                                                                                                   |                                                                                                                                                                                                                                                                                                                                                                                                                                                                                                                              |                                                                                                                                                                                                                                                                                              |
| Funding                                                                            |                                                                                                                                                                                                                                                                                                                                                           |                                                                                                                                                                                                                                                                                                                                                                                                                                                                                                                              |                                                                                                                                                                                                                                                                                              |
| Conflict of interest                                                               | -                                                                                                                                                                                                                                                                                                                                                         |                                                                                                                                                                                                                                                                                                                                                                                                                                                                                                                              |                                                                                                                                                                                                                                                                                              |
| Part of other network(s)                                                           |                                                                                                                                                                                                                                                                                                                                                           |                                                                                                                                                                                                                                                                                                                                                                                                                                                                                                                              |                                                                                                                                                                                                                                                                                              |
| Grouping other network(s)                                                          | 20 member associations                                                                                                                                                                                                                                                                                                                                    |                                                                                                                                                                                                                                                                                                                                                                                                                                                                                                                              |                                                                                                                                                                                                                                                                                              |
| <b>MONITORING SUBJECT</b>                                                          |                                                                                                                                                                                                                                                                                                                                                           |                                                                                                                                                                                                                                                                                                                                                                                                                                                                                                                              |                                                                                                                                                                                                                                                                                              |
| Description                                                                        | promotes the use of good science and technology in the understanding and application of effective and sustainable crop production.<br>Monitoring, feedback & collation of resistance issues & advice on practical management.                                                                                                                             |                                                                                                                                                                                                                                                                                                                                                                                                                                                                                                                              |                                                                                                                                                                                                                                                                                              |
| Protection goal(s) and/or influencing factor(s)                                    | <input type="checkbox"/> Protection goal<br><br><input type="checkbox"/> Biodiversity<br><input type="checkbox"/> Human Health<br><input type="checkbox"/> Animal Health<br><input type="checkbox"/> Plant Health<br><input type="checkbox"/> Soil function<br><input type="checkbox"/> Water quality<br><input type="checkbox"/> Sustainable Agriculture | <input type="checkbox"/> Influencing factor<br><br><input checked="" type="checkbox"/> Agronomic practice<br><input checked="" type="checkbox"/> Plant protection<br><input type="checkbox"/> GMO cultivation<br><input type="checkbox"/> Environmental conditions                                                                                                                                                                                                                                                           |                                                                                                                                                                                                                                                                                              |
| Duplication of Farmer's questionnaire                                              | <input checked="" type="checkbox"/> No duplication<br><input type="checkbox"/> Partly duplication<br><input type="checkbox"/> Complete duplication                                                                                                                                                                                                        |                                                                                                                                                                                                                                                                                                                                                                                                                                                                                                                              |                                                                                                                                                                                                                                                                                              |
| <b>SPECIFICITY</b>                                                                 |                                                                                                                                                                                                                                                                                                                                                           |                                                                                                                                                                                                                                                                                                                                                                                                                                                                                                                              |                                                                                                                                                                                                                                                                                              |
| Geography                                                                          | <input type="checkbox"/> EU -wide                                                                                                                                                                                                                                                                                                                         |                                                                                                                                                                                                                                                                                                                                                                                                                                                                                                                              |                                                                                                                                                                                                                                                                                              |
|                                                                                    | <input type="checkbox"/> Zone A – North                                                                                                                                                                                                                                                                                                                   | <input checked="" type="checkbox"/> Zone B – Centre:                                                                                                                                                                                                                                                                                                                                                                                                                                                                         | <input type="checkbox"/> Zone C – South                                                                                                                                                                                                                                                      |
|                                                                                    | <input type="checkbox"/> Denmark,<br><input type="checkbox"/> Estonia,<br><input type="checkbox"/> Latvia,<br><input type="checkbox"/> Lithuania,<br><input type="checkbox"/> Finland,<br><input type="checkbox"/> Sweden                                                                                                                                 | <input type="checkbox"/> Belgium,<br><input type="checkbox"/> Czech Republic<br><input type="checkbox"/> Germany,<br><input type="checkbox"/> Ireland,<br><input type="checkbox"/> Luxembourg,<br><input type="checkbox"/> Hungary,<br><input type="checkbox"/> Netherlands,<br><input type="checkbox"/> Austria,<br><input type="checkbox"/> Poland,<br><input type="checkbox"/> Romania,<br><input type="checkbox"/> Slovenia,<br><input type="checkbox"/> Slovakia,<br><input checked="" type="checkbox"/> United Kingdom | <input type="checkbox"/> Bulgaria,<br><input type="checkbox"/> Greece,<br><input type="checkbox"/> Spain,<br><input type="checkbox"/> France,<br><input type="checkbox"/> Italy,<br><input type="checkbox"/> Cyprus,<br><input type="checkbox"/> Malta,<br><input type="checkbox"/> Portugal |
|                                                                                    | <input type="checkbox"/> Regional (specify)<br><input type="checkbox"/> Local (specify)                                                                                                                                                                                                                                                                   |                                                                                                                                                                                                                                                                                                                                                                                                                                                                                                                              |                                                                                                                                                                                                                                                                                              |
| Factors                                                                            | <input checked="" type="checkbox"/> Multiple species/items (specify): crop protection / agricultural practices<br><input type="checkbox"/> Single species/item (specify)                                                                                                                                                                                  |                                                                                                                                                                                                                                                                                                                                                                                                                                                                                                                              |                                                                                                                                                                                                                                                                                              |
| Crop                                                                               | <input type="checkbox"/> No specific crop(s)<br><input checked="" type="checkbox"/> Several crops (e.g. all cereals)<br><input type="checkbox"/> Single crop                                                                                                                                                                                              |                                                                                                                                                                                                                                                                                                                                                                                                                                                                                                                              |                                                                                                                                                                                                                                                                                              |
| Trait /treatment                                                                   | <input checked="" type="checkbox"/> No specific traits/treatments<br><input type="checkbox"/> Several traits/treatments<br><input type="checkbox"/> Single trait/treatment                                                                                                                                                                                |                                                                                                                                                                                                                                                                                                                                                                                                                                                                                                                              |                                                                                                                                                                                                                                                                                              |



|                                                                                                          |                                                                                                                                                                                                                                                                        |
|----------------------------------------------------------------------------------------------------------|------------------------------------------------------------------------------------------------------------------------------------------------------------------------------------------------------------------------------------------------------------------------|
| GMO                                                                                                      | <input checked="" type="checkbox"/> No GMO bias<br><input type="checkbox"/> GMO specific                                                                                                                                                                               |
| <b>METHODOLOGY</b>                                                                                       |                                                                                                                                                                                                                                                                        |
| Observations                                                                                             | <input type="checkbox"/> Reported, verifiable methodology<br><input type="checkbox"/> Reported, unverifiable methodology<br><input type="checkbox"/> Unknown, unverifiable methodology                                                                                 |
| Frequency                                                                                                | <input checked="" type="checkbox"/> > 1 time/year<br><input type="checkbox"/> 1 time/year<br><input type="checkbox"/> < 1 time/year                                                                                                                                    |
| Future                                                                                                   | <input checked="" type="checkbox"/> For ≥ 5 years<br><input type="checkbox"/> between 1 and 5 years<br><input type="checkbox"/> no prospect                                                                                                                            |
| Quality of performers                                                                                    | <input type="checkbox"/> Trained, professionals<br><input type="checkbox"/> Trained, non-professionals – training by documentation, volunteers<br><input type="checkbox"/> Uncertain or not -specified                                                                 |
| Quality of data                                                                                          | <input type="checkbox"/> Standard recording of raw data<br><input type="checkbox"/> Free recording of raw data<br><input type="checkbox"/> Anecdotic                                                                                                                   |
| Analysis                                                                                                 | <input type="checkbox"/> Reported, verifiable methodology<br><input type="checkbox"/> Reported, unverifiable methodology<br><input type="checkbox"/> Unknown, unverifiable methodology                                                                                 |
| Quality of analysis                                                                                      | <input type="checkbox"/> Scientifically based<br><input type="checkbox"/> Indicative only<br><input type="checkbox"/> Unknown                                                                                                                                          |
| <b>REPORTING</b>                                                                                         |                                                                                                                                                                                                                                                                        |
| Language                                                                                                 | Specify reporting language(s): English                                                                                                                                                                                                                                 |
| Availability                                                                                             | <input type="checkbox"/> Scientific publication<br><input checked="" type="checkbox"/> Official report available on the internet or in other public forum<br><input type="checkbox"/> Official report available from network<br><input type="checkbox"/> Not available |
| Frequency                                                                                                | <input checked="" type="checkbox"/> ≥ 1 time/year<br><input type="checkbox"/> < 1 time/year                                                                                                                                                                            |
| Historical reference                                                                                     | <input checked="" type="checkbox"/> over ≥ 5 years<br><input type="checkbox"/> between 1 and 5 years<br><input type="checkbox"/> no historical analysis                                                                                                                |
| <b>COMMENT(S)</b>                                                                                        |                                                                                                                                                                                                                                                                        |
| Overview of resistance issues & risk / management implications twice a year (not accessible on website). |                                                                                                                                                                                                                                                                        |

## GSEN-09-0171.00.1 GB – SCIMAC

| EuropaBio's coordinated approach to General Surveillance: Existing Networks |                                                                                                                                                                                                                                                                                                                                                                                                              |                                                                                                                                                                                                                                                                               |  |                                                                                                                                                                                                                                                                                                                                                                                                                                                                                                                                                                                      |                                                                                                                                                                                                                                                                                                                                         |
|-----------------------------------------------------------------------------|--------------------------------------------------------------------------------------------------------------------------------------------------------------------------------------------------------------------------------------------------------------------------------------------------------------------------------------------------------------------------------------------------------------|-------------------------------------------------------------------------------------------------------------------------------------------------------------------------------------------------------------------------------------------------------------------------------|--|--------------------------------------------------------------------------------------------------------------------------------------------------------------------------------------------------------------------------------------------------------------------------------------------------------------------------------------------------------------------------------------------------------------------------------------------------------------------------------------------------------------------------------------------------------------------------------------|-----------------------------------------------------------------------------------------------------------------------------------------------------------------------------------------------------------------------------------------------------------------------------------------------------------------------------------------|
| <b>ORGANISATION</b>                                                         |                                                                                                                                                                                                                                                                                                                                                                                                              |                                                                                                                                                                                                                                                                               |  |                                                                                                                                                                                                                                                                                                                                                                                                                                                                                                                                                                                      |                                                                                                                                                                                                                                                                                                                                         |
| EuropaBio reference                                                         | GS-EN-09-0171                                                                                                                                                                                                                                                                                                                                                                                                |                                                                                                                                                                                                                                                                               |  |                                                                                                                                                                                                                                                                                                                                                                                                                                                                                                                                                                                      |                                                                                                                                                                                                                                                                                                                                         |
| Official name of the Network                                                | Supply Chain Initiative on Modified Agricultural Crops                                                                                                                                                                                                                                                                                                                                                       |                                                                                                                                                                                                                                                                               |  |                                                                                                                                                                                                                                                                                                                                                                                                                                                                                                                                                                                      |                                                                                                                                                                                                                                                                                                                                         |
| Other names                                                                 | SCIMAC guidelines                                                                                                                                                                                                                                                                                                                                                                                            |                                                                                                                                                                                                                                                                               |  |                                                                                                                                                                                                                                                                                                                                                                                                                                                                                                                                                                                      |                                                                                                                                                                                                                                                                                                                                         |
| Type of organisation                                                        | Professional<br>Founded 1998                                                                                                                                                                                                                                                                                                                                                                                 |                                                                                                                                                                                                                                                                               |  |                                                                                                                                                                                                                                                                                                                                                                                                                                                                                                                                                                                      |                                                                                                                                                                                                                                                                                                                                         |
| Coordinates                                                                 | <a href="http://www.scimac.org.uk/contact.html">http://www.scimac.org.uk/contact.html</a>                                                                                                                                                                                                                                                                                                                    |                                                                                                                                                                                                                                                                               |  |                                                                                                                                                                                                                                                                                                                                                                                                                                                                                                                                                                                      |                                                                                                                                                                                                                                                                                                                                         |
| Website                                                                     | <a href="http://www.scimac.org.uk/">http://www.scimac.org.uk/</a>                                                                                                                                                                                                                                                                                                                                            |                                                                                                                                                                                                                                                                               |  |                                                                                                                                                                                                                                                                                                                                                                                                                                                                                                                                                                                      |                                                                                                                                                                                                                                                                                                                                         |
| Funding                                                                     | jointly funded by the Fertiliser Manufacturers' Association (FMA), the Department for Environment, Food and Rural Affairs (DEFRA) and the Scottish Executive Rural Affairs.                                                                                                                                                                                                                                  |                                                                                                                                                                                                                                                                               |  |                                                                                                                                                                                                                                                                                                                                                                                                                                                                                                                                                                                      |                                                                                                                                                                                                                                                                                                                                         |
| Conflict of interest                                                        | -                                                                                                                                                                                                                                                                                                                                                                                                            |                                                                                                                                                                                                                                                                               |  |                                                                                                                                                                                                                                                                                                                                                                                                                                                                                                                                                                                      |                                                                                                                                                                                                                                                                                                                                         |
| Part of other network(s)                                                    | Grouping of industry organisations along the UK farm supply chain, to support the carefully managed introduction of GM crops.                                                                                                                                                                                                                                                                                |                                                                                                                                                                                                                                                                               |  |                                                                                                                                                                                                                                                                                                                                                                                                                                                                                                                                                                                      |                                                                                                                                                                                                                                                                                                                                         |
| Grouping other network(s)                                                   | Member organisations:<br>British Society of Plant Breeders (BSPB)<br>National Farmers Union (NFU)<br>Crop Protection Association (CPA)<br>Agricultural Industries Confederation (AIC)                                                                                                                                                                                                                        |                                                                                                                                                                                                                                                                               |  |                                                                                                                                                                                                                                                                                                                                                                                                                                                                                                                                                                                      |                                                                                                                                                                                                                                                                                                                                         |
| <b>MONITORING SUBJECT</b>                                                   |                                                                                                                                                                                                                                                                                                                                                                                                              |                                                                                                                                                                                                                                                                               |  |                                                                                                                                                                                                                                                                                                                                                                                                                                                                                                                                                                                      |                                                                                                                                                                                                                                                                                                                                         |
| Description                                                                 | has developed practical, on-farm <b>guidelines</b> for managing GM crops as a proven basis for co-existence arrangements between GM and non-GM crops.                                                                                                                                                                                                                                                        |                                                                                                                                                                                                                                                                               |  |                                                                                                                                                                                                                                                                                                                                                                                                                                                                                                                                                                                      |                                                                                                                                                                                                                                                                                                                                         |
| Protection goal(s) and/or influencing factor(s)                             | <input type="checkbox"/> Protection goal<br><br><input type="checkbox"/> Biodiversity<br><input type="checkbox"/> Human Health<br><input type="checkbox"/> Animal Health<br><input type="checkbox"/> Plant Health<br><input type="checkbox"/> Soil function<br><input type="checkbox"/> Water quality<br><input type="checkbox"/> Sustainable Agriculture                                                    | <input checked="" type="checkbox"/> Influencing factor<br><br><input checked="" type="checkbox"/> Agronomic practice<br><input type="checkbox"/> Plant protection<br><input checked="" type="checkbox"/> GMO cultivation<br><input type="checkbox"/> Environmental conditions |  |                                                                                                                                                                                                                                                                                                                                                                                                                                                                                                                                                                                      |                                                                                                                                                                                                                                                                                                                                         |
| Duplication of Farmer's questionnaire                                       | <input type="checkbox"/> No duplication<br><input type="checkbox"/> Partly duplication<br><input checked="" type="checkbox"/> Complete duplication                                                                                                                                                                                                                                                           |                                                                                                                                                                                                                                                                               |  |                                                                                                                                                                                                                                                                                                                                                                                                                                                                                                                                                                                      |                                                                                                                                                                                                                                                                                                                                         |
| <b>SPECIFICITY</b>                                                          |                                                                                                                                                                                                                                                                                                                                                                                                              |                                                                                                                                                                                                                                                                               |  |                                                                                                                                                                                                                                                                                                                                                                                                                                                                                                                                                                                      |                                                                                                                                                                                                                                                                                                                                         |
| Geography                                                                   | <input type="checkbox"/> EU -wide<br><br><input type="checkbox"/> Zone A – North<br><input type="checkbox"/> Denmark,<br><input type="checkbox"/> Estonia,<br><input type="checkbox"/> Latvia,<br><input type="checkbox"/> Lithuania,<br><input type="checkbox"/> Finland,<br><input type="checkbox"/> Sweden<br><br><input type="checkbox"/> Regional (specify)<br><input type="checkbox"/> Local (specify) |                                                                                                                                                                                                                                                                               |  | <input checked="" type="checkbox"/> Zone B – Centre:<br><input type="checkbox"/> Belgium,<br><input type="checkbox"/> Czech Republic<br><input type="checkbox"/> Germany,<br><input type="checkbox"/> Ireland,<br><input type="checkbox"/> Luxembourg,<br><input type="checkbox"/> Hungary,<br><input type="checkbox"/> Netherlands,<br><input type="checkbox"/> Austria,<br><input type="checkbox"/> Poland,<br><input type="checkbox"/> Romania,<br><input type="checkbox"/> Slovenia,<br><input type="checkbox"/> Slovakia,<br><input checked="" type="checkbox"/> United Kingdom | <input type="checkbox"/> Zone C – South<br><input type="checkbox"/> Bulgaria,<br><input type="checkbox"/> Greece,<br><input type="checkbox"/> Spain,<br><input type="checkbox"/> France,<br><input type="checkbox"/> Italy,<br><input type="checkbox"/> Cyprus,<br><input type="checkbox"/> Malta,<br><input type="checkbox"/> Portugal |
| Factors                                                                     | <input checked="" type="checkbox"/> Multiple species/items (specify): GMO crops<br><input type="checkbox"/> Single species/item (specify) fertiliser use                                                                                                                                                                                                                                                     |                                                                                                                                                                                                                                                                               |  |                                                                                                                                                                                                                                                                                                                                                                                                                                                                                                                                                                                      |                                                                                                                                                                                                                                                                                                                                         |
| Crop                                                                        | <input type="checkbox"/> No specific crop(s)<br><input checked="" type="checkbox"/> Several crops (e.g. all cereals)<br><input type="checkbox"/> Single crop                                                                                                                                                                                                                                                 |                                                                                                                                                                                                                                                                               |  |                                                                                                                                                                                                                                                                                                                                                                                                                                                                                                                                                                                      |                                                                                                                                                                                                                                                                                                                                         |
| Trait /treatment                                                            | <input checked="" type="checkbox"/> No specific traits/treatments<br><input type="checkbox"/> Several traits/treatments<br><input type="checkbox"/> Single trait/treatment                                                                                                                                                                                                                                   |                                                                                                                                                                                                                                                                               |  |                                                                                                                                                                                                                                                                                                                                                                                                                                                                                                                                                                                      |                                                                                                                                                                                                                                                                                                                                         |
| GMO                                                                         | <input type="checkbox"/> No GMO bias<br><input checked="" type="checkbox"/> GMO specific                                                                                                                                                                                                                                                                                                                     |                                                                                                                                                                                                                                                                               |  |                                                                                                                                                                                                                                                                                                                                                                                                                                                                                                                                                                                      |                                                                                                                                                                                                                                                                                                                                         |

| <b>METHODOLOGY</b>                                                                                                                                                                                                                                                                                          |                                                                                                                                                                                                                                                             |
|-------------------------------------------------------------------------------------------------------------------------------------------------------------------------------------------------------------------------------------------------------------------------------------------------------------|-------------------------------------------------------------------------------------------------------------------------------------------------------------------------------------------------------------------------------------------------------------|
| Observations                                                                                                                                                                                                                                                                                                | <input type="checkbox"/> Reported, verifiable methodology<br><input type="checkbox"/> Reported, unverifiable methodology<br><input type="checkbox"/> Unknown, unverifiable methodology                                                                      |
| Frequency                                                                                                                                                                                                                                                                                                   | <input type="checkbox"/> > 1 time/year<br><input type="checkbox"/> 1 time/year<br><input type="checkbox"/> < 1 time/year                                                                                                                                    |
| Future                                                                                                                                                                                                                                                                                                      | <input type="checkbox"/> For ≥ 5 years<br><input type="checkbox"/> between 1 and 5 years<br><input type="checkbox"/> no prospect                                                                                                                            |
| Quality of performers                                                                                                                                                                                                                                                                                       | <input type="checkbox"/> Trained, professionals<br><input type="checkbox"/> Trained, non-professionals – training by documentation, farmers<br><input type="checkbox"/> Uncertain or not -specified                                                         |
| Quality of data                                                                                                                                                                                                                                                                                             | <input checked="" type="checkbox"/> Standard recording of raw data<br><input type="checkbox"/> Free recording of raw data<br><input type="checkbox"/> Anecdotic                                                                                             |
| Analysis                                                                                                                                                                                                                                                                                                    | <input type="checkbox"/> Reported, verifiable methodology<br><input type="checkbox"/> Reported, unverifiable methodology<br><input type="checkbox"/> Unknown, unverifiable methodology                                                                      |
| Quality of analysis                                                                                                                                                                                                                                                                                         | <input type="checkbox"/> Scientifically based<br><input type="checkbox"/> Indicative only<br><input type="checkbox"/> Unknown                                                                                                                               |
| <b>REPORTING</b>                                                                                                                                                                                                                                                                                            |                                                                                                                                                                                                                                                             |
| Language                                                                                                                                                                                                                                                                                                    | Specify reporting language(s): English                                                                                                                                                                                                                      |
| Availability                                                                                                                                                                                                                                                                                                | <input type="checkbox"/> Scientific publication<br><input type="checkbox"/> Official report available on the internet or in other public forum<br><input type="checkbox"/> Official report available from network<br><input type="checkbox"/> Not available |
| Frequency                                                                                                                                                                                                                                                                                                   | <input type="checkbox"/> ≥ 1 time/year<br><input type="checkbox"/> < 1 time/year                                                                                                                                                                            |
| Historical reference                                                                                                                                                                                                                                                                                        | <input type="checkbox"/> over ≥ 5 years<br><input type="checkbox"/> between 1 and 5 years<br><input type="checkbox"/> no historical analysis                                                                                                                |
| <b>COMMENT(S)</b>                                                                                                                                                                                                                                                                                           |                                                                                                                                                                                                                                                             |
| <p>Guidelines were formally endorsed by the UK Government in May 1999, and formed the basis for managing the GM crops in the Government's four-year programme of Farm-Scale Evaluations (FSEs) from 1999-2003. Currently no GM crops grown, hence no reporting. May overlap with farmers questionnaire.</p> |                                                                                                                                                                                                                                                             |

## GSEN-09-0172.00.2 GB – FMA-BSFP

| EuropaBio's coordinated approach to General Surveillance: Existing Networks |                                                                                                                                                                                                                                                                                                                                                                                                                                                                                                                                                                           |                                                                                                                                                                                                                                                                                                                                                                                                                                                                                                                                                                                      |                                                                                                                                                                                                                                                                                                                                         |
|-----------------------------------------------------------------------------|---------------------------------------------------------------------------------------------------------------------------------------------------------------------------------------------------------------------------------------------------------------------------------------------------------------------------------------------------------------------------------------------------------------------------------------------------------------------------------------------------------------------------------------------------------------------------|--------------------------------------------------------------------------------------------------------------------------------------------------------------------------------------------------------------------------------------------------------------------------------------------------------------------------------------------------------------------------------------------------------------------------------------------------------------------------------------------------------------------------------------------------------------------------------------|-----------------------------------------------------------------------------------------------------------------------------------------------------------------------------------------------------------------------------------------------------------------------------------------------------------------------------------------|
| ORGANISATION                                                                |                                                                                                                                                                                                                                                                                                                                                                                                                                                                                                                                                                           |                                                                                                                                                                                                                                                                                                                                                                                                                                                                                                                                                                                      |                                                                                                                                                                                                                                                                                                                                         |
| EuropaBio reference                                                         | GS-EN-09-0172                                                                                                                                                                                                                                                                                                                                                                                                                                                                                                                                                             |                                                                                                                                                                                                                                                                                                                                                                                                                                                                                                                                                                                      |                                                                                                                                                                                                                                                                                                                                         |
| Official name of the Network                                                | <b>DEFRA: British Survey of Fertiliser Practice</b><br>Fertiliser Manufacturers Association                                                                                                                                                                                                                                                                                                                                                                                                                                                                               |                                                                                                                                                                                                                                                                                                                                                                                                                                                                                                                                                                                      |                                                                                                                                                                                                                                                                                                                                         |
| Other names                                                                 | <b>BSFP</b><br>FMA                                                                                                                                                                                                                                                                                                                                                                                                                                                                                                                                                        |                                                                                                                                                                                                                                                                                                                                                                                                                                                                                                                                                                                      |                                                                                                                                                                                                                                                                                                                                         |
| Type of organisation                                                        | Governmental<br>Founded 1942                                                                                                                                                                                                                                                                                                                                                                                                                                                                                                                                              |                                                                                                                                                                                                                                                                                                                                                                                                                                                                                                                                                                                      |                                                                                                                                                                                                                                                                                                                                         |
| Coordinates                                                                 | Economics and Statistics Programme<br>Food and Farming Group<br>Defra<br>Foss House<br>Peasholme Green<br>York<br>YO1 7PX<br><br>Fax: +44 (0) 1904 455242                                                                                                                                                                                                                                                                                                                                                                                                                 |                                                                                                                                                                                                                                                                                                                                                                                                                                                                                                                                                                                      |                                                                                                                                                                                                                                                                                                                                         |
| Website                                                                     | <a href="https://www.gov.uk/government/collections/fertiliser-usage">https://www.gov.uk/government/collections/fertiliser-usage</a><br><a href="https://www.gov.uk/government/statistical-data-sets/british-survey-of-fertiliser-practice-dataset">https://www.gov.uk/government/statistical-data-sets/british-survey-of-fertiliser-practice-dataset</a><br><a href="https://www.gov.uk/government/publications/british-survey-of-fertiliser-practice-user-statement">https://www.gov.uk/government/publications/british-survey-of-fertiliser-practice-user-statement</a> |                                                                                                                                                                                                                                                                                                                                                                                                                                                                                                                                                                                      |                                                                                                                                                                                                                                                                                                                                         |
| Funding                                                                     | jointly funded by the Fertiliser Manufacturers' Association (FMA), the Department for Environment, Food and Rural Affairs (DEFRA) and the Scottish Executive Rural Affairs.                                                                                                                                                                                                                                                                                                                                                                                               |                                                                                                                                                                                                                                                                                                                                                                                                                                                                                                                                                                                      |                                                                                                                                                                                                                                                                                                                                         |
| Conflict of interest                                                        | -                                                                                                                                                                                                                                                                                                                                                                                                                                                                                                                                                                         |                                                                                                                                                                                                                                                                                                                                                                                                                                                                                                                                                                                      |                                                                                                                                                                                                                                                                                                                                         |
| Part of other network(s)                                                    | Survey organised by the Fertiliser Manufacturers' Association (FMA), the Department for Environment, Food and Rural Affairs (DEFRA) and the Scottish Executive Rural Affairs.                                                                                                                                                                                                                                                                                                                                                                                             |                                                                                                                                                                                                                                                                                                                                                                                                                                                                                                                                                                                      |                                                                                                                                                                                                                                                                                                                                         |
| Grouping other network(s)                                                   |                                                                                                                                                                                                                                                                                                                                                                                                                                                                                                                                                                           |                                                                                                                                                                                                                                                                                                                                                                                                                                                                                                                                                                                      |                                                                                                                                                                                                                                                                                                                                         |
| MONITORING SUBJECT                                                          |                                                                                                                                                                                                                                                                                                                                                                                                                                                                                                                                                                           |                                                                                                                                                                                                                                                                                                                                                                                                                                                                                                                                                                                      |                                                                                                                                                                                                                                                                                                                                         |
| Description                                                                 | provides information on fertiliser use on the major crops and grass grown in mainland Britain                                                                                                                                                                                                                                                                                                                                                                                                                                                                             |                                                                                                                                                                                                                                                                                                                                                                                                                                                                                                                                                                                      |                                                                                                                                                                                                                                                                                                                                         |
| Protection goal(s) and/or influencing factor(s)                             | <input type="checkbox"/> Protection goal<br><br><input type="checkbox"/> Biodiversity<br><input type="checkbox"/> Human Health<br><input type="checkbox"/> Animal Health<br><input type="checkbox"/> Plant Health<br><input type="checkbox"/> Soil function<br><input type="checkbox"/> Water quality<br><input type="checkbox"/> Sustainable Agriculture                                                                                                                                                                                                                 | <input checked="" type="checkbox"/> Influencing factor<br><br><input checked="" type="checkbox"/> Agronomic practice<br><input type="checkbox"/> Plant protection<br><input type="checkbox"/> GMO cultivation<br><input type="checkbox"/> Environmental conditions                                                                                                                                                                                                                                                                                                                   |                                                                                                                                                                                                                                                                                                                                         |
| Duplication of Farmer's questionnaire                                       | <input type="checkbox"/> No duplication<br><input checked="" type="checkbox"/> Partly duplication<br><input type="checkbox"/> Complete duplication                                                                                                                                                                                                                                                                                                                                                                                                                        |                                                                                                                                                                                                                                                                                                                                                                                                                                                                                                                                                                                      |                                                                                                                                                                                                                                                                                                                                         |
| SPECIFICITY                                                                 |                                                                                                                                                                                                                                                                                                                                                                                                                                                                                                                                                                           |                                                                                                                                                                                                                                                                                                                                                                                                                                                                                                                                                                                      |                                                                                                                                                                                                                                                                                                                                         |
| Geography                                                                   | <input type="checkbox"/> EU -wide<br><br><input type="checkbox"/> Zone A – North<br><input type="checkbox"/> Denmark,<br><input type="checkbox"/> Estonia,<br><input type="checkbox"/> Latvia,<br><input type="checkbox"/> Lithuania,<br><input type="checkbox"/> Finland,<br><input type="checkbox"/> Sweden                                                                                                                                                                                                                                                             | <input checked="" type="checkbox"/> Zone B – Centre:<br><input type="checkbox"/> Belgium,<br><input type="checkbox"/> Czech Republic<br><input type="checkbox"/> Germany,<br><input type="checkbox"/> Ireland,<br><input type="checkbox"/> Luxembourg,<br><input type="checkbox"/> Hungary,<br><input type="checkbox"/> Netherlands,<br><input type="checkbox"/> Austria,<br><input type="checkbox"/> Poland,<br><input type="checkbox"/> Romania,<br><input type="checkbox"/> Slovenia,<br><input type="checkbox"/> Slovakia,<br><input checked="" type="checkbox"/> United Kingdom | <input type="checkbox"/> Zone C – South<br><input type="checkbox"/> Bulgaria,<br><input type="checkbox"/> Greece,<br><input type="checkbox"/> Spain,<br><input type="checkbox"/> France,<br><input type="checkbox"/> Italy,<br><input type="checkbox"/> Cyprus,<br><input type="checkbox"/> Malta,<br><input type="checkbox"/> Portugal |
|                                                                             | <input type="checkbox"/> Regional (specify)<br><input type="checkbox"/> Local (specify)                                                                                                                                                                                                                                                                                                                                                                                                                                                                                   |                                                                                                                                                                                                                                                                                                                                                                                                                                                                                                                                                                                      |                                                                                                                                                                                                                                                                                                                                         |
| Factors                                                                     | <input type="checkbox"/> Multiple species/items (specify):<br><input checked="" type="checkbox"/> Single species/item (specify) fertiliser use                                                                                                                                                                                                                                                                                                                                                                                                                            |                                                                                                                                                                                                                                                                                                                                                                                                                                                                                                                                                                                      |                                                                                                                                                                                                                                                                                                                                         |
| Crop                                                                        | <input type="checkbox"/> No specific crop(s)<br><input checked="" type="checkbox"/> Several crops (e.g. all cereals)                                                                                                                                                                                                                                                                                                                                                                                                                                                      |                                                                                                                                                                                                                                                                                                                                                                                                                                                                                                                                                                                      |                                                                                                                                                                                                                                                                                                                                         |

|                                                                                                                                                                                                                                                                                                                                                                             |                                                                                                                                                                                                                                                                        |
|-----------------------------------------------------------------------------------------------------------------------------------------------------------------------------------------------------------------------------------------------------------------------------------------------------------------------------------------------------------------------------|------------------------------------------------------------------------------------------------------------------------------------------------------------------------------------------------------------------------------------------------------------------------|
|                                                                                                                                                                                                                                                                                                                                                                             | <input type="checkbox"/> Single crop                                                                                                                                                                                                                                   |
| Trait /treatment                                                                                                                                                                                                                                                                                                                                                            | <input checked="" type="checkbox"/> No specific traits/treatments<br><input type="checkbox"/> Several traits/treatments<br><input type="checkbox"/> Single trait/treatment                                                                                             |
| GMO                                                                                                                                                                                                                                                                                                                                                                         | <input checked="" type="checkbox"/> No GMO bias<br><input type="checkbox"/> GMO specific                                                                                                                                                                               |
| <b>METHODOLOGY</b>                                                                                                                                                                                                                                                                                                                                                          |                                                                                                                                                                                                                                                                        |
| Observations                                                                                                                                                                                                                                                                                                                                                                | <input checked="" type="checkbox"/> Reported, verifiable methodology<br><input type="checkbox"/> Reported, unverifiable methodology<br><input type="checkbox"/> Unknown, unverifiable methodology                                                                      |
| Frequency                                                                                                                                                                                                                                                                                                                                                                   | <input type="checkbox"/> > 1 time/year<br><input checked="" type="checkbox"/> 1 time/year<br><input type="checkbox"/> < 1 time/year                                                                                                                                    |
| Future                                                                                                                                                                                                                                                                                                                                                                      | <input checked="" type="checkbox"/> For ≥ 5 years<br><input type="checkbox"/> between 1 and 5 years<br><input type="checkbox"/> no prospect                                                                                                                            |
| Quality of performers                                                                                                                                                                                                                                                                                                                                                       | <input checked="" type="checkbox"/> Trained, professionals<br><input type="checkbox"/> Trained, non-professionals – training by documentation, volunteers<br><input type="checkbox"/> Uncertain or not -specified                                                      |
| Quality of data                                                                                                                                                                                                                                                                                                                                                             | <input checked="" type="checkbox"/> Standard recording of raw data<br><input type="checkbox"/> Free recording of raw data<br><input type="checkbox"/> Anecdotic                                                                                                        |
| Analysis                                                                                                                                                                                                                                                                                                                                                                    | <input checked="" type="checkbox"/> Reported, verifiable methodology<br><input type="checkbox"/> Reported, unverifiable methodology<br><input type="checkbox"/> Unknown, unverifiable methodology                                                                      |
| Quality of analysis                                                                                                                                                                                                                                                                                                                                                         | <input checked="" type="checkbox"/> Scientifically based<br><input type="checkbox"/> Indicative only<br><input type="checkbox"/> Unknown                                                                                                                               |
| <b>REPORTING</b>                                                                                                                                                                                                                                                                                                                                                            |                                                                                                                                                                                                                                                                        |
| Language                                                                                                                                                                                                                                                                                                                                                                    | Specify reporting language(s): English                                                                                                                                                                                                                                 |
| Availability                                                                                                                                                                                                                                                                                                                                                                | <input type="checkbox"/> Scientific publication<br><input checked="" type="checkbox"/> Official report available on the internet or in other public forum<br><input type="checkbox"/> Official report available from network<br><input type="checkbox"/> Not available |
| Frequency                                                                                                                                                                                                                                                                                                                                                                   | <input checked="" type="checkbox"/> ≥ 1 time/year<br><input type="checkbox"/> < 1 time/year                                                                                                                                                                            |
| Historical reference                                                                                                                                                                                                                                                                                                                                                        | <input checked="" type="checkbox"/> over ≥ 5 years<br><input type="checkbox"/> between 1 and 5 years<br><input type="checkbox"/> no historical analysis                                                                                                                |
| <b>COMMENT(S)</b>                                                                                                                                                                                                                                                                                                                                                           |                                                                                                                                                                                                                                                                        |
| <p>Estimation of the average application rates of nitrogen, phosphate and potash used for agricultural crops and grassland, also sulphur fertiliser products, organic manure and lime. British Survey of Fertiliser Practice – breakdown by product, crop, region etc. Survey design, statistical analysis and reporting are carried out by the University of Edinburgh</p> |                                                                                                                                                                                                                                                                        |

## GSEN-09-0173.00.2 GB – DEFRA

| EuropaBio's coordinated approach to General Surveillance: Existing Networks |                                                                                                                                                                                                                                                                                                                                                                                                                                                                                                                                                                                                                                                                                                                                                                                                                                                                                               |                                                                                                                                                                                                                                                                                                                                                                                                                                                                        |                                                                                                                                                                                                                                                                                              |
|-----------------------------------------------------------------------------|-----------------------------------------------------------------------------------------------------------------------------------------------------------------------------------------------------------------------------------------------------------------------------------------------------------------------------------------------------------------------------------------------------------------------------------------------------------------------------------------------------------------------------------------------------------------------------------------------------------------------------------------------------------------------------------------------------------------------------------------------------------------------------------------------------------------------------------------------------------------------------------------------|------------------------------------------------------------------------------------------------------------------------------------------------------------------------------------------------------------------------------------------------------------------------------------------------------------------------------------------------------------------------------------------------------------------------------------------------------------------------|----------------------------------------------------------------------------------------------------------------------------------------------------------------------------------------------------------------------------------------------------------------------------------------------|
| ORGANISATION                                                                |                                                                                                                                                                                                                                                                                                                                                                                                                                                                                                                                                                                                                                                                                                                                                                                                                                                                                               |                                                                                                                                                                                                                                                                                                                                                                                                                                                                        |                                                                                                                                                                                                                                                                                              |
| EuropaBio reference                                                         | GS-EN-09-0173                                                                                                                                                                                                                                                                                                                                                                                                                                                                                                                                                                                                                                                                                                                                                                                                                                                                                 |                                                                                                                                                                                                                                                                                                                                                                                                                                                                        |                                                                                                                                                                                                                                                                                              |
| Official name of the Network                                                | <b>Department for Environment, Food &amp; Rural Affairs<br/>Biodiversity indicators</b>                                                                                                                                                                                                                                                                                                                                                                                                                                                                                                                                                                                                                                                                                                                                                                                                       |                                                                                                                                                                                                                                                                                                                                                                                                                                                                        |                                                                                                                                                                                                                                                                                              |
| Other names                                                                 | DEFRA                                                                                                                                                                                                                                                                                                                                                                                                                                                                                                                                                                                                                                                                                                                                                                                                                                                                                         |                                                                                                                                                                                                                                                                                                                                                                                                                                                                        |                                                                                                                                                                                                                                                                                              |
| Type of organisation                                                        | Governmental<br>Founded 2001                                                                                                                                                                                                                                                                                                                                                                                                                                                                                                                                                                                                                                                                                                                                                                                                                                                                  |                                                                                                                                                                                                                                                                                                                                                                                                                                                                        |                                                                                                                                                                                                                                                                                              |
| Coordinates                                                                 | Department for Environment, Food & Rural Affairs<br>Nobel House<br>17 Smith Square<br>London<br>SW1P 3JR                                                                                                                                                                                                                                                                                                                                                                                                                                                                                                                                                                                                                                                                                                                                                                                      |                                                                                                                                                                                                                                                                                                                                                                                                                                                                        |                                                                                                                                                                                                                                                                                              |
| Website                                                                     | <a href="https://www.gov.uk/government/organisations/department-for-environment-food-rural-affairs">https://www.gov.uk/government/organisations/department-for-environment-food-rural-affairs</a><br><a href="https://www.gov.uk/government/publications/biodiversity-indicators-for-the-uk">https://www.gov.uk/government/publications/biodiversity-indicators-for-the-uk</a>                                                                                                                                                                                                                                                                                                                                                                                                                                                                                                                |                                                                                                                                                                                                                                                                                                                                                                                                                                                                        |                                                                                                                                                                                                                                                                                              |
| Funding                                                                     | public                                                                                                                                                                                                                                                                                                                                                                                                                                                                                                                                                                                                                                                                                                                                                                                                                                                                                        |                                                                                                                                                                                                                                                                                                                                                                                                                                                                        |                                                                                                                                                                                                                                                                                              |
| Conflict of interest                                                        | -                                                                                                                                                                                                                                                                                                                                                                                                                                                                                                                                                                                                                                                                                                                                                                                                                                                                                             |                                                                                                                                                                                                                                                                                                                                                                                                                                                                        |                                                                                                                                                                                                                                                                                              |
| Part of other network(s)                                                    | -                                                                                                                                                                                                                                                                                                                                                                                                                                                                                                                                                                                                                                                                                                                                                                                                                                                                                             |                                                                                                                                                                                                                                                                                                                                                                                                                                                                        |                                                                                                                                                                                                                                                                                              |
| Grouping other network(s)                                                   | <p>Executive agencies are:</p> <ul style="list-style-type: none"> <li>- Animal Health (launched on 2 April 2007), formerly the State Veterinary Service</li> <li>- Centre for Environment, Fisheries and Aquaculture Science</li> <li>- Food and Environment Research Agency (until April 2009 was called the Central Science Laboratory)</li> <li>- Government Decontamination Service</li> <li>- Marine and Fisheries Agency</li> <li>- Rural Payments Agency</li> <li>- Veterinary Laboratories Agency</li> <li>- Veterinary Medicines Directorate</li> </ul> <p>Key delivery partners:</p> <ul style="list-style-type: none"> <li>- British Waterways</li> <li>- Environment Agency</li> <li>- Forestry Commission</li> <li>- Natural England (launched on 11 October 2006), formerly English Nature and elements of the Countryside Agency and the Rural Development Service.</li> </ul> |                                                                                                                                                                                                                                                                                                                                                                                                                                                                        |                                                                                                                                                                                                                                                                                              |
| MONITORING SUBJECT                                                          |                                                                                                                                                                                                                                                                                                                                                                                                                                                                                                                                                                                                                                                                                                                                                                                                                                                                                               |                                                                                                                                                                                                                                                                                                                                                                                                                                                                        |                                                                                                                                                                                                                                                                                              |
| Description                                                                 | Responsible for policy and regulations on the environment, food and rural affairs. Statistics on food and farming, environment and wildlife. Sustainable Development Indicators.                                                                                                                                                                                                                                                                                                                                                                                                                                                                                                                                                                                                                                                                                                              |                                                                                                                                                                                                                                                                                                                                                                                                                                                                        |                                                                                                                                                                                                                                                                                              |
| Protection goal(s) and/or influencing factor(s)                             | <input checked="" type="checkbox"/> Protection goal<br><br><input checked="" type="checkbox"/> Biodiversity: general<br><input type="checkbox"/> Human Health<br><input type="checkbox"/> Animal Health<br><input type="checkbox"/> Plant Health<br><input type="checkbox"/> Soil function<br><input checked="" type="checkbox"/> Water quality<br><input checked="" type="checkbox"/> Sustainable Agriculture                                                                                                                                                                                                                                                                                                                                                                                                                                                                                | <input checked="" type="checkbox"/> Influencing factor<br><br><input type="checkbox"/> Agronomic practice<br><input type="checkbox"/> Plant protection<br><input type="checkbox"/> GMO cultivation<br><input checked="" type="checkbox"/> Environmental conditions                                                                                                                                                                                                     |                                                                                                                                                                                                                                                                                              |
| Duplication of Farmer's questionnaire                                       | <input checked="" type="checkbox"/> No duplication<br><input type="checkbox"/> Partly duplication<br><input type="checkbox"/> Complete duplication                                                                                                                                                                                                                                                                                                                                                                                                                                                                                                                                                                                                                                                                                                                                            |                                                                                                                                                                                                                                                                                                                                                                                                                                                                        |                                                                                                                                                                                                                                                                                              |
| SPECIFICITY                                                                 |                                                                                                                                                                                                                                                                                                                                                                                                                                                                                                                                                                                                                                                                                                                                                                                                                                                                                               |                                                                                                                                                                                                                                                                                                                                                                                                                                                                        |                                                                                                                                                                                                                                                                                              |
| Geography                                                                   | <input type="checkbox"/> EU -wide<br><br><input type="checkbox"/> Zone A – North<br><input checked="" type="checkbox"/> Zone B – Centre:<br><input type="checkbox"/> Zone C – South                                                                                                                                                                                                                                                                                                                                                                                                                                                                                                                                                                                                                                                                                                           |                                                                                                                                                                                                                                                                                                                                                                                                                                                                        |                                                                                                                                                                                                                                                                                              |
|                                                                             | <input type="checkbox"/> Denmark,<br><input type="checkbox"/> Estonia,<br><input type="checkbox"/> Latvia,<br><input type="checkbox"/> Lithuania,<br><input type="checkbox"/> Finland,<br><input type="checkbox"/> Sweden                                                                                                                                                                                                                                                                                                                                                                                                                                                                                                                                                                                                                                                                     | <input type="checkbox"/> Belgium,<br><input type="checkbox"/> Czech Republic<br><input type="checkbox"/> Germany,<br><input type="checkbox"/> Ireland,<br><input type="checkbox"/> Luxembourg,<br><input type="checkbox"/> Hungary,<br><input type="checkbox"/> Netherlands,<br><input type="checkbox"/> Austria,<br><input type="checkbox"/> Poland,<br><input type="checkbox"/> Romania,<br><input type="checkbox"/> Slovenia,<br><input type="checkbox"/> Slovakia, | <input type="checkbox"/> Bulgaria,<br><input type="checkbox"/> Greece,<br><input type="checkbox"/> Spain,<br><input type="checkbox"/> France,<br><input type="checkbox"/> Italy,<br><input type="checkbox"/> Cyprus,<br><input type="checkbox"/> Malta,<br><input type="checkbox"/> Portugal |

|                                                                                                                                                                                                                                                                                                              |                                                                                                                                                                                                                                                                        |
|--------------------------------------------------------------------------------------------------------------------------------------------------------------------------------------------------------------------------------------------------------------------------------------------------------------|------------------------------------------------------------------------------------------------------------------------------------------------------------------------------------------------------------------------------------------------------------------------|
|                                                                                                                                                                                                                                                                                                              | <input checked="" type="checkbox"/> United Kingdom                                                                                                                                                                                                                     |
|                                                                                                                                                                                                                                                                                                              | <input type="checkbox"/> Regional (specify)<br><input type="checkbox"/> Local (specify)                                                                                                                                                                                |
| Factors                                                                                                                                                                                                                                                                                                      | <input checked="" type="checkbox"/> Multiple species/items (specify): general biodiversity, environment in general, agricultural practice<br><input type="checkbox"/> Single species/item (specify)                                                                    |
| Crop                                                                                                                                                                                                                                                                                                         | <input type="checkbox"/> No specific crop(s)<br><input checked="" type="checkbox"/> Several crops (e.g. all cereals):<br><input type="checkbox"/> Single crop                                                                                                          |
| Trait /treatment                                                                                                                                                                                                                                                                                             | <input checked="" type="checkbox"/> No specific traits/treatments<br><input type="checkbox"/> Several traits/treatments:<br><input type="checkbox"/> Single trait/treatment                                                                                            |
| GMO                                                                                                                                                                                                                                                                                                          | <input checked="" type="checkbox"/> No GMO bias<br><input type="checkbox"/> GMO specific                                                                                                                                                                               |
| <b>METHODOLOGY</b>                                                                                                                                                                                                                                                                                           |                                                                                                                                                                                                                                                                        |
| Observations                                                                                                                                                                                                                                                                                                 | <input type="checkbox"/> Reported, verifiable methodology<br><input type="checkbox"/> Reported, unverifiable methodology<br><input type="checkbox"/> Unknown, unverifiable methodology                                                                                 |
| Frequency                                                                                                                                                                                                                                                                                                    | <input type="checkbox"/> > 1 time/year<br><input checked="" type="checkbox"/> 1 time/year:<br><input type="checkbox"/> < 1 time/year                                                                                                                                   |
| Future                                                                                                                                                                                                                                                                                                       | <input checked="" type="checkbox"/> For ≥ 5 years<br><input type="checkbox"/> between 1 and 5 years<br><input type="checkbox"/> no prospect                                                                                                                            |
| Quality of performers                                                                                                                                                                                                                                                                                        | <input checked="" type="checkbox"/> Trained, professionals<br><input type="checkbox"/> Trained, non-professionals –<br><input type="checkbox"/> Uncertain or not -specified                                                                                            |
| Quality of data                                                                                                                                                                                                                                                                                              | <input type="checkbox"/> Standard recording of raw data<br><input type="checkbox"/> Free recording of raw data<br><input type="checkbox"/> Anecdotic                                                                                                                   |
| Analysis                                                                                                                                                                                                                                                                                                     | <input type="checkbox"/> Reported, verifiable methodology<br><input type="checkbox"/> Reported, unverifiable methodology<br><input type="checkbox"/> Unknown, unverifiable methodology                                                                                 |
| Quality of analysis                                                                                                                                                                                                                                                                                          | <input type="checkbox"/> Scientifically based<br><input type="checkbox"/> Indicative only<br><input type="checkbox"/> Unknown                                                                                                                                          |
| <b>REPORTING</b>                                                                                                                                                                                                                                                                                             |                                                                                                                                                                                                                                                                        |
| Language                                                                                                                                                                                                                                                                                                     | Specify reporting language(s): English                                                                                                                                                                                                                                 |
| Availability                                                                                                                                                                                                                                                                                                 | <input type="checkbox"/> Scientific publication<br><input checked="" type="checkbox"/> Official report available on the internet or in other public forum<br><input type="checkbox"/> Official report available from network<br><input type="checkbox"/> Not available |
| Frequency                                                                                                                                                                                                                                                                                                    | <input checked="" type="checkbox"/> ≥ 1 time/year –<br><input type="checkbox"/> < 1 time/year –                                                                                                                                                                        |
| Historical reference                                                                                                                                                                                                                                                                                         | <input checked="" type="checkbox"/> over ≥ 5 years<br><input type="checkbox"/> between 1 and 5 years<br><input type="checkbox"/> no historical analysis                                                                                                                |
| <b>COMMENT(S)</b>                                                                                                                                                                                                                                                                                            |                                                                                                                                                                                                                                                                        |
| UK Biodiversity Action Plan (BAP): co-ordination, information exchange, identification of research priorities and some reporting on conservation of biodiversity (UK strategy on monitoring surveillance); concordat agreements with country governments/assemblies of Wales, Scotland and Northern Ireland. |                                                                                                                                                                                                                                                                        |

## GSEN-09-0173.00.2 bis GB – DEFRA

| EuropaBio's coordinated approach to General Surveillance: Existing Networks |                                                                                                                                                                                                                                                                                                                                                                |                                                                                                                                                                                                                                                                                                                                                                                                                                                                                                                              |                                                                                                                                                                                                                                                                                              |
|-----------------------------------------------------------------------------|----------------------------------------------------------------------------------------------------------------------------------------------------------------------------------------------------------------------------------------------------------------------------------------------------------------------------------------------------------------|------------------------------------------------------------------------------------------------------------------------------------------------------------------------------------------------------------------------------------------------------------------------------------------------------------------------------------------------------------------------------------------------------------------------------------------------------------------------------------------------------------------------------|----------------------------------------------------------------------------------------------------------------------------------------------------------------------------------------------------------------------------------------------------------------------------------------------|
| <b>ORGANISATION</b>                                                         |                                                                                                                                                                                                                                                                                                                                                                |                                                                                                                                                                                                                                                                                                                                                                                                                                                                                                                              |                                                                                                                                                                                                                                                                                              |
| EuropaBio reference                                                         | GS-EN-09-0173 bis                                                                                                                                                                                                                                                                                                                                              |                                                                                                                                                                                                                                                                                                                                                                                                                                                                                                                              |                                                                                                                                                                                                                                                                                              |
| Official name of the Network                                                | Department for Environment, Food & Rural Affairs<br>Farm practices survey                                                                                                                                                                                                                                                                                      |                                                                                                                                                                                                                                                                                                                                                                                                                                                                                                                              |                                                                                                                                                                                                                                                                                              |
| Other names                                                                 | DEFRA                                                                                                                                                                                                                                                                                                                                                          |                                                                                                                                                                                                                                                                                                                                                                                                                                                                                                                              |                                                                                                                                                                                                                                                                                              |
| Type of organisation                                                        | Governmental<br>Formed June 2001                                                                                                                                                                                                                                                                                                                               |                                                                                                                                                                                                                                                                                                                                                                                                                                                                                                                              |                                                                                                                                                                                                                                                                                              |
| Coordinates                                                                 | Department for Environment, Food & Rural Affairs<br>Nobel House<br>17 Smith Square<br>London<br>SW1P 3JR                                                                                                                                                                                                                                                       |                                                                                                                                                                                                                                                                                                                                                                                                                                                                                                                              |                                                                                                                                                                                                                                                                                              |
| Website                                                                     | <a href="https://www.gov.uk/government/collections/farm-practices-survey">https://www.gov.uk/government/collections/farm-practices-survey</a>                                                                                                                                                                                                                  |                                                                                                                                                                                                                                                                                                                                                                                                                                                                                                                              |                                                                                                                                                                                                                                                                                              |
| Funding                                                                     | public                                                                                                                                                                                                                                                                                                                                                         |                                                                                                                                                                                                                                                                                                                                                                                                                                                                                                                              |                                                                                                                                                                                                                                                                                              |
| Conflict of interest                                                        | -                                                                                                                                                                                                                                                                                                                                                              |                                                                                                                                                                                                                                                                                                                                                                                                                                                                                                                              |                                                                                                                                                                                                                                                                                              |
| Part of other network(s)                                                    | -                                                                                                                                                                                                                                                                                                                                                              |                                                                                                                                                                                                                                                                                                                                                                                                                                                                                                                              |                                                                                                                                                                                                                                                                                              |
| Grouping other network(s)                                                   |                                                                                                                                                                                                                                                                                                                                                                |                                                                                                                                                                                                                                                                                                                                                                                                                                                                                                                              |                                                                                                                                                                                                                                                                                              |
| <b>MONITORING SUBJECT</b>                                                   |                                                                                                                                                                                                                                                                                                                                                                |                                                                                                                                                                                                                                                                                                                                                                                                                                                                                                                              |                                                                                                                                                                                                                                                                                              |
| Description                                                                 | This survey looks at how English farming practices are affected by current agricultural and environmental issues.                                                                                                                                                                                                                                              |                                                                                                                                                                                                                                                                                                                                                                                                                                                                                                                              |                                                                                                                                                                                                                                                                                              |
| Protection goal(s) and/or influencing factor(s)                             | <input type="checkbox"/> Protection goal<br><input type="checkbox"/> Biodiversity: general<br><input type="checkbox"/> Human Health<br><input type="checkbox"/> Animal Health<br><input type="checkbox"/> Plant Health<br><input type="checkbox"/> Soil function<br><input type="checkbox"/> Water quality<br><input type="checkbox"/> Sustainable Agriculture | <input checked="" type="checkbox"/> Influencing factor<br><input checked="" type="checkbox"/> Agronomic practice<br><input type="checkbox"/> Plant protection<br><input type="checkbox"/> GMO cultivation<br><input type="checkbox"/> Environmental conditions                                                                                                                                                                                                                                                               |                                                                                                                                                                                                                                                                                              |
| Duplication of Farmer's questionnaire                                       | <input checked="" type="checkbox"/> No duplication<br><input type="checkbox"/> Partly duplication<br><input type="checkbox"/> Complete duplication                                                                                                                                                                                                             |                                                                                                                                                                                                                                                                                                                                                                                                                                                                                                                              |                                                                                                                                                                                                                                                                                              |
| <b>SPECIFICITY</b>                                                          |                                                                                                                                                                                                                                                                                                                                                                |                                                                                                                                                                                                                                                                                                                                                                                                                                                                                                                              |                                                                                                                                                                                                                                                                                              |
| Geography                                                                   | <input type="checkbox"/> EU -wide<br><input type="checkbox"/> Zone A – North<br><input checked="" type="checkbox"/> Zone B – Centre:<br><input type="checkbox"/> Zone C – South                                                                                                                                                                                |                                                                                                                                                                                                                                                                                                                                                                                                                                                                                                                              |                                                                                                                                                                                                                                                                                              |
|                                                                             | <input type="checkbox"/> Denmark,<br><input type="checkbox"/> Estonia,<br><input type="checkbox"/> Latvia,<br><input type="checkbox"/> Lithuania,<br><input type="checkbox"/> Finland,<br><input type="checkbox"/> Sweden                                                                                                                                      | <input type="checkbox"/> Belgium,<br><input type="checkbox"/> Czech Republic<br><input type="checkbox"/> Germany,<br><input type="checkbox"/> Ireland,<br><input type="checkbox"/> Luxembourg,<br><input type="checkbox"/> Hungary,<br><input type="checkbox"/> Netherlands,<br><input type="checkbox"/> Austria,<br><input type="checkbox"/> Poland,<br><input type="checkbox"/> Romania,<br><input type="checkbox"/> Slovenia,<br><input type="checkbox"/> Slovakia,<br><input checked="" type="checkbox"/> United Kingdom | <input type="checkbox"/> Bulgaria,<br><input type="checkbox"/> Greece,<br><input type="checkbox"/> Spain,<br><input type="checkbox"/> France,<br><input type="checkbox"/> Italy,<br><input type="checkbox"/> Cyprus,<br><input type="checkbox"/> Malta,<br><input type="checkbox"/> Portugal |
|                                                                             | <input type="checkbox"/> Regional (specify)<br><input type="checkbox"/> Local (specify)                                                                                                                                                                                                                                                                        |                                                                                                                                                                                                                                                                                                                                                                                                                                                                                                                              |                                                                                                                                                                                                                                                                                              |
| Factors                                                                     | <input checked="" type="checkbox"/> Multiple species/items (specify): agricultural practice<br><input type="checkbox"/> Single species/item (specify)                                                                                                                                                                                                          |                                                                                                                                                                                                                                                                                                                                                                                                                                                                                                                              |                                                                                                                                                                                                                                                                                              |
| Crop                                                                        | <input type="checkbox"/> No specific crop(s)<br><input checked="" type="checkbox"/> Several crops (e.g. all cereals):<br><input type="checkbox"/> Single crop                                                                                                                                                                                                  |                                                                                                                                                                                                                                                                                                                                                                                                                                                                                                                              |                                                                                                                                                                                                                                                                                              |
| Trait /treatment                                                            | <input checked="" type="checkbox"/> No specific traits/treatments<br><input type="checkbox"/> Several traits/treatments:<br><input type="checkbox"/> Single trait/treatment                                                                                                                                                                                    |                                                                                                                                                                                                                                                                                                                                                                                                                                                                                                                              |                                                                                                                                                                                                                                                                                              |
| GMO                                                                         | <input checked="" type="checkbox"/> No GMO bias<br><input type="checkbox"/> GMO specific                                                                                                                                                                                                                                                                       |                                                                                                                                                                                                                                                                                                                                                                                                                                                                                                                              |                                                                                                                                                                                                                                                                                              |
| <b>METHODOLOGY</b>                                                          |                                                                                                                                                                                                                                                                                                                                                                |                                                                                                                                                                                                                                                                                                                                                                                                                                                                                                                              |                                                                                                                                                                                                                                                                                              |



|                                                                                                                                                                                                                                                                                        |                                                                                                                                                                                                                                                                        |
|----------------------------------------------------------------------------------------------------------------------------------------------------------------------------------------------------------------------------------------------------------------------------------------|------------------------------------------------------------------------------------------------------------------------------------------------------------------------------------------------------------------------------------------------------------------------|
| Observations                                                                                                                                                                                                                                                                           | <input checked="" type="checkbox"/> Reported, verifiable methodology<br><input type="checkbox"/> Reported, unverifiable methodology<br><input type="checkbox"/> Unknown, unverifiable methodology                                                                      |
| Frequency                                                                                                                                                                                                                                                                              | <input type="checkbox"/> > 1 time/year<br><input checked="" type="checkbox"/> 1 time/year:<br><input type="checkbox"/> < 1 time/year                                                                                                                                   |
| Future                                                                                                                                                                                                                                                                                 | <input checked="" type="checkbox"/> For $\geq 5$ years<br><input type="checkbox"/> between 1 and 5 years<br><input type="checkbox"/> no prospect                                                                                                                       |
| Quality of performers                                                                                                                                                                                                                                                                  | <input checked="" type="checkbox"/> Trained, professionals<br><input type="checkbox"/> Trained, non-professionals –<br><input type="checkbox"/> Uncertain or not -specified                                                                                            |
| Quality of data                                                                                                                                                                                                                                                                        | <input type="checkbox"/> Standard recording of raw data<br><input type="checkbox"/> Free recording of raw data<br><input type="checkbox"/> Anecdotic                                                                                                                   |
| Analysis                                                                                                                                                                                                                                                                               | <input checked="" type="checkbox"/> Reported, verifiable methodology<br><input type="checkbox"/> Reported, unverifiable methodology<br><input type="checkbox"/> Unknown, unverifiable methodology                                                                      |
| Quality of analysis                                                                                                                                                                                                                                                                    | <input checked="" type="checkbox"/> Scientifically based<br><input type="checkbox"/> Indicative only<br><input type="checkbox"/> Unknown                                                                                                                               |
| <b>REPORTING</b>                                                                                                                                                                                                                                                                       |                                                                                                                                                                                                                                                                        |
| Language                                                                                                                                                                                                                                                                               | Specify reporting language(s): English                                                                                                                                                                                                                                 |
| Availability                                                                                                                                                                                                                                                                           | <input type="checkbox"/> Scientific publication<br><input checked="" type="checkbox"/> Official report available on the internet or in other public forum<br><input type="checkbox"/> Official report available from network<br><input type="checkbox"/> Not available |
| Frequency                                                                                                                                                                                                                                                                              | <input checked="" type="checkbox"/> $\geq 1$ time/year –<br><input type="checkbox"/> < 1 time/year –                                                                                                                                                                   |
| Historical reference                                                                                                                                                                                                                                                                   | <input checked="" type="checkbox"/> over $\geq 5$ years<br><input type="checkbox"/> between 1 and 5 years<br><input type="checkbox"/> no historical analysis                                                                                                           |
| <b>COMMENT(S)</b>                                                                                                                                                                                                                                                                      |                                                                                                                                                                                                                                                                        |
| Data collection on several topics (soil, computer usage, greenhouse gas mitigation practices, ...). Surveys are available on the web ( <a href="https://www.gov.uk/government/collections/farm-practices-survey">https://www.gov.uk/government/collections/farm-practices-survey</a> ) |                                                                                                                                                                                                                                                                        |

**GSEN-09-0175.00.1 GB – SEED**

| <b>EuropaBio's coordinated approach to General Surveillance: Existing Networks</b>                           |                                                                                                                                                                                                                                                                                                                                                                                                                                                                                                                                                                                                                                                                                                                                                                   |                                                                                                                                                                                                                                                                                                                                                                                                                                                                                                                              |                                                                                                                                                                                                                                                                                              |
|--------------------------------------------------------------------------------------------------------------|-------------------------------------------------------------------------------------------------------------------------------------------------------------------------------------------------------------------------------------------------------------------------------------------------------------------------------------------------------------------------------------------------------------------------------------------------------------------------------------------------------------------------------------------------------------------------------------------------------------------------------------------------------------------------------------------------------------------------------------------------------------------|------------------------------------------------------------------------------------------------------------------------------------------------------------------------------------------------------------------------------------------------------------------------------------------------------------------------------------------------------------------------------------------------------------------------------------------------------------------------------------------------------------------------------|----------------------------------------------------------------------------------------------------------------------------------------------------------------------------------------------------------------------------------------------------------------------------------------------|
| <b>ORGANISATION</b>                                                                                          |                                                                                                                                                                                                                                                                                                                                                                                                                                                                                                                                                                                                                                                                                                                                                                   |                                                                                                                                                                                                                                                                                                                                                                                                                                                                                                                              |                                                                                                                                                                                                                                                                                              |
| EuropaBio reference                                                                                          | GS-EN-09-0175                                                                                                                                                                                                                                                                                                                                                                                                                                                                                                                                                                                                                                                                                                                                                     |                                                                                                                                                                                                                                                                                                                                                                                                                                                                                                                              |                                                                                                                                                                                                                                                                                              |
| Official name of the Network                                                                                 | <b>Scottish Executive Environment Directorate</b>                                                                                                                                                                                                                                                                                                                                                                                                                                                                                                                                                                                                                                                                                                                 |                                                                                                                                                                                                                                                                                                                                                                                                                                                                                                                              |                                                                                                                                                                                                                                                                                              |
| Other names                                                                                                  | SEED                                                                                                                                                                                                                                                                                                                                                                                                                                                                                                                                                                                                                                                                                                                                                              |                                                                                                                                                                                                                                                                                                                                                                                                                                                                                                                              |                                                                                                                                                                                                                                                                                              |
| Type of organisation                                                                                         | Governmental<br>Founded 2007                                                                                                                                                                                                                                                                                                                                                                                                                                                                                                                                                                                                                                                                                                                                      |                                                                                                                                                                                                                                                                                                                                                                                                                                                                                                                              |                                                                                                                                                                                                                                                                                              |
| Coordinates                                                                                                  | The Scottish Government<br>Victoria Quay<br>Edinburgh<br>EH6 6QQ<br><br>Telephone Enquiry Line: +44 (0)8457 741 741                                                                                                                                                                                                                                                                                                                                                                                                                                                                                                                                                                                                                                               |                                                                                                                                                                                                                                                                                                                                                                                                                                                                                                                              |                                                                                                                                                                                                                                                                                              |
| Website                                                                                                      | <a href="http://www.scotland.gov.uk/Topics/Environment">http://www.scotland.gov.uk/Topics/Environment</a>                                                                                                                                                                                                                                                                                                                                                                                                                                                                                                                                                                                                                                                         |                                                                                                                                                                                                                                                                                                                                                                                                                                                                                                                              |                                                                                                                                                                                                                                                                                              |
| Funding                                                                                                      | Public                                                                                                                                                                                                                                                                                                                                                                                                                                                                                                                                                                                                                                                                                                                                                            |                                                                                                                                                                                                                                                                                                                                                                                                                                                                                                                              |                                                                                                                                                                                                                                                                                              |
| Conflict of interest                                                                                         | -                                                                                                                                                                                                                                                                                                                                                                                                                                                                                                                                                                                                                                                                                                                                                                 |                                                                                                                                                                                                                                                                                                                                                                                                                                                                                                                              |                                                                                                                                                                                                                                                                                              |
| Part of other network(s)                                                                                     | -                                                                                                                                                                                                                                                                                                                                                                                                                                                                                                                                                                                                                                                                                                                                                                 |                                                                                                                                                                                                                                                                                                                                                                                                                                                                                                                              |                                                                                                                                                                                                                                                                                              |
| Grouping other network(s)                                                                                    | <p>The Directorates is responsible for four agencies:</p> <ul style="list-style-type: none"> <li>- Scottish Agricultural Science Agency</li> <li>- Forestry Commission Scotland</li> <li>- Scottish Fisheries Protection Agency</li> <li>- Fisheries Research Services</li> </ul> <p>The Directorate sponsors several non-departmental public bodies including:</p> <ul style="list-style-type: none"> <li>- Cairngorms National Park Authority</li> <li>- Crofters Commission</li> <li>- Deer Commission for Scotland</li> <li>- Loch Lomond and the Trossachs National Park Authority</li> <li>- Macaulay Institute</li> <li>- Royal Botanic Garden Edinburgh</li> <li>- Scottish Environment Protection Agency</li> <li>- Scottish Natural Heritage</li> </ul> |                                                                                                                                                                                                                                                                                                                                                                                                                                                                                                                              |                                                                                                                                                                                                                                                                                              |
| <b>MONITORING SUBJECT</b>                                                                                    |                                                                                                                                                                                                                                                                                                                                                                                                                                                                                                                                                                                                                                                                                                                                                                   |                                                                                                                                                                                                                                                                                                                                                                                                                                                                                                                              |                                                                                                                                                                                                                                                                                              |
| Description                                                                                                  | Responsible for policy and regulations on the environment. Statistics on environment and wildlife.                                                                                                                                                                                                                                                                                                                                                                                                                                                                                                                                                                                                                                                                |                                                                                                                                                                                                                                                                                                                                                                                                                                                                                                                              |                                                                                                                                                                                                                                                                                              |
| Protection goal(s) and/or influencing factor(s)                                                              | <input checked="" type="checkbox"/> Protection goal<br><br><input checked="" type="checkbox"/> Biodiversity: general<br><input type="checkbox"/> Human Health<br><input type="checkbox"/> Animal Health<br><input type="checkbox"/> Plant Health<br><input type="checkbox"/> Soil function<br><input type="checkbox"/> Water quality<br><input type="checkbox"/> Sustainable Agriculture                                                                                                                                                                                                                                                                                                                                                                          | <input checked="" type="checkbox"/> Influencing factor<br><br><input checked="" type="checkbox"/> Agronomic practice<br><input type="checkbox"/> Plant protection<br><input checked="" type="checkbox"/> GMO cultivation<br><input type="checkbox"/> Environmental conditions                                                                                                                                                                                                                                                |                                                                                                                                                                                                                                                                                              |
| Duplication of Farmer's questionnaire                                                                        | <input checked="" type="checkbox"/> No duplication<br><input type="checkbox"/> Partly duplication<br><input type="checkbox"/> Complete duplication                                                                                                                                                                                                                                                                                                                                                                                                                                                                                                                                                                                                                |                                                                                                                                                                                                                                                                                                                                                                                                                                                                                                                              |                                                                                                                                                                                                                                                                                              |
| <b>SPECIFICITY</b>                                                                                           |                                                                                                                                                                                                                                                                                                                                                                                                                                                                                                                                                                                                                                                                                                                                                                   |                                                                                                                                                                                                                                                                                                                                                                                                                                                                                                                              |                                                                                                                                                                                                                                                                                              |
| Geography                                                                                                    | <input type="checkbox"/> EU -wide                                                                                                                                                                                                                                                                                                                                                                                                                                                                                                                                                                                                                                                                                                                                 |                                                                                                                                                                                                                                                                                                                                                                                                                                                                                                                              |                                                                                                                                                                                                                                                                                              |
|                                                                                                              | <input type="checkbox"/> Zone A – North                                                                                                                                                                                                                                                                                                                                                                                                                                                                                                                                                                                                                                                                                                                           | <input checked="" type="checkbox"/> Zone B – Centre:                                                                                                                                                                                                                                                                                                                                                                                                                                                                         | <input type="checkbox"/> Zone C – South                                                                                                                                                                                                                                                      |
|                                                                                                              | <input type="checkbox"/> Denmark,<br><input type="checkbox"/> Estonia,<br><input type="checkbox"/> Latvia,<br><input type="checkbox"/> Lithuania,<br><input type="checkbox"/> Finland,<br><input type="checkbox"/> Sweden                                                                                                                                                                                                                                                                                                                                                                                                                                                                                                                                         | <input type="checkbox"/> Belgium,<br><input type="checkbox"/> Czech Republic<br><input type="checkbox"/> Germany,<br><input type="checkbox"/> Ireland,<br><input type="checkbox"/> Luxembourg,<br><input type="checkbox"/> Hungary,<br><input type="checkbox"/> Netherlands,<br><input type="checkbox"/> Austria,<br><input type="checkbox"/> Poland,<br><input type="checkbox"/> Romania,<br><input type="checkbox"/> Slovenia,<br><input type="checkbox"/> Slovakia,<br><input checked="" type="checkbox"/> United Kingdom | <input type="checkbox"/> Bulgaria,<br><input type="checkbox"/> Greece,<br><input type="checkbox"/> Spain,<br><input type="checkbox"/> France,<br><input type="checkbox"/> Italy,<br><input type="checkbox"/> Cyprus,<br><input type="checkbox"/> Malta,<br><input type="checkbox"/> Portugal |
| <input checked="" type="checkbox"/> Regional (specify): Scotland<br><input type="checkbox"/> Local (specify) |                                                                                                                                                                                                                                                                                                                                                                                                                                                                                                                                                                                                                                                                                                                                                                   |                                                                                                                                                                                                                                                                                                                                                                                                                                                                                                                              |                                                                                                                                                                                                                                                                                              |

|                                                                                                                                                                                                                                                                                   |                                                                                                                                                                                                                                                                        |
|-----------------------------------------------------------------------------------------------------------------------------------------------------------------------------------------------------------------------------------------------------------------------------------|------------------------------------------------------------------------------------------------------------------------------------------------------------------------------------------------------------------------------------------------------------------------|
| Factors                                                                                                                                                                                                                                                                           | <input checked="" type="checkbox"/> Multiple species/items (specify): general biodiversity, environment in general, agricultural practice<br><input type="checkbox"/> Single species/item (specify)                                                                    |
| Crop                                                                                                                                                                                                                                                                              | <input type="checkbox"/> No specific crop(s)<br><input checked="" type="checkbox"/> Several crops (e.g. all cereals):<br><input type="checkbox"/> Single crop                                                                                                          |
| Trait /treatment                                                                                                                                                                                                                                                                  | <input checked="" type="checkbox"/> No specific traits/treatments<br><input type="checkbox"/> Several traits/treatments:<br><input type="checkbox"/> Single trait/treatment                                                                                            |
| GMO                                                                                                                                                                                                                                                                               | <input checked="" type="checkbox"/> No GMO bias<br><input type="checkbox"/> GMO specific                                                                                                                                                                               |
| <b>METHODOLOGY</b>                                                                                                                                                                                                                                                                |                                                                                                                                                                                                                                                                        |
| Observations                                                                                                                                                                                                                                                                      | <input type="checkbox"/> Reported, verifiable methodology<br><input type="checkbox"/> Reported, unverifiable methodology<br><input type="checkbox"/> Unknown, unverifiable methodology                                                                                 |
| Frequency                                                                                                                                                                                                                                                                         | <input type="checkbox"/> > 1 time/year<br><input checked="" type="checkbox"/> 1 time/year:<br><input type="checkbox"/> < 1 time/year                                                                                                                                   |
| Future                                                                                                                                                                                                                                                                            | <input checked="" type="checkbox"/> For $\geq 5$ years<br><input type="checkbox"/> between 1 and 5 years<br><input type="checkbox"/> no prospect                                                                                                                       |
| Quality of performers                                                                                                                                                                                                                                                             | <input checked="" type="checkbox"/> Trained, professionals<br><input type="checkbox"/> Trained, non-professionals –<br><input type="checkbox"/> Uncertain or not -specified                                                                                            |
| Quality of data                                                                                                                                                                                                                                                                   | <input type="checkbox"/> Standard recording of raw data<br><input type="checkbox"/> Free recording of raw data<br><input type="checkbox"/> Anecdotic                                                                                                                   |
| Analysis                                                                                                                                                                                                                                                                          | <input type="checkbox"/> Reported, verifiable methodology<br><input type="checkbox"/> Reported, unverifiable methodology<br><input type="checkbox"/> Unknown, unverifiable methodology                                                                                 |
| Quality of analysis                                                                                                                                                                                                                                                               | <input type="checkbox"/> Scientifically based<br><input type="checkbox"/> Indicative only<br><input type="checkbox"/> Unknown                                                                                                                                          |
| <b>REPORTING</b>                                                                                                                                                                                                                                                                  |                                                                                                                                                                                                                                                                        |
| Language                                                                                                                                                                                                                                                                          | Specify reporting language(s): English                                                                                                                                                                                                                                 |
| Availability                                                                                                                                                                                                                                                                      | <input type="checkbox"/> Scientific publication<br><input checked="" type="checkbox"/> Official report available on the internet or in other public forum<br><input type="checkbox"/> Official report available from network<br><input type="checkbox"/> Not available |
| Frequency                                                                                                                                                                                                                                                                         | <input checked="" type="checkbox"/> $\geq 1$ time/year –<br><input type="checkbox"/> < 1 time/year –                                                                                                                                                                   |
| Historical reference                                                                                                                                                                                                                                                              | <input checked="" type="checkbox"/> over $\geq 5$ years<br><input type="checkbox"/> between 1 and 5 years<br><input type="checkbox"/> no historical analysis                                                                                                           |
| <b>COMMENT(S)</b>                                                                                                                                                                                                                                                                 |                                                                                                                                                                                                                                                                        |
| Participates in the UK Biodiversity Action Plan (BAP): 22 biodiversity indicators. Environment statistics available on the web ( <a href="http://www.scotland.gov.uk/Topics/Statistics/Browse/Environment">http://www.scotland.gov.uk/Topics/Statistics/Browse/Environment</a> ). |                                                                                                                                                                                                                                                                        |

## GSEN-09-0177.00.2 GB – Natural England

| EuropaBio's coordinated approach to General Surveillance: Existing Networks |                                                                                                                                                                                                                                                                                                                                                                                                                                                                                                                                                                                      |                                                                                                                                                                                                                                                                                                                                         |  |
|-----------------------------------------------------------------------------|--------------------------------------------------------------------------------------------------------------------------------------------------------------------------------------------------------------------------------------------------------------------------------------------------------------------------------------------------------------------------------------------------------------------------------------------------------------------------------------------------------------------------------------------------------------------------------------|-----------------------------------------------------------------------------------------------------------------------------------------------------------------------------------------------------------------------------------------------------------------------------------------------------------------------------------------|--|
| <b>ORGANISATION</b>                                                         |                                                                                                                                                                                                                                                                                                                                                                                                                                                                                                                                                                                      |                                                                                                                                                                                                                                                                                                                                         |  |
| EuropaBio reference                                                         | GS-EN-09-0177                                                                                                                                                                                                                                                                                                                                                                                                                                                                                                                                                                        |                                                                                                                                                                                                                                                                                                                                         |  |
| Official name of the Network                                                | <b>Natural England</b>                                                                                                                                                                                                                                                                                                                                                                                                                                                                                                                                                               |                                                                                                                                                                                                                                                                                                                                         |  |
| Other names                                                                 | Formerly English Nature                                                                                                                                                                                                                                                                                                                                                                                                                                                                                                                                                              |                                                                                                                                                                                                                                                                                                                                         |  |
| Type of organisation                                                        | Nature conservation<br>Founded 2006                                                                                                                                                                                                                                                                                                                                                                                                                                                                                                                                                  |                                                                                                                                                                                                                                                                                                                                         |  |
| Coordinates                                                                 | Head Office<br>Natural England,<br>1 East Parade,<br>Sheffield, S1 2ET<br><br>Fax: 0300 060 1622<br>email: enquiries[at]naturalengland.org.uk                                                                                                                                                                                                                                                                                                                                                                                                                                        |                                                                                                                                                                                                                                                                                                                                         |  |
| Website                                                                     | <a href="http://www.naturalengland.org.uk">http://www.naturalengland.org.uk</a>                                                                                                                                                                                                                                                                                                                                                                                                                                                                                                      |                                                                                                                                                                                                                                                                                                                                         |  |
| Funding                                                                     | DEFRA<br>Grants from the European Union, the Rural Payments Agency and the Forestry Commission<br>Income from activities                                                                                                                                                                                                                                                                                                                                                                                                                                                             |                                                                                                                                                                                                                                                                                                                                         |  |
| Conflict of interest                                                        | -                                                                                                                                                                                                                                                                                                                                                                                                                                                                                                                                                                                    |                                                                                                                                                                                                                                                                                                                                         |  |
| Part of other network(s)                                                    | -                                                                                                                                                                                                                                                                                                                                                                                                                                                                                                                                                                                    |                                                                                                                                                                                                                                                                                                                                         |  |
| Grouping other network(s)                                                   | several regional offices                                                                                                                                                                                                                                                                                                                                                                                                                                                                                                                                                             |                                                                                                                                                                                                                                                                                                                                         |  |
| <b>MONITORING SUBJECT</b>                                                   |                                                                                                                                                                                                                                                                                                                                                                                                                                                                                                                                                                                      |                                                                                                                                                                                                                                                                                                                                         |  |
| Description                                                                 | Conservation<br>Environmental Stewardship<br>Participates in the UK Biodiversity Action Plan                                                                                                                                                                                                                                                                                                                                                                                                                                                                                         |                                                                                                                                                                                                                                                                                                                                         |  |
| Protection goal(s) and/or influencing factor(s)                             | <input checked="" type="checkbox"/> Protection goal<br><br><input checked="" type="checkbox"/> Biodiversity: general<br><input type="checkbox"/> Human Health<br><input type="checkbox"/> Animal Health<br><input type="checkbox"/> Plant Health<br><input type="checkbox"/> Soil function<br><input type="checkbox"/> Water quality<br><input type="checkbox"/> Sustainable Agriculture                                                                                                                                                                                             | <input checked="" type="checkbox"/> Influencing factor<br><br><input type="checkbox"/> Agronomic practice<br><input type="checkbox"/> Plant protection<br><input type="checkbox"/> GMO cultivation<br><input checked="" type="checkbox"/> Environmental conditions                                                                      |  |
| Duplication of Farmer's questionnaire                                       | <input type="checkbox"/> No duplication<br><input type="checkbox"/> Partly duplication<br><input type="checkbox"/> Complete duplication                                                                                                                                                                                                                                                                                                                                                                                                                                              |                                                                                                                                                                                                                                                                                                                                         |  |
| <b>SPECIFICITY</b>                                                          |                                                                                                                                                                                                                                                                                                                                                                                                                                                                                                                                                                                      |                                                                                                                                                                                                                                                                                                                                         |  |
| Geography                                                                   | <input type="checkbox"/> EU -wide<br><br><input type="checkbox"/> Zone A – North<br><input type="checkbox"/> Denmark,<br><input type="checkbox"/> Estonia,<br><input type="checkbox"/> Latvia,<br><input type="checkbox"/> Lithuania,<br><input type="checkbox"/> Finland,<br><input type="checkbox"/> Sweden                                                                                                                                                                                                                                                                        |                                                                                                                                                                                                                                                                                                                                         |  |
|                                                                             | <input checked="" type="checkbox"/> Zone B – Centre:<br><input type="checkbox"/> Belgium,<br><input type="checkbox"/> Czech Republic<br><input type="checkbox"/> Germany,<br><input type="checkbox"/> Ireland,<br><input type="checkbox"/> Luxembourg,<br><input type="checkbox"/> Hungary,<br><input type="checkbox"/> Netherlands,<br><input type="checkbox"/> Austria,<br><input type="checkbox"/> Poland,<br><input type="checkbox"/> Romania,<br><input type="checkbox"/> Slovenia,<br><input type="checkbox"/> Slovakia,<br><input checked="" type="checkbox"/> United Kingdom | <input type="checkbox"/> Zone C – South<br><input type="checkbox"/> Bulgaria,<br><input type="checkbox"/> Greece,<br><input type="checkbox"/> Spain,<br><input type="checkbox"/> France,<br><input type="checkbox"/> Italy,<br><input type="checkbox"/> Cyprus,<br><input type="checkbox"/> Malta,<br><input type="checkbox"/> Portugal |  |
|                                                                             | <input checked="" type="checkbox"/> Regional (specify): England<br><input type="checkbox"/> Local (specify)                                                                                                                                                                                                                                                                                                                                                                                                                                                                          |                                                                                                                                                                                                                                                                                                                                         |  |
| Factors                                                                     | <input checked="" type="checkbox"/> Multiple species/items (specify): general biodiversity<br><input type="checkbox"/> Single species/item (specify)                                                                                                                                                                                                                                                                                                                                                                                                                                 |                                                                                                                                                                                                                                                                                                                                         |  |
| Crop                                                                        | <input checked="" type="checkbox"/> No specific crop(s)<br><input type="checkbox"/> Several crops (e.g. all cereals):<br><input type="checkbox"/> Single crop                                                                                                                                                                                                                                                                                                                                                                                                                        |                                                                                                                                                                                                                                                                                                                                         |  |
| Trait /treatment                                                            | <input checked="" type="checkbox"/> No specific traits/treatments<br><input type="checkbox"/> Several traits/treatments                                                                                                                                                                                                                                                                                                                                                                                                                                                              |                                                                                                                                                                                                                                                                                                                                         |  |

|                                                                                                                                                                                                                                                                                                                                                                |                                                                                                                                                                                                                                                                        |
|----------------------------------------------------------------------------------------------------------------------------------------------------------------------------------------------------------------------------------------------------------------------------------------------------------------------------------------------------------------|------------------------------------------------------------------------------------------------------------------------------------------------------------------------------------------------------------------------------------------------------------------------|
|                                                                                                                                                                                                                                                                                                                                                                | <input type="checkbox"/> Single trait/treatment                                                                                                                                                                                                                        |
| GMO                                                                                                                                                                                                                                                                                                                                                            | <input checked="" type="checkbox"/> No GMO bias<br><input type="checkbox"/> GMO specific                                                                                                                                                                               |
| <b>METHODOLOGY</b>                                                                                                                                                                                                                                                                                                                                             |                                                                                                                                                                                                                                                                        |
| Observations                                                                                                                                                                                                                                                                                                                                                   | <input type="checkbox"/> Reported, verifiable methodology<br><input type="checkbox"/> Reported, unverifiable methodology<br><input type="checkbox"/> Unknown, unverifiable methodology                                                                                 |
| Frequency                                                                                                                                                                                                                                                                                                                                                      | <input type="checkbox"/> > 1 time/year<br><input type="checkbox"/> 1 time/year:<br><input type="checkbox"/> < 1 time/year                                                                                                                                              |
| Future                                                                                                                                                                                                                                                                                                                                                         | <input type="checkbox"/> For ≥ 5 years<br><input type="checkbox"/> between 1 and 5 years<br><input type="checkbox"/> no prospect                                                                                                                                       |
| Quality of performers                                                                                                                                                                                                                                                                                                                                          | <input type="checkbox"/> Trained, professionals<br><input type="checkbox"/> Trained, non-professionals –<br><input type="checkbox"/> Uncertain or not -specified                                                                                                       |
| Quality of data                                                                                                                                                                                                                                                                                                                                                | <input type="checkbox"/> Standard recording of raw data<br><input type="checkbox"/> Free recording of raw data<br><input type="checkbox"/> Anecdotic                                                                                                                   |
| Analysis                                                                                                                                                                                                                                                                                                                                                       | <input type="checkbox"/> Reported, verifiable methodology<br><input type="checkbox"/> Reported, unverifiable methodology<br><input type="checkbox"/> Unknown, unverifiable methodology                                                                                 |
| Quality of analysis                                                                                                                                                                                                                                                                                                                                            | <input type="checkbox"/> Scientifically based<br><input type="checkbox"/> Indicative only<br><input type="checkbox"/> Unknown                                                                                                                                          |
| <b>REPORTING</b>                                                                                                                                                                                                                                                                                                                                               |                                                                                                                                                                                                                                                                        |
| Language                                                                                                                                                                                                                                                                                                                                                       | Specify reporting language(s): English                                                                                                                                                                                                                                 |
| Availability                                                                                                                                                                                                                                                                                                                                                   | <input type="checkbox"/> Scientific publication<br><input checked="" type="checkbox"/> Official report available on the internet or in other public forum<br><input type="checkbox"/> Official report available from network<br><input type="checkbox"/> Not available |
| Frequency                                                                                                                                                                                                                                                                                                                                                      | <input checked="" type="checkbox"/> ≥ 1 time/year –<br><input type="checkbox"/> < 1 time/year –                                                                                                                                                                        |
| Historical reference                                                                                                                                                                                                                                                                                                                                           | <input type="checkbox"/> over ≥ 5 years<br><input checked="" type="checkbox"/> between 1 and 5 years<br><input type="checkbox"/> no historical analysis                                                                                                                |
| <b>COMMENT(S)</b>                                                                                                                                                                                                                                                                                                                                              |                                                                                                                                                                                                                                                                        |
| Scientific research and education, combined with presence in nature conservation activities. Annual reviews, maps (a.o. on Agri-environment Schemes to improve wildlife on farmland), Natural England “State of” reports ( <a href="http://publications.naturalengland.org.uk/category/118044">http://publications.naturalengland.org.uk/category/118044</a> ) |                                                                                                                                                                                                                                                                        |

## GSEN-09-0178.00.1 GB – Scottish Natural Heritage

| EuropaBio's coordinated approach to General Surveillance: Existing Networks |                                                                                                                                                                                                                                                                                                                               |                                                                                                                                                                                                                                                                                                                                                                                                                                                                                                                              |                                                                                                                                                                                                                                                                                              |
|-----------------------------------------------------------------------------|-------------------------------------------------------------------------------------------------------------------------------------------------------------------------------------------------------------------------------------------------------------------------------------------------------------------------------|------------------------------------------------------------------------------------------------------------------------------------------------------------------------------------------------------------------------------------------------------------------------------------------------------------------------------------------------------------------------------------------------------------------------------------------------------------------------------------------------------------------------------|----------------------------------------------------------------------------------------------------------------------------------------------------------------------------------------------------------------------------------------------------------------------------------------------|
| <b>ORGANISATION</b>                                                         |                                                                                                                                                                                                                                                                                                                               |                                                                                                                                                                                                                                                                                                                                                                                                                                                                                                                              |                                                                                                                                                                                                                                                                                              |
| EuropaBio reference                                                         | GS-EN-09-0178                                                                                                                                                                                                                                                                                                                 |                                                                                                                                                                                                                                                                                                                                                                                                                                                                                                                              |                                                                                                                                                                                                                                                                                              |
| Official name of the Network                                                | Scottish Natural Heritage                                                                                                                                                                                                                                                                                                     |                                                                                                                                                                                                                                                                                                                                                                                                                                                                                                                              |                                                                                                                                                                                                                                                                                              |
| Other names                                                                 | SNH                                                                                                                                                                                                                                                                                                                           |                                                                                                                                                                                                                                                                                                                                                                                                                                                                                                                              |                                                                                                                                                                                                                                                                                              |
| Type of organisation                                                        | Governmental<br>Founded 1992                                                                                                                                                                                                                                                                                                  |                                                                                                                                                                                                                                                                                                                                                                                                                                                                                                                              |                                                                                                                                                                                                                                                                                              |
| Coordinates                                                                 | Head Office<br>Great Glen House,<br>Leachkin Road,<br>Inverness, IV3 8NW<br><br>Fax: +44 (0)1463 725067<br>email: enquiries[at]snh.gov.uk                                                                                                                                                                                     |                                                                                                                                                                                                                                                                                                                                                                                                                                                                                                                              |                                                                                                                                                                                                                                                                                              |
| Website                                                                     | <a href="http://www.snh.org.uk/">http://www.snh.org.uk/</a>                                                                                                                                                                                                                                                                   |                                                                                                                                                                                                                                                                                                                                                                                                                                                                                                                              |                                                                                                                                                                                                                                                                                              |
| Funding                                                                     | public                                                                                                                                                                                                                                                                                                                        |                                                                                                                                                                                                                                                                                                                                                                                                                                                                                                                              |                                                                                                                                                                                                                                                                                              |
| Conflict of interest                                                        | -                                                                                                                                                                                                                                                                                                                             |                                                                                                                                                                                                                                                                                                                                                                                                                                                                                                                              |                                                                                                                                                                                                                                                                                              |
| Part of other network(s)                                                    | member of SEARS (Scotland's Environmental and Rural Services).                                                                                                                                                                                                                                                                |                                                                                                                                                                                                                                                                                                                                                                                                                                                                                                                              |                                                                                                                                                                                                                                                                                              |
| Grouping other network(s)                                                   | -several regional offices/units                                                                                                                                                                                                                                                                                               |                                                                                                                                                                                                                                                                                                                                                                                                                                                                                                                              |                                                                                                                                                                                                                                                                                              |
| <b>MONITORING SUBJECT</b>                                                   |                                                                                                                                                                                                                                                                                                                               |                                                                                                                                                                                                                                                                                                                                                                                                                                                                                                                              |                                                                                                                                                                                                                                                                                              |
| Description                                                                 | Acts as a government agent in the delivery of conservation designations<br>Develops policy, provides grants, carries out research, provides advice and information.<br><br>Participates in the UK Biodiversity Action Plan<br>Indicator species                                                                               |                                                                                                                                                                                                                                                                                                                                                                                                                                                                                                                              |                                                                                                                                                                                                                                                                                              |
| Protection goal(s) and/or influencing factor(s)                             | <input checked="" type="checkbox"/> Protection goal                                                                                                                                                                                                                                                                           | <input type="checkbox"/> Influencing factor                                                                                                                                                                                                                                                                                                                                                                                                                                                                                  |                                                                                                                                                                                                                                                                                              |
|                                                                             | <input checked="" type="checkbox"/> Biodiversity: general<br><input type="checkbox"/> Human Health<br><input type="checkbox"/> Animal Health<br><input type="checkbox"/> Plant Health<br><input type="checkbox"/> Soil function<br><input type="checkbox"/> Water quality<br><input type="checkbox"/> Sustainable Agriculture | <input type="checkbox"/> Agronomic practice<br><input type="checkbox"/> Plant protection<br><input type="checkbox"/> GMO cultivation<br><input type="checkbox"/> Environmental conditions                                                                                                                                                                                                                                                                                                                                    |                                                                                                                                                                                                                                                                                              |
| Duplication of Farmer's questionnaire                                       | <input type="checkbox"/> No duplication<br><input type="checkbox"/> Partly duplication<br><input type="checkbox"/> Complete duplication                                                                                                                                                                                       |                                                                                                                                                                                                                                                                                                                                                                                                                                                                                                                              |                                                                                                                                                                                                                                                                                              |
| <b>SPECIFICITY</b>                                                          |                                                                                                                                                                                                                                                                                                                               |                                                                                                                                                                                                                                                                                                                                                                                                                                                                                                                              |                                                                                                                                                                                                                                                                                              |
| Geography                                                                   | <input type="checkbox"/> EU -wide                                                                                                                                                                                                                                                                                             |                                                                                                                                                                                                                                                                                                                                                                                                                                                                                                                              |                                                                                                                                                                                                                                                                                              |
|                                                                             | <input type="checkbox"/> Zone A – North                                                                                                                                                                                                                                                                                       | <input checked="" type="checkbox"/> Zone B – Centre:                                                                                                                                                                                                                                                                                                                                                                                                                                                                         | <input type="checkbox"/> Zone C – South                                                                                                                                                                                                                                                      |
|                                                                             | <input type="checkbox"/> Denmark,<br><input type="checkbox"/> Estonia,<br><input type="checkbox"/> Latvia,<br><input type="checkbox"/> Lithuania,<br><input type="checkbox"/> Finland,<br><input type="checkbox"/> Sweden                                                                                                     | <input type="checkbox"/> Belgium,<br><input type="checkbox"/> Czech Republic<br><input type="checkbox"/> Germany,<br><input type="checkbox"/> Ireland,<br><input type="checkbox"/> Luxembourg,<br><input type="checkbox"/> Hungary,<br><input type="checkbox"/> Netherlands,<br><input type="checkbox"/> Austria,<br><input type="checkbox"/> Poland,<br><input type="checkbox"/> Romania,<br><input type="checkbox"/> Slovenia,<br><input type="checkbox"/> Slovakia,<br><input checked="" type="checkbox"/> United Kingdom | <input type="checkbox"/> Bulgaria,<br><input type="checkbox"/> Greece,<br><input type="checkbox"/> Spain,<br><input type="checkbox"/> France,<br><input type="checkbox"/> Italy,<br><input type="checkbox"/> Cyprus,<br><input type="checkbox"/> Malta,<br><input type="checkbox"/> Portugal |
|                                                                             | <input checked="" type="checkbox"/> Regional (specify): Scotland<br><input type="checkbox"/> Local (specify)                                                                                                                                                                                                                  |                                                                                                                                                                                                                                                                                                                                                                                                                                                                                                                              |                                                                                                                                                                                                                                                                                              |
| Factors                                                                     | <input checked="" type="checkbox"/> Multiple species/items (specify): general biodiversity<br><input type="checkbox"/> Single species/item (specify)                                                                                                                                                                          |                                                                                                                                                                                                                                                                                                                                                                                                                                                                                                                              |                                                                                                                                                                                                                                                                                              |
| Crop                                                                        | <input checked="" type="checkbox"/> No specific crop(s)<br><input type="checkbox"/> Several crops (e.g. all cereals):<br><input type="checkbox"/> Single crop                                                                                                                                                                 |                                                                                                                                                                                                                                                                                                                                                                                                                                                                                                                              |                                                                                                                                                                                                                                                                                              |
| Trait /treatment                                                            | <input checked="" type="checkbox"/> No specific traits/treatments<br><input type="checkbox"/> Several traits/treatments                                                                                                                                                                                                       |                                                                                                                                                                                                                                                                                                                                                                                                                                                                                                                              |                                                                                                                                                                                                                                                                                              |

|                                                                                                                                                                                                                                                                                                                                                                                                                                                                  |                                                                                                                                                                                                                                                                                   |
|------------------------------------------------------------------------------------------------------------------------------------------------------------------------------------------------------------------------------------------------------------------------------------------------------------------------------------------------------------------------------------------------------------------------------------------------------------------|-----------------------------------------------------------------------------------------------------------------------------------------------------------------------------------------------------------------------------------------------------------------------------------|
|                                                                                                                                                                                                                                                                                                                                                                                                                                                                  | <input type="checkbox"/> Single trait/treatment                                                                                                                                                                                                                                   |
| GMO                                                                                                                                                                                                                                                                                                                                                                                                                                                              | <input checked="" type="checkbox"/> No GMO bias<br><input type="checkbox"/> GMO specific                                                                                                                                                                                          |
| <b>METHODOLOGY</b>                                                                                                                                                                                                                                                                                                                                                                                                                                               |                                                                                                                                                                                                                                                                                   |
| Observations                                                                                                                                                                                                                                                                                                                                                                                                                                                     | <input type="checkbox"/> Reported, verifiable methodology<br><input type="checkbox"/> Reported, unverifiable methodology<br><input type="checkbox"/> Unknown, unverifiable methodology                                                                                            |
| Frequency                                                                                                                                                                                                                                                                                                                                                                                                                                                        | <input type="checkbox"/> > 1 time/year<br><input type="checkbox"/> 1 time/year:<br><input type="checkbox"/> < 1 time/year                                                                                                                                                         |
| Future                                                                                                                                                                                                                                                                                                                                                                                                                                                           | <input type="checkbox"/> For ≥ 5 years<br><input type="checkbox"/> between 1 and 5 years<br><input type="checkbox"/> no prospect                                                                                                                                                  |
| Quality of performers                                                                                                                                                                                                                                                                                                                                                                                                                                            | <input type="checkbox"/> Trained, professionals<br><input type="checkbox"/> Trained, non-professionals –<br><input type="checkbox"/> Uncertain or not -specified                                                                                                                  |
| Quality of data                                                                                                                                                                                                                                                                                                                                                                                                                                                  | <input type="checkbox"/> Standard recording of raw data<br><input type="checkbox"/> Free recording of raw data<br><input type="checkbox"/> Anecdotic                                                                                                                              |
| Analysis                                                                                                                                                                                                                                                                                                                                                                                                                                                         | <input type="checkbox"/> Reported, verifiable methodology<br><input type="checkbox"/> Reported, unverifiable methodology<br><input type="checkbox"/> Unknown, unverifiable methodology                                                                                            |
| Quality of analysis                                                                                                                                                                                                                                                                                                                                                                                                                                              | <input type="checkbox"/> Scientifically based<br><input type="checkbox"/> Indicative only<br><input type="checkbox"/> Unknown                                                                                                                                                     |
| <b>REPORTING</b>                                                                                                                                                                                                                                                                                                                                                                                                                                                 |                                                                                                                                                                                                                                                                                   |
| Language                                                                                                                                                                                                                                                                                                                                                                                                                                                         | Specify reporting language(s): English                                                                                                                                                                                                                                            |
| Availability                                                                                                                                                                                                                                                                                                                                                                                                                                                     | <input checked="" type="checkbox"/> Scientific publication<br><input checked="" type="checkbox"/> Official report available on the internet or in other public forum<br><input type="checkbox"/> Official report available from network<br><input type="checkbox"/> Not available |
| Frequency                                                                                                                                                                                                                                                                                                                                                                                                                                                        | <input checked="" type="checkbox"/> ≥ 1 time/year –<br><input type="checkbox"/> < 1 time/year –                                                                                                                                                                                   |
| Historical reference                                                                                                                                                                                                                                                                                                                                                                                                                                             | <input checked="" type="checkbox"/> over ≥ 5 years<br><input type="checkbox"/> between 1 and 5 years<br><input type="checkbox"/> no historical analysis                                                                                                                           |
| <b>COMMENT(S)</b>                                                                                                                                                                                                                                                                                                                                                                                                                                                |                                                                                                                                                                                                                                                                                   |
| Scientific research and education, combined with presence in nature conservation activities. Biodiversity indicators ( <a href="http://gateway.snh.gov.uk/pls/htmldb_cagdb1/snhlive.tai_disp_template_pkg.display_std_page?p_type_id=2&amp;p_cat_id=2&amp;p_topic_id=49&amp;p_class=teaching">http://gateway.snh.gov.uk/pls/htmldb_cagdb1/snhlive.tai_disp_template_pkg.display_std_page?p_type_id=2&amp;p_cat_id=2&amp;p_topic_id=49&amp;p_class=teaching</a> ) |                                                                                                                                                                                                                                                                                   |

## GSEN-09-0179.00.1 GB – CEH

| EuropaBio's coordinated approach to General Surveillance: Existing Networks |                                                                                                                                                                                                                                                                                                                                                                                                              |                                                                                                                                                                                                                                                                    |  |                                                                                                                                                                                                                                                                                                                                                                                                                                                                                                                                                                                      |                                                                                                                                                                                                                                                                                                                                         |
|-----------------------------------------------------------------------------|--------------------------------------------------------------------------------------------------------------------------------------------------------------------------------------------------------------------------------------------------------------------------------------------------------------------------------------------------------------------------------------------------------------|--------------------------------------------------------------------------------------------------------------------------------------------------------------------------------------------------------------------------------------------------------------------|--|--------------------------------------------------------------------------------------------------------------------------------------------------------------------------------------------------------------------------------------------------------------------------------------------------------------------------------------------------------------------------------------------------------------------------------------------------------------------------------------------------------------------------------------------------------------------------------------|-----------------------------------------------------------------------------------------------------------------------------------------------------------------------------------------------------------------------------------------------------------------------------------------------------------------------------------------|
| <b>ORGANISATION</b>                                                         |                                                                                                                                                                                                                                                                                                                                                                                                              |                                                                                                                                                                                                                                                                    |  |                                                                                                                                                                                                                                                                                                                                                                                                                                                                                                                                                                                      |                                                                                                                                                                                                                                                                                                                                         |
| EuropaBio reference                                                         | GS-EN-09-0179                                                                                                                                                                                                                                                                                                                                                                                                |                                                                                                                                                                                                                                                                    |  |                                                                                                                                                                                                                                                                                                                                                                                                                                                                                                                                                                                      |                                                                                                                                                                                                                                                                                                                                         |
| Official name of the Network                                                | <b>Centre for Ecology and Hydrology</b><br>research centre of NERC                                                                                                                                                                                                                                                                                                                                           |                                                                                                                                                                                                                                                                    |  |                                                                                                                                                                                                                                                                                                                                                                                                                                                                                                                                                                                      |                                                                                                                                                                                                                                                                                                                                         |
| Other names                                                                 | <b>CEH</b>                                                                                                                                                                                                                                                                                                                                                                                                   |                                                                                                                                                                                                                                                                    |  |                                                                                                                                                                                                                                                                                                                                                                                                                                                                                                                                                                                      |                                                                                                                                                                                                                                                                                                                                         |
| Type of organisation                                                        | Academic<br>Founded (unknown)                                                                                                                                                                                                                                                                                                                                                                                |                                                                                                                                                                                                                                                                    |  |                                                                                                                                                                                                                                                                                                                                                                                                                                                                                                                                                                                      |                                                                                                                                                                                                                                                                                                                                         |
| Coordinates                                                                 | Centre for Ecology & Hydrology, Headquarters<br>Macleon Building,<br>Benson Lane,<br>Crowmarsh Gifford,<br>Wallingford,<br>Oxfordshire,<br>OX10 8BB<br><br>Fax: +44 (0)1491 692424                                                                                                                                                                                                                           |                                                                                                                                                                                                                                                                    |  |                                                                                                                                                                                                                                                                                                                                                                                                                                                                                                                                                                                      |                                                                                                                                                                                                                                                                                                                                         |
| Website                                                                     | <a href="http://www.ceh.ac.uk/">http://www.ceh.ac.uk/</a>                                                                                                                                                                                                                                                                                                                                                    |                                                                                                                                                                                                                                                                    |  |                                                                                                                                                                                                                                                                                                                                                                                                                                                                                                                                                                                      |                                                                                                                                                                                                                                                                                                                                         |
| Funding                                                                     | NERC (public)<br>external customers and from European Research Framework Programmes                                                                                                                                                                                                                                                                                                                          |                                                                                                                                                                                                                                                                    |  |                                                                                                                                                                                                                                                                                                                                                                                                                                                                                                                                                                                      |                                                                                                                                                                                                                                                                                                                                         |
| Conflict of interest                                                        | -                                                                                                                                                                                                                                                                                                                                                                                                            |                                                                                                                                                                                                                                                                    |  |                                                                                                                                                                                                                                                                                                                                                                                                                                                                                                                                                                                      |                                                                                                                                                                                                                                                                                                                                         |
| Part of other network(s)                                                    | - engaged in major international networks, such as the Partnership for European Environmental Research (PEER) and the EurAqua Network of European Freshwater Research Organisations. Also lead in European and global research efforts including the International Cooperative Programme on Effects of Air Pollution on Natural Vegetation and Crops and NitroEurope.                                        |                                                                                                                                                                                                                                                                    |  |                                                                                                                                                                                                                                                                                                                                                                                                                                                                                                                                                                                      |                                                                                                                                                                                                                                                                                                                                         |
| Grouping other network(s)                                                   | -                                                                                                                                                                                                                                                                                                                                                                                                            |                                                                                                                                                                                                                                                                    |  |                                                                                                                                                                                                                                                                                                                                                                                                                                                                                                                                                                                      |                                                                                                                                                                                                                                                                                                                                         |
| <b>MONITORING SUBJECT</b>                                                   |                                                                                                                                                                                                                                                                                                                                                                                                              |                                                                                                                                                                                                                                                                    |  |                                                                                                                                                                                                                                                                                                                                                                                                                                                                                                                                                                                      |                                                                                                                                                                                                                                                                                                                                         |
| Description                                                                 | Research, Surveys training and knowledge transfer in the environmental sciences.<br>Countryside Survey 2007<br>Predatory Bird Monitoring Scheme, etc.<br>the Biological Records Centre<br>The Environmental Information Data Centre (EIDC): a.o. Hydrology of Soil Type maps                                                                                                                                 |                                                                                                                                                                                                                                                                    |  |                                                                                                                                                                                                                                                                                                                                                                                                                                                                                                                                                                                      |                                                                                                                                                                                                                                                                                                                                         |
| Protection goal(s) and/or influencing factor(s)                             | <input checked="" type="checkbox"/> Protection goal<br><br><input checked="" type="checkbox"/> Biodiversity: general<br><input type="checkbox"/> Human Health<br><input type="checkbox"/> Animal Health<br><input type="checkbox"/> Plant Health<br><input type="checkbox"/> Soil function<br><input type="checkbox"/> Water quality<br><input type="checkbox"/> Sustainable Agriculture                     | <input checked="" type="checkbox"/> Influencing factor<br><br><input type="checkbox"/> Agronomic practice<br><input type="checkbox"/> Plant protection<br><input type="checkbox"/> GMO cultivation<br><input checked="" type="checkbox"/> Environmental conditions |  |                                                                                                                                                                                                                                                                                                                                                                                                                                                                                                                                                                                      |                                                                                                                                                                                                                                                                                                                                         |
| Duplication of Farmer's questionnaire                                       | <input checked="" type="checkbox"/> No duplication<br><input type="checkbox"/> Partly duplication<br><input type="checkbox"/> Complete duplication                                                                                                                                                                                                                                                           |                                                                                                                                                                                                                                                                    |  |                                                                                                                                                                                                                                                                                                                                                                                                                                                                                                                                                                                      |                                                                                                                                                                                                                                                                                                                                         |
| <b>SPECIFICITY</b>                                                          |                                                                                                                                                                                                                                                                                                                                                                                                              |                                                                                                                                                                                                                                                                    |  |                                                                                                                                                                                                                                                                                                                                                                                                                                                                                                                                                                                      |                                                                                                                                                                                                                                                                                                                                         |
| Geography                                                                   | <input type="checkbox"/> EU -wide<br><br><input type="checkbox"/> Zone A – North<br><input type="checkbox"/> Denmark,<br><input type="checkbox"/> Estonia,<br><input type="checkbox"/> Latvia,<br><input type="checkbox"/> Lithuania,<br><input type="checkbox"/> Finland,<br><input type="checkbox"/> Sweden<br><br><input type="checkbox"/> Regional (specify)<br><input type="checkbox"/> Local (specify) |                                                                                                                                                                                                                                                                    |  | <input checked="" type="checkbox"/> Zone B – Centre:<br><input type="checkbox"/> Belgium,<br><input type="checkbox"/> Czech Republic<br><input type="checkbox"/> Germany,<br><input type="checkbox"/> Ireland,<br><input type="checkbox"/> Luxembourg,<br><input type="checkbox"/> Hungary,<br><input type="checkbox"/> Netherlands,<br><input type="checkbox"/> Austria,<br><input type="checkbox"/> Poland,<br><input type="checkbox"/> Romania,<br><input type="checkbox"/> Slovenia,<br><input type="checkbox"/> Slovakia,<br><input checked="" type="checkbox"/> United Kingdom | <input type="checkbox"/> Zone C – South<br><input type="checkbox"/> Bulgaria,<br><input type="checkbox"/> Greece,<br><input type="checkbox"/> Spain,<br><input type="checkbox"/> France,<br><input type="checkbox"/> Italy,<br><input type="checkbox"/> Cyprus,<br><input type="checkbox"/> Malta,<br><input type="checkbox"/> Portugal |
| Factors                                                                     | <input checked="" type="checkbox"/> Multiple species/items (specify): biodiversity in general<br><input type="checkbox"/> Single species/item (specify)                                                                                                                                                                                                                                                      |                                                                                                                                                                                                                                                                    |  |                                                                                                                                                                                                                                                                                                                                                                                                                                                                                                                                                                                      |                                                                                                                                                                                                                                                                                                                                         |



|                                                                                                                                                                                                                                                                                                                                                                                                                                                                                                                                                                                                               |                                                                                                                                                                                                                                                                                   |
|---------------------------------------------------------------------------------------------------------------------------------------------------------------------------------------------------------------------------------------------------------------------------------------------------------------------------------------------------------------------------------------------------------------------------------------------------------------------------------------------------------------------------------------------------------------------------------------------------------------|-----------------------------------------------------------------------------------------------------------------------------------------------------------------------------------------------------------------------------------------------------------------------------------|
| Crop                                                                                                                                                                                                                                                                                                                                                                                                                                                                                                                                                                                                          | <input checked="" type="checkbox"/> No specific crop(s)<br><input type="checkbox"/> Several crops (e.g. all cereals):<br><input type="checkbox"/> Single crop                                                                                                                     |
| Trait /treatment                                                                                                                                                                                                                                                                                                                                                                                                                                                                                                                                                                                              | <input checked="" type="checkbox"/> No specific traits/treatments<br><input type="checkbox"/> Several traits/treatments:<br><input type="checkbox"/> Single trait/treatment                                                                                                       |
| GMO                                                                                                                                                                                                                                                                                                                                                                                                                                                                                                                                                                                                           | <input checked="" type="checkbox"/> No GMO bias<br><input type="checkbox"/> GMO specific                                                                                                                                                                                          |
| <b>METHODOLOGY</b>                                                                                                                                                                                                                                                                                                                                                                                                                                                                                                                                                                                            |                                                                                                                                                                                                                                                                                   |
| Observations                                                                                                                                                                                                                                                                                                                                                                                                                                                                                                                                                                                                  | <input checked="" type="checkbox"/> Reported, verifiable methodology<br><input type="checkbox"/> Reported, unverifiable methodology<br><input type="checkbox"/> Unknown, unverifiable methodology                                                                                 |
| Frequency                                                                                                                                                                                                                                                                                                                                                                                                                                                                                                                                                                                                     | <input type="checkbox"/> > 1 time/year<br><input type="checkbox"/> 1 time/year:<br><input type="checkbox"/> < 1 time/year                                                                                                                                                         |
| Future                                                                                                                                                                                                                                                                                                                                                                                                                                                                                                                                                                                                        | <input checked="" type="checkbox"/> For ≥ 5 years<br><input type="checkbox"/> between 1 and 5 years<br><input type="checkbox"/> no prospect                                                                                                                                       |
| Quality of performers                                                                                                                                                                                                                                                                                                                                                                                                                                                                                                                                                                                         | <input checked="" type="checkbox"/> Trained, professionals<br><input checked="" type="checkbox"/> Trained, non-professionals – volunteers<br><input type="checkbox"/> Uncertain or not -specified                                                                                 |
| Quality of data                                                                                                                                                                                                                                                                                                                                                                                                                                                                                                                                                                                               | <input checked="" type="checkbox"/> Standard recording of raw data<br><input type="checkbox"/> Free recording of raw data<br><input type="checkbox"/> Anecdotic                                                                                                                   |
| Analysis                                                                                                                                                                                                                                                                                                                                                                                                                                                                                                                                                                                                      | <input checked="" type="checkbox"/> Reported, verifiable methodology<br><input type="checkbox"/> Reported, unverifiable methodology<br><input type="checkbox"/> Unknown, unverifiable methodology                                                                                 |
| Quality of analysis                                                                                                                                                                                                                                                                                                                                                                                                                                                                                                                                                                                           | <input checked="" type="checkbox"/> Scientifically based<br><input type="checkbox"/> Indicative only<br><input type="checkbox"/> Unknown                                                                                                                                          |
| <b>REPORTING</b>                                                                                                                                                                                                                                                                                                                                                                                                                                                                                                                                                                                              |                                                                                                                                                                                                                                                                                   |
| Language                                                                                                                                                                                                                                                                                                                                                                                                                                                                                                                                                                                                      | Specify reporting language(s): English                                                                                                                                                                                                                                            |
| Availability                                                                                                                                                                                                                                                                                                                                                                                                                                                                                                                                                                                                  | <input type="checkbox"/> Scientific publication<br><input checked="" type="checkbox"/> Official report available on the internet or in other public forum<br><input checked="" type="checkbox"/> Official report available from network<br><input type="checkbox"/> Not available |
| Frequency                                                                                                                                                                                                                                                                                                                                                                                                                                                                                                                                                                                                     | <input checked="" type="checkbox"/> ≥ 1 time/year –<br><input type="checkbox"/> < 1 time/year –                                                                                                                                                                                   |
| Historical reference                                                                                                                                                                                                                                                                                                                                                                                                                                                                                                                                                                                          | <input checked="" type="checkbox"/> over ≥ 5 years<br><input type="checkbox"/> between 1 and 5 years<br><input type="checkbox"/> no historical analysis                                                                                                                           |
| <b>COMMENT(S)</b>                                                                                                                                                                                                                                                                                                                                                                                                                                                                                                                                                                                             |                                                                                                                                                                                                                                                                                   |
| <p>Priority to research, monitoring embedded in research projects. Countryside Survey 2007 (also about farmland) and companion reports (<a href="http://www.countrysidesurvey.org.uk">www.countrysidesurvey.org.uk</a>). Reports on status and trends of populations of an array of species, maps, databases, atlases, books via the Biological Records Centre website (<a href="http://www.brc.ac.uk/default.htm">http://www.brc.ac.uk/default.htm</a>) and other data via EIDC (<a href="http://192.171.153.213/sci_programmes/env_info.html">http://192.171.153.213/sci_programmes/env_info.html</a>).</p> |                                                                                                                                                                                                                                                                                   |

## GSEN-09-0180.00.1 GB – Butterfly Monitoring Scheme

| EuropaBio's coordinated approach to General Surveillance: Existing Networks |                                                                                                                                                                                                                                                                                                                                                                                                                                                                                                                                                                                      |                                                                                                                                                                                                                                                                                                                                         |  |
|-----------------------------------------------------------------------------|--------------------------------------------------------------------------------------------------------------------------------------------------------------------------------------------------------------------------------------------------------------------------------------------------------------------------------------------------------------------------------------------------------------------------------------------------------------------------------------------------------------------------------------------------------------------------------------|-----------------------------------------------------------------------------------------------------------------------------------------------------------------------------------------------------------------------------------------------------------------------------------------------------------------------------------------|--|
| ORGANISATION                                                                |                                                                                                                                                                                                                                                                                                                                                                                                                                                                                                                                                                                      |                                                                                                                                                                                                                                                                                                                                         |  |
| EuropaBio reference                                                         | GS-EN-09-0180                                                                                                                                                                                                                                                                                                                                                                                                                                                                                                                                                                        |                                                                                                                                                                                                                                                                                                                                         |  |
| Official name of the Network                                                | <b>The UK Butterfly Monitoring Scheme</b>                                                                                                                                                                                                                                                                                                                                                                                                                                                                                                                                            |                                                                                                                                                                                                                                                                                                                                         |  |
| Other names                                                                 |                                                                                                                                                                                                                                                                                                                                                                                                                                                                                                                                                                                      |                                                                                                                                                                                                                                                                                                                                         |  |
| Type of organisation                                                        | Nature conservation<br>Founded 1976                                                                                                                                                                                                                                                                                                                                                                                                                                                                                                                                                  |                                                                                                                                                                                                                                                                                                                                         |  |
| Coordinates                                                                 | Butterfly Conservation<br>Manor Yard<br>East Lulworth<br>Wareham<br>Dorset BH20 5QP<br><br>Fax: 01929 400210<br>Email: transect[at]butterfly-conservation.org<br>Email: info[at]butterfly-conservation.org                                                                                                                                                                                                                                                                                                                                                                           |                                                                                                                                                                                                                                                                                                                                         |  |
| Website                                                                     | <a href="http://www.ukbms.org">http://www.ukbms.org</a>                                                                                                                                                                                                                                                                                                                                                                                                                                                                                                                              |                                                                                                                                                                                                                                                                                                                                         |  |
| Funding                                                                     | Run as a partnership between the Centre for Ecology and Hydrology (CEH), Butterfly Conservation (BC) and the Joint Nature Conservation Committee (JNCC).<br>funding by a multi-agency consortium led by Defra, and including the Countryside Council for Wales (CCW), Natural England (NE), Environment and Heritage Service (EHS), Forestry Commission (FC), Scottish Executive Environment and Rural Affairs Department (SEERAD), and Scottish Natural Heritage (SNH)                                                                                                              |                                                                                                                                                                                                                                                                                                                                         |  |
| Conflict of interest                                                        | -                                                                                                                                                                                                                                                                                                                                                                                                                                                                                                                                                                                    |                                                                                                                                                                                                                                                                                                                                         |  |
| Part of other network(s)                                                    |                                                                                                                                                                                                                                                                                                                                                                                                                                                                                                                                                                                      |                                                                                                                                                                                                                                                                                                                                         |  |
| Grouping other network(s)                                                   | The UKBMS consists of a network of sites throughout the UK, covering 71 species. Cooperation project merger of the long-running Butterfly Monitoring Scheme (BMS; started 1976) with Butterfly Conservation's co-ordination of 'independent' transects                                                                                                                                                                                                                                                                                                                               |                                                                                                                                                                                                                                                                                                                                         |  |
| MONITORING SUBJECT                                                          |                                                                                                                                                                                                                                                                                                                                                                                                                                                                                                                                                                                      |                                                                                                                                                                                                                                                                                                                                         |  |
| Description                                                                 | Butterflies are monitored as indicators of the state of the environment, allowing to assess the impacts of climate change and the progress of government policy initiatives.                                                                                                                                                                                                                                                                                                                                                                                                         |                                                                                                                                                                                                                                                                                                                                         |  |
| Protection goal(s) and/or influencing factor(s)                             | <input checked="" type="checkbox"/> Protection goal<br><br><input checked="" type="checkbox"/> Biodiversity: butterflies<br><input type="checkbox"/> Human Health<br><input type="checkbox"/> Animal Health<br><input type="checkbox"/> Plant Health<br><input type="checkbox"/> Soil function<br><input type="checkbox"/> Water quality<br><input type="checkbox"/> Sustainable Agriculture                                                                                                                                                                                         | <input type="checkbox"/> Influencing factor<br><br><input type="checkbox"/> Agronomic practice<br><input type="checkbox"/> Plant protection<br><input type="checkbox"/> GMO cultivation<br><input type="checkbox"/> Environmental conditions                                                                                            |  |
| Duplication of Farmer's questionnaire                                       | <input checked="" type="checkbox"/> No duplication<br><input type="checkbox"/> Partly duplication<br><input type="checkbox"/> Complete duplication                                                                                                                                                                                                                                                                                                                                                                                                                                   |                                                                                                                                                                                                                                                                                                                                         |  |
| SPECIFICITY                                                                 |                                                                                                                                                                                                                                                                                                                                                                                                                                                                                                                                                                                      |                                                                                                                                                                                                                                                                                                                                         |  |
| Geography                                                                   | <input type="checkbox"/> EU -wide<br><br><input type="checkbox"/> Zone A – North<br><input type="checkbox"/> Denmark,<br><input type="checkbox"/> Estonia,<br><input type="checkbox"/> Latvia,<br><input type="checkbox"/> Lithuania,<br><input type="checkbox"/> Finland,<br><input type="checkbox"/> Sweden                                                                                                                                                                                                                                                                        |                                                                                                                                                                                                                                                                                                                                         |  |
|                                                                             | <input checked="" type="checkbox"/> Zone B – Centre:<br><input type="checkbox"/> Belgium,<br><input type="checkbox"/> Czech Republic<br><input type="checkbox"/> Germany,<br><input type="checkbox"/> Ireland,<br><input type="checkbox"/> Luxembourg,<br><input type="checkbox"/> Hungary,<br><input type="checkbox"/> Netherlands,<br><input type="checkbox"/> Austria,<br><input type="checkbox"/> Poland,<br><input type="checkbox"/> Romania,<br><input type="checkbox"/> Slovenia,<br><input type="checkbox"/> Slovakia,<br><input checked="" type="checkbox"/> United Kingdom | <input type="checkbox"/> Zone C – South<br><input type="checkbox"/> Bulgaria,<br><input type="checkbox"/> Greece,<br><input type="checkbox"/> Spain,<br><input type="checkbox"/> France,<br><input type="checkbox"/> Italy,<br><input type="checkbox"/> Cyprus,<br><input type="checkbox"/> Malta,<br><input type="checkbox"/> Portugal |  |
|                                                                             | <input type="checkbox"/> Regional (specify)<br><input type="checkbox"/> Local (specify)                                                                                                                                                                                                                                                                                                                                                                                                                                                                                              |                                                                                                                                                                                                                                                                                                                                         |  |
| Factors                                                                     | <input checked="" type="checkbox"/> Multiple species/items (specify): butterflies<br><input type="checkbox"/> Single species/item (specify)                                                                                                                                                                                                                                                                                                                                                                                                                                          |                                                                                                                                                                                                                                                                                                                                         |  |

|                                                                                                                                                                                                                                                                                                          |                                                                                                                                                                                                                                                                                              |
|----------------------------------------------------------------------------------------------------------------------------------------------------------------------------------------------------------------------------------------------------------------------------------------------------------|----------------------------------------------------------------------------------------------------------------------------------------------------------------------------------------------------------------------------------------------------------------------------------------------|
| Crop                                                                                                                                                                                                                                                                                                     | <input checked="" type="checkbox"/> No specific crop(s)<br><input type="checkbox"/> Several crops (e.g. all cereals):<br><input type="checkbox"/> Single crop                                                                                                                                |
| Trait /treatment                                                                                                                                                                                                                                                                                         | <input checked="" type="checkbox"/> No specific traits/treatments<br><input type="checkbox"/> Several traits/treatments:<br><input type="checkbox"/> Single trait/treatment                                                                                                                  |
| GMO                                                                                                                                                                                                                                                                                                      | <input checked="" type="checkbox"/> No GMO bias<br><input type="checkbox"/> GMO specific                                                                                                                                                                                                     |
| <b>METHODOLOGY</b>                                                                                                                                                                                                                                                                                       |                                                                                                                                                                                                                                                                                              |
| Observations                                                                                                                                                                                                                                                                                             | <input checked="" type="checkbox"/> Reported, verifiable methodology<br><input type="checkbox"/> Reported, unverifiable methodology<br><input type="checkbox"/> Unknown, unverifiable methodology                                                                                            |
| Frequency                                                                                                                                                                                                                                                                                                | <input checked="" type="checkbox"/> > 1 time/year<br><input type="checkbox"/> 1 time/year:<br><input type="checkbox"/> < 1 time/year                                                                                                                                                         |
| Future                                                                                                                                                                                                                                                                                                   | <input checked="" type="checkbox"/> For $\geq$ 5 years<br><input type="checkbox"/> between 1 and 5 years<br><input type="checkbox"/> no prospect                                                                                                                                             |
| Quality of performers                                                                                                                                                                                                                                                                                    | <input type="checkbox"/> Trained, professionals<br><input checked="" type="checkbox"/> Trained, non-professionals – volunteers<br><input type="checkbox"/> Uncertain or not -specified                                                                                                       |
| Quality of data                                                                                                                                                                                                                                                                                          | <input checked="" type="checkbox"/> Standard recording of raw data<br><input type="checkbox"/> Free recording of raw data<br><input type="checkbox"/> Anecdotic                                                                                                                              |
| Analysis                                                                                                                                                                                                                                                                                                 | <input checked="" type="checkbox"/> Reported, verifiable methodology<br><input type="checkbox"/> Reported, unverifiable methodology<br><input type="checkbox"/> Unknown, unverifiable methodology                                                                                            |
| Quality of analysis                                                                                                                                                                                                                                                                                      | <input checked="" type="checkbox"/> Scientifically based<br><input type="checkbox"/> Indicative only<br><input type="checkbox"/> Unknown                                                                                                                                                     |
| <b>REPORTING</b>                                                                                                                                                                                                                                                                                         |                                                                                                                                                                                                                                                                                              |
| Language                                                                                                                                                                                                                                                                                                 | Specify reporting language(s): English                                                                                                                                                                                                                                                       |
| Availability                                                                                                                                                                                                                                                                                             | <input checked="" type="checkbox"/> Scientific publication<br><input checked="" type="checkbox"/> Official report available on the internet or in other public forum<br><input checked="" type="checkbox"/> Official report available from network<br><input type="checkbox"/> Not available |
| Frequency                                                                                                                                                                                                                                                                                                | <input checked="" type="checkbox"/> $\geq$ 1 time/year –<br><input type="checkbox"/> < 1 time/year –                                                                                                                                                                                         |
| Historical reference                                                                                                                                                                                                                                                                                     | <input checked="" type="checkbox"/> over $\geq$ 5 years<br><input type="checkbox"/> between 1 and 5 years<br><input type="checkbox"/> no historical analysis                                                                                                                                 |
| <b>COMMENT(S)</b>                                                                                                                                                                                                                                                                                        |                                                                                                                                                                                                                                                                                              |
| Monitoring network using selected species as representative environmental indicators. Annual reports, books, scientific papers. Database: per species: short-term fluctuations and long-term trends in butterfly abundance, both at particular sites and more generally at a regional or national levels |                                                                                                                                                                                                                                                                                              |

## GSEN-09-0181.00.1 GB – Environment Agency

| EuropaBio's coordinated approach to General Surveillance: Existing Networks |                                                                                                                                                                                                                                                                                                                                                                              |                                                                                                                                                                                                                                                                                                                                                                                                                                                                                                                              |                                                                                                                                                                                                                                                                                              |
|-----------------------------------------------------------------------------|------------------------------------------------------------------------------------------------------------------------------------------------------------------------------------------------------------------------------------------------------------------------------------------------------------------------------------------------------------------------------|------------------------------------------------------------------------------------------------------------------------------------------------------------------------------------------------------------------------------------------------------------------------------------------------------------------------------------------------------------------------------------------------------------------------------------------------------------------------------------------------------------------------------|----------------------------------------------------------------------------------------------------------------------------------------------------------------------------------------------------------------------------------------------------------------------------------------------|
| <b>ORGANISATION</b>                                                         |                                                                                                                                                                                                                                                                                                                                                                              |                                                                                                                                                                                                                                                                                                                                                                                                                                                                                                                              |                                                                                                                                                                                                                                                                                              |
| EuropaBio reference                                                         | GS-EN-09-0181                                                                                                                                                                                                                                                                                                                                                                |                                                                                                                                                                                                                                                                                                                                                                                                                                                                                                                              |                                                                                                                                                                                                                                                                                              |
| Official name of the Network                                                | Environment Agency                                                                                                                                                                                                                                                                                                                                                           |                                                                                                                                                                                                                                                                                                                                                                                                                                                                                                                              |                                                                                                                                                                                                                                                                                              |
| Other names                                                                 |                                                                                                                                                                                                                                                                                                                                                                              |                                                                                                                                                                                                                                                                                                                                                                                                                                                                                                                              |                                                                                                                                                                                                                                                                                              |
| Type of organisation                                                        | Governmental<br>Founded (unknown)                                                                                                                                                                                                                                                                                                                                            |                                                                                                                                                                                                                                                                                                                                                                                                                                                                                                                              |                                                                                                                                                                                                                                                                                              |
| Coordinates                                                                 | National Customer Contact Centre<br>PO Box 544<br>Rotherham<br>S60 1BY<br><br>Email: enquiries[at]environment-agency.gov.uk                                                                                                                                                                                                                                                  |                                                                                                                                                                                                                                                                                                                                                                                                                                                                                                                              |                                                                                                                                                                                                                                                                                              |
| Website                                                                     | <a href="http://www.environment-agency.gov.uk/">http://www.environment-agency.gov.uk/</a>                                                                                                                                                                                                                                                                                    |                                                                                                                                                                                                                                                                                                                                                                                                                                                                                                                              |                                                                                                                                                                                                                                                                                              |
| Funding                                                                     | Public<br>around 60% from government, and most of the rest comes from various charges schemes.                                                                                                                                                                                                                                                                               |                                                                                                                                                                                                                                                                                                                                                                                                                                                                                                                              |                                                                                                                                                                                                                                                                                              |
| Conflict of interest                                                        |                                                                                                                                                                                                                                                                                                                                                                              |                                                                                                                                                                                                                                                                                                                                                                                                                                                                                                                              |                                                                                                                                                                                                                                                                                              |
| Part of other network(s)                                                    |                                                                                                                                                                                                                                                                                                                                                                              |                                                                                                                                                                                                                                                                                                                                                                                                                                                                                                                              |                                                                                                                                                                                                                                                                                              |
| Grouping other network(s)                                                   | Regional and area offices. Executive Non-departmental Public Body responsible to the Secretary of State for Environment, Food and Rural Affairs and Assembly Sponsored Public Body responsible to the National Assembly for Wales.                                                                                                                                           |                                                                                                                                                                                                                                                                                                                                                                                                                                                                                                                              |                                                                                                                                                                                                                                                                                              |
| <b>MONITORING SUBJECT</b>                                                   |                                                                                                                                                                                                                                                                                                                                                                              |                                                                                                                                                                                                                                                                                                                                                                                                                                                                                                                              |                                                                                                                                                                                                                                                                                              |
| Description                                                                 | The aim is to protect and improve the environment, and to promote sustainable development. Monitoring water and broader environmental conditions (air, water, soil, waste, wildlife, climate change...)<br>Concentrates on pollution.                                                                                                                                        |                                                                                                                                                                                                                                                                                                                                                                                                                                                                                                                              |                                                                                                                                                                                                                                                                                              |
| Protection goal(s) and/or influencing factor(s)                             | <input checked="" type="checkbox"/> Protection goal<br><input type="checkbox"/> Biodiversity:<br><input type="checkbox"/> Human Health<br><input type="checkbox"/> Animal Health<br><input type="checkbox"/> Plant Health<br><input type="checkbox"/> Soil function<br><input checked="" type="checkbox"/> Water quality<br><input type="checkbox"/> Sustainable Agriculture | <input checked="" type="checkbox"/> Influencing factor<br><input type="checkbox"/> Agronomic practice<br><input type="checkbox"/> Plant protection<br><input type="checkbox"/> GMO cultivation<br><input checked="" type="checkbox"/> Environmental conditions                                                                                                                                                                                                                                                               |                                                                                                                                                                                                                                                                                              |
| Duplication of Farmer's questionnaire                                       | <input checked="" type="checkbox"/> No duplication<br><input type="checkbox"/> Partly duplication<br><input type="checkbox"/> Complete duplication                                                                                                                                                                                                                           |                                                                                                                                                                                                                                                                                                                                                                                                                                                                                                                              |                                                                                                                                                                                                                                                                                              |
| <b>SPECIFICITY</b>                                                          |                                                                                                                                                                                                                                                                                                                                                                              |                                                                                                                                                                                                                                                                                                                                                                                                                                                                                                                              |                                                                                                                                                                                                                                                                                              |
| Geography                                                                   | <input type="checkbox"/> EU -wide<br><input type="checkbox"/> Zone A – North<br><input checked="" type="checkbox"/> Zone B – Centre:<br><input type="checkbox"/> Zone C – South                                                                                                                                                                                              |                                                                                                                                                                                                                                                                                                                                                                                                                                                                                                                              |                                                                                                                                                                                                                                                                                              |
|                                                                             | <input type="checkbox"/> Denmark,<br><input type="checkbox"/> Estonia,<br><input type="checkbox"/> Latvia,<br><input type="checkbox"/> Lithuania,<br><input type="checkbox"/> Finland,<br><input type="checkbox"/> Sweden                                                                                                                                                    | <input type="checkbox"/> Belgium,<br><input type="checkbox"/> Czech Republic<br><input type="checkbox"/> Germany,<br><input type="checkbox"/> Ireland,<br><input type="checkbox"/> Luxembourg,<br><input type="checkbox"/> Hungary,<br><input type="checkbox"/> Netherlands,<br><input type="checkbox"/> Austria,<br><input type="checkbox"/> Poland,<br><input type="checkbox"/> Romania,<br><input type="checkbox"/> Slovenia,<br><input type="checkbox"/> Slovakia,<br><input checked="" type="checkbox"/> United Kingdom | <input type="checkbox"/> Bulgaria,<br><input type="checkbox"/> Greece,<br><input type="checkbox"/> Spain,<br><input type="checkbox"/> France,<br><input type="checkbox"/> Italy,<br><input type="checkbox"/> Cyprus,<br><input type="checkbox"/> Malta,<br><input type="checkbox"/> Portugal |
|                                                                             | <input checked="" type="checkbox"/> Regional (specify): England and Wales<br><input type="checkbox"/> Local (specify)                                                                                                                                                                                                                                                        |                                                                                                                                                                                                                                                                                                                                                                                                                                                                                                                              |                                                                                                                                                                                                                                                                                              |
| Factors                                                                     | <input checked="" type="checkbox"/> Multiple species/items (specify): environment<br><input type="checkbox"/> Single species/item (specify)                                                                                                                                                                                                                                  |                                                                                                                                                                                                                                                                                                                                                                                                                                                                                                                              |                                                                                                                                                                                                                                                                                              |
| Crop                                                                        | <input checked="" type="checkbox"/> No specific crop(s)<br><input type="checkbox"/> Several crops (e.g. all cereals):<br><input type="checkbox"/> Single crop                                                                                                                                                                                                                |                                                                                                                                                                                                                                                                                                                                                                                                                                                                                                                              |                                                                                                                                                                                                                                                                                              |
| Trait /treatment                                                            | <input checked="" type="checkbox"/> No specific traits/treatments<br><input type="checkbox"/> Several traits/treatments:                                                                                                                                                                                                                                                     |                                                                                                                                                                                                                                                                                                                                                                                                                                                                                                                              |                                                                                                                                                                                                                                                                                              |

|                                                                                                                                                                                                                                                                                                                                                                                                                                                                                                                            |                                                                                                                                                                                                                                                                        |
|----------------------------------------------------------------------------------------------------------------------------------------------------------------------------------------------------------------------------------------------------------------------------------------------------------------------------------------------------------------------------------------------------------------------------------------------------------------------------------------------------------------------------|------------------------------------------------------------------------------------------------------------------------------------------------------------------------------------------------------------------------------------------------------------------------|
|                                                                                                                                                                                                                                                                                                                                                                                                                                                                                                                            | <input type="checkbox"/> Single trait/treatment                                                                                                                                                                                                                        |
| GMO                                                                                                                                                                                                                                                                                                                                                                                                                                                                                                                        | <input checked="" type="checkbox"/> No GMO bias<br><input type="checkbox"/> GMO specific                                                                                                                                                                               |
| <b>METHODOLOGY</b>                                                                                                                                                                                                                                                                                                                                                                                                                                                                                                         |                                                                                                                                                                                                                                                                        |
| Observations                                                                                                                                                                                                                                                                                                                                                                                                                                                                                                               | <input type="checkbox"/> Reported, verifiable methodology<br><input type="checkbox"/> Reported, unverifiable methodology<br><input type="checkbox"/> Unknown, unverifiable methodology                                                                                 |
| Frequency                                                                                                                                                                                                                                                                                                                                                                                                                                                                                                                  | <input type="checkbox"/> > 1 time/year<br><input type="checkbox"/> 1 time/year:<br><input type="checkbox"/> < 1 time/year                                                                                                                                              |
| Future                                                                                                                                                                                                                                                                                                                                                                                                                                                                                                                     | <input type="checkbox"/> For ≥ 5 years<br><input type="checkbox"/> between 1 and 5 years<br><input type="checkbox"/> no prospect                                                                                                                                       |
| Quality of performers                                                                                                                                                                                                                                                                                                                                                                                                                                                                                                      | <input checked="" type="checkbox"/> Trained, professionals<br><input type="checkbox"/> Trained, non-professionals – volunteers<br><input type="checkbox"/> Uncertain or not -specified                                                                                 |
| Quality of data                                                                                                                                                                                                                                                                                                                                                                                                                                                                                                            | <input type="checkbox"/> Standard recording of raw data<br><input type="checkbox"/> Free recording of raw data<br><input type="checkbox"/> Anecdotic                                                                                                                   |
| Analysis                                                                                                                                                                                                                                                                                                                                                                                                                                                                                                                   | <input type="checkbox"/> Reported, verifiable methodology<br><input type="checkbox"/> Reported, unverifiable methodology<br><input type="checkbox"/> Unknown, unverifiable methodology                                                                                 |
| Quality of analysis                                                                                                                                                                                                                                                                                                                                                                                                                                                                                                        | <input checked="" type="checkbox"/> Scientifically based<br><input type="checkbox"/> Indicative only<br><input type="checkbox"/> Unknown                                                                                                                               |
| <b>REPORTING</b>                                                                                                                                                                                                                                                                                                                                                                                                                                                                                                           |                                                                                                                                                                                                                                                                        |
| Language                                                                                                                                                                                                                                                                                                                                                                                                                                                                                                                   | Specify reporting language(s): English                                                                                                                                                                                                                                 |
| Availability                                                                                                                                                                                                                                                                                                                                                                                                                                                                                                               | <input type="checkbox"/> Scientific publication<br><input checked="" type="checkbox"/> Official report available on the internet or in other public forum<br><input type="checkbox"/> Official report available from network<br><input type="checkbox"/> Not available |
| Frequency                                                                                                                                                                                                                                                                                                                                                                                                                                                                                                                  | <input checked="" type="checkbox"/> ≥ 1 time/year –<br><input type="checkbox"/> < 1 time/year –                                                                                                                                                                        |
| Historical reference                                                                                                                                                                                                                                                                                                                                                                                                                                                                                                       | <input checked="" type="checkbox"/> over ≥ 5 years<br><input type="checkbox"/> between 1 and 5 years<br><input type="checkbox"/> no historical analysis                                                                                                                |
| <b>COMMENT(S)</b>                                                                                                                                                                                                                                                                                                                                                                                                                                                                                                          |                                                                                                                                                                                                                                                                        |
| 'current status of water resources', monthly water situation report and weekly rainfall and river flow summary ( <a href="http://www.environment-agency.gov.uk/research/library/publications/33981.aspx">http://www.environment-agency.gov.uk/research/library/publications/33981.aspx</a> ). Reports on State of the Environment per region ( <a href="http://www.environment-agency.gov.uk/research/library/publications/34019.aspx">http://www.environment-agency.gov.uk/research/library/publications/34019.aspx</a> ) |                                                                                                                                                                                                                                                                        |

## GSEN-09-0182.00.1 GB – National Biodiversity Network

| EuropaBio's coordinated approach to General Surveillance: Existing Networks |                                                                                                                                                                                                                                                                                                                                                                                                                                                                                                                                                                                                                                                        |                                                                                                                                                                                                                                                                                                                                                                                                                                                                                                                              |                                                                                                                                                                                                                                                                                              |
|-----------------------------------------------------------------------------|--------------------------------------------------------------------------------------------------------------------------------------------------------------------------------------------------------------------------------------------------------------------------------------------------------------------------------------------------------------------------------------------------------------------------------------------------------------------------------------------------------------------------------------------------------------------------------------------------------------------------------------------------------|------------------------------------------------------------------------------------------------------------------------------------------------------------------------------------------------------------------------------------------------------------------------------------------------------------------------------------------------------------------------------------------------------------------------------------------------------------------------------------------------------------------------------|----------------------------------------------------------------------------------------------------------------------------------------------------------------------------------------------------------------------------------------------------------------------------------------------|
| <b>ORGANISATION</b>                                                         |                                                                                                                                                                                                                                                                                                                                                                                                                                                                                                                                                                                                                                                        |                                                                                                                                                                                                                                                                                                                                                                                                                                                                                                                              |                                                                                                                                                                                                                                                                                              |
| EuropaBio reference                                                         | GS-EN-09-0182                                                                                                                                                                                                                                                                                                                                                                                                                                                                                                                                                                                                                                          |                                                                                                                                                                                                                                                                                                                                                                                                                                                                                                                              |                                                                                                                                                                                                                                                                                              |
| Official name of the Network                                                | <b>National Biodiversity Network</b>                                                                                                                                                                                                                                                                                                                                                                                                                                                                                                                                                                                                                   |                                                                                                                                                                                                                                                                                                                                                                                                                                                                                                                              |                                                                                                                                                                                                                                                                                              |
| Other names                                                                 | NBN trust                                                                                                                                                                                                                                                                                                                                                                                                                                                                                                                                                                                                                                              |                                                                                                                                                                                                                                                                                                                                                                                                                                                                                                                              |                                                                                                                                                                                                                                                                                              |
| Type of organisation                                                        | Nature conservation<br>Founded 2000                                                                                                                                                                                                                                                                                                                                                                                                                                                                                                                                                                                                                    |                                                                                                                                                                                                                                                                                                                                                                                                                                                                                                                              |                                                                                                                                                                                                                                                                                              |
| Coordinates                                                                 | 3-5 High Pavement<br>The Lace Market<br>Nottingham<br>NG1 1HF<br><br>Email: support[at]nbn.org.uk                                                                                                                                                                                                                                                                                                                                                                                                                                                                                                                                                      |                                                                                                                                                                                                                                                                                                                                                                                                                                                                                                                              |                                                                                                                                                                                                                                                                                              |
| Website                                                                     | <a href="http://www.nbn.org.uk/#">http://www.nbn.org.uk/#</a>                                                                                                                                                                                                                                                                                                                                                                                                                                                                                                                                                                                          |                                                                                                                                                                                                                                                                                                                                                                                                                                                                                                                              |                                                                                                                                                                                                                                                                                              |
| Funding                                                                     | DEFRA, full members,<br>Associate members (organisations and individuals), donations                                                                                                                                                                                                                                                                                                                                                                                                                                                                                                                                                                   |                                                                                                                                                                                                                                                                                                                                                                                                                                                                                                                              |                                                                                                                                                                                                                                                                                              |
| Conflict of interest                                                        | -                                                                                                                                                                                                                                                                                                                                                                                                                                                                                                                                                                                                                                                      |                                                                                                                                                                                                                                                                                                                                                                                                                                                                                                                              |                                                                                                                                                                                                                                                                                              |
| Part of other network(s)                                                    |                                                                                                                                                                                                                                                                                                                                                                                                                                                                                                                                                                                                                                                        |                                                                                                                                                                                                                                                                                                                                                                                                                                                                                                                              |                                                                                                                                                                                                                                                                                              |
| Grouping other network(s)                                                   | Full members of the trust: <ul style="list-style-type: none"> <li>- Scottish Natural Heritage</li> <li>- Scottish Environment Protection Agency</li> <li>- Natural England</li> <li>- Environment Agency</li> <li>- Countryside Council for Wales</li> <li>- The Natural History Museum</li> <li>- Joint Nature Conservation Committee</li> <li>- Natural Environment Research Council/ Centre for Ecology and Hydrology</li> <li>- Marine Biological Association</li> <li>- Freshwater Biological Association</li> <li>- The Wildlife Trusts</li> <li>- National Federation for Biological Recording</li> <li>- British Ecological Society</li> </ul> |                                                                                                                                                                                                                                                                                                                                                                                                                                                                                                                              |                                                                                                                                                                                                                                                                                              |
| <b>MONITORING SUBJECT</b>                                                   |                                                                                                                                                                                                                                                                                                                                                                                                                                                                                                                                                                                                                                                        |                                                                                                                                                                                                                                                                                                                                                                                                                                                                                                                              |                                                                                                                                                                                                                                                                                              |
| Description                                                                 | "Data warehouse" for biodiversity information.<br>Collecting data from member organisations<br>Available for everyone                                                                                                                                                                                                                                                                                                                                                                                                                                                                                                                                  |                                                                                                                                                                                                                                                                                                                                                                                                                                                                                                                              |                                                                                                                                                                                                                                                                                              |
| Protection goal(s) and/or influencing factor(s)                             | <input checked="" type="checkbox"/> Protection goal                                                                                                                                                                                                                                                                                                                                                                                                                                                                                                                                                                                                    | <input type="checkbox"/> Influencing factor                                                                                                                                                                                                                                                                                                                                                                                                                                                                                  |                                                                                                                                                                                                                                                                                              |
|                                                                             | <input checked="" type="checkbox"/> Biodiversity: general<br><input type="checkbox"/> Human Health<br><input type="checkbox"/> Animal Health<br><input type="checkbox"/> Plant Health<br><input type="checkbox"/> Soil function<br><input type="checkbox"/> Water quality<br><input type="checkbox"/> Sustainable Agriculture                                                                                                                                                                                                                                                                                                                          | <input type="checkbox"/> Agronomic practice<br><input type="checkbox"/> Plant protection<br><input type="checkbox"/> GMO cultivation<br><input type="checkbox"/> Environmental conditions                                                                                                                                                                                                                                                                                                                                    |                                                                                                                                                                                                                                                                                              |
| Duplication of Farmer's questionnaire                                       | <input checked="" type="checkbox"/> No duplication<br><input type="checkbox"/> Partly duplication<br><input type="checkbox"/> Complete duplication                                                                                                                                                                                                                                                                                                                                                                                                                                                                                                     |                                                                                                                                                                                                                                                                                                                                                                                                                                                                                                                              |                                                                                                                                                                                                                                                                                              |
| <b>SPECIFICITY</b>                                                          |                                                                                                                                                                                                                                                                                                                                                                                                                                                                                                                                                                                                                                                        |                                                                                                                                                                                                                                                                                                                                                                                                                                                                                                                              |                                                                                                                                                                                                                                                                                              |
| Geography                                                                   | <input type="checkbox"/> EU -wide                                                                                                                                                                                                                                                                                                                                                                                                                                                                                                                                                                                                                      |                                                                                                                                                                                                                                                                                                                                                                                                                                                                                                                              |                                                                                                                                                                                                                                                                                              |
|                                                                             | <input type="checkbox"/> Zone A – North                                                                                                                                                                                                                                                                                                                                                                                                                                                                                                                                                                                                                | <input checked="" type="checkbox"/> Zone B – Centre:                                                                                                                                                                                                                                                                                                                                                                                                                                                                         | <input type="checkbox"/> Zone C – South                                                                                                                                                                                                                                                      |
|                                                                             | <input type="checkbox"/> Denmark,<br><input type="checkbox"/> Estonia,<br><input type="checkbox"/> Latvia,<br><input type="checkbox"/> Lithuania,<br><input type="checkbox"/> Finland,<br><input type="checkbox"/> Sweden                                                                                                                                                                                                                                                                                                                                                                                                                              | <input type="checkbox"/> Belgium,<br><input type="checkbox"/> Czech Republic<br><input type="checkbox"/> Germany,<br><input type="checkbox"/> Ireland,<br><input type="checkbox"/> Luxembourg,<br><input type="checkbox"/> Hungary,<br><input type="checkbox"/> Netherlands,<br><input type="checkbox"/> Austria,<br><input type="checkbox"/> Poland,<br><input type="checkbox"/> Romania,<br><input type="checkbox"/> Slovenia,<br><input type="checkbox"/> Slovakia,<br><input checked="" type="checkbox"/> United Kingdom | <input type="checkbox"/> Bulgaria,<br><input type="checkbox"/> Greece,<br><input type="checkbox"/> Spain,<br><input type="checkbox"/> France,<br><input type="checkbox"/> Italy,<br><input type="checkbox"/> Cyprus,<br><input type="checkbox"/> Malta,<br><input type="checkbox"/> Portugal |

|                                                                                                                                                                                                                                                                                                                   |                                                                                                                                                                                                                                                                        |
|-------------------------------------------------------------------------------------------------------------------------------------------------------------------------------------------------------------------------------------------------------------------------------------------------------------------|------------------------------------------------------------------------------------------------------------------------------------------------------------------------------------------------------------------------------------------------------------------------|
|                                                                                                                                                                                                                                                                                                                   | <input type="checkbox"/> Regional (specify)<br><input type="checkbox"/> Local (specify)                                                                                                                                                                                |
| Factors                                                                                                                                                                                                                                                                                                           | <input checked="" type="checkbox"/> Multiple species/items (specify): biodiversity in general<br><input type="checkbox"/> Single species/item (specify)                                                                                                                |
| Crop                                                                                                                                                                                                                                                                                                              | <input checked="" type="checkbox"/> No specific crop(s)<br><input type="checkbox"/> Several crops (e.g. all cereals):<br><input type="checkbox"/> Single crop                                                                                                          |
| Trait /treatment                                                                                                                                                                                                                                                                                                  | <input checked="" type="checkbox"/> No specific traits/treatments<br><input type="checkbox"/> Several traits/treatments:<br><input type="checkbox"/> Single trait/treatment                                                                                            |
| GMO                                                                                                                                                                                                                                                                                                               | <input checked="" type="checkbox"/> No GMO bias<br><input type="checkbox"/> GMO specific                                                                                                                                                                               |
| <b>METHODOLOGY</b>                                                                                                                                                                                                                                                                                                |                                                                                                                                                                                                                                                                        |
| Observations                                                                                                                                                                                                                                                                                                      | <input checked="" type="checkbox"/> Reported, verifiable methodology<br><input type="checkbox"/> Reported, unverifiable methodology<br><input type="checkbox"/> Unknown, unverifiable methodology                                                                      |
| Frequency                                                                                                                                                                                                                                                                                                         | <input type="checkbox"/> > 1 time/year<br><input type="checkbox"/> 1 time/year:<br><input type="checkbox"/> < 1 time/year                                                                                                                                              |
| Future                                                                                                                                                                                                                                                                                                            | <input checked="" type="checkbox"/> For ≥ 5 years<br><input type="checkbox"/> between 1 and 5 years<br><input type="checkbox"/> no prospect                                                                                                                            |
| Quality of performers                                                                                                                                                                                                                                                                                             | <input checked="" type="checkbox"/> Trained, professionals<br><input type="checkbox"/> Trained, non-professionals – volunteers<br><input type="checkbox"/> Uncertain or not -specified                                                                                 |
| Quality of data                                                                                                                                                                                                                                                                                                   | <input checked="" type="checkbox"/> Standard recording of raw data<br><input type="checkbox"/> Free recording of raw data<br><input type="checkbox"/> Anecdotic                                                                                                        |
| Analysis                                                                                                                                                                                                                                                                                                          | <input checked="" type="checkbox"/> Reported, verifiable methodology<br><input type="checkbox"/> Reported, unverifiable methodology<br><input type="checkbox"/> Unknown, unverifiable methodology                                                                      |
| Quality of analysis                                                                                                                                                                                                                                                                                               | <input checked="" type="checkbox"/> Scientifically based<br><input type="checkbox"/> Indicative only<br><input type="checkbox"/> Unknown                                                                                                                               |
| <b>REPORTING</b>                                                                                                                                                                                                                                                                                                  |                                                                                                                                                                                                                                                                        |
| Language                                                                                                                                                                                                                                                                                                          | Specify reporting language(s): English                                                                                                                                                                                                                                 |
| Availability                                                                                                                                                                                                                                                                                                      | <input type="checkbox"/> Scientific publication<br><input checked="" type="checkbox"/> Official report available on the internet or in other public forum<br><input type="checkbox"/> Official report available from network<br><input type="checkbox"/> Not available |
| Frequency                                                                                                                                                                                                                                                                                                         | <input checked="" type="checkbox"/> ≥ 1 time/year –<br><input type="checkbox"/> < 1 time/year –                                                                                                                                                                        |
| Historical reference                                                                                                                                                                                                                                                                                              | <input checked="" type="checkbox"/> over ≥ 5 years<br><input type="checkbox"/> between 1 and 5 years<br><input type="checkbox"/> no historical analysis                                                                                                                |
| <b>COMMENT(S)</b>                                                                                                                                                                                                                                                                                                 |                                                                                                                                                                                                                                                                        |
| Wealth of biodiversity information. Monitoring network collecting data in a standard electronic form. Data are collected from all participants according to a standard data model in a data exchange system; Standard taxonomic and habitat dictionaries were developed to enable data to be indexed and searched |                                                                                                                                                                                                                                                                        |

## GSEN-09-0183.00.1 GB – NSRI, Silsoe

| EuropaBio's coordinated approach to General Surveillance: Existing Networks |                                                                                                                                                                                                                                                                                                                                                                                                                                                                                                                                                                                      |                                                                                                                                                                                                                                                                                                                                         |  |
|-----------------------------------------------------------------------------|--------------------------------------------------------------------------------------------------------------------------------------------------------------------------------------------------------------------------------------------------------------------------------------------------------------------------------------------------------------------------------------------------------------------------------------------------------------------------------------------------------------------------------------------------------------------------------------|-----------------------------------------------------------------------------------------------------------------------------------------------------------------------------------------------------------------------------------------------------------------------------------------------------------------------------------------|--|
| ORGANISATION                                                                |                                                                                                                                                                                                                                                                                                                                                                                                                                                                                                                                                                                      |                                                                                                                                                                                                                                                                                                                                         |  |
| EuropaBio reference                                                         | GS-EN-09-0183                                                                                                                                                                                                                                                                                                                                                                                                                                                                                                                                                                        |                                                                                                                                                                                                                                                                                                                                         |  |
| Official name of the Network                                                | National Soil Resources Institute, Silsoe                                                                                                                                                                                                                                                                                                                                                                                                                                                                                                                                            |                                                                                                                                                                                                                                                                                                                                         |  |
| Other names                                                                 | NSRI                                                                                                                                                                                                                                                                                                                                                                                                                                                                                                                                                                                 |                                                                                                                                                                                                                                                                                                                                         |  |
| Type of organisation                                                        | Academic<br>Founded 2001                                                                                                                                                                                                                                                                                                                                                                                                                                                                                                                                                             |                                                                                                                                                                                                                                                                                                                                         |  |
| Coordinates                                                                 | National Soil Resources Institute<br>Cranfield University<br>Silsoe<br>Bedfordshire<br>MK45 4DT, UK<br><br>email: nsri[at]cranfield.ac.uk                                                                                                                                                                                                                                                                                                                                                                                                                                            |                                                                                                                                                                                                                                                                                                                                         |  |
| Website                                                                     | <a href="http://www.cranfield.ac.uk/sas/nsri/index.jsp">http://www.cranfield.ac.uk/sas/nsri/index.jsp</a>                                                                                                                                                                                                                                                                                                                                                                                                                                                                            |                                                                                                                                                                                                                                                                                                                                         |  |
| Funding                                                                     | Government<br>LandIS is funded by Defra, earlier by MAFF                                                                                                                                                                                                                                                                                                                                                                                                                                                                                                                             |                                                                                                                                                                                                                                                                                                                                         |  |
| Conflict of interest                                                        | -                                                                                                                                                                                                                                                                                                                                                                                                                                                                                                                                                                                    |                                                                                                                                                                                                                                                                                                                                         |  |
| Part of other network(s)                                                    |                                                                                                                                                                                                                                                                                                                                                                                                                                                                                                                                                                                      |                                                                                                                                                                                                                                                                                                                                         |  |
| Grouping other network(s)                                                   | Part of the Natural Resources Dept.                                                                                                                                                                                                                                                                                                                                                                                                                                                                                                                                                  |                                                                                                                                                                                                                                                                                                                                         |  |
| MONITORING SUBJECT                                                          |                                                                                                                                                                                                                                                                                                                                                                                                                                                                                                                                                                                      |                                                                                                                                                                                                                                                                                                                                         |  |
| Description                                                                 | NSRI is the UK National Reference Centre for soil<br>Creating, maintaining and exploiting inventories and monitoring systems for soil resources<br>Developing digital soil mapping<br>LandIS - Land Information System                                                                                                                                                                                                                                                                                                                                                               |                                                                                                                                                                                                                                                                                                                                         |  |
| Protection goal(s) and/or influencing factor(s)                             | <input checked="" type="checkbox"/> Protection goal<br><br><input type="checkbox"/> Biodiversity<br><input type="checkbox"/> Human Health<br><input type="checkbox"/> Animal Health<br><input type="checkbox"/> Plant Health<br><input checked="" type="checkbox"/> Soil function<br><input type="checkbox"/> Water quality<br><input type="checkbox"/> Sustainable Agriculture                                                                                                                                                                                                      | <input type="checkbox"/> Influencing factor<br><br><input type="checkbox"/> Agronomic practice<br><input type="checkbox"/> Plant protection<br><input type="checkbox"/> GMO cultivation<br><input type="checkbox"/> Environmental conditions                                                                                            |  |
| Duplication of Farmer's questionnaire                                       | <input checked="" type="checkbox"/> No duplication<br><input type="checkbox"/> Partly duplication<br><input type="checkbox"/> Complete duplication                                                                                                                                                                                                                                                                                                                                                                                                                                   |                                                                                                                                                                                                                                                                                                                                         |  |
| SPECIFICITY                                                                 |                                                                                                                                                                                                                                                                                                                                                                                                                                                                                                                                                                                      |                                                                                                                                                                                                                                                                                                                                         |  |
| Geography                                                                   | <input type="checkbox"/> EU -wide<br><br><input type="checkbox"/> Zone A – North<br><input type="checkbox"/> Denmark,<br><input type="checkbox"/> Estonia,<br><input type="checkbox"/> Latvia,<br><input type="checkbox"/> Lithuania,<br><input type="checkbox"/> Finland,<br><input type="checkbox"/> Sweden                                                                                                                                                                                                                                                                        |                                                                                                                                                                                                                                                                                                                                         |  |
|                                                                             | <input checked="" type="checkbox"/> Zone B – Centre:<br><input type="checkbox"/> Belgium,<br><input type="checkbox"/> Czech Republic<br><input type="checkbox"/> Germany,<br><input type="checkbox"/> Ireland,<br><input type="checkbox"/> Luxembourg,<br><input type="checkbox"/> Hungary,<br><input type="checkbox"/> Netherlands,<br><input type="checkbox"/> Austria,<br><input type="checkbox"/> Poland,<br><input type="checkbox"/> Romania,<br><input type="checkbox"/> Slovenia,<br><input type="checkbox"/> Slovakia,<br><input checked="" type="checkbox"/> United Kingdom | <input type="checkbox"/> Zone C – South<br><input type="checkbox"/> Bulgaria,<br><input type="checkbox"/> Greece,<br><input type="checkbox"/> Spain,<br><input type="checkbox"/> France,<br><input type="checkbox"/> Italy,<br><input type="checkbox"/> Cyprus,<br><input type="checkbox"/> Malta,<br><input type="checkbox"/> Portugal |  |
|                                                                             | <input checked="" type="checkbox"/> Regional (specify): England and Wales<br><input type="checkbox"/> Local (specify)                                                                                                                                                                                                                                                                                                                                                                                                                                                                |                                                                                                                                                                                                                                                                                                                                         |  |
| Factors                                                                     | <input checked="" type="checkbox"/> Multiple species/items (specify): different soil parameters<br><input type="checkbox"/> Single species/item (specify)                                                                                                                                                                                                                                                                                                                                                                                                                            |                                                                                                                                                                                                                                                                                                                                         |  |
| Crop                                                                        | <input checked="" type="checkbox"/> No specific crop(s)<br><input type="checkbox"/> Several crops (e.g. all cereals)<br><input type="checkbox"/> Single crop                                                                                                                                                                                                                                                                                                                                                                                                                         |                                                                                                                                                                                                                                                                                                                                         |  |
| Trait /treatment                                                            | <input checked="" type="checkbox"/> No specific traits/treatments<br><input type="checkbox"/> Several traits/treatments<br><input type="checkbox"/> Single trait/treatment                                                                                                                                                                                                                                                                                                                                                                                                           |                                                                                                                                                                                                                                                                                                                                         |  |



|                                                                                                                                                                                                                                                                                                                                                                                                                                 |                                                                                                                                                                                                                                                                                   |
|---------------------------------------------------------------------------------------------------------------------------------------------------------------------------------------------------------------------------------------------------------------------------------------------------------------------------------------------------------------------------------------------------------------------------------|-----------------------------------------------------------------------------------------------------------------------------------------------------------------------------------------------------------------------------------------------------------------------------------|
| GMO                                                                                                                                                                                                                                                                                                                                                                                                                             | <input checked="" type="checkbox"/> No GMO bias<br><input type="checkbox"/> GMO specific                                                                                                                                                                                          |
| <b>METHODOLOGY</b>                                                                                                                                                                                                                                                                                                                                                                                                              |                                                                                                                                                                                                                                                                                   |
| Observations                                                                                                                                                                                                                                                                                                                                                                                                                    | <input type="checkbox"/> Reported, verifiable methodology<br><input type="checkbox"/> Reported, unverifiable methodology<br><input type="checkbox"/> Unknown, unverifiable methodology                                                                                            |
| Frequency                                                                                                                                                                                                                                                                                                                                                                                                                       | <input type="checkbox"/> > 1 time/year<br><input type="checkbox"/> 1 time/year<br><input type="checkbox"/> < 1 time/year                                                                                                                                                          |
| Future                                                                                                                                                                                                                                                                                                                                                                                                                          | <input checked="" type="checkbox"/> For ≥ 5 years<br><input type="checkbox"/> between 1 and 5 years<br><input type="checkbox"/> no prospect                                                                                                                                       |
| Quality of performers                                                                                                                                                                                                                                                                                                                                                                                                           | <input checked="" type="checkbox"/> Trained, professionals<br><input type="checkbox"/> Trained, non-professionals – training by documentation, volunteers<br><input type="checkbox"/> Uncertain or not -specified                                                                 |
| Quality of data                                                                                                                                                                                                                                                                                                                                                                                                                 | <input checked="" type="checkbox"/> Standard recording of raw data<br><input type="checkbox"/> Free recording of raw data<br><input type="checkbox"/> Anecdotic                                                                                                                   |
| Analysis                                                                                                                                                                                                                                                                                                                                                                                                                        | <input type="checkbox"/> Reported, verifiable methodology<br><input type="checkbox"/> Reported, unverifiable methodology<br><input type="checkbox"/> Unknown, unverifiable methodology                                                                                            |
| Quality of analysis                                                                                                                                                                                                                                                                                                                                                                                                             | <input checked="" type="checkbox"/> Scientifically based<br><input type="checkbox"/> Indicative only<br><input type="checkbox"/> Unknown                                                                                                                                          |
| <b>REPORTING</b>                                                                                                                                                                                                                                                                                                                                                                                                                |                                                                                                                                                                                                                                                                                   |
| Language                                                                                                                                                                                                                                                                                                                                                                                                                        | Reporting language(s): English                                                                                                                                                                                                                                                    |
| Availability                                                                                                                                                                                                                                                                                                                                                                                                                    | <input type="checkbox"/> Scientific publication<br><input checked="" type="checkbox"/> Official report available on the internet or in other public forum<br><input checked="" type="checkbox"/> Official report available from network<br><input type="checkbox"/> Not available |
| Frequency                                                                                                                                                                                                                                                                                                                                                                                                                       | <input type="checkbox"/> ≥ 1 time/year –<br><input type="checkbox"/> < 1 time/year                                                                                                                                                                                                |
| Historical reference                                                                                                                                                                                                                                                                                                                                                                                                            | <input checked="" type="checkbox"/> over ≥ 5 years<br><input type="checkbox"/> between 1 and 5 years<br><input type="checkbox"/> no historical analysis                                                                                                                           |
| <b>COMMENT(S)</b>                                                                                                                                                                                                                                                                                                                                                                                                               |                                                                                                                                                                                                                                                                                   |
| <p>The database contains soil and soil-related information for England and Wales including spatial mapping of soils at a variety of scales, as well as corresponding soil property and agro-climatological data. Land Information System (<a href="http://www.landis.org.uk/index.cfm">http://www.landis.org.uk/index.cfm</a>). Soil maps and reports, Soil Site Reports and digital soil data (available against payment).</p> |                                                                                                                                                                                                                                                                                   |

## GSEN-09-0184.00.1 GB – Drinking Water Inspectorate

| EuropaBio's coordinated approach to General Surveillance: Existing Networks |                                                                                                                                                                                                                                                                                                                                                                             |                                                                                                                                                                                                                                                                                                                                                                                                                                                                                                                              |                                                                                                                                                                                                                                                                                              |
|-----------------------------------------------------------------------------|-----------------------------------------------------------------------------------------------------------------------------------------------------------------------------------------------------------------------------------------------------------------------------------------------------------------------------------------------------------------------------|------------------------------------------------------------------------------------------------------------------------------------------------------------------------------------------------------------------------------------------------------------------------------------------------------------------------------------------------------------------------------------------------------------------------------------------------------------------------------------------------------------------------------|----------------------------------------------------------------------------------------------------------------------------------------------------------------------------------------------------------------------------------------------------------------------------------------------|
| <b>ORGANISATION</b>                                                         |                                                                                                                                                                                                                                                                                                                                                                             |                                                                                                                                                                                                                                                                                                                                                                                                                                                                                                                              |                                                                                                                                                                                                                                                                                              |
| EuropaBio reference                                                         | GS-EN-09-0184                                                                                                                                                                                                                                                                                                                                                               |                                                                                                                                                                                                                                                                                                                                                                                                                                                                                                                              |                                                                                                                                                                                                                                                                                              |
| Official name of the Network                                                | <b>Drinking Water Inspectorate</b>                                                                                                                                                                                                                                                                                                                                          |                                                                                                                                                                                                                                                                                                                                                                                                                                                                                                                              |                                                                                                                                                                                                                                                                                              |
| Other names                                                                 | <b>DWI; Water service companies</b>                                                                                                                                                                                                                                                                                                                                         |                                                                                                                                                                                                                                                                                                                                                                                                                                                                                                                              |                                                                                                                                                                                                                                                                                              |
| Type of organisation                                                        | Governmental<br>Founded (unknown)                                                                                                                                                                                                                                                                                                                                           |                                                                                                                                                                                                                                                                                                                                                                                                                                                                                                                              |                                                                                                                                                                                                                                                                                              |
| Coordinates                                                                 | Drinking Water Inspectorate,<br>Room M03,<br>55 Whitehall,<br>London, SW1A 2EY<br><br>Fax: 0300 068 6401<br>Email: dwi.enquiries[at]defra.gsi.gov.uk                                                                                                                                                                                                                        |                                                                                                                                                                                                                                                                                                                                                                                                                                                                                                                              |                                                                                                                                                                                                                                                                                              |
| Website                                                                     | <a href="http://www.dwi.gov.uk/">http://www.dwi.gov.uk/</a>                                                                                                                                                                                                                                                                                                                 |                                                                                                                                                                                                                                                                                                                                                                                                                                                                                                                              |                                                                                                                                                                                                                                                                                              |
| Funding                                                                     | Government                                                                                                                                                                                                                                                                                                                                                                  |                                                                                                                                                                                                                                                                                                                                                                                                                                                                                                                              |                                                                                                                                                                                                                                                                                              |
| Conflict of interest                                                        | -                                                                                                                                                                                                                                                                                                                                                                           |                                                                                                                                                                                                                                                                                                                                                                                                                                                                                                                              |                                                                                                                                                                                                                                                                                              |
| Part of other network(s)                                                    |                                                                                                                                                                                                                                                                                                                                                                             |                                                                                                                                                                                                                                                                                                                                                                                                                                                                                                                              |                                                                                                                                                                                                                                                                                              |
| Grouping other network(s)                                                   |                                                                                                                                                                                                                                                                                                                                                                             |                                                                                                                                                                                                                                                                                                                                                                                                                                                                                                                              |                                                                                                                                                                                                                                                                                              |
| <b>MONITORING SUBJECT</b>                                                   |                                                                                                                                                                                                                                                                                                                                                                             |                                                                                                                                                                                                                                                                                                                                                                                                                                                                                                                              |                                                                                                                                                                                                                                                                                              |
| Description                                                                 | <b>Assessing the quality of drinking water in England and Wales</b>                                                                                                                                                                                                                                                                                                         |                                                                                                                                                                                                                                                                                                                                                                                                                                                                                                                              |                                                                                                                                                                                                                                                                                              |
| Protection goal(s) and/or influencing factor(s)                             | <input checked="" type="checkbox"/> Protection goal<br><input type="checkbox"/> Biodiversity<br><input type="checkbox"/> Human Health<br><input type="checkbox"/> Animal Health<br><input type="checkbox"/> Plant Health<br><input type="checkbox"/> Soil function<br><input checked="" type="checkbox"/> Water quality<br><input type="checkbox"/> Sustainable Agriculture | <input type="checkbox"/> Influencing factor<br><input type="checkbox"/> Agronomic practice<br><input type="checkbox"/> Plant protection<br><input type="checkbox"/> GMO cultivation<br><input type="checkbox"/> Environmental conditions                                                                                                                                                                                                                                                                                     |                                                                                                                                                                                                                                                                                              |
| Duplication of Farmer's questionnaire                                       | <input checked="" type="checkbox"/> No duplication<br><input type="checkbox"/> Partly duplication<br><input type="checkbox"/> Complete duplication                                                                                                                                                                                                                          |                                                                                                                                                                                                                                                                                                                                                                                                                                                                                                                              |                                                                                                                                                                                                                                                                                              |
| <b>SPECIFICITY</b>                                                          |                                                                                                                                                                                                                                                                                                                                                                             |                                                                                                                                                                                                                                                                                                                                                                                                                                                                                                                              |                                                                                                                                                                                                                                                                                              |
| Geography                                                                   | <input type="checkbox"/> EU -wide                                                                                                                                                                                                                                                                                                                                           |                                                                                                                                                                                                                                                                                                                                                                                                                                                                                                                              |                                                                                                                                                                                                                                                                                              |
|                                                                             | <input type="checkbox"/> Zone A – North                                                                                                                                                                                                                                                                                                                                     | <input checked="" type="checkbox"/> Zone B – Centre:                                                                                                                                                                                                                                                                                                                                                                                                                                                                         | <input type="checkbox"/> Zone C – South                                                                                                                                                                                                                                                      |
|                                                                             | <input type="checkbox"/> Denmark,<br><input type="checkbox"/> Estonia,<br><input type="checkbox"/> Latvia,<br><input type="checkbox"/> Lithuania,<br><input type="checkbox"/> Finland,<br><input type="checkbox"/> Sweden                                                                                                                                                   | <input type="checkbox"/> Belgium,<br><input type="checkbox"/> Czech Republic<br><input type="checkbox"/> Germany,<br><input type="checkbox"/> Ireland,<br><input type="checkbox"/> Luxembourg,<br><input type="checkbox"/> Hungary,<br><input type="checkbox"/> Netherlands,<br><input type="checkbox"/> Austria,<br><input type="checkbox"/> Poland,<br><input type="checkbox"/> Romania,<br><input type="checkbox"/> Slovenia,<br><input type="checkbox"/> Slovakia,<br><input checked="" type="checkbox"/> United Kingdom | <input type="checkbox"/> Bulgaria,<br><input type="checkbox"/> Greece,<br><input type="checkbox"/> Spain,<br><input type="checkbox"/> France,<br><input type="checkbox"/> Italy,<br><input type="checkbox"/> Cyprus,<br><input type="checkbox"/> Malta,<br><input type="checkbox"/> Portugal |
|                                                                             | <input checked="" type="checkbox"/> Regional (specify): England and Wales<br><input type="checkbox"/> Local (specify)                                                                                                                                                                                                                                                       |                                                                                                                                                                                                                                                                                                                                                                                                                                                                                                                              |                                                                                                                                                                                                                                                                                              |
| Factors                                                                     | <input checked="" type="checkbox"/> Multiple species/items (specify): different soil parameters<br><input type="checkbox"/> Single species/item (specify)                                                                                                                                                                                                                   |                                                                                                                                                                                                                                                                                                                                                                                                                                                                                                                              |                                                                                                                                                                                                                                                                                              |
| Crop                                                                        | <input checked="" type="checkbox"/> No specific crop(s)<br><input type="checkbox"/> Several crops (e.g. all cereals)<br><input type="checkbox"/> Single crop                                                                                                                                                                                                                |                                                                                                                                                                                                                                                                                                                                                                                                                                                                                                                              |                                                                                                                                                                                                                                                                                              |
| Trait /treatment                                                            | <input checked="" type="checkbox"/> No specific traits/treatments<br><input type="checkbox"/> Several traits/treatments<br><input type="checkbox"/> Single trait/treatment                                                                                                                                                                                                  |                                                                                                                                                                                                                                                                                                                                                                                                                                                                                                                              |                                                                                                                                                                                                                                                                                              |
| GMO                                                                         | <input checked="" type="checkbox"/> No GMO bias<br><input type="checkbox"/> GMO specific                                                                                                                                                                                                                                                                                    |                                                                                                                                                                                                                                                                                                                                                                                                                                                                                                                              |                                                                                                                                                                                                                                                                                              |
| <b>METHODOLOGY</b>                                                          |                                                                                                                                                                                                                                                                                                                                                                             |                                                                                                                                                                                                                                                                                                                                                                                                                                                                                                                              |                                                                                                                                                                                                                                                                                              |

|                                                                                                                                                                                                                                                                                                                     |                                                                                                                                                                                                                                                                        |
|---------------------------------------------------------------------------------------------------------------------------------------------------------------------------------------------------------------------------------------------------------------------------------------------------------------------|------------------------------------------------------------------------------------------------------------------------------------------------------------------------------------------------------------------------------------------------------------------------|
| Observations                                                                                                                                                                                                                                                                                                        | <input checked="" type="checkbox"/> Reported, verifiable methodology<br><input type="checkbox"/> Reported, unverifiable methodology<br><input type="checkbox"/> Unknown, unverifiable methodology                                                                      |
| Frequency                                                                                                                                                                                                                                                                                                           | <input checked="" type="checkbox"/> > 1 time/year<br><input type="checkbox"/> 1 time/year<br><input type="checkbox"/> < 1 time/year                                                                                                                                    |
| Future                                                                                                                                                                                                                                                                                                              | <input checked="" type="checkbox"/> For $\geq$ 5 years<br><input type="checkbox"/> between 1 and 5 years<br><input type="checkbox"/> no prospect                                                                                                                       |
| Quality of performers                                                                                                                                                                                                                                                                                               | <input checked="" type="checkbox"/> Trained, professionals<br><input type="checkbox"/> Trained, non-professionals – training by documentation, volunteers<br><input type="checkbox"/> Uncertain or not -specified                                                      |
| Quality of data                                                                                                                                                                                                                                                                                                     | <input checked="" type="checkbox"/> Standard recording of raw data<br><input type="checkbox"/> Free recording of raw data<br><input type="checkbox"/> Anecdotic                                                                                                        |
| Analysis                                                                                                                                                                                                                                                                                                            | <input type="checkbox"/> Reported, verifiable methodology<br><input type="checkbox"/> Reported, unverifiable methodology<br><input checked="" type="checkbox"/> Unknown, unverifiable methodology                                                                      |
| Quality of analysis                                                                                                                                                                                                                                                                                                 | <input checked="" type="checkbox"/> Scientifically based<br><input type="checkbox"/> Indicative only<br><input type="checkbox"/> Unknown                                                                                                                               |
| <b>REPORTING</b>                                                                                                                                                                                                                                                                                                    |                                                                                                                                                                                                                                                                        |
| Language                                                                                                                                                                                                                                                                                                            | Reporting language(s): English                                                                                                                                                                                                                                         |
| Availability                                                                                                                                                                                                                                                                                                        | <input type="checkbox"/> Scientific publication<br><input checked="" type="checkbox"/> Official report available on the internet or in other public forum<br><input type="checkbox"/> Official report available from network<br><input type="checkbox"/> Not available |
| Frequency                                                                                                                                                                                                                                                                                                           | <input checked="" type="checkbox"/> $\geq$ 1 time/year –<br><input type="checkbox"/> < 1 time/year                                                                                                                                                                     |
| Historical reference                                                                                                                                                                                                                                                                                                | <input checked="" type="checkbox"/> over $\geq$ 5 years<br><input type="checkbox"/> between 1 and 5 years<br><input type="checkbox"/> no historical analysis                                                                                                           |
| <b>COMMENT(S)</b>                                                                                                                                                                                                                                                                                                   |                                                                                                                                                                                                                                                                        |
| Water samples are taken by the water companies; testing according to European or national standards (a.o. pesticides, nitrates, ...) with some additional parameters such as ammonium, sulphate and colony counts. DWI performs audits. Annual reports with overview maps per region. Detailed tables on incidents. |                                                                                                                                                                                                                                                                        |

## GSEN-09-0185.00.1 GB – Metereological Office

| EuropaBio's coordinated approach to General Surveillance: Existing Networks |                                                                                                                                                                                                                                                                                                                                                           |                                                                                                                                                                                                                                                                                                                                                                                                                                                                                                                              |                                                                                                                                                                                                                                                                                              |
|-----------------------------------------------------------------------------|-----------------------------------------------------------------------------------------------------------------------------------------------------------------------------------------------------------------------------------------------------------------------------------------------------------------------------------------------------------|------------------------------------------------------------------------------------------------------------------------------------------------------------------------------------------------------------------------------------------------------------------------------------------------------------------------------------------------------------------------------------------------------------------------------------------------------------------------------------------------------------------------------|----------------------------------------------------------------------------------------------------------------------------------------------------------------------------------------------------------------------------------------------------------------------------------------------|
| <b>ORGANISATION</b>                                                         |                                                                                                                                                                                                                                                                                                                                                           |                                                                                                                                                                                                                                                                                                                                                                                                                                                                                                                              |                                                                                                                                                                                                                                                                                              |
| EuropaBio reference                                                         | GS-EN-09-0185                                                                                                                                                                                                                                                                                                                                             |                                                                                                                                                                                                                                                                                                                                                                                                                                                                                                                              |                                                                                                                                                                                                                                                                                              |
| Official name of the Network                                                | <b>Meteorological Office<br/>National Weather Service</b>                                                                                                                                                                                                                                                                                                 |                                                                                                                                                                                                                                                                                                                                                                                                                                                                                                                              |                                                                                                                                                                                                                                                                                              |
| Other names                                                                 | <b>Met Office</b>                                                                                                                                                                                                                                                                                                                                         |                                                                                                                                                                                                                                                                                                                                                                                                                                                                                                                              |                                                                                                                                                                                                                                                                                              |
| Type of organisation                                                        | Governmental<br>Founded 1854                                                                                                                                                                                                                                                                                                                              |                                                                                                                                                                                                                                                                                                                                                                                                                                                                                                                              |                                                                                                                                                                                                                                                                                              |
| Coordinates                                                                 | Met Office<br>FitzRoy Road<br>Exeter<br>Devon<br>EX1 3PB<br><br>Fax: +44 1392 885681<br>Email: enquiries[at]metoffice.gov.uk                                                                                                                                                                                                                              |                                                                                                                                                                                                                                                                                                                                                                                                                                                                                                                              |                                                                                                                                                                                                                                                                                              |
| Website                                                                     | <a href="http://www.metoffice.gov.uk/">http://www.metoffice.gov.uk/</a>                                                                                                                                                                                                                                                                                   |                                                                                                                                                                                                                                                                                                                                                                                                                                                                                                                              |                                                                                                                                                                                                                                                                                              |
| Funding                                                                     | Government. A Trading Fund within the Ministry of Defence.                                                                                                                                                                                                                                                                                                |                                                                                                                                                                                                                                                                                                                                                                                                                                                                                                                              |                                                                                                                                                                                                                                                                                              |
| Conflict of interest                                                        | -                                                                                                                                                                                                                                                                                                                                                         |                                                                                                                                                                                                                                                                                                                                                                                                                                                                                                                              |                                                                                                                                                                                                                                                                                              |
| Part of other network(s)                                                    |                                                                                                                                                                                                                                                                                                                                                           |                                                                                                                                                                                                                                                                                                                                                                                                                                                                                                                              |                                                                                                                                                                                                                                                                                              |
| Grouping other network(s)                                                   |                                                                                                                                                                                                                                                                                                                                                           |                                                                                                                                                                                                                                                                                                                                                                                                                                                                                                                              |                                                                                                                                                                                                                                                                                              |
| <b>MONITORING SUBJECT</b>                                                   |                                                                                                                                                                                                                                                                                                                                                           |                                                                                                                                                                                                                                                                                                                                                                                                                                                                                                                              |                                                                                                                                                                                                                                                                                              |
| Description                                                                 | <b>Forecasting the weather; historic data</b>                                                                                                                                                                                                                                                                                                             |                                                                                                                                                                                                                                                                                                                                                                                                                                                                                                                              |                                                                                                                                                                                                                                                                                              |
| Protection goal(s) and/or influencing factor(s)                             | <input type="checkbox"/> Protection goal<br><br><input type="checkbox"/> Biodiversity<br><input type="checkbox"/> Human Health<br><input type="checkbox"/> Animal Health<br><input type="checkbox"/> Plant Health<br><input type="checkbox"/> Soil function<br><input type="checkbox"/> Water quality<br><input type="checkbox"/> Sustainable Agriculture | <input checked="" type="checkbox"/> Influencing factor<br><br><input type="checkbox"/> Agronomic practice<br><input type="checkbox"/> Plant protection<br><input type="checkbox"/> GMO cultivation<br><input checked="" type="checkbox"/> Environmental conditions                                                                                                                                                                                                                                                           |                                                                                                                                                                                                                                                                                              |
| Duplication of Farmer's questionnaire                                       | <input checked="" type="checkbox"/> No duplication<br><input type="checkbox"/> Partly duplication<br><input type="checkbox"/> Complete duplication                                                                                                                                                                                                        |                                                                                                                                                                                                                                                                                                                                                                                                                                                                                                                              |                                                                                                                                                                                                                                                                                              |
| <b>SPECIFICITY</b>                                                          |                                                                                                                                                                                                                                                                                                                                                           |                                                                                                                                                                                                                                                                                                                                                                                                                                                                                                                              |                                                                                                                                                                                                                                                                                              |
| Geography                                                                   | <input type="checkbox"/> EU -wide<br><br><input type="checkbox"/> Zone A – North<br><input checked="" type="checkbox"/> Zone B – Centre:<br><input type="checkbox"/> Zone C – South                                                                                                                                                                       |                                                                                                                                                                                                                                                                                                                                                                                                                                                                                                                              |                                                                                                                                                                                                                                                                                              |
|                                                                             | <input type="checkbox"/> Denmark,<br><input type="checkbox"/> Estonia,<br><input type="checkbox"/> Latvia,<br><input type="checkbox"/> Lithuania,<br><input type="checkbox"/> Finland,<br><input type="checkbox"/> Sweden                                                                                                                                 | <input type="checkbox"/> Belgium,<br><input type="checkbox"/> Czech Republic<br><input type="checkbox"/> Germany,<br><input type="checkbox"/> Ireland,<br><input type="checkbox"/> Luxembourg,<br><input type="checkbox"/> Hungary,<br><input type="checkbox"/> Netherlands,<br><input type="checkbox"/> Austria,<br><input type="checkbox"/> Poland,<br><input type="checkbox"/> Romania,<br><input type="checkbox"/> Slovenia,<br><input type="checkbox"/> Slovakia,<br><input checked="" type="checkbox"/> United Kingdom | <input type="checkbox"/> Bulgaria,<br><input type="checkbox"/> Greece,<br><input type="checkbox"/> Spain,<br><input type="checkbox"/> France,<br><input type="checkbox"/> Italy,<br><input type="checkbox"/> Cyprus,<br><input type="checkbox"/> Malta,<br><input type="checkbox"/> Portugal |
|                                                                             | <input type="checkbox"/> Regional (specify)<br><input type="checkbox"/> Local (specify)                                                                                                                                                                                                                                                                   |                                                                                                                                                                                                                                                                                                                                                                                                                                                                                                                              |                                                                                                                                                                                                                                                                                              |
| Factors                                                                     | <input checked="" type="checkbox"/> Multiple species/items (specify): weather and climate parameters<br><input type="checkbox"/> Single species/item (specify)                                                                                                                                                                                            |                                                                                                                                                                                                                                                                                                                                                                                                                                                                                                                              |                                                                                                                                                                                                                                                                                              |
| Crop                                                                        | <input checked="" type="checkbox"/> No specific crop(s)<br><input type="checkbox"/> Several crops (e.g. all cereals)<br><input type="checkbox"/> Single crop                                                                                                                                                                                              |                                                                                                                                                                                                                                                                                                                                                                                                                                                                                                                              |                                                                                                                                                                                                                                                                                              |
| Trait /treatment                                                            | <input checked="" type="checkbox"/> No specific traits/treatments<br><input type="checkbox"/> Several traits/treatments<br><input type="checkbox"/> Single trait/treatment                                                                                                                                                                                |                                                                                                                                                                                                                                                                                                                                                                                                                                                                                                                              |                                                                                                                                                                                                                                                                                              |
| GMO                                                                         | <input checked="" type="checkbox"/> No GMO bias                                                                                                                                                                                                                                                                                                           |                                                                                                                                                                                                                                                                                                                                                                                                                                                                                                                              |                                                                                                                                                                                                                                                                                              |

|                                                                                                                                                                                                      |                                                                                                                                                                                                                                                                        |
|------------------------------------------------------------------------------------------------------------------------------------------------------------------------------------------------------|------------------------------------------------------------------------------------------------------------------------------------------------------------------------------------------------------------------------------------------------------------------------|
|                                                                                                                                                                                                      | <input type="checkbox"/> GMO specific                                                                                                                                                                                                                                  |
| <b>METHODOLOGY</b>                                                                                                                                                                                   |                                                                                                                                                                                                                                                                        |
| Observations                                                                                                                                                                                         | <input type="checkbox"/> Reported, verifiable methodology<br><input checked="" type="checkbox"/> Reported, unverifiable methodology<br><input type="checkbox"/> Unknown, unverifiable methodology                                                                      |
| Frequency                                                                                                                                                                                            | <input checked="" type="checkbox"/> > 1 time/year<br><input type="checkbox"/> 1 time/year<br><input type="checkbox"/> < 1 time/year                                                                                                                                    |
| Future                                                                                                                                                                                               | <input checked="" type="checkbox"/> For ≥ 5 years<br><input type="checkbox"/> between 1 and 5 years<br><input type="checkbox"/> no prospect                                                                                                                            |
| Quality of performers                                                                                                                                                                                | <input checked="" type="checkbox"/> Trained, professionals<br><input type="checkbox"/> Trained, non-professionals – training by documentation, volunteers<br><input type="checkbox"/> Uncertain or not -specified                                                      |
| Quality of data                                                                                                                                                                                      | <input checked="" type="checkbox"/> Standard recording of raw data<br><input type="checkbox"/> Free recording of raw data<br><input type="checkbox"/> Anecdotic                                                                                                        |
| Analysis                                                                                                                                                                                             | <input type="checkbox"/> Reported, verifiable methodology<br><input checked="" type="checkbox"/> Reported, unverifiable methodology<br><input type="checkbox"/> Unknown, unverifiable methodology                                                                      |
| Quality of analysis                                                                                                                                                                                  | <input checked="" type="checkbox"/> Scientifically based<br><input type="checkbox"/> Indicative only<br><input type="checkbox"/> Unknown                                                                                                                               |
| <b>REPORTING</b>                                                                                                                                                                                     |                                                                                                                                                                                                                                                                        |
| Language                                                                                                                                                                                             | Reporting language(s): English                                                                                                                                                                                                                                         |
| Availability                                                                                                                                                                                         | <input type="checkbox"/> Scientific publication<br><input checked="" type="checkbox"/> Official report available on the internet or in other public forum<br><input type="checkbox"/> Official report available from network<br><input type="checkbox"/> Not available |
| Frequency                                                                                                                                                                                            | <input checked="" type="checkbox"/> ≥ 1 time/year –<br><input type="checkbox"/> < 1 time/year                                                                                                                                                                          |
| Historical reference                                                                                                                                                                                 | <input checked="" type="checkbox"/> over ≥ 5 years<br><input type="checkbox"/> between 1 and 5 years<br><input type="checkbox"/> no historical analysis                                                                                                                |
| <b>COMMENT(S)</b>                                                                                                                                                                                    |                                                                                                                                                                                                                                                                        |
| Monthly, seasonal and annual summaries, weather extremes; regional climates; historic station data ( <a href="http://www.metoffice.gov.uk/climate/uk/">http://www.metoffice.gov.uk/climate/uk/</a> ) |                                                                                                                                                                                                                                                                        |

## GSEN-09-0187.00.1 GB – WIIS

| EuropaBio's coordinated approach to General Surveillance: Existing Networks |                                                                                                                                                                                                                                                                                                                      |                                                                                                                                                                                                                                                                                                                                                                                                                                                                                                                              |                                                                                                                                                                                                                                                                                              |
|-----------------------------------------------------------------------------|----------------------------------------------------------------------------------------------------------------------------------------------------------------------------------------------------------------------------------------------------------------------------------------------------------------------|------------------------------------------------------------------------------------------------------------------------------------------------------------------------------------------------------------------------------------------------------------------------------------------------------------------------------------------------------------------------------------------------------------------------------------------------------------------------------------------------------------------------------|----------------------------------------------------------------------------------------------------------------------------------------------------------------------------------------------------------------------------------------------------------------------------------------------|
| <b>ORGANISATION</b>                                                         |                                                                                                                                                                                                                                                                                                                      |                                                                                                                                                                                                                                                                                                                                                                                                                                                                                                                              |                                                                                                                                                                                                                                                                                              |
| EuropaBio reference                                                         | GS-EN-09-0187                                                                                                                                                                                                                                                                                                        |                                                                                                                                                                                                                                                                                                                                                                                                                                                                                                                              |                                                                                                                                                                                                                                                                                              |
| Official name of the Network                                                | <b>Wildlife Incident Investigation Scheme</b><br>Health & Safety Executive<br>Chemicals Regulation Directorate, Pesticides                                                                                                                                                                                           |                                                                                                                                                                                                                                                                                                                                                                                                                                                                                                                              |                                                                                                                                                                                                                                                                                              |
| Other names                                                                 | <b>WIIS</b>                                                                                                                                                                                                                                                                                                          |                                                                                                                                                                                                                                                                                                                                                                                                                                                                                                                              |                                                                                                                                                                                                                                                                                              |
| Type of organisation                                                        | Governmental<br>Founded (unknown)                                                                                                                                                                                                                                                                                    |                                                                                                                                                                                                                                                                                                                                                                                                                                                                                                                              |                                                                                                                                                                                                                                                                                              |
| Coordinates                                                                 | Email: wiis[at]hse.gsi.gov.uk                                                                                                                                                                                                                                                                                        |                                                                                                                                                                                                                                                                                                                                                                                                                                                                                                                              |                                                                                                                                                                                                                                                                                              |
| Website                                                                     | <a href="http://www.pesticides.gov.uk/environment.asp?id=58">http://www.pesticides.gov.uk/environment.asp?id=58</a>                                                                                                                                                                                                  |                                                                                                                                                                                                                                                                                                                                                                                                                                                                                                                              |                                                                                                                                                                                                                                                                                              |
| Funding                                                                     | public                                                                                                                                                                                                                                                                                                               |                                                                                                                                                                                                                                                                                                                                                                                                                                                                                                                              |                                                                                                                                                                                                                                                                                              |
| Conflict of interest                                                        | -                                                                                                                                                                                                                                                                                                                    |                                                                                                                                                                                                                                                                                                                                                                                                                                                                                                                              |                                                                                                                                                                                                                                                                                              |
| Part of other network(s)                                                    | association with the Wildlife Incident Unit at the The Food and Environment Research Agency (FERA)                                                                                                                                                                                                                   |                                                                                                                                                                                                                                                                                                                                                                                                                                                                                                                              |                                                                                                                                                                                                                                                                                              |
| Grouping other network(s)                                                   | WIIS acts                                                                                                                                                                                                                                                                                                            |                                                                                                                                                                                                                                                                                                                                                                                                                                                                                                                              |                                                                                                                                                                                                                                                                                              |
| <b>MONITORING SUBJECT</b>                                                   |                                                                                                                                                                                                                                                                                                                      |                                                                                                                                                                                                                                                                                                                                                                                                                                                                                                                              |                                                                                                                                                                                                                                                                                              |
| Description                                                                 | The Scheme investigates the deaths of wildlife, including beneficial insects and some pets, throughout the UK where there is evidence that pesticide poisoning may be involved. It is used to monitor pesticide use after approval, so that product approvals can be revised if necessary.                           |                                                                                                                                                                                                                                                                                                                                                                                                                                                                                                                              |                                                                                                                                                                                                                                                                                              |
| Protection goal(s) and/or influencing factor(s)                             | <input checked="" type="checkbox"/> Protection goal                                                                                                                                                                                                                                                                  | <input type="checkbox"/> Influencing factor                                                                                                                                                                                                                                                                                                                                                                                                                                                                                  |                                                                                                                                                                                                                                                                                              |
|                                                                             | <input type="checkbox"/> Biodiversity<br><input type="checkbox"/> Human Health<br><input checked="" type="checkbox"/> Animal Health<br><input type="checkbox"/> Plant Health<br><input type="checkbox"/> Soil function<br><input type="checkbox"/> Water quality<br><input type="checkbox"/> Sustainable Agriculture | <input type="checkbox"/> Agronomic practice<br><input type="checkbox"/> Plant protection<br><input type="checkbox"/> GMO cultivation<br><input type="checkbox"/> Environmental conditions                                                                                                                                                                                                                                                                                                                                    |                                                                                                                                                                                                                                                                                              |
| Duplication of Farmer's questionnaire                                       | <input checked="" type="checkbox"/> No duplication<br><input type="checkbox"/> Partly duplication<br><input type="checkbox"/> Complete duplication                                                                                                                                                                   |                                                                                                                                                                                                                                                                                                                                                                                                                                                                                                                              |                                                                                                                                                                                                                                                                                              |
| <b>SPECIFICITY</b>                                                          |                                                                                                                                                                                                                                                                                                                      |                                                                                                                                                                                                                                                                                                                                                                                                                                                                                                                              |                                                                                                                                                                                                                                                                                              |
| Geography                                                                   | <input type="checkbox"/> EU -wide                                                                                                                                                                                                                                                                                    |                                                                                                                                                                                                                                                                                                                                                                                                                                                                                                                              |                                                                                                                                                                                                                                                                                              |
|                                                                             | <input type="checkbox"/> Zone A – North                                                                                                                                                                                                                                                                              | <input checked="" type="checkbox"/> Zone B – Centre:                                                                                                                                                                                                                                                                                                                                                                                                                                                                         | <input type="checkbox"/> Zone C – South                                                                                                                                                                                                                                                      |
|                                                                             | <input type="checkbox"/> Denmark,<br><input type="checkbox"/> Estonia,<br><input type="checkbox"/> Latvia,<br><input type="checkbox"/> Lithuania,<br><input type="checkbox"/> Finland,<br><input type="checkbox"/> Sweden                                                                                            | <input type="checkbox"/> Belgium,<br><input type="checkbox"/> Czech Republic<br><input type="checkbox"/> Germany,<br><input type="checkbox"/> Ireland,<br><input type="checkbox"/> Luxembourg,<br><input type="checkbox"/> Hungary,<br><input type="checkbox"/> Netherlands,<br><input type="checkbox"/> Austria,<br><input type="checkbox"/> Poland,<br><input type="checkbox"/> Romania,<br><input type="checkbox"/> Slovenia,<br><input type="checkbox"/> Slovakia,<br><input checked="" type="checkbox"/> United Kingdom | <input type="checkbox"/> Bulgaria,<br><input type="checkbox"/> Greece,<br><input type="checkbox"/> Spain,<br><input type="checkbox"/> France,<br><input type="checkbox"/> Italy,<br><input type="checkbox"/> Cyprus,<br><input type="checkbox"/> Malta,<br><input type="checkbox"/> Portugal |
|                                                                             | <input type="checkbox"/> Regional (specify)<br><input type="checkbox"/> Local (specify)                                                                                                                                                                                                                              |                                                                                                                                                                                                                                                                                                                                                                                                                                                                                                                              |                                                                                                                                                                                                                                                                                              |
| Factors                                                                     | <input checked="" type="checkbox"/> Multiple species/items (specify): wildlife, beneficial insects and some pets<br><input type="checkbox"/> Single species/item (specify)                                                                                                                                           |                                                                                                                                                                                                                                                                                                                                                                                                                                                                                                                              |                                                                                                                                                                                                                                                                                              |
| Crop                                                                        | <input checked="" type="checkbox"/> No specific crop(s)<br><input type="checkbox"/> Several crops (e.g. all cereals)<br><input type="checkbox"/> Single crop                                                                                                                                                         |                                                                                                                                                                                                                                                                                                                                                                                                                                                                                                                              |                                                                                                                                                                                                                                                                                              |
| Trait /treatment                                                            | <input checked="" type="checkbox"/> No specific traits/treatments<br><input type="checkbox"/> Several traits/treatments<br><input type="checkbox"/> Single trait/treatment                                                                                                                                           |                                                                                                                                                                                                                                                                                                                                                                                                                                                                                                                              |                                                                                                                                                                                                                                                                                              |
| GMO                                                                         | <input checked="" type="checkbox"/> No GMO bias<br><input type="checkbox"/> GMO specific                                                                                                                                                                                                                             |                                                                                                                                                                                                                                                                                                                                                                                                                                                                                                                              |                                                                                                                                                                                                                                                                                              |
| <b>METHODOLOGY</b>                                                          |                                                                                                                                                                                                                                                                                                                      |                                                                                                                                                                                                                                                                                                                                                                                                                                                                                                                              |                                                                                                                                                                                                                                                                                              |

|                                                                                                      |                                                                                                                                                                                                                                                                        |
|------------------------------------------------------------------------------------------------------|------------------------------------------------------------------------------------------------------------------------------------------------------------------------------------------------------------------------------------------------------------------------|
| Observations                                                                                         | <input checked="" type="checkbox"/> Reported, verifiable methodology<br><input type="checkbox"/> Reported, unverifiable methodology<br><input type="checkbox"/> Unknown, unverifiable methodology                                                                      |
| Frequency                                                                                            | <input checked="" type="checkbox"/> > 1 time/year<br><input type="checkbox"/> 1 time/year<br><input type="checkbox"/> < 1 time/year                                                                                                                                    |
| Future                                                                                               | <input checked="" type="checkbox"/> For ≥ 5 years<br><input type="checkbox"/> between 1 and 5 years<br><input type="checkbox"/> no prospect                                                                                                                            |
| Quality of performers                                                                                | <input type="checkbox"/> Trained, professionals<br><input checked="" type="checkbox"/> Trained, non-professionals – members of the public<br><input type="checkbox"/> Uncertain or not -specified                                                                      |
| Quality of data                                                                                      | <input checked="" type="checkbox"/> Standard recording of raw data<br><input type="checkbox"/> Free recording of raw data<br><input type="checkbox"/> Anecdotic                                                                                                        |
| Analysis                                                                                             | <input checked="" type="checkbox"/> Reported, verifiable methodology<br><input type="checkbox"/> Reported, unverifiable methodology<br><input type="checkbox"/> Unknown, unverifiable methodology                                                                      |
| Quality of analysis                                                                                  | <input checked="" type="checkbox"/> Scientifically based<br><input type="checkbox"/> Indicative only<br><input type="checkbox"/> Unknown                                                                                                                               |
| <b>REPORTING</b>                                                                                     |                                                                                                                                                                                                                                                                        |
| Language                                                                                             | Specify reporting language(s): English                                                                                                                                                                                                                                 |
| Availability                                                                                         | <input type="checkbox"/> Scientific publication<br><input checked="" type="checkbox"/> Official report available on the internet or in other public forum<br><input type="checkbox"/> Official report available from network<br><input type="checkbox"/> Not available |
| Frequency                                                                                            | <input checked="" type="checkbox"/> ≥ 1 time/year<br><input type="checkbox"/> < 1 time/year                                                                                                                                                                            |
| Historical reference                                                                                 | <input checked="" type="checkbox"/> over ≥ 5 years<br><input type="checkbox"/> between 1 and 5 years<br><input type="checkbox"/> no historical analysis                                                                                                                |
| <b>COMMENT(S)</b>                                                                                    |                                                                                                                                                                                                                                                                        |
| Quarterly Reports: "Pesticides Poisoning of Animals". Pesticide incidence reports (annual) and maps. |                                                                                                                                                                                                                                                                        |

## GSEN-09-0192.00.1 GB – PRC

| EuropaBio's coordinated approach to General Surveillance: Existing Networks |                                                                                                                                                                                                                                                                                                                                                                             |                                                                                                                                                                                                                                                                                                                                                                                                                                                                                                                              |                                                                                                                                                                                                                                                                                              |
|-----------------------------------------------------------------------------|-----------------------------------------------------------------------------------------------------------------------------------------------------------------------------------------------------------------------------------------------------------------------------------------------------------------------------------------------------------------------------|------------------------------------------------------------------------------------------------------------------------------------------------------------------------------------------------------------------------------------------------------------------------------------------------------------------------------------------------------------------------------------------------------------------------------------------------------------------------------------------------------------------------------|----------------------------------------------------------------------------------------------------------------------------------------------------------------------------------------------------------------------------------------------------------------------------------------------|
| ORGANISATION                                                                |                                                                                                                                                                                                                                                                                                                                                                             |                                                                                                                                                                                                                                                                                                                                                                                                                                                                                                                              |                                                                                                                                                                                                                                                                                              |
| EuropaBio reference                                                         | GS-EN-09-0184                                                                                                                                                                                                                                                                                                                                                               |                                                                                                                                                                                                                                                                                                                                                                                                                                                                                                                              |                                                                                                                                                                                                                                                                                              |
| Official name of the Network                                                | Pesticide Residues Committee                                                                                                                                                                                                                                                                                                                                                |                                                                                                                                                                                                                                                                                                                                                                                                                                                                                                                              |                                                                                                                                                                                                                                                                                              |
| Other names                                                                 | PRC, Defra Expert Committee on Pesticide Residues in Food (PRiF)                                                                                                                                                                                                                                                                                                            |                                                                                                                                                                                                                                                                                                                                                                                                                                                                                                                              |                                                                                                                                                                                                                                                                                              |
| Type of organisation                                                        | Governmental<br>Founded 2000                                                                                                                                                                                                                                                                                                                                                |                                                                                                                                                                                                                                                                                                                                                                                                                                                                                                                              |                                                                                                                                                                                                                                                                                              |
| Coordinates                                                                 | Pesticide Residues Committee Secretariat<br>c/o Chemicals Regulation Directorate<br>Consumer Safety and European Policy Branch<br>Mallard House<br>Kings Pool<br>3 Peasholme Green<br>York<br>YO1 7PX<br><br>Fax: 01904 455733<br>Email: prc[at]hse.gsi.gov.uk                                                                                                              |                                                                                                                                                                                                                                                                                                                                                                                                                                                                                                                              |                                                                                                                                                                                                                                                                                              |
| Website                                                                     | <a href="http://www.pesticides.gov.uk/prc_home.asp">http://www.pesticides.gov.uk/prc_home.asp</a>                                                                                                                                                                                                                                                                           |                                                                                                                                                                                                                                                                                                                                                                                                                                                                                                                              |                                                                                                                                                                                                                                                                                              |
| Funding                                                                     | 60% levy on the sales of pesticides, 40% government                                                                                                                                                                                                                                                                                                                         |                                                                                                                                                                                                                                                                                                                                                                                                                                                                                                                              |                                                                                                                                                                                                                                                                                              |
| Conflict of interest                                                        | -                                                                                                                                                                                                                                                                                                                                                                           |                                                                                                                                                                                                                                                                                                                                                                                                                                                                                                                              |                                                                                                                                                                                                                                                                                              |
| Part of other network(s)                                                    |                                                                                                                                                                                                                                                                                                                                                                             |                                                                                                                                                                                                                                                                                                                                                                                                                                                                                                                              |                                                                                                                                                                                                                                                                                              |
| Grouping other network(s)                                                   |                                                                                                                                                                                                                                                                                                                                                                             |                                                                                                                                                                                                                                                                                                                                                                                                                                                                                                                              |                                                                                                                                                                                                                                                                                              |
| MONITORING SUBJECT                                                          |                                                                                                                                                                                                                                                                                                                                                                             |                                                                                                                                                                                                                                                                                                                                                                                                                                                                                                                              |                                                                                                                                                                                                                                                                                              |
| Description                                                                 | Enforcement Monitoring of Pesticide Residues in Food/crops                                                                                                                                                                                                                                                                                                                  |                                                                                                                                                                                                                                                                                                                                                                                                                                                                                                                              |                                                                                                                                                                                                                                                                                              |
| Protection goal(s) and/or influencing factor(s)                             | <input checked="" type="checkbox"/> Protection goal<br><input type="checkbox"/> Biodiversity<br><input checked="" type="checkbox"/> Human Health<br><input type="checkbox"/> Animal Health<br><input type="checkbox"/> Plant Health<br><input type="checkbox"/> Soil function<br><input type="checkbox"/> Water quality<br><input type="checkbox"/> Sustainable Agriculture | <input type="checkbox"/> Influencing factor<br><input type="checkbox"/> Agronomic practice<br><input type="checkbox"/> Plant protection<br><input type="checkbox"/> GMO cultivation<br><input type="checkbox"/> Environmental conditions                                                                                                                                                                                                                                                                                     |                                                                                                                                                                                                                                                                                              |
| Duplication of Farmer's questionnaire                                       | <input checked="" type="checkbox"/> No duplication<br><input type="checkbox"/> Partly duplication<br><input type="checkbox"/> Complete duplication                                                                                                                                                                                                                          |                                                                                                                                                                                                                                                                                                                                                                                                                                                                                                                              |                                                                                                                                                                                                                                                                                              |
| SPECIFICITY                                                                 |                                                                                                                                                                                                                                                                                                                                                                             |                                                                                                                                                                                                                                                                                                                                                                                                                                                                                                                              |                                                                                                                                                                                                                                                                                              |
| Geography                                                                   | <input type="checkbox"/> EU -wide                                                                                                                                                                                                                                                                                                                                           |                                                                                                                                                                                                                                                                                                                                                                                                                                                                                                                              |                                                                                                                                                                                                                                                                                              |
|                                                                             | <input type="checkbox"/> Zone A – North                                                                                                                                                                                                                                                                                                                                     | <input checked="" type="checkbox"/> Zone B – Centre:                                                                                                                                                                                                                                                                                                                                                                                                                                                                         | <input type="checkbox"/> Zone C – South                                                                                                                                                                                                                                                      |
|                                                                             | <input type="checkbox"/> Denmark,<br><input type="checkbox"/> Estonia,<br><input type="checkbox"/> Latvia,<br><input type="checkbox"/> Lithuania,<br><input type="checkbox"/> Finland,<br><input type="checkbox"/> Sweden                                                                                                                                                   | <input type="checkbox"/> Belgium,<br><input type="checkbox"/> Czech Republic<br><input type="checkbox"/> Germany,<br><input type="checkbox"/> Ireland,<br><input type="checkbox"/> Luxembourg,<br><input type="checkbox"/> Hungary,<br><input type="checkbox"/> Netherlands,<br><input type="checkbox"/> Austria,<br><input type="checkbox"/> Poland,<br><input type="checkbox"/> Romania,<br><input type="checkbox"/> Slovenia,<br><input type="checkbox"/> Slovakia,<br><input checked="" type="checkbox"/> United Kingdom | <input type="checkbox"/> Bulgaria,<br><input type="checkbox"/> Greece,<br><input type="checkbox"/> Spain,<br><input type="checkbox"/> France,<br><input type="checkbox"/> Italy,<br><input type="checkbox"/> Cyprus,<br><input type="checkbox"/> Malta,<br><input type="checkbox"/> Portugal |
|                                                                             | <input type="checkbox"/> Regional (specify)<br><input type="checkbox"/> Local (specify)                                                                                                                                                                                                                                                                                     |                                                                                                                                                                                                                                                                                                                                                                                                                                                                                                                              |                                                                                                                                                                                                                                                                                              |
| Factors                                                                     | <input checked="" type="checkbox"/> Multiple species/items (specify): pesticide residues in food<br><input type="checkbox"/> Single species/item (specify)                                                                                                                                                                                                                  |                                                                                                                                                                                                                                                                                                                                                                                                                                                                                                                              |                                                                                                                                                                                                                                                                                              |
| Crop                                                                        | <input type="checkbox"/> No specific crop(s)<br><input checked="" type="checkbox"/> Several crops (e.g. all cereals)<br><input type="checkbox"/> Single crop                                                                                                                                                                                                                |                                                                                                                                                                                                                                                                                                                                                                                                                                                                                                                              |                                                                                                                                                                                                                                                                                              |
| Trait /treatment                                                            | <input checked="" type="checkbox"/> No specific traits/treatments<br><input type="checkbox"/> Several traits/treatments<br><input type="checkbox"/> Single trait/treatment                                                                                                                                                                                                  |                                                                                                                                                                                                                                                                                                                                                                                                                                                                                                                              |                                                                                                                                                                                                                                                                                              |



|                                                                                                           |                                                                                                                                                                                                                                                                        |
|-----------------------------------------------------------------------------------------------------------|------------------------------------------------------------------------------------------------------------------------------------------------------------------------------------------------------------------------------------------------------------------------|
| GMO                                                                                                       | <input checked="" type="checkbox"/> No GMO bias<br><input type="checkbox"/> GMO specific                                                                                                                                                                               |
| <b>METHODOLOGY</b>                                                                                        |                                                                                                                                                                                                                                                                        |
| Observations                                                                                              | <input checked="" type="checkbox"/> Reported, verifiable methodology<br><input type="checkbox"/> Reported, unverifiable methodology<br><input type="checkbox"/> Unknown, unverifiable methodology                                                                      |
| Frequency                                                                                                 | <input checked="" type="checkbox"/> > 1 time/year<br><input type="checkbox"/> 1 time/year<br><input type="checkbox"/> < 1 time/year                                                                                                                                    |
| Future                                                                                                    | <input checked="" type="checkbox"/> For ≥ 5 years<br><input type="checkbox"/> between 1 and 5 years<br><input type="checkbox"/> no prospect                                                                                                                            |
| Quality of performers                                                                                     | <input checked="" type="checkbox"/> Trained, professionals<br><input type="checkbox"/> Trained, non-professionals – training by documentation, volunteers<br><input type="checkbox"/> Uncertain or not -specified                                                      |
| Quality of data                                                                                           | <input checked="" type="checkbox"/> Standard recording of raw data<br><input type="checkbox"/> Free recording of raw data<br><input type="checkbox"/> Anecdotic                                                                                                        |
| Analysis                                                                                                  | <input checked="" type="checkbox"/> Reported, verifiable methodology<br><input type="checkbox"/> Reported, unverifiable methodology<br><input type="checkbox"/> Unknown, unverifiable methodology                                                                      |
| Quality of analysis                                                                                       | <input checked="" type="checkbox"/> Scientifically based<br><input type="checkbox"/> Indicative only<br><input type="checkbox"/> Unknown                                                                                                                               |
| <b>REPORTING</b>                                                                                          |                                                                                                                                                                                                                                                                        |
| Language                                                                                                  | <input checked="" type="checkbox"/> Specify reporting language(s): English                                                                                                                                                                                             |
| Availability                                                                                              | <input type="checkbox"/> Scientific publication<br><input checked="" type="checkbox"/> Official report available on the internet or in other public forum<br><input type="checkbox"/> Official report available from network<br><input type="checkbox"/> Not available |
| Frequency                                                                                                 | <input checked="" type="checkbox"/> ≥ 1 time/year<br><input type="checkbox"/> < 1 time/year                                                                                                                                                                            |
| Historical reference                                                                                      | <input checked="" type="checkbox"/> over ≥ 5 years<br><input type="checkbox"/> between 1 and 5 years<br><input type="checkbox"/> no historical analysis                                                                                                                |
| <b>COMMENT(S)</b>                                                                                         |                                                                                                                                                                                                                                                                        |
| Information on how to use pesticides safely, incidence recording. Extensive quarterly and annual reports. |                                                                                                                                                                                                                                                                        |

## GSEN-09-0193.00.1 GB – Joint Nature Conservation Committee

| EuropaBio's coordinated approach to General Surveillance: Existing Networks |                                                                                                                                                                                                                                                                                                                                                                                                                                                                                                                                                                                      |                                                                                                                                                                                                                                              |  |
|-----------------------------------------------------------------------------|--------------------------------------------------------------------------------------------------------------------------------------------------------------------------------------------------------------------------------------------------------------------------------------------------------------------------------------------------------------------------------------------------------------------------------------------------------------------------------------------------------------------------------------------------------------------------------------|----------------------------------------------------------------------------------------------------------------------------------------------------------------------------------------------------------------------------------------------|--|
| <b>ORGANISATION</b>                                                         |                                                                                                                                                                                                                                                                                                                                                                                                                                                                                                                                                                                      |                                                                                                                                                                                                                                              |  |
| EuropaBio reference                                                         | GS-EN-09-0193                                                                                                                                                                                                                                                                                                                                                                                                                                                                                                                                                                        |                                                                                                                                                                                                                                              |  |
| Official name of the Network                                                | Joint Nature Conservation Committee                                                                                                                                                                                                                                                                                                                                                                                                                                                                                                                                                  |                                                                                                                                                                                                                                              |  |
| Other names                                                                 | JNCC                                                                                                                                                                                                                                                                                                                                                                                                                                                                                                                                                                                 |                                                                                                                                                                                                                                              |  |
| Type of organisation                                                        | Nature conservation<br>Foounded 1990, reconstituted 2006.                                                                                                                                                                                                                                                                                                                                                                                                                                                                                                                            |                                                                                                                                                                                                                                              |  |
| Coordinates                                                                 | JNCC (Headquarters)<br>Monkstone House<br>City Road, Peterborough<br>PE1 1JY) W<<br><br>Fax: +44 (0)1733 555948                                                                                                                                                                                                                                                                                                                                                                                                                                                                      |                                                                                                                                                                                                                                              |  |
| Website                                                                     | <a href="http://www.jncc.gov.uk/">http://www.jncc.gov.uk/</a>                                                                                                                                                                                                                                                                                                                                                                                                                                                                                                                        |                                                                                                                                                                                                                                              |  |
| Funding                                                                     | <ul style="list-style-type: none"> <li>- Department for the Environment, Food and Rural Affairs,</li> <li>- Scottish Executive,</li> <li>- Welsh Assembly Government and</li> <li>- Administration in Northern Ireland</li> </ul>                                                                                                                                                                                                                                                                                                                                                    |                                                                                                                                                                                                                                              |  |
| Conflict of interest                                                        | -                                                                                                                                                                                                                                                                                                                                                                                                                                                                                                                                                                                    |                                                                                                                                                                                                                                              |  |
| Part of other network(s)                                                    | -                                                                                                                                                                                                                                                                                                                                                                                                                                                                                                                                                                                    |                                                                                                                                                                                                                                              |  |
| Grouping other network(s)                                                   | -                                                                                                                                                                                                                                                                                                                                                                                                                                                                                                                                                                                    |                                                                                                                                                                                                                                              |  |
| <b>MONITORING SUBJECT</b>                                                   |                                                                                                                                                                                                                                                                                                                                                                                                                                                                                                                                                                                      |                                                                                                                                                                                                                                              |  |
| Description                                                                 | To establish common standards throughout the UK for nature conservation, including monitoring, research, and the analysis of results                                                                                                                                                                                                                                                                                                                                                                                                                                                 |                                                                                                                                                                                                                                              |  |
| Protection goal(s) and/or influencing factor(s)                             | <input checked="" type="checkbox"/> Protection goal<br><br><input checked="" type="checkbox"/> Biodiversity: general<br><input type="checkbox"/> Human Health<br><input type="checkbox"/> Animal Health<br><input type="checkbox"/> Plant Health<br><input type="checkbox"/> Soil function<br><input type="checkbox"/> Water quality<br><input type="checkbox"/> Sustainable Agriculture                                                                                                                                                                                             | <input type="checkbox"/> Influencing factor<br><br><input type="checkbox"/> Agronomic practice<br><input type="checkbox"/> Plant protection<br><input type="checkbox"/> GMO cultivation<br><input type="checkbox"/> Environmental conditions |  |
| Duplication of Farmer's questionnaire                                       | <input type="checkbox"/> No duplication<br><input type="checkbox"/> Partly duplication<br><input type="checkbox"/> Complete duplication                                                                                                                                                                                                                                                                                                                                                                                                                                              |                                                                                                                                                                                                                                              |  |
| <b>SPECIFICITY</b>                                                          |                                                                                                                                                                                                                                                                                                                                                                                                                                                                                                                                                                                      |                                                                                                                                                                                                                                              |  |
| Geography                                                                   | <input type="checkbox"/> EU -wide<br><br><input type="checkbox"/> Zone A – North<br><input type="checkbox"/> Denmark,<br><input type="checkbox"/> Estonia,<br><input type="checkbox"/> Latvia,<br><input type="checkbox"/> Lithuania,<br><input type="checkbox"/> Finland,<br><input type="checkbox"/> Sweden                                                                                                                                                                                                                                                                        |                                                                                                                                                                                                                                              |  |
|                                                                             | <input checked="" type="checkbox"/> Zone B – Centre:<br><input type="checkbox"/> Belgium,<br><input type="checkbox"/> Czech Republic<br><input type="checkbox"/> Germany,<br><input type="checkbox"/> Ireland,<br><input type="checkbox"/> Luxembourg,<br><input type="checkbox"/> Hungary,<br><input type="checkbox"/> Netherlands,<br><input type="checkbox"/> Austria,<br><input type="checkbox"/> Poland,<br><input type="checkbox"/> Romania,<br><input type="checkbox"/> Slovenia,<br><input type="checkbox"/> Slovakia,<br><input checked="" type="checkbox"/> United Kingdom |                                                                                                                                                                                                                                              |  |
|                                                                             | <input type="checkbox"/> Zone C – South<br><input type="checkbox"/> Bulgaria,<br><input type="checkbox"/> Greece,<br><input type="checkbox"/> Spain,<br><input type="checkbox"/> France,<br><input type="checkbox"/> Italy,<br><input type="checkbox"/> Cyprus,<br><input type="checkbox"/> Malta,<br><input type="checkbox"/> Portugal                                                                                                                                                                                                                                              |                                                                                                                                                                                                                                              |  |
|                                                                             | <input type="checkbox"/> Regional (specify)<br><input type="checkbox"/> Local (specify)                                                                                                                                                                                                                                                                                                                                                                                                                                                                                              |                                                                                                                                                                                                                                              |  |
| Factors                                                                     | <input checked="" type="checkbox"/> Multiple species/items (specify): general biodiversity<br><input type="checkbox"/> Single species/item (specify)                                                                                                                                                                                                                                                                                                                                                                                                                                 |                                                                                                                                                                                                                                              |  |
| Crop                                                                        | <input checked="" type="checkbox"/> No specific crop(s)<br><input type="checkbox"/> Several crops (e.g. all cereals):<br><input type="checkbox"/> Single crop                                                                                                                                                                                                                                                                                                                                                                                                                        |                                                                                                                                                                                                                                              |  |
| Trait /treatment                                                            | <input checked="" type="checkbox"/> No specific traits/treatments<br><input type="checkbox"/> Several traits/treatments<br><input type="checkbox"/> Single trait/treatment                                                                                                                                                                                                                                                                                                                                                                                                           |                                                                                                                                                                                                                                              |  |

|                                                                                                                                                                                                                                 |                                                                                                                                                                                                                                                                        |
|---------------------------------------------------------------------------------------------------------------------------------------------------------------------------------------------------------------------------------|------------------------------------------------------------------------------------------------------------------------------------------------------------------------------------------------------------------------------------------------------------------------|
| GMO                                                                                                                                                                                                                             | <input checked="" type="checkbox"/> No GMO bias<br><input type="checkbox"/> GMO specific                                                                                                                                                                               |
| <b>METHODOLOGY</b>                                                                                                                                                                                                              |                                                                                                                                                                                                                                                                        |
| Observations                                                                                                                                                                                                                    | <input type="checkbox"/> Reported, verifiable methodology<br><input type="checkbox"/> Reported, unverifiable methodology<br><input type="checkbox"/> Unknown, unverifiable methodology                                                                                 |
| Frequency                                                                                                                                                                                                                       | <input type="checkbox"/> > 1 time/year<br><input type="checkbox"/> 1 time/year:<br><input type="checkbox"/> < 1 time/year                                                                                                                                              |
| Future                                                                                                                                                                                                                          | <input type="checkbox"/> For ≥ 5 years<br><input type="checkbox"/> between 1 and 5 years<br><input type="checkbox"/> no prospect                                                                                                                                       |
| Quality of performers                                                                                                                                                                                                           | <input type="checkbox"/> Trained, professionals<br><input type="checkbox"/> Trained, non-professionals –<br><input type="checkbox"/> Uncertain or not -specified                                                                                                       |
| Quality of data                                                                                                                                                                                                                 | <input type="checkbox"/> Standard recording of raw data<br><input type="checkbox"/> Free recording of raw data<br><input type="checkbox"/> Anecdotic                                                                                                                   |
| Analysis                                                                                                                                                                                                                        | <input type="checkbox"/> Reported, verifiable methodology<br><input type="checkbox"/> Reported, unverifiable methodology<br><input type="checkbox"/> Unknown, unverifiable methodology                                                                                 |
| Quality of analysis                                                                                                                                                                                                             | <input type="checkbox"/> Scientifically based<br><input type="checkbox"/> Indicative only<br><input type="checkbox"/> Unknown                                                                                                                                          |
| <b>REPORTING</b>                                                                                                                                                                                                                |                                                                                                                                                                                                                                                                        |
| Language                                                                                                                                                                                                                        | Specify reporting language(s): English                                                                                                                                                                                                                                 |
| Availability                                                                                                                                                                                                                    | <input type="checkbox"/> Scientific publication<br><input checked="" type="checkbox"/> Official report available on the internet or in other public forum<br><input type="checkbox"/> Official report available from network<br><input type="checkbox"/> Not available |
| Frequency                                                                                                                                                                                                                       | <input checked="" type="checkbox"/> ≥ 1 time/year –<br><input type="checkbox"/> < 1 time/year –                                                                                                                                                                        |
| Historical reference                                                                                                                                                                                                            | <input checked="" type="checkbox"/> over ≥ 5 years<br><input type="checkbox"/> between 1 and 5 years<br><input type="checkbox"/> no historical analysis                                                                                                                |
| <b>COMMENT(S)</b>                                                                                                                                                                                                               |                                                                                                                                                                                                                                                                        |
| Network giving advice on UK policy and legislation regarding species, as well as commissioning and supporting surveillance and monitoring schemes. Annual reports. Species status assessments: National species status reviews. |                                                                                                                                                                                                                                                                        |

## GSEN-09-0234.00.1 GB – British Trust for Ornithology

| EuropaBio's coordinated approach to General Surveillance: Existing Networks |                                                                                                                                                                                                                                                                                                                                                                                    |                                                                                                                                                                                                                                                                                                                                                                                                                                                                                                                              |                                                                                                                                                                                                                                                                                              |
|-----------------------------------------------------------------------------|------------------------------------------------------------------------------------------------------------------------------------------------------------------------------------------------------------------------------------------------------------------------------------------------------------------------------------------------------------------------------------|------------------------------------------------------------------------------------------------------------------------------------------------------------------------------------------------------------------------------------------------------------------------------------------------------------------------------------------------------------------------------------------------------------------------------------------------------------------------------------------------------------------------------|----------------------------------------------------------------------------------------------------------------------------------------------------------------------------------------------------------------------------------------------------------------------------------------------|
| <b>ORGANISATION</b>                                                         |                                                                                                                                                                                                                                                                                                                                                                                    |                                                                                                                                                                                                                                                                                                                                                                                                                                                                                                                              |                                                                                                                                                                                                                                                                                              |
| EuropaBio reference                                                         | GS-EN-09-0234                                                                                                                                                                                                                                                                                                                                                                      |                                                                                                                                                                                                                                                                                                                                                                                                                                                                                                                              |                                                                                                                                                                                                                                                                                              |
| Official name of the Network                                                | <b>British Trust for Ornithology</b>                                                                                                                                                                                                                                                                                                                                               |                                                                                                                                                                                                                                                                                                                                                                                                                                                                                                                              |                                                                                                                                                                                                                                                                                              |
| Other names                                                                 | BTO                                                                                                                                                                                                                                                                                                                                                                                |                                                                                                                                                                                                                                                                                                                                                                                                                                                                                                                              |                                                                                                                                                                                                                                                                                              |
| Type of organisation                                                        | Nature conservation<br>Founded 1933.                                                                                                                                                                                                                                                                                                                                               |                                                                                                                                                                                                                                                                                                                                                                                                                                                                                                                              |                                                                                                                                                                                                                                                                                              |
| Coordinates                                                                 | BTO, The Nunnery<br>IP24 2PU<br>Thetford, Norfolk<br><br>Email: bbs[at]bto.org                                                                                                                                                                                                                                                                                                     |                                                                                                                                                                                                                                                                                                                                                                                                                                                                                                                              |                                                                                                                                                                                                                                                                                              |
| Website                                                                     | <a href="http://www.bto.org/">http://www.bto.org/</a>                                                                                                                                                                                                                                                                                                                              |                                                                                                                                                                                                                                                                                                                                                                                                                                                                                                                              |                                                                                                                                                                                                                                                                                              |
| Funding                                                                     | Membership subscriptions and donations                                                                                                                                                                                                                                                                                                                                             |                                                                                                                                                                                                                                                                                                                                                                                                                                                                                                                              |                                                                                                                                                                                                                                                                                              |
| Conflict of interest                                                        | -                                                                                                                                                                                                                                                                                                                                                                                  |                                                                                                                                                                                                                                                                                                                                                                                                                                                                                                                              |                                                                                                                                                                                                                                                                                              |
| Part of other network(s)                                                    | Relationships with Government Departments, Nature Conservation Agencies and Universities                                                                                                                                                                                                                                                                                           |                                                                                                                                                                                                                                                                                                                                                                                                                                                                                                                              |                                                                                                                                                                                                                                                                                              |
| Grouping other network(s)                                                   | -                                                                                                                                                                                                                                                                                                                                                                                  |                                                                                                                                                                                                                                                                                                                                                                                                                                                                                                                              |                                                                                                                                                                                                                                                                                              |
| <b>MONITORING SUBJECT</b>                                                   |                                                                                                                                                                                                                                                                                                                                                                                    |                                                                                                                                                                                                                                                                                                                                                                                                                                                                                                                              |                                                                                                                                                                                                                                                                                              |
| Description                                                                 | BTO is combining professional and citizen science aimed at using evidence of change in wildlife populations, particularly birds, to inform the public, opinion-formers and environmental policy- and decision-makers.<br>A broad range of surveys to monitor the status of UK birds.                                                                                               |                                                                                                                                                                                                                                                                                                                                                                                                                                                                                                                              |                                                                                                                                                                                                                                                                                              |
| Protection goal(s) and/or influencing factor(s)                             | <input checked="" type="checkbox"/> Protection goal<br><input checked="" type="checkbox"/> Biodiversity: birds<br><input type="checkbox"/> Human Health<br><input type="checkbox"/> Animal Health<br><input type="checkbox"/> Plant Health<br><input type="checkbox"/> Soil function<br><input type="checkbox"/> Water quality<br><input type="checkbox"/> Sustainable Agriculture | <input type="checkbox"/> Influencing factor<br><input type="checkbox"/> Agronomic practice<br><input type="checkbox"/> Plant protection<br><input type="checkbox"/> GMO cultivation<br><input type="checkbox"/> Environmental conditions                                                                                                                                                                                                                                                                                     |                                                                                                                                                                                                                                                                                              |
| Duplication of Farmer's questionnaire                                       | <input checked="" type="checkbox"/> No duplication<br><input type="checkbox"/> Partly duplication<br><input type="checkbox"/> Complete duplication                                                                                                                                                                                                                                 |                                                                                                                                                                                                                                                                                                                                                                                                                                                                                                                              |                                                                                                                                                                                                                                                                                              |
| <b>SPECIFICITY</b>                                                          |                                                                                                                                                                                                                                                                                                                                                                                    |                                                                                                                                                                                                                                                                                                                                                                                                                                                                                                                              |                                                                                                                                                                                                                                                                                              |
| Geography                                                                   | <input type="checkbox"/> EU -wide<br><input type="checkbox"/> Zone A – North<br><input checked="" type="checkbox"/> Zone B – Centre:<br><input type="checkbox"/> Zone C – South                                                                                                                                                                                                    |                                                                                                                                                                                                                                                                                                                                                                                                                                                                                                                              |                                                                                                                                                                                                                                                                                              |
|                                                                             | <input type="checkbox"/> Denmark,<br><input type="checkbox"/> Estonia,<br><input type="checkbox"/> Latvia,<br><input type="checkbox"/> Lithuania,<br><input type="checkbox"/> Finland,<br><input type="checkbox"/> Sweden                                                                                                                                                          | <input type="checkbox"/> Belgium,<br><input type="checkbox"/> Czech Republic<br><input type="checkbox"/> Germany,<br><input type="checkbox"/> Ireland,<br><input type="checkbox"/> Luxembourg,<br><input type="checkbox"/> Hungary,<br><input type="checkbox"/> Netherlands,<br><input type="checkbox"/> Austria,<br><input type="checkbox"/> Poland,<br><input type="checkbox"/> Romania,<br><input type="checkbox"/> Slovenia,<br><input type="checkbox"/> Slovakia,<br><input checked="" type="checkbox"/> United Kingdom | <input type="checkbox"/> Bulgaria,<br><input type="checkbox"/> Greece,<br><input type="checkbox"/> Spain,<br><input type="checkbox"/> France,<br><input type="checkbox"/> Italy,<br><input type="checkbox"/> Cyprus,<br><input type="checkbox"/> Malta,<br><input type="checkbox"/> Portugal |
|                                                                             | <input type="checkbox"/> Regional (specify)<br><input type="checkbox"/> Local (specify)                                                                                                                                                                                                                                                                                            |                                                                                                                                                                                                                                                                                                                                                                                                                                                                                                                              |                                                                                                                                                                                                                                                                                              |
| Factors                                                                     | <input checked="" type="checkbox"/> Multiple species/items (specify): birds<br><input type="checkbox"/> Single species/item (specify)                                                                                                                                                                                                                                              |                                                                                                                                                                                                                                                                                                                                                                                                                                                                                                                              |                                                                                                                                                                                                                                                                                              |
| Crop                                                                        | <input checked="" type="checkbox"/> No specific crop(s)<br><input type="checkbox"/> Several crops (e.g. all cereals):<br><input type="checkbox"/> Single crop                                                                                                                                                                                                                      |                                                                                                                                                                                                                                                                                                                                                                                                                                                                                                                              |                                                                                                                                                                                                                                                                                              |
| Trait /treatment                                                            | <input checked="" type="checkbox"/> No specific traits/treatments<br><input type="checkbox"/> Several traits/treatments<br><input type="checkbox"/> Single trait/treatment                                                                                                                                                                                                         |                                                                                                                                                                                                                                                                                                                                                                                                                                                                                                                              |                                                                                                                                                                                                                                                                                              |
| GMO                                                                         | <input checked="" type="checkbox"/> No GMO bias<br><input type="checkbox"/> GMO specific                                                                                                                                                                                                                                                                                           |                                                                                                                                                                                                                                                                                                                                                                                                                                                                                                                              |                                                                                                                                                                                                                                                                                              |

| <b>METHODOLOGY</b>                                                                                                                                                                 |                                                                                                                                                                                                                                                                        |
|------------------------------------------------------------------------------------------------------------------------------------------------------------------------------------|------------------------------------------------------------------------------------------------------------------------------------------------------------------------------------------------------------------------------------------------------------------------|
| Observations                                                                                                                                                                       | <input type="checkbox"/> Reported, verifiable methodology<br><input type="checkbox"/> Reported, unverifiable methodology<br><input type="checkbox"/> Unknown, unverifiable methodology                                                                                 |
| Frequency                                                                                                                                                                          | <input type="checkbox"/> > 1 time/year<br><input type="checkbox"/> 1 time/year:<br><input type="checkbox"/> < 1 time/year                                                                                                                                              |
| Future                                                                                                                                                                             | <input type="checkbox"/> For ≥ 5 years<br><input type="checkbox"/> between 1 and 5 years<br><input type="checkbox"/> no prospect                                                                                                                                       |
| Quality of performers                                                                                                                                                              | <input type="checkbox"/> Trained, professionals<br><input checked="" type="checkbox"/> Trained, non-professionals –<br><input type="checkbox"/> Uncertain or not -specified                                                                                            |
| Quality of data                                                                                                                                                                    | <input type="checkbox"/> Standard recording of raw data<br><input type="checkbox"/> Free recording of raw data<br><input type="checkbox"/> Anecdotic                                                                                                                   |
| Analysis                                                                                                                                                                           | <input checked="" type="checkbox"/> Reported, verifiable methodology<br><input type="checkbox"/> Reported, unverifiable methodology<br><input type="checkbox"/> Unknown, unverifiable methodology                                                                      |
| Quality of analysis                                                                                                                                                                | <input type="checkbox"/> Scientifically based<br><input type="checkbox"/> Indicative only<br><input type="checkbox"/> Unknown                                                                                                                                          |
| <b>REPORTING</b>                                                                                                                                                                   |                                                                                                                                                                                                                                                                        |
| Language                                                                                                                                                                           | Specify reporting language(s): English                                                                                                                                                                                                                                 |
| Availability                                                                                                                                                                       | <input type="checkbox"/> Scientific publication<br><input checked="" type="checkbox"/> Official report available on the internet or in other public forum<br><input type="checkbox"/> Official report available from network<br><input type="checkbox"/> Not available |
| Frequency                                                                                                                                                                          | <input checked="" type="checkbox"/> ≥ 1 time/year –<br><input type="checkbox"/> < 1 time/year –                                                                                                                                                                        |
| Historical reference                                                                                                                                                               | <input checked="" type="checkbox"/> over ≥ 5 years<br><input type="checkbox"/> between 1 and 5 years<br><input type="checkbox"/> no historical analysis                                                                                                                |
| <b>COMMENT(S)</b>                                                                                                                                                                  |                                                                                                                                                                                                                                                                        |
| Annual reports, Atlases; Scientific publications, research reports on several topics; BTO journal 'Bird study' 4 times a year; etc. Long-term datasets some in excess of 50 years. |                                                                                                                                                                                                                                                                        |

## GSEN-09-0235.00.1 GB – Royal Society for the Protection of Birds

| EuropaBio's coordinated approach to General Surveillance: Existing Networks |                                                                                                                                                                                                                                                                                                                                                                                    |                                                                                                                                                                                                                                                                                                                                                                                                                                                                                                                              |                                                                                                                                                                                                                                                                                              |
|-----------------------------------------------------------------------------|------------------------------------------------------------------------------------------------------------------------------------------------------------------------------------------------------------------------------------------------------------------------------------------------------------------------------------------------------------------------------------|------------------------------------------------------------------------------------------------------------------------------------------------------------------------------------------------------------------------------------------------------------------------------------------------------------------------------------------------------------------------------------------------------------------------------------------------------------------------------------------------------------------------------|----------------------------------------------------------------------------------------------------------------------------------------------------------------------------------------------------------------------------------------------------------------------------------------------|
| <b>ORGANISATION</b>                                                         |                                                                                                                                                                                                                                                                                                                                                                                    |                                                                                                                                                                                                                                                                                                                                                                                                                                                                                                                              |                                                                                                                                                                                                                                                                                              |
| EuropaBio reference                                                         | GS-EN-09-0235                                                                                                                                                                                                                                                                                                                                                                      |                                                                                                                                                                                                                                                                                                                                                                                                                                                                                                                              |                                                                                                                                                                                                                                                                                              |
| Official name of the Network                                                | <b>Royal Society for the Protection of Birds</b>                                                                                                                                                                                                                                                                                                                                   |                                                                                                                                                                                                                                                                                                                                                                                                                                                                                                                              |                                                                                                                                                                                                                                                                                              |
| Other names                                                                 | RSPB                                                                                                                                                                                                                                                                                                                                                                               |                                                                                                                                                                                                                                                                                                                                                                                                                                                                                                                              |                                                                                                                                                                                                                                                                                              |
| Type of organisation                                                        | Nature conservation<br>Founded 1889.                                                                                                                                                                                                                                                                                                                                               |                                                                                                                                                                                                                                                                                                                                                                                                                                                                                                                              |                                                                                                                                                                                                                                                                                              |
| Coordinates                                                                 | RSPB, The Lodge, Potton Road<br>SG19 2DL<br>Sandy, Bedfordshire                                                                                                                                                                                                                                                                                                                    |                                                                                                                                                                                                                                                                                                                                                                                                                                                                                                                              |                                                                                                                                                                                                                                                                                              |
| Website                                                                     | <a href="http://www.rspb.org.uk">http://www.rspb.org.uk</a>                                                                                                                                                                                                                                                                                                                        |                                                                                                                                                                                                                                                                                                                                                                                                                                                                                                                              |                                                                                                                                                                                                                                                                                              |
| Funding                                                                     | Membership subscriptions and donations                                                                                                                                                                                                                                                                                                                                             |                                                                                                                                                                                                                                                                                                                                                                                                                                                                                                                              |                                                                                                                                                                                                                                                                                              |
| Conflict of interest                                                        | -                                                                                                                                                                                                                                                                                                                                                                                  |                                                                                                                                                                                                                                                                                                                                                                                                                                                                                                                              |                                                                                                                                                                                                                                                                                              |
| Part of other network(s)                                                    | BirdLife International, Europe<br>partnership with BTO and JNCC                                                                                                                                                                                                                                                                                                                    |                                                                                                                                                                                                                                                                                                                                                                                                                                                                                                                              |                                                                                                                                                                                                                                                                                              |
| Grouping other network(s)                                                   | Local offices                                                                                                                                                                                                                                                                                                                                                                      |                                                                                                                                                                                                                                                                                                                                                                                                                                                                                                                              |                                                                                                                                                                                                                                                                                              |
| <b>MONITORING SUBJECT</b>                                                   |                                                                                                                                                                                                                                                                                                                                                                                    |                                                                                                                                                                                                                                                                                                                                                                                                                                                                                                                              |                                                                                                                                                                                                                                                                                              |
| Description                                                                 | RSPB conservation of biodiversity, especially wild birds and their habitats.<br>A.o. carrying out surveys to identify areas of land which should be protected; offering advice and support to farmers to support wildlife; conduct geospatial analysis of data to investigate geographic patterns.                                                                                 |                                                                                                                                                                                                                                                                                                                                                                                                                                                                                                                              |                                                                                                                                                                                                                                                                                              |
| Protection goal(s) and/or influencing factor(s)                             | <input checked="" type="checkbox"/> Protection goal<br><input checked="" type="checkbox"/> Biodiversity: birds<br><input type="checkbox"/> Human Health<br><input type="checkbox"/> Animal Health<br><input type="checkbox"/> Plant Health<br><input type="checkbox"/> Soil function<br><input type="checkbox"/> Water quality<br><input type="checkbox"/> Sustainable Agriculture | <input type="checkbox"/> Influencing factor<br><input type="checkbox"/> Agronomic practice<br><input type="checkbox"/> Plant protection<br><input type="checkbox"/> GMO cultivation<br><input type="checkbox"/> Environmental conditions                                                                                                                                                                                                                                                                                     |                                                                                                                                                                                                                                                                                              |
| Duplication of Farmer's questionnaire                                       | <input checked="" type="checkbox"/> No duplication<br><input type="checkbox"/> Partly duplication<br><input type="checkbox"/> Complete duplication                                                                                                                                                                                                                                 |                                                                                                                                                                                                                                                                                                                                                                                                                                                                                                                              |                                                                                                                                                                                                                                                                                              |
| <b>SPECIFICITY</b>                                                          |                                                                                                                                                                                                                                                                                                                                                                                    |                                                                                                                                                                                                                                                                                                                                                                                                                                                                                                                              |                                                                                                                                                                                                                                                                                              |
| Geography                                                                   | <input type="checkbox"/> EU -wide<br><input type="checkbox"/> Zone A – North<br><input checked="" type="checkbox"/> Zone B – Centre:<br><input type="checkbox"/> Zone C – South                                                                                                                                                                                                    |                                                                                                                                                                                                                                                                                                                                                                                                                                                                                                                              |                                                                                                                                                                                                                                                                                              |
|                                                                             | <input type="checkbox"/> Denmark,<br><input type="checkbox"/> Estonia,<br><input type="checkbox"/> Latvia,<br><input type="checkbox"/> Lithuania,<br><input type="checkbox"/> Finland,<br><input type="checkbox"/> Sweden                                                                                                                                                          | <input type="checkbox"/> Belgium,<br><input type="checkbox"/> Czech Republic<br><input type="checkbox"/> Germany,<br><input type="checkbox"/> Ireland,<br><input type="checkbox"/> Luxembourg,<br><input type="checkbox"/> Hungary,<br><input type="checkbox"/> Netherlands,<br><input type="checkbox"/> Austria,<br><input type="checkbox"/> Poland,<br><input type="checkbox"/> Romania,<br><input type="checkbox"/> Slovenia,<br><input type="checkbox"/> Slovakia,<br><input checked="" type="checkbox"/> United Kingdom | <input type="checkbox"/> Bulgaria,<br><input type="checkbox"/> Greece,<br><input type="checkbox"/> Spain,<br><input type="checkbox"/> France,<br><input type="checkbox"/> Italy,<br><input type="checkbox"/> Cyprus,<br><input type="checkbox"/> Malta,<br><input type="checkbox"/> Portugal |
|                                                                             | <input type="checkbox"/> Regional (specify)<br><input type="checkbox"/> Local (specify)                                                                                                                                                                                                                                                                                            |                                                                                                                                                                                                                                                                                                                                                                                                                                                                                                                              |                                                                                                                                                                                                                                                                                              |
| Factors                                                                     | <input checked="" type="checkbox"/> Multiple species/items (specify): birds and their habitats<br><input type="checkbox"/> Single species/item (specify)                                                                                                                                                                                                                           |                                                                                                                                                                                                                                                                                                                                                                                                                                                                                                                              |                                                                                                                                                                                                                                                                                              |
| Crop                                                                        | <input checked="" type="checkbox"/> No specific crop(s)<br><input type="checkbox"/> Several crops (e.g. all cereals):<br><input type="checkbox"/> Single crop                                                                                                                                                                                                                      |                                                                                                                                                                                                                                                                                                                                                                                                                                                                                                                              |                                                                                                                                                                                                                                                                                              |
| Trait /treatment                                                            | <input checked="" type="checkbox"/> No specific traits/treatments<br><input type="checkbox"/> Several traits/treatments<br><input type="checkbox"/> Single trait/treatment                                                                                                                                                                                                         |                                                                                                                                                                                                                                                                                                                                                                                                                                                                                                                              |                                                                                                                                                                                                                                                                                              |
| GMO                                                                         | <input checked="" type="checkbox"/> No GMO bias<br><input type="checkbox"/> GMO specific                                                                                                                                                                                                                                                                                           |                                                                                                                                                                                                                                                                                                                                                                                                                                                                                                                              |                                                                                                                                                                                                                                                                                              |
| <b>METHODOLOGY</b>                                                          |                                                                                                                                                                                                                                                                                                                                                                                    |                                                                                                                                                                                                                                                                                                                                                                                                                                                                                                                              |                                                                                                                                                                                                                                                                                              |

|                                                                                                                                                                                                                                                                    |                                                                                                                                                                                                                                                                        |
|--------------------------------------------------------------------------------------------------------------------------------------------------------------------------------------------------------------------------------------------------------------------|------------------------------------------------------------------------------------------------------------------------------------------------------------------------------------------------------------------------------------------------------------------------|
| Observations                                                                                                                                                                                                                                                       | <input type="checkbox"/> Reported, verifiable methodology<br><input type="checkbox"/> Reported, unverifiable methodology<br><input checked="" type="checkbox"/> Unknown, unverifiable methodology                                                                      |
| Frequency                                                                                                                                                                                                                                                          | <input type="checkbox"/> > 1 time/year<br><input type="checkbox"/> 1 time/year:<br><input type="checkbox"/> < 1 time/year                                                                                                                                              |
| Future                                                                                                                                                                                                                                                             | <input type="checkbox"/> For ≥ 5 years<br><input type="checkbox"/> between 1 and 5 years<br><input type="checkbox"/> no prospect                                                                                                                                       |
| Quality of performers                                                                                                                                                                                                                                              | <input type="checkbox"/> Trained, professionals<br><input checked="" type="checkbox"/> Trained, non-professionals –<br><input type="checkbox"/> Uncertain or not -specified                                                                                            |
| Quality of data                                                                                                                                                                                                                                                    | <input type="checkbox"/> Standard recording of raw data<br><input type="checkbox"/> Free recording of raw data<br><input type="checkbox"/> Anecdotic                                                                                                                   |
| Analysis                                                                                                                                                                                                                                                           | <input type="checkbox"/> Reported, verifiable methodology<br><input type="checkbox"/> Reported, unverifiable methodology<br><input type="checkbox"/> Unknown, unverifiable methodology                                                                                 |
| Quality of analysis                                                                                                                                                                                                                                                | <input type="checkbox"/> Scientifically based<br><input type="checkbox"/> Indicative only<br><input type="checkbox"/> Unknown                                                                                                                                          |
| <b>REPORTING</b>                                                                                                                                                                                                                                                   |                                                                                                                                                                                                                                                                        |
| Language                                                                                                                                                                                                                                                           | Specify reporting language(s): English                                                                                                                                                                                                                                 |
| Availability                                                                                                                                                                                                                                                       | <input type="checkbox"/> Scientific publication<br><input checked="" type="checkbox"/> Official report available on the internet or in other public forum<br><input type="checkbox"/> Official report available from network<br><input type="checkbox"/> Not available |
| Frequency                                                                                                                                                                                                                                                          | <input checked="" type="checkbox"/> ≥ 1 time/year –<br><input type="checkbox"/> < 1 time/year –                                                                                                                                                                        |
| Historical reference                                                                                                                                                                                                                                               | <input checked="" type="checkbox"/> over ≥ 5 years<br><input type="checkbox"/> between 1 and 5 years<br><input type="checkbox"/> no historical analysis                                                                                                                |
| <b>COMMENT(S)</b>                                                                                                                                                                                                                                                  |                                                                                                                                                                                                                                                                        |
| Annual monitoring of rare/sensitive species, such as bitterns and corncrakes; •National surveys of scarce and/or restricted species such as the 2009 cirl bunting national survey;•Reserves monitoring data, including non-avian species of conservation interest. |                                                                                                                                                                                                                                                                        |
